# Supplementary material for: Alterations in the HLA-B*57:01 Immunopeptidome by Flucloxacillin and Immunogenicity of Drug-Haptenated Peptides
Source: Front Immunol. 2021 Feb 9;11:629399. doi: 10.3389/fimmu.2020.629399 (PMC7900192; doi:10.3389/fimmu.2020.629399)
Supplement: Supplementary file 5 [file Table_1.xlsx]

## Sheet: Table S1-Proteome
Protein Group	Protein ID	Accession	Significance	Coverage (%)	#Peptides	#Unique	PTM	721221 5701 Unt11 Intensity	721221 5701 Unt12 Intensity	721221 5701 Unt13 Intensity	721221 5701 Unt21 Intensity	721221 5701 Unt22 Intensity	721221 5701 Unt23 Intensity	721221 5701 NorFlx11 Intensity	721221 5701 NorFlx12 Intensity	721221 5701 NorFlx13 Intensity	721221 5701 NorFlx21 Intensity	721221 5701 NorFlx22 Intensity	721221 5701 NorFlx23 Intensity	721221 5701 IncFlx11 Intensity	721221 5701 IncFlx12 Intensity	721221 5701 IncFlx13 Intensity	721221 5701 IncFlx21 Intensity	721221 5701 IncFlx22 Intensity	721221 5701 IncFlx23 Intensity	Sample Profile (Ratio)	Unt1 Intensity	Unt2 Intensity	NorFlx1 Intensity	NorFlx2 Intensity	IncFlx1 Intensity	IncFlx2 Intensity	Group Profile (Ratio)	Avg. Mass			Description
3	3	P60709|ACTB_HUMAN	200	69	62	6	Carbamidomethylation; Acetylation (N-term); Oxidation (M); Deamidation (NQ); Pyro-glu from Q; 4 more	8780000000	11700000000	11600000000	5350000000	2240000000	6960000000	7570000000	10900000000	3290000000	6830000000	11300000000	8910000000	3240000000	4070000000	577000000	10400000000	7640000000	3430000000	1.29:1.72:1.70:0.78:0.33:1.02:1.11:1.59:0.48:1.00:1.66:1.30:0.47:0.60:0.08:1.52:1.12:0.50	10700000000	5380000000	8010000000	9040000000	2870000000	7160000000	1.18:0.60:0.89:1.00:0.32:0.79	41737	Actin cytoplasmic 1 OS=Homo sapiens GN=ACTB PE=1 SV=1
124	342	Q562R1|ACTBL_HUMAN	200	28	13	4	Acetylation (N-term); Oxidation (M); Deamidation (NQ); Oxidation (HW)	3890000000	5290000000	2370000000	366000000	524000000	3030000000	881000000	3420000000	3070000000	262000000	483000000	2140000000	24000000	1990000000	1180000000	0	974000000	1260000	14.80:20.14:9.03:1.39:2.00:11.52:3.36:13.03:11.71:1.00:1.84:8.16:0.09:7.59:4.50:0:3.71:0.02	4220000000	1570000000	2460000000	996000000	1140000000	974000000	4.23:1.57:2.47:1.00:1.15:0.98	42003	Beta-actin-like protein 2 OS=Homo sapiens GN=ACTBL2 PE=1 SV=2
210	139	P23246|SFPQ_HUMAN	200	17	9	9	Carbamidomethylation; Acetylation (N-term); Deamidation (NQ)	1790000000	1840000000	1950000000	4820000000	3960000000	3570000000	4760000000	5650000000	2990000000	4380000000	4890000000	3980000000	5860000000	5670000000	3920000000	6940000000	6290000000	5070000000	0.41:0.42:0.44:1.10:0.90:0.81:1.09:1.29:0.68:1.00:1.12:0.91:1.34:1.29:0.90:1.58:1.44:1.16	2010000000	4120000000	4470000000	4420000000	5600000000	6100000000	0.45:0.93:1.01:1.00:1.27:1.38	76150	Splicing factor proline- and glutamine-rich OS=Homo sapiens GN=SFPQ PE=1 SV=2
224	781	Q9P2E9|RRBP1_HUMAN	200	13	10	10	Deamidation (NQ); Phosphorylation (STY); Carbamidomethylation; Acetylation (N-term)	751000000	759000000	307000000	1370000000	1370000000	687000000	240000000	472000000	169000000	444000000	679000000	406000000	234000000	511000000	386000000	918000000	783000000	791000000	1.69:1.71:0.69:3.09:3.10:1.55:0.54:1.06:0.38:1.00:1.53:0.92:0.53:1.15:0.87:2.07:1.76:1.78	692000000	1140000000	327000000	510000000	441000000	862000000	1.36:2.24:0.64:1.00:0.87:1.69	152472	Ribosome-binding protein 1 OS=Homo sapiens GN=RRBP1 PE=1 SV=4
338	696	O43491|E41L2_HUMAN	200	20	12	11	Acetylation (N-term); Pyro-glu from Q; Carbamidomethylation; Deamidation (NQ)	1250000000	1090000000	839000000	1110000000	1370000000	659000000	325000000	343000000	310000000	921000000	1370000000	645000000	934000000	1190000000	758000000	1240000000	1100000000	1020000000	1.36:1.18:0.91:1.21:1.48:0.72:0.35:0.37:0.34:1.00:1.49:0.70:1.01:1.30:0.82:1.35:1.19:1.11	1060000000	1050000000	326000000	980000000	962000000	1120000000	1.08:1.07:0.33:1.00:0.98:1.14	112588	Band 4.1-like protein 2 OS=Homo sapiens GN=EPB41L2 PE=1 SV=1
366	1643	Q03001|DYST_HUMAN	200	1	6	4	Citrullination	343000000	299000000	354000000	296000000	285000000	248000000	496000000	631000000	596000000	609000000	669000000	627000000	81300000	110000000	73900000	694000000	790000000	755000000	0.56:0.49:0.58:0.49:0.47:0.41:0.81:1.04:0.98:1.00:1.10:1.03:0.13:0.18:0.12:1.14:1.30:1.24	332000000	276000000	574000000	635000000	88400000	746000000	0.52:0.44:0.90:1.00:0.14:1.18	860679	Dystonin OS=Homo sapiens GN=DST PE=1 SV=4
413	483	Q01105|SET_HUMAN	200	40	9	4	Acetylation (N-term); Deamidation (NQ); Pyro-glu from Q; Pyro-glu from E	269000000	87300000	53500000	1190000000	1420000000	884000000	276000000	580000000	26600000	1460000000	1300000000	1120000000	572000000	483000000	432000000	1370000000	441000000	1270000000	0.18:0.06:0.04:0.82:0.97:0.61:0.19:0.40:0.02:1.00:0.89:0.77:0.39:0.33:0.30:0.94:0.30:0.87	265000000	1160000000	416000000	1340000000	496000000	1360000000	0.20:0.87:0.31:1.00:0.37:1.02	33489	Protein SET OS=Homo sapiens GN=SET PE=1 SV=3
475	901	P04440|DPB1_HUMAN	200	24	6	5	Acetylation (N-term); Deamidation (NQ)	919000000	845000000	1110000000	2180000000	3630000000	1690000000	751000000	762000000	870000000	2180000000	4430000000	1340000000	1120000000	1320000000	451000000	1820000000	1200000000	1090000000	0.42:0.39:0.51:1.00:1.67:0.78:0.34:0.35:0.40:1.00:2.03:0.61:0.52:0.60:0.21:0.84:0.55:0.50	1040000000	2610000000	898000000	2770000000	1190000000	1460000000	0.37:0.94:0.32:1.00:0.43:0.53	29159	HLA class II histocompatibility antigen DP beta 1 chain OS=Homo sapiens GN=HLA-DPB1 PE=1 SV=1
524	825	Q9UBT2|SAE2_HUMAN	200	11	6	6	Carbamidomethylation; Acetylation (N-term)	403000000	387000000	443000000	636000000	528000000	385000000	512000000	566000000	491000000	891000000	824000000	763000000	550000000	700000000	410000000	1570000000	1700000000	1160000000	0.45:0.43:0.50:0.71:0.59:0.43:0.58:0.64:0.55:1.00:0.92:0.86:0.62:0.79:0.46:1.76:1.91:1.30	411000000	516000000	581000000	831000000	585000000	1480000000	0.49:0.62:0.70:1.00:0.70:1.78	71224	SUMO-activating enzyme subunit 2 OS=Homo sapiens GN=UBA2 PE=1 SV=2
671	1262	P16402|H13_HUMAN	200	22	5	2	Acetylation (N-term); Phosphorylation (STY)	2780000000	3990000000	2680000000	3280000000	1260000000	2960000000	3930000000	5170000000	4280000000	5520000000	5760000000	5360000000	1450000000	1420000000	1040000000	3340000000	4430000000	3100000000	0.50:0.72:0.49:0.59:0.23:0.54:0.71:0.94:0.77:1.00:1.04:0.97:0.26:0.26:0.19:0.60:0.80:0.56	3150000000	2600000000	4460000000	5550000000	1300000000	3620000000	0.57:0.47:0.80:1.00:0.23:0.65	22350	Histone H1.3 OS=Homo sapiens GN=HIST1H1D PE=1 SV=2
702	818	Q9NYF8|BCLF1_HUMAN	200	17	10	9	Carbamidomethylation; Phosphorylation (STY)	455000000	612000000	491000000	1290000000	322000000	817000000	1630000000	1340000000	1910000000	2520000000	1460000000	3110000000	1350000000	1020000000	556000000	2540000000	3120000000	2060000000	0.18:0.24:0.20:0.51:0.13:0.32:0.65:0.53:0.76:1.00:0.58:1.23:0.54:0.40:0.22:1.01:1.24:0.82	527000000	809000000	1640000000	2370000000	981000000	2870000000	0.22:0.34:0.69:1.00:0.41:1.21	106122	Bcl-2-associated transcription factor 1 OS=Homo sapiens GN=BCLAF1 PE=1 SV=2
718	596	P62820|RAB1A_HUMAN	200	40	9	4	Pyro-glu from Q; Acetylation (N-term); Oxidation (M); Deamidation (NQ); Phosphorylation (STY)	1240000000	1130000000	1180000000	191000000	226000000	146000000	259000000	139000000	323000000	388000000	369000000	364000000	344000000	257000000	1010000000	354000000	322000000	291000000	3.19:2.91:3.03:0.49:0.58:0.38:0.67:0.36:0.83:1.00:0.95:0.94:0.89:0.66:2.60:0.91:0.83:0.75	1180000000	200000000	294000000	374000000	536000000	322000000	3.16:0.54:0.79:1.00:1.43:0.86	22678	Ras-related protein Rab-1A OS=Homo sapiens GN=RAB1A PE=1 SV=3
723	1196	P35580|MYH10_HUMAN	200	4	7	4	Carbamidomethylation; Phosphorylation (STY); Deamidation (NQ); Oxidation (HW); Citrullination	459000000	4650000000	157000000	1170000000	679000000	507000000	108000000	304000000	84700000	415000000	210000000	190000000	472000000	165000000	187000000	53700000	1540000000	894000000	1.11:11.21:0.38:2.82:1.64:1.22:0.26:0.73:0.20:1.00:0.51:0.46:1.14:0.40:0.45:0.13:3.72:2.15	1760000000	785000000	166000000	272000000	275000000	1220000000	6.46:2.89:0.61:1.00:1.01:4.50	228997	Myosin-10 OS=Homo sapiens GN=MYH10 PE=1 SV=3
820	1766	Q9NZB2|F120A_HUMAN	200	7	5	5		166000000	182000000	122000000	382000000	398000000	375000000	264000000	277000000	233000000	620000000	415000000	305000000	436000000	410000000	244000000	519000000	588000000	392000000	0.27:0.29:0.20:0.62:0.64:0.61:0.43:0.45:0.38:1.00:0.67:0.49:0.70:0.66:0.39:0.84:0.95:0.63	187000000	402000000	258000000	447000000	363000000	500000000	0.42:0.90:0.58:1.00:0.81:1.12	121888	Constitutive coactivator of PPAR-gamma-like protein 1 OS=Homo sapiens GN=FAM120A PE=1 SV=2
843	977	Q08378|GOGA3_HUMAN	200	7	7	7	Acetylation (N-term); Oxidation (M); Deamidation (NQ); Phosphorylation (STY)	2780000000	1640000000	143000000	836000000	311000000	141000000	93900000	75600000	51600000	211000000	347000000	160000000	188000000	268000000	237000000	292000000	278000000	226000000	13.17:7.79:0.68:3.96:1.47:0.67:0.44:0.36:0.24:1.00:1.64:0.76:0.89:1.27:1.12:1.39:1.32:1.07	2210000000	867000000	110000000	239000000	231000000	266000000	9.22:3.62:0.46:1.00:0.96:1.11	167354	Golgin subfamily A member 3 OS=Homo sapiens GN=GOLGA3 PE=1 SV=2
844	970	Q7Z460|CLAP1_HUMAN	200	6	7	4	Carbamidomethylation; Acetylation (N-term); Deamidation (NQ)	310000000	527000000	464000000	433000000	357000000	486000000	78600000	284000000	138000000	758000000	624000000	522000000	816000000	740000000	696000000	431000000	340000000	544000000	0.41:0.69:0.61:0.57:0.47:0.64:0.10:0.38:0.18:1.00:0.82:0.69:1.08:0.98:0.92:0.57:0.45:0.72	515000000	511000000	180000000	634000000	751000000	604000000	0.81:0.80:0.28:1.00:1.18:0.95	169450	CLIP-associating protein 1 OS=Homo sapiens GN=CLASP1 PE=1 SV=1
865	692	P49756|RBM25_HUMAN	200	16	9	8	Deamidation (NQ); Phosphorylation (STY)	186000000	173000000	143000000	618000000	440000000	376000000	542000000	507000000	361000000	536000000	605000000	608000000	770000000	608000000	437000000	717000000	764000000	487000000	0.35:0.32:0.27:1.15:0.82:0.70:1.01:0.95:0.67:1.00:1.13:1.13:1.44:1.13:0.81:1.34:1.43:0.91	174000000	478000000	472000000	684000000	605000000	711000000	0.25:0.70:0.69:1.00:0.88:1.04	100186	RNA-binding protein 25 OS=Homo sapiens GN=RBM25 PE=1 SV=3
875	688	P26583|HMGB2_HUMAN	200	36	9	6	Carbamidomethylation	1420000000	381000000	963000000	1250000000	426000000	1210000000	316000000	354000000	264000000	1720000000	1150000000	1060000000	1160000000	774000000	1110000000	845000000	1470000000	1160000000	0.83:0.22:0.56:0.73:0.25:0.71:0.18:0.21:0.15:1.00:0.67:0.62:0.67:0.45:0.65:0.49:0.86:0.68	921000000	1160000000	317000000	1310000000	1010000000	1160000000	0.70:0.89:0.24:1.00:0.77:0.88	24034	High mobility group protein B2 OS=Homo sapiens GN=HMGB2 PE=1 SV=2
928	1214	Q9C0C9|UBE2O_HUMAN	200	12	8	7	Carbamidomethylation; Phosphorylation (STY); Pyro-glu from Q; Oxidation (HW); Acetylation (N-term)	1530000000	1670000000	1060000000	5070000000	3450000000	1370000000	770000000	1250000000	540000000	1690000000	1280000000	679000000	1830000000	1200000000	999000000	532000000	482000000	474000000	0.90:0.98:0.63:3.00:2.04:0.81:0.45:0.74:0.32:1.00:0.76:0.40:1.08:0.71:0.59:0.31:0.28:0.28	1420000000	3300000000	854000000	1220000000	1350000000	496000000	1.16:2.71:0.70:1.00:1.10:0.41	141293	(E3-independent) E2 ubiquitin-conjugating enzyme OS=Homo sapiens GN=UBE2O PE=1 SV=3
1004	938	Q9Y383|LC7L2_HUMAN	200	17	5	4	Carbamidomethylation; Deamidation (NQ)	918000000	675000000	769000000	1840000000	836000000	1470000000	185000000	643000000	165000000	1170000000	1380000000	814000000	1430000000	1290000000	722000000	748000000	760000000	791000000	0.79:0.58:0.66:1.58:0.71:1.26:0.16:0.55:0.14:1.00:1.18:0.70:1.22:1.10:0.62:0.64:0.65:0.68	947000000	1380000000	489000000	1330000000	1150000000	843000000	0.71:1.04:0.37:1.00:0.86:0.63	46514	Putative RNA-binding protein Luc7-like 2 OS=Homo sapiens GN=LUC7L2 PE=1 SV=2
1039	1701	Q14160|SCRIB_HUMAN	200	3	4	3	Carbamidomethylation; Phosphorylation (STY); Pyro-glu from Q; Citrullination	59200000	78100000	61400000	42200000	47800000	33800000	93800000	93000000	103000000	162000000	129000000	129000000	66100000	79500000	47300000	326000000	350000000	206000000	0.37:0.48:0.38:0.26:0.30:0.21:0.58:0.57:0.63:1.00:0.80:0.80:0.41:0.49:0.29:2.02:2.16:1.28	66200000	41300000	96400000	140000000	64300000	294000000	0.47:0.29:0.69:1.00:0.46:2.10	174884	Protein scribble homolog OS=Homo sapiens GN=SCRIB PE=1 SV=4
1084	2205	Q9UPT8|ZC3H4_HUMAN	200	7	6	6	Pyro-glu from E; Phosphorylation (STY)	208000000	274000000	207000000	213000000	361000000	244000000	440000000	446000000	450000000	583000000	515000000	608000000	246000000	220000000	203000000	1260000000	1210000000	939000000	0.36:0.47:0.35:0.37:0.62:0.42:0.75:0.77:0.77:1.00:0.88:1.04:0.42:0.38:0.35:2.15:2.07:1.61	230000000	273000000	445000000	569000000	223000000	1130000000	0.40:0.48:0.78:1.00:0.39:2.00	140256	Zinc finger CCCH domain-containing protein 4 OS=Homo sapiens GN=ZC3H4 PE=1 SV=3
1094	2500	O60343|TBCD4_HUMAN	200	5	3	3	Carbamidomethylation; Phosphorylation (STY)	179000000	148000000	140000000	318000000	228000000	216000000	177000000	165000000	130000000	263000000	260000000	247000000	195000000	201000000	171000000	532000000	780000000	414000000	0.68:0.56:0.53:1.21:0.87:0.82:0.67:0.63:0.49:1.00:0.99:0.94:0.74:0.77:0.65:2.03:2.97:1.58	156000000	255000000	157000000	256000000	189000000	575000000	0.61:0.99:0.61:1.00:0.74:2.24	146563	TBC1 domain family member 4 OS=Homo sapiens GN=TBC1D4 PE=1 SV=2
1097	1334	Q16698|DECR_HUMAN	200	25	6	5	Carbamidomethylation; Acetylation (N-term); Deamidation (NQ)	294000000	289000000	265000000	1080000000	1520000000	1110000000	742000000	976000000	428000000	1090000000	1330000000	736000000	999000000	1370000000	646000000	1940000000	1480000000	596000000	0.27:0.26:0.24:0.99:1.39:1.01:0.68:0.89:0.39:1.00:1.22:0.67:0.91:1.25:0.59:1.78:1.36:0.55	288000000	1290000000	854000000	1090000000	1000000000	1640000000	0.26:1.19:0.79:1.00:0.92:1.51	36068	2 4-dienoyl-CoA reductase mitochondrial OS=Homo sapiens GN=DECR1 PE=1 SV=1
1152	1077	P02768|ALBU_HUMAN	200	9	6	6	Carbamidomethylation; Acetylation (N-term); Deamidation (NQ); Citrullination	4090000000	2810000000	2790000000	12300000000	7570000000	6930000000	1790000000	1860000000	1470000000	4610000000	2690000000	2340000000	2750000000	3340000000	1730000000	3690000000	4030000000	2380000000	0.89:0.61:0.61:2.68:1.64:1.50:0.39:0.40:0.32:1.00:0.58:0.51:0.60:0.73:0.38:0.80:0.88:0.52	3230000000	8940000000	1710000000	3210000000	2610000000	3400000000	1.01:2.78:0.53:1.00:0.81:1.06	69367	Serum albumin OS=Homo sapiens GN=ALB PE=1 SV=2
1159	2284	O60293|ZC3H1_HUMAN	200	2	3	3	Carbamidomethylation; Acetylation (N-term); Phosphorylation (STY)	32100000	41000000	29900000	41600000	59700000	27600000	37000000	36300000	31300000	68800000	72000000	42200000	57900000	46000000	45600000	157000000	137000000	78500000	0.47:0.60:0.43:0.60:0.87:0.40:0.54:0.53:0.46:1.00:1.05:0.61:0.84:0.67:0.66:2.29:1.98:1.14	34300000	43500000	34900000	61000000	49800000	124000000	0.56:0.71:0.57:1.00:0.82:2.04	226354	Zinc finger C3H1 domain-containing protein OS=Homo sapiens GN=ZFC3H1 PE=1 SV=3
1333	668	Q15819|UB2V2_HUMAN	200	33	4	2		266000000	168000000	137000000	470000000	339000000	574000000	437000000	485000000	345000000	750000000	1050000000	682000000	165000000	209000000	118000000	887000000	803000000	822000000	0.35:0.22:0.18:0.63:0.45:0.77:0.58:0.65:0.46:1.00:1.40:0.91:0.22:0.28:0.16:1.18:1.07:1.10	190000000	472000000	422000000	827000000	164000000	837000000	0.23:0.57:0.51:1.00:0.20:1.01	16363	Ubiquitin-conjugating enzyme E2 variant 2 OS=Homo sapiens GN=UBE2V2 PE=1 SV=4
1340	20610	Q13610|PWP1_HUMAN	200	5	1	1	Phosphorylation (STY); Deamidation (NQ)	1080000	874000	958000	332000	94500	0	20600000	17400000	23800000	33900000	44500000	69700000	903000	1250000	0	157000000	174000000	111000000	0.03:0.03:0.03:0.02:0.02:0:0.61:0.51:0.70:1.00:1.31:2.06:0.03:0.04:0:4.62:5.13:3.29	970000	213000	20600000	49400000	1080000	147000000	0.02:0.02:0.42:1.00:0.02:2.98	55828	Periodic tryptophan protein 1 homolog OS=Homo sapiens GN=PWP1 PE=1 SV=1
1374	1793	P19838|NFKB1_HUMAN	200	7	5	5	Carbamidomethylation	750000000	245000000	635000000	227000000	2230000000	166000000	87000000	262000000	88200000	1190000000	599000000	809000000	153000000	1180000000	188000000	1070000000	307000000	646000000	0.63:0.21:0.53:0.19:1.87:0.14:0.07:0.22:0.07:1.00:0.50:0.68:0.13:0.99:0.16:0.90:0.26:0.54	698000000	2120000000	146000000	867000000	661000000	846000000	0.81:2.45:0.17:1.00:0.76:0.98	105356	Nuclear factor NF-kappa-B p105 subunit OS=Homo sapiens GN=NFKB1 PE=1 SV=2
1385	2141	Q8NCA5|FA98A_HUMAN	200	16	7	7	Deamidation (NQ); Citrullination; Phosphorylation (STY)	356000000	1400000000	1400000000	389000000	369000000	680000000	2120000000	565000000	2060000000	1370000000	873000000	1100000000	279000000	280000000	336000000	2260000000	2470000000	950000000	0.26:1.02:1.02:0.28:0.27:0.50:1.54:0.41:1.50:1.00:0.64:0.80:0.20:0.20:0.24:1.65:1.80:0.69	1410000000	788000000	2120000000	1120000000	413000000	2160000000	1.26:0.71:1.90:1.00:0.37:1.94	55401	Protein FAM98A OS=Homo sapiens GN=FAM98A PE=1 SV=1
1428	1115	P61006|RAB8A_HUMAN	200	20	4	2	Acetylation (N-term); Deamidation (NQ)	74700000	24400000	28700000	141000000	140000000	55000000	83000000	109000000	39600000	201000000	213000000	61100000	122000000	93900000	42600000	252000000	246000000	70700000	0.37:0.12:0.14:0.70:0.70:0.27:0.41:0.54:0.20:1.00:1.06:0.30:0.61:0.47:0.21:1.26:1.22:0.35	51600000	112000000	77300000	158000000	86200000	190000000	0.33:0.71:0.49:1.00:0.54:1.20	23668	Ras-related protein Rab-8A OS=Homo sapiens GN=RAB8A PE=1 SV=1
1518	1624	Q8WVC0|LEO1_HUMAN	200	4	2	2	Phosphorylation (STY)	27800000	28000000	23400000	42100000	29500000	32100000	44800000	65000000	48400000	124000000	105000000	99200000	47100000	51500000	31400000	155000000	155000000	140000000	0.22:0.23:0.19:0.34:0.24:0.26:0.36:0.52:0.39:1.00:0.84:0.80:0.38:0.41:0.25:1.25:1.24:1.13	26400000	34600000	52700000	109000000	43300000	150000000	0.24:0.32:0.48:1.00:0.40:1.37	75404	RNA polymerase-associated protein LEO1 OS=Homo sapiens GN=LEO1 PE=1 SV=1
1534	2134	Q9GZT3|SLIRP_HUMAN	200	22	2	2		80200000	98500000	114000000	232000000	640000000	140000000	79800000	150000000	82900000	384000000	1090000000	232000000	161000000	168000000	45000000	542000000	199000000	271000000	0.21:0.26:0.30:0.60:1.67:0.36:0.21:0.39:0.22:1.00:2.83:0.60:0.42:0.44:0.12:1.41:0.52:0.70	113000000	337000000	104000000	568000000	144000000	355000000	0.20:0.59:0.18:1.00:0.25:0.62	12349	SRA stem-loop-interacting RNA-binding protein mitochondrial OS=Homo sapiens GN=SLIRP PE=1 SV=1
1579	10259	Q9UIF9|BAZ2A_HUMAN	200	4	5	5	Phosphorylation (STY)	41200000	37400000	35300000	35900000	42000000	25100000	64300000	67100000	44200000	66300000	69000000	56200000	29400000	26400000	23400000	195000000	241000000	122000000	0.62:0.56:0.53:0.54:0.63:0.38:0.97:1.01:0.67:1.00:1.04:0.85:0.44:0.40:0.35:2.94:3.64:1.84	38800000	34300000	58600000	63800000	26400000	186000000	0.61:0.54:0.92:1.00:0.41:2.91	211196	Bromodomain adjacent to zinc finger domain protein 2A OS=Homo sapiens GN=BAZ2A PE=1 SV=4
1626	1174	Q9NVX2|NLE1_HUMAN	200	13	5	5	Deamidation (NQ); Carbamidomethylation; Oxidation (HW)	94000000	122000000	52500000	134000000	135000000	84100000	99200000	132000000	73300000	134000000	105000000	68500000	145000000	105000000	75100000	374000000	772000000	395000000	0.70:0.91:0.39:1.00:1.00:0.63:0.74:0.98:0.55:1.00:0.78:0.51:1.08:0.79:0.56:2.78:5.75:2.94	89600000	118000000	102000000	103000000	109000000	513000000	0.87:1.14:0.99:1.00:1.06:5.00	53320	Notchless protein homolog 1 OS=Homo sapiens GN=NLE1 PE=1 SV=4
1634	1012	P13747|HLAE_HUMAN	200	16	4	4	Carbamidomethylation	327000000	357000000	356000000	711000000	545000000	367000000	380000000	411000000	407000000	544000000	474000000	477000000	484000000	430000000	437000000	1420000000	1570000000	812000000	0.60:0.66:0.66:1.31:1.00:0.67:0.70:0.76:0.75:1.00:0.87:0.88:0.89:0.79:0.80:2.62:2.88:1.49	347000000	541000000	399000000	498000000	450000000	1270000000	0.70:1.09:0.80:1.00:0.90:2.55	40157	HLA class I histocompatibility antigen alpha chain E OS=Homo sapiens GN=HLA-E PE=1 SV=3
1640	1731	P62837|UB2D2_HUMAN	200	16	3	2	Carbamidomethylation	191000000	231000000	219000000	1000000000	1420000000	999000000	110000000	104000000	78200000	165000000	185000000	167000000	108000000	104000000	81800000	518000000	668000000	572000000	1.16:1.40:1.32:6.04:8.60:6.04:0.67:0.63:0.47:1.00:1.12:1.01:0.65:0.63:0.49:3.13:4.04:3.46	214000000	1140000000	97600000	172000000	98000000	586000000	1.24:6.62:0.57:1.00:0.57:3.40	16735	Ubiquitin-conjugating enzyme E2 D2 OS=Homo sapiens GN=UBE2D2 PE=1 SV=1
1703	2194	Q92667|AKAP1_HUMAN	200	4	3	2	Acetylation (N-term); Phosphorylation (STY)	47700000	28800000	49900000	89700000	83400000	66800000	19100000	46600000	29900000	96400000	73200000	81900000	82700000	67000000	77500000	284000000	300000000	121000000	0.50:0.30:0.52:0.93:0.87:0.69:0.20:0.48:0.31:1.00:0.76:0.85:0.86:0.70:0.80:2.95:3.12:1.25	42200000	80000000	36600000	83800000	75700000	235000000	0.50:0.95:0.44:1.00:0.90:2.81	97342	A-kinase anchor protein 1 mitochondrial OS=Homo sapiens GN=AKAP1 PE=1 SV=1
1735	2014	Q9UFC0|LRWD1_HUMAN	200	6	2	2	Carbamidomethylation; Phosphorylation (STY); Pyro-glu from Q	43700000	43000000	17000000	41300000	26700000	40600000	17000000	59300000	60400000	73600000	79900000	58800000	33500000	42000000	34700000	131000000	114000000	99900000	0.59:0.58:0.23:0.56:0.36:0.55:0.23:0.80:0.82:1.00:1.09:0.80:0.46:0.57:0.47:1.78:1.55:1.36	38100000	43700000	55100000	70800000	39300000	115000000	0.54:0.62:0.78:1.00:0.55:1.62	70861	Leucine-rich repeat and WD repeat-containing protein 1 OS=Homo sapiens GN=LRWD1 PE=1 SV=2
1763	2830	P51572|BAP31_HUMAN	200	12	3	3	Acetylation (N-term); Deamidation (NQ)	964000000	413000000	507000000	1070000000	483000000	641000000	40400000	213000000	56400000	916000000	883000000	765000000	921000000	423000000	687000000	1210000000	1610000000	732000000	1.05:0.45:0.55:1.17:0.53:0.70:0.04:0.23:0.06:1.00:0.96:0.84:1.01:0.46:0.75:1.32:1.76:0.80	628000000	731000000	130000000	855000000	787000000	1180000000	0.73:0.86:0.15:1.00:0.92:1.39	27992	B-cell receptor-associated protein 31 OS=Homo sapiens GN=BCAP31 PE=1 SV=3
1774	31992	P68431|H31_HUMAN	200	29	4	4	Carbamidomethylation	451000000	416000000	178000000	964000000	1730000000	412000000	252000000	295000000	153000000	635000000	554000000	277000000	349000000	282000000	152000000	988000000	1030000000	258000000	0.71:0.65:0.28:1.52:2.72:0.65:0.40:0.46:0.24:1.00:0.87:0.44:0.55:0.44:0.24:1.56:1.62:0.41	355000000	1030000000	233000000	505000000	261000000	908000000	0.70:2.05:0.46:1.00:0.52:1.80	15404	Histone H3.1 OS=Homo sapiens GN=HIST1H3A PE=1 SV=2
1777	4712	Q13439|GOGA4_HUMAN	200	1	2	2	Pyro-glu from E; Deamidation (NQ); Oxidation (HW)	34300000	30000000	28300000	24900000	17500000	17600000	247000000	15800000	18800000	31600000	35300000	25800000	444000000	4260000	2040000	166000000	222000000	244000000	1.09:0.95:0.90:0.79:0.55:0.56:7.81:0.50:0.60:1.00:1.12:0.82:14.06:0.13:0.06:5.24:7.04:7.74	30900000	20000000	246000000	30900000	444000000	211000000	1.00:0.65:7.95:1.00:14.36:6.82	261137	Golgin subfamily A member 4 OS=Homo sapiens GN=GOLGA4 PE=1 SV=1
1782	3773	Q15027|ACAP1_HUMAN	200	4	3	3	Acetylation (N-term); Citrullination	260000000	123000000	195000000	709000000	92100000	140000000	303000000	393000000	368000000	822000000	623000000	667000000	274000000	210000000	188000000	753000000	796000000	647000000	0.32:0.15:0.24:0.86:0.11:0.17:0.37:0.48:0.45:1.00:0.76:0.81:0.33:0.26:0.23:0.92:0.97:0.79	219000000	691000000	400000000	707000000	224000000	732000000	0.31:0.98:0.56:1.00:0.32:1.03	81536	Arf-GAP with coiled-coil ANK repeat and PH domain-containing protein 1 OS=Homo sapiens GN=ACAP1 PE=1 SV=1
1809	882	O94903|PROSC_HUMAN	200	19	4	4	Carbamidomethylation; Acetylation (N-term); Deamidation (NQ); Phosphorylation (STY)	696000000	768000000	739000000	1010000000	701000000	674000000	311000000	512000000	375000000	927000000	960000000	783000000	2750000000	2590000000	1960000000	3860000000	3610000000	726000000	0.75:0.83:0.80:1.09:0.76:0.73:0.34:0.55:0.40:1.00:1.04:0.84:2.96:2.79:2.11:4.16:3.89:0.78	735000000	855000000	407000000	890000000	2430000000	3540000000	0.83:0.96:0.46:1.00:2.73:3.98	30344	Proline synthase co-transcribed bacterial homolog protein OS=Homo sapiens GN=PROSC PE=1 SV=1
1859	2132	Q13077|TRAF1_HUMAN	200	17	4	4	Carbamidomethylation	434000000	402000000	293000000	513000000	635000000	424000000	144000000	191000000	88400000	426000000	676000000	303000000	377000000	536000000	365000000	717000000	461000000	532000000	1.02:0.95:0.69:1.21:1.49:1.00:0.34:0.45:0.21:1.00:1.59:0.71:0.89:1.26:0.86:1.68:1.08:1.25	422000000	524000000	141000000	586000000	426000000	607000000	0.72:0.89:0.24:1.00:0.73:1.04	46164	TNF receptor-associated factor 1 OS=Homo sapiens GN=TRAF1 PE=1 SV=1
1869	1899	P53597|SUCA_HUMAN	200	9	2	2	Pyro-glu from Q; Deamidation (NQ)	10800000000	257000000	7630000000	5230000000	7800000000	3410000000	1800000000	419000000	1980000000	811000000	1400000000	465000000	270000000	3590000000	127000000	4320000000	400000000	364000000	13.30:0.32:9.40:6.45:9.62:4.20:2.22:0.52:2.45:1.00:1.73:0.57:0.33:4.42:0.16:5.33:0.49:0.45	9180000000	5480000000	1900000000	1430000000	3410000000	4210000000	6.42:3.83:1.33:1.00:2.38:2.94	36250	Succinyl-CoA ligase [ADP/GDP-forming] subunit alpha mitochondrial OS=Homo sapiens GN=SUCLG1 PE=1 SV=4
1880	2319	Q14527|HLTF_HUMAN	200	4	3	3	Acetylation (N-term)	77500000	81400000	61500000	61400000	68900000	45500000	75700000	86000000	87600000	182000000	152000000	128000000	86600000	91900000	60600000	480000000	618000000	356000000	0.43:0.45:0.34:0.34:0.38:0.25:0.42:0.47:0.48:1.00:0.83:0.70:0.48:0.50:0.33:2.64:3.40:1.96	73500000	58600000	83100000	154000000	79700000	485000000	0.48:0.38:0.54:1.00:0.52:3.15	113928	Helicase-like transcription factor OS=Homo sapiens GN=HLTF PE=1 SV=2
1928	1955	P00747|PLMN_HUMAN	200	3	2	2	Carbamidomethylation; Oxidation (M)	952000000	829000000	483000000	437000000	1400000000	721000000	472000000	455000000	418000000	332000000	267000000	282000000	300000000	247000000	242000000	309000000	146000000	122000000	2.87:2.50:1.46:1.32:4.21:2.17:1.42:1.37:1.26:1.00:0.80:0.85:0.90:0.74:0.73:0.93:0.44:0.37	755000000	1050000000	448000000	294000000	263000000	285000000	2.57:3.56:1.53:1.00:0.90:0.97	90569	Plasminogen OS=Homo sapiens GN=PLG PE=1 SV=2
1934	1712	Q9UBV2|SE1L1_HUMAN	200	8	4	4	Oxidation (M); Deamidation (NQ)	2060000000	3560000000	1450000000	4310000000	5310000000	1600000000	2260000000	473000000	302000000	1790000000	4460000000	1230000000	1870000000	4050000000	1270000000	3030000000	3530000000	3250000000	1.15:1.99:0.81:2.41:2.97:0.90:1.26:0.26:0.17:1.00:2.49:0.69:1.05:2.26:0.71:1.70:1.98:1.82	2360000000	3750000000	1010000000	2490000000	2400000000	3270000000	0.95:1.51:0.41:1.00:0.96:1.31	88755	Protein sel-1 homolog 1 OS=Homo sapiens GN=SEL1L PE=1 SV=3
2027	1779	Q9Y4E8|UBP15_HUMAN	200	6	4	4	Carbamidomethylation; Phosphorylation (STY)	70400000	89900000	57100000	208000000	132000000	82800000	140000000	156000000	94500000	195000000	207000000	179000000	134000000	148000000	80700000	351000000	273000000	256000000	0.36:0.46:0.29:1.06:0.67:0.42:0.71:0.80:0.48:1.00:1.06:0.92:0.69:0.76:0.41:1.80:1.40:1.31	73500000	141000000	130000000	194000000	121000000	293000000	0.38:0.73:0.67:1.00:0.62:1.51	112419	Ubiquitin carboxyl-terminal hydrolase 15 OS=Homo sapiens GN=USP15 PE=1 SV=3
2172	1812	Q8NEJ9|NGDN_HUMAN	200	14	3	3	Phosphorylation (STY)	97700000	105000000	79200000	245000000	327000000	106000000	249000000	182000000	84100000	117000000	204000000	86800000	333000000	323000000	183000000	353000000	377000000	180000000	0.83:0.90:0.67:2.09:2.79:0.90:2.12:1.55:0.72:1.00:1.74:0.74:2.84:2.75:1.56:3.01:3.21:1.53	94100000	272000000	214000000	205000000	305000000	303000000	0.46:1.33:1.05:1.00:1.49:1.48	35894	Neuroguidin OS=Homo sapiens GN=NGDN PE=1 SV=1
2269	2000	Q9Y4P3|TBL2_HUMAN	200	8	2	2	Carbamidomethylation; Deamidation (NQ)	133000000	145000000	134000000	148000000	126000000	131000000	30600000	35000000	27200000	134000000	205000000	114000000	88200000	146000000	98400000	177000000	168000000	149000000	0.99:1.08:1.00:1.10:0.94:0.97:0.23:0.26:0.20:1.00:1.52:0.85:0.66:1.09:0.73:1.32:1.25:1.11	137000000	135000000	30900000	151000000	111000000	164000000	0.91:0.89:0.20:1.00:0.73:1.09	49798	Transducin beta-like protein 2 OS=Homo sapiens GN=TBL2 PE=1 SV=1
2310	1118	P62899|RL31_HUMAN	200	22	3	3	Deamidation (NQ); Phosphorylation (STY); Acetylation (N-term)	134000000	162000000	55700000	213000000	235000000	68000000	159000000	161000000	62600000	493000000	352000000	180000000	120000000	95600000	51300000	745000000	837000000	246000000	0.27:0.33:0.11:0.43:0.48:0.14:0.32:0.33:0.13:1.00:0.71:0.37:0.24:0.19:0.10:1.51:1.70:0.50	117000000	172000000	128000000	342000000	89100000	609000000	0.34:0.50:0.37:1.00:0.26:1.78	14463	60S ribosomal protein L31 OS=Homo sapiens GN=RPL31 PE=1 SV=1
2336	3216	Q9Y3D9|RT23_HUMAN	200	10	1	1		114000000	30500000	79400000	241000000	189000000	173000000	106000000	207000000	97600000	432000000	438000000	212000000	331000000	298000000	206000000	326000000	189000000	168000000	0.26:0.07:0.18:0.56:0.44:0.40:0.25:0.48:0.23:1.00:1.01:0.49:0.77:0.69:0.48:0.76:0.44:0.39	94100000	201000000	137000000	361000000	278000000	228000000	0.26:0.56:0.38:1.00:0.77:0.63	21771	28S ribosomal protein S23 mitochondrial OS=Homo sapiens GN=MRPS23 PE=1 SV=2
2340	10552	Q96FJ2|DYL2_HUMAN	200	37	2	1	Carbamidomethylation; Deamidation (NQ)	111000000	82500000	328000000	96900000	74200000	231000000	483000000	173000000	512000000	194000000	189000000	372000000	112000000	0	171000000	179000000	206000000	500000000	0.57:0.42:1.69:0.50:0.38:1.19:2.49:0.89:2.64:1.00:0.98:1.92:0.58:0:0.88:0.92:1.06:2.58	339000000	316000000	503000000	401000000	283000000	523000000	0.85:0.79:1.26:1.00:0.71:1.31	10350	Dynein light chain 2 cytoplasmic OS=Homo sapiens GN=DYNLL2 PE=1 SV=1
2404	2599	Q92609|TBCD5_HUMAN	200	7	3	3	Phosphorylation (STY)	25500000	35900000	26900000	113000000	121000000	109000000	165000000	166000000	161000000	206000000	241000000	201000000	119000000	68000000	111000000	309000000	207000000	206000000	0.12:0.17:0.13:0.55:0.59:0.53:0.80:0.80:0.78:1.00:1.17:0.98:0.58:0.33:0.54:1.50:1.00:1.00	30100000	115000000	164000000	216000000	114000000	240000000	0.14:0.53:0.76:1.00:0.53:1.11	89004	TBC1 domain family member 5 OS=Homo sapiens GN=TBC1D5 PE=1 SV=1
2437	1284	Q96C19|EFHD2_HUMAN	200	20	4	3	Carbamidomethylation	292000000	194000000	221000000	613000000	316000000	356000000	142000000	140000000	97400000	175000000	119000000	112000000	174000000	330000000	175000000	410000000	313000000	247000000	1.67:1.11:1.26:3.51:1.81:2.03:0.82:0.80:0.56:1.00:0.68:0.64:0.99:1.89:1.00:2.34:1.79:1.41	236000000	428000000	134000000	161000000	226000000	323000000	1.46:2.66:0.83:1.00:1.40:2.01	26697	EF-hand domain-containing protein D2 OS=Homo sapiens GN=EFHD2 PE=1 SV=1
2439	2757	Q9Y305|ACOT9_HUMAN	200	14	4	4	Acetylation (N-term); Deamidation (NQ)	252000000	229000000	146000000	238000000	446000000	302000000	559000000	571000000	423000000	483000000	456000000	536000000	909000000	721000000	624000000	624000000	656000000	518000000	0.52:0.47:0.30:0.49:0.92:0.62:1.16:1.18:0.87:1.00:0.94:1.11:1.88:1.49:1.29:1.29:1.36:1.07	236000000	384000000	517000000	492000000	751000000	599000000	0.48:0.78:1.05:1.00:1.53:1.22	49902	Acyl-coenzyme A thioesterase 9 mitochondrial OS=Homo sapiens GN=ACOT9 PE=1 SV=2
2447	4097	Q9UI10|EI2BD_HUMAN	200	8	3	3	Carbamidomethylation	84300000	102000000	68800000	243000000	156000000	69200000	351000000	255000000	211000000	169000000	206000000	182000000	273000000	279000000	194000000	397000000	403000000	277000000	0.50:0.61:0.41:1.44:0.93:0.41:2.08:1.51:1.25:1.00:1.22:1.08:1.62:1.65:1.15:2.35:2.39:1.64	85100000	189000000	272000000	186000000	249000000	359000000	0.46:1.02:1.47:1.00:1.34:1.93	57557	Translation initiation factor eIF-2B subunit delta OS=Homo sapiens GN=EIF2B4 PE=1 SV=2
2468	2354	Q6SPF0|SAMD1_HUMAN	200	14	3	3	Phosphorylation (STY)	80400000	97700000	45900000	178000000	82500000	90200000	156000000	170000000	58300000	235000000	331000000	179000000	180000000	202000000	141000000	238000000	323000000	176000000	0.34:0.42:0.20:0.76:0.35:0.38:0.66:0.72:0.25:1.00:1.41:0.76:0.77:0.86:0.60:1.01:1.37:0.75	74700000	117000000	128000000	249000000	174000000	246000000	0.30:0.47:0.52:1.00:0.70:0.99	56052	Atherin OS=Homo sapiens GN=SAMD1 PE=1 SV=1
2512	2434	Q9Y4Y9|LSM5_HUMAN	200	21	1	1	Acetylation (N-term); Deamidation (NQ)	1350000000	967000000	788000000	405000000	781000000	588000000	406000000	1150000000	905000000	806000000	1210000000	796000000	255000000	213000000	157000000	948000000	688000000	796000000	1.67:1.20:0.98:0.50:0.97:0.73:0.50:1.42:1.12:1.00:1.50:0.99:0.32:0.26:0.19:1.18:0.85:0.99	1030000000	591000000	820000000	941000000	208000000	811000000	1.10:0.63:0.87:1.00:0.22:0.86	9937	U6 snRNA-associated Sm-like protein LSm5 OS=Homo sapiens GN=LSM5 PE=1 SV=3
2580	2381	Q86XZ4|SPAS2_HUMAN	200	9	2	2	Acetylation (N-term); Deamidation (NQ); Carbamidomethylation	21000000	8250000	12900000	51600000	45600000	34600000	46400000	70100000	37100000	75500000	86600000	43700000	30400000	38200000	36600000	92600000	63300000	85100000	0.28:0.11:0.17:0.68:0.60:0.46:0.61:0.93:0.49:1.00:1.15:0.58:0.40:0.51:0.48:1.23:0.84:1.13	17400000	43900000	55000000	68600000	39300000	80300000	0.25:0.64:0.80:1.00:0.57:1.17	59545	Spermatogenesis-associated serine-rich protein 2 OS=Homo sapiens GN=SPATS2 PE=1 SV=1
2624	4098	Q8N3X1|FNBP4_HUMAN	200	3	2	2	Phosphorylation (STY)	1610000	2310000	1950000	1820000	2880000	1340000	17500000	13600000	16000000	26500000	16000000	29900000	8890000	9540000	3820000	51600000	55300000	31000000	0.06:0.09:0.07:0.07:0.11:0.05:0.66:0.51:0.60:1.00:0.61:1.13:0.34:0.36:0.14:1.95:2.09:1.17	2030000	2010000	15700000	24100000	7410000	46000000	0.08:0.08:0.65:1.00:0.31:1.91	110266	Formin-binding protein 4 OS=Homo sapiens GN=FNBP4 PE=1 SV=3
2715	1871	Q8TAF3|WDR48_HUMAN	200	5	3	3	Carbamidomethylation	7860000	75600000	56300000	62300000	89700000	11300000	25600000	28200000	25500000	122000000	22500000	72100000	96900000	90000000	64900000	197000000	197000000	101000000	0.06:0.62:0.46:0.51:0.74:0.09:0.21:0.23:0.21:1.00:0.18:0.59:0.80:0.74:0.53:1.62:1.62:0.83	66600000	75100000	26400000	97300000	83900000	165000000	0.68:0.77:0.27:1.00:0.86:1.69	76211	WD repeat-containing protein 48 OS=Homo sapiens GN=WDR48 PE=1 SV=1
2779	1626	P42766|RL35_HUMAN	200	19	3	2	Pyro-glu from Q	633000000	927000000	307000000	295000000	285000000	284000000	220000000	264000000	142000000	210000000	133000000	118000000	160000000	162000000	109000000	547000000	612000000	328000000	3.01:4.41:1.46:1.40:1.35:1.35:1.05:1.26:0.67:1.00:0.63:0.56:0.76:0.77:0.52:2.60:2.91:1.56	622000000	288000000	222000000	154000000	144000000	496000000	4.05:1.87:1.45:1.00:0.94:3.23	14551	60S ribosomal protein L35 OS=Homo sapiens GN=RPL35 PE=1 SV=2
2786	2734	Q15843|NEDD8_HUMAN	200	17	2	2		708000000	709000000	486000000	538000000	928000000	368000000	130000000	251000000	102000000	103000000	144000000	190000000	165000000	206000000	122000000	300000000	369000000	308000000	6.87:6.88:4.72:5.22:9.01:3.58:1.26:2.44:0.99:1.00:1.40:1.84:1.61:2.00:1.18:2.91:3.58:2.99	634000000	636000000	161000000	158000000	164000000	326000000	4.02:4.04:1.02:1.00:1.04:2.07	9072	NEDD8 OS=Homo sapiens GN=NEDD8 PE=1 SV=1
2789	10481	Q99816|TS101_HUMAN	200	11	3	3	Deamidation (NQ)	60200000	73100000	32100000	66600000	50800000	25400000	116000000	111000000	132000000	178000000	146000000	186000000	70500000	47300000	43400000	474000000	411000000	201000000	0.34:0.41:0.18:0.37:0.29:0.14:0.65:0.62:0.74:1.00:0.82:1.04:0.40:0.27:0.24:2.66:2.31:1.13	55100000	47600000	120000000	170000000	53700000	362000000	0.32:0.28:0.70:1.00:0.32:2.13	43944	Tumor susceptibility gene 101 protein OS=Homo sapiens GN=TSG101 PE=1 SV=2
2814	2827	P01600|KV108_HUMAN	200	33	2	1	Acetylation (N-term); Deamidation (NQ)	96400000	117000000	59300000	234000000	145000000	233000000	132000000	197000000	120000000	172000000	97500000	148000000	147000000	101000000	119000000	236000000	419000000	216000000	0.56:0.68:0.35:1.36:0.84:1.35:0.77:1.15:0.70:1.00:0.57:0.86:0.86:0.59:0.69:1.37:2.44:1.26	90800000	204000000	150000000	139000000	122000000	290000000	0.65:1.47:1.08:1.00:0.88:2.09	11671	Ig kappa chain V-I region Hau OS=Homo sapiens PE=1 SV=1
2829	2988	O95639|CPSF4_HUMAN	200	23	4	4	Carbamidomethylation; Acetylation (N-term)	130000000	144000000	174000000	127000000	132000000	136000000	178000000	213000000	200000000	231000000	276000000	265000000	124000000	123000000	168000000	469000000	489000000	472000000	0.56:0.62:0.75:0.55:0.57:0.59:0.77:0.92:0.86:1.00:1.19:1.14:0.54:0.53:0.73:2.03:2.11:2.04	185000000	162000000	225000000	309000000	182000000	590000000	0.60:0.53:0.73:1.00:0.59:1.91	30255	Cleavage and polyadenylation specificity factor subunit 4 OS=Homo sapiens GN=CPSF4 PE=1 SV=1
3060	2984	Q9HD45|TM9S3_HUMAN	200	7	3	3	Carbamidomethylation	36600000	11800000	23000000	33300000	87800000	22200000	40600000	24300000	38600000	86600000	135000000	49000000	31600000	112000000	15000000	401000000	554000000	262000000	0.42:0.14:0.27:0.38:1.01:0.26:0.47:0.28:0.45:1.00:1.55:0.57:0.37:1.30:0.17:4.63:6.39:3.03	30100000	93300000	34500000	90000000	53000000	406000000	0.33:1.04:0.38:1.00:0.59:4.51	67888	Transmembrane 9 superfamily member 3 OS=Homo sapiens GN=TM9SF3 PE=1 SV=2
3076	2686	O15258|RER1_HUMAN	200	10	1	1	Acetylation (N-term)	115000000	127000000	112000000	605000000	412000000	355000000	143000000	175000000	158000000	622000000	563000000	441000000	297000000	243000000	133000000	418000000	504000000	287000000	0.19:0.20:0.18:0.97:0.66:0.57:0.23:0.28:0.25:1.00:0.91:0.71:0.48:0.39:0.21:0.67:0.81:0.46	118000000	488000000	159000000	542000000	224000000	403000000	0.22:0.90:0.29:1.00:0.41:0.74	22958	Protein RER1 OS=Homo sapiens GN=RER1 PE=1 SV=1
3088	2145	Q9NRX4|PHP14_HUMAN	200	19	2	2	Acetylation (N-term)	61800000	58100000	242000000	291000000	68000000	38100000	67100000	68400000	319000000	120000000	111000000	327000000	569000000	506000000	353000000	104000000	129000000	98600000	0.52:0.49:2.02:2.43:0.57:0.32:0.56:0.57:2.66:1.00:0.92:2.72:4.74:4.22:2.94:0.87:1.08:0.82	153000000	294000000	193000000	332000000	476000000	111000000	0.46:0.89:0.58:1.00:1.43:0.33	13833	14 kDa phosphohistidine phosphatase OS=Homo sapiens GN=PHPT1 PE=1 SV=1
3163	2080	Q9NWS0|PIHD1_HUMAN	200	13	2	2	Carbamidomethylation	134000000	125000000	126000000	146000000	190000000	145000000	77400000	185000000	0	127000000	225000000	115000000	131000000	243000000	166000000	553000000	500000000	344000000	1.06:0.99:0.99:1.16:1.50:1.14:0.61:1.47:0:1.00:1.78:0.91:1.03:1.92:1.31:4.37:3.95:2.72	128000000	160000000	131000000	155000000	180000000	466000000	0.82:1.03:0.85:1.00:1.16:3.00	32363	PIH1 domain-containing protein 1 OS=Homo sapiens GN=PIH1D1 PE=1 SV=1
3200	2218	P62070|RRAS2_HUMAN	200	12	2	1	Carbamidomethylation; Phosphorylation (STY)	7730000	6520000	6160000	7790000	5220000	5710000	23100000	29200000	14200000	72700000	68500000	68000000	51400000	43100000	23100000	84800000	97000000	124000000	0.11:0.09:0.08:0.11:0.07:0.08:0.32:0.40:0.20:1.00:0.94:0.94:0.71:0.59:0.32:1.17:1.34:1.71	6800000	6390000	22200000	69700000	39200000	102000000	0.10:0.09:0.32:1.00:0.56:1.46	23400	Ras-related protein R-Ras2 OS=Homo sapiens GN=RRAS2 PE=1 SV=1
3404	1942	Q8TEA8|DTD1_HUMAN	200	22	3	3		153000000	147000000	112000000	180000000	192000000	122000000	379000000	216000000	77200000	345000000	379000000	234000000	410000000	315000000	218000000	477000000	556000000	311000000	0.44:0.43:0.32:0.52:0.56:0.35:1.10:0.63:0.22:1.00:1.10:0.68:1.19:0.91:0.63:1.38:1.61:0.90	137000000	165000000	224000000	320000000	314000000	448000000	0.43:0.51:0.70:1.00:0.98:1.40	23424	D-tyrosyl-tRNA(Tyr) deacylase 1 OS=Homo sapiens GN=DTD1 PE=1 SV=2
3643	2813	Q96GK7|FAH2A_HUMAN	200	15	3	3	Carbamidomethylation	141000000	159000000	97800000	299000000	300000000	163000000	77000000	104000000	58700000	145000000	101000000	40900000	131000000	118000000	80200000	206000000	304000000	90000000	0.97:1.10:0.67:2.06:2.07:1.13:0.53:0.72:0.40:1.00:0.70:0.28:0.90:0.81:0.55:1.42:2.10:0.62	133000000	254000000	79900000	130000000	110000000	200000000	1.02:1.95:0.61:1.00:0.84:1.54	34596	Fumarylacetoacetate hydrolase domain-containing protein 2A OS=Homo sapiens GN=FAHD2A PE=1 SV=1
3645	6838	O00626|CCL22_HUMAN	200	15	2	2	Carbamidomethylation; Acetylation (N-term); Deamidation (NQ)	41700000	42400000	38300000	143000000	127000000	121000000	23600000	21300000	25000000	220000000	195000000	193000000	44500000	38100000	36400000	206000000	206000000	158000000	0.19:0.19:0.17:0.65:0.58:0.55:0.11:0.10:0.11:1.00:0.89:0.88:0.20:0.17:0.17:0.94:0.94:0.72	40800000	130000000	24200000	203000000	39700000	190000000	0.20:0.64:0.12:1.00:0.20:0.94	10625	C-C motif chemokine 22 OS=Homo sapiens GN=CCL22 PE=1 SV=2
3667	2013	P53350|PLK1_HUMAN	200	7	3	3	Deamidation (NQ)	850000000	693000000	681000000	563000000	713000000	447000000	155000000	216000000	114000000	191000000	303000000	120000000	102000000	176000000	142000000	128000000	158000000	123000000	4.46:3.64:3.57:2.96:3.74:2.34:0.81:1.14:0.60:1.00:1.59:0.63:0.54:0.92:0.75:0.67:0.83:0.64	741000000	574000000	182000000	229000000	140000000	136000000	3.23:2.50:0.79:1.00:0.61:0.59	68255	Serine/threonine-protein kinase PLK1 OS=Homo sapiens GN=PLK1 PE=1 SV=1
3693	8331	Q58EX2|SDK2_HUMAN	200	1	2	2	Acetylation (N-term)	11200000	10300000	7070000	13100000	559000000	10600000	395000000	4690000	199000000	7450000	5940000	10200000	0	0	195000000	744000000	1300000000	254000000	1.50:1.39:0.95:1.76:64.00:1.43:53.05:0.63:26.69:1.00:0.80:1.36:0:0:26.22:64.00:64.00:34.14	9540000	561000000	297000000	7850000	195000000	765000000	1.22:64.00:37.80:1.00:24.88:64.00	239394	Protein sidekick-2 OS=Homo sapiens GN=SDK2 PE=1 SV=3
4006	2873	P69905|HBA_HUMAN	200	17	2	2		227000000	208000000	75300000	438000000	459000000	285000000	36500000	171000000	65600000	293000000	431000000	147000000	119000000	161000000	64500000	108000000	127000000	82000000	0.77:0.71:0.26:1.49:1.56:0.97:0.12:0.58:0.22:1.00:1.47:0.50:0.41:0.55:0.22:0.37:0.43:0.28	170000000	394000000	91200000	290000000	129000000	176000000	0.59:1.36:0.31:1.00:0.44:0.61	15258	Hemoglobin subunit alpha OS=Homo sapiens GN=HBA1 PE=1 SV=2
4421	2948	Q06265|EXOS9_HUMAN	200	9	3	3	Carbamidomethylation	157000000	122000000	252000000	468000000	558000000	417000000	309000000	256000000	223000000	284000000	314000000	279000000	269000000	399000000	242000000	595000000	639000000	463000000	0.55:0.43:0.89:1.65:1.96:1.47:1.09:0.90:0.78:1.00:1.11:0.98:0.95:1.40:0.85:2.09:2.25:1.63	250000000	481000000	262000000	328000000	325000000	566000000	0.76:1.47:0.80:1.00:0.99:1.72	48949	Exosome complex component RRP45 OS=Homo sapiens GN=EXOSC9 PE=1 SV=3
5906	10459	Q9Y2H0|DLGP4_HUMAN	200	3	2	2	Carbamidomethylation; Deamidation (NQ)	0	258000000	278000000	171000000	217000000	88900000	0	60300000	0	232000000	246000000	159000000	0	107000000	0	202000000	143000000	95200000	0:1.11:1.20:0.74:0.94:0.38:0:0.26:0:1.00:1.06:0.69:0:0.46:0:0.87:0.62:0.41	268000000	238000000	60300000	212000000	107000000	321000000	1.26:1.12:0.28:1.00:0.50:1.51	108012	Disks large-associated protein 4 OS=Homo sapiens GN=DLGAP4 PE=1 SV=3
17	17	P68371|TBB4B_HUMAN	156.54	59	43	1	Carbamidomethylation; Acetylation (N-term); Deamidation (NQ); Oxidation (M); Pyro-glu from E; 2 more	336000000	354000000	294000000	591000000	705000000	449000000	249000000	289000000	278000000	887000000	881000000	608000000	368000000	349000000	287000000	1210000000	1060000000	790000000	0.38:0.40:0.33:0.67:0.80:0.51:0.28:0.33:0.31:1.00:0.99:0.69:0.42:0.39:0.32:1.36:1.19:0.89	328000000	582000000	272000000	792000000	335000000	1020000000	0.41:0.73:0.34:1.00:0.42:1.29	49831	Tubulin beta-4B chain OS=Homo sapiens GN=TUBB4B PE=1 SV=1
1434	1161	P20674|COX5A_HUMAN	156.54	33	5	5	Acetylation (N-term); Deamidation (NQ); Carbamidomethylation; Citrullination	600000000	628000000	395000000	693000000	663000000	591000000	143000000	102000000	377000000	841000000	646000000	712000000	517000000	492000000	431000000	1060000000	1190000000	830000000	0.71:0.75:0.47:0.82:0.79:0.70:0.17:0.12:0.45:1.00:0.77:0.85:0.61:0.59:0.51:1.27:1.41:0.99	541000000	649000000	518000000	777000000	514000000	1030000000	0.70:0.84:0.67:1.00:0.66:1.32	16762	Cytochrome c oxidase subunit 5A mitochondrial OS=Homo sapiens GN=COX5A PE=1 SV=2
1888	1825	Q9Y6W5|WASF2_HUMAN	156.54	14	4	4	Carbamidomethylation	119000000	93100000	80100000	283000000	197000000	259000000	139000000	161000000	171000000	516000000	572000000	383000000	245000000	163000000	138000000	304000000	364000000	244000000	0.23:0.18:0.16:0.55:0.38:0.50:0.27:0.31:0.33:1.00:1.11:0.74:0.48:0.31:0.27:0.59:0.71:0.47	97500000	246000000	164000000	490000000	206000000	304000000	0.20:0.50:0.34:1.00:0.42:0.62	54284	Wiskott-Aldrich syndrome protein family member 2 OS=Homo sapiens GN=WASF2 PE=1 SV=3
515	942	P49773|HINT1_HUMAN	153.53	55	10	10	Carbamidomethylation; Acetylation (N-term); Deamidation (NQ)	134000000	161000000	120000000	242000000	261000000	127000000	365000000	179000000	385000000	429000000	373000000	218000000	224000000	394000000	166000000	417000000	632000000	239000000	0.31:0.37:0.28:0.56:0.61:0.29:0.85:0.42:0.90:1.00:0.87:0.51:0.52:0.92:0.39:0.97:1.47:0.56	164000000	210000000	366000000	340000000	299000000	429000000	0.48:0.62:1.08:1.00:0.88:1.26	13802	Histidine triad nucleotide-binding protein 1 OS=Homo sapiens GN=HINT1 PE=1 SV=2
806	1829	Q92878|RAD50_HUMAN	153.53	3	3	3	Carbamidomethylation; Oxidation (M); Deamidation (NQ)	122000000	77400000	102000000	187000000	138000000	141000000	79600000	106000000	33500000	230000000	226000000	141000000	214000000	118000000	150000000	313000000	452000000	169000000	0.53:0.34:0.44:0.81:0.60:0.61:0.35:0.46:0.15:1.00:0.98:0.61:0.93:0.51:0.65:1.36:1.96:0.73	100000000	155000000	73100000	199000000	161000000	315000000	0.50:0.78:0.37:1.00:0.81:1.58	153892	DNA repair protein RAD50 OS=Homo sapiens GN=RAD50 PE=1 SV=1
896	699	Q10713|MPPA_HUMAN	153.53	18	7	7	Deamidation (NQ); Acetylation (N-term)	133000000	185000000	20200000	219000000	203000000	121000000	181000000	214000000	118000000	262000000	332000000	179000000	201000000	126000000	101000000	392000000	428000000	250000000	0.51:0.71:0.08:0.84:0.78:0.46:0.69:0.82:0.45:1.00:1.27:0.69:0.77:0.48:0.39:1.50:1.64:0.96	152000000	181000000	171000000	258000000	159000000	357000000	0.59:0.70:0.66:1.00:0.62:1.38	58253	Mitochondrial-processing peptidase subunit alpha OS=Homo sapiens GN=PMPCA PE=1 SV=2
2497	2261	P61081|UBC12_HUMAN	153.53	21	3	3	Carbamidomethylation	834000000	852000000	250000000	963000000	999000000	1060000000	447000000	320000000	278000000	925000000	972000000	801000000	237000000	217000000	174000000	1080000000	829000000	973000000	0.90:0.92:0.27:1.04:1.08:1.15:0.48:0.35:0.30:1.00:1.05:0.87:0.26:0.23:0.19:1.17:0.90:1.05	788000000	1060000000	359000000	899000000	209000000	961000000	0.88:1.18:0.40:1.00:0.23:1.07	20900	NEDD8-conjugating enzyme Ubc12 OS=Homo sapiens GN=UBE2M PE=1 SV=1
561	717	P56537|IF6_HUMAN	150.51	41	7	7	Carbamidomethylation; Acetylation (N-term); Deamidation (NQ); Pyro-glu from Q	1280000000	1210000000	1090000000	1630000000	1220000000	1580000000	1060000000	1110000000	1250000000	1600000000	2090000000	1450000000	1290000000	1440000000	1150000000	3800000000	4100000000	3020000000	0.80:0.76:0.68:1.02:0.77:0.99:0.66:0.70:0.79:1.00:1.31:0.91:0.81:0.90:0.72:2.38:2.57:1.89	1190000000	1500000000	1140000000	1710000000	1290000000	3640000000	0.70:0.88:0.67:1.00:0.76:2.13	26599	Eukaryotic translation initiation factor 6 OS=Homo sapiens GN=EIF6 PE=1 SV=1
700	1269	Q9NSE4|SYIM_HUMAN	150.51	13	9	9	Carbamidomethylation; Pyro-glu from Q; Acetylation (N-term); Deamidation (NQ)	310000000	195000000	176000000	504000000	434000000	362000000	288000000	254000000	182000000	388000000	397000000	250000000	276000000	360000000	447000000	794000000	766000000	521000000	0.80:0.50:0.45:1.30:1.12:0.93:0.74:0.65:0.47:1.00:1.02:0.64:0.71:0.93:1.15:2.05:1.98:1.34	277000000	433000000	241000000	345000000	559000000	694000000	0.80:1.26:0.70:1.00:1.62:2.01	113791	Isoleucine--tRNA ligase mitochondrial OS=Homo sapiens GN=IARS2 PE=1 SV=2
822	611	Q08257|QOR_HUMAN	150.51	29	6	6	Pyro-glu from Q; Carbamidomethylation; Acetylation (N-term); Deamidation (NQ)	1090000000	865000000	276000000	1630000000	1560000000	1030000000	409000000	662000000	308000000	1150000000	1400000000	648000000	970000000	1120000000	135000000	1120000000	708000000	577000000	0.95:0.76:0.24:1.43:1.36:0.90:0.36:0.58:0.27:1.00:1.23:0.57:0.85:0.98:0.12:0.98:0.62:0.50	745000000	1410000000	460000000	1070000000	743000000	802000000	0.70:1.32:0.43:1.00:0.70:0.75	35207	Quinone oxidoreductase OS=Homo sapiens GN=CRYZ PE=1 SV=1
2003	1540	P63165|SUMO1_HUMAN	150.51	21	2	2	Pyro-glu from Q	248000000	417000000	109000000	653000000	564000000	258000000	338000000	483000000	209000000	869000000	586000000	337000000	611000000	455000000	206000000	918000000	1060000000	372000000	0.29:0.48:0.13:0.75:0.65:0.30:0.39:0.56:0.24:1.00:0.67:0.39:0.70:0.52:0.24:1.06:1.22:0.43	258000000	492000000	343000000	597000000	427000000	785000000	0.43:0.82:0.57:1.00:0.71:1.31	11557	Small ubiquitin-related modifier 1 OS=Homo sapiens GN=SUMO1 PE=1 SV=1
2203	2766	Q8NBJ5|GT251_HUMAN	149.55	5	3	3	Carbamidomethylation	166000000	181000000	98200000	144000000	205000000	90900000	244000000	294000000	170000000	187000000	225000000	126000000	314000000	308000000	239000000	555000000	443000000	354000000	0.89:0.97:0.53:0.77:1.10:0.49:1.31:1.57:0.91:1.00:1.21:0.68:1.68:1.65:1.28:2.97:2.37:1.89	148000000	147000000	236000000	179000000	287000000	451000000	0.83:0.82:1.32:1.00:1.60:2.51	71636	Procollagen galactosyltransferase 1 OS=Homo sapiens GN=COLGALT1 PE=1 SV=1
1240	1056	Q14764|MVP_HUMAN	148.75	5	3	3		201000000	181000000	136000000	579000000	635000000	289000000	163000000	137000000	119000000	234000000	365000000	188000000	237000000	242000000	168000000	404000000	341000000	297000000	0.86:0.77:0.58:2.47:2.71:1.24:0.69:0.59:0.51:1.00:1.56:0.80:1.01:1.03:0.72:1.73:1.45:1.27	173000000	501000000	170000000	262000000	216000000	347000000	0.66:1.91:0.65:1.00:0.82:1.32	99327	Major vault protein OS=Homo sapiens GN=MVP PE=1 SV=4
1480	1847	Q9NX40|OCAD1_HUMAN	148.75	35	5	5	Carbamidomethylation; Deamidation (NQ)	744000000	471000000	579000000	783000000	867000000	428000000	651000000	810000000	579000000	702000000	723000000	439000000	978000000	850000000	776000000	2150000000	2120000000	1160000000	1.06:0.67:0.83:1.12:1.24:0.61:0.93:1.15:0.83:1.00:1.03:0.63:1.39:1.21:1.11:3.07:3.02:1.65	684000000	693000000	680000000	656000000	893000000	1810000000	1.04:1.06:1.04:1.00:1.36:2.76	27626	OCIA domain-containing protein 1 OS=Homo sapiens GN=OCIAD1 PE=1 SV=1
1260	1692	Q9UHY1|NRBP_HUMAN	148.08	15	5	5	Acetylation (N-term); Phosphorylation (STY); Deamidation (NQ)	73900000	85000000	56800000	164000000	107000000	94000000	191000000	195000000	106000000	131000000	203000000	104000000	146000000	158000000	136000000	311000000	345000000	162000000	0.56:0.65:0.43:1.25:0.81:0.72:1.45:1.48:0.81:1.00:1.55:0.79:1.11:1.21:1.04:2.37:2.63:1.23	71900000	122000000	164000000	153000000	147000000	273000000	0.47:0.79:1.07:1.00:0.96:1.78	59845	Nuclear receptor-binding protein OS=Homo sapiens GN=NRBP1 PE=1 SV=1
3022	2909	Q86TB9|PATL1_HUMAN	148.08	5	3	3	Phosphorylation (STY)	101000000	92600000	50200000	144000000	110000000	60700000	10200000	39600000	5060000	79100000	90000000	83700000	133000000	133000000	73200000	202000000	193000000	97300000	1.27:1.17:0.63:1.82:1.39:0.77:0.13:0.50:0.06:1.00:1.14:1.06:1.69:1.68:0.93:2.56:2.43:1.23	81100000	105000000	36900000	104000000	113000000	164000000	0.78:1.01:0.35:1.00:1.08:1.57	86850	Protein PAT1 homolog 1 OS=Homo sapiens GN=PATL1 PE=1 SV=2
467	520	P26358|DNMT1_HUMAN	147.5	9	10	10	Deamidation (NQ); Phosphorylation (STY); Carbamidomethylation	350000000	420000000	601000000	475000000	530000000	404000000	360000000	387000000	375000000	791000000	1570000000	461000000	560000000	2510000000	314000000	543000000	604000000	234000000	0.44:0.53:0.76:0.60:0.67:0.51:0.46:0.49:0.47:1.00:1.99:0.58:0.71:3.18:0.40:0.69:0.76:0.30	676000000	469000000	374000000	942000000	2150000000	542000000	0.72:0.50:0.40:1.00:2.29:0.58	183164	DNA (cytosine-5)-methyltransferase 1 OS=Homo sapiens GN=DNMT1 PE=1 SV=2
4177	2907	Q9BRT3|MIEN1_HUMAN	147.5	20	1	1	Acetylation (N-term)	110000000	226000000	124000000	141000000	107000000	157000000	119000000	295000000	176000000	235000000	437000000	255000000	48300000	48800000	47800000	219000000	234000000	235000000	0.47:0.96:0.53:0.60:0.46:0.67:0.51:1.26:0.75:1.00:1.86:1.09:0.21:0.21:0.20:0.94:1.00:1.00	180000000	135000000	197000000	309000000	48300000	230000000	0.58:0.44:0.64:1.00:0.16:0.74	12403	Migration and invasion enhancer 1 OS=Homo sapiens GN=MIEN1 PE=1 SV=1
636	728	Q6JBY9|CPZIP_HUMAN	146.99	36	8	8	Phosphorylation (STY); Acetylation (N-term); Carbamidomethylation	731000000	485000000	615000000	710000000	783000000	439000000	1230000000	1330000000	994000000	920000000	952000000	1020000000	856000000	900000000	533000000	1780000000	1860000000	1860000000	0.79:0.53:0.67:0.77:0.85:0.48:1.34:1.44:1.08:1.00:1.04:1.11:0.93:0.98:0.58:1.94:2.02:2.02	692000000	644000000	1190000000	964000000	805000000	1830000000	0.72:0.67:1.23:1.00:0.84:1.90	44504	CapZ-interacting protein OS=Homo sapiens GN=RCSD1 PE=1 SV=1
1274	1129	P68036|UB2L3_HUMAN	146.99	37	4	4	Carbamidomethylation; Deamidation (NQ)	2630000000	2490000000	1970000000	3020000000	4410000000	2260000000	428000000	1650000000	1140000000	1800000000	3340000000	1120000000	1150000000	2280000000	1290000000	2750000000	2670000000	2210000000	1.46:1.38:1.09:1.68:2.45:1.26:0.24:0.92:0.64:1.00:1.86:0.62:0.64:1.27:0.72:1.53:1.48:1.23	2380000000	3230000000	1080000000	2140000000	1590000000	2540000000	1.11:1.51:0.50:1.00:0.74:1.19	17862	Ubiquitin-conjugating enzyme E2 L3 OS=Homo sapiens GN=UBE2L3 PE=1 SV=1
1657	1851	P11277|SPTB1_HUMAN	146.54	1	2	1		305000000	366000000	1230000000	734000000	283000000	650000000	1140000000	564000000	1620000000	1790000000	658000000	1380000000	315000000	526000000	266000000	746000000	1390000000	689000000	0.17:0.20:0.69:0.41:0.16:0.36:0.64:0.32:0.91:1.00:0.37:0.78:0.18:0.29:0.15:0.42:0.78:0.39	635000000	556000000	1110000000	1280000000	369000000	941000000	0.50:0.44:0.87:1.00:0.29:0.74	246466	Spectrin beta chain erythrocytic OS=Homo sapiens GN=SPTB PE=1 SV=5
858	1250	O00267|SPT5H_HUMAN	146.12	5	3	3	Acetylation (N-term); Phosphorylation (STY)	65800000	121000000	63500000	203000000	217000000	138000000	205000000	153000000	180000000	327000000	260000000	204000000	251000000	148000000	117000000	205000000	393000000	152000000	0.20:0.37:0.19:0.62:0.66:0.42:0.63:0.47:0.55:1.00:0.79:0.62:0.77:0.45:0.36:0.63:1.20:0.47	83400000	220000000	179000000	264000000	172000000	250000000	0.32:0.83:0.68:1.00:0.65:0.95	121000	Transcription elongation factor SPT5 OS=Homo sapiens GN=SUPT5H PE=1 SV=1
1008	544	P00813|ADA_HUMAN	144.77	14	4	4		436000000	308000000	301000000	1070000000	823000000	723000000	555000000	423000000	326000000	822000000	617000000	573000000	767000000	383000000	298000000	891000000	1620000000	604000000	0.53:0.37:0.37:1.30:1.00:0.88:0.68:0.51:0.40:1.00:0.75:0.70:0.93:0.47:0.36:1.08:1.97:0.73	393000000	871000000	435000000	671000000	594000000	1120000000	0.59:1.30:0.65:1.00:0.89:1.67	40764	Adenosine deaminase OS=Homo sapiens GN=ADA PE=1 SV=3
4803	32101	Q8WW12|PCNP_HUMAN	144.49	19	3	3	Phosphorylation (STY)	103000000	17800000	89600000	126000000	168000000	89900000	137000000	135000000	119000000	231000000	37900000	15700000	131000000	91600000	87300000	231000000	275000000	121000000	0.45:0.08:0.39:0.54:0.73:0.39:0.59:0.58:0.52:1.00:0.16:0.07:0.57:0.40:0.38:1.00:1.19:0.52	98500000	128000000	132000000	216000000	103000000	209000000	0.45:0.59:0.61:1.00:0.48:0.97	18925	PEST proteolytic signal-containing nuclear protein OS=Homo sapiens GN=PCNP PE=1 SV=2
238	620	O60763|USO1_HUMAN	143.53	13	9	9	Carbamidomethylation; Acetylation (N-term); Deamidation (NQ)	471000000	415000000	305000000	472000000	489000000	334000000	498000000	592000000	586000000	875000000	815000000	767000000	478000000	715000000	274000000	1350000000	1170000000	1010000000	0.54:0.47:0.35:0.54:0.56:0.38:0.57:0.68:0.67:1.00:0.93:0.88:0.55:0.82:0.31:1.55:1.33:1.16	397000000	432000000	558000000	819000000	494000000	1180000000	0.48:0.53:0.68:1.00:0.60:1.44	107895	General vesicular transport factor p115 OS=Homo sapiens GN=USO1 PE=1 SV=2
808	2308	P51531|SMCA2_HUMAN	143.53	9	9	7	Acetylation (N-term); Phosphorylation (STY)	618000000	178000000	486000000	687000000	389000000	944000000	227000000	256000000	198000000	757000000	300000000	661000000	575000000	368000000	538000000	745000000	819000000	323000000	0.82:0.23:0.64:0.91:0.51:1.25:0.30:0.34:0.26:1.00:0.40:0.87:0.76:0.49:0.71:0.98:1.08:0.43	542000000	673000000	227000000	721000000	632000000	750000000	0.75:0.93:0.31:1.00:0.88:1.04	181278	Probable global transcription activator SNF2L2 OS=Homo sapiens GN=SMARCA2 PE=1 SV=2
430	2127	Q9NR09|BIRC6_HUMAN	143.31	1	4	4	Oxidation (M); Deamidation (NQ)	142000000	129000000	160000000	138000000	111000000	78700000	375000000	276000000	359000000	462000000	286000000	609000000	186000000	163000000	159000000	569000000	659000000	741000000	0.31:0.28:0.35:0.30:0.24:0.17:0.81:0.60:0.78:1.00:0.62:1.32:0.40:0.35:0.34:1.23:1.43:1.60	143000000	126000000	337000000	452000000	169000000	656000000	0.32:0.28:0.74:1.00:0.37:1.45	530260	Baculoviral IAP repeat-containing protein 6 OS=Homo sapiens GN=BIRC6 PE=1 SV=2
5959	23061	O60566|BUB1B_HUMAN	141.62	3	2	2	Carbamidomethylation	137000000	137000000	227000000	242000000	153000000	225000000	257000000	307000000	356000000	313000000	308000000	297000000	112000000	116000000	84100000	186000000	263000000	264000000	0.44:0.44:0.72:0.77:0.49:0.72:0.82:0.98:1.14:1.00:0.98:0.95:0.36:0.37:0.27:0.60:0.84:0.84	167000000	206000000	307000000	306000000	104000000	238000000	0.55:0.68:1.00:1.00:0.34:0.78	119545	Mitotic checkpoint serine/threonine-protein kinase BUB1 beta OS=Homo sapiens GN=BUB1B PE=1 SV=3
690	2029	Q9UKS7|IKZF2_HUMAN	141.22	15	5	4	Carbamidomethylation; Phosphorylation (STY)	112000000	86300000	147000000	115000000	236000000	93700000	60500000	125000000	149000000	255000000	395000000	158000000	187000000	302000000	131000000	588000000	997000000	614000000	0.44:0.34:0.58:0.45:0.93:0.37:0.24:0.49:0.59:1.00:1.55:0.62:0.73:1.18:0.51:2.31:3.91:2.41	115000000	148000000	131000000	270000000	207000000	852000000	0.43:0.55:0.49:1.00:0.77:3.16	59574	Zinc finger protein Helios OS=Homo sapiens GN=IKZF2 PE=1 SV=2
1959	7232	Q9BW92|SYTM_HUMAN	140.97	5	2	2	Acetylation (N-term); Oxidation (HW)	563000000	702000000	310000000	2770000	2130000	911000	12800000	13800000	471000000	27000000	592000000	416000000	0	1090000	0	44700000	835000000	14500000	20.87:26.06:11.51:0.10:0.08:0.03:0.47:0.51:17.49:1.00:21.96:15.44:0:0.04:0:1.66:30.97:0.54	525000000	1940000	476000000	345000000	1090000	431000000	1.52:0.02:1.38:1.00:0.02:1.25	81036	Threonine--tRNA ligase mitochondrial OS=Homo sapiens GN=TARS2 PE=1 SV=1
641	1402	P20290|BTF3_HUMAN	140.74	35	5	5	Deamidation (NQ); Phosphorylation (STY)	319000000	262000000	259000000	317000000	555000000	528000000	242000000	451000000	543000000	624000000	628000000	933000000	1580000000	1400000000	1270000000	416000000	422000000	769000000	0.51:0.42:0.41:0.51:0.89:0.85:0.39:0.72:0.87:1.00:1.01:1.50:2.53:2.24:2.04:0.67:0.68:1.23	354000000	631000000	584000000	1010000000	1580000000	842000000	0.35:0.62:0.58:1.00:1.56:0.83	22168	Transcription factor BTF3 OS=Homo sapiens GN=BTF3 PE=1 SV=1
2816	3841	Q7RTP0|NIPA1_HUMAN	139.13	10	3	3	Acetylation (N-term)	228000000	240000000	85800000	371000000	272000000	162000000	98300000	95500000	82400000	249000000	236000000	112000000	126000000	150000000	75600000	217000000	184000000	85400000	0.92:0.97:0.34:1.49:1.09:0.65:0.39:0.38:0.33:1.00:0.95:0.45:0.51:0.60:0.30:0.87:0.74:0.34	185000000	268000000	103000000	205000000	123000000	172000000	0.90:1.31:0.50:1.00:0.60:0.84	34562	Magnesium transporter NIPA1 OS=Homo sapiens GN=NIPA1 PE=1 SV=1
2313	1800	P82663|RT25_HUMAN	138.61	21	2	2	Carbamidomethylation	292000000	354000000	190000000	339000000	403000000	509000000	425000000	499000000	388000000	501000000	621000000	388000000	638000000	450000000	458000000	888000000	968000000	576000000	0.58:0.71:0.38:0.68:0.80:1.02:0.85:1.00:0.77:1.00:1.24:0.77:1.27:0.90:0.91:1.77:1.93:1.15	305000000	488000000	438000000	503000000	515000000	811000000	0.61:0.97:0.87:1.00:1.02:1.61	20116	28S ribosomal protein S25 mitochondrial OS=Homo sapiens GN=MRPS25 PE=1 SV=1
3602	10487	O95864|FADS2_HUMAN	137.84	13	4	4		85500000	154000000	103000000	100000000	154000000	106000000	189000000	285000000	242000000	313000000	509000000	190000000	190000000	371000000	113000000	571000000	338000000	288000000	0.27:0.49:0.33:0.32:0.49:0.34:0.60:0.91:0.77:1.00:1.63:0.61:0.61:1.18:0.36:1.82:1.08:0.92	168000000	191000000	270000000	337000000	237000000	399000000	0.50:0.57:0.80:1.00:0.70:1.18	52259	Fatty acid desaturase 2 OS=Homo sapiens GN=FADS2 PE=1 SV=1
433	1885	Q9NTJ3|SMC4_HUMAN	137.73	7	7	7	Phosphorylation (STY)	192000000	173000000	156000000	82600000	234000000	57700000	242000000	240000000	231000000	110000000	271000000	68100000	100000000	0	79200000	433000000	353000000	329000000	1.74:1.57:1.42:0.75:2.12:0.52:2.20:2.17:2.10:1.00:2.46:0.62:0.91:0:0.72:3.93:3.20:2.98	174000000	212000000	238000000	266000000	89800000	372000000	0.65:0.80:0.89:1.00:0.34:1.40	147182	Structural maintenance of chromosomes protein 4 OS=Homo sapiens GN=SMC4 PE=1 SV=2
950	1042	O43516|WIPF1_HUMAN	136.9	16	5	5	Carbamidomethylation; Deamidation (NQ)	357000000	282000000	305000000	818000000	961000000	431000000	288000000	345000000	241000000	938000000	791000000	646000000	707000000	756000000	530000000	1060000000	927000000	737000000	0.38:0.30:0.33:0.87:1.02:0.46:0.31:0.37:0.26:1.00:0.84:0.69:0.75:0.81:0.56:1.13:0.99:0.79	352000000	756000000	333000000	794000000	664000000	936000000	0.44:0.95:0.42:1.00:0.84:1.18	51259	WAS/WASL-interacting protein family member 1 OS=Homo sapiens GN=WIPF1 PE=1 SV=3
2130	2026	Q6QNY0|BL1S3_HUMAN	136.62	27	3	3	Citrullination; Phosphorylation (STY)	651000000	525000000	533000000	419000000	483000000	389000000	743000000	1030000000	806000000	1010000000	1270000000	1210000000	294000000	292000000	308000000	1340000000	1140000000	1040000000	0.64:0.52:0.53:0.41:0.48:0.38:0.73:1.02:0.80:1.00:1.25:1.20:0.29:0.29:0.30:1.33:1.13:1.03	570000000	430000000	859000000	1160000000	298000000	1170000000	0.49:0.37:0.74:1.00:0.26:1.01	21256	Biogenesis of lysosome-related organelles complex 1 subunit 3 OS=Homo sapiens GN=BLOC1S3 PE=1 SV=1
2818	2095	O14545|TRAD1_HUMAN	136.62	6	3	3	Phosphorylation (STY); Acetylation (N-term)	79200000	120000000	138000000	206000000	66000000	156000000	307000000	287000000	318000000	354000000	259000000	364000000	279000000	333000000	182000000	700000000	826000000	475000000	0.22:0.34:0.39:0.58:0.19:0.44:0.87:0.81:0.90:1.00:0.73:1.03:0.79:0.94:0.51:1.98:2.34:1.34	113000000	143000000	304000000	326000000	265000000	668000000	0.35:0.44:0.93:1.00:0.81:2.05	64841	TRAF-type zinc finger domain-containing protein 1 OS=Homo sapiens GN=TRAFD1 PE=1 SV=1
1991	2870	P41223|BUD31_HUMAN	136.28	34	4	4	Carbamidomethylation; Acetylation (N-term); Deamidation (NQ); Pyro-glu from Q	147000000	190000000	119000000	251000000	277000000	271000000	325000000	376000000	212000000	327000000	363000000	252000000	435000000	525000000	353000000	506000000	322000000	431000000	0.45:0.58:0.36:0.77:0.85:0.83:0.99:1.15:0.65:1.00:1.11:0.77:1.33:1.61:1.08:1.55:0.98:1.32	152000000	276000000	304000000	314000000	458000000	420000000	0.48:0.88:0.97:1.00:1.46:1.34	17000	Protein BUD31 homolog OS=Homo sapiens GN=BUD31 PE=1 SV=2
1602	1945	Q99614|TTC1_HUMAN	130.95	11	3	3	Carbamidomethylation	178000000	201000000	150000000	306000000	394000000	262000000	154000000	180000000	159000000	222000000	244000000	137000000	294000000	281000000	234000000	625000000	489000000	377000000	0.81:0.91:0.68:1.38:1.78:1.18:0.69:0.81:0.72:1.00:1.10:0.62:1.33:1.27:1.06:2.82:2.21:1.70	176000000	325000000	164000000	213000000	276000000	982000000	0.83:1.53:0.77:1.00:1.30:4.62	33526	Tetratricopeptide repeat protein 1 OS=Homo sapiens GN=TTC1 PE=1 SV=1
955	1089	Q9ULA0|DNPEP_HUMAN	130.49	18	5	5	Carbamidomethylation	633000000	801000000	504000000	1240000000	1190000000	826000000	439000000	540000000	182000000	776000000	1220000000	516000000	654000000	766000000	437000000	707000000	1320000000	608000000	0.82:1.03:0.65:1.60:1.54:1.06:0.57:0.70:0.23:1.00:1.57:0.67:0.84:0.99:0.56:0.91:1.71:0.78	646000000	1090000000	483000000	838000000	619000000	880000000	0.77:1.30:0.58:1.00:0.74:1.05	52428	Aspartyl aminopeptidase OS=Homo sapiens GN=DNPEP PE=1 SV=1
1126	681	P62244|RS15A_HUMAN	128.34	46	7	7	Carbamidomethylation; Pyro-glu from Q	452000000	568000000	304000000	2390000000	507000000	839000000	574000000	262000000	495000000	2920000000	1060000000	1780000000	1050000000	291000000	139000000	1050000000	2160000000	482000000	0.15:0.19:0.10:0.82:0.17:0.29:0.20:0.09:0.17:1.00:0.36:0.61:0.36:0.10:0.05:0.36:0.74:0.17	492000000	1660000000	443000000	1920000000	983000000	1410000000	0.26:0.87:0.23:1.00:0.51:0.73	14840	40S ribosomal protein S15a OS=Homo sapiens GN=RPS15A PE=1 SV=2
971	1202	Q5UIP0|RIF1_HUMAN	126.75	2	3	3	Carbamidomethylation	186000000	173000000	206000000	115000000	253000000	177000000	220000000	218000000	183000000	293000000	299000000	253000000	197000000	199000000	80700000	635000000	505000000	423000000	0.64:0.59:0.70:0.39:0.86:0.60:0.75:0.74:0.62:1.00:1.02:0.86:0.67:0.68:0.28:2.16:1.72:1.44	202000000	216000000	207000000	282000000	169000000	521000000	0.72:0.77:0.73:1.00:0.60:1.85	274464	Telomere-associated protein RIF1 OS=Homo sapiens GN=RIF1 PE=1 SV=2
1973	2155	Q00796|DHSO_HUMAN	126.04	10	2	2	Acetylation (N-term)	555000000	821000000	646000000	954000000	1170000000	775000000	440000000	371000000	241000000	395000000	683000000	422000000	479000000	560000000	275000000	1270000000	912000000	1010000000	1.41:2.08:1.64:2.42:2.97:1.96:1.12:0.94:0.61:1.00:1.73:1.07:1.21:1.42:0.70:3.21:2.31:2.57	755000000	968000000	514000000	500000000	500000000	1060000000	1.51:1.94:1.03:1.00:1.00:2.13	38325	Sorbitol dehydrogenase OS=Homo sapiens GN=SORD PE=1 SV=4
2846	1471	P49458|SRP09_HUMAN	125.2	26	2	2	Carbamidomethylation	2290000000	1950000000	1620000000	2970000000	3450000000	2250000000	1120000000	1250000000	777000000	1920000000	2160000000	1570000000	1560000000	1470000000	1170000000	2740000000	2460000000	758000000	1.20:1.02:0.85:1.55:1.80:1.17:0.59:0.65:0.41:1.00:1.13:0.82:0.81:0.77:0.61:1.43:1.28:0.40	1950000000	2890000000	1180000000	1910000000	1510000000	2520000000	1.02:1.51:0.62:1.00:0.79:1.32	10112	Signal recognition particle 9 kDa protein OS=Homo sapiens GN=SRP9 PE=1 SV=2
1532	1775	O43169|CYB5B_HUMAN	124.95	21	2	2	Acetylation (N-term); Deamidation (NQ); Oxidation (HW); Pyro-glu from Q	811000000	551000000	573000000	1220000000	1110000000	810000000	292000000	733000000	571000000	1460000000	1270000000	1330000000	1160000000	1610000000	824000000	2130000000	1720000000	1470000000	0.55:0.38:0.39:0.83:0.76:0.55:0.20:0.50:0.39:1.00:0.87:0.91:0.79:1.10:0.56:1.45:1.18:1.00	694000000	1050000000	550000000	1470000000	1200000000	1840000000	0.47:0.71:0.37:1.00:0.81:1.25	16332	Cytochrome b5 type B OS=Homo sapiens GN=CYB5B PE=1 SV=2
757	871	P80723|BASP1_HUMAN	124.83	42	6	6	Acetylation (N-term); Deamidation (NQ)	347000000	325000000	269000000	944000000	812000000	763000000	396000000	503000000	447000000	1310000000	1450000000	1210000000	590000000	760000000	617000000	864000000	915000000	803000000	0.26:0.25:0.21:0.72:0.62:0.58:0.30:0.38:0.34:1.00:1.10:0.92:0.45:0.58:0.47:0.66:0.70:0.61	314000000	840000000	449000000	1320000000	656000000	861000000	0.24:0.64:0.34:1.00:0.50:0.65	22693	Brain acid soluble protein 1 OS=Homo sapiens GN=BASP1 PE=1 SV=2
222	217	P53634|CATC_HUMAN	124.82	42	23	23	Carbamidomethylation; Deamidation (NQ); Phosphorylation (STY); Acetylation (N-term); Oxidation (M)	4560000000	4690000000	4240000000	6050000000	8850000000	4880000000	2480000000	2780000000	1950000000	3880000000	5520000000	2520000000	3520000000	3920000000	2840000000	6770000000	5810000000	3620000000	1.18:1.21:1.09:1.56:2.28:1.26:0.64:0.72:0.50:1.00:1.42:0.65:0.91:1.01:0.73:1.75:1.50:0.93	4510000000	6590000000	2440000000	4080000000	3460000000	5450000000	1.11:1.62:0.60:1.00:0.85:1.34	51854	Dipeptidyl peptidase 1 OS=Homo sapiens GN=CTSC PE=1 SV=2
1361	1157	Q9P2N5|RBM27_HUMAN	124.37	5	4	4	Deamidation (NQ); Phosphorylation (STY); Acetylation (N-term)	303000000	248000000	244000000	310000000	261000000	228000000	554000000	482000000	340000000	717000000	669000000	358000000	251000000	377000000	204000000	838000000	821000000	522000000	0.42:0.35:0.34:0.43:0.36:0.32:0.77:0.67:0.47:1.00:0.93:0.50:0.35:0.53:0.28:1.17:1.14:0.73	265000000	266000000	458000000	581000000	277000000	792000000	0.46:0.46:0.79:1.00:0.48:1.36	118718	RNA-binding protein 27 OS=Homo sapiens GN=RBM27 PE=1 SV=2
2162	2165	O76071|CIAO1_HUMAN	124.04	15	3	3	Carbamidomethylation	232000000	192000000	215000000	529000000	738000000	449000000	295000000	473000000	315000000	287000000	596000000	247000000	480000000	673000000	455000000	873000000	556000000	625000000	0.81:0.67:0.75:1.84:2.57:1.56:1.03:1.65:1.10:1.00:2.08:0.86:1.67:2.35:1.59:3.04:1.94:2.18	238000000	572000000	361000000	496000000	536000000	685000000	0.48:1.15:0.73:1.00:1.08:1.38	37840	Probable cytosolic iron-sulfur protein assembly protein CIAO1 OS=Homo sapiens GN=CIAO1 PE=1 SV=1
2004	1365	P30043|BLVRB_HUMAN	124	33	4	4	Carbamidomethylation	230000000	536000000	343000000	973000000	872000000	761000000	262000000	417000000	274000000	673000000	479000000	358000000	629000000	433000000	391000000	770000000	1140000000	562000000	0.34:0.80:0.51:1.44:1.29:1.13:0.39:0.62:0.41:1.00:0.71:0.53:0.93:0.64:0.58:1.14:1.69:0.84	531000000	869000000	346000000	585000000	484000000	824000000	0.91:1.48:0.59:1.00:0.83:1.41	22119	Flavin reductase (NADPH) OS=Homo sapiens GN=BLVRB PE=1 SV=3
2326	2078	Q9GZU8|F192A_HUMAN	123.54	21	4	4	Carbamidomethylation; Acetylation (N-term)	271000000	268000000	284000000	405000000	602000000	295000000	144000000	103000000	229000000	423000000	593000000	266000000	134000000	438000000	221000000	923000000	674000000	522000000	0.64:0.63:0.67:0.96:1.42:0.70:0.34:0.24:0.54:1.00:1.40:0.63:0.32:1.03:0.52:2.18:1.59:1.23	274000000	434000000	211000000	428000000	311000000	706000000	0.64:1.01:0.49:1.00:0.73:1.65	28912	Protein FAM192A OS=Homo sapiens GN=FAM192A PE=1 SV=1
1284	1649	P55011|S12A2_HUMAN	123.51	3	2	2		72600000	141000000	131000000	245000000	59900000	123000000	249000000	228000000	172000000	282000000	298000000	196000000	182000000	244000000	139000000	314000000	364000000	262000000	0.26:0.50:0.46:0.87:0.21:0.44:0.88:0.81:0.61:1.00:1.06:0.69:0.65:0.86:0.49:1.11:1.29:0.93	136000000	178000000	216000000	258000000	188000000	313000000	0.53:0.69:0.84:1.00:0.73:1.21	131447	Solute carrier family 12 member 2 OS=Homo sapiens GN=SLC12A2 PE=1 SV=1
1132	11553	O00763|ACACB_HUMAN	122.22	5	7	3	Acetylation (N-term); Oxidation (M); Deamidation (NQ); Phosphorylation (STY); Citrullination; Oxidation (HW)	835000000	119000000	422000000	3320000000	96200000	2370000000	599000000	1140000000	387000000	2280000000	1200000000	1340000000	176000000	929000000	703000000	703000000	761000000	325000000	0.37:0.05:0.19:1.46:0.04:1.04:0.26:0.50:0.17:1.00:0.53:0.59:0.08:0.41:0.31:0.31:0.33:0.14	638000000	2840000000	710000000	1610000000	603000000	596000000	0.40:1.77:0.44:1.00:0.37:0.37	276539	Acetyl-CoA carboxylase 2 OS=Homo sapiens GN=ACACB PE=1 SV=3
1131	1082	P62633|CNBP_HUMAN	121.26	35	6	6	Carbamidomethylation; Acetylation (N-term); Deamidation (NQ)	970000000	933000000	726000000	1820000000	1750000000	1700000000	766000000	601000000	585000000	1230000000	1370000000	1350000000	763000000	1090000000	628000000	3110000000	2090000000	1310000000	0.79:0.76:0.59:1.48:1.42:1.38:0.62:0.49:0.48:1.00:1.11:1.10:0.62:0.88:0.51:2.52:1.70:1.06	876000000	1760000000	651000000	1320000000	829000000	2210000000	0.66:1.33:0.49:1.00:0.63:1.67	19463	Cellular nucleic acid-binding protein OS=Homo sapiens GN=CNBP PE=1 SV=1
2063	1565	P49585|PCY1A_HUMAN	121.1	19	5	3	Carbamidomethylation; Phosphorylation (STY); Deamidation (NQ)	94500000	125000000	47700000	103000000	81900000	105000000	97600000	190000000	75100000	225000000	145000000	138000000	169000000	105000000	103000000	219000000	336000000	166000000	0.42:0.55:0.21:0.46:0.36:0.47:0.43:0.84:0.33:1.00:0.64:0.61:0.75:0.47:0.46:0.97:1.49:0.74	89100000	96800000	121000000	170000000	125000000	240000000	0.52:0.57:0.71:1.00:0.74:1.42	41731	Choline-phosphate cytidylyltransferase A OS=Homo sapiens GN=PCYT1A PE=1 SV=2
1599	1346	Q00688|FKBP3_HUMAN	120.99	13	3	3		263000000	851000000	610000000	368000000	1030000000	523000000	866000000	810000000	642000000	440000000	534000000	521000000	445000000	176000000	238000000	1220000000	1290000000	404000000	0.60:1.93:1.39:0.84:2.34:1.19:1.97:1.84:1.46:1.00:1.21:1.19:1.01:0.40:0.54:2.76:2.94:0.92	715000000	782000000	778000000	685000000	360000000	1210000000	1.04:1.14:1.14:1.00:0.53:1.77	25177	Peptidyl-prolyl cis-trans isomerase FKBP3 OS=Homo sapiens GN=FKBP3 PE=1 SV=1
1851	1786	Q9H832|UBE2Z_HUMAN	120.58	19	4	4	Oxidation (M)	312000000	310000000	160000000	499000000	415000000	322000000	378000000	493000000	300000000	631000000	444000000	427000000	817000000	805000000	485000000	543000000	481000000	369000000	0.50:0.49:0.25:0.79:0.66:0.51:0.60:0.78:0.48:1.00:0.70:0.68:1.30:1.28:0.77:0.86:0.76:0.58	261000000	412000000	390000000	500000000	702000000	464000000	0.52:0.82:0.78:1.00:1.40:0.93	38210	Ubiquitin-conjugating enzyme E2 Z OS=Homo sapiens GN=UBE2Z PE=1 SV=2
1137	1604	O60271|JIP4_HUMAN	120.31	6	5	5	Citrullination; Phosphorylation (STY)	123000000	45000000	174000000	103000000	101000000	188000000	84300000	110000000	209000000	153000000	158000000	256000000	76500000	70800000	117000000	238000000	249000000	504000000	0.81:0.29:1.14:0.67:0.66:1.23:0.55:0.72:1.37:1.00:1.04:1.68:0.50:0.46:0.77:1.56:1.63:3.30	195000000	211000000	222000000	334000000	131000000	584000000	0.58:0.63:0.66:1.00:0.39:1.75	146205	C-Jun-amino-terminal kinase-interacting protein 4 OS=Homo sapiens GN=SPAG9 PE=1 SV=4
670	772	P28070|PSB4_HUMAN	119.16	30	5	5	Acetylation (N-term); Deamidation (NQ); Pyro-glu from Q	2740000000	1230000000	2240000000	3260000000	2970000000	3070000000	14100000000	6190000000	4620000000	3440000000	2660000000	2770000000	2720000000	2770000000	1900000000	1370000000	1350000000	1280000000	0.80:0.36:0.65:0.95:0.86:0.89:4.10:1.80:1.34:1.00:0.77:0.81:0.79:0.81:0.55:0.40:0.39:0.37	2070000000	3100000000	8300000000	2960000000	2470000000	1330000000	0.70:1.05:2.81:1.00:0.84:0.45	29204	Proteasome subunit beta type-4 OS=Homo sapiens GN=PSMB4 PE=1 SV=4
2466	1947	Q01650|LAT1_HUMAN	118.32	2	1	1		74400000	89800000	186000000	88600000	50800000	83500000	242000000	125000000	227000000	408000000	166000000	187000000	99600000	151000000	68900000	144000000	293000000	79500000	0.18:0.22:0.46:0.22:0.12:0.20:0.59:0.31:0.56:1.00:0.41:0.46:0.24:0.37:0.17:0.35:0.72:0.19	117000000	74300000	198000000	254000000	107000000	172000000	0.46:0.29:0.78:1.00:0.42:0.68	55010	Large neutral amino acids transporter small subunit 1 OS=Homo sapiens GN=SLC7A5 PE=1 SV=2
1910	4126	Q9UPA5|BSN_HUMAN	118.24	1	2	2	Carbamidomethylation; Deamidation (NQ); Phosphorylation (STY)	78800000	89800000	78500000	89100000	66800000	981000	238000000	207000000	253000000	426000000	268000000	406000000	88400000	122000000	33300000	769000000	820000000	485000000	0.19:0.21:0.18:0.21:0.16:0.02:0.56:0.49:0.59:1.00:0.63:0.95:0.21:0.29:0.08:1.81:1.93:1.14	82400000	78500000	233000000	367000000	81300000	691000000	0.22:0.21:0.63:1.00:0.22:1.89	416475	Protein bassoon OS=Homo sapiens GN=BSN PE=1 SV=4
1815	1826	Q13363|CTBP1_HUMAN	117.78	11	3	3	Carbamidomethylation	176000000	141000000	119000000	159000000	206000000	165000000	207000000	197000000	184000000	305000000	442000000	270000000	102000000	313000000	183000000	431000000	214000000	517000000	0.58:0.46:0.39:0.52:0.67:0.54:0.68:0.65:0.60:1.00:1.45:0.89:0.34:1.03:0.60:1.41:0.70:1.70	145000000	199000000	196000000	339000000	199000000	454000000	0.43:0.59:0.58:1.00:0.59:1.34	47535	C-terminal-binding protein 1 OS=Homo sapiens GN=CTBP1 PE=1 SV=2
1195	2809	Q15370|ELOB_HUMAN	117.74	43	6	5	Carbamidomethylation; Acetylation (N-term); Deamidation (NQ)	474000000	425000000	403000000	1010000000	1140000000	779000000	720000000	683000000	568000000	1340000000	1140000000	839000000	713000000	752000000	510000000	883000000	1570000000	1010000000	0.35:0.32:0.30:0.76:0.85:0.58:0.54:0.51:0.42:1.00:0.85:0.63:0.53:0.56:0.38:0.66:1.18:0.75	434000000	977000000	657000000	1180000000	673000000	1160000000	0.37:0.83:0.56:1.00:0.57:0.98	13133	Transcription elongation factor B polypeptide 2 OS=Homo sapiens GN=TCEB2 PE=1 SV=1
838	915	P01834|IGKC_HUMAN	117.64	67	7	7	Carbamidomethylation; Acetylation (N-term); Deamidation (NQ)	3280000000	3130000000	2740000000	6270000000	5260000000	5030000000	3290000000	3960000000	3680000000	5130000000	4600000000	4240000000	4650000000	4740000000	3410000000	8500000000	8630000000	7190000000	0.64:0.61:0.53:1.22:1.03:0.98:0.64:0.77:0.72:1.00:0.90:0.83:0.91:0.92:0.66:1.66:1.68:1.40	3050000000	5520000000	3640000000	4660000000	4290000000	8110000000	0.65:1.18:0.78:1.00:0.92:1.74	11609	Ig kappa chain C region OS=Homo sapiens GN=IGKC PE=1 SV=1
354	409	O76094|SRP72_HUMAN	117.52	16	8	8	Carbamidomethylation; Acetylation (N-term); Pyro-glu from Q; Deamidation (NQ)	475000000	533000000	358000000	701000000	948000000	515000000	545000000	856000000	593000000	1610000000	1890000000	1200000000	1450000000	1210000000	974000000	1020000000	1020000000	667000000	0.29:0.33:0.22:0.43:0.59:0.32:0.34:0.53:0.37:1.00:1.17:0.74:0.90:0.75:0.60:0.63:0.63:0.41	455000000	721000000	682000000	1570000000	1210000000	902000000	0.29:0.46:0.43:1.00:0.77:0.58	74606	Signal recognition particle subunit SRP72 OS=Homo sapiens GN=SRP72 PE=1 SV=3
1185	2065	O60884|DNJA2_HUMAN	115.75	18	4	4	Carbamidomethylation; Citrullination	255000000	327000000	253000000	391000000	390000000	351000000	639000000	695000000	596000000	610000000	598000000	543000000	523000000	524000000	397000000	783000000	785000000	633000000	0.42:0.54:0.41:0.64:0.64:0.57:1.05:1.14:0.98:1.00:0.98:0.89:0.86:0.86:0.65:1.28:1.29:1.04	278000000	377000000	643000000	584000000	481000000	734000000	0.48:0.65:1.10:1.00:0.82:1.26	45746	DnaJ homolog subfamily A member 2 OS=Homo sapiens GN=DNAJA2 PE=1 SV=1
3616	2168	Q99720|SGMR1_HUMAN	115.37	15	3	3	Pyro-glu from Q	208000000	211000000	143000000	665000000	592000000	363000000	162000000	448000000	272000000	165000000	0	131000000	481000000	741000000	259000000	158000000	403000000	48000000	1.26:1.29:0.87:4.04:3.60:2.20:0.99:2.72:1.66:1.00:0:0.80:2.92:4.51:1.57:0.96:2.45:0.29	242000000	540000000	328000000	148000000	494000000	491000000	1.64:3.65:2.22:1.00:3.34:3.32	25128	Sigma non-opioid intracellular receptor 1 OS=Homo sapiens GN=SIGMAR1 PE=1 SV=1
1324	1111	Q86WB0|NIPA_HUMAN	115.31	13	4	4	Carbamidomethylation; Pyro-glu from Q; Acetylation (N-term); Phosphorylation (STY)	168000000	128000000	79900000	91400000	139000000	81500000	144000000	196000000	139000000	178000000	253000000	160000000	64300000	61000000	56600000	343000000	234000000	229000000	0.94:0.72:0.45:0.51:0.78:0.46:0.81:1.10:0.78:1.00:1.42:0.90:0.36:0.34:0.32:1.92:1.31:1.28	126000000	104000000	160000000	197000000	60600000	269000000	0.64:0.53:0.81:1.00:0.31:1.36	55262	Nuclear-interacting partner of ALK OS=Homo sapiens GN=ZC3HC1 PE=1 SV=1
1365	14263	O60826|CCD22_HUMAN	115.08	7	3	3	Acetylation (N-term)	92200000	131000000	70000000	178000000	116000000	130000000	189000000	238000000	140000000	210000000	173000000	207000000	170000000	137000000	152000000	238000000	292000000	239000000	0.44:0.62:0.33:0.85:0.55:0.62:0.90:1.13:0.67:1.00:0.82:0.99:0.81:0.65:0.72:1.14:1.39:1.14	97600000	141000000	189000000	197000000	153000000	257000000	0.50:0.72:0.96:1.00:0.78:1.31	70756	Coiled-coil domain-containing protein 22 OS=Homo sapiens GN=CCDC22 PE=1 SV=1
5691	2143	P09669|COX6C_HUMAN	114.72	25	2	2		239000000	333000000	96100000	255000000	170000000	187000000	103000000	190000000	87400000	105000000	84400000	56500000	108000000	79400000	67300000	241000000	342000000	162000000	2.28:3.18:0.92:2.44:1.63:1.79:0.99:1.81:0.83:1.00:0.81:0.54:1.03:0.76:0.64:2.30:3.26:1.55	223000000	204000000	127000000	81900000	84800000	248000000	2.72:2.50:1.55:1.00:1.04:3.03	8781	Cytochrome c oxidase subunit 6C OS=Homo sapiens GN=COX6C PE=1 SV=2
1461	1664	Q5T8P6|RBM26_HUMAN	114.69	8	7	7	Carbamidomethylation; Phosphorylation (STY)	224000000	238000000	194000000	337000000	291000000	243000000	303000000	304000000	237000000	402000000	426000000	309000000	308000000	300000000	249000000	661000000	624000000	437000000	0.56:0.59:0.48:0.84:0.72:0.60:0.75:0.76:0.59:1.00:1.06:0.77:0.77:0.75:0.62:1.64:1.55:1.09	219000000	290000000	281000000	379000000	286000000	574000000	0.58:0.77:0.74:1.00:0.75:1.51	113597	RNA-binding protein 26 OS=Homo sapiens GN=RBM26 PE=1 SV=3
4875	1525	Q9NRP0|OSTC_HUMAN	113.45	17	3	3	Carbamidomethylation; Acetylation (N-term)	562000000	517000000	593000000	542000000	594000000	492000000	1200000000	831000000	1020000000	1330000000	989000000	1240000000	507000000	545000000	369000000	1380000000	1650000000	1330000000	0.42:0.39:0.45:0.41:0.45:0.37:0.90:0.62:0.77:1.00:0.74:0.93:0.38:0.41:0.28:1.04:1.24:1.00	557000000	543000000	1010000000	1190000000	478000000	1450000000	0.47:0.46:0.86:1.00:0.40:1.23	16829	Oligosaccharyltransferase complex subunit OSTC OS=Homo sapiens GN=OSTC PE=1 SV=1
1447	1488	Q9H3N1|TMX1_HUMAN	112.96	21	7	7	Phosphorylation (STY); Carbamidomethylation; Deamidation (NQ)	177000000	155000000	95900000	208000000	279000000	135000000	344000000	393000000	384000000	544000000	479000000	328000000	405000000	395000000	243000000	618000000	589000000	365000000	0.32:0.28:0.18:0.38:0.51:0.25:0.63:0.72:0.71:1.00:0.88:0.60:0.74:0.73:0.45:1.14:1.08:0.67	142000000	207000000	374000000	450000000	348000000	524000000	0.32:0.46:0.83:1.00:0.77:1.16	31791	Thioredoxin-related transmembrane protein 1 OS=Homo sapiens GN=TMX1 PE=1 SV=1
1314	1524	Q7Z3B4|NUP54_HUMAN	112.22	11	4	4		190000000	248000000	137000000	290000000	227000000	278000000	459000000	274000000	300000000	395000000	476000000	288000000	292000000	335000000	174000000	538000000	501000000	453000000	0.48:0.63:0.35:0.73:0.58:0.70:1.16:0.69:0.76:1.00:1.20:0.73:0.74:0.85:0.44:1.36:1.27:1.15	238000000	394000000	344000000	419000000	305000000	497000000	0.57:0.94:0.82:1.00:0.73:1.19	55436	Nucleoporin p54 OS=Homo sapiens GN=NUP54 PE=1 SV=2
4113	3111	Q9Y547|IFT25_HUMAN	111.8	10	2	2		164000000	183000000	128000000	278000000	317000000	196000000	288000000	277000000	229000000	346000000	347000000	259000000	320000000	316000000	222000000	421000000	492000000	318000000	0.48:0.53:0.37:0.80:0.92:0.57:0.83:0.80:0.66:1.00:1.00:0.75:0.92:0.91:0.64:1.22:1.42:0.92	158000000	263000000	265000000	317000000	286000000	410000000	0.50:0.83:0.83:1.00:0.90:1.29	16297	Intraflagellar transport protein 25 homolog OS=Homo sapiens GN=HSPB11 PE=1 SV=1
498	792	B0I1T2|MYO1G_HUMAN	111.56	14	11	11	Oxidation (HW); Carbamidomethylation; Deamidation (NQ); Citrullination	1980000000	505000000	1370000000	339000000	449000000	194000000	422000000	516000000	1600000000	429000000	279000000	210000000	2330000000	458000000	297000000	2850000000	461000000	282000000	4.63:1.18:3.20:0.79:1.05:0.45:0.98:1.20:3.74:1.00:0.65:0.49:5.44:1.07:0.69:6.66:1.08:0.66	1730000000	362000000	1700000000	306000000	1030000000	2780000000	5.67:1.19:5.58:1.00:3.37:9.11	116442	Unconventional myosin-Ig OS=Homo sapiens GN=MYO1G PE=1 SV=2
2813	2761	P17900|SAP3_HUMAN	111.36	18	3	3	Carbamidomethylation	318000000	433000000	191000000	549000000	535000000	376000000	68900000	16100000	228000000	535000000	438000000	396000000	114000000	111000000	100000000	453000000	386000000	218000000	0.59:0.81:0.36:1.02:1.00:0.70:0.13:0.03:0.43:1.00:0.82:0.74:0.21:0.21:0.19:0.85:0.72:0.41	321000000	516000000	264000000	456000000	119000000	395000000	0.70:1.13:0.58:1.00:0.26:0.87	20838	Ganglioside GM2 activator OS=Homo sapiens GN=GM2A PE=1 SV=4
1915	6723	O60716|CTND1_HUMAN	108.42	5	3	3	Carbamidomethylation	58300000	86300000	25800000	174000000	85600000	115000000	94200000	106000000	35400000	176000000	108000000	114000000	48200000	43300000	40500000	115000000	251000000	73400000	0.33:0.49:0.15:0.99:0.49:0.66:0.54:0.60:0.20:1.00:0.61:0.65:0.27:0.25:0.23:0.65:1.43:0.42	56800000	126000000	87400000	133000000	47800000	146000000	0.43:0.95:0.66:1.00:0.36:1.10	108170	Catenin delta-1 OS=Homo sapiens GN=CTNND1 PE=1 SV=1
201	142	O75153|CLU_HUMAN	108.38	21	20	19	Pyro-glu from Q; Carbamidomethylation; Acetylation (N-term); Phosphorylation (STY); Deamidation (NQ)	2670000000	2750000000	1860000000	575000000	1980000000	303000000	1510000000	1750000000	1480000000	832000000	1020000000	1600000000	1640000000	905000000	803000000	810000000	1140000000	901000000	3.21:3.31:2.23:0.69:2.38:0.36:1.81:2.10:1.78:1.00:1.22:1.92:1.97:1.09:0.97:0.97:1.37:1.08	2430000000	1190000000	1580000000	1800000000	1280000000	1340000000	1.35:0.66:0.88:1.00:0.71:0.75	146669	Clustered mitochondria protein homolog OS=Homo sapiens GN=CLUH PE=1 SV=2
1342	1192	P63208|SKP1_HUMAN	108.23	33	4	4	Deamidation (NQ)	1500000000	1390000000	1230000000	2640000000	2320000000	2000000000	1940000000	1710000000	1590000000	2270000000	2230000000	1800000000	1670000000	1670000000	1280000000	3550000000	4040000000	2930000000	0.66:0.61:0.54:1.16:1.02:0.88:0.85:0.75:0.70:1.00:0.98:0.79:0.74:0.73:0.56:1.56:1.78:1.29	1380000000	2330000000	1790000000	2100000000	1540000000	3580000000	0.65:1.11:0.85:1.00:0.73:1.70	18658	S-phase kinase-associated protein 1 OS=Homo sapiens GN=SKP1 PE=1 SV=2
1921	3122	Q5SW79|CE170_HUMAN	107.81	4	4	4	Deamidation (NQ); Oxidation (HW)	210000000	190000000	118000000	334000000	370000000	274000000	120000000	160000000	104000000	420000000	318000000	46000000	104000000	213000000	128000000	261000000	509000000	286000000	0.50:0.45:0.28:0.80:0.88:0.65:0.29:0.38:0.25:1.00:0.76:0.11:0.25:0.51:0.31:0.62:1.21:0.68	173000000	326000000	128000000	363000000	148000000	352000000	0.48:0.90:0.35:1.00:0.41:0.97	175292	Centrosomal protein of 170 kDa OS=Homo sapiens GN=CEP170 PE=1 SV=1
1684	1742	P13861|KAP2_HUMAN	107.67	15	4	4	Carbamidomethylation; Phosphorylation (STY)	76700000	91900000	87800000	88500000	132000000	95900000	275000000	139000000	197000000	134000000	180000000	136000000	104000000	111000000	127000000	228000000	228000000	196000000	0.57:0.69:0.66:0.66:0.98:0.72:2.06:1.03:1.47:1.00:1.34:1.02:0.78:0.83:0.95:1.70:1.70:1.47	86800000	112000000	203000000	150000000	114000000	217000000	0.58:0.75:1.36:1.00:0.76:1.45	45518	cAMP-dependent protein kinase type II-alpha regulatory subunit OS=Homo sapiens GN=PRKAR2A PE=1 SV=2
2925	1521	Q9UBM7|DHCR7_HUMAN	107.53	9	3	3	Carbamidomethylation	832000000	721000000	326000000	952000000	811000000	698000000	1080000000	1290000000	805000000	1310000000	1780000000	1150000000	1740000000	1780000000	1250000000	1320000000	1200000000	1150000000	0.64:0.55:0.25:0.73:0.62:0.53:0.82:0.99:0.62:1.00:1.36:0.88:1.33:1.36:0.96:1.01:0.92:0.88	626000000	820000000	1060000000	1410000000	1590000000	1220000000	0.44:0.58:0.75:1.00:1.13:0.87	54489	7-dehydrocholesterol reductase OS=Homo sapiens GN=DHCR7 PE=1 SV=1
293	392	Q8TEM1|PO210_HUMAN	107.5	13	15	15	Carbamidomethylation; Deamidation (NQ)	490000000	2040000000	433000000	2150000000	943000000	572000000	1490000000	682000000	466000000	1640000000	2400000000	1470000000	464000000	2410000000	1730000000	2480000000	2220000000	2820000000	0.30:1.25:0.26:1.31:0.58:0.35:0.91:0.42:0.28:1.00:1.46:0.90:0.28:1.47:1.06:1.51:1.36:1.72	2030000000	2240000000	1090000000	1830000000	1970000000	2510000000	1.11:1.22:0.59:1.00:1.08:1.37	205109	Nuclear pore membrane glycoprotein 210 OS=Homo sapiens GN=NUP210 PE=1 SV=3
788	499	Q9Y277|VDAC3_HUMAN	107.34	30	7	5	Carbamidomethylation; Acetylation (N-term)	386000000	505000000	781000000	989000000	666000000	848000000	1130000000	1250000000	1090000000	1620000000	867000000	990000000	911000000	650000000	671000000	1500000000	1320000000	1430000000	0.24:0.31:0.48:0.61:0.41:0.52:0.70:0.77:0.68:1.00:0.54:0.61:0.56:0.40:0.41:0.93:0.82:0.88	658000000	899000000	1160000000	1260000000	832000000	1600000000	0.52:0.71:0.92:1.00:0.66:1.27	30659	Voltage-dependent anion-selective channel protein 3 OS=Homo sapiens GN=VDAC3 PE=1 SV=1
956	807	P09525|ANXA4_HUMAN	107.3	27	9	7	Carbamidomethylation; Acetylation (N-term); Deamidation (NQ); Pyro-glu from Q	425000000	351000000	183000000	361000000	518000000	218000000	498000000	610000000	384000000	499000000	531000000	249000000	585000000	589000000	280000000	1040000000	979000000	414000000	0.85:0.70:0.37:0.72:1.04:0.44:1.00:1.22:0.77:1.00:1.06:0.50:1.17:1.18:0.56:2.09:1.96:0.83	341000000	384000000	497000000	426000000	485000000	812000000	0.80:0.90:1.17:1.00:1.14:1.90	35883	Annexin A4 OS=Homo sapiens GN=ANXA4 PE=1 SV=4
941	1058	Q07666|KHDR1_HUMAN	107.11	18	6	5	Acetylation (N-term); Deamidation (NQ); Citrullination	71400000	90800000	40200000	156000000	123000000	435000000	167000000	213000000	117000000	285000000	192000000	302000000	206000000	201000000	121000000	167000000	348000000	189000000	0.25:0.32:0.14:0.55:0.43:1.53:0.59:0.75:0.41:1.00:0.67:1.06:0.72:0.71:0.42:0.59:1.22:0.66	67400000	505000000	166000000	340000000	176000000	235000000	0.20:1.48:0.49:1.00:0.52:0.69	48227	KH domain-containing RNA-binding signal transduction-associated protein 1 OS=Homo sapiens GN=KHDRBS1 PE=1 SV=1
1873	1329	P46776|RL27A_HUMAN	106.29	34	5	5	Carbamidomethylation; Deamidation (NQ)	2320000000	2560000000	2610000000	3540000000	3150000000	3330000000	2980000000	2170000000	2730000000	7270000000	6090000000	7130000000	2940000000	2730000000	2140000000	6450000000	6860000000	5570000000	0.32:0.35:0.36:0.49:0.43:0.46:0.41:0.30:0.38:1.00:0.84:0.98:0.40:0.38:0.29:0.89:0.94:0.77	2510000000	3340000000	3370000000	6860000000	2820000000	6290000000	0.37:0.49:0.49:1.00:0.41:0.92	16561	60S ribosomal protein L27a OS=Homo sapiens GN=RPL27A PE=1 SV=2
769	1094	Q9UK76|HN1_HUMAN	106.08	65	6	5	Deamidation (NQ); Acetylation (N-term); Phosphorylation (STY); Citrullination	894000000	1540000000	974000000	1990000000	2580000000	1790000000	1210000000	772000000	553000000	2000000000	3180000000	1890000000	1760000000	2240000000	1690000000	3340000000	2800000000	2460000000	0.45:0.77:0.49:1.00:1.29:0.90:0.60:0.39:0.28:1.00:1.59:0.94:0.88:1.12:0.84:1.67:1.40:1.23	1140000000	2140000000	874000000	2360000000	1900000000	2860000000	0.48:0.91:0.37:1.00:0.80:1.22	16015	Hematological and neurological expressed 1 protein OS=Homo sapiens GN=HN1 PE=1 SV=3
1535	1117	P55769|NH2L1_HUMAN	105.35	38	4	4	Carbamidomethylation; Acetylation (N-term); Deamidation (NQ); Pyro-glu from Q	1250000000	1280000000	777000000	1180000000	1010000000	1050000000	446000000	587000000	396000000	591000000	942000000	452000000	466000000	561000000	288000000	938000000	865000000	612000000	2.12:2.16:1.31:1.99:1.71:1.77:0.76:0.99:0.67:1.00:1.59:0.76:0.79:0.95:0.49:1.59:1.46:1.03	1100000000	1080000000	479000000	699000000	438000000	878000000	1.58:1.54:0.68:1.00:0.63:1.26	14174	NHP2-like protein 1 OS=Homo sapiens GN=SNU13 PE=1 SV=3
2505	2265	Q16850|CP51A_HUMAN	105	7	3	3		160000000	133000000	176000000	204000000	168000000	198000000	255000000	227000000	272000000	233000000	323000000	274000000	439000000	321000000	220000000	494000000	348000000	337000000	0.69:0.57:0.76:0.87:0.72:0.85:1.09:0.97:1.16:1.00:1.39:1.17:1.88:1.38:0.94:2.11:1.49:1.44	157000000	190000000	251000000	277000000	327000000	393000000	0.57:0.69:0.91:1.00:1.18:1.42	56806	Lanosterol 14-alpha demethylase OS=Homo sapiens GN=CYP51A1 PE=1 SV=3
1988	1306	O60869|EDF1_HUMAN	104.89	18	2	2	Acetylation (N-term)	348000000	345000000	304000000	429000000	858000000	298000000	234000000	323000000	75500000	261000000	1010000000	321000000	379000000	149000000	226000000	715000000	483000000	407000000	1.34:1.32:1.17:1.65:3.29:1.14:0.90:1.24:0.29:1.00:3.86:1.23:1.45:0.57:0.87:2.74:1.85:1.56	332000000	528000000	277000000	610000000	322000000	535000000	0.54:0.87:0.45:1.00:0.53:0.88	16369	Endothelial differentiation-related factor 1 OS=Homo sapiens GN=EDF1 PE=1 SV=1
1085	991	P18858|DNLI1_HUMAN	104.86	12	7	7	Phosphorylation (STY); Deamidation (NQ); Carbamidomethylation	107000000	618000000	450000000	111000000	131000000	367000000	523000000	615000000	389000000	516000000	622000000	413000000	740000000	675000000	370000000	236000000	292000000	474000000	0.21:1.20:0.87:0.21:0.25:0.71:1.01:1.19:0.75:1.00:1.21:0.80:1.43:1.31:0.72:0.46:0.57:0.92	538000000	395000000	509000000	517000000	595000000	527000000	1.04:0.76:0.98:1.00:1.15:1.02	101736	DNA ligase 1 OS=Homo sapiens GN=LIG1 PE=1 SV=1
3520	2590	Q7RTV0|PHF5A_HUMAN	104.69	48	4	4	Carbamidomethylation; Acetylation (N-term); Deamidation (NQ)	1090000000	709000000	143000000	338000000	207000000	281000000	129000000	668000000	187000000	631000000	667000000	64800000	239000000	368000000	167000000	321000000	309000000	275000000	1.73:1.12:0.23:0.54:0.33:0.45:0.20:1.06:0.30:1.00:1.06:0.10:0.38:0.58:0.27:0.51:0.49:0.44	852000000	276000000	409000000	628000000	332000000	302000000	1.36:0.44:0.65:1.00:0.53:0.48	12405	PHD finger-like domain-containing protein 5A OS=Homo sapiens GN=PHF5A PE=1 SV=1
3321	20711	Q8N684|CPSF7_HUMAN	104.41	7	2	2		143000000	120000000	90500000	206000000	151000000	163000000	228000000	322000000	188000000	204000000	157000000	172000000	350000000	248000000	229000000	229000000	397000000	258000000	0.70:0.59:0.44:1.01:0.74:0.80:1.12:1.58:0.92:1.00:0.77:0.84:1.71:1.22:1.12:1.12:1.95:1.26	141000000	173000000	246000000	178000000	276000000	295000000	0.79:0.98:1.38:1.00:1.55:1.66	52050	Cleavage and polyadenylation specificity factor subunit 7 OS=Homo sapiens GN=CPSF7 PE=1 SV=1
2809	1750	O75531|BAF_HUMAN	103.92	35	2	2	Carbamidomethylation	488000000	490000000	401000000	575000000	600000000	631000000	337000000	468000000	460000000	555000000	705000000	669000000	448000000	646000000	481000000	1580000000	1230000000	634000000	0.88:0.88:0.72:1.04:1.08:1.14:0.61:0.84:0.83:1.00:1.27:1.21:0.81:1.16:0.87:2.84:2.22:1.14	466000000	605000000	422000000	643000000	527000000	1150000000	0.72:0.94:0.66:1.00:0.82:1.79	10059	Barrier-to-autointegration factor OS=Homo sapiens GN=BANF1 PE=1 SV=1
232	312	Q6PKG0|LARP1_HUMAN	103.3	23	13	10	Carbamidomethylation; Acetylation (N-term); Phosphorylation (STY); Deamidation (NQ)	804000000	835000000	860000000	1590000000	1280000000	1440000000	865000000	1130000000	1080000000	919000000	1600000000	1030000000	977000000	1080000000	1160000000	2050000000	2080000000	2100000000	0.87:0.91:0.94:1.73:1.39:1.57:0.94:1.23:1.17:1.00:1.74:1.12:1.06:1.17:1.26:2.23:2.26:2.28	952000000	1550000000	1170000000	1360000000	1240000000	2430000000	0.70:1.14:0.86:1.00:0.91:1.79	123510	La-related protein 1 OS=Homo sapiens GN=LARP1 PE=1 SV=2
2492	10441	P13984|T2FB_HUMAN	102.99	12	3	3		276000000	201000000	215000000	327000000	351000000	295000000	233000000	288000000	297000000	484000000	395000000	352000000	392000000	383000000	260000000	669000000	689000000	365000000	0.57:0.42:0.44:0.68:0.72:0.61:0.48:0.60:0.61:1.00:0.82:0.73:0.81:0.79:0.54:1.38:1.42:0.75	244000000	324000000	273000000	410000000	345000000	574000000	0.59:0.79:0.66:1.00:0.84:1.40	28380	General transcription factor IIF subunit 2 OS=Homo sapiens GN=GTF2F2 PE=1 SV=2
919	1449	P62328|TYB4_HUMAN	102.84	75	4	4	Acetylation (N-term); Oxidation (M); Deamidation (NQ); Phosphorylation (STY)	26500000000	35500000000	18700000000	26500000000	25800000000	21800000000	6750000000	18300000000	10000000000	4790000000	4230000000	3490000000	11400000000	10500000000	10500000000	18300000000	23200000000	14800000000	5.54:7.41:3.90:5.54:5.40:4.55:1.41:3.81:2.09:1.00:0.88:0.73:2.39:2.19:2.20:3.82:4.84:3.09	26900000000	24800000000	12000000000	4220000000	10800000000	19400000000	6.37:5.87:2.84:1.00:2.57:4.59	5053	Thymosin beta-4 OS=Homo sapiens GN=TMSB4X PE=1 SV=2
1878	1452	P32970|CD70_HUMAN	102.63	28	4	4	Carbamidomethylation	624000000	604000000	243000000	1150000000	861000000	779000000	105000000	504000000	242000000	893000000	1080000000	470000000	800000000	622000000	352000000	1080000000	1180000000	546000000	0.70:0.68:0.27:1.29:0.96:0.87:0.12:0.56:0.27:1.00:1.21:0.53:0.90:0.70:0.39:1.21:1.32:0.61	490000000	931000000	284000000	816000000	591000000	935000000	0.60:1.14:0.35:1.00:0.72:1.15	21118	CD70 antigen OS=Homo sapiens GN=CD70 PE=1 SV=2
328	289	Q14141|SEPT6_HUMAN	102.55	34	12	7	Carbamidomethylation; Acetylation (N-term); Deamidation (NQ)	2830000000	2390000000	2340000000	3060000000	4390000000	2590000000	1200000000	1630000000	1210000000	2830000000	3270000000	1910000000	2080000000	3810000000	2640000000	4140000000	3780000000	3510000000	1.00:0.84:0.83:1.08:1.55:0.92:0.42:0.58:0.43:1.00:1.15:0.67:0.73:1.35:0.93:1.46:1.33:1.24	2520000000	3350000000	1970000000	2670000000	2840000000	3810000000	0.94:1.25:0.74:1.00:1.07:1.43	49717	Septin-6 OS=Homo sapiens GN=SEPT6 PE=1 SV=4
997	948	P16435|NCPR_HUMAN	102.52	12	6	5	Carbamidomethylation	252000000	275000000	220000000	667000000	244000000	515000000	514000000	321000000	589000000	690000000	850000000	576000000	559000000	743000000	548000000	1120000000	942000000	688000000	0.36:0.40:0.32:0.97:0.35:0.75:0.75:0.47:0.85:1.00:1.23:0.84:0.81:1.08:0.79:1.63:1.37:1.00	249000000	613000000	575000000	705000000	617000000	992000000	0.35:0.87:0.82:1.00:0.87:1.41	76690	NADPH--cytochrome P450 reductase OS=Homo sapiens GN=POR PE=1 SV=2
3623	32014	Q96IZ0|PAWR_HUMAN	101.94	18	3	3		131000000	171000000	127000000	107000000	141000000	94400000	217000000	174000000	167000000	82300000	67000000	37200000	190000000	220000000	180000000	65000000	73000000	35200000	1.59:2.08:1.54:1.30:1.71:1.15:2.64:2.11:2.03:1.00:0.81:0.45:2.31:2.67:2.19:0.79:0.89:0.43	143000000	150000000	186000000	73100000	197000000	98600000	1.95:2.05:2.54:1.00:2.69:1.35	36568	PRKC apoptosis WT1 regulator protein OS=Homo sapiens GN=PAWR PE=1 SV=1
519	971	P27694|RFA1_HUMAN	101.88	25	10	10	Carbamidomethylation	382000000	701000000	444000000	834000000	550000000	648000000	864000000	1380000000	607000000	1280000000	1480000000	1180000000	1340000000	1370000000	1070000000	1390000000	1330000000	982000000	0.30:0.55:0.35:0.65:0.43:0.51:0.67:1.08:0.47:1.00:1.15:0.92:1.05:1.07:0.83:1.08:1.04:0.77	551000000	677000000	1010000000	1310000000	1260000000	1260000000	0.42:0.52:0.77:1.00:0.96:0.96	68138	Replication protein A 70 kDa DNA-binding subunit OS=Homo sapiens GN=RPA1 PE=1 SV=2
2134	32076	Q96P11|NSUN5_HUMAN	101.6	10	3	3	Carbamidomethylation; Phosphorylation (STY)	198000000	96400000	94800000	231000000	237000000	154000000	165000000	106000000	183000000	142000000	189000000	118000000	215000000	338000000	145000000	413000000	244000000	305000000	1.40:0.68:0.67:1.63:1.67:1.09:1.17:0.75:1.29:1.00:1.34:0.83:1.52:2.39:1.03:2.92:1.72:2.16	130000000	208000000	187000000	150000000	233000000	321000000	0.87:1.39:1.25:1.00:1.56:2.15	46692	Probable 28S rRNA (cytosine-C(5))-methyltransferase OS=Homo sapiens GN=NSUN5 PE=1 SV=2
3056	98105	P78357|CNTP1_HUMAN	101.25	3	3	3	Carbamidomethylation; Deamidation (NQ)	78700000	76800000	64600000	75100000	98500000	52100000	73800000	99300000	86300000	131000000	109000000	112000000	88800000	104000000	75100000	206000000	177000000	160000000	0.60:0.59:0.49:0.57:0.75:0.40:0.56:0.76:0.66:1.00:0.83:0.86:0.68:0.80:0.57:1.57:1.35:1.22	73400000	75200000	86500000	118000000	90200000	181000000	0.62:0.64:0.74:1.00:0.77:1.54	156266	Contactin-associated protein 1 OS=Homo sapiens GN=CNTNAP1 PE=1 SV=1
2418	1716	Q8NBF2|NHLC2_HUMAN	100.98	8	3	3	Deamidation (NQ); Carbamidomethylation	108000000	48200000	87500000	130000000	39900000	137000000	89700000	156000000	129000000	116000000	60500000	109000000	121000000	14700000	141000000	279000000	236000000	214000000	0.94:0.42:0.76:1.13:0.34:1.18:0.77:1.34:1.11:1.00:0.52:0.94:1.05:0.13:1.22:2.41:2.04:1.85	123000000	133000000	136000000	95700000	144000000	243000000	1.28:1.39:1.42:1.00:1.50:2.54	79444	NHL repeat-containing protein 2 OS=Homo sapiens GN=NHLRC2 PE=1 SV=1
516	4630	Q9NU22|MDN1_HUMAN	100.94	1	6	5	Citrullination; Oxidation (M); Phosphorylation (STY)	141000000	161000000	162000000	519000000	372000000	427000000	264000000	335000000	204000000	386000000	573000000	403000000	405000000	428000000	312000000	338000000	302000000	439000000	0.37:0.42:0.42:1.34:0.96:1.11:0.68:0.87:0.53:1.00:1.48:1.04:1.05:1.11:0.81:0.88:0.78:1.14	161000000	439000000	268000000	454000000	381000000	360000000	0.35:0.97:0.59:1.00:0.84:0.79	632827	Midasin OS=Homo sapiens GN=MDN1 PE=1 SV=2
2528	2610	Q8N183|MIMIT_HUMAN	100.27	20	3	3		109000000	84400000	24500000	210000000	203000000	150000000	52100000	80400000	43100000	107000000	174000000	24200000	325000000	339000000	154000000	92000000	127000000	51900000	1.02:0.79:0.23:1.96:1.89:1.40:0.49:0.75:0.40:1.00:1.62:0.23:3.03:3.16:1.43:0.86:1.19:0.48	86800000	188000000	76500000	124000000	311000000	90400000	0.70:1.52:0.62:1.00:2.51:0.73	19856	Mimitin mitochondrial OS=Homo sapiens GN=NDUFAF2 PE=1 SV=1
156	241	Q15233|NONO_HUMAN	100.25	38	12	12	Carbamidomethylation; Acetylation (N-term); Deamidation (NQ); Oxidation (M)	2890000000	3200000000	2460000000	3460000000	3390000000	2120000000	4850000000	5780000000	3370000000	4750000000	5030000000	3940000000	7910000000	7480000000	4400000000	8650000000	7690000000	4660000000	0.61:0.68:0.52:0.73:0.72:0.45:1.02:1.22:0.71:1.00:1.06:0.83:1.67:1.58:0.93:1.82:1.62:0.98	2850000000	2990000000	4700000000	4570000000	6590000000	7900000000	0.62:0.65:1.03:1.00:1.44:1.73	54232	Non-POU domain-containing octamer-binding protein OS=Homo sapiens GN=NONO PE=1 SV=4
2561	1530	Q9NP97|DLRB1_HUMAN	100.23	44	4	4	Acetylation (N-term)	180000000	374000000	339000000	521000000	752000000	413000000	534000000	503000000	352000000	655000000	702000000	486000000	413000000	436000000	270000000	798000000	851000000	541000000	0.28:0.57:0.52:0.80:1.15:0.63:0.81:0.77:0.54:1.00:1.07:0.74:0.63:0.67:0.41:1.22:1.30:0.83	378000000	564000000	465000000	618000000	373000000	730000000	0.61:0.91:0.75:1.00:0.60:1.18	10922	Dynein light chain roadblock-type 1 OS=Homo sapiens GN=DYNLRB1 PE=1 SV=3
1193	10300	Q96DI7|SNR40_HUMAN	99.93	15	3	3		338000000	308000000	239000000	538000000	673000000	392000000	167000000	314000000	173000000	457000000	471000000	318000000	287000000	406000000	245000000	654000000	485000000	477000000	0.74:0.67:0.52:1.18:1.47:0.86:0.37:0.69:0.38:1.00:1.03:0.70:0.63:0.89:0.54:1.43:1.06:1.04	295000000	534000000	218000000	415000000	313000000	538000000	0.71:1.29:0.53:1.00:0.75:1.30	39311	U5 small nuclear ribonucleoprotein 40 kDa protein OS=Homo sapiens GN=SNRNP40 PE=1 SV=1
3652	52609	P28067|DMA_HUMAN	99.72	8	1	1		106000000	109000000	95800000	171000000	244000000	234000000	159000000	189000000	144000000	252000000	327000000	229000000	190000000	198000000	191000000	265000000	268000000	246000000	0.42:0.43:0.38:0.68:0.97:0.93:0.63:0.75:0.57:1.00:1.30:0.91:0.75:0.79:0.76:1.05:1.06:0.98	104000000	216000000	164000000	269000000	193000000	260000000	0.38:0.80:0.61:1.00:0.72:0.96	29194	HLA class II histocompatibility antigen DM alpha chain OS=Homo sapiens GN=HLA-DMA PE=1 SV=1
2558	1909	Q8TDP1|RNH2C_HUMAN	99.53	35	5	5	Acetylation (N-term); Carbamidomethylation	344000000	242000000	247000000	356000000	439000000	243000000	99200000	199000000	126000000	407000000	397000000	229000000	241000000	297000000	155000000	516000000	483000000	323000000	0.84:0.59:0.61:0.87:1.08:0.60:0.24:0.49:0.31:1.00:0.97:0.56:0.59:0.73:0.38:1.27:1.19:0.79	331000000	346000000	142000000	345000000	253000000	446000000	0.96:1.00:0.41:1.00:0.73:1.29	17840	Ribonuclease H2 subunit C OS=Homo sapiens GN=RNASEH2C PE=1 SV=1
3150	2412	P62877|RBX1_HUMAN	99.29	24	3	3	Acetylation (N-term); Deamidation (NQ); Carbamidomethylation; Pyro-glu from Q	160000000	199000000	646000000	343000000	147000000	290000000	553000000	312000000	825000000	1140000000	498000000	882000000	203000000	309000000	180000000	381000000	733000000	280000000	0.14:0.17:0.57:0.30:0.13:0.25:0.48:0.27:0.72:1.00:0.44:0.77:0.18:0.27:0.16:0.33:0.64:0.24	335000000	260000000	563000000	841000000	231000000	465000000	0.40:0.31:0.67:1.00:0.27:0.55	12274	E3 ubiquitin-protein ligase RBX1 OS=Homo sapiens GN=RBX1 PE=1 SV=1
1765	2144	O14561|ACPM_HUMAN	99.15	28	4	4	Carbamidomethylation	824000000	751000000	749000000	1670000000	1530000000	1490000000	1390000000	486000000	1010000000	1380000000	1070000000	1330000000	1550000000	1720000000	1380000000	2060000000	1790000000	1880000000	0.60:0.54:0.54:1.21:1.11:1.08:1.00:0.35:0.73:1.00:0.77:0.96:1.12:1.25:1.00:1.50:1.30:1.36	786000000	1560000000	961000000	1260000000	1550000000	1910000000	0.62:1.24:0.76:1.00:1.23:1.52	17417	Acyl carrier protein mitochondrial OS=Homo sapiens GN=NDUFAB1 PE=1 SV=3
1471	1038	Q7Z434|MAVS_HUMAN	98.74	27	7	7	Carbamidomethylation; Phosphorylation (STY)	437000000	461000000	370000000	756000000	644000000	545000000	622000000	512000000	567000000	872000000	1200000000	696000000	864000000	917000000	681000000	984000000	1250000000	857000000	0.50:0.53:0.42:0.87:0.74:0.62:0.71:0.59:0.65:1.00:1.37:0.80:0.99:1.05:0.78:1.13:1.43:0.98	423000000	648000000	567000000	922000000	821000000	1030000000	0.46:0.70:0.61:1.00:0.89:1.12	56528	Mitochondrial antiviral-signaling protein OS=Homo sapiens GN=MAVS PE=1 SV=2
1289	1658	P61011|SRP54_HUMAN	98.58	21	7	7	Carbamidomethylation; Deamidation (NQ)	387000000	451000000	389000000	667000000	532000000	291000000	593000000	686000000	471000000	525000000	496000000	394000000	697000000	766000000	588000000	1300000000	901000000	784000000	0.74:0.86:0.74:1.27:1.01:0.55:1.13:1.31:0.90:1.00:0.94:0.75:1.33:1.46:1.12:2.48:1.72:1.49	445000000	554000000	583000000	472000000	683000000	996000000	0.94:1.17:1.24:1.00:1.45:2.11	55705	Signal recognition particle 54 kDa protein OS=Homo sapiens GN=SRP54 PE=1 SV=1
2476	1797	P47914|RL29_HUMAN	98.57	9	1	1	Acetylation (N-term); Deamidation (NQ)	90800000	115000000	212000000	190000000	104000000	170000000	159000000	143000000	215000000	819000000	203000000	321000000	71900000	94200000	46500000	106000000	206000000	38500000	0.11:0.14:0.26:0.23:0.13:0.21:0.19:0.18:0.26:1.00:0.25:0.39:0.09:0.12:0.06:0.13:0.25:0.05	140000000	155000000	173000000	448000000	70900000	157000000	0.31:0.35:0.39:1.00:0.16:0.35	17752	60S ribosomal protein L29 OS=Homo sapiens GN=RPL29 PE=1 SV=2
789	605	Q9NVS9|PNPO_HUMAN	98.51	43	11	11	Acetylation (N-term); Carbamidomethylation	1930000000	1890000000	1730000000	3660000000	3520000000	2790000000	1920000000	2750000000	2560000000	3630000000	4290000000	2880000000	2830000000	3890000000	2310000000	4750000000	4880000000	3890000000	0.53:0.52:0.48:1.01:0.97:0.77:0.53:0.76:0.71:1.00:1.18:0.79:0.78:1.07:0.64:1.31:1.34:1.07	1850000000	3320000000	2410000000	3690000000	3020000000	4520000000	0.50:0.90:0.65:1.00:0.82:1.23	29988	Pyridoxine-5'-phosphate oxidase OS=Homo sapiens GN=PNPO PE=1 SV=1
1376	4432	Q8NFC6|BD1L1_HUMAN	98.27	1	3	3	Phosphorylation (STY)	12400000	38700000	11600000	55200000	18600000	35400000	88000000	163000000	62000000	251000000	351000000	129000000	42700000	49400000	31800000	119000000	100000000	49700000	0.05:0.15:0.05:0.22:0.07:0.14:0.35:0.65:0.25:1.00:1.40:0.51:0.17:0.20:0.13:0.47:0.40:0.20	41300000	44600000	107000000	243000000	41300000	89500000	0.17:0.18:0.44:1.00:0.17:0.37	330467	Biorientation of chromosomes in cell division protein 1-like 1 OS=Homo sapiens GN=BOD1L1 PE=1 SV=2
791	669	P11908|PRPS2_HUMAN	98.26	32	8	2	Carbamidomethylation; Deamidation (NQ); Citrullination	554000000	694000000	703000000	509000000	755000000	422000000	716000000	764000000	893000000	358000000	480000000	448000000	1040000000	1130000000	943000000	1730000000	1560000000	1440000000	1.55:1.94:1.96:1.42:2.11:1.18:2.00:2.13:2.49:1.00:1.34:1.25:2.90:3.16:2.63:4.84:4.37:4.03	650000000	562000000	822000000	455000000	1040000000	1580000000	1.43:1.23:1.81:1.00:2.28:3.47	34769	Ribose-phosphate pyrophosphokinase 2 OS=Homo sapiens GN=PRPS2 PE=1 SV=2
1207	1040	Q8WTT2|NOC3L_HUMAN	98.22	15	10	10	Deamidation (NQ); Phosphorylation (STY); Carbamidomethylation	588000000	550000000	467000000	770000000	569000000	813000000	887000000	1010000000	992000000	956000000	628000000	962000000	698000000	601000000	600000000	1190000000	1590000000	1120000000	0.62:0.58:0.49:0.81:0.60:0.85:0.93:1.05:1.04:1.00:0.66:1.01:0.73:0.63:0.63:1.25:1.66:1.17	593000000	717000000	961000000	849000000	633000000	1300000000	0.70:0.85:1.13:1.00:0.75:1.53	92548	Nucleolar complex protein 3 homolog OS=Homo sapiens GN=NOC3L PE=1 SV=1
3792	2891	Q7L5D6|GET4_HUMAN	97.75	4	1	1	Acetylation (N-term); Oxidation (M)	189000000	219000000	227000000	170000000	81600000	130000000	273000000	322000000	332000000	444000000	413000000	341000000	433000000	567000000	285000000	240000000	388000000	185000000	0.43:0.49:0.51:0.38:0.18:0.29:0.61:0.73:0.75:1.00:0.93:0.77:0.97:1.28:0.64:0.54:0.87:0.42	212000000	127000000	309000000	400000000	428000000	271000000	0.53:0.32:0.77:1.00:1.07:0.68	36504	Golgi to ER traffic protein 4 homolog OS=Homo sapiens GN=GET4 PE=1 SV=1
4674	2865	O95182|NDUA7_HUMAN	97.32	25	2	2		397000000	835000000	93200000	108000000	28700000	40300000	122000000	94000000	70000000	96900000	440000000	34900000	57400000	110000000	36800000	1340000000	27900000	10700000	4.09:8.61:0.96:1.11:0.30:0.42:1.26:0.97:0.72:1.00:4.54:0.36:0.59:1.13:0.38:13.84:0.29:0.11	441000000	73600000	95500000	196000000	68000000	681000000	2.26:0.38:0.49:1.00:0.35:3.48	12551	NADH dehydrogenase [ubiquinone] 1 alpha subcomplex subunit 7 OS=Homo sapiens GN=NDUFA7 PE=1 SV=3
3950	10493	Q96P16|RPR1A_HUMAN	97.24	14	3	3	Acetylation (N-term)	89800000	110000000	110000000	151000000	123000000	100000000	162000000	150000000	130000000	168000000	151000000	141000000	130000000	188000000	82700000	308000000	291000000	222000000	0.53:0.65:0.65:0.90:0.73:0.60:0.96:0.89:0.77:1.00:0.90:0.84:0.77:1.12:0.49:1.83:1.73:1.32	103000000	125000000	148000000	153000000	149000000	274000000	0.67:0.82:0.96:1.00:0.97:1.79	35720	Regulation of nuclear pre-mRNA domain-containing protein 1A OS=Homo sapiens GN=RPRD1A PE=1 SV=1
983	2182	O43847|NRDC_HUMAN	97.02	6	7	7	Carbamidomethylation	301000000	314000000	231000000	410000000	352000000	260000000	353000000	449000000	136000000	600000000	453000000	330000000	621000000	381000000	357000000	662000000	1050000000	332000000	0.50:0.52:0.38:0.68:0.59:0.43:0.59:0.75:0.23:1.00:0.76:0.55:1.04:0.63:0.59:1.10:1.75:0.55	282000000	341000000	351000000	461000000	453000000	681000000	0.61:0.74:0.76:1.00:0.98:1.48	131571	Nardilysin OS=Homo sapiens GN=NRDC PE=1 SV=2
1753	2587	Q9BTE6|AASD1_HUMAN	96.34	17	4	4	Carbamidomethylation; Acetylation (N-term)	220000000	255000000	184000000	358000000	392000000	257000000	313000000	306000000	228000000	362000000	449000000	288000000	380000000	446000000	331000000	612000000	489000000	487000000	0.61:0.70:0.51:0.99:1.08:0.71:0.86:0.84:0.63:1.00:1.24:0.79:1.05:1.23:0.91:1.69:1.35:1.34	252000000	336000000	282000000	366000000	386000000	529000000	0.69:0.92:0.77:1.00:1.05:1.44	45480	Alanyl-tRNA editing protein Aarsd1 OS=Homo sapiens GN=AARSD1 PE=1 SV=2
1392	945	Q9UL25|RAB21_HUMAN	95.8	39	8	8	Carbamidomethylation; Acetylation (N-term)	527000000	689000000	297000000	990000000	1070000000	768000000	830000000	1030000000	528000000	792000000	740000000	882000000	1400000000	1130000000	1090000000	1380000000	2020000000	1050000000	0.67:0.87:0.37:1.25:1.35:0.97:1.05:1.29:0.67:1.00:0.93:1.11:1.76:1.43:1.38:1.74:2.55:1.33	504000000	943000000	848000000	897000000	1210000000	1480000000	0.56:1.05:0.95:1.00:1.35:1.65	24348	Ras-related protein Rab-21 OS=Homo sapiens GN=RAB21 PE=1 SV=3
2553	3018	P61619|S61A1_HUMAN	95.65	4	2	2		306000000	380000000	245000000	412000000	497000000	236000000	501000000	489000000	358000000	814000000	750000000	464000000	734000000	578000000	415000000	845000000	946000000	443000000	0.38:0.47:0.30:0.51:0.61:0.29:0.62:0.60:0.44:1.00:0.92:0.57:0.90:0.71:0.51:1.04:1.16:0.54	310000000	382000000	449000000	676000000	576000000	745000000	0.46:0.56:0.66:1.00:0.85:1.10	52265	Protein transport protein Sec61 subunit alpha isoform 1 OS=Homo sapiens GN=SEC61A1 PE=1 SV=2
3654	105380	Q9UK45|LSM7_HUMAN	95.63	8	1	1	Carbamidomethylation; Pyro-glu from Q	19200000	33000000	18400000	58100000	77100000	23900000	18100000	15300000	11800000	74100000	58800000	26400000	41000000	24500000	16400000	118000000	126000000	41300000	0.26:0.44:0.25:0.78:1.04:0.32:0.24:0.21:0.16:1.00:0.79:0.36:0.55:0.33:0.22:1.59:1.70:0.56	23500000	53000000	15100000	53100000	27300000	95100000	0.44:1.00:0.28:1.00:0.51:1.79	11602	U6 snRNA-associated Sm-like protein LSm7 OS=Homo sapiens GN=LSM7 PE=1 SV=1
3204	52597	Q99747|SNAG_HUMAN	95.57	11	3	3		147000000	132000000	106000000	210000000	239000000	146000000	142000000	104000000	94900000	261000000	243000000	154000000	191000000	147000000	109000000	328000000	376000000	220000000	0.57:0.51:0.41:0.81:0.92:0.56:0.55:0.40:0.36:1.00:0.93:0.59:0.73:0.56:0.42:1.26:1.44:0.84	128000000	198000000	114000000	219000000	149000000	308000000	0.59:0.90:0.52:1.00:0.68:1.41	34746	Gamma-soluble NSF attachment protein OS=Homo sapiens GN=NAPG PE=1 SV=1
89	105	P11940|PABP1_HUMAN	94.75	43	29	7	Acetylation (N-term); Carbamidomethylation; Deamidation (NQ); Pyro-glu from Q; Oxidation (M)	393000000	326000000	176000000	726000000	917000000	661000000	189000000	211000000	245000000	763000000	1330000000	616000000	484000000	776000000	341000000	921000000	711000000	798000000	0.52:0.43:0.23:0.95:1.20:0.87:0.25:0.28:0.32:1.00:1.74:0.81:0.63:1.02:0.45:1.21:0.93:1.05	299000000	768000000	237000000	903000000	569000000	810000000	0.33:0.85:0.26:1.00:0.63:0.90	70671	Polyadenylate-binding protein 1 OS=Homo sapiens GN=PABPC1 PE=1 SV=2
4167	47038	P49366|DHYS_HUMAN	94.03	5	2	2		153000000	82500000	66300000	143000000	154000000	52100000	39200000	47000000	32500000	161000000	161000000	46200000	68000000	121000000	43600000	188000000	40500000	98100000	0.95:0.51:0.41:0.89:0.96:0.32:0.24:0.29:0.20:1.00:1.00:0.29:0.42:0.75:0.27:1.17:0.25:0.61	124000000	141000000	59400000	148000000	96300000	135000000	0.83:0.95:0.40:1.00:0.65:0.91	40971	Deoxyhypusine synthase OS=Homo sapiens GN=DHPS PE=1 SV=1
1467	2597	P52789|HXK2_HUMAN	93.63	10	7	5	Carbamidomethylation; Phosphorylation (STY)	188000000	194000000	140000000	337000000	305000000	251000000	214000000	130000000	97500000	330000000	427000000	283000000	244000000	243000000	154000000	473000000	450000000	319000000	0.57:0.59:0.43:1.02:0.93:0.76:0.65:0.39:0.30:1.00:1.29:0.86:0.74:0.74:0.47:1.43:1.37:0.97	174000000	298000000	147000000	347000000	214000000	414000000	0.50:0.86:0.42:1.00:0.62:1.19	102380	Hexokinase-2 OS=Homo sapiens GN=HK2 PE=1 SV=2
2815	3100	Q969G3|SMCE1_HUMAN	93.43	7	2	2		70900000	62200000	107000000	281000000	256000000	238000000	148000000	177000000	92300000	111000000	192000000	131000000	58600000	131000000	76100000	174000000	260000000	214000000	0.64:0.56:0.96:2.53:2.31:2.14:1.34:1.59:0.83:1.00:1.73:1.18:0.53:1.18:0.69:1.57:2.34:1.93	112000000	259000000	139000000	174000000	102000000	216000000	0.64:1.49:0.80:1.00:0.58:1.24	46649	SWI/SNF-related matrix-associated actin-dependent regulator of chromatin subfamily E member 1 OS=Homo sapiens GN=SMARCE1 PE=1 SV=2
5759	94844	Q8NG11|TSN14_HUMAN	93.41	3	1	1		76000000	130000000	233000000	662000000	150000000	569000000	172000000	135000000	270000000	451000000	210000000	460000000	232000000	366000000	198000000	87800000	208000000	77000000	0.17:0.29:0.52:1.47:0.33:1.26:0.38:0.30:0.60:1.00:0.47:1.02:0.52:0.81:0.44:0.19:0.46:0.17	146000000	460000000	192000000	374000000	266000000	124000000	0.39:1.23:0.51:1.00:0.71:0.33	30691	Tetraspanin-14 OS=Homo sapiens GN=TSPAN14 PE=1 SV=1
239	256	O60841|IF2P_HUMAN	93.28	16	13	13	Phosphorylation (STY); Pyro-glu from Q; Acetylation (N-term); Deamidation (NQ)	733000000	844000000	710000000	1010000000	1160000000	779000000	1000000000	1210000000	1040000000	982000000	1330000000	987000000	1300000000	1520000000	1070000000	2050000000	1870000000	1500000000	0.75:0.86:0.72:1.02:1.18:0.79:1.02:1.23:1.06:1.00:1.35:1.00:1.33:1.55:1.09:2.09:1.91:1.52	762000000	981000000	1270000000	1140000000	1300000000	1810000000	0.67:0.86:1.11:1.00:1.14:1.59	138827	Eukaryotic translation initiation factor 5B OS=Homo sapiens GN=EIF5B PE=1 SV=4
2160	1545	O43665|RGS10_HUMAN	93.19	23	3	3		193000000	342000000	153000000	419000000	343000000	247000000	163000000	225000000	36800000	273000000	199000000	165000000	358000000	229000000	177000000	267000000	484000000	169000000	0.71:1.25:0.56:1.53:1.25:0.90:0.60:0.83:0.13:1.00:0.73:0.60:1.31:0.84:0.65:0.98:1.77:0.62	230000000	336000000	173000000	231000000	254000000	307000000	1.00:1.46:0.75:1.00:1.10:1.33	20236	Regulator of G-protein signaling 10 OS=Homo sapiens GN=RGS10 PE=1 SV=2
588	541	Q9Y2W1|TR150_HUMAN	92.97	9	7	7	Phosphorylation (STY); Citrullination	693000000	831000000	610000000	682000000	779000000	588000000	699000000	965000000	679000000	829000000	783000000	639000000	962000000	1050000000	626000000	1770000000	1970000000	1310000000	0.84:1.00:0.74:0.82:0.94:0.71:0.84:1.16:0.82:1.00:0.94:0.77:1.16:1.26:0.76:2.14:2.38:1.58	733000000	683000000	803000000	750000000	878000000	1680000000	0.98:0.91:1.07:1.00:1.17:2.25	108666	Thyroid hormone receptor-associated protein 3 OS=Homo sapiens GN=THRAP3 PE=1 SV=2
1176	1972	Q96A33|CCD47_HUMAN	92.66	13	5	5	Carbamidomethylation	112000000	385000000	345000000	584000000	599000000	346000000	577000000	584000000	479000000	945000000	748000000	649000000	951000000	536000000	502000000	600000000	957000000	292000000	0.12:0.41:0.36:0.62:0.63:0.37:0.61:0.62:0.51:1.00:0.79:0.69:1.01:0.57:0.53:0.63:1.01:0.31	360000000	551000000	547000000	781000000	731000000	690000000	0.46:0.71:0.70:1.00:0.94:0.88	55874	Coiled-coil domain-containing protein 47 OS=Homo sapiens GN=CCDC47 PE=1 SV=1
297	787	Q10567|AP1B1_HUMAN	92.41	17	14	8	Carbamidomethylation; Acetylation (N-term); Deamidation (NQ)	658000000	653000000	508000000	807000000	894000000	649000000	389000000	410000000	197000000	920000000	753000000	782000000	592000000	687000000	512000000	905000000	896000000	672000000	0.71:0.71:0.55:0.88:0.97:0.71:0.42:0.45:0.21:1.00:0.82:0.85:0.64:0.75:0.56:0.98:0.97:0.73	652000000	783000000	514000000	818000000	629000000	824000000	0.80:0.96:0.63:1.00:0.77:1.01	104637	AP-1 complex subunit beta-1 OS=Homo sapiens GN=AP1B1 PE=1 SV=2
162	199	P49321|NASP_HUMAN	92.28	31	14	14	Deamidation (NQ); Carbamidomethylation	330000000	395000000	507000000	826000000	678000000	824000000	592000000	859000000	881000000	745000000	1020000000	875000000	894000000	1040000000	970000000	935000000	801000000	979000000	0.44:0.53:0.68:1.11:0.91:1.11:0.79:1.15:1.18:1.00:1.37:1.17:1.20:1.40:1.30:1.25:1.08:1.31	411000000	776000000	777000000	880000000	969000000	905000000	0.47:0.88:0.88:1.00:1.10:1.03	85238	Nuclear autoantigenic sperm protein OS=Homo sapiens GN=NASP PE=1 SV=2
4779	3299	Q9H1K1|ISCU_HUMAN	92	10	2	2		210000000	225000000	145000000	275000000	142000000	85700000	143000000	145000000	104000000	268000000	122000000	46200000	239000000	215000000	97400000	597000000	584000000	186000000	0.78:0.84:0.54:1.03:0.53:0.32:0.53:0.54:0.39:1.00:0.46:0.17:0.89:0.80:0.36:2.23:2.18:0.70	193000000	193000000	131000000	254000000	184000000	501000000	0.76:0.76:0.51:1.00:0.73:1.98	17999	Iron-sulfur cluster assembly enzyme ISCU mitochondrial OS=Homo sapiens GN=ISCU PE=1 SV=2
4764	67718	Q5JVF3|PCID2_HUMAN	91.85	7	2	2	Carbamidomethylation; Pyro-glu from Q	99400000	106000000	41500000	59600000	92500000	34500000	70400000	48200000	19000000	94800000	146000000	34700000	104000000	148000000	72400000	177000000	156000000	98300000	1.05:1.12:0.44:0.63:0.98:0.36:0.74:0.51:0.20:1.00:1.54:0.37:1.10:1.56:0.76:1.87:1.65:1.04	94000000	62200000	72300000	111000000	108000000	144000000	0.85:0.56:0.65:1.00:0.97:1.29	46030	PCI domain-containing protein 2 OS=Homo sapiens GN=PCID2 PE=1 SV=2
1171	873	P61026|RAB10_HUMAN	91.12	34	6	4	Acetylation (N-term); Deamidation (NQ)	450000000	397000000	401000000	425000000	681000000	311000000	340000000	505000000	430000000	370000000	440000000	290000000	413000000	810000000	510000000	1290000000	596000000	1040000000	1.22:1.07:1.09:1.15:1.84:0.84:0.92:1.37:1.16:1.00:1.19:0.78:1.12:2.19:1.38:3.50:1.61:2.81	416000000	472000000	425000000	367000000	578000000	976000000	1.14:1.29:1.16:1.00:1.58:2.66	22541	Ras-related protein Rab-10 OS=Homo sapiens GN=RAB10 PE=1 SV=1
398	517	P62979|RS27A_HUMAN	90.99	47	13	5	Carbamidomethylation; Acetylation (N-term); Oxidation (M); Deamidation (NQ); Citrullination	2450000000	2840000000	1610000000	1330000000	1410000000	1310000000	3550000000	3600000000	2340000000	3890000000	2930000000	2090000000	3970000000	3830000000	2920000000	1980000000	3650000000	1620000000	0.63:0.73:0.41:0.34:0.36:0.34:0.91:0.93:0.60:1.00:0.75:0.54:1.02:0.99:0.75:0.51:0.94:0.42	2310000000	1350000000	3170000000	2970000000	3580000000	2420000000	0.78:0.45:1.07:1.00:1.20:0.81	17965	Ubiquitin-40S ribosomal protein S27a OS=Homo sapiens GN=RPS27A PE=1 SV=2
604	503	Q9UKY7|CDV3_HUMAN	90.93	69	11	11	Oxidation (M); Pyro-glu from Q; Phosphorylation (STY); Deamidation (NQ); Citrullination	1280000000	1390000000	1760000000	2060000000	2030000000	1660000000	2630000000	2270000000	2410000000	4190000000	3420000000	3070000000	2790000000	3300000000	2720000000	3350000000	3740000000	3300000000	0.30:0.33:0.42:0.49:0.48:0.40:0.63:0.54:0.58:1.00:0.81:0.73:0.66:0.79:0.65:0.80:0.89:0.79	1480000000	1920000000	2440000000	3590000000	2940000000	3570000000	0.41:0.53:0.68:1.00:0.82:0.99	27335	Protein CDV3 homolog OS=Homo sapiens GN=CDV3 PE=1 SV=1
1750	1263	Q4VC31|CCD58_HUMAN	90.76	23	3	3	Carbamidomethylation; Deamidation (NQ)	575000000	730000000	377000000	1020000000	1290000000	575000000	311000000	490000000	432000000	939000000	1080000000	520000000	587000000	755000000	450000000	636000000	917000000	219000000	0.61:0.78:0.40:1.09:1.37:0.61:0.33:0.52:0.46:1.00:1.15:0.55:0.63:0.80:0.48:0.68:0.98:0.23	560000000	962000000	411000000	848000000	597000000	623000000	0.66:1.13:0.48:1.00:0.70:0.74	16620	Coiled-coil domain-containing protein 58 OS=Homo sapiens GN=CCDC58 PE=1 SV=1
2219	1891	Q9BRJ6|CG050_HUMAN	90.61	46	6	5	Pyro-glu from Q; Phosphorylation (STY); Carbamidomethylation; Deamidation (NQ)	352000000	309000000	219000000	467000000	510000000	362000000	297000000	419000000	269000000	270000000	422000000	199000000	438000000	527000000	385000000	778000000	888000000	394000000	1.30:1.14:0.81:1.73:1.89:1.34:1.10:1.55:1.00:1.00:1.56:0.73:1.62:1.95:1.42:2.88:3.28:1.46	336000000	446000000	329000000	309000000	450000000	687000000	1.09:1.45:1.07:1.00:1.46:2.23	22083	Uncharacterized protein C7orf50 OS=Homo sapiens GN=C7orf50 PE=1 SV=1
4722	2840	Q9Y241|HIG1A_HUMAN	90.38	19	1	1	Acetylation (N-term)	460000000	338000000	284000000	402000000	179000000	436000000	274000000	492000000	325000000	573000000	767000000	677000000	170000000	155000000	142000000	377000000	523000000	434000000	0.80:0.59:0.49:0.70:0.31:0.76:0.48:0.86:0.57:1.00:1.34:1.18:0.30:0.27:0.25:0.66:0.91:0.76	361000000	339000000	364000000	673000000	158000000	445000000	0.54:0.50:0.54:1.00:0.24:0.66	10143	HIG1 domain family member 1A mitochondrial OS=Homo sapiens GN=HIGD1A PE=1 SV=1
2999	2428	O60563|CCNT1_HUMAN	89.96	2	1	1	Carbamidomethylation	201000000	247000000	89800000	51500000	207000000	45400000	180000000	221000000	125000000	180000000	283000000	72100000	49200000	145000000	56700000	183000000	0	14600000	1.12:1.37:0.50:0.29:1.14:0.25:0.99:1.22:0.69:1.00:1.57:0.40:0.27:0.80:0.31:1.01:0:0.08	179000000	101000000	175000000	179000000	98800000	139000000	1.01:0.57:0.98:1.00:0.55:0.78	80685	Cyclin-T1 OS=Homo sapiens GN=CCNT1 PE=1 SV=1
977	3078	A4UGR9|XIRP2_HUMAN	89.16	1	2	2	Carbamidomethylation; Deamidation (NQ)	124000000	160000000	216000000	209000000	67700000	120000000	120000000	189000000	226000000	385000000	266000000	225000000	35900000	328000000	66800000	405000000	564000000	192000000	0.32:0.42:0.56:0.54:0.18:0.31:0.31:0.49:0.59:1.00:0.69:0.58:0.09:0.85:0.17:1.05:1.46:0.50	167000000	132000000	212000000	292000000	200000000	387000000	0.57:0.45:0.72:1.00:0.69:1.33	382302	Xin actin-binding repeat-containing protein 2 OS=Homo sapiens GN=XIRP2 PE=1 SV=2
2014	1887	Q9H987|SYP2L_HUMAN	89.02	5	3	3	Acetylation (N-term); Deamidation (NQ); Citrullination	224000000	371000000	405000000	910000000	321000000	358000000	547000000	521000000	429000000	2280000000	704000000	496000000	266000000	350000000	86000000	508000000	1550000000	259000000	0.10:0.16:0.18:0.40:0.14:0.16:0.24:0.23:0.19:1.00:0.31:0.22:0.12:0.15:0.04:0.22:0.68:0.11	384000000	572000000	538000000	1160000000	274000000	773000000	0.33:0.49:0.46:1.00:0.24:0.67	102481	Synaptopodin 2-like protein OS=Homo sapiens GN=SYNPO2L PE=2 SV=3
1187	1128	P62942|FKB1A_HUMAN	88.88	29	4	4	Carbamidomethylation; Acetylation (N-term); Deamidation (NQ)	3410000000	3850000000	3050000000	3950000000	3220000000	3110000000	1160000000	1620000000	1660000000	4860000000	3330000000	3330000000	2810000000	2370000000	1880000000	5300000000	5760000000	2130000000	0.70:0.79:0.63:0.81:0.66:0.64:0.24:0.33:0.34:1.00:0.68:0.68:0.58:0.49:0.39:1.09:1.19:0.44	3430000000	3450000000	1480000000	3840000000	2350000000	4460000000	0.89:0.90:0.39:1.00:0.61:1.16	11951	Peptidyl-prolyl cis-trans isomerase FKBP1A OS=Homo sapiens GN=FKBP1A PE=1 SV=2
781	872	P30520|PURA2_HUMAN	88.77	26	8	8	Carbamidomethylation; Acetylation (N-term); Deamidation (NQ)	1560000000	1410000000	2070000000	2010000000	2080000000	2910000000	2630000000	2000000000	754000000	1770000000	2050000000	1420000000	2910000000	2000000000	2050000000	3920000000	4340000000	3400000000	0.88:0.79:1.16:1.14:1.17:1.64:1.48:1.13:0.43:1.00:1.16:0.80:1.64:1.13:1.15:2.21:2.45:1.92	2280000000	2330000000	2300000000	1750000000	2670000000	3890000000	1.30:1.33:1.31:1.00:1.53:2.22	50097	Adenylosuccinate synthetase isozyme 2 OS=Homo sapiens GN=ADSS PE=1 SV=3
1091	1837	P78316|NOP14_HUMAN	88.69	7	4	4	Phosphorylation (STY)	215000000	242000000	155000000	260000000	311000000	246000000	216000000	297000000	212000000	254000000	223000000	222000000	292000000	237000000	238000000	475000000	547000000	395000000	0.85:0.95:0.61:1.02:1.22:0.97:0.85:1.17:0.83:1.00:0.88:0.87:1.15:0.93:0.94:1.87:2.15:1.55	204000000	272000000	242000000	233000000	256000000	472000000	0.87:1.17:1.04:1.00:1.10:2.03	97668	Nucleolar protein 14 OS=Homo sapiens GN=NOP14 PE=1 SV=3
3505	2925	A8MWD9|RUXGL_HUMAN	88.54	25	2	2		663000000	834000000	735000000	729000000	810000000	454000000	405000000	336000000	332000000	631000000	432000000	509000000	393000000	326000000	246000000	940000000	920000000	241000000	1.05:1.32:1.16:1.15:1.28:0.72:0.64:0.53:0.53:1.00:0.68:0.81:0.62:0.52:0.39:1.49:1.46:0.38	744000000	664000000	360000000	524000000	321000000	700000000	1.42:1.27:0.69:1.00:0.61:1.34	8544	Putative small nuclear ribonucleoprotein G-like protein 15 OS=Homo sapiens GN=SNRPGP15 PE=5 SV=2
1020	1606	P15927|RFA2_HUMAN	88.06	21	3	3	Carbamidomethylation; Pyro-glu from Q	386000000	231000000	275000000	369000000	425000000	238000000	452000000	327000000	396000000	329000000	457000000	295000000	324000000	553000000	445000000	684000000	788000000	588000000	1.17:0.70:0.84:1.12:1.29:0.72:1.38:0.99:1.20:1.00:1.39:0.90:0.98:1.68:1.35:2.08:2.40:1.79	335000000	379000000	448000000	483000000	524000000	687000000	0.69:0.78:0.93:1.00:1.09:1.42	29247	Replication protein A 32 kDa subunit OS=Homo sapiens GN=RPA2 PE=1 SV=1
400	329	P12236|ADT3_HUMAN	87.54	36	14	2	Carbamidomethylation; Acetylation (N-term); Deamidation (NQ)	174000000	207000000	229000000	265000000	101000000	85600000	533000000	250000000	259000000	792000000	323000000	213000000	197000000	304000000	66800000	219000000	562000000	72100000	0.22:0.26:0.29:0.33:0.13:0.11:0.67:0.32:0.33:1.00:0.41:0.27:0.25:0.38:0.08:0.28:0.71:0.09	204000000	153000000	347000000	443000000	189000000	289000000	0.46:0.35:0.78:1.00:0.43:0.65	32866	ADP/ATP translocase 3 OS=Homo sapiens GN=SLC25A6 PE=1 SV=4
786	645	P60891|PRPS1_HUMAN	87.47	36	9	2	Carbamidomethylation; Deamidation (NQ); Citrullination	131000000	98900000	63900000	165000000	68900000	2180000000	3060000000	1870000000	1890000000	3680000000	3710000000	3280000000	619000000	103000000	1750000000	84600000	69600000	116000000	0.04:0.03:0.02:0.04:0.02:0.59:0.83:0.51:0.51:1.00:1.01:0.89:0.17:0.03:0.48:0.02:0.02:0.03	127000000	1170000000	2270000000	3550000000	1190000000	107000000	0.04:0.33:0.64:1.00:0.34:0.03	34834	Ribose-phosphate pyrophosphokinase 1 OS=Homo sapiens GN=PRPS1 PE=1 SV=2
1064	1757	O43852|CALU_HUMAN	87.44	28	8	7	Phosphorylation (STY); Deamidation (NQ)	687000000	725000000	447000000	1000000000	1180000000	760000000	836000000	1380000000	951000000	1400000000	1300000000	1020000000	1460000000	1550000000	1270000000	1530000000	1460000000	1140000000	0.49:0.52:0.32:0.71:0.84:0.54:0.60:0.98:0.68:1.00:0.93:0.73:1.04:1.11:0.91:1.09:1.04:0.81	620000000	979000000	1050000000	1240000000	1430000000	1430000000	0.50:0.79:0.85:1.00:1.15:1.16	37107	Calumenin OS=Homo sapiens GN=CALU PE=1 SV=2
4564	1940	O60925|PFD1_HUMAN	87.27	16	2	2	Acetylation (N-term)	228000000	362000000	223000000	712000000	506000000	664000000	363000000	559000000	355000000	893000000	1050000000	738000000	778000000	475000000	620000000	693000000	844000000	249000000	0.26:0.41:0.25:0.80:0.57:0.74:0.41:0.63:0.40:1.00:1.18:0.83:0.87:0.53:0.69:0.78:0.94:0.28	271000000	627000000	514000000	895000000	680000000	734000000	0.30:0.70:0.57:1.00:0.76:0.82	14210	Prefoldin subunit 1 OS=Homo sapiens GN=PFDN1 PE=1 SV=2
1645	2169	Q9C0E2|XPO4_HUMAN	87.22	8	6	6	Acetylation (N-term); Oxidation (M); Deamidation (NQ); Phosphorylation (STY)	269000000	214000000	161000000	1570000000	236000000	160000000	192000000	303000000	289000000	240000000	462000000	184000000	157000000	109000000	185000000	353000000	252000000	291000000	1.12:0.89:0.67:6.55:0.98:0.67:0.80:1.26:1.20:1.00:1.92:0.76:0.65:0.46:0.77:1.47:1.05:1.21	232000000	1580000000	266000000	400000000	188000000	299000000	0.58:3.95:0.66:1.00:0.47:0.75	130139	Exportin-4 OS=Homo sapiens GN=XPO4 PE=1 SV=2
855	547	Q08945|SSRP1_HUMAN	86.31	24	11	11	Carbamidomethylation; Acetylation (N-term); Phosphorylation (STY); Pyro-glu from Q	892000000	847000000	598000000	1140000000	2040000000	1110000000	533000000	809000000	531000000	597000000	569000000	484000000	665000000	1130000000	566000000	1470000000	1320000000	1190000000	1.49:1.42:1.00:1.90:3.42:1.86:0.89:1.36:0.89:1.00:0.95:0.81:1.11:1.89:0.95:2.47:2.21:1.99	779000000	1430000000	625000000	607000000	787000000	1330000000	1.28:2.36:1.03:1.00:1.30:2.19	81075	FACT complex subunit SSRP1 OS=Homo sapiens GN=SSRP1 PE=1 SV=1
627	664	Q7L2H7|EIF3M_HUMAN	86.17	28	8	8	Acetylation (N-term); Deamidation (NQ); Carbamidomethylation	1600000000	1740000000	1490000000	2120000000	1990000000	1710000000	2610000000	3150000000	2370000000	2510000000	2910000000	2490000000	2440000000	3130000000	2180000000	4190000000	3240000000	3620000000	0.64:0.69:0.59:0.84:0.79:0.68:1.04:1.25:0.94:1.00:1.16:0.99:0.97:1.25:0.87:1.67:1.29:1.45	1610000000	1940000000	2710000000	2640000000	2590000000	4340000000	0.61:0.74:1.03:1.00:0.98:1.65	42503	Eukaryotic translation initiation factor 3 subunit M OS=Homo sapiens GN=EIF3M PE=1 SV=1
2280	1178	Q9Y2V2|CHSP1_HUMAN	86.04	39	4	4	Acetylation (N-term); Deamidation (NQ); Phosphorylation (STY)	833000000	1180000000	710000000	1330000000	734000000	667000000	1640000000	1920000000	1110000000	2040000000	2110000000	1320000000	1490000000	1730000000	972000000	2260000000	2450000000	1520000000	0.41:0.58:0.35:0.65:0.36:0.33:0.80:0.94:0.54:1.00:1.03:0.65:0.73:0.85:0.48:1.11:1.20:0.75	909000000	911000000	1550000000	1820000000	1400000000	2080000000	0.50:0.50:0.85:1.00:0.77:1.14	15892	Calcium-regulated heat-stable protein 1 OS=Homo sapiens GN=CARHSP1 PE=1 SV=2
1523	1644	P09326|CD48_HUMAN	85.93	15	3	3	Carbamidomethylation; Acetylation (N-term); Deamidation (NQ)	581000000	684000000	399000000	615000000	677000000	313000000	266000000	455000000	267000000	264000000	389000000	147000000	244000000	333000000	152000000	513000000	549000000	258000000	2.20:2.59:1.51:2.33:2.57:1.19:1.01:1.72:1.01:1.00:1.48:0.56:0.92:1.26:0.58:1.94:2.08:0.98	555000000	535000000	329000000	266000000	243000000	440000000	2.08:2.01:1.24:1.00:0.91:1.65	27683	CD48 antigen OS=Homo sapiens GN=CD48 PE=1 SV=2
1500	1892	Q13907|IDI1_HUMAN	85.76	22	3	3	Carbamidomethylation	608000000	750000000	842000000	1120000000	1070000000	717000000	962000000	1230000000	1110000000	962000000	999000000	1150000000	1270000000	1180000000	1290000000	2060000000	1470000000	1490000000	0.63:0.78:0.87:1.16:1.11:0.75:1.00:1.28:1.15:1.00:1.04:1.20:1.31:1.22:1.34:2.14:1.53:1.55	733000000	968000000	1100000000	1040000000	1240000000	1670000000	0.71:0.93:1.06:1.00:1.20:1.61	26319	Isopentenyl-diphosphate Delta-isomerase 1 OS=Homo sapiens GN=IDI1 PE=1 SV=2
1737	2513	O95376|ARI2_HUMAN	85.75	8	3	3		201000000	260000000	213000000	288000000	359000000	231000000	297000000	174000000	179000000	305000000	254000000	221000000	303000000	269000000	232000000	599000000	579000000	360000000	0.66:0.85:0.70:0.94:1.18:0.76:0.97:0.57:0.59:1.00:0.83:0.72:0.99:0.88:0.76:1.97:1.90:1.18	240000000	293000000	243000000	260000000	268000000	555000000	0.92:1.13:0.94:1.00:1.03:2.14	57819	E3 ubiquitin-protein ligase ARIH2 OS=Homo sapiens GN=ARIH2 PE=1 SV=1
1884	1244	Q9H773|DCTP1_HUMAN	85.64	38	6	6	Carbamidomethylation	671000000	828000000	528000000	1230000000	1260000000	894000000	903000000	583000000	495000000	1350000000	1610000000	1030000000	1690000000	1730000000	1100000000	1610000000	1640000000	1280000000	0.50:0.61:0.39:0.91:0.93:0.66:0.67:0.43:0.37:1.00:1.19:0.76:1.25:1.28:0.81:1.19:1.21:0.95	676000000	1130000000	660000000	1330000000	1510000000	1510000000	0.51:0.85:0.50:1.00:1.13:1.14	18681	dCTP pyrophosphatase 1 OS=Homo sapiens GN=DCTPP1 PE=1 SV=1
765	1126	P13284|GILT_HUMAN	85.44	42	7	7	Carbamidomethylation; Deamidation (NQ)	415000000	404000000	343000000	789000000	1070000000	880000000	383000000	721000000	387000000	666000000	889000000	621000000	608000000	1060000000	737000000	969000000	751000000	926000000	0.62:0.61:0.51:1.18:1.61:1.32:0.58:1.08:0.58:1.00:1.34:0.93:0.91:1.59:1.11:1.45:1.13:1.39	387000000	944000000	519000000	733000000	811000000	882000000	0.53:1.29:0.71:1.00:1.11:1.20	27964	Gamma-interferon-inducible lysosomal thiol reductase OS=Homo sapiens GN=IFI30 PE=1 SV=3
2166	2201	Q96C57|CL043_HUMAN	85.3	26	3	3	Acetylation (N-term); Phosphorylation (STY)	211000000	226000000	144000000	215000000	318000000	89800000	222000000	317000000	184000000	177000000	292000000	114000000	209000000	280000000	204000000	498000000	390000000	433000000	1.19:1.27:0.81:1.21:1.80:0.51:1.25:1.79:1.04:1.00:1.65:0.64:1.18:1.58:1.15:2.81:2.20:2.44	206000000	209000000	241000000	195000000	231000000	440000000	1.06:1.07:1.24:1.00:1.19:2.26	28170	Uncharacterized protein C12orf43 OS=Homo sapiens GN=C12orf43 PE=1 SV=2
1285	832	Q9UHB6|LIMA1_HUMAN	85.17	14	6	6	Deamidation (NQ); Oxidation (HW); Citrullination	425000000	471000000	309000000	354000000	312000000	289000000	283000000	411000000	251000000	235000000	238000000	202000000	230000000	164000000	136000000	399000000	303000000	319000000	1.81:2.00:1.31:1.50:1.33:1.23:1.20:1.75:1.07:1.00:1.01:0.86:0.98:0.70:0.58:1.70:1.29:1.36	402000000	318000000	315000000	225000000	177000000	340000000	1.79:1.41:1.40:1.00:0.78:1.51	85226	LIM domain and actin-binding protein 1 OS=Homo sapiens GN=LIMA1 PE=1 SV=1
3474	9090	O15226|NKRF_HUMAN	85.06	3	2	2	Carbamidomethylation	40200000	42000000	21900000	61600000	166000000	30000000	78500000	28400000	129000000	90900000	185000000	67100000	101000000	176000000	58200000	291000000	236000000	147000000	0.44:0.46:0.24:0.68:1.82:0.33:0.86:0.31:1.42:1.00:2.03:0.74:1.11:1.93:0.64:3.20:2.59:1.61	34700000	145000000	107000000	114000000	112000000	224000000	0.30:1.27:0.93:1.00:0.98:1.96	77673	NF-kappa-B-repressing factor OS=Homo sapiens GN=NKRF PE=1 SV=2
1030	1441	Q99856|ARI3A_HUMAN	84.99	19	9	8	Deamidation (NQ); Phosphorylation (STY); Acetylation (N-term)	168000000	298000000	169000000	287000000	257000000	207000000	224000000	353000000	328000000	433000000	397000000	402000000	310000000	239000000	324000000	528000000	395000000	521000000	0.39:0.69:0.39:0.66:0.59:0.48:0.52:0.82:0.76:1.00:0.92:0.93:0.72:0.55:0.75:1.22:0.91:1.20	212000000	250000000	319000000	410000000	291000000	481000000	0.52:0.61:0.78:1.00:0.71:1.17	62889	AT-rich interactive domain-containing protein 3A OS=Homo sapiens GN=ARID3A PE=1 SV=2
2567	10434	Q13542|4EBP2_HUMAN	84.44	50	2	2	Carbamidomethylation	230000000	233000000	371000000	406000000	341000000	411000000	205000000	443000000	449000000	499000000	465000000	364000000	502000000	528000000	534000000	855000000	867000000	415000000	0.46:0.47:0.74:0.81:0.68:0.82:0.41:0.89:0.90:1.00:0.93:0.73:1.01:1.06:1.07:1.72:1.74:0.83	362000000	437000000	433000000	442000000	521000000	855000000	0.82:0.99:0.98:1.00:1.18:1.93	12939	Eukaryotic translation initiation factor 4E-binding protein 2 OS=Homo sapiens GN=EIF4EBP2 PE=1 SV=1
1150	1928	O95602|RPA1_HUMAN	84.24	4	3	3		230000000	189000000	142000000	113000000	191000000	186000000	134000000	154000000	159000000	187000000	129000000	140000000	123000000	323000000	185000000	526000000	332000000	410000000	1.23:1.01:0.76:0.61:1.02:0.99:0.72:0.83:0.85:1.00:0.69:0.75:0.66:1.73:0.99:2.81:1.78:2.20	187000000	220000000	164000000	175000000	250000000	423000000	1.07:1.26:0.94:1.00:1.43:2.41	194810	DNA-directed RNA polymerase I subunit RPA1 OS=Homo sapiens GN=POLR1A PE=1 SV=2
237	218	Q15181|IPYR_HUMAN	83.7	64	15	15	Acetylation (N-term); Deamidation (NQ); Carbamidomethylation	4560000000	5770000000	4410000000	8540000000	6660000000	3590000000	8470000000	8070000000	6240000000	7910000000	13000000000	8000000000	11700000000	12800000000	8760000000	11200000000	9990000000	9900000000	0.58:0.73:0.56:1.08:0.84:0.45:1.07:1.02:0.79:1.00:1.64:1.01:1.47:1.62:1.11:1.42:1.26:1.25	4910000000	7220000000	7590000000	10600000000	11100000000	10400000000	0.46:0.68:0.71:1.00:1.04:0.97	32660	Inorganic pyrophosphatase OS=Homo sapiens GN=PPA1 PE=1 SV=2
1357	20444	Q96BY6|DOC10_HUMAN	83.59	3	5	5	Phosphorylation (STY); Carbamidomethylation; Deamidation (NQ)	96300000	95900000	92200000	138000000	118000000	145000000	172000000	119000000	113000000	166000000	98000000	125000000	94500000	126000000	84400000	226000000	247000000	169000000	0.58:0.58:0.55:0.83:0.71:0.87:1.03:0.72:0.68:1.00:0.59:0.75:0.57:0.76:0.51:1.36:1.48:1.01	94800000	134000000	135000000	146000000	103000000	214000000	0.65:0.92:0.92:1.00:0.71:1.47	249529	Dedicator of cytokinesis protein 10 OS=Homo sapiens GN=DOCK10 PE=1 SV=3
3253	2701	P86791|CCZ1_HUMAN	83.42	8	3	3	Acetylation (N-term); Deamidation (NQ)	115000000	94200000	187000000	309000000	144000000	254000000	151000000	169000000	164000000	149000000	144000000	121000000	325000000	354000000	215000000	93400000	128000000	63600000	0.77:0.63:1.25:2.07:0.96:1.70:1.01:1.13:1.10:1.00:0.97:0.81:2.18:2.37:1.44:0.62:0.86:0.43	211000000	236000000	161000000	138000000	298000000	149000000	1.53:1.71:1.17:1.00:2.16:1.08	55866	Vacuolar fusion protein CCZ1 homolog OS=Homo sapiens GN=CCZ1 PE=1 SV=1
4193	2889	P62861|RS30_HUMAN	82.73	17	1	1	Acetylation (N-term); Deamidation (NQ)	1080000000	854000000	182000000	1330000000	1170000000	1250000000	543000000	737000000	388000000	849000000	1820000000	519000000	593000000	1030000000	398000000	1130000000	922000000	614000000	1.27:1.01:0.21:1.56:1.38:1.47:0.64:0.87:0.46:1.00:2.14:0.61:0.70:1.21:0.47:1.33:1.09:0.72	958000000	1250000000	661000000	1060000000	703000000	910000000	0.90:1.17:0.62:1.00:0.66:0.86	6648	40S ribosomal protein S30 OS=Homo sapiens GN=FAU PE=1 SV=1
4610	2054	P63173|RL38_HUMAN	82.27	31	2	2	Pyro-glu from Q	369000000	632000000	355000000	754000000	369000000	642000000	781000000	1230000000	708000000	994000000	648000000	737000000	1330000000	875000000	829000000	575000000	1360000000	464000000	0.37:0.64:0.36:0.76:0.37:0.65:0.79:1.24:0.71:1.00:0.65:0.74:1.34:0.88:0.83:0.58:1.36:0.47	452000000	588000000	907000000	793000000	1010000000	798000000	0.57:0.74:1.14:1.00:1.28:1.01	8218	60S ribosomal protein L38 OS=Homo sapiens GN=RPL38 PE=1 SV=2
1731	4039	Q9GZR1|SENP6_HUMAN	82.25	3	2	2	Carbamidomethylation; Phosphorylation (STY); Acetylation (N-term)	7970000	6280000	7190000	878000	680000	608000	92300000	80100000	78200000	82800000	70400000	88200000	3860000	4630000	1690000	97800000	111000000	131000000	0.10:0.08:0.09:0.02:0.02:0.02:1.12:0.97:0.94:1.00:0.85:1.07:0.05:0.06:0.02:1.18:1.34:1.59	7150000	722000	83500000	80500000	3400000	113000000	0.09:0.02:1.04:1.00:0.04:1.41	126146	Sentrin-specific protease 6 OS=Homo sapiens GN=SENP6 PE=1 SV=2
1435	943	P61086|UBE2K_HUMAN	81.59	22	4	3	Carbamidomethylation	165000000	317000000	189000000	373000000	440000000	342000000	403000000	319000000	233000000	419000000	451000000	332000000	381000000	384000000	205000000	571000000	565000000	359000000	0.39:0.76:0.45:0.89:1.05:0.81:0.96:0.76:0.56:1.00:1.08:0.79:0.91:0.92:0.49:1.36:1.35:0.86	269000000	385000000	334000000	406000000	330000000	499000000	0.66:0.95:0.82:1.00:0.81:1.23	22407	Ubiquitin-conjugating enzyme E2 K OS=Homo sapiens GN=UBE2K PE=1 SV=3
6665	10554	P00846|ATP6_HUMAN	81.59	4	1	1		153000000	0	118000000	170000000	164000000	119000000	220000000	236000000	118000000	325000000	336000000	221000000	167000000	128000000	111000000	316000000	307000000	228000000	0.47:0:0.36:0.52:0.50:0.37:0.68:0.72:0.36:1.00:1.03:0.68:0.51:0.39:0.34:0.97:0.94:0.70	136000000	151000000	216000000	294000000	149000000	284000000	0.46:0.51:0.74:1.00:0.51:0.96	24817	ATP synthase subunit a OS=Homo sapiens GN=MT-ATP6 PE=1 SV=1
1976	22081	Q13393|PLD1_HUMAN	81.42	5	3	3		136000000	99900000	104000000	224000000	140000000	198000000	91800000	116000000	86200000	187000000	204000000	199000000	233000000	188000000	193000000	270000000	258000000	231000000	0.73:0.53:0.56:1.20:0.75:1.06:0.49:0.62:0.46:1.00:1.09:1.06:1.25:1.01:1.04:1.45:1.38:1.24	114000000	187000000	97900000	196000000	205000000	253000000	0.58:0.95:0.50:1.00:1.04:1.29	124184	Phospholipase D1 OS=Homo sapiens GN=PLD1 PE=1 SV=1
1040	1285	Q9HAV4|XPO5_HUMAN	81.32	7	7	7	Deamidation (NQ); Phosphorylation (STY); Carbamidomethylation; Acetylation (N-term)	727000000	669000000	546000000	587000000	1010000000	491000000	994000000	1020000000	726000000	754000000	961000000	686000000	579000000	255000000	393000000	1040000000	826000000	927000000	0.97:0.89:0.72:0.78:1.34:0.65:1.32:1.35:0.96:1.00:1.27:0.91:0.77:0.34:0.52:1.38:1.10:1.23	647000000	709000000	912000000	800000000	495000000	931000000	0.81:0.89:1.14:1.00:0.62:1.16	136311	Exportin-5 OS=Homo sapiens GN=XPO5 PE=1 SV=1
1992	847	Q9H2H8|PPIL3_HUMAN	81.27	40	5	5	Acetylation (N-term)	595000000	643000000	473000000	613000000	809000000	532000000	202000000	405000000	270000000	1060000000	359000000	304000000	286000000	326000000	278000000	1290000000	1030000000	673000000	0.56:0.61:0.45:0.58:0.77:0.50:0.19:0.38:0.26:1.00:0.34:0.29:0.27:0.31:0.26:1.22:0.98:0.64	570000000	652000000	292000000	1030000000	297000000	998000000	0.55:0.63:0.28:1.00:0.29:0.96	18155	Peptidyl-prolyl cis-trans isomerase-like 3 OS=Homo sapiens GN=PPIL3 PE=1 SV=1
2589	4440	A8CG34|P121C_HUMAN	81.21	6	3	3		48300000	65500000	46700000	136000000	65500000	74400000	169000000	156000000	97400000	127000000	232000000	104000000	150000000	119000000	97400000	162000000	196000000	63300000	0.38:0.52:0.37:1.07:0.51:0.59:1.33:1.23:0.77:1.00:1.83:0.82:1.18:0.94:0.77:1.28:1.54:0.50	53500000	97000000	141000000	265000000	122000000	177000000	0.20:0.37:0.53:1.00:0.46:0.67	125059	Nuclear envelope pore membrane protein POM 121C OS=Homo sapiens GN=POM121C PE=1 SV=2
569	967	P46379|BAG6_HUMAN	80.46	11	7	7	Phosphorylation (STY); Deamidation (NQ)	356000000	362000000	187000000	667000000	577000000	339000000	362000000	655000000	281000000	531000000	591000000	357000000	675000000	632000000	418000000	665000000	869000000	475000000	0.67:0.68:0.35:1.26:1.09:0.64:0.68:1.23:0.53:1.00:1.11:0.67:1.27:1.19:0.79:1.25:1.64:0.89	335000000	528000000	472000000	493000000	575000000	669000000	0.68:1.07:0.96:1.00:1.17:1.36	119409	Large proline-rich protein BAG6 OS=Homo sapiens GN=BAG6 PE=1 SV=2
4100	32002	Q9P0I2|EMC3_HUMAN	80.34	13	3	2		153000000	168000000	133000000	159000000	73600000	89300000	230000000	266000000	216000000	207000000	233000000	176000000	203000000	209000000	178000000	361000000	352000000	291000000	0.74:0.81:0.64:0.77:0.36:0.43:1.11:1.28:1.04:1.00:1.13:0.85:0.98:1.01:0.86:1.74:1.70:1.41	151000000	107000000	238000000	206000000	197000000	335000000	0.74:0.52:1.16:1.00:0.96:1.63	29952	ER membrane protein complex subunit 3 OS=Homo sapiens GN=EMC3 PE=1 SV=3
381	398	Q16181|SEPT7_HUMAN	80.21	20	7	6	Phosphorylation (STY); Acetylation (N-term); Deamidation (NQ)	2660000000	2390000000	2320000000	2960000000	3160000000	2330000000	1410000000	1360000000	1030000000	1880000000	1720000000	1740000000	1510000000	2130000000	1590000000	2910000000	2700000000	2620000000	1.42:1.27:1.23:1.57:1.68:1.24:0.75:0.73:0.55:1.00:0.92:0.93:0.80:1.13:0.85:1.55:1.44:1.40	2460000000	2820000000	1460000000	1810000000	1810000000	2780000000	1.36:1.56:0.81:1.00:1.00:1.54	50680	Septin-7 OS=Homo sapiens GN=SEPT7 PE=1 SV=2
1456	1190	Q9BWU0|NADAP_HUMAN	80.21	9	4	4	Carbamidomethylation; Phosphorylation (STY); Citrullination	227000000	204000000	229000000	182000000	224000000	76900000	79800000	132000000	79600000	324000000	408000000	164000000	269000000	242000000	158000000	446000000	267000000	283000000	0.70:0.63:0.71:0.56:0.69:0.24:0.25:0.41:0.25:1.00:1.26:0.51:0.83:0.75:0.49:1.38:0.83:0.87	230000000	198000000	105000000	299000000	223000000	332000000	0.77:0.66:0.35:1.00:0.75:1.11	88814	Kanadaptin OS=Homo sapiens GN=SLC4A1AP PE=1 SV=1
409	1079	Q14203|DCTN1_HUMAN	80.13	10	8	8	Carbamidomethylation; Deamidation (NQ)	572000000	383000000	455000000	623000000	670000000	621000000	1200000000	781000000	153000000	597000000	541000000	484000000	639000000	811000000	636000000	784000000	1410000000	930000000	0.96:0.64:0.76:1.04:1.12:1.04:2.01:1.31:0.26:1.00:0.91:0.81:1.07:1.36:1.07:1.31:2.36:1.56	534000000	638000000	920000000	541000000	755000000	1040000000	0.99:1.18:1.70:1.00:1.40:1.93	141694	Dynactin subunit 1 OS=Homo sapiens GN=DCTN1 PE=1 SV=3
1463	3721	Q16787|LAMA3_HUMAN	79.95	1	1	1	Carbamidomethylation; Deamidation (NQ); Phosphorylation (STY)	316000000	320000000	263000000	632000000	828000000	717000000	553000000	733000000	536000000	579000000	756000000	534000000	272000000	294000000	258000000	378000000	160000000	289000000	0.55:0.55:0.45:1.09:1.43:1.24:0.96:1.27:0.93:1.00:1.31:0.92:0.47:0.51:0.45:0.65:0.28:0.50	300000000	726000000	607000000	623000000	275000000	324000000	0.48:1.17:0.98:1.00:0.44:0.52	366650	Laminin subunit alpha-3 OS=Homo sapiens GN=LAMA3 PE=1 SV=2
1257	1546	P25445|TNR6_HUMAN	79.86	24	5	5	Carbamidomethylation; Acetylation (N-term); Deamidation (NQ)	224000000	284000000	293000000	208000000	373000000	274000000	409000000	533000000	694000000	608000000	513000000	582000000	181000000	258000000	238000000	906000000	815000000	771000000	0.37:0.47:0.48:0.34:0.61:0.45:0.67:0.88:1.14:1.00:0.84:0.96:0.30:0.42:0.39:1.49:1.34:1.27	267000000	285000000	545000000	568000000	226000000	830000000	0.47:0.50:0.96:1.00:0.40:1.46	37732	Tumor necrosis factor receptor superfamily member 6 OS=Homo sapiens GN=FAS PE=1 SV=1
454	743	Q14444|CAPR1_HUMAN	79.86	17	8	8	Pyro-glu from Q; Acetylation (N-term); Deamidation (NQ)	1320000000	1220000000	1120000000	1900000000	2160000000	1650000000	1250000000	1260000000	1310000000	2060000000	2630000000	1750000000	1610000000	2160000000	1500000000	3670000000	2980000000	1470000000	0.64:0.60:0.55:0.93:1.05:0.80:0.61:0.61:0.64:1.00:1.28:0.85:0.79:1.05:0.73:1.78:1.45:0.71	1220000000	1910000000	1300000000	2140000000	1760000000	2860000000	0.57:0.89:0.61:1.00:0.82:1.33	78366	Caprin-1 OS=Homo sapiens GN=CAPRIN1 PE=1 SV=2
1764	1167	O00264|PGRC1_HUMAN	79.85	32	5	4	Phosphorylation (STY); Carbamidomethylation	395000000	291000000	349000000	592000000	740000000	546000000	726000000	533000000	471000000	647000000	700000000	536000000	599000000	501000000	412000000	862000000	808000000	617000000	0.61:0.45:0.54:0.91:1.14:0.84:1.12:0.82:0.73:1.00:1.08:0.83:0.93:0.77:0.64:1.33:1.25:0.95	381000000	626000000	648000000	627000000	504000000	762000000	0.61:1.00:1.03:1.00:0.80:1.21	21671	Membrane-associated progesterone receptor component 1 OS=Homo sapiens GN=PGRMC1 PE=1 SV=3
2315	2199	Q99426|TBCB_HUMAN	79.48	30	5	5	Acetylation (N-term); Carbamidomethylation	153000000	162000000	139000000	263000000	305000000	221000000	419000000	234000000	210000000	232000000	294000000	224000000	252000000	213000000	170000000	361000000	369000000	272000000	0.66:0.70:0.60:1.13:1.32:0.95:1.80:1.01:0.91:1.00:1.27:0.96:1.08:0.92:0.73:1.56:1.59:1.17	151000000	263000000	288000000	250000000	211000000	334000000	0.61:1.05:1.15:1.00:0.84:1.34	27326	Tubulin-folding cofactor B OS=Homo sapiens GN=TBCB PE=1 SV=2
57	53	Q6P2Q9|PRP8_HUMAN	79.43	21	32	32	Acetylation (N-term); Carbamidomethylation; Deamidation (NQ); Oxidation (HW)	835000000	1100000000	780000000	1840000000	1390000000	1320000000	1710000000	1690000000	1580000000	1710000000	1720000000	1400000000	1460000000	1760000000	1280000000	2270000000	1960000000	1760000000	0.49:0.64:0.46:1.07:0.81:0.77:1.00:0.99:0.92:1.00:1.00:0.82:0.86:1.03:0.75:1.33:1.15:1.03	913000000	1520000000	1680000000	1610000000	1500000000	2000000000	0.57:0.95:1.04:1.00:0.93:1.24	273599	Pre-mRNA-processing-splicing factor 8 OS=Homo sapiens GN=PRPF8 PE=1 SV=2
617	2171	P35749|MYH11_HUMAN	79.07	2	3	2	Pyro-glu from Q; Acetylation (N-term)	345000000	361000000	188000000	462000000	602000000	370000000	420000000	376000000	268000000	201000000	364000000	146000000	162000000	219000000	103000000	245000000	199000000	181000000	1.71:1.80:0.94:2.30:2.99:1.84:2.09:1.87:1.34:1.00:1.81:0.73:0.81:1.09:0.51:1.22:0.99:0.90	299000000	478000000	355000000	246000000	162000000	208000000	1.22:1.95:1.45:1.00:0.66:0.85	227337	Myosin-11 OS=Homo sapiens GN=MYH11 PE=1 SV=3
621	462	Q9NVA2|SEP11_HUMAN	78.92	17	7	2	Acetylation (N-term); Deamidation (NQ)	45400000	44400000	40900000	96100000	52300000	86700000	19500000	15800000	14900000	75600000	107000000	60800000	30500000	35700000	11400000	101000000	81200000	27600000	0.60:0.59:0.54:1.27:0.69:1.15:0.26:0.21:0.20:1.00:1.41:0.80:0.40:0.47:0.15:1.34:1.07:0.36	43600000	93800000	16700000	81000000	33400000	87600000	0.54:1.16:0.21:1.00:0.41:1.08	49398	Septin-11 OS=Homo sapiens GN=SEPT11 PE=1 SV=3
974	2771	O95613|PCNT_HUMAN	78.61	1	2	2	Carbamidomethylation; Deamidation (NQ)	261000000	451000000	239000000	598000000	262000000	545000000	154000000	287000000	199000000	194000000	306000000	186000000	542000000	458000000	403000000	130000000	191000000	128000000	1.34:2.32:1.23:3.08:1.35:2.80:0.79:1.48:1.02:1.00:1.57:0.96:2.79:2.36:2.07:0.67:0.98:0.66	317000000	468000000	213000000	246000000	468000000	149000000	1.29:1.91:0.87:1.00:1.90:0.61	378039	Pericentrin OS=Homo sapiens GN=PCNT PE=1 SV=4
776	780	Q5TEJ8|THMS2_HUMAN	78.6	21	9	9	Carbamidomethylation; Acetylation (N-term); Deamidation (NQ)	557000000	521000000	269000000	438000000	546000000	244000000	200000000	556000000	233000000	566000000	648000000	251000000	378000000	413000000	244000000	228000000	215000000	143000000	0.98:0.92:0.47:0.77:0.96:0.43:0.35:0.98:0.41:1.00:1.14:0.44:0.67:0.73:0.43:0.40:0.38:0.25	449000000	409000000	378000000	488000000	369000000	196000000	0.92:0.84:0.77:1.00:0.76:0.40	72049	Protein THEMIS2 OS=Homo sapiens GN=THEMIS2 PE=1 SV=1
1102	1656	Q6UB35|C1TM_HUMAN	78.53	6	6	5	Carbamidomethylation; Pyro-glu from Q; Deamidation (NQ); Phosphorylation (STY)	218000000	221000000	173000000	199000000	218000000	148000000	368000000	331000000	156000000	359000000	423000000	290000000	318000000	325000000	229000000	525000000	462000000	357000000	0.61:0.61:0.48:0.55:0.61:0.41:1.02:0.92:0.43:1.00:1.18:0.81:0.88:0.91:0.64:1.46:1.29:0.99	204000000	189000000	285000000	358000000	291000000	448000000	0.57:0.53:0.80:1.00:0.81:1.25	105790	Monofunctional C1-tetrahydrofolate synthase mitochondrial OS=Homo sapiens GN=MTHFD1L PE=1 SV=1
1222	563	P37198|NUP62_HUMAN	78.32	21	7	7	Carbamidomethylation; Acetylation (N-term)	715000000	958000000	782000000	903000000	1190000000	906000000	895000000	1060000000	908000000	1180000000	1240000000	990000000	989000000	890000000	867000000	2160000000	1840000000	1380000000	0.61:0.81:0.66:0.77:1.01:0.77:0.76:0.90:0.77:1.00:1.05:0.84:0.84:0.76:0.74:1.84:1.56:1.17	908000000	1050000000	1020000000	1210000000	1050000000	2130000000	0.75:0.87:0.84:1.00:0.87:1.76	53255	Nuclear pore glycoprotein p62 OS=Homo sapiens GN=NUP62 PE=1 SV=3
455	1140	Q14315|FLNC_HUMAN	78.03	3	7	3	Acetylation (N-term); Deamidation (NQ); Phosphorylation (STY)	48500000	14500000	15500000	60500000	14300000	41400000	68600000	74000000	48400000	110000000	89000000	396000000	110000000	110000000	61100000	137000000	179000000	65600000	0.44:0.13:0.14:0.55:0.13:0.38:0.62:0.67:0.44:1.00:0.81:3.60:1.00:1.00:0.56:1.24:1.63:0.60	26200000	49800000	65500000	198000000	94100000	128000000	0.13:0.25:0.33:1.00:0.47:0.64	291020	Filamin-C OS=Homo sapiens GN=FLNC PE=1 SV=3
3389	2349	Q9NP79|VTA1_HUMAN	77.83	17	3	3	Acetylation (N-term)	1050000000	955000000	477000000	980000000	1410000000	795000000	843000000	1170000000	849000000	1170000000	1430000000	346000000	494000000	464000000	352000000	1440000000	1060000000	1050000000	0.90:0.82:0.41:0.84:1.20:0.68:0.72:1.00:0.72:1.00:1.22:0.29:0.42:0.40:0.30:1.23:0.90:0.90	843000000	1060000000	967000000	983000000	441000000	1180000000	0.86:1.08:0.98:1.00:0.45:1.20	33879	Vacuolar protein sorting-associated protein VTA1 homolog OS=Homo sapiens GN=VTA1 PE=1 SV=1
2507	3165	P53602|MVD1_HUMAN	77.78	8	3	3	Oxidation (M); Deamidation (NQ)	97300000	111000000	72000000	182000000	181000000	116000000	149000000	229000000	130000000	197000000	253000000	145000000	227000000	220000000	166000000	172000000	173000000	160000000	0.49:0.56:0.37:0.92:0.92:0.59:0.76:1.16:0.66:1.00:1.28:0.74:1.15:1.12:0.84:0.87:0.88:0.81	93400000	159000000	169000000	198000000	204000000	168000000	0.47:0.80:0.85:1.00:1.03:0.85	43405	Diphosphomevalonate decarboxylase OS=Homo sapiens GN=MVD PE=1 SV=1
1153	1228	Q9Y450|HBS1L_HUMAN	77.59	8	3	3		104000000	122000000	86200000	127000000	228000000	121000000	115000000	125000000	82500000	239000000	192000000	211000000	142000000	131000000	86400000	254000000	256000000	171000000	0.43:0.51:0.36:0.53:0.95:0.51:0.48:0.52:0.35:1.00:0.81:0.88:0.59:0.55:0.36:1.06:1.07:0.72	107000000	216000000	108000000	214000000	120000000	227000000	0.50:1.01:0.50:1.00:0.56:1.06	75473	HBS1-like protein OS=Homo sapiens GN=HBS1L PE=1 SV=1
72	221	P09972|ALDOC_HUMAN	77.5	50	24	15	Carbamidomethylation; Acetylation (N-term); Deamidation (NQ); Pyro-glu from Q	4470000000	4480000000	4200000000	3670000000	2640000000	3810000000	4500000000	4100000000	2030000000	5930000000	6950000000	4410000000	7840000000	9130000000	6220000000	4530000000	6210000000	3690000000	0.75:0.76:0.71:0.62:0.44:0.64:0.76:0.69:0.34:1.00:1.17:0.74:1.32:1.54:1.05:0.76:1.05:0.62	4410000000	4000000000	3950000000	5980000000	7950000000	4810000000	0.74:0.67:0.66:1.00:1.33:0.80	39456	Fructose-bisphosphate aldolase C OS=Homo sapiens GN=ALDOC PE=1 SV=2
3450	20464	Q9UEY8|ADDG_HUMAN	77.47	8	3	3	Acetylation (N-term); Phosphorylation (STY)	177000000	179000000	142000000	266000000	248000000	185000000	244000000	288000000	205000000	282000000	328000000	256000000	194000000	210000000	167000000	392000000	378000000	317000000	0.63:0.63:0.50:0.94:0.88:0.66:0.86:1.02:0.73:1.00:1.16:0.91:0.69:0.74:0.59:1.39:1.34:1.12	166000000	233000000	245000000	289000000	190000000	362000000	0.57:0.81:0.85:1.00:0.66:1.25	79155	Gamma-adducin OS=Homo sapiens GN=ADD3 PE=1 SV=1
3564	2448	Q8N4Q1|MIA40_HUMAN	77.22	39	3	3	Carbamidomethylation	222000000	328000000	313000000	614000000	447000000	503000000	392000000	485000000	343000000	595000000	502000000	460000000	409000000	616000000	394000000	598000000	845000000	438000000	0.37:0.55:0.53:1.03:0.75:0.84:0.66:0.81:0.58:1.00:0.84:0.77:0.69:1.03:0.66:1.00:1.42:0.74	288000000	567000000	464000000	519000000	493000000	627000000	0.55:1.09:0.89:1.00:0.95:1.21	15996	Mitochondrial intermembrane space import and assembly protein 40 OS=Homo sapiens GN=CHCHD4 PE=1 SV=1
395	545	P16989|YBOX3_HUMAN	76.86	31	8	4	Acetylation (N-term); Deamidation (NQ)	145000000	165000000	40500000	419000000	280000000	136000000	156000000	239000000	150000000	460000000	376000000	323000000	211000000	175000000	100000000	328000000	299000000	135000000	0.32:0.36:0.09:0.91:0.61:0.30:0.34:0.52:0.33:1.00:0.82:0.70:0.46:0.38:0.22:0.71:0.65:0.29	117000000	278000000	183000000	386000000	162000000	254000000	0.30:0.72:0.47:1.00:0.42:0.66	40090	Y-box-binding protein 3 OS=Homo sapiens GN=YBX3 PE=1 SV=4
2122	1490	P54105|ICLN_HUMAN	76.72	16	2	2	Pyro-glu from Q; Deamidation (NQ)	72300000	44700000	81200000	102000000	107000000	83600000	120000000	104000000	152000000	219000000	126000000	141000000	78700000	89400000	57900000	194000000	259000000	96200000	0.33:0.20:0.37:0.46:0.49:0.38:0.55:0.47:0.70:1.00:0.58:0.64:0.36:0.41:0.26:0.89:1.18:0.44	66100000	97300000	125000000	162000000	75300000	183000000	0.41:0.60:0.77:1.00:0.46:1.13	26215	Methylosome subunit pICln OS=Homo sapiens GN=CLNS1A PE=1 SV=1
2551	2034	Q96IU4|ABHEB_HUMAN	76.66	28	4	4	Acetylation (N-term); Deamidation (NQ)	553000000	534000000	380000000	380000000	786000000	372000000	295000000	462000000	294000000	313000000	571000000	274000000	216000000	238000000	220000000	611000000	296000000	429000000	1.77:1.71:1.21:1.22:2.52:1.19:0.94:1.48:0.94:1.00:1.83:0.88:0.69:0.76:0.70:1.96:0.95:1.37	489000000	513000000	350000000	386000000	260000000	542000000	1.27:1.33:0.91:1.00:0.67:1.41	22346	Protein ABHD14B OS=Homo sapiens GN=ABHD14B PE=1 SV=1
1481	1609	P84098|RL19_HUMAN	76.35	14	3	3	Acetylation (N-term); Deamidation (NQ); Citrullination	1210000000	1900000000	698000000	930000000	3560000000	1030000000	5140000000	1210000000	816000000	671000000	2530000000	1000000000	1680000000	945000000	675000000	2020000000	2530000000	2410000000	1.80:2.84:1.04:1.39:5.31:1.54:7.66:1.81:1.22:1.00:3.77:1.49:2.51:1.41:1.01:3.02:3.77:3.60	1270000000	1860000000	2400000000	1400000000	1120000000	2450000000	0.90:1.33:1.71:1.00:0.80:1.75	23466	60S ribosomal protein L19 OS=Homo sapiens GN=RPL19 PE=1 SV=1
2495	2049	Q4V9L6|TM119_HUMAN	75.86	13	2	2	Pyro-glu from Q	341000000	411000000	208000000	308000000	131000000	213000000	161000000	228000000	137000000	146000000	131000000	123000000	167000000	145000000	132000000	244000000	270000000	178000000	2.33:2.82:1.42:2.11:0.90:1.46:1.10:1.56:0.94:1.00:0.90:0.84:1.14:1.00:0.90:1.67:1.85:1.22	320000000	262000000	175000000	143000000	148000000	231000000	2.24:1.84:1.23:1.00:1.04:1.62	29203	Transmembrane protein 119 OS=Homo sapiens GN=TMEM119 PE=1 SV=1
5790	8573	Q8TAK5|GABP2_HUMAN	75.78	3	1	1	Acetylation (N-term); Deamidation (NQ)	298000000	355000000	171000000	1720000000	1230000000	1020000000	134000000	700000000	340000000	1090000000	774000000	811000000	1820000000	870000000	1050000000	714000000	1120000000	401000000	0.27:0.33:0.16:1.58:1.13:0.94:0.12:0.64:0.31:1.00:0.71:0.75:1.68:0.80:0.97:0.66:1.03:0.37	275000000	1350000000	391000000	890000000	1250000000	744000000	0.31:1.52:0.44:1.00:1.40:0.84	48650	GA-binding protein subunit beta-2 OS=Homo sapiens GN=GABPB2 PE=1 SV=1
1348	1231	P40429|RL13A_HUMAN	75.71	27	8	7	Carbamidomethylation; Acetylation (N-term); Deamidation (NQ)	4370000000	4870000000	4600000000	3900000000	5520000000	2890000000	4860000000	5970000000	5270000000	4530000000	4250000000	3360000000	6730000000	6310000000	4960000000	12300000000	10400000000	7230000000	0.96:1.08:1.02:0.86:1.22:0.64:1.07:1.32:1.16:1.00:0.94:0.74:1.48:1.39:1.09:2.72:2.29:1.60	4610000000	4280000000	5410000000	4100000000	6000000000	9970000000	1.13:1.04:1.32:1.00:1.46:2.43	23577	60S ribosomal protein L13a OS=Homo sapiens GN=RPL13A PE=1 SV=2
730	789	P20810|ICAL_HUMAN	75.68	17	7	7	Carbamidomethylation; Deamidation (NQ)	524000000	659000000	388000000	827000000	449000000	573000000	838000000	1020000000	547000000	818000000	856000000	648000000	781000000	648000000	671000000	1150000000	1270000000	977000000	0.64:0.81:0.48:1.01:0.55:0.70:1.02:1.25:0.67:1.00:1.05:0.79:0.96:0.79:0.82:1.40:1.56:1.19	531000000	651000000	801000000	836000000	714000000	1130000000	0.64:0.78:0.96:1.00:0.85:1.36	76573	Calpastatin OS=Homo sapiens GN=CAST PE=1 SV=4
1698	6267	Q9H1A4|APC1_HUMAN	75.65	1	2	2	Phosphorylation (STY)	60900000	51500000	53200000	59000000	68000000	62400000	128000000	124000000	116000000	85300000	89900000	89700000	79200000	89500000	69300000	179000000	126000000	131000000	0.71:0.60:0.62:0.69:0.80:0.73:1.51:1.45:1.36:1.00:1.05:1.05:0.93:1.05:0.81:2.10:1.48:1.54	55200000	63100000	123000000	88300000	79300000	146000000	0.63:0.72:1.39:1.00:0.90:1.65	216498	Anaphase-promoting complex subunit 1 OS=Homo sapiens GN=ANAPC1 PE=1 SV=1
775	573	P05198|IF2A_HUMAN	75.54	37	10	10	Acetylation (N-term); Deamidation (NQ); Carbamidomethylation; Phosphorylation (STY); Oxidation (HW)	499000000	623000000	334000000	818000000	964000000	552000000	952000000	1180000000	966000000	1560000000	1480000000	1250000000	1010000000	1140000000	995000000	1620000000	1480000000	801000000	0.32:0.40:0.21:0.52:0.62:0.35:0.61:0.75:0.62:1.00:0.94:0.80:0.65:0.73:0.64:1.03:0.95:0.51	520000000	822000000	1030000000	1430000000	1050000000	1470000000	0.36:0.58:0.72:1.00:0.73:1.03	36112	Eukaryotic translation initiation factor 2 subunit 1 OS=Homo sapiens GN=EIF2S1 PE=1 SV=3
363	505	Q09028|RBBP4_HUMAN	75.54	46	15	9	Carbamidomethylation; Acetylation (N-term); Deamidation (NQ)	597000000	543000000	364000000	864000000	586000000	819000000	267000000	472000000	311000000	260000000	284000000	248000000	339000000	365000000	317000000	933000000	1040000000	834000000	2.30:2.09:1.40:3.32:2.25:3.15:1.03:1.82:1.20:1.00:1.09:0.95:1.30:1.40:1.22:3.59:3.99:3.21	501000000	756000000	363000000	272000000	340000000	935000000	1.84:2.78:1.33:1.00:1.25:3.44	47656	Histone-binding protein RBBP4 OS=Homo sapiens GN=RBBP4 PE=1 SV=3
160	981	Q5T4S7|UBR4_HUMAN	75.47	3	9	9	Carbamidomethylation; Deamidation (NQ); Phosphorylation (STY); Acetylation (N-term); Oxidation (HW)	618000000	591000000	452000000	1080000000	2630000000	382000000	799000000	955000000	752000000	874000000	922000000	506000000	1010000000	1010000000	570000000	1400000000	1210000000	972000000	0.71:0.68:0.52:1.24:3.01:0.44:0.91:1.09:0.86:1.00:1.06:0.58:1.16:1.16:0.65:1.60:1.39:1.11	585000000	1370000000	835000000	767000000	865000000	1190000000	0.76:1.78:1.09:1.00:1.13:1.56	573849	E3 ubiquitin-protein ligase UBR4 OS=Homo sapiens GN=UBR4 PE=1 SV=1
762	1181	P08567|PLEK_HUMAN	75.44	14	4	4	Carbamidomethylation; Acetylation (N-term); Deamidation (NQ); Pyro-glu from Q	218000000	221000000	186000000	367000000	400000000	261000000	222000000	316000000	209000000	439000000	401000000	383000000	215000000	211000000	157000000	539000000	459000000	351000000	0.50:0.50:0.42:0.84:0.91:0.60:0.51:0.72:0.48:1.00:0.91:0.87:0.49:0.48:0.36:1.23:1.05:0.80	208000000	343000000	256000000	408000000	194000000	478000000	0.51:0.84:0.63:1.00:0.48:1.17	40125	Pleckstrin OS=Homo sapiens GN=PLEK PE=1 SV=3
4038	2055	O15427|MOT4_HUMAN	75.43	10	4	4	Deamidation (NQ)	192000000	164000000	119000000	251000000	200000000	223000000	133000000	135000000	70500000	283000000	185000000	151000000	315000000	348000000	182000000	165000000	354000000	111000000	0.68:0.58:0.42:0.89:0.71:0.79:0.47:0.48:0.25:1.00:0.65:0.53:1.11:1.23:0.64:0.58:1.25:0.39	159000000	225000000	113000000	210000000	282000000	250000000	0.76:1.07:0.54:1.00:1.34:1.19	49469	Monocarboxylate transporter 4 OS=Homo sapiens GN=SLC16A3 PE=1 SV=1
3160	56406	P26010|ITB7_HUMAN	75.43	5	2	2	Carbamidomethylation	44600000	25800000	59700000	69600000	172000000	32000000	40000000	35900000	90800000	97300000	220000000	49900000	72300000	135000000	31700000	292000000	123000000	191000000	0.46:0.26:0.61:0.71:1.76:0.33:0.41:0.37:0.93:1.00:2.26:0.51:0.74:1.38:0.33:3.00:1.27:1.96	54700000	108000000	55600000	151000000	85500000	202000000	0.36:0.72:0.37:1.00:0.57:1.34	86903	Integrin beta-7 OS=Homo sapiens GN=ITGB7 PE=1 SV=1
1708	2563	Q8N7H5|PAF1_HUMAN	75.05	12	4	4		238000000	249000000	176000000	401000000	357000000	260000000	236000000	239000000	154000000	266000000	334000000	209000000	450000000	472000000	360000000	534000000	495000000	399000000	0.89:0.93:0.66:1.51:1.34:0.98:0.89:0.90:0.58:1.00:1.25:0.79:1.69:1.77:1.35:2.01:1.86:1.50	221000000	339000000	217000000	270000000	428000000	476000000	0.82:1.26:0.80:1.00:1.58:1.76	59976	RNA polymerase II-associated factor 1 homolog OS=Homo sapiens GN=PAF1 PE=1 SV=2
545	1440	P50851|LRBA_HUMAN	75.04	3	6	4	Carbamidomethylation; Phosphorylation (STY)	188000000	213000000	198000000	176000000	232000000	157000000	237000000	270000000	265000000	256000000	177000000	188000000	268000000	257000000	209000000	536000000	514000000	241000000	0.74:0.83:0.78:0.69:0.91:0.61:0.93:1.06:1.03:1.00:0.69:0.73:1.05:1.01:0.82:2.10:2.01:0.94	200000000	188000000	257000000	207000000	245000000	430000000	0.97:0.91:1.24:1.00:1.18:2.08	319107	Lipopolysaccharide-responsive and beige-like anchor protein OS=Homo sapiens GN=LRBA PE=1 SV=4
435	675	P46087|NOP2_HUMAN	74.86	11	7	7	Phosphorylation (STY); Pyro-glu from Q	474000000	292000000	259000000	957000000	788000000	620000000	998000000	979000000	381000000	415000000	433000000	493000000	905000000	812000000	489000000	568000000	492000000	422000000	1.14:0.70:0.62:2.31:1.90:1.50:2.41:2.36:0.92:1.00:1.04:1.19:2.18:1.96:1.18:1.37:1.19:1.02	392000000	789000000	908000000	593000000	735000000	515000000	0.66:1.33:1.53:1.00:1.24:0.87	89302	Probable 28S rRNA (cytosine(4447)-C(5))-methyltransferase OS=Homo sapiens GN=NOP2 PE=1 SV=2
2080	2211	O95671|ASML_HUMAN	74.84	6	3	3	Carbamidomethylation	113000000	94400000	79800000	185000000	179000000	148000000	69400000	99200000	69500000	148000000	223000000	100000000	114000000	124000000	77600000	186000000	161000000	147000000	0.76:0.64:0.54:1.25:1.21:1.00:0.47:0.67:0.47:1.00:1.50:0.68:0.77:0.83:0.52:1.25:1.09:0.99	95900000	171000000	79300000	157000000	105000000	171000000	0.61:1.09:0.51:1.00:0.67:1.09	68857	N-acetylserotonin O-methyltransferase-like protein OS=Homo sapiens GN=ASMTL PE=1 SV=3
1920	1294	Q9BY43|CHM4A_HUMAN	74.68	22	3	3		435000000	651000000	431000000	1080000000	1140000000	831000000	664000000	488000000	266000000	1020000000	987000000	616000000	778000000	554000000	475000000	750000000	1320000000	496000000	0.43:0.64:0.42:1.06:1.12:0.82:0.65:0.48:0.26:1.00:0.97:0.60:0.76:0.54:0.47:0.74:1.30:0.49	506000000	1020000000	559000000	874000000	602000000	857000000	0.58:1.16:0.64:1.00:0.69:0.98	25098	Charged multivesicular body protein 4a OS=Homo sapiens GN=CHMP4A PE=1 SV=3
1618	615	P36542|ATPG_HUMAN	74.58	24	8	8	Carbamidomethylation	746000000	564000000	511000000	1260000000	1210000000	719000000	503000000	554000000	424000000	1130000000	701000000	586000000	679000000	708000000	264000000	1460000000	1610000000	743000000	0.66:0.50:0.45:1.11:1.07:0.64:0.45:0.49:0.38:1.00:0.62:0.52:0.60:0.63:0.23:1.29:1.42:0.66	654000000	1060000000	494000000	869000000	623000000	1270000000	0.75:1.22:0.57:1.00:0.72:1.46	32996	ATP synthase subunit gamma mitochondrial OS=Homo sapiens GN=ATP5C1 PE=1 SV=1
622	479	P36871|PGM1_HUMAN	74.4	21	9	9	Carbamidomethylation	323000000	392000000	187000000	389000000	475000000	253000000	405000000	446000000	309000000	423000000	395000000	256000000	575000000	515000000	370000000	828000000	670000000	437000000	0.76:0.93:0.44:0.92:1.12:0.60:0.96:1.05:0.73:1.00:0.93:0.61:1.36:1.22:0.88:1.96:1.58:1.03	327000000	372000000	387000000	358000000	487000000	645000000	0.91:1.04:1.08:1.00:1.36:1.80	61449	Phosphoglucomutase-1 OS=Homo sapiens GN=PGM1 PE=1 SV=3
2323	927	P62750|RL23A_HUMAN	74.28	34	6	6		2340000000	2880000000	1290000000	1960000000	2990000000	1470000000	3720000000	2540000000	1630000000	1700000000	3550000000	1280000000	1410000000	1550000000	723000000	1950000000	1780000000	1300000000	1.38:1.70:0.76:1.16:1.76:0.87:2.19:1.49:0.96:1.00:2.09:0.76:0.83:0.91:0.43:1.15:1.05:0.77	2180000000	2160000000	2640000000	2190000000	1230000000	1720000000	1.00:0.99:1.21:1.00:0.56:0.78	17695	60S ribosomal protein L23a OS=Homo sapiens GN=RPL23A PE=1 SV=1
1717	933	P06753|TPM3_HUMAN	74.15	21	6	4	Acetylation (N-term); Deamidation (NQ)	1490000000	1220000000	1110000000	1600000000	1460000000	1290000000	1100000000	630000000	397000000	2250000000	1740000000	1400000000	1770000000	1730000000	1060000000	3160000000	2920000000	1760000000	0.66:0.54:0.49:0.71:0.65:0.57:0.49:0.28:0.18:1.00:0.78:0.62:0.79:0.77:0.47:1.41:1.30:0.78	1270000000	1470000000	1150000000	1800000000	1520000000	2610000000	0.71:0.81:0.64:1.00:0.85:1.45	32950	Tropomyosin alpha-3 chain OS=Homo sapiens GN=TPM3 PE=1 SV=2
828	1113	P10768|ESTD_HUMAN	73.82	35	8	8	Carbamidomethylation; Deamidation (NQ)	1890000000	2460000000	1380000000	2580000000	2190000000	1970000000	715000000	1490000000	948000000	2220000000	2590000000	1610000000	1770000000	1230000000	938000000	2370000000	2870000000	1530000000	0.85:1.11:0.62:1.17:0.99:0.89:0.32:0.67:0.43:1.00:1.17:0.73:0.80:0.56:0.42:1.07:1.30:0.69	1910000000	2410000000	1080000000	2140000000	1330000000	2320000000	0.89:1.13:0.51:1.00:0.62:1.08	31463	S-formylglutathione hydrolase OS=Homo sapiens GN=ESD PE=1 SV=2
1161	548	Q9UBE0|SAE1_HUMAN	73.76	21	5	5		770000000	764000000	888000000	590000000	411000000	660000000	1180000000	1410000000	962000000	917000000	793000000	916000000	1080000000	836000000	715000000	1230000000	989000000	1190000000	0.84:0.83:0.97:0.64:0.45:0.72:1.29:1.53:1.05:1.00:0.87:1.00:1.18:0.91:0.78:1.34:1.08:1.30	980000000	679000000	1180000000	1040000000	1050000000	1220000000	0.94:0.65:1.14:1.00:1.01:1.18	38450	SUMO-activating enzyme subunit 1 OS=Homo sapiens GN=SAE1 PE=1 SV=1
1573	1533	Q7L2J0|MEPCE_HUMAN	73.64	14	4	4	Phosphorylation (STY); Carbamidomethylation	179000000	170000000	181000000	308000000	379000000	267000000	222000000	212000000	231000000	197000000	125000000	134000000	265000000	230000000	161000000	408000000	386000000	337000000	0.91:0.86:0.92:1.56:1.92:1.36:1.12:1.07:1.17:1.00:0.64:0.68:1.35:1.17:0.81:2.07:1.96:1.71	176000000	318000000	221000000	152000000	219000000	377000000	1.16:2.09:1.45:1.00:1.44:2.48	74355	7SK snRNA methylphosphate capping enzyme OS=Homo sapiens GN=MEPCE PE=1 SV=1
1057	1069	Q12996|CSTF3_HUMAN	73.63	14	7	7	Acetylation (N-term); Carbamidomethylation	498000000	623000000	589000000	692000000	527000000	788000000	686000000	969000000	829000000	970000000	1220000000	921000000	686000000	646000000	696000000	1140000000	1190000000	1320000000	0.51:0.64:0.61:0.71:0.54:0.81:0.71:1.00:0.85:1.00:1.26:0.95:0.71:0.67:0.72:1.18:1.22:1.37	628000000	730000000	880000000	1110000000	753000000	1460000000	0.57:0.66:0.79:1.00:0.68:1.31	82922	Cleavage stimulation factor subunit 3 OS=Homo sapiens GN=CSTF3 PE=1 SV=1
874	1172	Q13442|HAP28_HUMAN	73.6	31	6	6	Phosphorylation (STY); Deamidation (NQ); Pyro-glu from Q	808000000	824000000	781000000	1020000000	1170000000	919000000	1170000000	760000000	722000000	1360000000	672000000	1110000000	1070000000	664000000	589000000	1690000000	2040000000	1420000000	0.60:0.61:0.58:0.75:0.87:0.68:0.87:0.56:0.53:1.00:0.50:0.82:0.79:0.49:0.43:1.25:1.51:1.05	804000000	1040000000	1130000000	1050000000	954000000	1720000000	0.77:0.99:1.08:1.00:0.91:1.64	20630	28 kDa heat- and acid-stable phosphoprotein OS=Homo sapiens GN=PDAP1 PE=1 SV=1
810	1001	P40763|STAT3_HUMAN	73.42	14	6	6	Deamidation (NQ); Carbamidomethylation; Acetylation (N-term)	669000000	719000000	646000000	1070000000	793000000	944000000	556000000	485000000	274000000	1110000000	1430000000	848000000	905000000	791000000	764000000	999000000	1550000000	500000000	0.60:0.65:0.58:0.96:0.71:0.85:0.50:0.44:0.25:1.00:1.28:0.76:0.81:0.71:0.69:0.90:1.39:0.45	678000000	935000000	569000000	1130000000	820000000	1150000000	0.60:0.83:0.50:1.00:0.73:1.02	88068	Signal transducer and activator of transcription 3 OS=Homo sapiens GN=STAT3 PE=1 SV=2
893	1745	Q9H1B7|I2BPL_HUMAN	73.42	7	3	2	Phosphorylation (STY); Carbamidomethylation	90500000	85700000	68700000	88200000	66100000	56600000	98200000	126000000	60100000	71400000	96400000	70900000	88100000	86700000	68500000	180000000	140000000	202000000	1.27:1.20:0.96:1.23:0.93:0.79:1.37:1.77:0.84:1.00:1.35:0.99:1.23:1.21:0.96:2.53:1.97:2.82	81600000	70300000	94900000	79600000	81100000	174000000	1.03:0.88:1.19:1.00:1.02:2.19	82659	Interferon regulatory factor 2-binding protein-like OS=Homo sapiens GN=IRF2BPL PE=1 SV=1
4721	2800	Q9BWJ5|SF3B5_HUMAN	72.95	15	1	1		840000000	499000000	657000000	309000000	467000000	555000000	172000000	388000000	163000000	686000000	875000000	490000000	605000000	485000000	448000000	687000000	244000000	467000000	1.22:0.73:0.96:0.45:0.68:0.81:0.25:0.57:0.24:1.00:1.28:0.71:0.88:0.71:0.65:1.00:0.36:0.68	665000000	444000000	241000000	684000000	513000000	466000000	0.97:0.65:0.35:1.00:0.75:0.68	10135	Splicing factor 3B subunit 5 OS=Homo sapiens GN=SF3B5 PE=1 SV=1
1021	576	P30046|DOPD_HUMAN	72.94	62	8	8	Carbamidomethylation	4430000000	4110000000	3180000000	4200000000	3700000000	3510000000	1930000000	1850000000	1580000000	4570000000	3760000000	3560000000	2420000000	2330000000	1800000000	3150000000	3010000000	2850000000	0.97:0.90:0.70:0.92:0.81:0.77:0.42:0.40:0.35:1.00:0.82:0.78:0.53:0.51:0.39:0.69:0.66:0.62	3910000000	3800000000	1790000000	3960000000	2180000000	3000000000	0.99:0.96:0.45:1.00:0.55:0.76	12712	D-dopachrome decarboxylase OS=Homo sapiens GN=DDT PE=1 SV=3
2188	1739	Q9BZE1|RM37_HUMAN	72.87	16	4	4	Carbamidomethylation	356000000	347000000	274000000	386000000	486000000	309000000	352000000	382000000	254000000	314000000	411000000	149000000	273000000	343000000	214000000	589000000	970000000	520000000	1.13:1.11:0.87:1.23:1.55:0.98:1.12:1.22:0.81:1.00:1.31:0.48:0.87:1.09:0.68:1.88:3.09:1.66	326000000	394000000	330000000	326000000	277000000	781000000	1.00:1.21:1.01:1.00:0.85:2.40	48118	39S ribosomal protein L37 mitochondrial OS=Homo sapiens GN=MRPL37 PE=1 SV=2
3841	21334	Q05655|KPCD_HUMAN	72.67	7	3	3	Deamidation (NQ); Carbamidomethylation	302000000	280000000	163000000	290000000	234000000	151000000	319000000	345000000	193000000	307000000	293000000	175000000	156000000	169000000	77800000	417000000	397000000	208000000	0.98:0.91:0.53:0.94:0.76:0.49:1.04:1.12:0.63:1.00:0.95:0.57:0.51:0.55:0.25:1.36:1.29:0.68	248000000	225000000	286000000	258000000	134000000	341000000	0.96:0.87:1.10:1.00:0.52:1.32	77505	Protein kinase C delta type OS=Homo sapiens GN=PRKCD PE=1 SV=2
1499	907	P37268|FDFT_HUMAN	72.6	18	6	6	Carbamidomethylation	636000000	741000000	531000000	590000000	705000000	578000000	880000000	750000000	686000000	720000000	591000000	575000000	1070000000	1080000000	765000000	1540000000	1410000000	1100000000	0.88:1.03:0.74:0.82:0.98:0.80:1.22:1.04:0.95:1.00:0.82:0.80:1.49:1.50:1.06:2.14:1.96:1.53	636000000	664000000	772000000	629000000	974000000	1350000000	1.01:1.06:1.23:1.00:1.55:2.15	48115	Squalene synthase OS=Homo sapiens GN=FDFT1 PE=1 SV=1
1381	1308	Q9NUQ6|SPS2L_HUMAN	72.42	11	4	4	Carbamidomethylation; Acetylation (N-term)	219000000	248000000	197000000	389000000	318000000	254000000	239000000	147000000	180000000	507000000	284000000	389000000	395000000	246000000	236000000	513000000	582000000	316000000	0.43:0.49:0.39:0.77:0.63:0.50:0.47:0.29:0.36:1.00:0.56:0.77:0.78:0.48:0.46:1.01:1.15:0.62	221000000	324000000	189000000	394000000	295000000	470000000	0.56:0.82:0.48:1.00:0.75:1.19	61729	SPATS2-like protein OS=Homo sapiens GN=SPATS2L PE=1 SV=2
2236	4144	Q9BXS6|NUSAP_HUMAN	72.05	7	2	2	Deamidation (NQ)	15900000	15800000	33000000	108000000	84300000	44100000	3570000	14600000	241000000	94000000	518000000	19400000	39200000	42600000	8170000	60500000	45000000	31500000	0.17:0.17:0.35:1.14:0.90:0.47:0.04:0.16:2.56:1.00:5.51:0.21:0.42:0.45:0.09:0.64:0.48:0.34	21600000	78700000	241000000	462000000	34800000	51100000	0.05:0.17:0.52:1.00:0.08:0.11	49452	Nucleolar and spindle-associated protein 1 OS=Homo sapiens GN=NUSAP1 PE=1 SV=1
3186	1510	O60220|TIM8A_HUMAN	71.95	34	3	3	Carbamidomethylation; Deamidation (NQ)	680000000	776000000	653000000	1030000000	1230000000	797000000	525000000	376000000	600000000	1310000000	1120000000	931000000	752000000	691000000	562000000	1750000000	1590000000	1120000000	0.52:0.59:0.50:0.79:0.94:0.61:0.40:0.29:0.46:1.00:0.86:0.71:0.58:0.53:0.43:1.34:1.21:0.86	703000000	1020000000	500000000	1130000000	669000000	1490000000	0.62:0.90:0.44:1.00:0.59:1.31	10998	Mitochondrial import inner membrane translocase subunit Tim8 A OS=Homo sapiens GN=TIMM8A PE=1 SV=1
2454	2224	Q15910|EZH2_HUMAN	71.87	11	5	5	Carbamidomethylation	166000000	236000000	151000000	205000000	279000000	98600000	223000000	225000000	148000000	267000000	396000000	196000000	269000000	340000000	194000000	501000000	341000000	329000000	0.62:0.89:0.57:0.77:1.04:0.37:0.84:0.84:0.55:1.00:1.48:0.73:1.01:1.27:0.73:1.88:1.28:1.23	185000000	205000000	215000000	286000000	272000000	390000000	0.64:0.72:0.75:1.00:0.95:1.36	85363	Histone-lysine N-methyltransferase EZH2 OS=Homo sapiens GN=EZH2 PE=1 SV=2
1601	1881	Q14677|EPN4_HUMAN	71.82	14	6	6	Phosphorylation (STY)	196000000	237000000	156000000	377000000	266000000	339000000	101000000	172000000	191000000	305000000	375000000	237000000	210000000	331000000	232000000	361000000	385000000	304000000	0.64:0.78:0.51:1.24:0.87:1.11:0.33:0.57:0.63:1.00:1.23:0.78:0.69:1.08:0.76:1.18:1.26:1.00	196000000	377000000	205000000	305000000	292000000	350000000	0.64:1.23:0.67:1.00:0.96:1.14	68259	Clathrin interactor 1 OS=Homo sapiens GN=CLINT1 PE=1 SV=1
1024	1605	P30613|KPYR_HUMAN	71.47	13	7	4	Deamidation (NQ); Carbamidomethylation	385000000	2110000000	1900000000	413000000	3090000000	770000000	3010000000	2590000000	2120000000	430000000	1430000000	190000000	1820000000	717000000	1130000000	409000000	2010000000	161000000	0.90:4.92:4.42:0.96:7.19:1.79:7.01:6.04:4.94:1.00:3.33:0.44:4.23:1.67:2.63:0.95:4.67:0.38	2260000000	3470000000	2580000000	1130000000	1710000000	1140000000	2.01:3.09:2.29:1.00:1.52:1.02	61830	Pyruvate kinase PKLR OS=Homo sapiens GN=PKLR PE=1 SV=2
1588	1373	P10644|KAP0_HUMAN	71.31	19	7	7	Acetylation (N-term); Phosphorylation (STY)	416000000	415000000	346000000	593000000	553000000	424000000	637000000	598000000	493000000	770000000	784000000	727000000	398000000	502000000	364000000	960000000	872000000	650000000	0.54:0.54:0.45:0.77:0.72:0.55:0.83:0.78:0.64:1.00:1.02:0.94:0.52:0.65:0.47:1.25:1.13:0.84	396000000	523000000	576000000	760000000	447000000	849000000	0.52:0.69:0.76:1.00:0.59:1.12	42982	cAMP-dependent protein kinase type I-alpha regulatory subunit OS=Homo sapiens GN=PRKAR1A PE=1 SV=1
1662	786	Q13573|SNW1_HUMAN	71.29	19	6	6	Acetylation (N-term); Phosphorylation (STY)	252000000	295000000	286000000	288000000	416000000	252000000	278000000	399000000	335000000	423000000	486000000	280000000	468000000	624000000	481000000	569000000	824000000	364000000	0.59:0.70:0.68:0.68:0.98:0.60:0.66:0.94:0.79:1.00:1.15:0.66:1.11:1.47:1.14:1.34:1.95:0.86	278000000	319000000	337000000	396000000	524000000	586000000	0.70:0.80:0.85:1.00:1.32:1.48	61495	SNW domain-containing protein 1 OS=Homo sapiens GN=SNW1 PE=1 SV=1
2341	2079	P67870|CSK2B_HUMAN	71.16	18	4	4	Carbamidomethylation; Deamidation (NQ)	359000000	495000000	193000000	659000000	415000000	470000000	570000000	712000000	451000000	879000000	482000000	596000000	810000000	587000000	528000000	636000000	1170000000	397000000	0.41:0.56:0.22:0.75:0.47:0.53:0.65:0.81:0.51:1.00:0.55:0.68:0.92:0.67:0.60:0.72:1.33:0.45	349000000	515000000	578000000	653000000	642000000	1440000000	0.53:0.79:0.89:1.00:0.98:2.21	24942	Casein kinase II subunit beta OS=Homo sapiens GN=CSNK2B PE=1 SV=1
486	594	P18583|SON_HUMAN	70.85	6	10	9	Carbamidomethylation; Acetylation (N-term); Phosphorylation (STY)	434000000	480000000	362000000	492000000	469000000	332000000	576000000	684000000	541000000	609000000	580000000	520000000	609000000	587000000	518000000	1000000000	853000000	827000000	0.71:0.79:0.59:0.81:0.77:0.55:0.95:1.12:0.89:1.00:0.95:0.85:1.00:0.96:0.85:1.65:1.40:1.36	425000000	431000000	601000000	570000000	571000000	895000000	0.75:0.76:1.05:1.00:1.00:1.57	263827	Protein SON OS=Homo sapiens GN=SON PE=1 SV=4
1041	733	Q8NBS9|TXND5_HUMAN	70.79	19	6	6	Carbamidomethylation; Acetylation (N-term); Phosphorylation (STY)	398000000	353000000	216000000	495000000	585000000	440000000	172000000	324000000	227000000	350000000	510000000	220000000	356000000	450000000	233000000	708000000	518000000	507000000	1.14:1.01:0.62:1.42:1.67:1.26:0.49:0.93:0.65:1.00:1.46:0.63:1.02:1.29:0.67:2.02:1.48:1.45	322000000	507000000	241000000	360000000	346000000	578000000	0.90:1.41:0.67:1.00:0.96:1.61	47629	Thioredoxin domain-containing protein 5 OS=Homo sapiens GN=TXNDC5 PE=1 SV=2
642	1141	P16401|H15_HUMAN	70.76	23	5	5	Acetylation (N-term); Deamidation (NQ); Phosphorylation (STY)	1340000000	1690000000	2430000000	3240000000	1640000000	1760000000	2890000000	1720000000	2810000000	11900000000	4100000000	6410000000	2820000000	2780000000	1410000000	3650000000	6150000000	1680000000	0.11:0.14:0.21:0.27:0.14:0.15:0.24:0.14:0.24:1.00:0.35:0.54:0.24:0.23:0.12:0.31:0.52:0.14	1830000000	2210000000	2550000000	7450000000	2340000000	3830000000	0.25:0.30:0.34:1.00:0.31:0.51	22580	Histone H1.5 OS=Homo sapiens GN=HIST1H1B PE=1 SV=3
4826	2927	Q8IWT0|ARCH_HUMAN	70.52	16	2	2	Acetylation (N-term)	48100000	59300000	115000000	164000000	263000000	81100000	106000000	35700000	89000000	14800000	86800000	96800000	143000000	119000000	136000000	168000000	205000000	45800000	3.24:4.00:7.74:11.08:17.74:5.47:7.18:2.40:6.00:1.00:5.85:6.53:9.63:8.00:9.18:11.33:13.79:3.08	127000000	208000000	103000000	91100000	133000000	183000000	1.39:2.28:1.13:1.00:1.46:2.01	19491	Protein archease OS=Homo sapiens GN=ZBTB8OS PE=1 SV=2
899	2133	O15042|SR140_HUMAN	70.44	10	6	6	Carbamidomethylation; Citrullination	880000000	802000000	706000000	1080000000	637000000	990000000	542000000	600000000	311000000	1410000000	981000000	564000000	1380000000	890000000	776000000	1550000000	1580000000	793000000	0.62:0.57:0.50:0.77:0.45:0.70:0.38:0.43:0.22:1.00:0.69:0.40:0.98:0.63:0.55:1.10:1.12:0.56	796000000	902000000	537000000	985000000	1020000000	1310000000	0.81:0.92:0.54:1.00:1.03:1.33	118292	U2 snRNP-associated SURP motif-containing protein OS=Homo sapiens GN=U2SURP PE=1 SV=2
3208	1841	Q15554|TERF2_HUMAN	70.22	8	3	3	Phosphorylation (STY); Carbamidomethylation	471000000	558000000	915000000	1570000000	790000000	814000000	455000000	521000000	537000000	495000000	1020000000	671000000	567000000	656000000	1030000000	867000000	676000000	971000000	0.95:1.13:1.85:3.16:1.59:1.64:0.92:1.05:1.08:1.00:2.06:1.35:1.14:1.32:2.08:1.75:1.36:1.96	648000000	1060000000	504000000	730000000	751000000	838000000	0.89:1.45:0.69:1.00:1.03:1.15	59594	Telomeric repeat-binding factor 2 OS=Homo sapiens GN=TERF2 PE=1 SV=3
620	379	Q9UHD8|SEPT9_HUMAN	70.19	20	10	10	Deamidation (NQ); Acetylation (N-term)	1460000000	1610000000	1300000000	1990000000	2920000000	1630000000	1100000000	1420000000	1090000000	1870000000	1800000000	1290000000	1780000000	1600000000	1420000000	3540000000	3200000000	2420000000	0.78:0.86:0.69:1.07:1.56:0.87:0.59:0.76:0.58:1.00:0.96:0.69:0.95:0.85:0.76:1.89:1.71:1.29	1460000000	2180000000	1210000000	1650000000	1600000000	3050000000	0.88:1.32:0.73:1.00:0.97:1.85	65402	Septin-9 OS=Homo sapiens GN=SEPT9 PE=1 SV=2
2504	2117	Q96CT7|CC124_HUMAN	70.14	12	2	2		201000000	154000000	231000000	320000000	452000000	278000000	208000000	166000000	174000000	367000000	625000000	203000000	249000000	290000000	154000000	604000000	400000000	337000000	0.55:0.42:0.63:0.87:1.23:0.76:0.57:0.45:0.47:1.00:1.70:0.55:0.68:0.79:0.42:1.65:1.09:0.92	195000000	377000000	193000000	459000000	269000000	447000000	0.43:0.82:0.42:1.00:0.59:0.97	25835	Coiled-coil domain-containing protein 124 OS=Homo sapiens GN=CCDC124 PE=1 SV=1
2165	2213	Q1ED39|KNOP1_HUMAN	70.07	15	4	4	Carbamidomethylation; Acetylation (N-term); Phosphorylation (STY); Oxidation (HW)	648000000	877000000	419000000	928000000	691000000	783000000	1010000000	1090000000	687000000	912000000	844000000	784000000	1090000000	1170000000	843000000	1300000000	1820000000	953000000	0.71:0.96:0.46:1.02:0.76:0.86:1.11:1.20:0.75:1.00:0.93:0.86:1.19:1.29:0.92:1.43:1.99:1.04	687000000	862000000	929000000	847000000	1040000000	1360000000	0.81:1.02:1.10:1.00:1.22:1.60	51589	Lysine-rich nucleolar protein 1 OS=Homo sapiens GN=KNOP1 PE=1 SV=1
1431	1676	Q8TBC4|UBA3_HUMAN	69.67	18	6	6	Carbamidomethylation	500000000	537000000	420000000	693000000	816000000	454000000	618000000	612000000	483000000	864000000	756000000	569000000	806000000	684000000	416000000	1170000000	1160000000	715000000	0.58:0.62:0.49:0.80:0.94:0.53:0.72:0.71:0.56:1.00:0.87:0.66:0.93:0.79:0.48:1.35:1.34:0.83	486000000	654000000	571000000	730000000	636000000	1010000000	0.67:0.90:0.78:1.00:0.87:1.39	51852	NEDD8-activating enzyme E1 catalytic subunit OS=Homo sapiens GN=UBA3 PE=1 SV=2
1445	1561	P62993|GRB2_HUMAN	69.51	29	5	5	Carbamidomethylation	848000000	960000000	605000000	1200000000	900000000	879000000	543000000	548000000	335000000	938000000	938000000	663000000	684000000	588000000	453000000	883000000	932000000	628000000	0.90:1.02:0.65:1.27:0.96:0.94:0.58:0.58:0.36:1.00:1.00:0.71:0.73:0.63:0.48:0.94:0.99:0.67	805000000	992000000	475000000	846000000	575000000	814000000	0.95:1.17:0.56:1.00:0.68:0.96	25206	Growth factor receptor-bound protein 2 OS=Homo sapiens GN=GRB2 PE=1 SV=1
744	1211	Q15435|PP1R7_HUMAN	69.51	31	7	7	Acetylation (N-term); Deamidation (NQ); Phosphorylation (STY)	698000000	780000000	421000000	885000000	1400000000	818000000	802000000	994000000	725000000	1080000000	991000000	939000000	677000000	823000000	566000000	1510000000	1110000000	1350000000	0.65:0.72:0.39:0.82:1.29:0.76:0.74:0.92:0.67:1.00:0.92:0.87:0.63:0.76:0.52:1.39:1.02:1.25	633000000	1030000000	866000000	1000000000	738000000	1320000000	0.63:1.03:0.86:1.00:0.73:1.32	41564	Protein phosphatase 1 regulatory subunit 7 OS=Homo sapiens GN=PPP1R7 PE=1 SV=1
1315	1413	P29218|IMPA1_HUMAN	69.41	27	6	6	Carbamidomethylation; Acetylation (N-term); Oxidation (M); Deamidation (NQ); Pyro-glu from Q	417000000	484000000	248000000	713000000	575000000	558000000	477000000	719000000	440000000	775000000	536000000	635000000	759000000	488000000	528000000	828000000	1010000000	561000000	0.54:0.62:0.32:0.92:0.74:0.72:0.62:0.93:0.57:1.00:0.69:0.82:0.98:0.63:0.68:1.07:1.30:0.72	383000000	652000000	545000000	649000000	592000000	881000000	0.59:1.00:0.84:1.00:0.91:1.36	30189	Inositol monophosphatase 1 OS=Homo sapiens GN=IMPA1 PE=1 SV=1
289	538	O15067|PUR4_HUMAN	69.12	16	15	15	Carbamidomethylation; Oxidation (HW); Pyro-glu from E	654000000	559000000	418000000	659000000	1640000000	659000000	977000000	672000000	1230000000	917000000	808000000	734000000	973000000	1230000000	591000000	1380000000	1120000000	901000000	0.71:0.61:0.46:0.72:1.79:0.72:1.07:0.73:1.35:1.00:0.88:0.80:1.06:1.34:0.64:1.51:1.22:0.98	544000000	986000000	961000000	819000000	1060000000	1130000000	0.66:1.20:1.17:1.00:1.29:1.38	144734	Phosphoribosylformylglycinamidine synthase OS=Homo sapiens GN=PFAS PE=1 SV=4
3441	2595	P19784|CSK22_HUMAN	68.94	8	2	2		233000000	338000000	111000000	340000000	217000000	289000000	175000000	231000000	238000000	391000000	229000000	300000000	395000000	306000000	266000000	472000000	605000000	339000000	0.60:0.86:0.28:0.87:0.56:0.74:0.45:0.59:0.61:1.00:0.59:0.77:1.01:0.78:0.68:1.21:1.55:0.87	227000000	282000000	289000000	307000000	322000000	472000000	0.74:0.92:0.94:1.00:1.05:1.54	41213	Casein kinase II subunit alpha' OS=Homo sapiens GN=CSNK2A2 PE=1 SV=1
348	266	P05141|ADT2_HUMAN	68.82	36	15	5	Carbamidomethylation; Acetylation (N-term); Deamidation (NQ)	2430000000	2510000000	2360000000	3190000000	3110000000	2730000000	3500000000	3330000000	3410000000	6970000000	4790000000	4670000000	2340000000	2960000000	2230000000	5380000000	5840000000	3970000000	0.35:0.36:0.34:0.46:0.45:0.39:0.50:0.48:0.49:1.00:0.69:0.67:0.34:0.42:0.32:0.77:0.84:0.57	2450000000	3020000000	3410000000	5480000000	2610000000	5060000000	0.45:0.55:0.62:1.00:0.48:0.92	32852	ADP/ATP translocase 2 OS=Homo sapiens GN=SLC25A5 PE=1 SV=7
487	988	Q13423|NNTM_HUMAN	68.79	18	15	15	Carbamidomethylation; Deamidation (NQ)	332000000	416000000	247000000	414000000	383000000	269000000	443000000	598000000	364000000	538000000	519000000	359000000	628000000	471000000	354000000	735000000	867000000	465000000	0.62:0.77:0.46:0.77:0.71:0.50:0.82:1.11:0.68:1.00:0.97:0.67:1.17:0.88:0.66:1.37:1.61:0.86	332000000	355000000	469000000	472000000	484000000	689000000	0.70:0.75:0.99:1.00:1.03:1.46	113895	NAD(P) transhydrogenase mitochondrial OS=Homo sapiens GN=NNT PE=1 SV=3
705	434	O95202|LETM1_HUMAN	68.64	16	10	10	Acetylation (N-term); Deamidation (NQ); Phosphorylation (STY)	945000000	1040000000	514000000	1520000000	1640000000	928000000	1930000000	1390000000	1050000000	1240000000	1260000000	1060000000	1970000000	1810000000	1430000000	1800000000	1460000000	1260000000	0.76:0.84:0.41:1.22:1.32:0.75:1.55:1.12:0.85:1.00:1.01:0.85:1.58:1.45:1.15:1.44:1.17:1.01	925000000	1360000000	1460000000	1190000000	1730000000	1510000000	0.78:1.15:1.23:1.00:1.46:1.27	83354	LETM1 and EF-hand domain-containing protein 1 mitochondrial OS=Homo sapiens GN=LETM1 PE=1 SV=1
1527	2654	Q6SZW1|SARM1_HUMAN	68.33	9	4	4		98500000	150000000	132000000	151000000	234000000	130000000	155000000	174000000	177000000	161000000	144000000	119000000	130000000	163000000	130000000	343000000	229000000	220000000	0.61:0.93:0.82:0.94:1.46:0.81:0.96:1.08:1.10:1.00:0.89:0.74:0.81:1.01:0.81:2.13:1.42:1.37	147000000	171000000	169000000	141000000	141000000	264000000	1.05:1.21:1.20:1.00:1.00:1.87	79388	Sterile alpha and TIR motif-containing protein 1 OS=Homo sapiens GN=SARM1 PE=1 SV=1
1953	5069	Q99986|VRK1_HUMAN	68.28	16	3	3	Carbamidomethylation	255000000	254000000	201000000	268000000	380000000	192000000	131000000	230000000	188000000	205000000	283000000	137000000	217000000	230000000	188000000	510000000	505000000	455000000	1.24:1.24:0.98:1.31:1.86:0.94:0.64:1.12:0.92:1.00:1.38:0.67:1.06:1.12:0.92:2.49:2.46:2.22	237000000	280000000	183000000	208000000	238000000	526000000	1.14:1.35:0.88:1.00:1.14:2.53	45476	Serine/threonine-protein kinase VRK1 OS=Homo sapiens GN=VRK1 PE=1 SV=1
3213	3707	Q2M1P5|KIF7_HUMAN	68.28	1	1	1	Carbamidomethylation	215000000	372000000	243000000	433000000	153000000	355000000	365000000	440000000	377000000	361000000	302000000	354000000	303000000	269000000	238000000	676000000	692000000	353000000	0.60:1.03:0.67:1.20:0.42:0.99:1.01:1.22:1.05:1.00:0.84:0.98:0.84:0.75:0.66:1.88:1.92:0.98	277000000	314000000	394000000	339000000	273000000	574000000	0.82:0.93:1.16:1.00:0.81:1.69	150587	Kinesin-like protein KIF7 OS=Homo sapiens GN=KIF7 PE=1 SV=2
307	235	P35241|RADI_HUMAN	68.17	22	14	4	Pyro-glu from Q; Deamidation (NQ); Oxidation (M)	239000000	235000000	289000000	382000000	342000000	334000000	438000000	366000000	354000000	508000000	351000000	476000000	370000000	235000000	293000000	480000000	675000000	454000000	0.47:0.46:0.57:0.75:0.67:0.66:0.86:0.72:0.70:1.00:0.69:0.94:0.73:0.46:0.58:0.95:1.33:0.89	283000000	360000000	461000000	460000000	301000000	555000000	0.62:0.78:1.00:1.00:0.65:1.21	68564	Radixin OS=Homo sapiens GN=RDX PE=1 SV=1
3324	2041	P56182|RRP1_HUMAN	68.15	8	3	3	Carbamidomethylation	252000000	177000000	213000000	456000000	441000000	173000000	262000000	264000000	219000000	250000000	282000000	223000000	399000000	441000000	309000000	504000000	414000000	413000000	1.01:0.71:0.85:1.83:1.77:0.69:1.05:1.06:0.88:1.00:1.13:0.89:1.60:1.77:1.24:2.02:1.66:1.65	243000000	407000000	248000000	252000000	383000000	454000000	0.96:1.61:0.98:1.00:1.52:1.80	52839	Ribosomal RNA processing protein 1 homolog A OS=Homo sapiens GN=RRP1 PE=1 SV=1
1513	1138	Q9NQP4|PFD4_HUMAN	68.15	20	2	2		743000000	826000000	656000000	950000000	1510000000	754000000	770000000	916000000	911000000	990000000	866000000	936000000	759000000	1200000000	839000000	1710000000	1630000000	1270000000	0.75:0.83:0.66:0.96:1.53:0.76:0.78:0.93:0.92:1.00:0.88:0.95:0.77:1.21:0.85:1.72:1.65:1.28	773000000	1070000000	866000000	931000000	933000000	1540000000	0.83:1.15:0.93:1.00:1.00:1.65	15314	Prefoldin subunit 4 OS=Homo sapiens GN=PFDN4 PE=1 SV=1
4492	3020	P14406|CX7A2_HUMAN	68.13	16	1	1	Acetylation (N-term); Deamidation (NQ)	674000000	697000000	603000000	511000000	680000000	453000000	1390000000	775000000	767000000	777000000	853000000	662000000	774000000	796000000	540000000	1510000000	1500000000	1070000000	0.87:0.90:0.78:0.66:0.87:0.58:1.79:1.00:0.99:1.00:1.10:0.85:1.00:1.02:0.70:1.95:1.93:1.38	658000000	548000000	979000000	764000000	703000000	1360000000	0.86:0.72:1.28:1.00:0.92:1.78	9396	Cytochrome c oxidase subunit 7A2 mitochondrial OS=Homo sapiens GN=COX7A2 PE=1 SV=1
2233	24146	Q86TG7|PEG10_HUMAN	68.08	7	3	3	Carbamidomethylation	142000000	173000000	136000000	187000000	237000000	112000000	254000000	177000000	138000000	166000000	245000000	137000000	187000000	165000000	148000000	322000000	364000000	248000000	0.86:1.04:0.82:1.13:1.42:0.67:1.53:1.07:0.83:1.00:1.47:0.82:1.13:0.99:0.89:1.94:2.19:1.49	163000000	179000000	203000000	186000000	167000000	311000000	0.88:0.96:1.09:1.00:0.90:1.67	80173	Retrotransposon-derived protein PEG10 OS=Homo sapiens GN=PEG10 PE=1 SV=2
2562	1574	P18077|RL35A_HUMAN	67.97	15	2	2		566000000	506000000	126000000	650000000	874000000	567000000	384000000	479000000	292000000	683000000	919000000	322000000	481000000	579000000	261000000	1060000000	899000000	517000000	0.83:0.74:0.19:0.95:1.28:0.83:0.56:0.70:0.43:1.00:1.35:0.47:0.70:0.85:0.38:1.56:1.32:0.76	400000000	770000000	386000000	641000000	440000000	826000000	0.62:1.20:0.60:1.00:0.69:1.29	12538	60S ribosomal protein L35a OS=Homo sapiens GN=RPL35A PE=1 SV=2
352	510	Q7Z4S6|KI21A_HUMAN	67.91	13	14	12	Carbamidomethylation; Deamidation (NQ); Phosphorylation (STY); Oxidation (HW); Citrullination; Acetylation (N-term)	431000000	476000000	264000000	720000000	626000000	570000000	388000000	420000000	441000000	679000000	797000000	512000000	498000000	482000000	378000000	883000000	829000000	709000000	0.64:0.70:0.39:1.06:0.92:0.84:0.57:0.62:0.65:1.00:1.17:0.75:0.73:0.71:0.56:1.30:1.22:1.04	390000000	650000000	416000000	663000000	486000000	807000000	0.59:0.98:0.63:1.00:0.73:1.22	187178	Kinesin-like protein KIF21A OS=Homo sapiens GN=KIF21A PE=1 SV=2
587	494	Q16576|RBBP7_HUMAN	67.82	29	10	4	Carbamidomethylation; Deamidation (NQ)	813000000	862000000	585000000	1390000000	1420000000	1370000000	718000000	1080000000	399000000	1750000000	1890000000	1170000000	1560000000	1260000000	1100000000	2020000000	2150000000	496000000	0.47:0.49:0.33:0.80:0.81:0.78:0.41:0.62:0.23:1.00:1.08:0.67:0.89:0.72:0.63:1.16:1.23:0.28	753000000	1410000000	858000000	1610000000	1310000000	1960000000	0.47:0.88:0.53:1.00:0.81:1.22	47820	Histone-binding protein RBBP7 OS=Homo sapiens GN=RBBP7 PE=1 SV=1
2157	2221	Q99622|C10_HUMAN	67.74	31	3	3	Acetylation (N-term); Carbamidomethylation	113000000	90200000	79200000	165000000	159000000	115000000	81100000	136000000	101000000	231000000	186000000	142000000	140000000	171000000	81500000	223000000	189000000	171000000	0.49:0.39:0.34:0.71:0.69:0.50:0.35:0.59:0.44:1.00:0.80:0.61:0.61:0.74:0.35:0.97:0.81:0.74	94100000	146000000	106000000	186000000	131000000	194000000	0.51:0.79:0.57:1.00:0.70:1.04	13178	Protein C10 OS=Homo sapiens GN=C12orf57 PE=1 SV=1
4180	20483	Q14353|GAMT_HUMAN	67.69	27	3	3	Carbamidomethylation; Acetylation (N-term)	304000000	322000000	246000000	359000000	448000000	339000000	161000000	200000000	194000000	335000000	345000000	288000000	186000000	159000000	140000000	426000000	436000000	339000000	0.91:0.96:0.74:1.07:1.34:1.01:0.48:0.60:0.58:1.00:1.03:0.86:0.56:0.48:0.42:1.27:1.30:1.01	291000000	382000000	195000000	323000000	162000000	400000000	0.90:1.18:0.60:1.00:0.50:1.24	26318	Guanidinoacetate N-methyltransferase OS=Homo sapiens GN=GAMT PE=1 SV=1
2343	1736	O60341|KDM1A_HUMAN	67.64	5	3	3	Carbamidomethylation; Deamidation (NQ); Pyro-glu from Q; Phosphorylation (STY)	59600000	49000000	57000000	81100000	67100000	61700000	69300000	60100000	79600000	124000000	76300000	73200000	59100000	53700000	34600000	122000000	136000000	83500000	0.48:0.40:0.46:0.66:0.54:0.50:0.56:0.49:0.64:1.00:0.62:0.59:0.48:0.43:0.28:0.99:1.10:0.67	55200000	70000000	69600000	91100000	50900000	114000000	0.61:0.77:0.76:1.00:0.56:1.25	92903	Lysine-specific histone demethylase 1A OS=Homo sapiens GN=KDM1A PE=1 SV=2
2911	3023	Q9Y6N5|SQRD_HUMAN	67.47	6	2	2	Deamidation (NQ); Phosphorylation (STY)	139000000	151000000	124000000	99600000	242000000	86600000	171000000	73100000	135000000	146000000	180000000	82900000	117000000	195000000	101000000	337000000	290000000	229000000	0.95:1.04:0.85:0.68:1.66:0.59:1.17:0.50:0.92:1.00:1.23:0.57:0.81:1.34:0.69:2.31:1.99:1.57	138000000	227000000	163000000	136000000	157000000	285000000	1.01:1.67:1.20:1.00:1.15:2.09	49961	Sulfide:quinone oxidoreductase mitochondrial OS=Homo sapiens GN=SQRDL PE=1 SV=1
2019	2004	Q6ZN66|GBP6_HUMAN	67.36	4	2	2	Phosphorylation (STY); Deamidation (NQ)	45500000	0	31700	0	0	1580000	16200000	13900000	118000000	12500000	0	22800000	0	90600000	124000000	63100000	61000000	26300000	3.64:0:0.02:0:0:0.13:1.30:1.11:9.43:1.00:0:1.82:0:7.25:9.96:5.05:4.88:2.11	22800000	1580000	116000000	17600000	108000000	50100000	1.29:0.09:6.59:1.00:6.10:2.84	72427	Guanylate-binding protein 6 OS=Homo sapiens GN=GBP6 PE=2 SV=1
1100	1509	Q9Y5M8|SRPRB_HUMAN	67.3	38	7	7	Acetylation (N-term); Deamidation (NQ); Phosphorylation (STY); Carbamidomethylation	1450000000	1470000000	1090000000	1260000000	1770000000	1100000000	1010000000	1810000000	1500000000	1240000000	1390000000	958000000	772000000	751000000	568000000	1510000000	1110000000	1100000000	1.17:1.19:0.88:1.01:1.43:0.89:0.81:1.46:1.21:1.00:1.13:0.77:0.62:0.61:0.46:1.22:0.90:0.88	1340000000	1380000000	1440000000	1200000000	697000000	1240000000	1.12:1.15:1.20:1.00:0.58:1.04	29702	Signal recognition particle receptor subunit beta OS=Homo sapiens GN=SRPRB PE=1 SV=3
100	376	Q13428|TCOF_HUMAN	67.23	19	17	17	Acetylation (N-term); Deamidation (NQ); Phosphorylation (STY); Oxidation (HW)	842000000	769000000	599000000	1420000000	1220000000	778000000	932000000	1140000000	613000000	1460000000	1750000000	1030000000	1460000000	1460000000	1110000000	1650000000	1740000000	1150000000	0.58:0.53:0.41:0.98:0.84:0.53:0.64:0.78:0.42:1.00:1.20:0.71:1.00:1.00:0.76:1.13:1.19:0.79	737000000	1140000000	896000000	1410000000	1340000000	1520000000	0.52:0.81:0.63:1.00:0.95:1.07	152105	Treacle protein OS=Homo sapiens GN=TCOF1 PE=1 SV=3
192	132	P00505|AATM_HUMAN	66.99	47	18	18	Carbamidomethylation; Deamidation (NQ); Pyro-glu from Q; Acetylation (N-term)	3620000000	2740000000	3320000000	4510000000	4180000000	4300000000	6350000000	4580000000	3840000000	5720000000	4420000000	4920000000	5550000000	5650000000	4020000000	7350000000	6780000000	5790000000	0.63:0.48:0.58:0.79:0.73:0.75:1.11:0.80:0.67:1.00:0.77:0.86:0.97:0.99:0.70:1.28:1.18:1.01	3230000000	4330000000	5070000000	5020000000	5070000000	6730000000	0.64:0.86:1.01:1.00:1.01:1.34	47518	Aspartate aminotransferase mitochondrial OS=Homo sapiens GN=GOT2 PE=1 SV=3
2100	4336	Q13206|DDX10_HUMAN	66.9	4	2	2		128000000	87700000	179000000	168000000	207000000	170000000	67900000	145000000	52100000	184000000	190000000	110000000	167000000	182000000	171000000	289000000	197000000	242000000	0.70:0.48:0.97:0.91:1.13:0.92:0.37:0.79:0.28:1.00:1.03:0.60:0.91:0.99:0.93:1.57:1.07:1.32	171000000	182000000	102000000	161000000	173000000	243000000	1.06:1.13:0.63:1.00:1.08:1.51	100888	Probable ATP-dependent RNA helicase DDX10 OS=Homo sapiens GN=DDX10 PE=1 SV=2
1019	2033	O43660|PLRG1_HUMAN	66.78	16	5	4	Carbamidomethylation	353000000	250000000	257000000	376000000	231000000	234000000	217000000	306000000	130000000	367000000	398000000	239000000	385000000	328000000	255000000	590000000	830000000	346000000	0.96:0.68:0.70:1.02:0.63:0.64:0.59:0.83:0.35:1.00:1.08:0.65:1.05:0.89:0.69:1.60:2.26:0.94	287000000	280000000	218000000	335000000	323000000	588000000	0.86:0.84:0.65:1.00:0.96:1.76	57194	Pleiotropic regulator 1 OS=Homo sapiens GN=PLRG1 PE=1 SV=1
1231	1877	Q9UNH7|SNX6_HUMAN	66.64	12	3	3	Carbamidomethylation	217000000	261000000	250000000	268000000	256000000	202000000	654000000	419000000	339000000	324000000	362000000	355000000	329000000	309000000	250000000	512000000	554000000	426000000	0.67:0.80:0.77:0.83:0.79:0.62:2.02:1.29:1.05:1.00:1.12:1.10:1.01:0.95:0.77:1.58:1.71:1.31	242000000	242000000	471000000	355000000	296000000	497000000	0.68:0.68:1.33:1.00:0.83:1.40	46649	Sorting nexin-6 OS=Homo sapiens GN=SNX6 PE=1 SV=1
392	447	P31040|SDHA_HUMAN	66.57	28	13	13	Carbamidomethylation; Phosphorylation (STY); Citrullination; Acetylation (N-term); Deamidation (NQ)	1650000000	1690000000	1560000000	1420000000	1900000000	1340000000	698000000	829000000	748000000	1230000000	1580000000	474000000	1060000000	1590000000	1210000000	2170000000	1780000000	1770000000	1.34:1.37:1.26:1.16:1.54:1.09:0.57:0.67:0.61:1.00:1.28:0.38:0.86:1.29:0.98:1.76:1.45:1.44	1630000000	1550000000	758000000	1090000000	1280000000	1910000000	1.49:1.42:0.69:1.00:1.18:1.75	72692	Succinate dehydrogenase [ubiquinone] flavoprotein subunit mitochondrial OS=Homo sapiens GN=SDHA PE=1 SV=2
1062	515	P18621|RL17_HUMAN	66.55	43	9	9	Acetylation (N-term); Deamidation (NQ); Carbamidomethylation; Phosphorylation (STY); Pyro-glu from Q	760000000	1250000000	403000000	1920000000	1530000000	1230000000	1410000000	1570000000	964000000	1930000000	1360000000	1460000000	1490000000	1220000000	958000000	1500000000	2370000000	1070000000	0.39:0.65:0.21:1.00:0.79:0.64:0.73:0.81:0.50:1.00:0.70:0.76:0.77:0.63:0.50:0.78:1.23:0.56	837000000	1560000000	1310000000	1610000000	1220000000	1680000000	0.52:0.97:0.82:1.00:0.76:1.04	21397	60S ribosomal protein L17 OS=Homo sapiens GN=RPL17 PE=1 SV=3
1824	1704	Q12972|PP1R8_HUMAN	66.51	20	3	3	Carbamidomethylation; Acetylation (N-term); Deamidation (NQ)	238000000	190000000	198000000	239000000	287000000	198000000	257000000	267000000	284000000	206000000	286000000	204000000	199000000	270000000	173000000	463000000	353000000	468000000	1.15:0.92:0.96:1.16:1.39:0.96:1.24:1.30:1.38:1.00:1.39:0.99:0.96:1.31:0.84:2.25:1.71:2.27	209000000	269000000	290000000	232000000	214000000	444000000	0.90:1.16:1.25:1.00:0.92:1.92	38479	Nuclear inhibitor of protein phosphatase 1 OS=Homo sapiens GN=PPP1R8 PE=1 SV=2
1278	1435	Q15286|RAB35_HUMAN	66.47	12	2	1	Carbamidomethylation; Acetylation (N-term); Deamidation (NQ)	285000000	161000000	369000000	241000000	722000000	111000000	163000000	266000000	314000000	617000000	1370000000	353000000	337000000	709000000	199000000	848000000	353000000	471000000	0.46:0.26:0.60:0.39:1.17:0.18:0.26:0.43:0.51:1.00:2.22:0.57:0.55:1.15:0.32:1.38:0.57:0.76	272000000	404000000	248000000	779000000	415000000	557000000	0.35:0.52:0.32:1.00:0.53:0.72	23025	Ras-related protein Rab-35 OS=Homo sapiens GN=RAB35 PE=1 SV=1
2951	2295	Q8ND30|LIPB2_HUMAN	66.37	3	2	2	Carbamidomethylation; Phosphorylation (STY)	15800000	14400000	14000000	7930000	6460000	7420000	43100000	38400000	41200000	83700000	101000000	97700000	17000000	18200000	8790000	177000000	193000000	155000000	0.19:0.17:0.17:0.09:0.08:0.09:0.51:0.46:0.49:1.00:1.20:1.17:0.20:0.22:0.11:2.12:2.31:1.85	14700000	7270000	40900000	101000000	14700000	175000000	0.15:0.07:0.41:1.00:0.15:1.74	98544	Liprin-beta-2 OS=Homo sapiens GN=PPFIBP2 PE=1 SV=3
284	183	Q9P2J5|SYLC_HUMAN	66.32	20	17	17	Carbamidomethylation; Pyro-glu from Q; Deamidation (NQ)	3350000000	2900000000	2870000000	1410000000	996000000	1110000000	1890000000	1410000000	981000000	1440000000	1740000000	1170000000	1270000000	2100000000	1080000000	1930000000	2250000000	1530000000	2.33:2.02:1.99:0.98:0.69:0.77:1.31:0.98:0.68:1.00:1.21:0.81:0.88:1.46:0.75:1.34:1.56:1.06	3140000000	1330000000	1580000000	1450000000	1970000000	1900000000	2.16:0.92:1.09:1.00:1.36:1.31	134466	Leucine--tRNA ligase cytoplasmic OS=Homo sapiens GN=LARS PE=1 SV=2
295	296	Q13435|SF3B2_HUMAN	66.26	21	12	12	Pyro-glu from Q; Acetylation (N-term)	937000000	1320000000	595000000	1570000000	1520000000	853000000	1130000000	1710000000	864000000	1330000000	1340000000	1030000000	1850000000	2080000000	1410000000	2250000000	1910000000	1680000000	0.70:0.99:0.45:1.18:1.14:0.64:0.85:1.28:0.65:1.00:1.00:0.77:1.39:1.56:1.06:1.69:1.44:1.26	965000000	1400000000	1250000000	1230000000	1780000000	2220000000	0.78:1.13:1.01:1.00:1.45:1.80	100228	Splicing factor 3B subunit 2 OS=Homo sapiens GN=SF3B2 PE=1 SV=2
1323	1784	Q86YP4|P66A_HUMAN	66.16	17	5	5		196000000	254000000	188000000	297000000	274000000	281000000	273000000	315000000	261000000	333000000	415000000	268000000	252000000	234000000	205000000	432000000	491000000	382000000	0.59:0.76:0.57:0.89:0.82:0.84:0.82:0.95:0.78:1.00:1.25:0.80:0.76:0.70:0.62:1.30:1.48:1.15	213000000	284000000	283000000	338000000	230000000	435000000	0.63:0.84:0.84:1.00:0.68:1.29	68063	Transcriptional repressor p66-alpha OS=Homo sapiens GN=GATAD2A PE=1 SV=1
300	163	Q02790|FKBP4_HUMAN	66.12	36	15	15	Carbamidomethylation; Acetylation (N-term); Deamidation (NQ); Oxidation (M)	2840000000	2380000000	2020000000	4230000000	4650000000	2130000000	3310000000	4170000000	2950000000	4660000000	5560000000	3650000000	3640000000	5710000000	2880000000	5840000000	5300000000	3650000000	0.61:0.51:0.43:0.91:1.00:0.46:0.71:0.89:0.63:1.00:1.19:0.78:0.78:1.22:0.62:1.25:1.14:0.78	2440000000	3670000000	3480000000	4620000000	4160000000	4930000000	0.53:0.79:0.75:1.00:0.90:1.07	51805	Peptidyl-prolyl cis-trans isomerase FKBP4 OS=Homo sapiens GN=FKBP4 PE=1 SV=3
499	514	Q8TAQ2|SMRC2_HUMAN	66.02	12	11	7	Carbamidomethylation; Phosphorylation (STY); Citrullination; Deamidation (NQ)	304000000	575000000	481000000	557000000	766000000	539000000	877000000	857000000	513000000	577000000	608000000	592000000	719000000	694000000	502000000	990000000	997000000	791000000	0.53:1.00:0.83:0.97:1.33:0.94:1.52:1.49:0.89:1.00:1.05:1.03:1.25:1.20:0.87:1.72:1.73:1.37	531000000	621000000	749000000	592000000	638000000	926000000	0.90:1.05:1.27:1.00:1.08:1.56	132879	SWI/SNF complex subunit SMARCC2 OS=Homo sapiens GN=SMARCC2 PE=1 SV=1
29	59	Q13885|TBB2A_HUMAN	65.9	58	41	1	Carbamidomethylation; Acetylation (N-term); Oxidation (M); Deamidation (NQ); Pyro-glu from E; Pyro-glu from Q	288000000	296000000	233000000	397000000	462000000	311000000	171000000	209000000	193000000	470000000	531000000	332000000	227000000	199000000	173000000	600000000	497000000	391000000	0.61:0.63:0.50:0.84:0.98:0.66:0.36:0.44:0.41:1.00:1.13:0.71:0.48:0.42:0.37:1.28:1.06:0.83	272000000	390000000	191000000	444000000	200000000	496000000	0.61:0.88:0.43:1.00:0.45:1.12	49907	Tubulin beta-2A chain OS=Homo sapiens GN=TUBB2A PE=1 SV=1
1321	1748	P46109|CRKL_HUMAN	65.59	24	6	6	Carbamidomethylation; Phosphorylation (STY); Deamidation (NQ)	453000000	362000000	503000000	567000000	421000000	502000000	861000000	626000000	500000000	1010000000	802000000	885000000	474000000	516000000	366000000	807000000	1050000000	831000000	0.45:0.36:0.50:0.56:0.41:0.49:0.85:0.62:0.49:1.00:0.79:0.87:0.47:0.51:0.36:0.80:1.04:0.82	439000000	515000000	663000000	900000000	452000000	896000000	0.49:0.57:0.74:1.00:0.50:1.00	33777	Crk-like protein OS=Homo sapiens GN=CRKL PE=1 SV=1
2537	2037	P51970|NDUA8_HUMAN	65.4	34	5	5	Acetylation (N-term); Citrullination; Carbamidomethylation	1090000000	908000000	656000000	1430000000	934000000	959000000	483000000	785000000	366000000	1390000000	1190000000	731000000	1010000000	838000000	613000000	1400000000	1600000000	705000000	0.78:0.65:0.47:1.03:0.67:0.69:0.35:0.56:0.26:1.00:0.85:0.53:0.73:0.60:0.44:1.01:1.15:0.51	884000000	1110000000	554000000	1110000000	820000000	1240000000	0.79:1.00:0.50:1.00:0.74:1.11	20105	NADH dehydrogenase [ubiquinone] 1 alpha subcomplex subunit 8 OS=Homo sapiens GN=NDUFA8 PE=1 SV=3
2132	3013	Q13123|RED_HUMAN	65.24	8	3	3		106000000	84600000	142000000	143000000	238000000	108000000	175000000	191000000	161000000	157000000	195000000	107000000	255000000	208000000	163000000	380000000	368000000	258000000	0.68:0.54:0.91:0.91:1.52:0.69:1.12:1.22:1.03:1.00:1.25:0.68:1.63:1.33:1.04:2.42:2.35:1.65	175000000	163000000	180000000	153000000	216000000	335000000	1.14:1.07:1.17:1.00:1.41:2.19	65602	Protein Red OS=Homo sapiens GN=IK PE=1 SV=3
1384	1514	P20591|MX1_HUMAN	65.01	14	6	4	Carbamidomethylation; Acetylation (N-term)	516000000	690000000	453000000	675000000	947000000	537000000	619000000	519000000	474000000	413000000	538000000	264000000	326000000	247000000	244000000	428000000	442000000	215000000	1.25:1.67:1.10:1.63:2.29:1.30:1.50:1.26:1.15:1.00:1.30:0.64:0.79:0.60:0.59:1.04:1.07:0.52	553000000	720000000	590000000	405000000	299000000	406000000	1.36:1.78:1.46:1.00:0.74:1.00	75520	Interferon-induced GTP-binding protein Mx1 OS=Homo sapiens GN=MX1 PE=1 SV=4
6	4	P63261|ACTG_HUMAN	64.95	69	58	2	Carbamidomethylation; Acetylation (N-term); Oxidation (M); Deamidation (NQ); Pyro-glu from Q; 4 more	5610000000	6080000000	5320000000	4350000000	5860000000	3070000000	3890000000	7650000000	5720000000	3850000000	5430000000	4960000000	3140000000	2840000000	2510000000	5190000000	5060000000	3910000000	1.46:1.58:1.38:1.13:1.52:0.80:1.01:1.99:1.49:1.00:1.41:1.29:0.82:0.74:0.65:1.35:1.31:1.02	5670000000	4430000000	5910000000	4750000000	2850000000	4720000000	1.19:0.93:1.24:1.00:0.60:1.00	41793	Actin cytoplasmic 2 OS=Homo sapiens GN=ACTG1 PE=1 SV=1
1875	10362	Q9NP92|RT30_HUMAN	64.84	12	3	3	Carbamidomethylation	118000000	145000000	94900000	124000000	153000000	164000000	178000000	209000000	117000000	118000000	168000000	86600000	120000000	138000000	114000000	368000000	456000000	372000000	1.00:1.23:0.80:1.05:1.30:1.39:1.51:1.77:0.99:1.00:1.42:0.73:1.01:1.17:0.97:3.12:3.86:3.15	119000000	147000000	168000000	124000000	124000000	399000000	0.96:1.18:1.35:1.00:1.00:3.21	50365	28S ribosomal protein S30 mitochondrial OS=Homo sapiens GN=MRPS30 PE=1 SV=2
962	1528	Q7Z739|YTHD3_HUMAN	64.74	7	5	4	Acetylation (N-term); Deamidation (NQ); Pyro-glu from Q	106000000	113000000	72300000	124000000	138000000	78100000	108000000	115000000	72800000	161000000	65500000	84900000	119000000	122000000	83700000	242000000	221000000	129000000	0.66:0.70:0.45:0.77:0.86:0.49:0.67:0.71:0.45:1.00:0.41:0.53:0.74:0.76:0.52:1.50:1.37:0.80	97200000	113000000	98500000	126000000	108000000	197000000	0.77:0.90:0.78:1.00:0.86:1.57	63861	YTH domain-containing family protein 3 OS=Homo sapiens GN=YTHDF3 PE=1 SV=1
1688	2431	P49748|ACADV_HUMAN	64.65	13	5	5		247000000	258000000	221000000	253000000	365000000	207000000	181000000	449000000	241000000	331000000	327000000	270000000	347000000	576000000	300000000	527000000	567000000	378000000	0.75:0.78:0.67:0.77:1.11:0.63:0.55:1.36:0.73:1.00:0.99:0.82:1.05:1.74:0.91:1.60:1.71:1.14	242000000	275000000	290000000	309000000	408000000	491000000	0.78:0.89:0.94:1.00:1.32:1.59	70390	Very long-chain specific acyl-CoA dehydrogenase mitochondrial OS=Homo sapiens GN=ACADVL PE=1 SV=1
1592	610	P08754|GNAI3_HUMAN	64.57	14	4	2	Carbamidomethylation	162000000	138000000	129000000	205000000	194000000	198000000	299000000	161000000	182000000	230000000	199000000	195000000	176000000	193000000	150000000	365000000	292000000	214000000	0.71:0.60:0.56:0.89:0.84:0.86:1.30:0.70:0.79:1.00:0.86:0.85:0.77:0.84:0.65:1.59:1.27:0.93	149000000	199000000	214000000	208000000	173000000	305000000	0.72:0.96:1.03:1.00:0.83:1.47	40532	Guanine nucleotide-binding protein G(k) subunit alpha OS=Homo sapiens GN=GNAI3 PE=1 SV=3
1468	1686	Q9BTE3|MCMBP_HUMAN	64.56	8	4	4	Carbamidomethylation	337000000	265000000	297000000	552000000	474000000	329000000	453000000	355000000	278000000	562000000	506000000	367000000	461000000	580000000	393000000	618000000	771000000	431000000	0.60:0.47:0.53:0.98:0.84:0.59:0.81:0.63:0.49:1.00:0.90:0.65:0.82:1.03:0.70:1.10:1.37:0.77	305000000	452000000	395000000	478000000	525000000	822000000	0.64:0.94:0.83:1.00:1.10:1.72	72980	Mini-chromosome maintenance complex-binding protein OS=Homo sapiens GN=MCMBP PE=1 SV=2
2510	16093	Q92925|SMRD2_HUMAN	64.47	10	4	4		154000000	66500000	111000000	90400000	303000000	86400000	153000000	81200000	89600000	173000000	293000000	93800000	92200000	75400000	51000000	326000000	196000000	151000000	0.89:0.38:0.64:0.52:1.75:0.50:0.89:0.47:0.52:1.00:1.70:0.54:0.53:0.44:0.29:1.88:1.13:0.87	121000000	188000000	146000000	261000000	72800000	255000000	0.46:0.72:0.56:1.00:0.28:0.98	58921	SWI/SNF-related matrix-associated actin-dependent regulator of chromatin subfamily D member 2 OS=Homo sapiens GN=SMARCD2 PE=1 SV=3
1479	2321	Q96ST2|IWS1_HUMAN	64.45	6	3	3	Acetylation (N-term); Phosphorylation (STY)	103000000	121000000	74000000	183000000	83000000	83200000	56800000	56200000	33200000	69500000	82100000	53400000	72400000	84200000	66100000	84200000	98200000	60800000	1.48:1.74:1.06:2.63:1.19:1.20:0.82:0.81:0.48:1.00:1.18:0.77:1.04:1.21:0.95:1.21:1.41:0.87	99200000	117000000	50200000	68400000	74300000	85600000	1.45:1.71:0.73:1.00:1.09:1.25	91955	Protein IWS1 homolog OS=Homo sapiens GN=IWS1 PE=1 SV=2
3405	2060	Q13243|SRSF5_HUMAN	64.45	12	3	2	Pyro-glu from Q	253000000	319000000	78400000	247000000	387000000	113000000	312000000	378000000	271000000	460000000	317000000	215000000	414000000	420000000	224000000	590000000	460000000	266000000	0.55:0.69:0.17:0.54:0.84:0.25:0.68:0.82:0.59:1.00:0.69:0.47:0.90:0.91:0.49:1.28:1.00:0.58	283000000	297000000	320000000	378000000	399000000	439000000	0.75:0.78:0.85:1.00:1.05:1.16	31264	Serine/arginine-rich splicing factor 5 OS=Homo sapiens GN=SRSF5 PE=1 SV=1
701	1587	P69849|NOMO3_HUMAN	64.34	12	9	9	Carbamidomethylation; Acetylation (N-term); Deamidation (NQ)	487000000	470000000	398000000	668000000	575000000	527000000	789000000	766000000	512000000	557000000	634000000	537000000	723000000	769000000	574000000	994000000	855000000	892000000	0.87:0.84:0.71:1.20:1.03:0.95:1.42:1.38:0.92:1.00:1.14:0.96:1.30:1.38:1.03:1.78:1.54:1.60	452000000	590000000	689000000	576000000	688000000	914000000	0.78:1.02:1.20:1.00:1.20:1.59	134133	Nodal modulator 3 OS=Homo sapiens GN=NOMO3 PE=3 SV=2
1120	1370	O43583|DENR_HUMAN	64.19	28	3	3	Pyro-glu from Q; Carbamidomethylation	184000000	201000000	447000000	204000000	152000000	474000000	326000000	314000000	614000000	411000000	320000000	739000000	231000000	239000000	476000000	442000000	412000000	830000000	0.45:0.49:1.09:0.50:0.37:1.15:0.79:0.76:1.49:1.00:0.78:1.80:0.56:0.58:1.16:1.08:1.00:2.02	459000000	472000000	645000000	735000000	510000000	893000000	0.62:0.64:0.88:1.00:0.69:1.22	22092	Density-regulated protein OS=Homo sapiens GN=DENR PE=1 SV=2
1968	1391	P42574|CASP3_HUMAN	63.99	11	2	2	Carbamidomethylation	438000000	394000000	329000000	367000000	454000000	342000000	202000000	517000000	339000000	403000000	730000000	264000000	439000000	882000000	554000000	692000000	828000000	824000000	1.09:0.98:0.82:0.91:1.13:0.85:0.50:1.28:0.84:1.00:1.81:0.66:1.09:2.19:1.37:1.72:2.06:2.04	387000000	387000000	353000000	466000000	625000000	781000000	0.83:0.83:0.76:1.00:1.34:1.68	31608	Caspase-3 OS=Homo sapiens GN=CASP3 PE=1 SV=2
3123	1944	Q9Y2S0|RPAC2_HUMAN	63.91	30	3	3	Carbamidomethylation; Acetylation (N-term)	337000000	348000000	264000000	310000000	402000000	273000000	196000000	256000000	178000000	431000000	498000000	278000000	393000000	476000000	309000000	718000000	686000000	510000000	0.78:0.81:0.61:0.72:0.93:0.63:0.46:0.59:0.41:1.00:1.16:0.64:0.91:1.10:0.72:1.67:1.59:1.18	323000000	329000000	210000000	402000000	396000000	669000000	0.80:0.82:0.52:1.00:0.98:1.66	15237	DNA-directed RNA polymerases I and III subunit RPAC2 OS=Homo sapiens GN=POLR1D PE=1 SV=1
1621	2519	P41236|IPP2_HUMAN	63.79	18	3	3	Phosphorylation (STY)	40400000	85500000	39200000	120000000	60500000	123000000	72000000	135000000	99500000	127000000	154000000	134000000	212000000	177000000	184000000	118000000	150000000	102000000	0.32:0.67:0.31:0.94:0.48:0.97:0.57:1.07:0.79:1.00:1.22:1.06:1.67:1.40:1.45:0.93:1.19:0.80	61200000	101000000	102000000	138000000	191000000	123000000	0.44:0.73:0.74:1.00:1.38:0.89	23015	Protein phosphatase inhibitor 2 OS=Homo sapiens GN=PPP1R2 PE=1 SV=2
771	1876	Q8IWZ3|ANKH1_HUMAN	63.73	3	4	3	Carbamidomethylation; Phosphorylation (STY)	238000000	191000000	197000000	283000000	279000000	251000000	102000000	133000000	168000000	244000000	251000000	219000000	211000000	162000000	160000000	175000000	172000000	90800000	0.98:0.78:0.81:1.16:1.14:1.03:0.42:0.55:0.69:1.00:1.03:0.90:0.87:0.67:0.66:0.72:0.71:0.37	218000000	271000000	134000000	238000000	193000000	163000000	0.91:1.14:0.57:1.00:0.81:0.68	269455	Ankyrin repeat and KH domain-containing protein 1 OS=Homo sapiens GN=ANKHD1 PE=1 SV=1
1272	1251	Q9H444|CHM4B_HUMAN	63.66	30	4	4	Acetylation (N-term); Deamidation (NQ); Pyro-glu from Q	214000000	238000000	227000000	344000000	362000000	505000000	242000000	185000000	263000000	491000000	385000000	378000000	455000000	282000000	434000000	485000000	531000000	351000000	0.44:0.48:0.46:0.70:0.74:1.03:0.49:0.38:0.54:1.00:0.79:0.77:0.93:0.57:0.89:0.99:1.08:0.72	226000000	415000000	230000000	418000000	390000000	484000000	0.54:0.99:0.55:1.00:0.93:1.16	24950	Charged multivesicular body protein 4b OS=Homo sapiens GN=CHMP4B PE=1 SV=1
269	410	P14314|GLU2B_HUMAN	63.54	47	17	17	Carbamidomethylation; Acetylation (N-term); Deamidation (NQ)	1750000000	2930000000	2070000000	3690000000	3040000000	2210000000	3950000000	4690000000	2900000000	2990000000	3260000000	2430000000	3410000000	3810000000	2750000000	5720000000	4250000000	3630000000	0.59:0.98:0.69:1.23:1.01:0.74:1.32:1.57:0.97:1.00:1.09:0.81:1.14:1.27:0.92:1.91:1.42:1.21	2540000000	2980000000	3850000000	2890000000	3320000000	4570000000	0.88:1.03:1.33:1.00:1.15:1.58	59426	Glucosidase 2 subunit beta OS=Homo sapiens GN=PRKCSH PE=1 SV=2
1800	1024	Q8IZP0|ABI1_HUMAN	63.52	14	4	4	Carbamidomethylation	691000000	533000000	552000000	1030000000	935000000	774000000	373000000	624000000	364000000	811000000	929000000	506000000	667000000	764000000	627000000	1050000000	906000000	452000000	0.85:0.66:0.68:1.27:1.15:0.95:0.46:0.77:0.45:1.00:1.15:0.62:0.82:0.94:0.77:1.30:1.12:0.56	592000000	914000000	454000000	749000000	686000000	803000000	0.79:1.22:0.61:1.00:0.92:1.07	55081	Abl interactor 1 OS=Homo sapiens GN=ABI1 PE=1 SV=4
1771	10557	O60232|SSA27_HUMAN	63.39	34	3	3	Carbamidomethylation	261000000	172000000	250000000	304000000	241000000	132000000	472000000	503000000	386000000	472000000	500000000	385000000	435000000	510000000	392000000	389000000	395000000	471000000	0.55:0.37:0.53:0.65:0.51:0.28:1.00:1.07:0.82:1.00:1.06:0.82:0.92:1.08:0.83:0.82:0.84:1.00	227000000	292000000	454000000	452000000	446000000	418000000	0.50:0.64:1.00:1.00:0.98:0.92	21474	Sjoegren syndrome/scleroderma autoantigen 1 OS=Homo sapiens GN=SSSCA1 PE=1 SV=1
1893	1145	P27701|CD82_HUMAN	63.35	18	3	3	Carbamidomethylation; Pyro-glu from Q; Deamidation (NQ)	756000000	571000000	631000000	1300000000	1010000000	1210000000	1150000000	981000000	1210000000	1610000000	1450000000	1280000000	1230000000	1590000000	1110000000	1350000000	1260000000	883000000	0.47:0.35:0.39:0.81:0.63:0.75:0.71:0.61:0.75:1.00:0.90:0.79:0.76:0.99:0.69:0.84:0.78:0.55	741000000	1180000000	1110000000	1450000000	1310000000	1170000000	0.51:0.82:0.77:1.00:0.91:0.81	29626	CD82 antigen OS=Homo sapiens GN=CD82 PE=1 SV=1
947	1180	P48637|GSHB_HUMAN	63.18	19	6	6	Carbamidomethylation; Acetylation (N-term)	1010000000	948000000	627000000	1290000000	1790000000	853000000	608000000	815000000	534000000	777000000	1130000000	478000000	714000000	1070000000	628000000	1230000000	410000000	380000000	1.30:1.22:0.81:1.66:2.31:1.10:0.78:1.05:0.69:1.00:1.46:0.62:0.92:1.37:0.81:1.59:0.53:0.49	900000000	1310000000	653000000	875000000	803000000	1180000000	1.03:1.50:0.75:1.00:0.92:1.35	52385	Glutathione synthetase OS=Homo sapiens GN=GSS PE=1 SV=1
797	1009	Q9UH65|SWP70_HUMAN	63.17	11	5	5	Pyro-glu from Q	272000000	329000000	179000000	409000000	500000000	310000000	327000000	472000000	261000000	530000000	453000000	290000000	504000000	482000000	384000000	650000000	569000000	348000000	0.51:0.62:0.34:0.77:0.94:0.59:0.62:0.89:0.49:1.00:0.85:0.55:0.95:0.91:0.73:1.23:1.07:0.66	260000000	407000000	353000000	424000000	457000000	522000000	0.61:0.96:0.83:1.00:1.08:1.23	68998	Switch-associated protein 70 OS=Homo sapiens GN=SWAP70 PE=1 SV=1
1158	797	Q9UKX7|NUP50_HUMAN	62.91	13	4	4	Carbamidomethylation; Deamidation (NQ); Acetylation (N-term)	316000000	342000000	213000000	472000000	352000000	308000000	136000000	214000000	215000000	388000000	389000000	290000000	198000000	328000000	165000000	439000000	538000000	294000000	0.81:0.88:0.55:1.22:0.91:0.79:0.35:0.55:0.55:1.00:1.00:0.75:0.51:0.84:0.42:1.13:1.38:0.76	291000000	405000000	255000000	367000000	301000000	438000000	0.79:1.11:0.70:1.00:0.82:1.20	50144	Nuclear pore complex protein Nup50 OS=Homo sapiens GN=NUP50 PE=1 SV=2
1572	10307	P49916|DNLI3_HUMAN	62.89	11	7	7	Deamidation (NQ); Oxidation (HW)	579000000	531000000	504000000	192000000	201000000	387000000	210000000	411000000	164000000	188000000	553000000	143000000	222000000	259000000	324000000	734000000	629000000	105000000	3.08:2.83:2.68:1.02:1.07:2.06:1.12:2.19:0.87:1.00:2.94:0.76:1.18:1.38:1.72:3.91:3.35:0.56	538000000	295000000	292000000	356000000	315000000	684000000	1.51:0.83:0.82:1.00:0.89:1.92	112907	DNA ligase 3 OS=Homo sapiens GN=LIG3 PE=1 SV=2
368	751	Q14008|CKAP5_HUMAN	62.75	10	16	16	Carbamidomethylation; Phosphorylation (STY)	597000000	696000000	573000000	1050000000	1200000000	878000000	722000000	509000000	326000000	985000000	1080000000	718000000	612000000	770000000	644000000	1100000000	1600000000	829000000	0.61:0.71:0.58:1.07:1.21:0.89:0.73:0.52:0.33:1.00:1.09:0.73:0.62:0.78:0.65:1.12:1.62:0.84	678000000	1080000000	707000000	938000000	686000000	1180000000	0.72:1.15:0.75:1.00:0.73:1.25	225493	Cytoskeleton-associated protein 5 OS=Homo sapiens GN=CKAP5 PE=1 SV=3
704	987	Q15424|SAFB1_HUMAN	62.63	18	9	4	Acetylation (N-term); Carbamidomethylation; Deamidation (NQ); Phosphorylation (STY)	375000000	557000000	262000000	773000000	732000000	686000000	270000000	391000000	624000000	760000000	440000000	543000000	551000000	418000000	288000000	795000000	1040000000	557000000	0.49:0.73:0.34:1.02:0.96:0.90:0.36:0.51:0.82:1.00:0.58:0.71:0.72:0.55:0.38:1.05:1.37:0.73	557000000	752000000	489000000	665000000	465000000	867000000	0.84:1.13:0.74:1.00:0.70:1.30	102642	Scaffold attachment factor B1 OS=Homo sapiens GN=SAFB PE=1 SV=4
643	1454	P16403|H12_HUMAN	62.63	23	4	1	Acetylation (N-term); Phosphorylation (STY)	552000000	540000000	507000000	792000000	368000000	494000000	1320000000	902000000	1090000000	1450000000	897000000	1330000000	769000000	663000000	437000000	820000000	1130000000	923000000	0.38:0.37:0.35:0.55:0.25:0.34:0.91:0.62:0.75:1.00:0.62:0.92:0.53:0.46:0.30:0.56:0.78:0.64	543000000	552000000	1100000000	1230000000	633000000	959000000	0.44:0.45:0.90:1.00:0.52:0.78	21365	Histone H1.2 OS=Homo sapiens GN=HIST1H1C PE=1 SV=2
26	56	Q14204|DYHC1_HUMAN	62.62	15	50	50	Carbamidomethylation; Acetylation (N-term); Deamidation (NQ); Oxidation (HW); Phosphorylation (STY); Pyro-glu from Q	689000000	773000000	521000000	1050000000	857000000	628000000	1180000000	1190000000	712000000	1060000000	1240000000	18200000000	1060000000	1120000000	826000000	1590000000	981000000	1400000000	0.65:0.73:0.49:0.99:0.81:0.59:1.12:1.13:0.67:1.00:1.17:17.21:1.00:1.06:0.78:1.50:0.93:1.33	662000000	850000000	1030000000	9800000000	1000000000	1430000000	0.07:0.09:0.11:1.00:0.10:0.15	532412	Cytoplasmic dynein 1 heavy chain 1 OS=Homo sapiens GN=DYNC1H1 PE=1 SV=5
1847	2152	Q13148|TADBP_HUMAN	62.6	4	2	2		90800000	102000000	79800000	335000000	151000000	311000000	171000000	58800000	212000000	287000000	181000000	214000000	214000000	88300000	66900000	134000000	282000000	129000000	0.32:0.35:0.28:1.17:0.52:1.08:0.59:0.20:0.74:1.00:0.63:0.74:0.74:0.31:0.23:0.47:0.98:0.45	90800000	265000000	147000000	227000000	123000000	182000000	0.40:1.17:0.65:1.00:0.54:0.80	44740	TAR DNA-binding protein 43 OS=Homo sapiens GN=TARDBP PE=1 SV=1
2469	2801	Q9NZU5|LMCD1_HUMAN	62.45	12	2	2	Deamidation (NQ); Phosphorylation (STY); Pyro-glu from Q	150000000	170000000	129000000	300000000	175000000	141000000	163000000	195000000	109000000	172000000	232000000	142000000	157000000	173000000	136000000	344000000	311000000	241000000	0.87:0.99:0.75:1.74:1.02:0.82:0.95:1.13:0.63:1.00:1.35:0.83:0.91:1.01:0.79:2.00:1.81:1.40	149000000	205000000	156000000	182000000	155000000	299000000	0.82:1.13:0.85:1.00:0.85:1.64	40833	LIM and cysteine-rich domains protein 1 OS=Homo sapiens GN=LMCD1 PE=1 SV=1
176	311	Q05639|EF1A2_HUMAN	62.36	25	13	1	Carbamidomethylation; Oxidation (M); Pyro-glu from Q; Deamidation (NQ); Acetylation (N-term)	733000000	596000000	512000000	579000000	632000000	643000000	539000000	709000000	620000000	474000000	508000000	463000000	313000000	343000000	254000000	580000000	548000000	75500000	1.55:1.26:1.08:1.22:1.33:1.36:1.14:1.50:1.31:1.00:1.07:0.98:0.66:0.72:0.54:1.23:1.16:0.16	614000000	618000000	622000000	482000000	303000000	401000000	1.27:1.28:1.29:1.00:0.63:0.83	50470	Elongation factor 1-alpha 2 OS=Homo sapiens GN=EEF1A2 PE=1 SV=1
1692	1258	Q13895|BYST_HUMAN	62.33	9	2	2	Pyro-glu from Q	387000000	393000000	257000000	276000000	486000000	247000000	155000000	310000000	242000000	442000000	520000000	232000000	355000000	439000000	263000000	883000000	688000000	503000000	0.88:0.89:0.58:0.63:1.10:0.56:0.35:0.70:0.55:1.00:1.18:0.53:0.80:0.99:0.60:2.00:1.56:1.14	346000000	406000000	257000000	398000000	353000000	744000000	0.87:1.02:0.65:1.00:0.89:1.87	49601	Bystin OS=Homo sapiens GN=BYSL PE=1 SV=3
1169	1298	Q99598|TSNAX_HUMAN	62.3	22	5	5	Deamidation (NQ)	332000000	334000000	267000000	510000000	455000000	323000000	383000000	453000000	251000000	540000000	494000000	348000000	553000000	639000000	411000000	702000000	629000000	535000000	0.62:0.62:0.49:0.94:0.84:0.60:0.71:0.84:0.46:1.00:0.91:0.64:1.02:1.18:0.76:1.30:1.16:0.99	311000000	429000000	395000000	461000000	534000000	622000000	0.68:0.93:0.86:1.00:1.16:1.35	33112	Translin-associated protein X OS=Homo sapiens GN=TSNAX PE=1 SV=1
84	114	P27824|CALX_HUMAN	62.26	34	22	22	Acetylation (N-term); Deamidation (NQ); Citrullination; Carbamidomethylation; Phosphorylation (STY); Pyro-glu from Q	6740000000	6660000000	5850000000	10900000000	9770000000	9600000000	10900000000	11100000000	9850000000	12400000000	11300000000	10200000000	10400000000	15500000000	12100000000	14800000000	12000000000	11700000000	0.55:0.54:0.47:0.88:0.79:0.78:0.89:0.90:0.80:1.00:0.92:0.82:0.85:1.26:0.98:1.20:0.97:0.94	6420000000	10100000000	10800000000	11300000000	12700000000	12800000000	0.57:0.89:0.95:1.00:1.12:1.13	67568	Calnexin OS=Homo sapiens GN=CANX PE=1 SV=2
2329	12770	Q8N6H7|ARFG2_HUMAN	62.17	7	3	3		160000000	136000000	131000000	195000000	192000000	165000000	229000000	188000000	168000000	227000000	222000000	185000000	180000000	207000000	142000000	317000000	304000000	231000000	0.71:0.60:0.58:0.86:0.85:0.73:1.01:0.83:0.74:1.00:0.98:0.81:0.79:0.91:0.63:1.40:1.34:1.02	142000000	184000000	195000000	211000000	176000000	284000000	0.67:0.87:0.92:1.00:0.83:1.34	56720	ADP-ribosylation factor GTPase-activating protein 2 OS=Homo sapiens GN=ARFGAP2 PE=1 SV=1
2797	32050	Q9Y320|TMX2_HUMAN	62.15	12	3	3		120000000	174000000	132000000	254000000	238000000	284000000	198000000	141000000	157000000	279000000	145000000	210000000	273000000	162000000	150000000	253000000	387000000	210000000	0.43:0.62:0.47:0.91:0.85:1.02:0.71:0.51:0.56:1.00:0.52:0.75:0.98:0.58:0.54:0.91:1.39:0.75	142000000	259000000	196000000	211000000	195000000	283000000	0.67:1.22:0.93:1.00:0.92:1.34	34038	Thioredoxin-related transmembrane protein 2 OS=Homo sapiens GN=TMX2 PE=1 SV=1
1031	1586	P35269|T2FA_HUMAN	61.93	11	5	5	Acetylation (N-term)	488000000	312000000	359000000	619000000	841000000	508000000	384000000	415000000	436000000	727000000	864000000	259000000	310000000	413000000	318000000	1150000000	274000000	889000000	0.67:0.43:0.49:0.85:1.16:0.70:0.53:0.57:0.60:1.00:1.19:0.36:0.43:0.57:0.44:1.58:0.38:1.22	387000000	656000000	433000000	623000000	347000000	949000000	0.62:1.05:0.70:1.00:0.56:1.52	58241	General transcription factor IIF subunit 1 OS=Homo sapiens GN=GTF2F1 PE=1 SV=2
2159	1516	P62310|LSM3_HUMAN	61.84	40	3	3	Acetylation (N-term); Deamidation (NQ)	488000000	482000000	211000000	432000000	628000000	208000000	301000000	360000000	211000000	461000000	625000000	220000000	201000000	310000000	80600000	578000000	457000000	229000000	1.06:1.04:0.46:0.94:1.36:0.45:0.65:0.78:0.46:1.00:1.35:0.48:0.44:0.67:0.17:1.25:0.99:0.50	393000000	444000000	290000000	435000000	197000000	421000000	0.90:1.02:0.67:1.00:0.45:0.97	11845	U6 snRNA-associated Sm-like protein LSm3 OS=Homo sapiens GN=LSM3 PE=1 SV=2
1608	1368	Q5TFE4|NT5D1_HUMAN	61.83	16	5	5	Carbamidomethylation; Deamidation (NQ)	372000000	420000000	289000000	495000000	558000000	237000000	656000000	511000000	418000000	551000000	604000000	456000000	512000000	544000000	344000000	770000000	769000000	614000000	0.67:0.76:0.52:0.90:1.01:0.43:1.19:0.93:0.76:1.00:1.10:0.83:0.93:0.99:0.62:1.40:1.40:1.11	360000000	488000000	528000000	537000000	466000000	718000000	0.67:0.91:0.98:1.00:0.87:1.34	51845	5'-nucleotidase domain-containing protein 1 OS=Homo sapiens GN=NT5DC1 PE=1 SV=1
1791	1335	P82979|SARNP_HUMAN	61.6	24	4	4	Acetylation (N-term)	601000000	723000000	502000000	916000000	1100000000	758000000	1270000000	670000000	497000000	1150000000	1120000000	829000000	784000000	744000000	563000000	1430000000	1330000000	879000000	0.52:0.63:0.44:0.80:0.96:0.66:1.11:0.58:0.43:1.00:0.98:0.72:0.68:0.65:0.49:1.24:1.16:0.77	609000000	924000000	877000000	1030000000	697000000	1210000000	0.59:0.89:0.85:1.00:0.67:1.17	23671	SAP domain-containing ribonucleoprotein OS=Homo sapiens GN=SARNP PE=1 SV=3
325	428	Q16891|MIC60_HUMAN	61.51	26	14	14	Citrullination	1190000000	1240000000	1000000000	1480000000	1010000000	976000000	2300000000	1910000000	1660000000	2350000000	2350000000	1680000000	1640000000	1740000000	1160000000	2470000000	2520000000	1850000000	0.51:0.53:0.43:0.63:0.43:0.42:0.98:0.82:0.71:1.00:1.00:0.72:0.70:0.74:0.49:1.05:1.07:0.79	1170000000	1230000000	1960000000	2330000000	1510000000	2280000000	0.50:0.53:0.84:1.00:0.65:0.98	83678	MICOS complex subunit MIC60 OS=Homo sapiens GN=IMMT PE=1 SV=1
2149	1476	Q99627|CSN8_HUMAN	61.46	35	5	5	Deamidation (NQ)	655000000	438000000	600000000	981000000	1040000000	759000000	696000000	805000000	682000000	1000000000	1350000000	789000000	1170000000	1340000000	854000000	1330000000	1030000000	884000000	0.65:0.44:0.60:0.98:1.04:0.76:0.70:0.80:0.68:1.00:1.35:0.79:1.17:1.34:0.85:1.33:1.03:0.88	564000000	927000000	727000000	1050000000	1120000000	1080000000	0.54:0.88:0.69:1.00:1.07:1.03	23226	COP9 signalosome complex subunit 8 OS=Homo sapiens GN=COPS8 PE=1 SV=1
6097	3385	P51157|RAB28_HUMAN	61.38	5	1	1	Acetylation (N-term); Deamidation (NQ)	1240000000	1100000000	1560000000	1990000000	1500000000	937000000	1530000000	1370000000	1430000000	3190000000	2760000000	2410000000	1170000000	1620000000	789000000	3140000000	3270000000	1330000000	0.39:0.34:0.49:0.62:0.47:0.29:0.48:0.43:0.45:1.00:0.86:0.76:0.37:0.51:0.25:0.98:1.02:0.42	1300000000	1480000000	1440000000	2790000000	1250000000	2650000000	0.47:0.53:0.52:1.00:0.45:0.95	24841	Ras-related protein Rab-28 OS=Homo sapiens GN=RAB28 PE=1 SV=2
1739	1427	P49903|SPS1_HUMAN	61.33	16	4	4		645000000	453000000	348000000	514000000	604000000	420000000	334000000	615000000	424000000	566000000	918000000	509000000	201000000	337000000	190000000	662000000	503000000	701000000	1.14:0.80:0.62:0.91:1.07:0.74:0.59:1.09:0.75:1.00:1.62:0.90:0.36:0.59:0.34:1.17:0.89:1.24	482000000	545000000	457000000	664000000	243000000	625000000	0.73:0.82:0.69:1.00:0.37:0.94	42911	Selenide water dikinase 1 OS=Homo sapiens GN=SEPHS1 PE=1 SV=2
598	1312	Q13620|CUL4B_HUMAN	61.28	13	10	5	Phosphorylation (STY); Pyro-glu from Q; Acetylation (N-term)	96700000	65700000	83900000	129000000	102000000	139000000	151000000	150000000	155000000	217000000	165000000	177000000	34300000	122000000	8440000	313000000	286000000	211000000	0.44:0.30:0.39:0.59:0.47:0.64:0.69:0.69:0.71:1.00:0.76:0.81:0.16:0.56:0.04:1.44:1.32:0.97	83100000	123000000	152000000	186000000	55300000	270000000	0.45:0.66:0.81:1.00:0.30:1.45	103982	Cullin-4B OS=Homo sapiens GN=CUL4B PE=1 SV=4
5552	32121	Q9UBX3|DIC_HUMAN	61.25	5	1	1	Carbamidomethylation	134000000	123000000	87000000	184000000	172000000	121000000	123000000	180000000	158000000	302000000	163000000	195000000	170000000	178000000	88200000	251000000	246000000	185000000	0.44:0.41:0.29:0.61:0.57:0.40:0.41:0.60:0.52:1.00:0.54:0.65:0.56:0.59:0.29:0.83:0.81:0.61	114000000	159000000	154000000	248000000	145000000	227000000	0.46:0.64:0.62:1.00:0.58:0.92	31282	Mitochondrial dicarboxylate carrier OS=Homo sapiens GN=SLC25A10 PE=1 SV=2
1641	761	O15145|ARPC3_HUMAN	61.11	25	4	4		551000000	886000000	499000000	545000000	938000000	537000000	601000000	610000000	442000000	300000000	270000000	207000000	450000000	408000000	291000000	582000000	109000000	284000000	1.84:2.95:1.66:1.81:3.12:1.79:2.00:2.03:1.47:1.00:0.90:0.69:1.50:1.36:0.97:1.94:0.36:0.95	645000000	673000000	552000000	259000000	383000000	428000000	2.49:2.60:2.13:1.00:1.48:1.66	20547	Actin-related protein 2/3 complex subunit 3 OS=Homo sapiens GN=ARPC3 PE=1 SV=3
3043	55390	Q92947|GCDH_HUMAN	61.09	13	3	3	Carbamidomethylation; Phosphorylation (STY); Citrullination	634000000	865000000	662000000	207000000	1960000000	1190000000	833000000	760000000	723000000	226000000	135000000	250000000	181000000	160000000	827000000	219000000	329000000	1300000000	2.81:3.83:2.93:0.92:8.69:5.27:3.68:3.36:3.20:1.00:0.60:1.11:0.80:0.71:3.66:0.97:1.46:5.75	768000000	1650000000	823000000	265000000	856000000	717000000	2.90:6.25:3.11:1.00:3.23:2.71	48127	Glutaryl-CoA dehydrogenase mitochondrial OS=Homo sapiens GN=GCDH PE=1 SV=1
245	273	P61981|1433G_HUMAN	60.95	35	6	4	Carbamidomethylation; Acetylation (N-term); Deamidation (NQ)	2740000000	2240000000	2390000000	3550000000	3390000000	3820000000	2900000000	4490000000	4370000000	5110000000	3900000000	4810000000	3880000000	4200000000	3080000000	5180000000	4640000000	4790000000	0.54:0.44:0.47:0.69:0.66:0.75:0.57:0.88:0.86:1.00:0.76:0.94:0.76:0.82:0.60:1.01:0.91:0.94	2460000000	3730000000	3920000000	4720000000	3950000000	4920000000	0.52:0.79:0.83:1.00:0.84:1.04	28303	14-3-3 protein gamma OS=Homo sapiens GN=YWHAG PE=1 SV=2
2101	1273	Q9NY12|GAR1_HUMAN	60.71	25	4	4	Carbamidomethylation	307000000	460000000	360000000	607000000	697000000	425000000	272000000	334000000	268000000	419000000	534000000	279000000	531000000	572000000	354000000	658000000	648000000	394000000	0.73:1.10:0.86:1.45:1.66:1.01:0.65:0.80:0.64:1.00:1.27:0.67:1.27:1.36:0.84:1.57:1.55:0.94	404000000	576000000	291000000	411000000	485000000	567000000	0.98:1.40:0.71:1.00:1.18:1.38	22348	H/ACA ribonucleoprotein complex subunit 1 OS=Homo sapiens GN=GAR1 PE=1 SV=1
1580	1446	P31350|RIR2_HUMAN	60.64	10	3	3	Phosphorylation (STY)	384000000	459000000	376000000	462000000	582000000	314000000	425000000	456000000	453000000	437000000	460000000	358000000	509000000	436000000	370000000	937000000	935000000	541000000	0.88:1.05:0.86:1.06:1.33:0.72:0.97:1.04:1.04:1.00:1.05:0.82:1.16:1.00:0.85:2.14:2.14:1.24	407000000	453000000	445000000	418000000	438000000	857000000	0.97:1.08:1.06:1.00:1.05:2.05	44878	Ribonucleoside-diphosphate reductase subunit M2 OS=Homo sapiens GN=RRM2 PE=1 SV=1
69	403	P67809|YBOX1_HUMAN	60.52	51	12	8	Acetylation (N-term); Oxidation (M); Deamidation (NQ); Citrullination; Phosphorylation (STY)	2430000000	2440000000	4480000000	3440000000	4030000000	5870000000	3010000000	2410000000	3130000000	6180000000	5930000000	4660000000	5980000000	6150000000	4780000000	1450000000	10400000000	5090000000	0.39:0.40:0.73:0.56:0.65:0.95:0.49:0.39:0.51:1.00:0.96:0.75:0.97:1.00:0.77:0.23:1.68:0.82	3160000000	4460000000	2870000000	5590000000	5640000000	5660000000	0.56:0.80:0.51:1.00:1.01:1.01	35924	Nuclease-sensitive element-binding protein 1 OS=Homo sapiens GN=YBX1 PE=1 SV=3
4187	34831	Q9NNW5|WDR6_HUMAN	60.5	3	3	3	Acetylation (N-term)	296000000	399000000	647000000	660000000	275000000	546000000	795000000	633000000	1050000000	785000000	535000000	811000000	360000000	547000000	303000000	788000000	867000000	516000000	0.38:0.51:0.82:0.84:0.35:0.70:1.01:0.81:1.34:1.00:0.68:1.03:0.46:0.70:0.39:1.00:1.10:0.66	447000000	494000000	826000000	710000000	403000000	761000000	0.63:0.70:1.16:1.00:0.57:1.07	121724	WD repeat-containing protein 6 OS=Homo sapiens GN=WDR6 PE=1 SV=1
482	1388	Q15154|PCM1_HUMAN	60.18	12	14	13	Phosphorylation (STY); Carbamidomethylation; Acetylation (N-term); Oxidation (HW); Pyro-glu from Q	267000000	288000000	204000000	345000000	282000000	221000000	245000000	329000000	209000000	409000000	436000000	315000000	374000000	330000000	272000000	551000000	616000000	332000000	0.65:0.70:0.50:0.84:0.69:0.54:0.60:0.80:0.51:1.00:1.07:0.77:0.91:0.81:0.67:1.35:1.51:0.81	253000000	283000000	261000000	387000000	325000000	500000000	0.66:0.73:0.67:1.00:0.84:1.29	228531	Pericentriolar material 1 protein OS=Homo sapiens GN=PCM1 PE=1 SV=4
402	476	Q32MZ4|LRRF1_HUMAN	60.15	23	14	14	Carbamidomethylation; Acetylation (N-term); Deamidation (NQ); Phosphorylation (STY)	971000000	950000000	819000000	1820000000	1430000000	1530000000	796000000	824000000	802000000	1170000000	1540000000	855000000	1140000000	1250000000	898000000	1750000000	2050000000	1140000000	0.83:0.81:0.70:1.55:1.22:1.31:0.68:0.70:0.69:1.00:1.31:0.73:0.98:1.07:0.77:1.50:1.75:0.98	913000000	1590000000	807000000	1190000000	1100000000	1650000000	0.77:1.34:0.68:1.00:0.92:1.39	89253	Leucine-rich repeat flightless-interacting protein 1 OS=Homo sapiens GN=LRRFIP1 PE=1 SV=2
1046	856	O75955|FLOT1_HUMAN	60.15	16	5	5	Acetylation (N-term); Deamidation (NQ)	618000000	666000000	502000000	845000000	812000000	562000000	490000000	382000000	253000000	720000000	661000000	476000000	795000000	502000000	488000000	971000000	972000000	586000000	0.86:0.92:0.70:1.17:1.13:0.78:0.68:0.53:0.35:1.00:0.92:0.66:1.10:0.70:0.68:1.35:1.35:0.81	595000000	740000000	388000000	619000000	639000000	843000000	0.96:1.19:0.63:1.00:1.03:1.36	47355	Flotillin-1 OS=Homo sapiens GN=FLOT1 PE=1 SV=3
1812	1747	Q6NYC8|PPR18_HUMAN	60.13	9	3	3		219000000	140000000	174000000	194000000	236000000	179000000	227000000	454000000	302000000	339000000	553000000	198000000	385000000	522000000	435000000	847000000	302000000	619000000	0.65:0.41:0.51:0.57:0.70:0.53:0.67:1.34:0.89:1.00:1.63:0.58:1.14:1.54:1.28:2.50:0.89:1.83	177000000	203000000	328000000	418000000	447000000	660000000	0.42:0.49:0.78:1.00:1.07:1.58	67943	Phostensin OS=Homo sapiens GN=PPP1R18 PE=1 SV=1
197	617	Q14978|NOLC1_HUMAN	59.9	9	5	5	Phosphorylation (STY)	594000000	608000000	464000000	365000000	429000000	251000000	274000000	284000000	237000000	329000000	297000000	199000000	512000000	486000000	350000000	1320000000	1250000000	706000000	1.81:1.85:1.41:1.11:1.30:0.76:0.83:0.86:0.72:1.00:0.90:0.60:1.56:1.48:1.06:4.01:3.82:2.15	555000000	348000000	267000000	275000000	449000000	1090000000	2.02:1.27:0.97:1.00:1.63:3.98	73603	Nucleolar and coiled-body phosphoprotein 1 OS=Homo sapiens GN=NOLC1 PE=1 SV=2
924	3046	O75592|MYCB2_HUMAN	59.78	1	2	2	Phosphorylation (STY); Pyro-glu from Q; Deamidation (NQ)	43600000	39300000	41700000	26500000	10500000	20400000	41500000	32900000	31700000	30000000	19700000	29000000	2260000	2890000	1220000	51400000	54800000	35900000	1.45:1.31:1.39:0.88:0.35:0.68:1.38:1.10:1.06:1.00:0.66:0.97:0.08:0.10:0.04:1.71:1.83:1.20	41500000	19100000	35400000	26200000	2130000	47300000	1.58:0.73:1.35:1.00:0.08:1.81	510091	E3 ubiquitin-protein ligase MYCBP2 OS=Homo sapiens GN=MYCBP2 PE=1 SV=3
112	66	O75643|U520_HUMAN	59.65	16	27	27	Carbamidomethylation; Phosphorylation (STY); Deamidation (NQ)	1060000000	741000000	813000000	1320000000	1240000000	1050000000	1970000000	1410000000	1210000000	1340000000	1280000000	994000000	1440000000	1480000000	1040000000	1860000000	1970000000	1310000000	0.79:0.55:0.61:0.98:0.92:0.78:1.47:1.05:0.90:1.00:0.95:0.74:1.07:1.10:0.77:1.39:1.47:0.97	1000000000	1200000000	1530000000	1200000000	1320000000	1710000000	0.83:1.00:1.27:1.00:1.09:1.42	244505	U5 small nuclear ribonucleoprotein 200 kDa helicase OS=Homo sapiens GN=SNRNP200 PE=1 SV=2
261	441	Q9UQE7|SMC3_HUMAN	59.44	15	14	14	Acetylation (N-term); Deamidation (NQ)	689000000	596000000	651000000	974000000	782000000	814000000	938000000	438000000	723000000	781000000	736000000	678000000	845000000	787000000	740000000	1250000000	1680000000	872000000	0.88:0.76:0.83:1.25:1.00:1.04:1.20:0.56:0.93:1.00:0.94:0.87:1.08:1.01:0.95:1.60:2.15:1.12	658000000	894000000	705000000	737000000	812000000	1280000000	0.89:1.21:0.96:1.00:1.10:1.74	141541	Structural maintenance of chromosomes protein 3 OS=Homo sapiens GN=SMC3 PE=1 SV=2
387	633	Q92900|RENT1_HUMAN	59.43	17	12	12	Carbamidomethylation; Acetylation (N-term); Phosphorylation (STY)	887000000	1020000000	648000000	1150000000	1110000000	1010000000	878000000	1370000000	761000000	1230000000	1230000000	1030000000	1230000000	1190000000	1030000000	1750000000	1810000000	1460000000	0.72:0.83:0.53:0.94:0.90:0.82:0.71:1.11:0.62:1.00:0.99:0.84:1.00:0.97:0.83:1.42:1.46:1.18	852000000	1090000000	1000000000	1160000000	1150000000	1670000000	0.73:0.94:0.86:1.00:0.99:1.44	124345	Regulator of nonsense transcripts 1 OS=Homo sapiens GN=UPF1 PE=1 SV=2
448	622	P01903|DRA_HUMAN	59.3	26	8	7	Carbamidomethylation; Acetylation (N-term); Deamidation (NQ)	4720000000	5370000000	3010000000	8150000000	8850000000	5630000000	3480000000	5230000000	2830000000	6330000000	4270000000	3600000000	4650000000	3920000000	2850000000	5000000000	6470000000	2770000000	0.75:0.85:0.48:1.29:1.40:0.89:0.55:0.83:0.45:1.00:0.68:0.57:0.73:0.62:0.45:0.79:1.02:0.44	4370000000	7540000000	4020000000	4730000000	3810000000	4750000000	0.92:1.59:0.85:1.00:0.80:1.00	28607	HLA class II histocompatibility antigen DR alpha chain OS=Homo sapiens GN=HLA-DRA PE=1 SV=1
1401	708	Q9H8Y8|GORS2_HUMAN	59.29	30	7	7	Carbamidomethylation	1660000000	1650000000	1170000000	2000000000	1760000000	1070000000	3670000000	2580000000	1420000000	1880000000	2510000000	1570000000	1840000000	1880000000	1410000000	3550000000	2760000000	2480000000	0.88:0.88:0.62:1.06:0.93:0.57:1.95:1.37:0.76:1.00:1.33:0.83:0.98:1.00:0.75:1.89:1.47:1.32	1490000000	1610000000	2560000000	1990000000	1710000000	2930000000	0.75:0.81:1.29:1.00:0.86:1.47	47145	Golgi reassembly-stacking protein 2 OS=Homo sapiens GN=GORASP2 PE=1 SV=3
2524	2075	Q9Y676|RT18B_HUMAN	59.26	22	3	3		303000000	338000000	270000000	438000000	467000000	415000000	286000000	220000000	191000000	380000000	426000000	282000000	281000000	118000000	84100000	535000000	775000000	476000000	0.80:0.89:0.71:1.15:1.23:1.09:0.75:0.58:0.50:1.00:1.12:0.74:0.74:0.31:0.22:1.41:2.04:1.25	304000000	440000000	266000000	363000000	161000000	595000000	0.84:1.21:0.73:1.00:0.44:1.64	29396	28S ribosomal protein S18b mitochondrial OS=Homo sapiens GN=MRPS18B PE=1 SV=1
1101	937	O00178|GTPB1_HUMAN	59.16	10	4	4	Phosphorylation (STY)	224000000	269000000	162000000	267000000	311000000	264000000	290000000	233000000	207000000	243000000	396000000	248000000	265000000	260000000	195000000	485000000	459000000	338000000	0.92:1.10:0.66:1.10:1.28:1.08:1.19:0.96:0.85:1.00:1.62:1.02:1.09:1.07:0.80:1.99:1.88:1.39	218000000	332000000	266000000	296000000	240000000	427000000	0.74:1.12:0.90:1.00:0.81:1.45	72454	GTP-binding protein 1 OS=Homo sapiens GN=GTPBP1 PE=1 SV=3
1227	1291	P52292|IMA1_HUMAN	59.07	16	7	7	Carbamidomethylation; Acetylation (N-term); Deamidation (NQ)	350000000	387000000	308000000	450000000	522000000	325000000	447000000	485000000	358000000	504000000	569000000	410000000	378000000	376000000	301000000	833000000	760000000	451000000	0.69:0.77:0.61:0.89:1.03:0.64:0.89:0.96:0.71:1.00:1.13:0.81:0.75:0.75:0.60:1.65:1.51:0.90	348000000	432000000	430000000	494000000	351000000	792000000	0.70:0.87:0.87:1.00:0.71:1.60	57862	Importin subunit alpha-1 OS=Homo sapiens GN=KPNA2 PE=1 SV=1
734	1248	Q9H2G2|SLK_HUMAN	58.79	5	5	3	Carbamidomethylation; Phosphorylation (STY); Pyro-glu from E	376000000	439000000	911000000	556000000	367000000	537000000	899000000	616000000	1340000000	1480000000	883000000	1620000000	512000000	619000000	436000000	1820000000	1860000000	1700000000	0.25:0.30:0.62:0.38:0.25:0.36:0.61:0.42:0.91:1.00:0.60:1.09:0.35:0.42:0.29:1.23:1.26:1.15	575000000	487000000	952000000	1330000000	522000000	1790000000	0.43:0.37:0.72:1.00:0.39:1.35	142695	STE20-like serine/threonine-protein kinase OS=Homo sapiens GN=SLK PE=1 SV=1
320	489	P39023|RL3_HUMAN	58.79	24	9	8	Deamidation (NQ); Carbamidomethylation; Oxidation (M); Acetylation (N-term)	2180000000	1700000000	978000000	1340000000	2610000000	1550000000	765000000	602000000	1830000000	3640000000	3780000000	2230000000	2870000000	1500000000	1900000000	2890000000	2350000000	1570000000	0.60:0.47:0.27:0.37:0.72:0.43:0.21:0.17:0.50:1.00:1.04:0.61:0.79:0.41:0.52:0.79:0.65:0.43	2070000000	2100000000	1330000000	3210000000	2090000000	2270000000	0.64:0.65:0.41:1.00:0.65:0.71	46109	60S ribosomal protein L3 OS=Homo sapiens GN=RPL3 PE=1 SV=2
1969	2325	O15446|RPA34_HUMAN	58.75	13	3	3	Carbamidomethylation	162000000	202000000	114000000	328000000	153000000	274000000	261000000	211000000	180000000	239000000	303000000	208000000	261000000	189000000	161000000	293000000	383000000	257000000	0.68:0.84:0.48:1.38:0.64:1.15:1.09:0.88:0.76:1.00:1.27:0.87:1.09:0.79:0.67:1.23:1.60:1.08	159000000	290000000	242000000	250000000	203000000	311000000	0.64:1.16:0.97:1.00:0.81:1.24	54986	DNA-directed RNA polymerase I subunit RPA34 OS=Homo sapiens GN=CD3EAP PE=1 SV=1
258	117	P34897|GLYM_HUMAN	58.71	38	18	17	Carbamidomethylation; Pyro-glu from Q; Deamidation (NQ); Phosphorylation (STY)	1870000000	2110000000	1450000000	2910000000	2100000000	2550000000	1640000000	2210000000	1240000000	2820000000	2030000000	1760000000	2390000000	2110000000	1820000000	3510000000	4880000000	2220000000	0.66:0.75:0.51:1.03:0.75:0.90:0.58:0.78:0.44:1.00:0.72:0.62:0.85:0.75:0.65:1.24:1.73:0.79	1930000000	2520000000	1930000000	2230000000	2110000000	3770000000	0.87:1.13:0.87:1.00:0.94:1.69	55993	Serine hydroxymethyltransferase mitochondrial OS=Homo sapiens GN=SHMT2 PE=1 SV=3
2139	32133	Q96PZ0|PUS7_HUMAN	58.6	11	5	5		235000000	233000000	194000000	184000000	343000000	190000000	146000000	280000000	179000000	246000000	320000000	171000000	216000000	333000000	236000000	515000000	373000000	405000000	0.96:0.95:0.79:0.75:1.39:0.77:0.59:1.14:0.73:1.00:1.30:0.70:0.88:1.35:0.96:2.09:1.51:1.65	221000000	239000000	202000000	246000000	261000000	431000000	0.90:0.97:0.82:1.00:1.06:1.75	75035	Pseudouridylate synthase 7 homolog OS=Homo sapiens GN=PUS7 PE=1 SV=2
1219	1210	Q92575|UBXN4_HUMAN	58.58	18	3	3	Carbamidomethylation	377000000	372000000	387000000	455000000	523000000	331000000	341000000	487000000	454000000	543000000	799000000	413000000	689000000	1030000000	479000000	929000000	637000000	653000000	0.69:0.69:0.71:0.84:0.96:0.61:0.63:0.90:0.84:1.00:1.47:0.76:1.27:1.90:0.88:1.71:1.17:1.20	379000000	436000000	427000000	585000000	733000000	739000000	0.65:0.75:0.73:1.00:1.25:1.26	56778	UBX domain-containing protein 4 OS=Homo sapiens GN=UBXN4 PE=1 SV=2
2268	1512	O15212|PFD6_HUMAN	58.32	28	5	5	Acetylation (N-term); Deamidation (NQ)	1250000000	1370000000	1320000000	1740000000	2290000000	1320000000	2140000000	1930000000	1640000000	2610000000	1830000000	1770000000	2570000000	2280000000	1810000000	2930000000	2600000000	2160000000	0.48:0.53:0.51:0.67:0.88:0.51:0.82:0.74:0.63:1.00:0.70:0.68:0.99:0.87:0.70:1.12:1.00:0.83	1320000000	1790000000	1900000000	2070000000	2220000000	2630000000	0.64:0.86:0.92:1.00:1.07:1.27	14583	Prefoldin subunit 6 OS=Homo sapiens GN=PFDN6 PE=1 SV=1
119	141	P15311|EZRI_HUMAN	58.17	34	19	11	Acetylation (N-term); Deamidation (NQ); Pyro-glu from Q; Carbamidomethylation; Oxidation (M)	3420000000	3500000000	3610000000	5000000000	5190000000	4920000000	5780000000	4700000000	5400000000	7360000000	5780000000	6640000000	5560000000	5780000000	4430000000	7550000000	8220000000	4760000000	0.47:0.48:0.49:0.68:0.71:0.67:0.79:0.64:0.73:1.00:0.79:0.90:0.76:0.79:0.60:1.03:1.12:0.65	3510000000	5060000000	5760000000	6590000000	5260000000	7100000000	0.53:0.77:0.87:1.00:0.80:1.08	69413	Ezrin OS=Homo sapiens GN=EZR PE=1 SV=4
315	219	P31930|QCR1_HUMAN	58.16	39	14	14	Carbamidomethylation; Deamidation (NQ); Pyro-glu from Q	4810000000	2290000000	2740000000	2540000000	4620000000	2000000000	984000000	5200000000	721000000	3880000000	4100000000	2160000000	5120000000	5290000000	3030000000	3080000000	5690000000	3080000000	1.24:0.59:0.71:0.65:1.19:0.51:0.25:1.34:0.19:1.00:1.06:0.56:1.32:1.36:0.78:0.79:1.46:0.79	3950000000	4540000000	4830000000	3490000000	4540000000	5030000000	1.13:1.30:1.38:1.00:1.30:1.44	52646	Cytochrome b-c1 complex subunit 1 mitochondrial OS=Homo sapiens GN=UQCRC1 PE=1 SV=3
2533	20549	P07339|CATD_HUMAN	58.15	16	4	4	Carbamidomethylation	427000000	439000000	403000000	625000000	635000000	478000000	591000000	587000000	492000000	432000000	477000000	455000000	486000000	494000000	454000000	922000000	758000000	790000000	0.99:1.02:0.93:1.45:1.47:1.11:1.37:1.36:1.14:1.00:1.10:1.05:1.13:1.14:1.05:2.13:1.75:1.83	423000000	579000000	557000000	454000000	478000000	823000000	0.93:1.27:1.22:1.00:1.05:1.81	44552	Cathepsin D OS=Homo sapiens GN=CTSD PE=1 SV=1
1718	1097	P51148|RAB5C_HUMAN	58.14	27	5	2	Pyro-glu from Q	391000000	379000000	328000000	359000000	335000000	282000000	336000000	88300000	77600000	401000000	338000000	275000000	307000000	321000000	217000000	387000000	389000000	262000000	0.97:0.94:0.82:0.89:0.84:0.70:0.84:0.22:0.19:1.00:0.84:0.69:0.77:0.80:0.54:0.97:0.97:0.65	366000000	325000000	342000000	338000000	282000000	346000000	1.08:0.96:1.01:1.00:0.83:1.02	23483	Ras-related protein Rab-5C OS=Homo sapiens GN=RAB5C PE=1 SV=2
472	300	P41091|IF2G_HUMAN	58.03	31	11	11	Carbamidomethylation; Pyro-glu from Q; Acetylation (N-term); Deamidation (NQ)	2900000000	2710000000	2320000000	3830000000	4660000000	2760000000	4450000000	3490000000	3580000000	4710000000	5090000000	3510000000	3380000000	4040000000	2160000000	6280000000	5200000000	3920000000	0.62:0.57:0.49:0.81:0.99:0.59:0.94:0.74:0.76:1.00:1.08:0.75:0.72:0.86:0.46:1.33:1.11:0.83	2640000000	3750000000	3840000000	4430000000	3200000000	5340000000	0.60:0.85:0.87:1.00:0.72:1.20	51110	Eukaryotic translation initiation factor 2 subunit 3 OS=Homo sapiens GN=EIF2S3 PE=1 SV=3
4004	2851	Q13526|PIN1_HUMAN	58	21	2	2	Carbamidomethylation	354000000	440000000	239000000	547000000	337000000	457000000	463000000	515000000	271000000	448000000	315000000	381000000	470000000	382000000	234000000	622000000	884000000	504000000	0.79:0.98:0.54:1.22:0.75:1.02:1.03:1.15:0.61:1.00:0.70:0.85:1.05:0.85:0.52:1.39:1.98:1.13	345000000	447000000	471000000	381000000	420000000	670000000	0.90:1.17:1.24:1.00:1.10:1.76	18243	Peptidyl-prolyl cis-trans isomerase NIMA-interacting 1 OS=Homo sapiens GN=PIN1 PE=1 SV=1
727	1987	Q709C8|VP13C_HUMAN	57.89	2	5	5	Deamidation (NQ)	181000000	183000000	135000000	188000000	125000000	145000000	264000000	211000000	140000000	243000000	251000000	144000000	176000000	158000000	83700000	337000000	378000000	255000000	0.74:0.75:0.56:0.77:0.52:0.60:1.09:0.87:0.58:1.00:1.03:0.59:0.72:0.65:0.34:1.39:1.56:1.05	166000000	172000000	205000000	213000000	151000000	323000000	0.78:0.81:0.96:1.00:0.71:1.52	422393	Vacuolar protein sorting-associated protein 13C OS=Homo sapiens GN=VPS13C PE=1 SV=1
952	627	O43684|BUB3_HUMAN	57.74	24	7	7	Acetylation (N-term); Deamidation (NQ); Oxidation (M)	1110000000	1120000000	1730000000	2070000000	1320000000	1380000000	809000000	662000000	990000000	2020000000	1480000000	1580000000	1600000000	1540000000	1540000000	2070000000	2880000000	1160000000	0.55:0.55:0.86:1.03:0.66:0.68:0.40:0.33:0.49:1.00:0.73:0.78:0.79:0.76:0.76:1.03:1.42:0.58	1320000000	1590000000	820000000	1690000000	1560000000	2040000000	0.78:0.94:0.48:1.00:0.92:1.20	37155	Mitotic checkpoint protein BUB3 OS=Homo sapiens GN=BUB3 PE=1 SV=1
1267	955	Q15008|PSMD6_HUMAN	57.71	24	8	8	Carbamidomethylation	453000000	756000000	384000000	205000000	525000000	141000000	434000000	425000000	402000000	312000000	307000000	212000000	295000000	328000000	197000000	457000000	331000000	267000000	1.45:2.43:1.23:0.66:1.68:0.45:1.39:1.36:1.29:1.00:0.98:0.68:0.95:1.05:0.63:1.47:1.06:0.86	531000000	311000000	420000000	292000000	273000000	351000000	1.82:1.07:1.44:1.00:0.94:1.20	45531	26S proteasome non-ATPase regulatory subunit 6 OS=Homo sapiens GN=PSMD6 PE=1 SV=1
1686	1279	Q13618|CUL3_HUMAN	57.66	6	4	4	Carbamidomethylation	304000000	307000000	237000000	403000000	496000000	334000000	222000000	232000000	181000000	352000000	332000000	273000000	363000000	394000000	247000000	310000000	409000000	310000000	0.86:0.87:0.67:1.14:1.41:0.95:0.63:0.66:0.51:1.00:0.94:0.78:1.03:1.12:0.70:0.88:1.16:0.88	282000000	411000000	212000000	319000000	335000000	375000000	0.88:1.29:0.66:1.00:1.05:1.17	88930	Cullin-3 OS=Homo sapiens GN=CUL3 PE=1 SV=2
1154	1194	O43719|HTSF1_HUMAN	57.58	19	8	8	Acetylation (N-term); Phosphorylation (STY)	388000000	321000000	339000000	352000000	520000000	365000000	471000000	476000000	494000000	467000000	487000000	479000000	565000000	527000000	460000000	758000000	698000000	577000000	0.83:0.69:0.72:0.75:1.11:0.78:1.01:1.02:1.06:1.00:1.04:1.02:1.21:1.13:0.99:1.62:1.49:1.24	349000000	412000000	489000000	477000000	517000000	678000000	0.73:0.86:1.02:1.00:1.08:1.42	85853	HIV Tat-specific factor 1 OS=Homo sapiens GN=HTATSF1 PE=1 SV=1
1701	1721	Q9NYV4|CDK12_HUMAN	57.56	1	1	1	Phosphorylation (STY); Pyro-glu from Q	35000000	41200000	21300000	33000000	22200000	33800000	51100000	39700000	63300000	38000000	34700000	50700000	73200000	57300000	58700000	101000000	103000000	87300000	0.92:1.09:0.56:0.87:0.59:0.89:1.35:1.05:1.67:1.00:0.91:1.34:1.93:1.51:1.55:2.66:2.72:2.30	32500000	29700000	51400000	41100000	63100000	97200000	0.79:0.72:1.25:1.00:1.53:2.37	164154	Cyclin-dependent kinase 12 OS=Homo sapiens GN=CDK12 PE=1 SV=2
2119	12841	Q9Y2T2|AP3M1_HUMAN	57.53	11	3	3	Carbamidomethylation	258000000	146000000	154000000	111000000	228000000	251000000	292000000	229000000	135000000	294000000	283000000	271000000	225000000	224000000	151000000	387000000	393000000	303000000	0.88:0.50:0.52:0.38:0.77:0.85:0.99:0.78:0.46:1.00:0.96:0.92:0.77:0.76:0.51:1.31:1.34:1.03	203000000	253000000	303000000	283000000	200000000	361000000	0.72:0.89:1.07:1.00:0.71:1.28	46939	AP-3 complex subunit mu-1 OS=Homo sapiens GN=AP3M1 PE=1 SV=1
706	826	Q06187|BTK_HUMAN	57.5	24	11	11	Carbamidomethylation; Deamidation (NQ); Phosphorylation (STY)	776000000	360000000	572000000	758000000	985000000	488000000	762000000	441000000	883000000	864000000	933000000	644000000	547000000	1010000000	322000000	1400000000	948000000	963000000	0.90:0.42:0.66:0.88:1.14:0.57:0.88:0.51:1.02:1.00:1.08:0.75:0.63:1.17:0.37:1.62:1.10:1.11	570000000	744000000	696000000	814000000	626000000	1110000000	0.70:0.91:0.85:1.00:0.77:1.37	76281	Tyrosine-protein kinase BTK OS=Homo sapiens GN=BTK PE=1 SV=3
1044	806	Q96RP9|EFGM_HUMAN	57.47	7	4	4		350000000	356000000	203000000	563000000	569000000	319000000	432000000	452000000	258000000	475000000	585000000	318000000	498000000	603000000	305000000	681000000	651000000	430000000	0.74:0.75:0.43:1.19:1.20:0.67:0.91:0.95:0.54:1.00:1.23:0.67:1.05:1.27:0.64:1.43:1.37:0.91	303000000	484000000	380000000	459000000	469000000	587000000	0.66:1.05:0.83:1.00:1.02:1.28	83472	Elongation factor G mitochondrial OS=Homo sapiens GN=GFM1 PE=1 SV=2
1637	1146	P35268|RL22_HUMAN	57.4	51	6	6	Carbamidomethylation; Acetylation (N-term); Deamidation (NQ)	4190000000	4520000000	3100000000	5440000000	7260000000	4170000000	3340000000	3430000000	2830000000	6150000000	7050000000	3990000000	4200000000	3520000000	2710000000	8590000000	8060000000	6250000000	0.68:0.73:0.50:0.88:1.18:0.68:0.54:0.56:0.46:1.00:1.15:0.65:0.68:0.57:0.44:1.40:1.31:1.02	3940000000	5650000000	3390000000	5730000000	3490000000	7630000000	0.69:0.99:0.59:1.00:0.61:1.33	14787	60S ribosomal protein L22 OS=Homo sapiens GN=RPL22 PE=1 SV=2
2518	1405	O95292|VAPB_HUMAN	57.33	19	3	2	Acetylation (N-term); Carbamidomethylation	381000000	549000000	285000000	902000000	879000000	557000000	423000000	406000000	378000000	685000000	621000000	485000000	754000000	471000000	374000000	504000000	1040000000	338000000	0.56:0.80:0.42:1.32:1.28:0.81:0.62:0.59:0.55:1.00:0.91:0.71:1.10:0.69:0.55:0.74:1.52:0.49	405000000	779000000	421000000	606000000	541000000	627000000	0.67:1.29:0.69:1.00:0.89:1.04	27228	Vesicle-associated membrane protein-associated protein B/C OS=Homo sapiens GN=VAPB PE=1 SV=3
1326	1207	Q9Y5K6|CD2AP_HUMAN	57.3	14	6	6		249000000	315000000	224000000	519000000	480000000	381000000	292000000	249000000	321000000	464000000	386000000	333000000	547000000	415000000	320000000	579000000	645000000	302000000	0.54:0.68:0.48:1.12:1.03:0.82:0.63:0.54:0.69:1.00:0.83:0.72:1.18:0.89:0.69:1.25:1.39:0.65	263000000	460000000	287000000	394000000	427000000	550000000	0.67:1.17:0.73:1.00:1.08:1.39	71451	CD2-associated protein OS=Homo sapiens GN=CD2AP PE=1 SV=1
573	935	O94925|GLSK_HUMAN	57.26	24	10	10	Carbamidomethylation; Citrullination	877000000	990000000	730000000	1120000000	1250000000	701000000	1090000000	1290000000	675000000	819000000	934000000	587000000	952000000	869000000	719000000	1680000000	1750000000	1590000000	1.07:1.21:0.89:1.37:1.53:0.86:1.33:1.58:0.83:1.00:1.14:0.72:1.16:1.06:0.88:2.06:2.14:1.95	866000000	1020000000	1020000000	780000000	847000000	1680000000	1.11:1.31:1.31:1.00:1.09:2.15	73461	Glutaminase kidney isoform mitochondrial OS=Homo sapiens GN=GLS PE=1 SV=1
830	1443	Q9UGI8|TES_HUMAN	57.12	19	5	5	Carbamidomethylation; Pyro-glu from Q	881000000	983000000	724000000	698000000	1190000000	392000000	752000000	473000000	863000000	1180000000	1360000000	779000000	289000000	786000000	315000000	656000000	426000000	256000000	0.75:0.84:0.62:0.59:1.01:0.33:0.64:0.40:0.73:1.00:1.16:0.66:0.25:0.67:0.27:0.56:0.36:0.22	1020000000	760000000	972000000	1200000000	849000000	446000000	0.85:0.64:0.81:1.00:0.71:0.37	47996	Testin OS=Homo sapiens GN=TES PE=1 SV=1
932	1853	O75691|UTP20_HUMAN	57.12	3	5	5		111000000	83100000	118000000	144000000	150000000	147000000	285000000	281000000	158000000	92400000	172000000	119000000	153000000	143000000	136000000	230000000	152000000	223000000	1.20:0.90:1.28:1.56:1.63:1.59:3.08:3.04:1.71:1.00:1.86:1.28:1.65:1.54:1.47:2.49:1.65:2.41	111000000	147000000	241000000	140000000	144000000	202000000	0.79:1.05:1.72:1.00:1.03:1.44	318385	Small subunit processome component 20 homolog OS=Homo sapiens GN=UTP20 PE=1 SV=3
276	286	Q92499|DDX1_HUMAN	57.12	29	17	17	Carbamidomethylation; Deamidation (NQ); Acetylation (N-term)	1020000000	868000000	778000000	1190000000	1610000000	760000000	1170000000	1050000000	1290000000	1260000000	1350000000	825000000	1180000000	1800000000	780000000	2250000000	1580000000	1320000000	0.81:0.69:0.62:0.94:1.28:0.60:0.93:0.84:1.02:1.00:1.08:0.66:0.94:1.43:0.62:1.79:1.26:1.05	941000000	1180000000	1170000000	1140000000	1250000000	1910000000	0.82:1.03:1.02:1.00:1.09:1.66	82432	ATP-dependent RNA helicase DDX1 OS=Homo sapiens GN=DDX1 PE=1 SV=2
1343	1588	Q9UNF0|PACN2_HUMAN	57.09	14	6	6	Carbamidomethylation; Deamidation (NQ)	446000000	216000000	471000000	537000000	1210000000	310000000	350000000	223000000	493000000	699000000	1100000000	411000000	189000000	784000000	121000000	759000000	365000000	491000000	0.64:0.31:0.67:0.77:1.74:0.44:0.50:0.32:0.71:1.00:1.58:0.59:0.27:1.12:0.17:1.09:0.52:0.70	430000000	687000000	398000000	742000000	593000000	740000000	0.58:0.93:0.54:1.00:0.80:1.00	55739	Protein kinase C and casein kinase substrate in neurons protein 2 OS=Homo sapiens GN=PACSIN2 PE=1 SV=2
3593	1991	Q9NYJ1|COA4_HUMAN	57.05	17	1	1		118000000	148000000	65600000	271000000	159000000	94900000	200000000	9020000	179000000	332000000	174000000	224000000	280000000	231000000	130000000	220000000	375000000	176000000	0.36:0.45:0.20:0.82:0.48:0.29:0.60:0.03:0.54:1.00:0.52:0.67:0.84:0.69:0.39:0.66:1.13:0.53	111000000	219000000	166000000	243000000	267000000	313000000	0.45:0.90:0.68:1.00:1.10:1.29	10134	Cytochrome c oxidase assembly factor 4 homolog mitochondrial OS=Homo sapiens GN=COA4 PE=1 SV=2
1533	2481	Q9BQ61|CS043_HUMAN	56.96	15	2	2	Pyro-glu from Q; Deamidation (NQ)	22100000	51200000	30000000	145000000	59500000	130000000	53500000	32400000	86900000	88700000	31600000	75400000	71100000	46200000	40100000	23400000	108000000	22400000	0.25:0.58:0.34:1.63:0.67:1.46:0.60:0.37:0.98:1.00:0.36:0.85:0.80:0.52:0.45:0.26:1.21:0.25	34400000	111000000	57600000	65200000	52500000	51200000	0.53:1.71:0.88:1.00:0.80:0.78	18419	Uncharacterized protein C19orf43 OS=Homo sapiens GN=C19orf43 PE=1 SV=1
1246	1236	P04632|CPNS1_HUMAN	56.95	24	4	4	Carbamidomethylation; Phosphorylation (STY)	406000000	284000000	322000000	419000000	302000000	401000000	462000000	758000000	320000000	511000000	376000000	324000000	709000000	439000000	570000000	892000000	932000000	510000000	0.80:0.56:0.63:0.82:0.59:0.79:0.90:1.48:0.63:1.00:0.74:0.63:1.39:0.86:1.12:1.75:1.82:1.00	363000000	374000000	598000000	440000000	573000000	778000000	0.82:0.85:1.36:1.00:1.30:1.77	28316	Calpain small subunit 1 OS=Homo sapiens GN=CAPNS1 PE=1 SV=1
1505	31999	Q9UJX4|APC5_HUMAN	56.94	13	6	6	Acetylation (N-term); Deamidation (NQ)	380000000	411000000	215000000	623000000	498000000	303000000	515000000	465000000	320000000	590000000	646000000	314000000	537000000	568000000	388000000	668000000	785000000	492000000	0.64:0.70:0.36:1.06:0.84:0.51:0.87:0.79:0.54:1.00:1.09:0.53:0.91:0.96:0.66:1.13:1.33:0.83	370000000	475000000	456000000	565000000	497000000	648000000	0.66:0.84:0.81:1.00:0.88:1.15	85077	Anaphase-promoting complex subunit 5 OS=Homo sapiens GN=ANAPC5 PE=1 SV=2
3143	9370	P60510|PP4C_HUMAN	56.89	9	3	3	Acetylation (N-term)	77100000	106000000	31900000	174000000	170000000	67200000	86500000	69300000	57300000	174000000	134000000	56100000	81500000	104000000	40900000	102000000	178000000	57600000	0.44:0.61:0.18:1.00:0.98:0.39:0.50:0.40:0.33:1.00:0.77:0.32:0.47:0.60:0.24:0.59:1.02:0.33	86500000	141000000	71000000	121000000	75600000	113000000	0.71:1.16:0.59:1.00:0.62:0.93	35080	Serine/threonine-protein phosphatase 4 catalytic subunit OS=Homo sapiens GN=PPP4C PE=1 SV=1
442	496	Q92973|TNPO1_HUMAN	56.86	14	10	9	Carbamidomethylation	1290000000	1410000000	972000000	1320000000	1210000000	959000000	1420000000	1480000000	959000000	1590000000	1230000000	1250000000	1910000000	2300000000	1070000000	2410000000	2880000000	1800000000	0.81:0.89:0.61:0.83:0.76:0.60:0.89:0.93:0.60:1.00:0.77:0.78:1.20:1.45:0.68:1.52:1.81:1.13	1220000000	1160000000	1360000000	1350000000	2020000000	2360000000	0.90:0.86:1.01:1.00:1.49:1.75	102355	Transportin-1 OS=Homo sapiens GN=TNPO1 PE=1 SV=2
2598	1776	Q02978|M2OM_HUMAN	56.83	10	2	2	Acetylation (N-term)	210000000	56900000	174000000	178000000	112000000	134000000	419000000	296000000	263000000	213000000	243000000	129000000	165000000	218000000	150000000	338000000	287000000	227000000	0.99:0.27:0.82:0.83:0.52:0.63:1.97:1.39:1.23:1.00:1.14:0.60:0.78:1.02:0.70:1.59:1.34:1.06	174000000	141000000	327000000	283000000	179000000	284000000	0.61:0.50:1.16:1.00:0.63:1.00	34062	Mitochondrial 2-oxoglutarate/malate carrier protein OS=Homo sapiens GN=SLC25A11 PE=1 SV=3
902	793	P22087|FBRL_HUMAN	56.78	30	8	8	Deamidation (NQ)	2030000000	2020000000	897000000	2290000000	2970000000	1710000000	675000000	1730000000	1210000000	2350000000	2440000000	1300000000	1850000000	2250000000	1000000000	3010000000	3370000000	1870000000	0.87:0.86:0.38:0.98:1.26:0.73:0.29:0.74:0.52:1.00:1.04:0.55:0.79:0.96:0.43:1.28:1.43:0.79	1840000000	2320000000	1260000000	2090000000	1730000000	2860000000	0.88:1.11:0.60:1.00:0.83:1.37	33784	rRNA 2'-O-methyltransferase fibrillarin OS=Homo sapiens GN=FBL PE=1 SV=2
2564	32203	Q5RKV6|EXOS6_HUMAN	56.78	8	1	1		13200000	19100000	4050000	39300000	37700000	38100000	35900000	41700000	17800000	38200000	64400000	34700000	53000000	55000000	62000000	41100000	65500000	46600000	0.34:0.50:0.11:1.03:0.99:1.00:0.94:1.09:0.47:1.00:1.68:0.91:1.39:1.44:1.62:1.07:1.71:1.22	15800000	38400000	31800000	45800000	56700000	51100000	0.35:0.84:0.70:1.00:1.24:1.12	28235	Exosome complex component MTR3 OS=Homo sapiens GN=EXOSC6 PE=1 SV=1
1871	877	Q9Y5Y2|NUBP2_HUMAN	56.68	14	3	3	Carbamidomethylation; Acetylation (N-term); Oxidation (M)	143000000	340000000	108000000	438000000	328000000	354000000	318000000	214000000	319000000	491000000	894000000	397000000	223000000	425000000	324000000	611000000	630000000	508000000	0.29:0.69:0.22:0.89:0.67:0.72:0.65:0.43:0.65:1.00:1.82:0.81:0.45:0.87:0.66:1.24:1.28:1.03	283000000	438000000	552000000	688000000	393000000	583000000	0.41:0.64:0.80:1.00:0.57:0.85	28825	Cytosolic Fe-S cluster assembly factor NUBP2 OS=Homo sapiens GN=NUBP2 PE=1 SV=1
1440	2036	P56211|ARP19_HUMAN	56.67	55	6	5	Acetylation (N-term); Deamidation (NQ); Oxidation (M); Pyro-glu from Q	437000000	521000000	349000000	588000000	797000000	421000000	520000000	774000000	429000000	662000000	1100000000	481000000	650000000	1130000000	741000000	429000000	823000000	270000000	0.66:0.79:0.53:0.89:1.20:0.64:0.79:1.17:0.65:1.00:1.67:0.73:0.98:1.71:1.12:0.65:1.24:0.41	438000000	604000000	575000000	749000000	848000000	507000000	0.58:0.81:0.77:1.00:1.13:0.68	12323	cAMP-regulated phosphoprotein 19 OS=Homo sapiens GN=ARPP19 PE=1 SV=2
1896	1245	Q9Y3E5|PTH2_HUMAN	56.6	32	4	4		671000000	596000000	538000000	601000000	817000000	391000000	878000000	784000000	785000000	883000000	1090000000	758000000	873000000	1140000000	640000000	1420000000	883000000	1180000000	0.76:0.67:0.61:0.68:0.93:0.44:0.99:0.89:0.89:1.00:1.23:0.86:0.99:1.29:0.72:1.61:1.00:1.33	602000000	603000000	816000000	910000000	884000000	1160000000	0.66:0.66:0.90:1.00:0.97:1.28	19194	Peptidyl-tRNA hydrolase 2 mitochondrial OS=Homo sapiens GN=PTRH2 PE=1 SV=1
2646	2383	P18615|NELFE_HUMAN	56.54	8	2	2		63700000	126000000	112000000	112000000	188000000	151000000	157000000	62700000	112000000	163000000	75400000	139000000	150000000	144000000	134000000	208000000	212000000	161000000	0.39:0.77:0.69:0.69:1.16:0.93:0.96:0.39:0.69:1.00:0.46:0.85:0.92:0.88:0.82:1.28:1.30:0.99	121000000	171000000	134000000	156000000	143000000	194000000	0.78:1.10:0.86:1.00:0.91:1.24	43240	Negative elongation factor E OS=Homo sapiens GN=NELFE PE=1 SV=3
203	115	P36776|LONM_HUMAN	56.47	27	21	21	Pyro-glu from Q; Pyro-glu from E; Acetylation (N-term); Deamidation (NQ); Carbamidomethylation	1410000000	4470000000	1200000000	5010000000	5170000000	3330000000	3240000000	4620000000	2680000000	5430000000	3990000000	2380000000	5070000000	4390000000	2390000000	4700000000	7050000000	1890000000	0.26:0.82:0.22:0.92:0.95:0.61:0.60:0.85:0.49:1.00:0.74:0.44:0.93:0.81:0.44:0.87:1.30:0.35	2390000000	4510000000	3590000000	3930000000	3950000000	4550000000	0.61:1.14:0.91:1.00:1.00:1.16	106489	Lon protease homolog mitochondrial OS=Homo sapiens GN=LONP1 PE=1 SV=2
62	207	Q9UQ35|SRRM2_HUMAN	56.45	17	31	30	Acetylation (N-term); Citrullination; Carbamidomethylation; Phosphorylation (STY); Deamidation (NQ); Pyro-glu from Q	1770000000	2640000000	1560000000	2890000000	3250000000	676000000	2530000000	2710000000	1110000000	2250000000	2750000000	1520000000	3610000000	2950000000	2020000000	4680000000	3890000000	2920000000	0.79:1.17:0.69:1.28:1.44:0.30:1.12:1.20:0.49:1.00:1.22:0.68:1.60:1.31:0.90:2.08:1.73:1.30	2050000000	2270000000	2120000000	2200000000	2860000000	3830000000	0.93:1.04:0.96:1.00:1.30:1.75	299616	Serine/arginine repetitive matrix protein 2 OS=Homo sapiens GN=SRRM2 PE=1 SV=2
1569	1173	Q9BWF3|RBM4_HUMAN	56.44	18	4	4	Acetylation (N-term); Phosphorylation (STY)	375000000	398000000	268000000	407000000	603000000	392000000	325000000	416000000	302000000	437000000	694000000	392000000	321000000	447000000	328000000	814000000	664000000	527000000	0.86:0.91:0.61:0.93:1.38:0.90:0.74:0.95:0.69:1.00:1.59:0.90:0.73:1.02:0.75:1.86:1.52:1.21	347000000	467000000	348000000	507000000	365000000	668000000	0.68:0.92:0.69:1.00:0.72:1.32	40314	RNA-binding protein 4 OS=Homo sapiens GN=RBM4 PE=1 SV=1
1577	2604	Q86Y56|DAAF5_HUMAN	56.41	6	3	3		147000000	169000000	106000000	198000000	225000000	171000000	190000000	255000000	157000000	217000000	217000000	176000000	236000000	204000000	170000000	341000000	283000000	188000000	0.68:0.78:0.49:0.91:1.04:0.79:0.87:1.17:0.72:1.00:1.00:0.81:1.09:0.94:0.78:1.57:1.30:0.87	141000000	198000000	201000000	204000000	204000000	310000000	0.69:0.97:0.99:1.00:1.00:1.52	93521	Dynein assembly factor 5 axonemal OS=Homo sapiens GN=DNAAF5 PE=1 SV=4
1725	1601	Q8N6M0|OTU6B_HUMAN	56.35	15	4	4	Carbamidomethylation	209000000	243000000	172000000	227000000	207000000	193000000	471000000	514000000	338000000	538000000	487000000	268000000	178000000	210000000	151000000	534000000	577000000	267000000	0.39:0.45:0.32:0.42:0.38:0.36:0.88:0.96:0.63:1.00:0.91:0.50:0.33:0.39:0.28:0.99:1.07:0.50	214000000	234000000	452000000	480000000	205000000	480000000	0.45:0.49:0.94:1.00:0.43:1.00	33813	OTU domain-containing protein 6B OS=Homo sapiens GN=OTUD6B PE=1 SV=1
1497	631	Q9Y606|TRUA_HUMAN	56.32	23	8	8	Phosphorylation (STY)	520000000	530000000	326000000	720000000	664000000	484000000	827000000	733000000	611000000	795000000	652000000	559000000	668000000	743000000	472000000	932000000	1120000000	597000000	0.65:0.67:0.41:0.91:0.84:0.61:1.04:0.92:0.77:1.00:0.82:0.70:0.84:0.93:0.59:1.17:1.41:0.75	501000000	631000000	724000000	669000000	628000000	883000000	0.75:0.94:1.08:1.00:0.94:1.32	47470	tRNA pseudouridine synthase A mitochondrial OS=Homo sapiens GN=PUS1 PE=1 SV=3
490	649	P35659|DEK_HUMAN	56.19	30	9	9	Carbamidomethylation; Acetylation (N-term); Oxidation (M); Deamidation (NQ); Phosphorylation (STY)	1590000000	1620000000	1310000000	2440000000	2470000000	2350000000	2930000000	2200000000	1780000000	1510000000	2770000000	1700000000	1670000000	2020000000	1410000000	2660000000	3730000000	2300000000	1.05:1.08:0.87:1.62:1.64:1.56:1.94:1.46:1.18:1.00:1.84:1.13:1.11:1.34:0.94:1.77:2.47:1.53	1530000000	2450000000	2330000000	2010000000	1700000000	2950000000	0.76:1.22:1.16:1.00:0.84:1.46	42674	Protein DEK OS=Homo sapiens GN=DEK PE=1 SV=1
824	879	P27635|RL10_HUMAN	56.15	19	4	3	Carbamidomethylation; Acetylation (N-term); Deamidation (NQ)	2410000000	2400000000	2290000000	3470000000	6070000000	3110000000	2510000000	2480000000	2300000000	3550000000	2950000000	2770000000	3560000000	3090000000	2660000000	4420000000	5860000000	3350000000	0.68:0.68:0.65:0.98:1.71:0.88:0.71:0.70:0.65:1.00:0.83:0.78:1.00:0.87:0.75:1.25:1.65:0.95	2370000000	4220000000	2600000000	3090000000	3100000000	4550000000	0.77:1.37:0.84:1.00:1.01:1.47	24604	60S ribosomal protein L10 OS=Homo sapiens GN=RPL10 PE=1 SV=4
999	1280	Q9BXW7|CECR5_HUMAN	56.06	23	6	6	Carbamidomethylation; Deamidation (NQ)	1030000000	839000000	720000000	1070000000	837000000	671000000	809000000	990000000	360000000	1200000000	1060000000	597000000	1100000000	894000000	516000000	553000000	380000000	416000000	0.86:0.70:0.60:0.89:0.70:0.56:0.68:0.83:0.30:1.00:0.89:0.50:0.92:0.75:0.43:0.46:0.32:0.35	864000000	858000000	795000000	951000000	837000000	462000000	0.91:0.90:0.84:1.00:0.88:0.49	46321	Cat eye syndrome critical region protein 5 OS=Homo sapiens GN=CECR5 PE=1 SV=1
1070	1670	Q7Z4V5|HDGR2_HUMAN	56.06	7	2	2	Phosphorylation (STY)	7700000	6480000	5050000	48000000	22800000	24700000	9690000	13100000	14700000	59800000	32800000	61100000	10700000	11300000	6660000	56200000	73100000	44200000	0.13:0.11:0.08:0.80:0.38:0.41:0.16:0.22:0.25:1.00:0.55:1.02:0.18:0.19:0.11:0.94:1.22:0.74	6410000	31800000	14200000	51200000	9540000	57800000	0.13:0.62:0.28:1.00:0.19:1.13	74317	Hepatoma-derived growth factor-related protein 2 OS=Homo sapiens GN=HDGFRP2 PE=1 SV=1
818	1028	Q9UKF6|CPSF3_HUMAN	55.66	17	8	8	Acetylation (N-term)	467000000	454000000	451000000	488000000	661000000	384000000	307000000	461000000	457000000	465000000	633000000	473000000	362000000	344000000	379000000	852000000	850000000	927000000	1.00:0.98:0.97:1.05:1.42:0.83:0.66:0.99:0.98:1.00:1.36:1.02:0.78:0.74:0.82:1.83:1.83:1.99	525000000	578000000	485000000	613000000	433000000	1120000000	0.86:0.94:0.79:1.00:0.71:1.83	77486	Cleavage and polyadenylation specificity factor subunit 3 OS=Homo sapiens GN=CPSF3 PE=1 SV=1
2573	2159	Q9Y6I4|UBP3_HUMAN	55.65	6	2	2	Carbamidomethylation; Acetylation (N-term)	120000000	143000000	103000000	178000000	79400000	111000000	167000000	201000000	115000000	113000000	160000000	102000000	128000000	140000000	139000000	343000000	261000000	322000000	1.07:1.27:0.91:1.58:0.70:0.99:1.48:1.79:1.02:1.00:1.42:0.91:1.14:1.25:1.23:3.04:2.32:2.86	122000000	123000000	161000000	125000000	136000000	309000000	0.98:0.98:1.29:1.00:1.09:2.47	58897	Ubiquitin carboxyl-terminal hydrolase 3 OS=Homo sapiens GN=USP3 PE=1 SV=2
685	704	P47756|CAPZB_HUMAN	55.6	41	11	11	Carbamidomethylation; Acetylation (N-term); Deamidation (NQ); Pyro-glu from Q	3410000000	3110000000	2030000000	3320000000	2620000000	2180000000	1690000000	2450000000	1590000000	2260000000	1990000000	1770000000	1290000000	1750000000	1430000000	2890000000	2610000000	1900000000	1.51:1.38:0.90:1.47:1.16:0.96:0.75:1.08:0.70:1.00:0.88:0.78:0.57:0.77:0.63:1.28:1.15:0.84	2880000000	2730000000	1930000000	2010000000	1710000000	2500000000	1.43:1.36:0.96:1.00:0.85:1.25	31350	F-actin-capping protein subunit beta OS=Homo sapiens GN=CAPZB PE=1 SV=4
1710	1466	Q8IVD9|NUDC3_HUMAN	55.45	17	4	4	Oxidation (M)	312000000	380000000	257000000	457000000	426000000	393000000	301000000	273000000	352000000	683000000	640000000	424000000	566000000	434000000	334000000	555000000	854000000	407000000	0.46:0.56:0.38:0.67:0.62:0.58:0.44:0.40:0.52:1.00:0.94:0.62:0.83:0.63:0.49:0.81:1.25:0.60	316000000	425000000	308000000	583000000	444000000	605000000	0.54:0.73:0.53:1.00:0.76:1.04	40822	NudC domain-containing protein 3 OS=Homo sapiens GN=NUDCD3 PE=1 SV=3
1341	974	Q13404|UB2V1_HUMAN	55.44	39	5	3	Carbamidomethylation; Deamidation (NQ)	319000000	310000000	466000000	903000000	378000000	820000000	631000000	454000000	769000000	1590000000	1280000000	1350000000	358000000	419000000	206000000	1310000000	1550000000	840000000	0.20:0.19:0.29:0.57:0.24:0.51:0.40:0.28:0.48:1.00:0.80:0.85:0.22:0.26:0.13:0.82:0.97:0.53	377000000	700000000	664000000	1410000000	403000000	1270000000	0.27:0.50:0.47:1.00:0.29:0.91	16495	Ubiquitin-conjugating enzyme E2 variant 1 OS=Homo sapiens GN=UBE2V1 PE=1 SV=2
1443	885	P55145|MANF_HUMAN	55.42	36	6	6	Carbamidomethylation; Pyro-glu from Q; Deamidation (NQ)	1550000000	1480000000	1230000000	1770000000	1720000000	1560000000	2670000000	2230000000	1760000000	1870000000	1420000000	1560000000	2290000000	2230000000	1560000000	2810000000	3130000000	2220000000	0.83:0.79:0.66:0.94:0.92:0.83:1.42:1.19:0.94:1.00:0.76:0.83:1.22:1.19:0.83:1.50:1.67:1.18	1470000000	1690000000	2220000000	1620000000	2020000000	2970000000	0.91:1.04:1.37:1.00:1.25:1.84	20700	Mesencephalic astrocyte-derived neurotrophic factor OS=Homo sapiens GN=MANF PE=1 SV=3
4915	10489	Q9BV68|RN126_HUMAN	55.38	11	2	2	Carbamidomethylation	204000000	231000000	142000000	234000000	229000000	175000000	196000000	354000000	96000000	289000000	313000000	218000000	274000000	334000000	248000000	381000000	389000000	337000000	0.71:0.80:0.49:0.81:0.79:0.61:0.68:1.23:0.33:1.00:1.08:0.75:0.95:1.16:0.86:1.32:1.35:1.17	193000000	213000000	261000000	273000000	286000000	369000000	0.71:0.78:0.96:1.00:1.05:1.35	35585	E3 ubiquitin-protein ligase RNF126 OS=Homo sapiens GN=RNF126 PE=1 SV=1
3798	10234	Q9C0B2|CFA74_HUMAN	55.35	1	1	1		858000000	379000000	849000000	1510000000	1590000000	1170000000	661000000	516000000	457000000	1000000000	659000000	498000000	1350000000	1130000000	760000000	1540000000	1620000000	820000000	0.86:0.38:0.85:1.51:1.59:1.17:0.66:0.52:0.46:1.00:0.66:0.50:1.35:1.13:0.76:1.54:1.62:0.82	695000000	1420000000	544000000	719000000	1080000000	1330000000	0.97:1.98:0.76:1.00:1.50:1.84	178588	Cilia- and flagella-associated protein 74 OS=Homo sapiens GN=CFAP74 PE=2 SV=3
2946	37008	P56715|RP1_HUMAN	55.27	1	2	1	Acetylation (N-term); Deamidation (NQ)	185000000	443000000	141000000	99500000	224000000	66200000	55900000	50100000	29800000	299000000	481000000	164000000	0	17500000	13500000	257000000	129000000	75700000	0.62:1.48:0.47:0.33:0.75:0.22:0.19:0.17:0.10:1.00:1.61:0.55:0:0.06:0.05:0.86:0.43:0.25	256000000	130000000	45300000	315000000	15500000	154000000	0.81:0.41:0.14:1.00:0.05:0.49	240659	Oxygen-regulated protein 1 OS=Homo sapiens GN=RP1 PE=1 SV=1
1689	7210	P49750|YLPM1_HUMAN	55.08	5	5	4		183000000	232000000	168000000	249000000	329000000	221000000	197000000	269000000	197000000	230000000	424000000	215000000	192000000	196000000	164000000	335000000	478000000	300000000	0.80:1.01:0.73:1.08:1.43:0.96:0.85:1.17:0.86:1.00:1.84:0.94:0.83:0.85:0.71:1.45:2.08:1.30	194000000	266000000	221000000	290000000	184000000	371000000	0.67:0.92:0.76:1.00:0.63:1.28	219983	YLP motif-containing protein 1 OS=Homo sapiens GN=YLPM1 PE=1 SV=3
318	288	Q04917|1433F_HUMAN	54.94	36	7	5	Carbamidomethylation; Acetylation (N-term); Deamidation (NQ); Pyro-glu from Q	1900000000	1920000000	1810000000	2860000000	3670000000	2680000000	3500000000	2610000000	3080000000	2430000000	2110000000	2680000000	2150000000	3440000000	2370000000	4710000000	3020000000	3020000000	0.78:0.79:0.75:1.18:1.51:1.10:1.44:1.08:1.27:1.00:0.87:1.10:0.89:1.42:0.98:1.94:1.24:1.24	1880000000	3070000000	3060000000	2410000000	2650000000	3590000000	0.78:1.28:1.27:1.00:1.10:1.49	28219	14-3-3 protein eta OS=Homo sapiens GN=YWHAH PE=1 SV=4
1811	1715	P80217|IN35_HUMAN	54.92	30	8	8	Acetylation (N-term); Carbamidomethylation; Oxidation (M)	616000000	652000000	287000000	901000000	928000000	544000000	447000000	479000000	318000000	516000000	569000000	401000000	331000000	368000000	272000000	852000000	622000000	537000000	1.19:1.26:0.56:1.75:1.80:1.05:0.87:0.93:0.62:1.00:1.10:0.78:0.64:0.71:0.53:1.65:1.21:1.04	619000000	791000000	415000000	495000000	328000000	692000000	1.25:1.60:0.84:1.00:0.66:1.40	31546	Interferon-induced 35 kDa protein OS=Homo sapiens GN=IFI35 PE=1 SV=5
332	811	P49257|LMAN1_HUMAN	54.84	25	10	10	Oxidation (HW); Deamidation (NQ); Phosphorylation (STY); Acetylation (N-term); Pyro-glu from Q	1360000000	1750000000	1040000000	2060000000	1750000000	2080000000	1420000000	2260000000	1430000000	2440000000	2510000000	1940000000	2070000000	1820000000	1850000000	2390000000	3710000000	1810000000	0.56:0.72:0.42:0.84:0.71:0.85:0.58:0.93:0.59:1.00:1.03:0.80:0.85:0.74:0.76:0.98:1.52:0.74	1380000000	1960000000	1700000000	2300000000	1910000000	2640000000	0.60:0.85:0.74:1.00:0.83:1.15	57549	Protein ERGIC-53 OS=Homo sapiens GN=LMAN1 PE=1 SV=2
554	459	O43242|PSMD3_HUMAN	54.71	27	11	11	Acetylation (N-term); Deamidation (NQ)	859000000	831000000	758000000	1070000000	1380000000	1130000000	821000000	875000000	786000000	1680000000	1620000000	1260000000	1410000000	1170000000	853000000	1560000000	1850000000	1250000000	0.51:0.50:0.45:0.64:0.82:0.67:0.49:0.52:0.47:1.00:0.96:0.75:0.84:0.70:0.51:0.93:1.10:0.75	816000000	1190000000	836000000	1520000000	1140000000	1550000000	0.54:0.78:0.55:1.00:0.75:1.02	60978	26S proteasome non-ATPase regulatory subunit 3 OS=Homo sapiens GN=PSMD3 PE=1 SV=2
4082	2854	Q9Y3B4|SF3B6_HUMAN	54.48	21	2	2	Carbamidomethylation	557000000	404000000	582000000	473000000	572000000	380000000	769000000	752000000	740000000	787000000	519000000	443000000	794000000	693000000	552000000	1100000000	1080000000	756000000	0.71:0.51:0.74:0.60:0.73:0.48:0.98:0.96:0.94:1.00:0.66:0.56:1.01:0.88:0.70:1.40:1.37:0.96	590000000	487000000	754000000	583000000	680000000	978000000	1.01:0.84:1.29:1.00:1.17:1.68	14585	Splicing factor 3B subunit 6 OS=Homo sapiens GN=SF3B6 PE=1 SV=1
2187	1830	P50440|GATM_HUMAN	54.46	9	2	2	Carbamidomethylation	238000000	200000000	212000000	280000000	272000000	303000000	172000000	169000000	109000000	195000000	199000000	204000000	159000000	142000000	157000000	328000000	234000000	311000000	1.22:1.02:1.09:1.43:1.39:1.55:0.88:0.86:0.56:1.00:1.02:1.04:0.82:0.73:0.80:1.68:1.20:1.59	234000000	285000000	167000000	199000000	160000000	291000000	1.17:1.43:0.84:1.00:0.80:1.46	48455	Glycine amidinotransferase mitochondrial OS=Homo sapiens GN=GATM PE=1 SV=1
555	858	O15143|ARC1B_HUMAN	54.42	27	7	7	Carbamidomethylation; Acetylation (N-term); Deamidation (NQ)	1200000000	948000000	968000000	955000000	1610000000	544000000	459000000	967000000	620000000	1280000000	1920000000	568000000	421000000	1090000000	509000000	2300000000	2300000000	1320000000	0.93:0.74:0.75:0.74:1.25:0.42:0.36:0.75:0.48:1.00:1.50:0.44:0.33:0.85:0.40:1.79:1.79:1.03	1040000000	1130000000	682000000	1260000000	727000000	2030000000	0.82:0.90:0.54:1.00:0.58:1.61	40950	Actin-related protein 2/3 complex subunit 1B OS=Homo sapiens GN=ARPC1B PE=1 SV=3
131	79	P56192|SYMC_HUMAN	54.33	30	19	19	Carbamidomethylation; Acetylation (N-term); Deamidation (NQ); Pyro-glu from Q	1640000000	1790000000	1870000000	2110000000	2620000000	2290000000	2520000000	2680000000	2300000000	2780000000	2480000000	2260000000	2450000000	3020000000	2550000000	3880000000	2900000000	3270000000	0.59:0.64:0.67:0.76:0.94:0.82:0.90:0.96:0.83:1.00:0.89:0.81:0.88:1.08:0.92:1.40:1.04:1.18	1760000000	2340000000	2500000000	2500000000	2670000000	3350000000	0.70:0.93:1.00:1.00:1.07:1.34	101116	Methionine--tRNA ligase cytoplasmic OS=Homo sapiens GN=MARS PE=1 SV=2
917	474	P61088|UBE2N_HUMAN	54.26	52	9	8	Carbamidomethylation; Acetylation (N-term); Deamidation (NQ); Oxidation (M)	285000000	324000000	695000000	641000000	398000000	438000000	1490000000	990000000	1880000000	1770000000	1280000000	1690000000	1750000000	2220000000	242000000	2230000000	2450000000	2030000000	0.16:0.18:0.39:0.36:0.23:0.25:0.84:0.56:1.06:1.00:0.72:0.95:0.99:1.26:0.14:1.26:1.39:1.15	446000000	492000000	1470000000	1580000000	1940000000	2250000000	0.28:0.31:0.93:1.00:1.23:1.43	17138	Ubiquitin-conjugating enzyme E2 N OS=Homo sapiens GN=UBE2N PE=1 SV=1
1881	2837	Q9UKD2|MRT4_HUMAN	54.26	26	5	5	Carbamidomethylation; Pyro-glu from Q	215000000	114000000	179000000	246000000	207000000	204000000	303000000	333000000	248000000	368000000	367000000	295000000	361000000	348000000	255000000	324000000	193000000	146000000	0.58:0.31:0.49:0.67:0.56:0.56:0.83:0.90:0.67:1.00:1.00:0.80:0.98:0.95:0.69:0.88:0.52:0.40	204000000	219000000	295000000	343000000	321000000	324000000	0.60:0.64:0.86:1.00:0.94:0.94	27560	mRNA turnover protein 4 homolog OS=Homo sapiens GN=MRTO4 PE=1 SV=2
377	478	Q8WWM7|ATX2L_HUMAN	54.22	20	12	12	Acetylation (N-term); Deamidation (NQ); Citrullination; Carbamidomethylation; Phosphorylation (STY)	555000000	930000000	299000000	1390000000	1050000000	1040000000	395000000	1310000000	973000000	2550000000	1170000000	1740000000	1740000000	1320000000	330000000	451000000	663000000	1080000000	0.22:0.36:0.12:0.55:0.41:0.41:0.15:0.51:0.38:1.00:0.46:0.68:0.68:0.52:0.13:0.18:0.26:0.42	700000000	1250000000	1230000000	1840000000	1410000000	1230000000	0.38:0.68:0.67:1.00:0.77:0.67	113374	Ataxin-2-like protein OS=Homo sapiens GN=ATXN2L PE=1 SV=2
612	706	Q15306|IRF4_HUMAN	54.17	29	11	11	Pyro-glu from Q; Carbamidomethylation; Acetylation (N-term); Deamidation (NQ)	1050000000	835000000	651000000	1310000000	1530000000	935000000	635000000	834000000	517000000	842000000	1250000000	501000000	546000000	843000000	368000000	1460000000	1040000000	741000000	1.25:0.99:0.77:1.55:1.81:1.11:0.75:0.99:0.61:1.00:1.48:0.60:0.65:1.00:0.44:1.74:1.24:0.88	845000000	1260000000	672000000	864000000	608000000	1170000000	0.98:1.45:0.78:1.00:0.70:1.35	51773	Interferon regulatory factor 4 OS=Homo sapiens GN=IRF4 PE=1 SV=1
1197	691	Q96P70|IPO9_HUMAN	54.14	8	7	7	Acetylation (N-term)	683000000	307000000	481000000	588000000	810000000	571000000	746000000	873000000	363000000	773000000	347000000	312000000	392000000	308000000	345000000	1070000000	742000000	770000000	0.88:0.40:0.62:0.76:1.05:0.74:0.97:1.13:0.47:1.00:0.45:0.40:0.51:0.40:0.45:1.39:0.96:1.00	583000000	657000000	774000000	778000000	377000000	924000000	0.75:0.84:1.00:1.00:0.49:1.19	115963	Importin-9 OS=Homo sapiens GN=IPO9 PE=1 SV=3
2488	2675	Q9UKN8|TF3C4_HUMAN	54.13	4	3	3	Pyro-glu from Q; Carbamidomethylation	217000000	234000000	154000000	102000000	162000000	82600000	104000000	158000000	98700000	182000000	172000000	111000000	125000000	121000000	72800000	329000000	310000000	81400000	1.20:1.29:0.85:0.56:0.89:0.45:0.57:0.87:0.54:1.00:0.95:0.61:0.69:0.67:0.40:1.81:1.71:0.45	202000000	115000000	120000000	155000000	106000000	315000000	1.30:0.74:0.77:1.00:0.69:2.03	91982	General transcription factor 3C polypeptide 4 OS=Homo sapiens GN=GTF3C4 PE=1 SV=2
5593	3450	O75935|DCTN3_HUMAN	54.12	10	2	2	Acetylation (N-term)	142000000	201000000	33300000	72300000	20800000	14200000	131000000	79900000	70500000	108000000	150000000	31500000	25000000	92800000	20800000	121000000	60100000	18700000	1.32:1.87:0.31:0.67:0.19:0.13:1.22:0.74:0.66:1.00:1.40:0.29:0.23:0.86:0.19:1.12:0.56:0.17	126000000	43500000	101000000	96500000	59500000	119000000	1.30:0.45:1.04:1.00:0.62:1.24	21119	Dynactin subunit 3 OS=Homo sapiens GN=DCTN3 PE=1 SV=1
552	1778	P98175|RBM10_HUMAN	53.98	6	3	3	Phosphorylation (STY)	179000000	161000000	121000000	50400000	68300000	38700000	271000000	304000000	239000000	134000000	101000000	237000000	326000000	268000000	244000000	324000000	343000000	328000000	1.33:1.20:0.90:0.38:0.51:0.29:2.01:2.26:1.77:1.00:0.75:1.77:2.43:1.99:1.82:2.41:2.55:2.44	171000000	52500000	271000000	247000000	279000000	332000000	0.69:0.21:1.10:1.00:1.13:1.34	103533	RNA-binding protein 10 OS=Homo sapiens GN=RBM10 PE=1 SV=3
763	360	O95336|6PGL_HUMAN	53.97	53	9	9	Acetylation (N-term); Carbamidomethylation; Deamidation (NQ)	1010000000	1130000000	964000000	1310000000	1580000000	1170000000	738000000	1070000000	890000000	996000000	1330000000	949000000	1040000000	1330000000	591000000	2270000000	1920000000	1680000000	1.01:1.13:0.97:1.31:1.58:1.18:0.74:1.07:0.89:1.00:1.34:0.95:1.05:1.33:0.59:2.28:1.92:1.69	1030000000	1350000000	1080000000	1090000000	987000000	1960000000	0.94:1.24:0.99:1.00:0.90:1.79	27547	6-phosphogluconolactonase OS=Homo sapiens GN=PGLS PE=1 SV=2
506	370	P15170|ERF3A_HUMAN	53.94	20	8	5	Carbamidomethylation; Acetylation (N-term); Deamidation (NQ); Phosphorylation (STY)	494000000	574000000	250000000	1010000000	568000000	926000000	583000000	741000000	498000000	901000000	789000000	631000000	815000000	615000000	480000000	831000000	1030000000	638000000	0.55:0.64:0.28:1.12:0.63:1.03:0.65:0.82:0.55:1.00:0.88:0.70:0.90:0.68:0.53:0.92:1.14:0.71	439000000	835000000	607000000	774000000	637000000	832000000	0.57:1.08:0.78:1.00:0.82:1.08	55756	Eukaryotic peptide chain release factor GTP-binding subunit ERF3A OS=Homo sapiens GN=GSPT1 PE=1 SV=1
1095	22879	Q6P1N0|C2D1A_HUMAN	53.9	4	3	3	Acetylation (N-term)	62300000	73600000	51000000	74700000	65100000	48400000	129000000	130000000	89200000	110000000	136000000	76300000	100000000	94300000	66400000	115000000	167000000	71700000	0.57:0.67:0.46:0.68:0.59:0.44:1.17:1.18:0.81:1.00:1.23:0.69:0.91:0.86:0.60:1.05:1.52:0.65	62300000	64000000	116000000	107000000	87000000	118000000	0.58:0.60:1.08:1.00:0.81:1.10	104062	Coiled-coil and C2 domain-containing protein 1A OS=Homo sapiens GN=CC2D1A PE=1 SV=1
5806	42366	P60002|ELOF1_HUMAN	53.87	22	1	1	Carbamidomethylation	180000000	176000000	126000000	183000000	248000000	152000000	121000000	222000000	129000000	176000000	212000000	145000000	183000000	238000000	156000000	324000000	334000000	255000000	1.02:1.00:0.72:1.04:1.41:0.86:0.69:1.26:0.74:1.00:1.20:0.82:1.04:1.35:0.89:1.84:1.90:1.45	161000000	194000000	157000000	178000000	193000000	304000000	0.90:1.09:0.89:1.00:1.08:1.71	9462	Transcription elongation factor 1 homolog OS=Homo sapiens GN=ELOF1 PE=3 SV=1
345	384	P29692|EF1D_HUMAN	53.84	41	11	9	Acetylation (N-term); Deamidation (NQ); Pyro-glu from Q; Citrullination; Phosphorylation (STY); Carbamidomethylation	3760000000	4200000000	3080000000	6950000000	4930000000	5410000000	3470000000	3840000000	1820000000	5820000000	6620000000	5460000000	3080000000	3280000000	2610000000	7020000000	7320000000	4210000000	0.64:0.72:0.53:1.19:0.85:0.93:0.60:0.66:0.31:1.00:1.14:0.94:0.53:0.56:0.45:1.21:1.26:0.72	3680000000	6460000000	3140000000	5970000000	3030000000	6180000000	0.62:1.08:0.53:1.00:0.51:1.04	31122	Elongation factor 1-delta OS=Homo sapiens GN=EEF1D PE=1 SV=5
1168	1170	P36957|ODO2_HUMAN	53.62	16	6	5	Deamidation (NQ)	1580000000	1490000000	1060000000	2010000000	1400000000	1760000000	1580000000	1390000000	1580000000	1640000000	2390000000	1550000000	1310000000	2210000000	1150000000	2850000000	2490000000	2440000000	0.96:0.90:0.64:1.22:0.85:1.07:0.96:0.85:0.96:1.00:1.45:0.94:0.80:1.35:0.70:1.74:1.52:1.48	1370000000	1800000000	1520000000	2040000000	1960000000	2590000000	0.67:0.89:0.74:1.00:0.96:1.27	48755	Dihydrolipoyllysine-residue succinyltransferase component of 2-oxoglutarate dehydrogenase complex mitochondrial OS=Homo sapiens GN=DLST PE=1 SV=4
633	542	Q92556|ELMO1_HUMAN	53.57	11	5	4	Carbamidomethylation; Phosphorylation (STY); Acetylation (N-term); Deamidation (NQ)	749000000	799000000	515000000	867000000	1140000000	956000000	913000000	1210000000	810000000	1260000000	1260000000	1100000000	995000000	805000000	771000000	1310000000	1460000000	1120000000	0.59:0.63:0.41:0.69:0.90:0.76:0.72:0.96:0.64:1.00:1.00:0.87:0.79:0.64:0.61:1.04:1.16:0.89	688000000	988000000	978000000	1210000000	857000000	1300000000	0.57:0.82:0.81:1.00:0.71:1.08	83829	Engulfment and cell motility protein 1 OS=Homo sapiens GN=ELMO1 PE=1 SV=2
711	461	P31153|METK2_HUMAN	53.48	35	9	8	Carbamidomethylation; Acetylation (N-term); Deamidation (NQ)	3020000000	2800000000	3080000000	3420000000	4180000000	3120000000	2410000000	3440000000	2910000000	3340000000	3430000000	3190000000	3870000000	3840000000	3450000000	5860000000	6920000000	4030000000	0.91:0.84:0.92:1.02:1.25:0.93:0.72:1.03:0.87:1.00:1.03:0.95:1.16:1.15:1.03:1.76:2.07:1.21	3190000000	3640000000	2990000000	3370000000	3740000000	5660000000	0.95:1.08:0.89:1.00:1.11:1.68	43661	S-adenosylmethionine synthase isoform type-2 OS=Homo sapiens GN=MAT2A PE=1 SV=1
356	178	Q96RU3|FNBP1_HUMAN	53.36	23	10	10	Carbamidomethylation; Pyro-glu from Q; Acetylation (N-term); Deamidation (NQ)	2360000000	2570000000	2020000000	2190000000	3290000000	2170000000	2530000000	2560000000	2000000000	3280000000	2960000000	2230000000	3540000000	3170000000	2580000000	4720000000	4970000000	3420000000	0.72:0.78:0.62:0.67:1.00:0.66:0.77:0.78:0.61:1.00:0.90:0.68:1.08:0.97:0.79:1.44:1.52:1.04	2310000000	2700000000	2360000000	2840000000	3100000000	4370000000	0.81:0.95:0.83:1.00:1.09:1.54	71307	Formin-binding protein 1 OS=Homo sapiens GN=FNBP1 PE=1 SV=2
873	1371	Q9Y2D5|AKAP2_HUMAN	53.36	11	6	6	Phosphorylation (STY); Carbamidomethylation	356000000	284000000	216000000	383000000	356000000	262000000	157000000	325000000	185000000	269000000	386000000	226000000	281000000	399000000	230000000	552000000	722000000	343000000	1.33:1.06:0.80:1.42:1.33:0.97:0.58:1.21:0.69:1.00:1.44:0.84:1.05:1.49:0.86:2.05:2.69:1.28	286000000	334000000	223000000	294000000	304000000	539000000	0.97:1.14:0.76:1.00:1.03:1.84	94661	A-kinase anchor protein 2 OS=Homo sapiens GN=AKAP2 PE=1 SV=3
2033	2096	Q96SB4|SRPK1_HUMAN	53.22	12	5	4	Carbamidomethylation; Deamidation (NQ)	158000000	163000000	134000000	412000000	276000000	198000000	371000000	191000000	164000000	381000000	226000000	310000000	283000000	224000000	147000000	279000000	377000000	202000000	0.42:0.43:0.35:1.08:0.72:0.52:0.97:0.50:0.43:1.00:0.59:0.81:0.74:0.59:0.38:0.73:0.99:0.53	152000000	295000000	242000000	306000000	218000000	286000000	0.50:0.97:0.79:1.00:0.71:0.94	74325	SRSF protein kinase 1 OS=Homo sapiens GN=SRPK1 PE=1 SV=2
4808	52581	Q6DD87|ZN787_HUMAN	53.16	7	2	2	Carbamidomethylation	37800000	24600000	62600000	81200000	153000000	53900000	38500000	39600000	73600000	154000000	160000000	101000000	68300000	109000000	48400000	239000000	155000000	151000000	0.25:0.16:0.41:0.53:1.00:0.35:0.25:0.26:0.48:1.00:1.04:0.66:0.44:0.71:0.31:1.56:1.01:0.98	47900000	96100000	50600000	138000000	75300000	182000000	0.35:0.70:0.37:1.00:0.54:1.32	40543	Zinc finger protein 787 OS=Homo sapiens GN=ZNF787 PE=1 SV=3
1369	1238	Q8TAT6|NPL4_HUMAN	53.11	8	4	4	Acetylation (N-term)	345000000	356000000	311000000	469000000	399000000	552000000	434000000	318000000	435000000	313000000	323000000	305000000	373000000	374000000	391000000	725000000	606000000	577000000	1.10:1.14:0.99:1.50:1.27:1.76:1.38:1.02:1.39:1.00:1.03:0.97:1.19:1.19:1.25:2.31:1.93:1.84	396000000	510000000	406000000	314000000	397000000	636000000	1.26:1.63:1.29:1.00:1.27:2.03	68120	Nuclear protein localization protein 4 homolog OS=Homo sapiens GN=NPLOC4 PE=1 SV=3
503	1010	P51659|DHB4_HUMAN	53.01	18	8	8	Deamidation (NQ); Carbamidomethylation	294000000	436000000	545000000	493000000	425000000	493000000	560000000	385000000	519000000	590000000	392000000	569000000	549000000	558000000	489000000	816000000	888000000	697000000	0.50:0.74:0.92:0.84:0.72:0.84:0.95:0.65:0.88:1.00:0.66:0.96:0.93:0.94:0.83:1.38:1.51:1.18	454000000	470000000	507000000	517000000	532000000	800000000	0.88:0.91:0.98:1.00:1.03:1.55	79686	Peroxisomal multifunctional enzyme type 2 OS=Homo sapiens GN=HSD17B4 PE=1 SV=3
1598	1302	Q92544|TM9S4_HUMAN	52.86	10	4	4	Carbamidomethylation	352000000	471000000	328000000	516000000	608000000	403000000	407000000	243000000	254000000	555000000	797000000	385000000	411000000	532000000	257000000	830000000	715000000	621000000	0.63:0.85:0.59:0.93:1.10:0.73:0.73:0.44:0.46:1.00:1.43:0.69:0.74:0.96:0.46:1.49:1.29:1.12	384000000	509000000	319000000	579000000	400000000	722000000	0.66:0.88:0.55:1.00:0.69:1.25	74519	Transmembrane 9 superfamily member 4 OS=Homo sapiens GN=TM9SF4 PE=1 SV=2
1797	1242	O00764|PDXK_HUMAN	52.75	21	4	4		793000000	730000000	550000000	660000000	1050000000	864000000	1230000000	1100000000	758000000	378000000	846000000	736000000	870000000	958000000	669000000	1640000000	791000000	1470000000	2.10:1.93:1.46:1.75:2.78:2.29:3.24:2.92:2.01:1.00:2.24:1.95:2.30:2.54:1.77:4.34:2.09:3.89	691000000	858000000	1030000000	770000000	832000000	1480000000	0.90:1.11:1.34:1.00:1.08:1.92	35102	Pyridoxal kinase OS=Homo sapiens GN=PDXK PE=1 SV=1
1840	2083	Q9BYD6|RM01_HUMAN	52.75	14	3	3		133000000	226000000	171000000	223000000	168000000	221000000	222000000	268000000	168000000	158000000	166000000	143000000	190000000	214000000	211000000	332000000	305000000	359000000	0.84:1.43:1.08:1.41:1.06:1.39:1.40:1.70:1.06:1.00:1.05:0.90:1.20:1.35:1.33:2.10:1.93:2.27	197000000	204000000	219000000	172000000	205000000	332000000	1.15:1.19:1.28:1.00:1.19:1.93	36909	39S ribosomal protein L1 mitochondrial OS=Homo sapiens GN=MRPL1 PE=1 SV=2
869	2348	Q6NZY4|ZCHC8_HUMAN	52.74	8	3	3	Carbamidomethylation	143000000	144000000	96100000	206000000	244000000	173000000	66800000	198000000	158000000	191000000	232000000	143000000	134000000	206000000	138000000	255000000	224000000	240000000	0.75:0.75:0.50:1.08:1.28:0.90:0.35:1.04:0.83:1.00:1.21:0.75:0.70:1.08:0.72:1.33:1.17:1.25	127000000	207000000	163000000	189000000	159000000	240000000	0.68:1.10:0.87:1.00:0.84:1.27	78577	Zinc finger CCHC domain-containing protein 8 OS=Homo sapiens GN=ZCCHC8 PE=1 SV=2
492	291	P45880|VDAC2_HUMAN	52.67	31	10	7	Carbamidomethylation; Acetylation (N-term); Deamidation (NQ)	3300000000	3270000000	2120000000	3390000000	3730000000	2650000000	2870000000	2260000000	2240000000	4880000000	4080000000	3290000000	2790000000	2680000000	1880000000	6390000000	6350000000	3580000000	0.68:0.67:0.43:0.70:0.77:0.54:0.59:0.46:0.46:1.00:0.84:0.67:0.57:0.55:0.38:1.31:1.30:0.73	2990000000	3260000000	3590000000	4080000000	2450000000	5870000000	0.73:0.80:0.88:1.00:0.60:1.44	31567	Voltage-dependent anion-selective channel protein 2 OS=Homo sapiens GN=VDAC2 PE=1 SV=2
625	795	P29590|PML_HUMAN	52.47	14	9	9	Carbamidomethylation; Acetylation (N-term); Deamidation (NQ); Phosphorylation (STY); Pyro-glu from Q	271000000	262000000	194000000	436000000	379000000	304000000	204000000	226000000	242000000	492000000	450000000	379000000	354000000	331000000	229000000	509000000	529000000	326000000	0.55:0.53:0.39:0.89:0.77:0.62:0.41:0.46:0.49:1.00:0.92:0.77:0.72:0.67:0.47:1.04:1.07:0.66	261000000	373000000	224000000	440000000	305000000	455000000	0.59:0.85:0.51:1.00:0.69:1.03	97551	Protein PML OS=Homo sapiens GN=PML PE=1 SV=3
1751	1761	Q9H993|ARMT1_HUMAN	52.47	7	2	2		291000000	332000000	267000000	351000000	431000000	259000000	205000000	426000000	252000000	299000000	456000000	230000000	328000000	583000000	300000000	663000000	516000000	492000000	0.97:1.11:0.89:1.17:1.44:0.87:0.69:1.43:0.84:1.00:1.53:0.77:1.10:1.95:1.00:2.22:1.72:1.64	297000000	347000000	295000000	329000000	404000000	557000000	0.90:1.06:0.90:1.00:1.23:1.69	51172	Protein-glutamate O-methyltransferase OS=Homo sapiens GN=ARMT1 PE=1 SV=1
1098	959	P00390|GSHR_HUMAN	52.3	12	4	4	Carbamidomethylation	1270000000	1050000000	1060000000	1600000000	1330000000	1190000000	628000000	1090000000	481000000	1380000000	1390000000	1010000000	1300000000	1190000000	1050000000	1970000000	1920000000	1220000000	0.92:0.76:0.76:1.16:0.97:0.86:0.45:0.79:0.35:1.00:1.01:0.73:0.94:0.86:0.76:1.43:1.39:0.88	1120000000	1380000000	757000000	1260000000	1180000000	1710000000	0.89:1.09:0.60:1.00:0.94:1.35	56257	Glutathione reductase mitochondrial OS=Homo sapiens GN=GSR PE=1 SV=2
780	333	P46060|RAGP1_HUMAN	52.29	15	7	7	Carbamidomethylation; Deamidation (NQ)	529000000	611000000	572000000	256000000	519000000	220000000	399000000	656000000	595000000	512000000	473000000	509000000	703000000	597000000	539000000	1170000000	1210000000	830000000	1.03:1.19:1.12:0.50:1.01:0.43:0.78:1.28:1.16:1.00:0.92:0.99:1.37:1.17:1.05:2.28:2.37:1.62	571000000	352000000	550000000	498000000	613000000	1070000000	1.15:0.71:1.10:1.00:1.23:2.15	63542	Ran GTPase-activating protein 1 OS=Homo sapiens GN=RANGAP1 PE=1 SV=1
257	96	P14868|SYDC_HUMAN	52.16	50	23	23	Carbamidomethylation; Acetylation (N-term); Pyro-glu from Q; Deamidation (NQ); Oxidation (M); Phosphorylation (STY)	3220000000	3840000000	3330000000	4290000000	6030000000	2510000000	3480000000	3910000000	3110000000	3380000000	4930000000	2840000000	3020000000	3730000000	3020000000	7750000000	7210000000	4500000000	0.95:1.13:0.98:1.27:1.78:0.74:1.03:1.16:0.92:1.00:1.46:0.84:0.89:1.10:0.89:2.29:2.13:1.33	3470000000	4270000000	3500000000	3720000000	3260000000	6530000000	0.93:1.15:0.94:1.00:0.88:1.76	57136	Aspartate--tRNA ligase cytoplasmic OS=Homo sapiens GN=DARS PE=1 SV=2
754	1225	Q13155|AIMP2_HUMAN	52.14	35	8	8	Carbamidomethylation; Deamidation (NQ); Acetylation (N-term); Phosphorylation (STY)	458000000	379000000	579000000	1040000000	913000000	712000000	728000000	588000000	678000000	1020000000	1110000000	904000000	683000000	785000000	415000000	1020000000	1020000000	610000000	0.45:0.37:0.56:1.01:0.89:0.69:0.71:0.57:0.66:1.00:1.08:0.88:0.67:0.77:0.41:0.99:1.00:0.60	512000000	888000000	664000000	1010000000	694000000	951000000	0.51:0.88:0.66:1.00:0.68:0.94	35349	Aminoacyl tRNA synthase complex-interacting multifunctional protein 2 OS=Homo sapiens GN=AIMP2 PE=1 SV=2
1879	1753	Q9H974|QTRD1_HUMAN	52.08	26	6	6	Carbamidomethylation; Acetylation (N-term); Phosphorylation (STY)	334000000	370000000	273000000	395000000	453000000	250000000	162000000	247000000	178000000	288000000	370000000	196000000	312000000	371000000	259000000	483000000	526000000	220000000	1.16:1.28:0.95:1.37:1.57:0.87:0.56:0.86:0.62:1.00:1.28:0.68:1.08:1.29:0.90:1.67:1.82:0.76	326000000	366000000	196000000	285000000	314000000	443000000	1.14:1.29:0.69:1.00:1.10:1.56	46713	Queuine tRNA-ribosyltransferase subunit QTRTD1 OS=Homo sapiens GN=QTRTD1 PE=1 SV=1
141	177	P05388|RLA0_HUMAN	51.92	47	19	8	Carbamidomethylation; Acetylation (N-term); Deamidation (NQ); Phosphorylation (STY); Oxidation (M)	3690000000	1830000000	4610000000	2260000000	1840000000	3030000000	4490000000	3160000000	5720000000	3760000000	4220000000	5950000000	3610000000	5190000000	6180000000	4110000000	5700000000	6410000000	0.98:0.49:1.23:0.60:0.49:0.80:1.19:0.84:1.52:1.00:1.12:1.58:0.96:1.38:1.64:1.09:1.51:1.70	4370000000	2990000000	5220000000	6520000000	6160000000	7130000000	0.67:0.46:0.80:1.00:0.95:1.09	34274	60S acidic ribosomal protein P0 OS=Homo sapiens GN=RPLP0 PE=1 SV=1
618	995	P40222|TXLNA_HUMAN	51.9	23	5	5	Carbamidomethylation; Acetylation (N-term); Deamidation (NQ)	787000000	903000000	621000000	1240000000	958000000	1260000000	882000000	1010000000	561000000	1150000000	1420000000	745000000	1610000000	1280000000	1430000000	1110000000	1700000000	771000000	0.69:0.79:0.54:1.08:0.84:1.10:0.77:0.88:0.49:1.00:1.24:0.65:1.40:1.11:1.25:0.97:1.48:0.67	770000000	1150000000	818000000	1350000000	1630000000	1210000000	0.57:0.85:0.61:1.00:1.21:0.90	61891	Alpha-taxilin OS=Homo sapiens GN=TXLNA PE=1 SV=3
992	869	Q04323|UBXN1_HUMAN	51.81	31	5	5	Acetylation (N-term); Deamidation (NQ)	653000000	657000000	556000000	1050000000	1090000000	964000000	1140000000	1090000000	852000000	1260000000	1330000000	1100000000	809000000	1010000000	811000000	1060000000	1500000000	928000000	0.52:0.52:0.44:0.83:0.86:0.76:0.90:0.87:0.68:1.00:1.05:0.87:0.64:0.80:0.64:0.84:1.19:0.74	622000000	1040000000	1030000000	1230000000	879000000	1160000000	0.51:0.84:0.83:1.00:0.71:0.94	33325	UBX domain-containing protein 1 OS=Homo sapiens GN=UBXN1 PE=1 SV=2
3741	1718	Q96EY4|TMA16_HUMAN	51.8	17	2	2		367000000	373000000	221000000	439000000	387000000	423000000	457000000	513000000	431000000	424000000	341000000	398000000	531000000	464000000	409000000	518000000	685000000	590000000	0.86:0.88:0.52:1.04:0.91:1.00:1.08:1.21:1.02:1.00:0.80:0.94:1.25:1.09:0.97:1.22:1.62:1.39	320000000	416000000	467000000	388000000	468000000	598000000	0.83:1.07:1.20:1.00:1.21:1.54	23864	Translation machinery-associated protein 16 OS=Homo sapiens GN=TMA16 PE=1 SV=2
1148	2388	O60449|LY75_HUMAN	51.79	6	8	8	Carbamidomethylation	276000000	317000000	265000000	339000000	439000000	256000000	418000000	474000000	394000000	447000000	340000000	370000000	533000000	468000000	392000000	552000000	555000000	496000000	0.62:0.71:0.59:0.76:0.98:0.57:0.93:1.06:0.88:1.00:0.76:0.83:1.19:1.05:0.88:1.23:1.24:1.11	286000000	344000000	428000000	386000000	464000000	534000000	0.74:0.89:1.11:1.00:1.20:1.39	198310	Lymphocyte antigen 75 OS=Homo sapiens GN=LY75 PE=1 SV=3
1831	2069	O43172|PRP4_HUMAN	51.75	17	6	6	Carbamidomethylation	302000000	410000000	196000000	295000000	376000000	185000000	228000000	277000000	149000000	300000000	438000000	176000000	137000000	219000000	130000000	385000000	265000000	403000000	1.01:1.37:0.65:0.98:1.25:0.62:0.76:0.92:0.50:1.00:1.46:0.59:0.46:0.73:0.43:1.28:0.88:1.35	303000000	285000000	247000000	305000000	162000000	366000000	0.99:0.94:0.81:1.00:0.53:1.20	58449	U4/U6 small nuclear ribonucleoprotein Prp4 OS=Homo sapiens GN=PRPF4 PE=1 SV=2
2986	2271	P51451|BLK_HUMAN	51.72	2	1	1	Phosphorylation (STY)	16300000	15000000	116000000	97000000	39300000	59800000	121000000	66800000	123000000	308000000	151000000	108000000	45900000	87300000	3190000	207000000	320000000	129000000	0.05:0.05:0.38:0.31:0.13:0.19:0.39:0.22:0.40:1.00:0.49:0.35:0.15:0.28:0.02:0.67:1.04:0.42	132000000	65400000	103000000	189000000	65200000	219000000	0.70:0.35:0.55:1.00:0.35:1.16	57707	Tyrosine-protein kinase Blk OS=Homo sapiens GN=BLK PE=1 SV=3
129	38	O75533|SF3B1_HUMAN	51.71	22	23	23	Carbamidomethylation; Pyro-glu from Q; Acetylation (N-term); Deamidation (NQ)	1480000000	1560000000	988000000	1860000000	1680000000	1120000000	1740000000	2330000000	1400000000	2090000000	1850000000	1440000000	2400000000	2100000000	2660000000	2260000000	2990000000	2260000000	0.71:0.75:0.47:0.89:0.80:0.53:0.83:1.11:0.67:1.00:0.88:0.69:1.15:1.00:1.27:1.08:1.43:1.08	1340000000	1580000000	1820000000	1790000000	2920000000	3060000000	0.75:0.88:1.02:1.00:1.63:1.71	145830	Splicing factor 3B subunit 1 OS=Homo sapiens GN=SF3B1 PE=1 SV=3
1496	2313	O43865|SAHH2_HUMAN	51.53	10	4	2	Carbamidomethylation; Acetylation (N-term)	63200000	58400000	0	47000000	51800000	34500000	76500000	93400000	83600000	92700000	96800000	71300000	21100000	20200000	17500000	142000000	134000000	90600000	0.68:0.63:0:0.51:0.56:0.37:0.83:1.01:0.90:1.00:1.04:0.77:0.23:0.22:0.19:1.53:1.45:0.98	60800000	44400000	84500000	86900000	19600000	122000000	0.70:0.51:0.97:1.00:0.23:1.41	58952	Adenosylhomocysteinase 2 OS=Homo sapiens GN=AHCYL1 PE=1 SV=2
1337	976	P62277|RS13_HUMAN	51.42	27	5	5	Acetylation (N-term); Deamidation (NQ)	2780000000	2650000000	1970000000	3570000000	2960000000	2700000000	3290000000	3600000000	2390000000	5440000000	4840000000	3330000000	3570000000	3300000000	2170000000	5230000000	4990000000	3560000000	0.51:0.49:0.36:0.66:0.54:0.50:0.60:0.66:0.44:1.00:0.89:0.61:0.66:0.61:0.40:0.96:0.92:0.66	2470000000	3080000000	3130000000	4560000000	3010000000	4600000000	0.54:0.68:0.69:1.00:0.66:1.01	17222	40S ribosomal protein S13 OS=Homo sapiens GN=RPS13 PE=1 SV=2
1410	1754	Q9NUB1|ACS2L_HUMAN	51.38	11	5	5		443000000	422000000	321000000	476000000	488000000	347000000	668000000	729000000	443000000	616000000	660000000	434000000	555000000	560000000	462000000	774000000	813000000	623000000	0.72:0.69:0.52:0.77:0.79:0.56:1.09:1.18:0.72:1.00:1.07:0.70:0.90:0.91:0.75:1.26:1.32:1.01	396000000	437000000	614000000	570000000	525000000	737000000	0.69:0.77:1.08:1.00:0.92:1.29	74857	Acetyl-coenzyme A synthetase 2-like mitochondrial OS=Homo sapiens GN=ACSS1 PE=1 SV=2
1182	1080	Q9NX58|LYAR_HUMAN	51.36	30	8	8	Pyro-glu from Q; Carbamidomethylation; Deamidation (NQ)	758000000	875000000	667000000	511000000	700000000	518000000	1220000000	998000000	774000000	673000000	781000000	467000000	554000000	602000000	449000000	922000000	737000000	611000000	1.13:1.30:0.99:0.76:1.04:0.77:1.81:1.48:1.15:1.00:1.16:0.69:0.82:0.89:0.67:1.37:1.10:0.91	777000000	599000000	1030000000	656000000	545000000	809000000	1.18:0.91:1.57:1.00:0.83:1.23	43615	Cell growth-regulating nucleolar protein OS=Homo sapiens GN=LYAR PE=1 SV=2
861	1576	Q96I99|SUCB2_HUMAN	51.36	27	6	6	Carbamidomethylation	848000000	817000000	632000000	1040000000	1670000000	997000000	871000000	902000000	722000000	1080000000	1200000000	904000000	906000000	1090000000	706000000	1570000000	1410000000	1290000000	0.78:0.75:0.58:0.96:1.54:0.92:0.80:0.83:0.67:1.00:1.11:0.83:0.84:1.00:0.65:1.45:1.30:1.19	811000000	1330000000	886000000	1060000000	951000000	1430000000	0.76:1.25:0.83:1.00:0.89:1.34	46511	Succinyl-CoA ligase [GDP-forming] subunit beta mitochondrial OS=Homo sapiens GN=SUCLG2 PE=1 SV=2
1023	1557	O94915|FRYL_HUMAN	51.35	2	3	3	Acetylation (N-term)	199000000	220000000	171000000	279000000	178000000	196000000	306000000	342000000	208000000	213000000	253000000	210000000	304000000	315000000	246000000	395000000	346000000	357000000	0.93:1.03:0.80:1.31:0.84:0.92:1.44:1.60:0.98:1.00:1.19:0.99:1.43:1.48:1.16:1.85:1.62:1.68	197000000	218000000	285000000	226000000	289000000	366000000	0.87:0.97:1.27:1.00:1.28:1.62	339598	Protein furry homolog-like OS=Homo sapiens GN=FRYL PE=1 SV=2
2136	1526	Q9BUL8|PDC10_HUMAN	51.35	15	3	3		539000000	452000000	379000000	671000000	815000000	423000000	520000000	484000000	340000000	664000000	652000000	406000000	640000000	576000000	417000000	765000000	1170000000	613000000	0.81:0.68:0.57:1.01:1.23:0.64:0.78:0.73:0.51:1.00:0.98:0.61:0.96:0.87:0.63:1.15:1.76:0.92	526000000	637000000	460000000	584000000	544000000	947000000	0.90:1.09:0.79:1.00:0.93:1.62	24702	Programmed cell death protein 10 OS=Homo sapiens GN=PDCD10 PE=1 SV=1
384	353	P31150|GDIA_HUMAN	51.29	43	17	8	Pyro-glu from Q; Carbamidomethylation	676000000	671000000	644000000	805000000	873000000	754000000	1240000000	1000000000	811000000	845000000	688000000	792000000	900000000	771000000	742000000	1350000000	1350000000	1000000000	0.80:0.79:0.76:0.95:1.03:0.89:1.47:1.18:0.96:1.00:0.81:0.94:1.07:0.91:0.88:1.59:1.60:1.19	663000000	811000000	1020000000	775000000	804000000	1230000000	0.86:1.05:1.31:1.00:1.04:1.59	50583	Rab GDP dissociation inhibitor alpha OS=Homo sapiens GN=GDI1 PE=1 SV=2
1083	804	P04150|GCR_HUMAN	51.28	12	6	6	Carbamidomethylation; Deamidation (NQ); Acetylation (N-term)	158000000	125000000	195000000	70700000	136000000	205000000	189000000	196000000	263000000	280000000	311000000	331000000	177000000	161000000	169000000	261000000	212000000	416000000	0.56:0.45:0.69:0.25:0.48:0.73:0.67:0.70:0.94:1.00:1.11:1.18:0.63:0.57:0.60:0.93:0.75:1.48	208000000	211000000	263000000	363000000	246000000	431000000	0.57:0.58:0.72:1.00:0.68:1.18	85659	Glucocorticoid receptor OS=Homo sapiens GN=NR3C1 PE=1 SV=1
1773	2044	P62306|RUXF_HUMAN	51.11	49	7	7	Acetylation (N-term); Deamidation (NQ); Carbamidomethylation	773000000	951000000	941000000	500000000	1080000000	481000000	336000000	613000000	558000000	514000000	509000000	361000000	497000000	521000000	416000000	1140000000	1330000000	683000000	1.51:1.85:1.83:0.97:2.10:0.94:0.65:1.19:1.09:1.00:0.99:0.70:0.97:1.01:0.81:2.21:2.59:1.33	898000000	686000000	520000000	484000000	486000000	1100000000	1.86:1.42:1.07:1.00:1.00:2.27	9725	Small nuclear ribonucleoprotein F OS=Homo sapiens GN=SNRPF PE=1 SV=1
2614	2396	P21127|CD11B_HUMAN	51.1	6	3	3		292000000	292000000	251000000	136000000	278000000	217000000	480000000	413000000	278000000	337000000	305000000	273000000	291000000	352000000	296000000	418000000	453000000	402000000	0.87:0.87:0.75:0.40:0.83:0.64:1.43:1.23:0.83:1.00:0.90:0.81:0.86:1.05:0.88:1.24:1.35:1.19	278000000	271000000	390000000	305000000	313000000	424000000	0.91:0.89:1.28:1.00:1.03:1.39	92707	Cyclin-dependent kinase 11B OS=Homo sapiens GN=CDK11B PE=1 SV=3
4675	2966	Q86UF1|TSN33_HUMAN	51.1	4	1	1	Carbamidomethylation	35800000	38700000	27200000	74500000	85700000	43500000	16200000	14400000	13700000	73000000	75800000	42500000	31200000	38300000	24600000	111000000	105000000	64100000	0.49:0.53:0.37:1.02:1.17:0.60:0.22:0.20:0.19:1.00:1.04:0.58:0.43:0.52:0.34:1.52:1.43:0.88	33900000	67900000	14800000	63800000	31400000	93200000	0.53:1.06:0.23:1.00:0.49:1.46	31538	Tetraspanin-33 OS=Homo sapiens GN=TSPAN33 PE=2 SV=1
420	537	P11216|PYGB_HUMAN	51.09	23	14	10	Carbamidomethylation; Pyro-glu from Q	857000000	753000000	568000000	917000000	929000000	736000000	986000000	1030000000	715000000	893000000	951000000	661000000	1080000000	1290000000	843000000	1650000000	1230000000	1170000000	0.96:0.84:0.64:1.03:1.04:0.82:1.10:1.15:0.80:1.00:1.06:0.74:1.21:1.45:0.94:1.85:1.37:1.31	726000000	861000000	909000000	835000000	1070000000	1350000000	0.87:1.03:1.09:1.00:1.29:1.62	96696	Glycogen phosphorylase brain form OS=Homo sapiens GN=PYGB PE=1 SV=5
930	1304	O43264|ZW10_HUMAN	50.98	10	4	4	Carbamidomethylation	356000000	329000000	277000000	332000000	487000000	298000000	339000000	319000000	159000000	346000000	504000000	371000000	425000000	456000000	345000000	666000000	496000000	626000000	1.03:0.95:0.80:0.96:1.41:0.86:0.98:0.92:0.46:1.00:1.46:1.07:1.23:1.32:1.00:1.92:1.43:1.81	321000000	372000000	337000000	407000000	409000000	596000000	0.79:0.91:0.83:1.00:1.00:1.46	88830	Centromere/kinetochore protein zw10 homolog OS=Homo sapiens GN=ZW10 PE=1 SV=3
1673	5504	Q6ZQQ6|WDR87_HUMAN	50.86	0	1	1	Oxidation (M)	376000000	413000000	1930000000	268000000	187000000	2870000000	386000000	279000000	2110000000	437000000	173000000	1840000000	86300000	109000000	2050000000	212000000	233000000	1020000000	0.86:0.94:4.41:0.61:0.43:6.56:0.88:0.64:4.83:1.00:0.39:4.22:0.20:0.25:4.68:0.49:0.53:2.33	1890000000	2940000000	2140000000	1910000000	2080000000	1110000000	0.99:1.54:1.12:1.00:1.09:0.58	333185	WD repeat-containing protein 87 OS=Homo sapiens GN=WDR87 PE=1 SV=3
534	396	P27695|APEX1_HUMAN	50.85	41	9	9	Carbamidomethylation	1950000000	1340000000	2070000000	2440000000	2250000000	3000000000	2970000000	2500000000	2340000000	2770000000	2880000000	2110000000	2720000000	3160000000	2250000000	3680000000	3200000000	3060000000	0.70:0.48:0.75:0.88:0.81:1.08:1.07:0.90:0.85:1.00:1.04:0.76:0.98:1.14:0.81:1.33:1.16:1.10	1790000000	2560000000	2620000000	2590000000	2730000000	3320000000	0.69:0.99:1.01:1.00:1.06:1.28	35555	DNA-(apurinic or apyrimidinic site) lyase OS=Homo sapiens GN=APEX1 PE=1 SV=2
1677	2359	O00159|MYO1C_HUMAN	50.85	4	3	3	Deamidation (NQ)	133000000	234000000	155000000	373000000	311000000	266000000	115000000	266000000	132000000	89100000	110000000	86000000	177000000	199000000	157000000	219000000	320000000	233000000	1.49:2.63:1.74:4.19:3.50:2.98:1.29:2.98:1.48:1.00:1.23:0.97:1.99:2.24:1.76:2.46:3.59:2.61	198000000	317000000	199000000	95000000	182000000	286000000	2.08:3.34:2.09:1.00:1.92:3.01	121682	Unconventional myosin-Ic OS=Homo sapiens GN=MYO1C PE=1 SV=4
2401	1935	P22830|HEMH_HUMAN	50.84	4	2	2		41700000	46700000	22200000	52200000	45300000	30200000	28000000	27500000	20300000	55600000	46400000	37400000	1750000	2370000	2380000	68900000	74100000	41700000	0.75:0.84:0.40:0.94:0.82:0.54:0.50:0.49:0.37:1.00:0.83:0.67:0.03:0.04:0.04:1.24:1.33:0.75	36900000	42500000	25300000	46400000	2160000	61600000	0.79:0.92:0.54:1.00:0.05:1.33	47862	Ferrochelatase mitochondrial OS=Homo sapiens GN=FECH PE=1 SV=2
877	697	P18085|ARF4_HUMAN	50.79	24	5	3	Pyro-glu from Q; Deamidation (NQ)	546000000	715000000	343000000	663000000	861000000	408000000	981000000	917000000	519000000	677000000	419000000	369000000	320000000	610000000	373000000	764000000	688000000	361000000	0.81:1.06:0.51:0.98:1.27:0.60:1.45:1.35:0.77:1.00:0.62:0.55:0.47:0.90:0.55:1.13:1.02:0.53	535000000	644000000	806000000	592000000	526000000	623000000	0.90:1.09:1.36:1.00:0.89:1.05	20511	ADP-ribosylation factor 4 OS=Homo sapiens GN=ARF4 PE=1 SV=3
677	989	P42566|EPS15_HUMAN	50.67	16	9	9	Carbamidomethylation; Acetylation (N-term); Oxidation (M); Citrullination; Deamidation (NQ)	212000000	181000000	205000000	1440000000	2030000000	290000000	395000000	1050000000	702000000	239000000	270000000	203000000	352000000	258000000	248000000	391000000	352000000	313000000	0.89:0.76:0.86:6.03:8.49:1.21:1.65:4.40:2.94:1.00:1.13:0.85:1.47:1.08:1.04:1.64:1.47:1.31	199000000	1250000000	924000000	237000000	286000000	353000000	0.84:5.28:3.89:1.00:1.20:1.49	98656	Epidermal growth factor receptor substrate 15 OS=Homo sapiens GN=EPS15 PE=1 SV=2
1839	1965	Q00169|PIPNA_HUMAN	50.65	30	5	5		343000000	274000000	292000000	249000000	476000000	324000000	431000000	538000000	241000000	536000000	487000000	231000000	552000000	588000000	382000000	693000000	524000000	465000000	0.64:0.51:0.54:0.47:0.89:0.61:0.80:1.00:0.45:1.00:0.91:0.43:1.03:1.10:0.71:1.29:0.98:0.87	303000000	414000000	444000000	418000000	507000000	561000000	0.72:0.99:1.06:1.00:1.21:1.34	31806	Phosphatidylinositol transfer protein alpha isoform OS=Homo sapiens GN=PITPNA PE=1 SV=2
823	471	Q9HB71|CYBP_HUMAN	50.64	44	9	9	Deamidation (NQ); Carbamidomethylation	2460000000	3160000000	1950000000	3970000000	3560000000	3250000000	1770000000	3460000000	1990000000	3220000000	2880000000	2510000000	3190000000	2720000000	2620000000	4490000000	5510000000	4010000000	0.76:0.98:0.61:1.23:1.11:1.01:0.55:1.07:0.62:1.00:0.89:0.78:0.99:0.85:0.82:1.40:1.71:1.25	2610000000	3730000000	2530000000	2870000000	2850000000	4670000000	0.91:1.30:0.88:1.00:0.99:1.63	26210	Calcyclin-binding protein OS=Homo sapiens GN=CACYBP PE=1 SV=2
2579	1788	Q9Y2H6|FND3A_HUMAN	50.59	3	3	3	Carbamidomethylation; Acetylation (N-term); Oxidation (HW); Citrullination	171000000	231000000	106000000	298000000	263000000	135000000	76000000	192000000	105000000	268000000	265000000	119000000	187000000	190000000	102000000	193000000	290000000	88900000	0.64:0.86:0.40:1.11:0.98:0.50:0.28:0.71:0.39:1.00:0.99:0.44:0.70:0.71:0.38:0.72:1.08:0.33	170000000	232000000	137000000	217000000	160000000	190000000	0.78:1.07:0.63:1.00:0.74:0.88	131852	Fibronectin type-III domain-containing protein 3A OS=Homo sapiens GN=FNDC3A PE=1 SV=4
1866	1175	Q9H910|HN1L_HUMAN	50.57	36	4	4	Acetylation (N-term)	618000000	603000000	400000000	1000000000	776000000	694000000	693000000	453000000	439000000	599000000	745000000	432000000	454000000	507000000	307000000	1030000000	1120000000	852000000	1.03:1.01:0.67:1.67:1.29:1.16:1.16:0.76:0.73:1.00:1.24:0.72:0.76:0.85:0.51:1.72:1.87:1.42	540000000	825000000	528000000	618000000	422000000	1000000000	0.87:1.34:0.86:1.00:0.68:1.62	20063	Hematological and neurological expressed 1-like protein OS=Homo sapiens GN=HN1L PE=1 SV=1
3005	1896	Q13094|LCP2_HUMAN	50.52	8	3	3		190000000	248000000	82800000	155000000	183000000	137000000	275000000	267000000	205000000	207000000	54700000	100000000	139000000	160000000	105000000	130000000	74600000	91800000	0.92:1.20:0.40:0.75:0.88:0.66:1.33:1.29:0.99:1.00:0.26:0.48:0.67:0.77:0.51:0.63:0.36:0.44	205000000	158000000	249000000	164000000	135000000	99000000	1.25:0.96:1.52:1.00:0.82:0.60	60188	Lymphocyte cytosolic protein 2 OS=Homo sapiens GN=LCP2 PE=1 SV=1
1655	1710	Q14669|TRIPC_HUMAN	50.5	4	6	6	Deamidation (NQ); Carbamidomethylation; Phosphorylation (STY)	752000000	677000000	550000000	622000000	779000000	431000000	541000000	525000000	231000000	423000000	366000000	141000000	411000000	426000000	231000000	382000000	513000000	323000000	1.78:1.60:1.30:1.47:1.84:1.02:1.28:1.24:0.55:1.00:0.87:0.33:0.97:1.01:0.55:0.90:1.21:0.76	660000000	611000000	506000000	348000000	356000000	437000000	1.89:1.75:1.45:1.00:1.02:1.26	220432	E3 ubiquitin-protein ligase TRIP12 OS=Homo sapiens GN=TRIP12 PE=1 SV=1
1330	953	O95218|ZRAB2_HUMAN	50.46	18	4	4	Carbamidomethylation	147000000	157000000	176000000	154000000	374000000	111000000	84600000	189000000	197000000	297000000	568000000	183000000	304000000	441000000	150000000	516000000	336000000	273000000	0.49:0.53:0.59:0.52:1.26:0.37:0.28:0.64:0.66:1.00:1.91:0.62:1.02:1.48:0.50:1.74:1.13:0.92	160000000	213000000	157000000	349000000	298000000	375000000	0.46:0.61:0.45:1.00:0.85:1.07	37404	Zinc finger Ran-binding domain-containing protein 2 OS=Homo sapiens GN=ZRANB2 PE=1 SV=2
2685	2045	Q9Y244|POMP_HUMAN	50.38	35	3	3	Citrullination	708000000	709000000	642000000	818000000	1030000000	601000000	414000000	542000000	366000000	656000000	774000000	453000000	581000000	741000000	636000000	887000000	971000000	839000000	1.08:1.08:0.98:1.25:1.57:0.92:0.63:0.83:0.56:1.00:1.18:0.69:0.89:1.13:0.97:1.35:1.48:1.28	686000000	815000000	452000000	648000000	653000000	899000000	1.06:1.26:0.70:1.00:1.01:1.39	15789	Proteasome maturation protein OS=Homo sapiens GN=POMP PE=1 SV=1
863	947	O75534|CSDE1_HUMAN	50.37	12	8	8	Carbamidomethylation; Acetylation (N-term); Deamidation (NQ)	669000000	558000000	423000000	743000000	708000000	555000000	737000000	685000000	643000000	849000000	736000000	666000000	610000000	719000000	389000000	1190000000	883000000	978000000	0.79:0.66:0.50:0.88:0.83:0.65:0.87:0.81:0.76:1.00:0.87:0.78:0.72:0.85:0.46:1.40:1.04:1.15	550000000	669000000	688000000	750000000	573000000	1020000000	0.73:0.89:0.92:1.00:0.76:1.36	88885	Cold shock domain-containing protein E1 OS=Homo sapiens GN=CSDE1 PE=1 SV=2
1669	1407	Q7Z2Z2|EFL1_HUMAN	50.34	5	3	3	Carbamidomethylation	166000000	202000000	145000000	177000000	208000000	72800000	249000000	189000000	172000000	226000000	334000000	129000000	173000000	185000000	160000000	252000000	525000000	185000000	0.74:0.89:0.64:0.78:0.92:0.32:1.10:0.84:0.76:1.00:1.48:0.57:0.77:0.82:0.71:1.12:2.33:0.82	171000000	152000000	203000000	230000000	173000000	363000000	0.74:0.66:0.88:1.00:0.75:1.58	125430	Elongation factor-like GTPase 1 OS=Homo sapiens GN=EFL1 PE=1 SV=2
54	12	P31939|PUR9_HUMAN	50.34	58	30	30	Carbamidomethylation; Acetylation (N-term); Deamidation (NQ); Oxidation (M); Pyro-glu from Q	5230000000	6620000000	5510000000	7500000000	8540000000	5420000000	10600000000	7530000000	7050000000	8670000000	8790000000	6720000000	8170000000	9260000000	6960000000	12900000000	9950000000	9230000000	0.60:0.76:0.64:0.87:0.98:0.63:1.22:0.87:0.81:1.00:1.01:0.77:0.94:1.07:0.80:1.49:1.15:1.06	6300000000	7150000000	8400000000	8060000000	8130000000	10700000000	0.78:0.89:1.04:1.00:1.01:1.33	64616	Bifunctional purine biosynthesis protein PURH OS=Homo sapiens GN=ATIC PE=1 SV=3
6656	3119	Q6I9Y2|THOC7_HUMAN	50.32	5	1	1	Acetylation (N-term)	42500000	39800000	29900000	59400000	70200000	30800000	37000000	57200000	34000000	104000000	82600000	44100000	52600000	47300000	26200000	108000000	79800000	47700000	0.41:0.38:0.29:0.57:0.68:0.30:0.36:0.55:0.33:1.00:0.80:0.43:0.51:0.46:0.25:1.04:0.77:0.46	37400000	53500000	42700000	76800000	42000000	78600000	0.49:0.70:0.56:1.00:0.55:1.02	23743	THO complex subunit 7 homolog OS=Homo sapiens GN=THOC7 PE=1 SV=3
2183	1727	P52594|AGFG1_HUMAN	50.27	9	3	3	Acetylation (N-term); Deamidation (NQ)	206000000	228000000	203000000	526000000	330000000	277000000	194000000	231000000	188000000	563000000	299000000	426000000	279000000	142000000	121000000	301000000	455000000	225000000	0.37:0.41:0.36:0.93:0.59:0.49:0.34:0.41:0.33:1.00:0.53:0.76:0.50:0.25:0.21:0.53:0.81:0.40	213000000	378000000	226000000	430000000	181000000	327000000	0.49:0.88:0.53:1.00:0.42:0.76	58260	Arf-GAP domain and FG repeat-containing protein 1 OS=Homo sapiens GN=AGFG1 PE=1 SV=2
1076	1085	P07108|ACBP_HUMAN	50.22	32	2	2	Acetylation (N-term); Deamidation (NQ); Pyro-glu from Q; Oxidation (M)	3740000000	3930000000	3470000000	6320000000	5940000000	3980000000	2070000000	4670000000	2860000000	5490000000	7210000000	4020000000	3210000000	5000000000	4000000000	8490000000	4770000000	7330000000	0.68:0.72:0.63:1.15:1.08:0.72:0.38:0.85:0.52:1.00:1.31:0.73:0.58:0.91:0.73:1.55:0.87:1.33	3710000000	5410000000	3200000000	5630000000	4070000000	6860000000	0.66:0.96:0.57:1.00:0.72:1.22	10044	Acyl-CoA-binding protein OS=Homo sapiens GN=DBI PE=1 SV=2
750	482	P54920|SNAA_HUMAN	50.19	47	11	9	Deamidation (NQ); Carbamidomethylation	1400000000	1340000000	886000000	1330000000	1830000000	1110000000	828000000	1530000000	948000000	1520000000	1950000000	1020000000	1210000000	2000000000	1270000000	2530000000	2120000000	2040000000	0.92:0.88:0.58:0.87:1.20:0.73:0.54:1.00:0.62:1.00:1.28:0.67:0.80:1.31:0.83:1.66:1.40:1.34	1210000000	1440000000	1100000000	1500000000	1500000000	2230000000	0.81:0.96:0.74:1.00:1.00:1.49	33233	Alpha-soluble NSF attachment protein OS=Homo sapiens GN=NAPA PE=1 SV=3
764	843	Q96I15|SCLY_HUMAN	50.18	21	7	7	Carbamidomethylation; Pyro-glu from Q; Oxidation (M)	537000000	516000000	154000000	651000000	604000000	236000000	451000000	258000000	262000000	550000000	500000000	232000000	416000000	628000000	143000000	799000000	802000000	629000000	0.98:0.94:0.28:1.18:1.10:0.43:0.82:0.47:0.48:1.00:0.91:0.42:0.76:1.14:0.26:1.45:1.46:1.14	509000000	606000000	407000000	513000000	395000000	743000000	0.99:1.18:0.79:1.00:0.77:1.45	48149	Selenocysteine lyase OS=Homo sapiens GN=SCLY PE=1 SV=4
926	992	Q96KR1|ZFR_HUMAN	50.14	15	9	9	Carbamidomethylation; Acetylation (N-term); Phosphorylation (STY)	386000000	421000000	277000000	530000000	559000000	406000000	401000000	565000000	352000000	514000000	523000000	341000000	456000000	472000000	329000000	693000000	716000000	592000000	0.75:0.82:0.54:1.03:1.09:0.79:0.78:1.10:0.68:1.00:1.02:0.66:0.89:0.92:0.64:1.35:1.39:1.15	361000000	498000000	440000000	459000000	443000000	699000000	0.79:1.09:0.96:1.00:0.97:1.52	117012	Zinc finger RNA-binding protein OS=Homo sapiens GN=ZFR PE=1 SV=2
1399	1983	Q13144|EI2BE_HUMAN	50	9	4	4	Carbamidomethylation; Acetylation (N-term)	619000000	555000000	444000000	402000000	299000000	372000000	373000000	744000000	445000000	471000000	881000000	355000000	398000000	807000000	506000000	1210000000	789000000	989000000	1.31:1.18:0.94:0.85:0.63:0.79:0.79:1.58:0.94:1.00:1.87:0.75:0.85:1.71:1.07:2.56:1.67:2.10	539000000	358000000	521000000	569000000	570000000	995000000	0.95:0.63:0.92:1.00:1.00:1.75	80380	Translation initiation factor eIF-2B subunit epsilon OS=Homo sapiens GN=EIF2B5 PE=1 SV=3
2478	3295	P20645|MPRD_HUMAN	49.99	16	4	4	Carbamidomethylation	723000000	528000000	448000000	762000000	824000000	401000000	509000000	788000000	918000000	788000000	891000000	552000000	599000000	1380000000	454000000	1520000000	799000000	812000000	0.92:0.67:0.57:0.97:1.05:0.51:0.65:1.00:1.17:1.00:1.13:0.70:0.76:1.75:0.58:1.94:1.02:1.03	611000000	662000000	784000000	798000000	811000000	1050000000	0.77:0.83:0.98:1.00:1.02:1.31	30993	Cation-dependent mannose-6-phosphate receptor OS=Homo sapiens GN=M6PR PE=1 SV=1
3392	2603	P35610|SOAT1_HUMAN	49.9	3	1	1		161000000	149000000	125000000	139000000	183000000	102000000	65200000	124000000	93400000	78800000	156000000	45400000	65400000	102000000	68900000	287000000	195000000	226000000	2.05:1.89:1.59:1.76:2.32:1.29:0.83:1.57:1.19:1.00:1.97:0.58:0.83:1.29:0.87:3.64:2.48:2.87	145000000	141000000	94100000	93300000	78700000	422000000	1.56:1.51:1.01:1.00:0.84:4.53	64735	Sterol O-acyltransferase 1 OS=Homo sapiens GN=SOAT1 PE=1 SV=3
1576	1722	Q5JRA6|MIA3_HUMAN	49.71	3	3	3		155000000	177000000	105000000	164000000	214000000	136000000	75800000	117000000	86200000	104000000	194000000	77800000	175000000	184000000	138000000	233000000	249000000	195000000	1.49:1.70:1.01:1.58:2.06:1.31:0.73:1.13:0.83:1.00:1.86:0.75:1.68:1.77:1.33:2.24:2.40:1.88	146000000	171000000	93100000	125000000	166000000	226000000	1.16:1.37:0.74:1.00:1.32:1.80	213700	Melanoma inhibitory activity protein 3 OS=Homo sapiens GN=MIA3 PE=1 SV=1
4033	83427	O43913|ORC5_HUMAN	49.65	6	2	2	Phosphorylation (STY)	110000000	97300000	103000000	123000000	38200000	92800000	187000000	150000000	131000000	161000000	144000000	113000000	89000000	108000000	73700000	151000000	191000000	118000000	0.68:0.61:0.64:0.77:0.24:0.58:1.16:0.93:0.81:1.00:0.90:0.70:0.55:0.67:0.46:0.94:1.19:0.73	103000000	84700000	156000000	139000000	90400000	153000000	0.74:0.61:1.12:1.00:0.65:1.10	50283	Origin recognition complex subunit 5 OS=Homo sapiens GN=ORC5 PE=1 SV=1
187	205	O14980|XPO1_HUMAN	49.64	14	13	13	Carbamidomethylation; Pyro-glu from Q; Acetylation (N-term); Deamidation (NQ)	917000000	815000000	620000000	1230000000	525000000	1150000000	1540000000	1120000000	981000000	548000000	716000000	941000000	1090000000	966000000	708000000	1660000000	1850000000	977000000	1.67:1.49:1.13:2.24:0.96:2.09:2.81:2.05:1.79:1.00:1.31:1.71:1.98:1.76:1.29:3.03:3.37:1.78	934000000	999000000	1220000000	990000000	1010000000	1500000000	0.94:1.01:1.23:1.00:1.02:1.51	123386	Exportin-1 OS=Homo sapiens GN=XPO1 PE=1 SV=1
929	998	O94874|UFL1_HUMAN	49.57	17	10	10	Carbamidomethylation; Phosphorylation (STY)	291000000	246000000	322000000	231000000	397000000	412000000	354000000	242000000	343000000	428000000	422000000	358000000	410000000	579000000	393000000	681000000	481000000	419000000	0.68:0.57:0.75:0.54:0.93:0.96:0.83:0.57:0.80:1.00:0.99:0.84:0.96:1.35:0.92:1.59:1.12:0.98	287000000	347000000	313000000	403000000	461000000	585000000	0.71:0.86:0.78:1.00:1.14:1.45	89595	E3 UFM1-protein ligase 1 OS=Homo sapiens GN=UFL1 PE=1 SV=2
1068	1071	P62879|GBB2_HUMAN	49.56	15	4	2	Carbamidomethylation	803000000	711000000	678000000	1070000000	784000000	1060000000	932000000	716000000	566000000	1110000000	1030000000	893000000	622000000	733000000	559000000	1560000000	1510000000	966000000	0.73:0.64:0.61:0.97:0.71:0.95:0.84:0.65:0.51:1.00:0.93:0.81:0.56:0.66:0.50:1.41:1.36:0.87	731000000	1070000000	738000000	1010000000	638000000	1340000000	0.72:1.06:0.73:1.00:0.63:1.33	37331	Guanine nucleotide-binding protein G(I)/G(S)/G(T) subunit beta-2 OS=Homo sapiens GN=GNB2 PE=1 SV=3
648	1261	Q9Y4G6|TLN2_HUMAN	49.56	3	8	3	Carbamidomethylation; Pyro-glu from Q; Deamidation (NQ); Oxidation (M); Acetylation (N-term)	223000000	197000000	103000000	136000000	180000000	89800000	215000000	333000000	197000000	235000000	260000000	157000000	158000000	154000000	124000000	331000000	251000000	156000000	0.95:0.84:0.44:0.58:0.76:0.38:0.92:1.42:0.84:1.00:1.10:0.67:0.67:0.66:0.53:1.41:1.07:0.66	174000000	135000000	249000000	217000000	145000000	271000000	0.80:0.62:1.14:1.00:0.67:1.25	271611	Talin-2 OS=Homo sapiens GN=TLN2 PE=1 SV=4
2773	7056	Q9NR46|SHLB2_HUMAN	49.56	7	3	3	Acetylation (N-term)	107000000	115000000	83200000	34600000	141000000	88400000	125000000	153000000	147000000	175000000	137000000	160000000	151000000	113000000	113000000	233000000	247000000	203000000	0.62:0.66:0.48:0.20:0.81:0.51:0.72:0.88:0.84:1.00:0.79:0.92:0.87:0.65:0.65:1.33:1.42:1.16	102000000	113000000	142000000	157000000	126000000	228000000	0.65:0.72:0.90:1.00:0.80:1.45	43974	Endophilin-B2 OS=Homo sapiens GN=SH3GLB2 PE=1 SV=1
2907	2244	Q9P2K5|MYEF2_HUMAN	49.52	6	2	2		0	27300000	0	149000000	11100000	143000000	95700000	0	41300000	161000000	15900000	108000000	184000000	158000000	0	94800000	326000000	85500000	0:0.17:0:0.92:0.07:0.88:0.59:0:0.26:1.00:0.10:0.67:1.14:0.98:0:0.59:2.02:0.53	27300000	101000000	137000000	95000000	192000000	169000000	0.29:1.06:1.44:1.00:2.02:1.78	64122	Myelin expression factor 2 OS=Homo sapiens GN=MYEF2 PE=1 SV=3
577	350	Q9Y2Z0|SGT1_HUMAN	49.51	32	10	10	Deamidation (NQ)	2300000000	2660000000	1530000000	2310000000	2750000000	1850000000	1540000000	2840000000	1490000000	1850000000	1840000000	1390000000	2450000000	2550000000	2000000000	4990000000	3870000000	3080000000	1.24:1.44:0.83:1.25:1.48:1.00:0.83:1.53:0.81:1.00:0.99:0.75:1.32:1.37:1.08:2.69:2.09:1.66	2170000000	2310000000	1960000000	1690000000	2330000000	3980000000	1.28:1.36:1.16:1.00:1.38:2.35	41024	Protein SGT1 homolog OS=Homo sapiens GN=SUGT1 PE=1 SV=3
1877	1220	P60981|DEST_HUMAN	49.47	20	3	3	Carbamidomethylation; Acetylation (N-term)	1400000000	1690000000	1030000000	2430000000	1680000000	1820000000	1090000000	1350000000	780000000	2430000000	2670000000	1760000000	1780000000	1930000000	1210000000	2100000000	1730000000	1070000000	0.57:0.70:0.42:1.00:0.69:0.75:0.45:0.56:0.32:1.00:1.10:0.73:0.73:0.79:0.50:0.87:0.71:0.44	1380000000	1970000000	1070000000	2290000000	1690000000	1640000000	0.60:0.86:0.47:1.00:0.74:0.71	18506	Destrin OS=Homo sapiens GN=DSTN PE=1 SV=3
1987	16038	Q9NXF1|TEX10_HUMAN	49.47	6	4	4	Carbamidomethylation	158000000	154000000	138000000	165000000	53600000	94800000	190000000	218000000	167000000	139000000	133000000	116000000	190000000	185000000	155000000	195000000	197000000	166000000	1.13:1.10:0.99:1.18:0.38:0.68:1.37:1.56:1.20:1.00:0.95:0.83:1.37:1.33:1.11:1.40:1.42:1.19	150000000	117000000	192000000	130000000	177000000	186000000	1.16:0.90:1.48:1.00:1.37:1.44	105674	Testis-expressed sequence 10 protein OS=Homo sapiens GN=TEX10 PE=1 SV=2
2865	2633	Q92665|RT31_HUMAN	49.42	11	3	3		275000000	183000000	244000000	157000000	297000000	113000000	265000000	186000000	295000000	275000000	332000000	154000000	228000000	380000000	120000000	519000000	395000000	377000000	1.00:0.67:0.89:0.57:1.08:0.41:0.96:0.67:1.07:1.00:1.21:0.56:0.83:1.38:0.44:1.88:1.43:1.37	234000000	292000000	287000000	254000000	292000000	430000000	0.92:1.15:1.13:1.00:1.15:1.69	45319	28S ribosomal protein S31 mitochondrial OS=Homo sapiens GN=MRPS31 PE=1 SV=3
2145	3854	Q15645|PCH2_HUMAN	49.3	4	2	2	Acetylation (N-term)	39300000	138000000	106000000	160000000	78900000	90800000	147000000	159000000	139000000	179000000	119000000	127000000	188000000	196000000	135000000	123000000	230000000	29800000	0.22:0.77:0.59:0.90:0.44:0.51:0.82:0.89:0.78:1.00:0.67:0.71:1.05:1.09:0.76:0.69:1.29:0.17	111000000	125000000	148000000	142000000	173000000	160000000	0.78:0.88:1.05:1.00:1.22:1.13	48551	Pachytene checkpoint protein 2 homolog OS=Homo sapiens GN=TRIP13 PE=1 SV=2
1758	1473	Q9H6F5|CCD86_HUMAN	49.28	19	3	3	Phosphorylation (STY)	413000000	334000000	210000000	401000000	440000000	261000000	423000000	540000000	345000000	690000000	646000000	434000000	336000000	389000000	231000000	553000000	723000000	482000000	0.60:0.48:0.30:0.58:0.64:0.38:0.61:0.78:0.50:1.00:0.94:0.63:0.49:0.56:0.34:0.80:1.05:0.70	319000000	367000000	436000000	590000000	320000000	586000000	0.54:0.62:0.74:1.00:0.54:0.99	40236	Coiled-coil domain-containing protein 86 OS=Homo sapiens GN=CCDC86 PE=1 SV=1
849	1239	Q8TDD1|DDX54_HUMAN	49.23	8	4	4	Carbamidomethylation; Pyro-glu from Q	367000000	399000000	276000000	399000000	466000000	325000000	434000000	497000000	367000000	387000000	452000000	309000000	421000000	426000000	319000000	718000000	661000000	532000000	0.95:1.03:0.71:1.03:1.20:0.84:1.12:1.28:0.95:1.00:1.17:0.80:1.09:1.10:0.82:1.86:1.71:1.37	347000000	397000000	433000000	383000000	388000000	637000000	0.91:1.04:1.13:1.00:1.01:1.66	98595	ATP-dependent RNA helicase DDX54 OS=Homo sapiens GN=DDX54 PE=1 SV=2
468	315	P78344|IF4G2_HUMAN	49.21	20	12	12	Deamidation (NQ); Carbamidomethylation; Acetylation (N-term); Phosphorylation (STY)	463000000	370000000	481000000	569000000	367000000	421000000	760000000	616000000	671000000	858000000	558000000	558000000	548000000	562000000	348000000	845000000	961000000	605000000	0.54:0.43:0.56:0.66:0.43:0.49:0.89:0.72:0.78:1.00:0.65:0.65:0.64:0.66:0.41:0.99:1.12:0.71	438000000	452000000	683000000	658000000	486000000	804000000	0.67:0.69:1.04:1.00:0.74:1.22	102362	Eukaryotic translation initiation factor 4 gamma 2 OS=Homo sapiens GN=EIF4G2 PE=1 SV=1
1858	1106	P08574|CY1_HUMAN	49.13	15	4	4	Carbamidomethylation	717000000	450000000	300000000	718000000	690000000	396000000	602000000	788000000	584000000	1230000000	1160000000	761000000	692000000	946000000	333000000	1030000000	993000000	670000000	0.58:0.37:0.24:0.58:0.56:0.32:0.49:0.64:0.47:1.00:0.95:0.62:0.56:0.77:0.27:0.84:0.81:0.54	489000000	611000000	658000000	1050000000	657000000	942000000	0.46:0.58:0.63:1.00:0.62:0.90	35422	Cytochrome c1 heme protein mitochondrial OS=Homo sapiens GN=CYC1 PE=1 SV=3
2643	1769	Q9Y5Q9|TF3C3_HUMAN	49.1	4	2	2	Oxidation (M); Deamidation (NQ)	56200000	52100000	47300000	199000000	190000000	148000000	35900000	28000000	24700000	94000000	92100000	60900000	57500000	83600000	51800000	4120000	77000000	54600000	0.60:0.55:0.50:2.12:2.02:1.57:0.38:0.30:0.26:1.00:0.98:0.65:0.61:0.89:0.55:0.04:0.82:0.58	51900000	179000000	29500000	82300000	64300000	65400000	0.63:2.17:0.36:1.00:0.78:0.79	101272	General transcription factor 3C polypeptide 3 OS=Homo sapiens GN=GTF3C3 PE=1 SV=1
1088	1227	Q8IY81|SPB1_HUMAN	49.09	6	3	3	Deamidation (NQ)	314000000	325000000	250000000	359000000	257000000	246000000	407000000	455000000	309000000	303000000	353000000	236000000	361000000	456000000	280000000	634000000	489000000	506000000	1.04:1.07:0.82:1.19:0.85:0.81:1.34:1.50:1.02:1.00:1.17:0.78:1.19:1.50:0.92:2.09:1.61:1.67	296000000	300000000	390000000	297000000	366000000	543000000	1.00:1.01:1.31:1.00:1.23:1.83	96558	pre-rRNA processing protein FTSJ3 OS=Homo sapiens GN=FTSJ3 PE=1 SV=2
1383	20475	Q99700|ATX2_HUMAN	48.99	6	4	4	Deamidation (NQ)	416000000	360000000	372000000	333000000	185000000	265000000	184000000	321000000	152000000	226000000	240000000	189000000	219000000	224000000	183000000	341000000	232000000	217000000	1.84:1.59:1.65:1.47:0.82:1.17:0.81:1.42:0.67:1.00:1.06:0.83:0.97:0.99:0.81:1.51:1.03:0.96	383000000	292000000	285000000	218000000	209000000	299000000	1.75:1.34:1.30:1.00:0.96:1.37	140283	Ataxin-2 OS=Homo sapiens GN=ATXN2 PE=1 SV=2
2945	24207	Q7L592|NDUF7_HUMAN	48.98	9	3	3	Carbamidomethylation	368000000	615000000	238000000	484000000	255000000	435000000	176000000	316000000	180000000	296000000	277000000	259000000	193000000	268000000	206000000	278000000	251000000	213000000	1.24:2.08:0.80:1.63:0.86:1.47:0.59:1.07:0.61:1.00:0.93:0.87:0.65:0.90:0.70:0.94:0.85:0.72	407000000	391000000	224000000	318000000	222000000	247000000	1.28:1.23:0.70:1.00:0.70:0.78	49238	NADH dehydrogenase [ubiquinone] complex I assembly factor 7 OS=Homo sapiens GN=NDUFAF7 PE=1 SV=1
1862	1075	P62910|RL32_HUMAN	48.96	34	5	5	Carbamidomethylation; Acetylation (N-term); Deamidation (NQ)	863000000	859000000	626000000	812000000	917000000	673000000	1370000000	1550000000	818000000	1320000000	1660000000	989000000	814000000	682000000	546000000	1350000000	1300000000	712000000	0.65:0.65:0.47:0.61:0.69:0.51:1.04:1.18:0.62:1.00:1.26:0.75:0.62:0.52:0.41:1.02:0.99:0.54	794000000	801000000	1250000000	1360000000	681000000	1120000000	0.58:0.59:0.92:1.00:0.50:0.82	15860	60S ribosomal protein L32 OS=Homo sapiens GN=RPL32 PE=1 SV=2
3130	12643	Q96HC4|PDLI5_HUMAN	48.94	9	3	3	Acetylation (N-term)	1000000000	1190000000	198000000	906000000	1170000000	258000000	197000000	156000000	88300000	175000000	198000000	97100000	187000000	164000000	52600000	241000000	213000000	171000000	5.72:6.81:1.13:5.17:6.66:1.48:1.13:0.89:0.50:1.00:1.13:0.55:1.07:0.93:0.30:1.37:1.22:0.98	837000000	777000000	147000000	157000000	157000000	208000000	5.34:4.96:0.94:1.00:1.00:1.33	63945	PDZ and LIM domain protein 5 OS=Homo sapiens GN=PDLIM5 PE=1 SV=5
944	421	Q9Y295|DRG1_HUMAN	48.93	40	11	11	Carbamidomethylation	1240000000	892000000	924000000	1500000000	1450000000	1520000000	1860000000	1260000000	1220000000	1630000000	1390000000	1320000000	1210000000	1600000000	1170000000	1890000000	2010000000	1690000000	0.76:0.55:0.57:0.92:0.89:0.93:1.14:0.78:0.75:1.00:0.85:0.81:0.74:0.98:0.72:1.16:1.23:1.04	1080000000	1490000000	1620000000	1440000000	1330000000	1860000000	0.75:1.03:1.12:1.00:0.92:1.29	40542	Developmentally-regulated GTP-binding protein 1 OS=Homo sapiens GN=DRG1 PE=1 SV=1
923	1642	O95071|UBR5_HUMAN	48.85	2	3	3	Deamidation (NQ)	137000000	142000000	145000000	239000000	58600000	145000000	217000000	196000000	178000000	407000000	360000000	189000000	322000000	285000000	170000000	267000000	254000000	154000000	0.34:0.35:0.36:0.59:0.14:0.36:0.53:0.48:0.44:1.00:0.88:0.46:0.79:0.70:0.42:0.66:0.62:0.38	142000000	177000000	197000000	319000000	259000000	225000000	0.44:0.56:0.62:1.00:0.81:0.71	309352	E3 ubiquitin-protein ligase UBR5 OS=Homo sapiens GN=UBR5 PE=1 SV=2
4907	170440	Q8N4T8|CBR4_HUMAN	48.83	16	2	2	Carbamidomethylation	41300000	40700000	40600000	167000000	214000000	120000000	44400000	51400000	20000000	126000000	225000000	89400000	36200000	46400000	49800000	282000000	256000000	210000000	0.33:0.32:0.32:1.32:1.69:0.95:0.35:0.41:0.16:1.00:1.78:0.71:0.29:0.37:0.39:2.23:2.03:1.66	40900000	167000000	38600000	147000000	44100000	249000000	0.28:1.14:0.26:1.00:0.30:1.69	25301	Carbonyl reductase family member 4 OS=Homo sapiens GN=CBR4 PE=1 SV=3
1994	1911	P53004|BIEA_HUMAN	48.77	24	6	6	Carbamidomethylation	785000000	878000000	528000000	841000000	1060000000	573000000	427000000	592000000	334000000	1210000000	830000000	694000000	1150000000	496000000	317000000	1350000000	1470000000	701000000	0.65:0.73:0.44:0.70:0.88:0.47:0.35:0.49:0.28:1.00:0.69:0.57:0.95:0.41:0.26:1.12:1.22:0.58	731000000	825000000	451000000	911000000	1040000000	1170000000	0.80:0.91:0.50:1.00:1.15:1.29	33428	Biliverdin reductase A OS=Homo sapiens GN=BLVRA PE=1 SV=2
939	1614	Q9H6R4|NOL6_HUMAN	48.76	3	3	3	Citrullination	117000000	121000000	80900000	158000000	134000000	94400000	56200000	97400000	57700000	48500000	78800000	47500000	110000000	98500000	90400000	50300000	91100000	48100000	2.42:2.49:1.67:3.26:2.77:1.95:1.16:2.01:1.19:1.00:1.63:0.98:2.27:2.03:1.86:1.04:1.88:0.99	108000000	129000000	75100000	60600000	99700000	63200000	1.78:2.13:1.24:1.00:1.65:1.04	127593	Nucleolar protein 6 OS=Homo sapiens GN=NOL6 PE=1 SV=2
2575	1713	Q9Y487|VPP2_HUMAN	48.62	5	3	3	Oxidation (M); Deamidation (NQ)	189000000	2630000000	1840000000	293000000	164000000	188000000	139000000	2360000000	1730000000	2190000000	2160000000	216000000	110000000	2230000000	1650000000	310000000	301000000	262000000	0.09:1.20:0.84:0.13:0.07:0.09:0.06:1.07:0.79:1.00:0.98:0.10:0.05:1.02:0.75:0.14:0.14:0.12	1550000000	217000000	2070000000	1520000000	1940000000	291000000	1.02:0.14:1.36:1.00:1.28:0.19	98082	V-type proton ATPase 116 kDa subunit a isoform 2 OS=Homo sapiens GN=ATP6V0A2 PE=1 SV=2
1754	1816	P61923|COPZ1_HUMAN	48.55	19	2	2	Acetylation (N-term); Oxidation (M)	1240000000	1200000000	714000000	1140000000	1400000000	1120000000	1410000000	1440000000	1380000000	1220000000	1720000000	1230000000	770000000	830000000	716000000	1690000000	1180000000	1300000000	1.02:0.98:0.59:0.94:1.15:0.92:1.16:1.19:1.14:1.00:1.41:1.01:0.63:0.68:0.59:1.39:0.97:1.07	1050000000	1220000000	1410000000	1390000000	779000000	1390000000	0.76:0.88:1.01:1.00:0.56:1.00	20198	Coatomer subunit zeta-1 OS=Homo sapiens GN=COPZ1 PE=1 SV=1
957	881	P55735|SEC13_HUMAN	48.55	35	7	7	Carbamidomethylation; Acetylation (N-term); Deamidation (NQ)	965000000	979000000	927000000	1120000000	1370000000	1050000000	1380000000	1320000000	997000000	1230000000	1030000000	1160000000	1390000000	1600000000	1120000000	1650000000	2270000000	1330000000	0.79:0.80:0.76:0.91:1.11:0.85:1.12:1.08:0.81:1.00:0.84:0.95:1.14:1.31:0.91:1.34:1.85:1.08	957000000	1180000000	1230000000	1140000000	1370000000	1750000000	0.84:1.03:1.08:1.00:1.21:1.54	35541	Protein SEC13 homolog OS=Homo sapiens GN=SEC13 PE=1 SV=3
306	985	Q9UKV3|ACINU_HUMAN	48.53	10	9	9	Carbamidomethylation; Acetylation (N-term); Phosphorylation (STY); Oxidation (HW)	436000000	668000000	331000000	557000000	758000000	491000000	427000000	397000000	624000000	296000000	399000000	273000000	634000000	972000000	683000000	1040000000	674000000	902000000	1.48:2.26:1.12:1.88:2.56:1.66:1.44:1.34:2.11:1.00:1.35:0.92:2.15:3.29:2.31:3.53:2.28:3.05	520000000	606000000	536000000	323000000	848000000	873000000	1.61:1.88:1.66:1.00:2.63:2.71	151861	Apoptotic chromatin condensation inducer in the nucleus OS=Homo sapiens GN=ACIN1 PE=1 SV=2
1051	1805	Q69YN4|VIR_HUMAN	48.19	3	4	4	Phosphorylation (STY); Carbamidomethylation	98800000	82600000	71500000	109000000	73800000	83700000	112000000	133000000	69800000	86800000	158000000	53700000	146000000	106000000	92300000	148000000	185000000	128000000	1.14:0.95:0.82:1.26:0.85:0.96:1.29:1.53:0.80:1.00:1.82:0.62:1.68:1.22:1.06:1.70:2.14:1.47	84300000	88800000	105000000	133000000	115000000	156000000	0.64:0.67:0.79:1.00:0.86:1.17	202023	Protein virilizer homolog OS=Homo sapiens GN=KIAA1429 PE=1 SV=2
3436	2042	O95169|NDUB8_HUMAN	48.17	17	2	2		214000000	255000000	193000000	333000000	447000000	220000000	273000000	329000000	227000000	307000000	308000000	262000000	316000000	275000000	280000000	388000000	490000000	327000000	0.70:0.83:0.63:1.09:1.46:0.72:0.89:1.07:0.74:1.00:1.00:0.85:1.03:0.90:0.91:1.26:1.60:1.07	221000000	334000000	276000000	292000000	291000000	402000000	0.75:1.14:0.95:1.00:0.99:1.37	21766	NADH dehydrogenase [ubiquinone] 1 beta subcomplex subunit 8 mitochondrial OS=Homo sapiens GN=NDUFB8 PE=1 SV=1
2270	2105	P20340|RAB6A_HUMAN	48.15	11	2	2	Acetylation (N-term)	170000000	153000000	198000000	318000000	170000000	213000000	220000000	221000000	194000000	481000000	307000000	272000000	177000000	352000000	158000000	312000000	456000000	181000000	0.35:0.32:0.41:0.66:0.35:0.44:0.46:0.46:0.40:1.00:0.64:0.56:0.37:0.73:0.33:0.65:0.95:0.38	179000000	252000000	238000000	353000000	253000000	334000000	0.51:0.71:0.67:1.00:0.72:0.95	23593	Ras-related protein Rab-6A OS=Homo sapiens GN=RAB6A PE=1 SV=3
1728	20484	Q14738|2A5D_HUMAN	47.97	12	4	4		147000000	132000000	88200000	141000000	182000000	102000000	251000000	208000000	139000000	215000000	250000000	126000000	94400000	89100000	55700000	203000000	187000000	136000000	0.68:0.61:0.41:0.66:0.85:0.48:1.17:0.97:0.65:1.00:1.16:0.58:0.44:0.41:0.26:0.94:0.87:0.63	122000000	142000000	199000000	197000000	82800000	176000000	0.62:0.72:1.01:1.00:0.42:0.89	69992	Serine/threonine-protein phosphatase 2A 56 kDa regulatory subunit delta isoform OS=Homo sapiens GN=PPP2R5D PE=1 SV=1
126	43	P09874|PARP1_HUMAN	47.95	24	21	21	Acetylation (N-term); Deamidation (NQ); Carbamidomethylation; Pyro-glu from Q; Oxidation (M)	2270000000	1830000000	1900000000	2950000000	2620000000	1510000000	1130000000	2660000000	1110000000	2210000000	2400000000	1530000000	3490000000	3440000000	1980000000	3490000000	3110000000	1940000000	1.03:0.83:0.86:1.34:1.19:0.68:0.51:1.20:0.50:1.00:1.09:0.69:1.58:1.56:0.90:1.58:1.41:0.88	2160000000	2390000000	1630000000	2090000000	2970000000	2970000000	1.04:1.14:0.78:1.00:1.42:1.42	113084	Poly [ADP-ribose] polymerase 1 OS=Homo sapiens GN=PARP1 PE=1 SV=4
537	599	P26368|U2AF2_HUMAN	47.83	19	9	8	Carbamidomethylation; Acetylation (N-term); Phosphorylation (STY); Citrullination	3970000000	4220000000	2800000000	3670000000	4170000000	2680000000	3710000000	4610000000	3400000000	5120000000	6160000000	3710000000	6050000000	6930000000	4780000000	6410000000	7810000000	5760000000	0.77:0.82:0.55:0.72:0.81:0.52:0.72:0.90:0.66:1.00:1.20:0.72:1.18:1.35:0.93:1.25:1.52:1.13	3830000000	3740000000	3910000000	5020000000	5920000000	6660000000	0.76:0.75:0.78:1.00:1.18:1.33	53501	Splicing factor U2AF 65 kDa subunit OS=Homo sapiens GN=U2AF2 PE=1 SV=4
2351	10344	Q9H6E5|STPAP_HUMAN	47.79	3	2	2	Deamidation (NQ); Phosphorylation (STY); Acetylation (N-term)	21400000	31700000	15600000	129000000	15000000	136000000	21400000	37600000	17400000	53800000	80800000	30600000	31200000	237000000	17200000	28500000	32400000	18300000	0.40:0.59:0.29:2.40:0.28:2.53:0.40:0.70:0.32:1.00:1.50:0.57:0.58:4.40:0.32:0.53:0.60:0.34	22900000	129000000	25500000	55000000	236000000	26400000	0.42:2.35:0.46:1.00:4.30:0.48	93847	Speckle targeted PIP5K1A-regulated poly(A) polymerase OS=Homo sapiens GN=TUT1 PE=1 SV=2
1034	1539	O14617|AP3D1_HUMAN	47.77	7	5	5	Carbamidomethylation	381000000	277000000	212000000	544000000	802000000	567000000	404000000	314000000	335000000	385000000	435000000	353000000	286000000	143000000	202000000	432000000	329000000	397000000	0.99:0.72:0.55:1.41:2.08:1.47:1.05:0.81:0.87:1.00:1.13:0.92:0.74:0.37:0.52:1.12:0.85:1.03	290000000	638000000	351000000	391000000	237000000	386000000	0.74:1.63:0.90:1.00:0.61:0.99	130158	AP-3 complex subunit delta-1 OS=Homo sapiens GN=AP3D1 PE=1 SV=1
2615	2878	Q92604|LGAT1_HUMAN	47.76	12	3	3		247000000	187000000	205000000	254000000	319000000	249000000	397000000	238000000	293000000	347000000	307000000	277000000	305000000	316000000	219000000	464000000	382000000	313000000	0.71:0.54:0.59:0.73:0.92:0.72:1.14:0.69:0.84:1.00:0.89:0.80:0.88:0.91:0.63:1.34:1.10:0.90	213000000	274000000	315000000	310000000	280000000	386000000	0.69:0.88:1.02:1.00:0.90:1.25	43089	Acyl-CoA:lysophosphatidylglycerol acyltransferase 1 OS=Homo sapiens GN=LPGAT1 PE=1 SV=1
3545	2652	P04179|SODM_HUMAN	47.69	13	2	2		131000000	95300000	108000000	119000000	118000000	91100000	126000000	94000000	0	184000000	84100000	148000000	105000000	122000000	81300000	357000000	336000000	198000000	0.71:0.52:0.59:0.65:0.64:0.50:0.68:0.51:0:1.00:0.46:0.80:0.57:0.66:0.44:1.94:1.82:1.08	111000000	109000000	110000000	139000000	103000000	297000000	0.80:0.79:0.79:1.00:0.74:2.14	24722	Superoxide dismutase [Mn] mitochondrial OS=Homo sapiens GN=SOD2 PE=1 SV=2
716	358	Q13347|EIF3I_HUMAN	47.59	19	6	6	Pyro-glu from Q; Acetylation (N-term); Deamidation (NQ)	890000000	956000000	611000000	798000000	1020000000	451000000	867000000	715000000	524000000	1180000000	1090000000	556000000	889000000	784000000	442000000	1840000000	2010000000	606000000	0.75:0.81:0.52:0.67:0.86:0.38:0.73:0.60:0.44:1.00:0.92:0.47:0.75:0.66:0.37:1.56:1.69:0.51	819000000	787000000	702000000	944000000	705000000	1570000000	0.87:0.83:0.74:1.00:0.75:1.66	36502	Eukaryotic translation initiation factor 3 subunit I OS=Homo sapiens GN=EIF3I PE=1 SV=1
471	829	A5YKK6|CNOT1_HUMAN	47.58	6	10	10	Carbamidomethylation; Pyro-glu from Q; Deamidation (NQ)	447000000	478000000	377000000	353000000	313000000	256000000	565000000	633000000	475000000	540000000	534000000	381000000	574000000	591000000	448000000	756000000	571000000	539000000	0.83:0.88:0.70:0.65:0.58:0.47:1.05:1.17:0.88:1.00:0.99:0.71:1.06:1.09:0.83:1.40:1.06:1.00	434000000	340000000	558000000	485000000	538000000	659000000	0.89:0.70:1.15:1.00:1.11:1.36	266937	CCR4-NOT transcription complex subunit 1 OS=Homo sapiens GN=CNOT1 PE=1 SV=2
1372	2191	Q9NQX3|GEPH_HUMAN	47.55	15	7	7	Acetylation (N-term); Carbamidomethylation	230000000	338000000	223000000	422000000	682000000	326000000	258000000	187000000	407000000	330000000	442000000	338000000	389000000	725000000	200000000	446000000	551000000	457000000	0.70:1.02:0.67:1.28:2.06:0.99:0.78:0.57:1.23:1.00:1.34:1.03:1.18:2.20:0.61:1.35:1.67:1.38	365000000	476000000	401000000	450000000	563000000	516000000	0.81:1.06:0.89:1.00:1.25:1.15	79748	Gephyrin OS=Homo sapiens GN=GPHN PE=1 SV=1
1367	1653	P48960|CD97_HUMAN	47.52	9	5	5	Carbamidomethylation	591000000	560000000	503000000	547000000	609000000	553000000	742000000	785000000	539000000	644000000	821000000	488000000	852000000	913000000	602000000	1230000000	916000000	854000000	0.92:0.87:0.78:0.85:0.95:0.86:1.15:1.22:0.84:1.00:1.27:0.76:1.32:1.42:0.93:1.91:1.42:1.33	551000000	570000000	711000000	651000000	789000000	1000000000	0.85:0.87:1.09:1.00:1.21:1.54	91869	CD97 antigen OS=Homo sapiens GN=CD97 PE=1 SV=4
825	1316	Q9Y5A9|YTHD2_HUMAN	47.44	19	6	5	Deamidation (NQ); Carbamidomethylation	313000000	206000000	219000000	345000000	365000000	280000000	462000000	371000000	425000000	414000000	418000000	326000000	431000000	506000000	289000000	510000000	407000000	420000000	0.76:0.50:0.53:0.83:0.88:0.68:1.12:0.90:1.03:1.00:1.01:0.79:1.04:1.22:0.70:1.23:0.98:1.01	280000000	330000000	419000000	392000000	409000000	446000000	0.71:0.84:1.07:1.00:1.04:1.14	62334	YTH domain-containing family protein 2 OS=Homo sapiens GN=YTHDF2 PE=1 SV=2
1271	1229	P61353|RL27_HUMAN	47.39	36	4	4	Deamidation (NQ); Acetylation (N-term)	3270000000	3340000000	1490000000	6220000000	5070000000	2340000000	2200000000	3110000000	2210000000	4170000000	6050000000	2700000000	3910000000	3990000000	2320000000	5360000000	5840000000	3160000000	0.78:0.80:0.36:1.49:1.22:0.56:0.53:0.75:0.53:1.00:1.45:0.65:0.94:0.96:0.56:1.28:1.40:0.76	3090000000	5210000000	2670000000	4400000000	3550000000	5220000000	0.70:1.18:0.61:1.00:0.81:1.19	15798	60S ribosomal protein L27 OS=Homo sapiens GN=RPL27 PE=1 SV=2
4059	14923	Q9UBW8|CSN7A_HUMAN	47.35	13	3	2		202000000	210000000	95100000	128000000	163000000	59900000	145000000	234000000	50500000	193000000	384000000	178000000	271000000	396000000	244000000	447000000	394000000	331000000	1.05:1.09:0.49:0.66:0.84:0.31:0.75:1.21:0.26:1.00:1.99:0.92:1.41:2.05:1.26:2.32:2.04:1.72	200000000	133000000	184000000	268000000	304000000	391000000	0.74:0.50:0.68:1.00:1.13:1.46	30277	COP9 signalosome complex subunit 7a OS=Homo sapiens GN=COPS7A PE=1 SV=1
1557	715	Q13523|PRP4B_HUMAN	47.29	5	4	4	Carbamidomethylation; Phosphorylation (STY)	126000000	302000000	144000000	145000000	326000000	178000000	298000000	216000000	233000000	255000000	257000000	171000000	208000000	163000000	163000000	404000000	398000000	233000000	0.49:1.19:0.56:0.57:1.28:0.70:1.17:0.85:0.91:1.00:1.01:0.67:0.82:0.64:0.64:1.59:1.56:0.92	254000000	266000000	249000000	254000000	191000000	358000000	1.00:1.05:0.98:1.00:0.75:1.41	116987	Serine/threonine-protein kinase PRP4 homolog OS=Homo sapiens GN=PRPF4B PE=1 SV=3
1074	934	P26373|RL13_HUMAN	47.22	25	7	7	Acetylation (N-term); Deamidation (NQ); Phosphorylation (STY)	1900000000	2340000000	1080000000	3580000000	3710000000	1920000000	2360000000	1580000000	1150000000	2500000000	4190000000	1510000000	1900000000	1870000000	975000000	2360000000	2650000000	1490000000	0.76:0.94:0.43:1.43:1.48:0.77:0.94:0.63:0.46:1.00:1.68:0.61:0.76:0.75:0.39:0.94:1.06:0.60	1770000000	3440000000	2310000000	2730000000	1580000000	2190000000	0.65:1.26:0.85:1.00:0.58:0.80	24261	60S ribosomal protein L13 OS=Homo sapiens GN=RPL13 PE=1 SV=4
2869	1808	Q9NYH9|UTP6_HUMAN	47.15	6	3	3	Acetylation (N-term); Carbamidomethylation; Phosphorylation (STY)	197000000	1990000000	319000000	233000000	357000000	50500000	102000000	77900000	715000000	48800000	113000000	38000000	29900000	49500000	34900000	255000000	1060000000	512000000	4.04:40.77:6.53:4.78:7.32:1.03:2.10:1.60:14.65:1.00:2.32:0.78:0.61:1.01:0.72:5.22:21.66:10.48	835000000	288000000	298000000	110000000	39300000	608000000	7.59:2.62:2.71:1.00:0.36:5.52	70194	U3 small nucleolar RNA-associated protein 6 homolog OS=Homo sapiens GN=UTP6 PE=2 SV=2
2257	1870	P49642|PRI1_HUMAN	47.04	16	4	4	Acetylation (N-term)	230000000	187000000	171000000	142000000	172000000	139000000	73300000	166000000	141000000	150000000	266000000	116000000	80700000	182000000	123000000	449000000	244000000	371000000	1.53:1.24:1.14:0.95:1.14:0.93:0.49:1.11:0.94:1.00:1.77:0.77:0.54:1.21:0.82:2.99:1.62:2.47	196000000	151000000	141000000	177000000	129000000	355000000	1.11:0.85:0.79:1.00:0.73:2.00	49902	DNA primase small subunit OS=Homo sapiens GN=PRIM1 PE=1 SV=1
1038	500	P07384|CAN1_HUMAN	47.02	20	11	11	Carbamidomethylation; Acetylation (N-term)	492000000	646000000	385000000	730000000	583000000	633000000	841000000	876000000	562000000	750000000	428000000	582000000	881000000	732000000	640000000	955000000	1140000000	654000000	0.66:0.86:0.51:0.97:0.78:0.84:1.12:1.17:0.75:1.00:0.57:0.78:1.17:0.98:0.85:1.27:1.52:0.87	508000000	649000000	760000000	618000000	751000000	917000000	0.82:1.05:1.23:1.00:1.21:1.48	81890	Calpain-1 catalytic subunit OS=Homo sapiens GN=CAPN1 PE=1 SV=1
790	511	P05362|ICAM1_HUMAN	47.01	20	7	7	Carbamidomethylation; Phosphorylation (STY)	912000000	928000000	721000000	1900000000	1020000000	945000000	1700000000	1360000000	1010000000	2050000000	1800000000	1090000000	1200000000	1370000000	861000000	1750000000	1680000000	1190000000	0.44:0.45:0.35:0.93:0.50:0.46:0.83:0.66:0.49:1.00:0.88:0.53:0.58:0.67:0.42:0.86:0.82:0.58	854000000	1290000000	1360000000	1650000000	1140000000	1540000000	0.52:0.78:0.82:1.00:0.69:0.94	57825	Intercellular adhesion molecule 1 OS=Homo sapiens GN=ICAM1 PE=1 SV=2
859	1343	Q13177|PAK2_HUMAN	46.97	29	9	6	Acetylation (N-term); Deamidation (NQ); Phosphorylation (STY)	518000000	564000000	337000000	977000000	706000000	791000000	399000000	571000000	400000000	657000000	582000000	492000000	578000000	636000000	486000000	572000000	822000000	459000000	0.79:0.86:0.51:1.49:1.07:1.20:0.61:0.87:0.61:1.00:0.89:0.75:0.88:0.97:0.74:0.87:1.25:0.70	473000000	825000000	503000000	577000000	567000000	618000000	0.82:1.43:0.87:1.00:0.98:1.07	58043	Serine/threonine-protein kinase PAK 2 OS=Homo sapiens GN=PAK2 PE=1 SV=3
1390	1254	P32455|GBP1_HUMAN	46.87	5	3	3	Carbamidomethylation; Acetylation (N-term)	452000000	436000000	415000000	603000000	678000000	344000000	448000000	508000000	393000000	477000000	506000000	370000000	465000000	432000000	372000000	823000000	928000000	602000000	0.95:0.91:0.87:1.26:1.42:0.72:0.94:1.06:0.82:1.00:1.06:0.78:0.97:0.91:0.78:1.72:1.94:1.26	435000000	542000000	450000000	451000000	423000000	784000000	0.96:1.20:1.00:1.00:0.94:1.74	67931	Guanylate-binding protein 1 OS=Homo sapiens GN=GBP1 PE=1 SV=2
710	969	Q13151|ROA0_HUMAN	46.87	20	4	3	Deamidation (NQ)	1850000000	1890000000	1650000000	1570000000	2200000000	1430000000	1330000000	2160000000	1430000000	1460000000	2200000000	1190000000	1630000000	2510000000	1770000000	3710000000	2960000000	3060000000	1.26:1.29:1.13:1.07:1.50:0.98:0.91:1.47:0.98:1.00:1.50:0.81:1.11:1.71:1.21:2.54:2.02:2.09	1830000000	1730000000	1640000000	1620000000	1970000000	3240000000	1.13:1.07:1.01:1.00:1.22:2.00	30841	Heterogeneous nuclear ribonucleoprotein A0 OS=Homo sapiens GN=HNRNPA0 PE=1 SV=1
3207	2370	O43823|AKAP8_HUMAN	46.79	5	2	2		103000000	138000000	73900000	219000000	212000000	175000000	238000000	179000000	81000000	140000000	186000000	105000000	164000000	168000000	138000000	179000000	247000000	142000000	0.74:0.99:0.53:1.57:1.52:1.25:1.71:1.29:0.58:1.00:1.33:0.75:1.17:1.20:0.99:1.28:1.77:1.02	105000000	202000000	166000000	144000000	157000000	189000000	0.73:1.41:1.16:1.00:1.09:1.32	76108	A-kinase anchor protein 8 OS=Homo sapiens GN=AKAP8 PE=1 SV=1
714	574	P51858|HDGF_HUMAN	46.79	47	7	7	Deamidation (NQ); Phosphorylation (STY); Acetylation (N-term); Carbamidomethylation	1600000000	1620000000	1460000000	1860000000	2760000000	1910000000	1370000000	1910000000	1460000000	1700000000	2690000000	1500000000	1870000000	2720000000	1830000000	3370000000	2650000000	2410000000	0.94:0.95:0.86:1.09:1.62:1.12:0.80:1.12:0.86:1.00:1.58:0.88:1.10:1.60:1.07:1.98:1.56:1.41	1560000000	2180000000	1890000000	1970000000	2140000000	2850000000	0.79:1.11:0.96:1.00:1.09:1.45	26788	Hepatoma-derived growth factor OS=Homo sapiens GN=HDGF PE=1 SV=1
1345	1593	Q9UNP9|PPIE_HUMAN	46.74	21	8	4	Carbamidomethylation; Oxidation (M); Deamidation (NQ)	557000000	262000000	128000000	805000000	752000000	170000000	539000000	190000000	103000000	408000000	395000000	297000000	271000000	213000000	149000000	444000000	465000000	350000000	1.36:0.64:0.31:1.97:1.84:0.42:1.32:0.47:0.25:1.00:0.97:0.73:0.66:0.52:0.37:1.09:1.14:0.86	377000000	688000000	544000000	454000000	215000000	539000000	0.83:1.51:1.20:1.00:0.47:1.19	33431	Peptidyl-prolyl cis-trans isomerase E OS=Homo sapiens GN=PPIE PE=1 SV=1
558	771	P52565|GDIR1_HUMAN	46.71	51	11	11	Acetylation (N-term); Deamidation (NQ); Pyro-glu from Q	4350000000	5220000000	3050000000	4880000000	5350000000	5120000000	4600000000	6210000000	4100000000	5420000000	6030000000	4910000000	6790000000	6210000000	5620000000	7780000000	9410000000	5560000000	0.80:0.96:0.56:0.90:0.99:0.94:0.85:1.15:0.76:1.00:1.11:0.91:1.25:1.15:1.04:1.44:1.74:1.03	4210000000	5110000000	5060000000	5450000000	6210000000	7580000000	0.77:0.94:0.93:1.00:1.14:1.39	23207	Rho GDP-dissociation inhibitor 1 OS=Homo sapiens GN=ARHGDIA PE=1 SV=3
3438	2263	Q15427|SF3B4_HUMAN	46.7	5	2	2	Deamidation (NQ); Acetylation (N-term); Phosphorylation (STY)	357000000	622000000	418000000	1890000	417000000	408000000	20400000	20400000	8520000	918000000	1020000000	551000000	401000000	585000000	0	657000000	852000000	1010000000	0.39:0.68:0.45:0.02:0.45:0.44:0.02:0.02:0.02:1.00:1.11:0.60:0.44:0.64:0:0.72:0.93:1.10	466000000	413000000	16400000	830000000	493000000	840000000	0.56:0.50:0.02:1.00:0.59:1.01	44386	Splicing factor 3B subunit 4 OS=Homo sapiens GN=SF3B4 PE=1 SV=1
989	1662	Q8TD19|NEK9_HUMAN	46.66	10	6	6	Carbamidomethylation	612000000	553000000	455000000	525000000	336000000	181000000	484000000	746000000	647000000	664000000	828000000	519000000	501000000	764000000	482000000	842000000	722000000	704000000	0.92:0.83:0.69:0.79:0.51:0.27:0.73:1.12:0.97:1.00:1.25:0.78:0.76:1.15:0.73:1.27:1.09:1.06	540000000	539000000	626000000	670000000	621000000	756000000	0.81:0.80:0.93:1.00:0.93:1.13	107168	Serine/threonine-protein kinase Nek9 OS=Homo sapiens GN=NEK9 PE=1 SV=2
1996	1421	P01920|DQB1_HUMAN	46.66	9	3	3	Acetylation (N-term); Citrullination	2270000000	2460000000	1280000000	4590000000	3040000000	2670000000	1690000000	2540000000	1490000000	2260000000	1450000000	2070000000	2250000000	1500000000	1600000000	1960000000	2520000000	1440000000	1.01:1.09:0.57:2.03:1.35:1.18:0.75:1.13:0.66:1.00:0.64:0.91:0.99:0.66:0.71:0.87:1.12:0.64	2000000000	3440000000	1910000000	1930000000	1780000000	1980000000	1.04:1.78:0.99:1.00:0.93:1.03	29991	HLA class II histocompatibility antigen DQ beta 1 chain OS=Homo sapiens GN=HLA-DQB1 PE=1 SV=2
434	549	P14735|IDE_HUMAN	46.63	15	13	13	Carbamidomethylation; Deamidation (NQ)	642000000	518000000	557000000	623000000	737000000	647000000	1120000000	433000000	705000000	840000000	688000000	621000000	743000000	877000000	590000000	1220000000	1130000000	743000000	0.76:0.62:0.66:0.74:0.88:0.77:1.33:0.51:0.84:1.00:0.82:0.74:0.88:1.04:0.70:1.46:1.34:0.88	572000000	669000000	1020000000	716000000	736000000	1030000000	0.80:0.93:1.43:1.00:1.03:1.44	117968	Insulin-degrading enzyme OS=Homo sapiens GN=IDE PE=1 SV=4
212	260	P27348|1433T_HUMAN	46.62	43	10	8	Carbamidomethylation; Acetylation (N-term); Deamidation (NQ); Pyro-glu from Q	3270000000	3130000000	3060000000	5660000000	5490000000	5110000000	7640000000	4100000000	5230000000	5740000000	5100000000	4570000000	5390000000	6890000000	4780000000	6210000000	5980000000	4670000000	0.57:0.55:0.53:0.99:0.96:0.89:1.33:0.71:0.91:1.00:0.89:0.80:0.94:1.20:0.83:1.08:1.04:0.81	3160000000	5480000000	5660000000	5140000000	5690000000	5650000000	0.61:1.07:1.10:1.00:1.11:1.10	27764	14-3-3 protein theta OS=Homo sapiens GN=YWHAQ PE=1 SV=1
737	425	O94776|MTA2_HUMAN	46.61	19	10	7	Pyro-glu from Q; Deamidation (NQ); Citrullination	1210000000	1050000000	889000000	1600000000	1340000000	982000000	519000000	1180000000	486000000	1260000000	1460000000	869000000	1220000000	974000000	855000000	1150000000	945000000	857000000	0.96:0.83:0.71:1.28:1.07:0.78:0.41:0.94:0.39:1.00:1.16:0.69:0.97:0.78:0.68:0.92:0.75:0.68	1050000000	1310000000	862000000	1200000000	1020000000	985000000	0.88:1.09:0.72:1.00:0.85:0.82	75023	Metastasis-associated protein MTA2 OS=Homo sapiens GN=MTA2 PE=1 SV=1
96	22	P50990|TCPQ_HUMAN	46.6	52	27	27	Carbamidomethylation; Acetylation (N-term); Deamidation (NQ); Oxidation (M); Pyro-glu from Q	5730000000	6060000000	5210000000	8800000000	9240000000	5870000000	8810000000	6790000000	5170000000	6790000000	7240000000	5320000000	6200000000	6250000000	4600000000	11700000000	11100000000	7820000000	0.84:0.89:0.77:1.30:1.36:0.86:1.30:1.00:0.76:1.00:1.07:0.78:0.91:0.92:0.68:1.72:1.64:1.15	5670000000	7970000000	7100000000	6650000000	5680000000	10400000000	0.85:1.20:1.07:1.00:0.85:1.56	59621	T-complex protein 1 subunit theta OS=Homo sapiens GN=CCT8 PE=1 SV=4
1322	1385	P84095|RHOG_HUMAN	46.41	40	6	6	Acetylation (N-term); Deamidation (NQ); Carbamidomethylation	390000000	464000000	413000000	424000000	463000000	431000000	1110000000	655000000	610000000	591000000	676000000	694000000	663000000	249000000	436000000	302000000	694000000	615000000	0.66:0.79:0.70:0.72:0.78:0.73:1.87:1.11:1.03:1.00:1.14:1.17:1.12:0.42:0.74:0.51:1.17:1.04	422000000	445000000	790000000	654000000	449000000	662000000	0.65:0.68:1.21:1.00:0.69:1.01	21308	Rho-related GTP-binding protein RhoG OS=Homo sapiens GN=RHOG PE=1 SV=1
2467	2102	P34949|MPI_HUMAN	46.41	17	4	4	Carbamidomethylation; Pyro-glu from Q	155000000	45300000	193000000	81600000	234000000	141000000	98800000	152000000	61700000	267000000	68100000	64900000	106000000	163000000	213000000	310000000	414000000	200000000	0.58:0.17:0.72:0.31:0.88:0.53:0.37:0.57:0.23:1.00:0.25:0.24:0.40:0.61:0.80:1.16:1.55:0.75	216000000	152000000	104000000	285000000	222000000	308000000	0.76:0.53:0.37:1.00:0.78:1.08	46656	Mannose-6-phosphate isomerase OS=Homo sapiens GN=MPI PE=1 SV=2
58	83	Q13263|TIF1B_HUMAN	46.34	51	25	25	Carbamidomethylation; Deamidation (NQ); Acetylation (N-term); Phosphorylation (STY); Citrullination; 2 more	3270000000	2840000000	2060000000	3070000000	2560000000	2600000000	3670000000	5810000000	3680000000	5740000000	5430000000	5280000000	4120000000	4560000000	3290000000	4700000000	4790000000	5190000000	0.57:0.49:0.36:0.53:0.45:0.45:0.64:1.01:0.64:1.00:0.95:0.92:0.72:0.79:0.57:0.82:0.83:0.90	2890000000	2870000000	4770000000	6110000000	4150000000	5240000000	0.47:0.47:0.78:1.00:0.68:0.86	88550	Transcription intermediary factor 1-beta OS=Homo sapiens GN=TRIM28 PE=1 SV=5
1336	1438	Q9Y6H1|CHCH2_HUMAN	46.32	34	5	5	Carbamidomethylation; Pyro-glu from Q; Deamidation (NQ); Acetylation (N-term)	1290000000	1380000000	630000000	2270000000	1250000000	1840000000	782000000	868000000	606000000	2440000000	2960000000	2250000000	1890000000	1210000000	958000000	1030000000	1720000000	668000000	0.53:0.57:0.26:0.93:0.51:0.75:0.32:0.36:0.25:1.00:1.21:0.92:0.77:0.49:0.39:0.42:0.70:0.27	1120000000	1790000000	763000000	2560000000	1360000000	1140000000	0.44:0.70:0.30:1.00:0.53:0.45	15513	Coiled-coil-helix-coiled-coil-helix domain-containing protein 2 OS=Homo sapiens GN=CHCHD2 PE=1 SV=1
1075	917	P43034|LIS1_HUMAN	46.22	15	4	4	Carbamidomethylation; Deamidation (NQ)	1380000000	1440000000	933000000	2080000000	1980000000	1330000000	1580000000	1530000000	1530000000	2000000000	1800000000	1540000000	1950000000	1600000000	1210000000	2260000000	2800000000	1680000000	0.69:0.72:0.47:1.04:0.99:0.66:0.79:0.76:0.77:1.00:0.90:0.77:0.97:0.80:0.61:1.13:1.40:0.84	1250000000	1800000000	1670000000	1780000000	1590000000	2250000000	0.70:1.01:0.94:1.00:0.89:1.26	46638	Platelet-activating factor acetylhydrolase IB subunit alpha OS=Homo sapiens GN=PAFAH1B1 PE=1 SV=2
3851	2739	Q9NUQ2|PLCE_HUMAN	46.19	3	1	1		60900000	51400000	0	164000000	57000000	0	122000000	146000000	101000000	163000000	181000000	117000000	18800000	117000000	82100000	382000000	326000000	255000000	0.37:0.32:0:1.01:0.35:0:0.75:0.90:0.62:1.00:1.11:0.72:0.12:0.72:0.51:2.35:2.01:1.57	56100000	166000000	132000000	154000000	98700000	321000000	0.37:1.08:0.86:1.00:0.64:2.09	42072	1-acyl-sn-glycerol-3-phosphate acyltransferase epsilon OS=Homo sapiens GN=AGPAT5 PE=1 SV=3
599	628	Q8IY67|RAVR1_HUMAN	46.15	18	6	6	Carbamidomethylation; Phosphorylation (STY)	802000000	771000000	665000000	1040000000	1280000000	762000000	512000000	789000000	418000000	884000000	1610000000	726000000	677000000	1140000000	681000000	1400000000	1230000000	1280000000	0.91:0.87:0.75:1.18:1.45:0.86:0.58:0.89:0.47:1.00:1.82:0.82:0.77:1.29:0.77:1.58:1.39:1.45	746000000	1030000000	678000000	1070000000	832000000	1300000000	0.70:0.96:0.63:1.00:0.78:1.21	63877	Ribonucleoprotein PTB-binding 1 OS=Homo sapiens GN=RAVER1 PE=1 SV=1
483	509	P22059|OSBP1_HUMAN	46.09	18	9	8	Carbamidomethylation; Phosphorylation (STY); Acetylation (N-term); Deamidation (NQ); Pyro-glu from Q	537000000	621000000	572000000	965000000	875000000	734000000	1100000000	870000000	687000000	842000000	1020000000	725000000	588000000	562000000	688000000	1170000000	1010000000	921000000	0.64:0.74:0.68:1.15:1.04:0.87:1.30:1.03:0.82:1.00:1.21:0.86:0.70:0.67:0.82:1.39:1.20:1.09	577000000	858000000	885000000	863000000	651000000	1030000000	0.67:0.99:1.03:1.00:0.75:1.20	89421	Oxysterol-binding protein 1 OS=Homo sapiens GN=OSBP PE=1 SV=1
1405	714	Q9Y6Y8|S23IP_HUMAN	46.06	8	8	8	Carbamidomethylation	474000000	560000000	425000000	547000000	772000000	291000000	298000000	314000000	295000000	541000000	192000000	342000000	662000000	539000000	428000000	699000000	694000000	490000000	0.88:1.03:0.79:1.01:1.43:0.54:0.55:0.58:0.55:1.00:0.36:0.63:1.22:1.00:0.79:1.29:1.28:0.91	486000000	608000000	303000000	440000000	543000000	628000000	1.10:1.38:0.69:1.00:1.23:1.43	111076	SEC23-interacting protein OS=Homo sapiens GN=SEC23IP PE=1 SV=1
1515	685	P25685|DNJB1_HUMAN	46.05	24	6	5	Carbamidomethylation; Deamidation (NQ)	661000000	567000000	383000000	637000000	836000000	523000000	273000000	541000000	297000000	658000000	754000000	393000000	726000000	766000000	573000000	930000000	790000000	679000000	1.00:0.86:0.58:0.97:1.27:0.79:0.42:0.82:0.45:1.00:1.14:0.60:1.10:1.16:0.87:1.41:1.20:1.03	577000000	665000000	441000000	635000000	689000000	800000000	0.91:1.05:0.69:1.00:1.09:1.26	38044	DnaJ homolog subfamily B member 1 OS=Homo sapiens GN=DNAJB1 PE=1 SV=4
3189	2031	O43504|LTOR5_HUMAN	45.98	64	3	3	Acetylation (N-term); Carbamidomethylation	595000000	545000000	461000000	671000000	742000000	481000000	614000000	780000000	577000000	800000000	782000000	626000000	659000000	868000000	627000000	1050000000	985000000	836000000	0.74:0.68:0.58:0.84:0.93:0.60:0.77:0.97:0.72:1.00:0.98:0.78:0.82:1.08:0.78:1.31:1.23:1.04	534000000	631000000	657000000	736000000	730000000	957000000	0.73:0.86:0.89:1.00:0.99:1.30	9614	Ragulator complex protein LAMTOR5 OS=Homo sapiens GN=LAMTOR5 PE=1 SV=1
489	860	Q86V81|THOC4_HUMAN	45.89	28	8	7	Acetylation (N-term); Deamidation (NQ); Pyro-glu from Q; Citrullination	2190000000	1950000000	2100000000	2240000000	2470000000	2040000000	3670000000	3040000000	2940000000	3390000000	2750000000	2430000000	3740000000	2950000000	2580000000	3850000000	4030000000	3290000000	0.64:0.57:0.62:0.66:0.73:0.60:1.08:0.90:0.87:1.00:0.81:0.72:1.10:0.87:0.76:1.14:1.19:0.97	2140000000	2280000000	3240000000	2860000000	3090000000	3800000000	0.75:0.80:1.13:1.00:1.08:1.33	26888	THO complex subunit 4 OS=Homo sapiens GN=ALYREF PE=1 SV=3
1117	1033	Q9H9B4|SFXN1_HUMAN	45.87	36	9	8	Acetylation (N-term); Pyro-glu from Q; Deamidation (NQ); Carbamidomethylation	1140000000	1360000000	836000000	903000000	1230000000	1260000000	1580000000	1420000000	880000000	987000000	1320000000	811000000	828000000	711000000	627000000	1480000000	1020000000	1240000000	1.16:1.38:0.85:0.92:1.25:1.28:1.60:1.44:0.89:1.00:1.34:0.82:0.84:0.72:0.64:1.50:1.04:1.25	1110000000	1130000000	1290000000	1040000000	722000000	1250000000	1.07:1.09:1.24:1.00:0.69:1.20	35619	Sideroflexin-1 OS=Homo sapiens GN=SFXN1 PE=1 SV=4
1628	7751	P06493|CDK1_HUMAN	45.82	20	4	3	Phosphorylation (STY)	260000000	245000000	173000000	290000000	491000000	215000000	231000000	203000000	164000000	305000000	304000000	244000000	196000000	229000000	120000000	474000000	409000000	333000000	0.85:0.80:0.57:0.95:1.61:0.71:0.76:0.67:0.54:1.00:0.99:0.80:0.64:0.75:0.39:1.55:1.34:1.09	226000000	332000000	213000000	285000000	182000000	405000000	0.80:1.17:0.75:1.00:0.64:1.42	34095	Cyclin-dependent kinase 1 OS=Homo sapiens GN=CDK1 PE=1 SV=3
298	133	P02786|TFR1_HUMAN	45.8	33	19	19	Carbamidomethylation; Deamidation (NQ); Acetylation (N-term)	1700000000	1780000000	1320000000	2120000000	2390000000	1470000000	1370000000	1180000000	787000000	1750000000	1890000000	1330000000	1190000000	1240000000	845000000	1750000000	1690000000	959000000	0.97:1.02:0.75:1.22:1.37:0.84:0.78:0.68:0.45:1.00:1.09:0.76:0.68:0.71:0.48:1.00:0.97:0.55	1600000000	1990000000	1110000000	1660000000	1090000000	1710000000	0.96:1.20:0.67:1.00:0.66:1.03	84871	Transferrin receptor protein 1 OS=Homo sapiens GN=TFRC PE=1 SV=2
1940	2174	Q9NXE4|NSMA3_HUMAN	45.56	4	2	2	Acetylation (N-term); Carbamidomethylation	213000000	210000000	159000000	162000000	253000000	138000000	208000000	284000000	176000000	209000000	308000000	199000000	279000000	307000000	205000000	389000000	326000000	325000000	1.02:1.00:0.76:0.78:1.21:0.66:1.00:1.36:0.84:1.00:1.47:0.95:1.34:1.47:0.98:1.86:1.56:1.56	194000000	184000000	223000000	239000000	264000000	347000000	0.81:0.77:0.93:1.00:1.10:1.45	93352	Sphingomyelin phosphodiesterase 4 OS=Homo sapiens GN=SMPD4 PE=1 SV=2
2127	1755	Q9BX68|HINT2_HUMAN	45.56	9	1	1	Acetylation (N-term); Deamidation (NQ)	522000000	442000000	325000000	405000000	654000000	254000000	136000000	433000000	165000000	213000000	400000000	117000000	213000000	475000000	234000000	651000000	473000000	404000000	2.44:2.07:1.52:1.90:3.07:1.19:0.64:2.03:0.77:1.00:1.88:0.55:1.00:2.23:1.10:3.05:2.22:1.89	429000000	438000000	245000000	244000000	308000000	509000000	1.76:1.80:1.00:1.00:1.26:2.09	17162	Histidine triad nucleotide-binding protein 2 mitochondrial OS=Homo sapiens GN=HINT2 PE=1 SV=1
1319	1400	Q96QK1|VPS35_HUMAN	45.56	9	5	5	Acetylation (N-term); Deamidation (NQ)	386000000	377000000	336000000	361000000	581000000	357000000	276000000	372000000	347000000	501000000	628000000	351000000	430000000	463000000	278000000	775000000	680000000	510000000	0.77:0.75:0.67:0.72:1.16:0.71:0.55:0.74:0.69:1.00:1.25:0.70:0.86:0.92:0.56:1.55:1.36:1.02	366000000	433000000	332000000	493000000	404000000	655000000	0.74:0.88:0.67:1.00:0.82:1.33	91707	Vacuolar protein sorting-associated protein 35 OS=Homo sapiens GN=VPS35 PE=1 SV=2
1106	1313	Q06203|PUR1_HUMAN	45.51	15	6	6	Carbamidomethylation	490000000	510000000	400000000	829000000	715000000	601000000	467000000	438000000	295000000	736000000	674000000	515000000	624000000	662000000	450000000	850000000	953000000	537000000	0.67:0.69:0.54:1.13:0.97:0.82:0.63:0.60:0.40:1.00:0.92:0.70:0.85:0.90:0.61:1.15:1.29:0.73	486000000	789000000	452000000	642000000	579000000	780000000	0.76:1.23:0.71:1.00:0.90:1.22	57399	Amidophosphoribosyltransferase OS=Homo sapiens GN=PPAT PE=1 SV=1
275	347	Q15393|SF3B3_HUMAN	45.44	16	17	17	Carbamidomethylation	1240000000	1080000000	872000000	1380000000	1290000000	914000000	1530000000	1590000000	1340000000	1260000000	1170000000	999000000	1420000000	1450000000	1070000000	2010000000	2090000000	1590000000	0.98:0.86:0.69:1.09:1.03:0.73:1.22:1.26:1.06:1.00:0.93:0.79:1.13:1.15:0.85:1.60:1.66:1.27	1060000000	1190000000	1490000000	1140000000	1310000000	1920000000	0.93:1.05:1.30:1.00:1.15:1.68	135577	Splicing factor 3B subunit 3 OS=Homo sapiens GN=SF3B3 PE=1 SV=4
1198	1682	Q9BVJ6|UT14A_HUMAN	45.28	8	4	4	Carbamidomethylation	265000000	303000000	274000000	356000000	463000000	282000000	305000000	382000000	284000000	241000000	369000000	152000000	323000000	385000000	276000000	545000000	564000000	393000000	1.10:1.25:1.14:1.48:1.92:1.17:1.26:1.58:1.18:1.00:1.53:0.63:1.34:1.60:1.15:2.26:2.34:1.63	308000000	367000000	324000000	254000000	328000000	501000000	1.21:1.44:1.27:1.00:1.29:1.97	87978	U3 small nucleolar RNA-associated protein 14 homolog A OS=Homo sapiens GN=UTP14A PE=1 SV=1
2726	1498	Q969S3|ZN622_HUMAN	45.14	9	3	3	Carbamidomethylation; Acetylation (N-term)	225000000	264000000	140000000	237000000	169000000	148000000	207000000	319000000	197000000	306000000	197000000	177000000	280000000	258000000	200000000	393000000	463000000	264000000	0.73:0.86:0.46:0.78:0.55:0.48:0.68:1.04:0.65:1.00:0.64:0.58:0.91:0.84:0.65:1.28:1.52:0.86	209000000	185000000	241000000	248000000	246000000	373000000	0.84:0.74:0.97:1.00:0.99:1.50	54272	Zinc finger protein 622 OS=Homo sapiens GN=ZNF622 PE=1 SV=1
2050	2696	Q92541|RTF1_HUMAN	45.14	4	2	2		112000000	136000000	123000000	106000000	170000000	95400000	163000000	171000000	158000000	175000000	130000000	135000000	198000000	168000000	139000000	269000000	229000000	209000000	0.64:0.77:0.70:0.61:0.97:0.54:0.93:0.97:0.90:1.00:0.74:0.77:1.13:0.96:0.80:1.53:1.31:1.19	123000000	124000000	165000000	147000000	168000000	237000000	0.84:0.85:1.12:1.00:1.15:1.62	80314	RNA polymerase-associated protein RTF1 homolog OS=Homo sapiens GN=RTF1 PE=1 SV=4
4883	10499	P05026|AT1B1_HUMAN	45.13	10	2	2	Carbamidomethylation	75700000	92800000	55300000	195000000	59600000	81400000	35100000	39800000	15300000	17600000	25300000	12500000	80100000	83600000	70700000	39600000	51200000	26100000	4.29:5.26:3.13:11.09:3.38:4.62:1.99:2.26:0.87:1.00:1.43:0.71:4.54:4.75:4.01:2.25:2.90:1.48	74600000	112000000	30100000	18500000	78100000	44700000	4.04:6.07:1.63:1.00:4.23:2.42	35061	Sodium/potassium-transporting ATPase subunit beta-1 OS=Homo sapiens GN=ATP1B1 PE=1 SV=1
2996	1988	Q15287|RNPS1_HUMAN	45.11	12	3	3		504000000	411000000	415000000	681000000	523000000	615000000	697000000	557000000	491000000	585000000	556000000	486000000	500000000	633000000	452000000	864000000	836000000	669000000	0.86:0.70:0.71:1.16:0.89:1.05:1.19:0.95:0.84:1.00:0.95:0.83:0.85:1.08:0.77:1.48:1.43:1.14	464000000	606000000	594000000	543000000	545000000	810000000	0.85:1.12:1.10:1.00:1.00:1.49	34208	RNA-binding protein with serine-rich domain 1 OS=Homo sapiens GN=RNPS1 PE=1 SV=1
1179	866	O43809|CPSF5_HUMAN	44.94	30	6	5		1950000000	2190000000	1530000000	2270000000	2160000000	1950000000	1240000000	1290000000	1050000000	1790000000	1580000000	1680000000	1550000000	1510000000	1270000000	2510000000	2760000000	1960000000	1.09:1.22:0.85:1.27:1.20:1.09:0.69:0.72:0.59:1.00:0.88:0.94:0.86:0.84:0.71:1.40:1.54:1.10	1890000000	2130000000	1200000000	1690000000	1460000000	2420000000	1.12:1.26:0.71:1.00:0.86:1.44	26227	Cleavage and polyadenylation specificity factor subunit 5 OS=Homo sapiens GN=NUDT21 PE=1 SV=1
2117	1461	Q9BTY7|HGH1_HUMAN	44.94	15	3	3	Acetylation (N-term)	591000000	637000000	451000000	470000000	885000000	728000000	476000000	710000000	490000000	507000000	697000000	455000000	367000000	247000000	330000000	902000000	914000000	655000000	1.17:1.26:0.89:0.93:1.75:1.44:0.94:1.40:0.97:1.00:1.38:0.90:0.72:0.49:0.65:1.78:1.80:1.29	560000000	861000000	559000000	553000000	332000000	960000000	1.01:1.56:1.01:1.00:0.60:1.74	42129	Protein HGH1 homolog OS=Homo sapiens GN=HGH1 PE=1 SV=1
3203	2910	Q6FIF0|ZFAN6_HUMAN	44.9	24	2	2	Carbamidomethylation; Acetylation (N-term)	174000000	160000000	117000000	245000000	266000000	198000000	184000000	206000000	114000000	206000000	284000000	154000000	152000000	163000000	146000000	434000000	434000000	443000000	0.85:0.78:0.57:1.19:1.29:0.96:0.89:1.00:0.55:1.00:1.38:0.75:0.74:0.79:0.71:2.11:2.11:2.15	151000000	237000000	168000000	215000000	154000000	437000000	0.70:1.10:0.78:1.00:0.72:2.04	22555	AN1-type zinc finger protein 6 OS=Homo sapiens GN=ZFAND6 PE=1 SV=2
630	439	O75874|IDHC_HUMAN	44.89	23	8	8	Carbamidomethylation	657000000	800000000	798000000	809000000	1050000000	605000000	1430000000	753000000	874000000	1050000000	798000000	786000000	1190000000	1150000000	829000000	1530000000	1540000000	947000000	0.63:0.76:0.76:0.77:1.00:0.58:1.36:0.72:0.83:1.00:0.76:0.75:1.13:1.10:0.79:1.46:1.47:0.90	799000000	822000000	1060000000	982000000	1060000000	1340000000	0.81:0.84:1.08:1.00:1.08:1.36	46659	Isocitrate dehydrogenase [NADP] cytoplasmic OS=Homo sapiens GN=IDH1 PE=1 SV=2
349	592	P09382|LEG1_HUMAN	44.77	53	10	10	Carbamidomethylation; Acetylation (N-term); Deamidation (NQ)	9990000000	7600000000	8670000000	13100000000	10600000000	8090000000	5950000000	7130000000	4790000000	9440000000	9550000000	6010000000	6160000000	6920000000	4130000000	11700000000	10400000000	7160000000	1.06:0.81:0.92:1.39:1.12:0.86:0.63:0.76:0.51:1.00:1.01:0.64:0.65:0.73:0.44:1.24:1.10:0.76	8850000000	10600000000	8000000000	8330000000	5730000000	9890000000	1.06:1.27:0.96:1.00:0.69:1.19	14716	Galectin-1 OS=Homo sapiens GN=LGALS1 PE=1 SV=2
1047	1184	Q9P2R7|SUCB1_HUMAN	44.73	13	5	5	Carbamidomethylation	570000000	541000000	499000000	715000000	731000000	561000000	562000000	557000000	499000000	780000000	631000000	622000000	517000000	494000000	430000000	1150000000	933000000	776000000	0.73:0.69:0.64:0.92:0.94:0.72:0.72:0.71:0.64:1.00:0.81:0.80:0.66:0.63:0.55:1.48:1.20:0.99	537000000	669000000	561000000	699000000	481000000	986000000	0.77:0.96:0.80:1.00:0.69:1.41	50317	Succinyl-CoA ligase [ADP-forming] subunit beta mitochondrial OS=Homo sapiens GN=SUCLA2 PE=1 SV=3
646	532	P39687|AN32A_HUMAN	44.57	34	11	5	Carbamidomethylation; Acetylation (N-term); Deamidation (NQ); Citrullination	941000000	884000000	543000000	784000000	1200000000	557000000	442000000	1120000000	255000000	861000000	1460000000	652000000	913000000	1430000000	870000000	1360000000	1050000000	882000000	1.09:1.03:0.63:0.91:1.40:0.65:0.51:1.30:0.30:1.00:1.69:0.76:1.06:1.67:1.01:1.58:1.22:1.02	802000000	847000000	751000000	1000000000	1070000000	1200000000	0.80:0.85:0.75:1.00:1.07:1.20	28585	Acidic leucine-rich nuclear phosphoprotein 32 family member A OS=Homo sapiens GN=ANP32A PE=1 SV=1
5175	2498	Q6P3S1|DEN1B_HUMAN	44.51	3	3	2	Carbamidomethylation; Phosphorylation (STY)	150000000	129000000	70700000	111000000	85300000	47700000	166000000	162000000	126000000	293000000	244000000	0	41700000	41700000	10500000	264000000	355000000	103000000	0.51:0.44:0.24:0.38:0.29:0.16:0.57:0.55:0.43:1.00:0.83:0:0.14:0.14:0.04:0.90:1.21:0.35	117000000	81400000	151000000	269000000	31300000	241000000	0.43:0.30:0.56:1.00:0.12:0.90	86552	DENN domain-containing protein 1B OS=Homo sapiens GN=DENND1B PE=1 SV=2
1863	1598	P53384|NUBP1_HUMAN	44.43	6	1	1	Carbamidomethylation; Acetylation (N-term)	116000000	146000000	77600000	254000000	152000000	199000000	68700000	78200000	27400000	31800000	53500000	22900000	120000000	134000000	117000000	57400000	93200000	35400000	3.66:4.59:2.44:8.01:4.78:6.26:2.16:2.46:0.86:1.00:1.69:0.72:3.78:4.21:3.68:1.81:2.94:1.11	113000000	202000000	58100000	36100000	123000000	62000000	3.14:5.59:1.61:1.00:3.42:1.72	34535	Cytosolic Fe-S cluster assembly factor NUBP1 OS=Homo sapiens GN=NUBP1 PE=1 SV=2
114	162	Q12906|ILF3_HUMAN	44.42	34	21	19	Carbamidomethylation; Deamidation (NQ); Oxidation (M); Pyro-glu from E; Acetylation (N-term); Pyro-glu from Q	2410000000	2850000000	2780000000	2920000000	2510000000	2610000000	2880000000	2830000000	3020000000	2830000000	3170000000	2990000000	2450000000	2760000000	2870000000	4240000000	5020000000	5000000000	0.85:1.01:0.98:1.03:0.89:0.92:1.02:1.00:1.07:1.00:1.12:1.06:0.86:0.97:1.01:1.50:1.77:1.77	3010000000	3140000000	3310000000	3510000000	3090000000	5750000000	0.86:0.89:0.94:1.00:0.88:1.63	95339	Interleukin enhancer-binding factor 3 OS=Homo sapiens GN=ILF3 PE=1 SV=3
3618	2697	Q8TAM6|ERMIN_HUMAN	44.38	9	3	1	Phosphorylation (STY); Pyro-glu from Q; Oxidation (HW)	537000000	540000000	211000000	903000000	605000000	685000000	593000000	922000000	452000000	1080000000	574000000	786000000	855000000	601000000	527000000	839000000	907000000	537000000	0.50:0.50:0.20:0.84:0.56:0.64:0.55:0.86:0.42:1.00:0.53:0.73:0.79:0.56:0.49:0.78:0.84:0.50	429000000	731000000	656000000	813000000	661000000	761000000	0.53:0.90:0.81:1.00:0.81:0.94	32783	Ermin OS=Homo sapiens GN=ERMN PE=2 SV=1
1424	1667	Q9NRF8|PYRG2_HUMAN	44.29	9	4	3	Phosphorylation (STY); Carbamidomethylation	103000000	107000000	113000000	166000000	163000000	112000000	74300000	87400000	86800000	162000000	134000000	106000000	95600000	131000000	83200000	141000000	157000000	118000000	0.64:0.66:0.70:1.02:1.00:0.69:0.46:0.54:0.54:1.00:0.83:0.65:0.59:0.81:0.51:0.87:0.97:0.73	107000000	147000000	82800000	134000000	108000000	139000000	0.80:1.10:0.62:1.00:0.81:1.04	65678	CTP synthase 2 OS=Homo sapiens GN=CTPS2 PE=1 SV=1
1436	1029	O75347|TBCA_HUMAN	44.29	34	4	4	Deamidation (NQ); Pyro-glu from Q	2710000000	3130000000	2760000000	3850000000	3570000000	2910000000	1790000000	2220000000	1820000000	2840000000	2530000000	1930000000	3100000000	2690000000	2150000000	4980000000	6640000000	2900000000	0.96:1.10:0.97:1.36:1.26:1.02:0.63:0.78:0.64:1.00:0.89:0.68:1.09:0.95:0.76:1.75:2.34:1.02	2870000000	3440000000	1940000000	2430000000	2650000000	4840000000	1.18:1.41:0.80:1.00:1.09:1.99	12855	Tubulin-specific chaperone A OS=Homo sapiens GN=TBCA PE=1 SV=3
385	1389	O75369|FLNB_HUMAN	44.11	5	10	7	Phosphorylation (STY); Deamidation (NQ)	360000000	330000000	236000000	438000000	241000000	279000000	246000000	183000000	117000000	197000000	405000000	168000000	127000000	200000000	196000000	435000000	295000000	270000000	1.83:1.68:1.20:2.22:1.22:1.42:1.25:0.93:0.59:1.00:2.06:0.86:0.64:1.02:1.00:2.21:1.50:1.37	309000000	319000000	182000000	378000000	210000000	361000000	0.82:0.84:0.48:1.00:0.56:0.96	278162	Filamin-B OS=Homo sapiens GN=FLNB PE=1 SV=2
1162	1290	O95793|STAU1_HUMAN	44.1	13	5	5		387000000	377000000	335000000	276000000	337000000	289000000	343000000	305000000	242000000	539000000	491000000	401000000	441000000	449000000	273000000	610000000	864000000	468000000	0.72:0.70:0.62:0.51:0.63:0.54:0.64:0.57:0.45:1.00:0.91:0.74:0.82:0.83:0.51:1.13:1.60:0.87	366000000	335000000	309000000	477000000	413000000	672000000	0.77:0.70:0.65:1.00:0.87:1.41	63182	Double-stranded RNA-binding protein Staufen homolog 1 OS=Homo sapiens GN=STAU1 PE=1 SV=2
3187	1559	O00483|NDUA4_HUMAN	44.03	27	3	3	Carbamidomethylation	1040000000	1110000000	939000000	902000000	1170000000	807000000	1670000000	1310000000	1230000000	1450000000	1270000000	1250000000	1210000000	1070000000	830000000	1980000000	2110000000	1380000000	0.72:0.76:0.65:0.62:0.81:0.55:1.15:0.90:0.85:1.00:0.87:0.86:0.84:0.73:0.57:1.36:1.45:0.95	1030000000	977000000	1410000000	1320000000	1040000000	1820000000	0.78:0.74:1.06:1.00:0.78:1.38	9370	Cytochrome c oxidase subunit NDUFA4 OS=Homo sapiens GN=NDUFA4 PE=1 SV=1
2314	1868	O00560|SDCB1_HUMAN	44.01	21	4	3	Acetylation (N-term)	239000000	242000000	190000000	338000000	265000000	210000000	167000000	235000000	107000000	408000000	551000000	350000000	302000000	287000000	279000000	462000000	369000000	355000000	0.59:0.59:0.47:0.83:0.65:0.52:0.41:0.58:0.26:1.00:1.35:0.86:0.74:0.70:0.68:1.13:0.90:0.87	224000000	328000000	233000000	451000000	309000000	396000000	0.50:0.73:0.52:1.00:0.68:0.88	32444	Syntenin-1 OS=Homo sapiens GN=SDCBP PE=1 SV=1
1972	2038	Q99805|TM9S2_HUMAN	44.01	8	5	5	Carbamidomethylation; Acetylation (N-term)	884000000	637000000	928000000	637000000	807000000	633000000	477000000	356000000	601000000	861000000	1080000000	747000000	1070000000	713000000	751000000	999000000	564000000	830000000	1.03:0.74:1.08:0.74:0.94:0.74:0.55:0.41:0.70:1.00:1.26:0.87:1.24:0.83:0.87:1.16:0.66:0.96	816000000	784000000	478000000	897000000	845000000	798000000	0.91:0.87:0.53:1.00:0.94:0.89	75776	Transmembrane 9 superfamily member 2 OS=Homo sapiens GN=TM9SF2 PE=1 SV=1
2079	1655	P40855|PEX19_HUMAN	43.99	16	3	3	Carbamidomethylation	149000000	166000000	165000000	275000000	330000000	264000000	486000000	122000000	249000000	203000000	271000000	238000000	302000000	296000000	227000000	296000000	295000000	257000000	0.73:0.82:0.81:1.35:1.63:1.30:2.39:0.60:1.23:1.00:1.33:1.17:1.49:1.46:1.12:1.46:1.45:1.26	172000000	290000000	286000000	237000000	275000000	283000000	0.73:1.22:1.20:1.00:1.16:1.19	32807	Peroxisomal biogenesis factor 19 OS=Homo sapiens GN=PEX19 PE=1 SV=1
661	680	Q8N0X7|SPG20_HUMAN	43.97	17	7	7	Acetylation (N-term); Deamidation (NQ); Carbamidomethylation	661000000	333000000	583000000	773000000	887000000	692000000	757000000	539000000	573000000	592000000	710000000	562000000	679000000	839000000	586000000	1070000000	873000000	845000000	1.12:0.56:0.98:1.30:1.50:1.17:1.28:0.91:0.97:1.00:1.20:0.95:1.15:1.42:0.99:1.80:1.48:1.43	614000000	784000000	654000000	621000000	701000000	929000000	0.99:1.26:1.05:1.00:1.13:1.49	72833	Spartin OS=Homo sapiens GN=SPG20 PE=1 SV=1
508	214	O00148|DX39A_HUMAN	43.93	21	9	1		532000000	507000000	563000000	847000000	697000000	488000000	1030000000	521000000	663000000	724000000	594000000	619000000	829000000	797000000	577000000	1080000000	919000000	832000000	0.73:0.70:0.78:1.17:0.96:0.67:1.42:0.72:0.92:1.00:0.82:0.85:1.14:1.10:0.80:1.49:1.27:1.15	534000000	677000000	737000000	646000000	734000000	943000000	0.83:1.05:1.14:1.00:1.14:1.46	49130	ATP-dependent RNA helicase DDX39A OS=Homo sapiens GN=DDX39A PE=1 SV=2
2396	1674	Q96F86|EDC3_HUMAN	43.91	9	3	3	Deamidation (NQ); Oxidation (HW)	438000000	374000000	326000000	453000000	531000000	375000000	338000000	229000000	202000000	426000000	457000000	324000000	285000000	380000000	223000000	490000000	410000000	360000000	1.03:0.88:0.77:1.07:1.25:0.88:0.79:0.54:0.47:1.00:1.07:0.76:0.67:0.89:0.53:1.15:0.96:0.85	388000000	453000000	350000000	402000000	296000000	420000000	0.97:1.13:0.87:1.00:0.74:1.04	56078	Enhancer of mRNA-decapping protein 3 OS=Homo sapiens GN=EDC3 PE=1 SV=1
2635	2253	Q9H3P2|NELFA_HUMAN	43.86	8	2	2		188000000	177000000	142000000	204000000	234000000	152000000	154000000	260000000	145000000	189000000	333000000	147000000	268000000	390000000	238000000	187000000	299000000	183000000	1.00:0.94:0.75:1.08:1.24:0.80:0.82:1.38:0.77:1.00:1.77:0.78:1.42:2.07:1.26:0.99:1.58:0.97	169000000	196000000	186000000	223000000	298000000	223000000	0.76:0.88:0.84:1.00:1.34:1.00	57277	Negative elongation factor A OS=Homo sapiens GN=NELFA PE=1 SV=3
2538	2094	Q9BPX5|ARP5L_HUMAN	43.79	22	3	2	Deamidation (NQ)	492000000	309000000	392000000	428000000	621000000	373000000	223000000	627000000	134000000	561000000	503000000	409000000	593000000	583000000	77200000	828000000	672000000	605000000	0.88:0.55:0.70:0.76:1.11:0.67:0.40:1.12:0.24:1.00:0.90:0.73:1.06:1.04:0.14:1.47:1.20:1.08	398000000	474000000	611000000	491000000	561000000	716000000	0.81:0.97:1.24:1.00:1.14:1.46	16941	Actin-related protein 2/3 complex subunit 5-like protein OS=Homo sapiens GN=ARPC5L PE=1 SV=1
2029	2452	Q06124|PTN11_HUMAN	43.7	9	4	4	Carbamidomethylation	384000000	414000000	278000000	462000000	575000000	356000000	317000000	551000000	257000000	517000000	398000000	293000000	483000000	419000000	251000000	592000000	856000000	450000000	0.74:0.80:0.54:0.89:1.11:0.69:0.61:1.07:0.50:1.00:0.77:0.57:0.93:0.81:0.49:1.14:1.66:0.87	367000000	465000000	375000000	402000000	405000000	632000000	0.91:1.15:0.93:1.00:1.01:1.57	68436	Tyrosine-protein phosphatase non-receptor type 11 OS=Homo sapiens GN=PTPN11 PE=1 SV=2
1439	1457	P58546|MTPN_HUMAN	43.61	45	5	5	Carbamidomethylation; Acetylation (N-term); Deamidation (NQ)	1920000000	2010000000	1560000000	1530000000	2180000000	1110000000	1360000000	1390000000	1110000000	1060000000	1130000000	832000000	1130000000	1170000000	816000000	1710000000	1850000000	892000000	1.81:1.90:1.47:1.44:2.05:1.04:1.28:1.31:1.04:1.00:1.06:0.78:1.07:1.10:0.77:1.61:1.74:0.84	1830000000	1630000000	1320000000	1010000000	1040000000	1650000000	1.82:1.62:1.31:1.00:1.03:1.64	12895	Myotrophin OS=Homo sapiens GN=MTPN PE=1 SV=2
357	99	P42224|STAT1_HUMAN	43.53	27	15	15	Carbamidomethylation; Acetylation (N-term); Pyro-glu from Q; Deamidation (NQ); Oxidation (HW)	1350000000	1490000000	1080000000	1430000000	1290000000	1230000000	2150000000	1560000000	1240000000	1350000000	1010000000	1230000000	1150000000	897000000	757000000	1110000000	1390000000	894000000	1.00:1.10:0.80:1.06:0.96:0.91:1.59:1.15:0.92:1.00:0.74:0.91:0.85:0.66:0.56:0.82:1.03:0.66	1310000000	1320000000	1670000000	1190000000	936000000	1130000000	1.10:1.10:1.40:1.00:0.78:0.95	87335	Signal transducer and activator of transcription 1-alpha/beta OS=Homo sapiens GN=STAT1 PE=1 SV=2
2154	2993	P63167|DYL1_HUMAN	43.52	37	2	1	Carbamidomethylation	119000000	101000000	311000000	135000000	115000000	339000000	713000000	182000000	486000000	199000000	214000000	512000000	149000000	134000000	236000000	241000000	293000000	538000000	0.60:0.51:1.56:0.68:0.58:1.70:3.59:0.92:2.44:1.00:1.08:2.58:0.75:0.68:1.19:1.22:1.48:2.71	316000000	361000000	597000000	547000000	276000000	589000000	0.58:0.66:1.09:1.00:0.51:1.08	10366	Dynein light chain 1 cytoplasmic OS=Homo sapiens GN=DYNLL1 PE=1 SV=1
386	1232	Q15075|EEA1_HUMAN	43.52	11	11	11	Carbamidomethylation; Deamidation (NQ)	392000000	334000000	358000000	357000000	699000000	211000000	1090000000	471000000	518000000	392000000	594000000	279000000	444000000	485000000	252000000	477000000	447000000	433000000	1.00:0.85:0.91:0.91:1.78:0.54:2.78:1.20:1.32:1.00:1.51:0.71:1.13:1.24:0.64:1.22:1.14:1.10	448000000	623000000	694000000	568000000	394000000	452000000	0.79:1.10:1.22:1.00:0.69:0.80	162465	Early endosome antigen 1 OS=Homo sapiens GN=EEA1 PE=1 SV=2
1521	1110	Q9NS69|TOM22_HUMAN	43.5	48	5	5	Acetylation (N-term); Deamidation (NQ); Phosphorylation (STY)	1520000000	1390000000	1080000000	1100000000	1270000000	814000000	1690000000	1950000000	1620000000	1810000000	2240000000	1750000000	1300000000	1220000000	940000000	2650000000	2100000000	2260000000	0.84:0.77:0.59:0.61:0.70:0.45:0.93:1.08:0.89:1.00:1.23:0.97:0.72:0.67:0.52:1.46:1.16:1.25	1330000000	1060000000	1750000000	1930000000	1150000000	2340000000	0.69:0.55:0.91:1.00:0.60:1.21	15522	Mitochondrial import receptor subunit TOM22 homolog OS=Homo sapiens GN=TOMM22 PE=1 SV=3
1396	756	Q16630|CPSF6_HUMAN	43.48	12	5	5	Carbamidomethylation; Acetylation (N-term); Deamidation (NQ)	1370000000	1160000000	1000000000	1250000000	1820000000	855000000	992000000	1640000000	1070000000	1260000000	1290000000	954000000	1270000000	934000000	1280000000	2290000000	2170000000	1750000000	1.08:0.92:0.80:0.99:1.44:0.68:0.79:1.31:0.85:1.00:1.02:0.76:1.01:0.74:1.01:1.82:1.73:1.39	1210000000	1310000000	1270000000	1170000000	1160000000	2320000000	1.03:1.12:1.09:1.00:1.00:1.99	59210	Cleavage and polyadenylation specificity factor subunit 6 OS=Homo sapiens GN=CPSF6 PE=1 SV=2
1501	1981	P12694|ODBA_HUMAN	43.43	19	5	5	Oxidation (M); Deamidation (NQ)	141000000	113000000	993000000	375000000	373000000	175000000	214000000	157000000	160000000	195000000	427000000	745000000	227000000	173000000	1230000000	123000000	253000000	78300000	0.73:0.58:5.10:1.93:1.92:0.90:1.10:0.81:0.82:1.00:2.19:3.83:1.17:0.89:6.34:0.63:1.30:0.40	571000000	332000000	179000000	683000000	1340000000	151000000	0.84:0.49:0.26:1.00:1.96:0.22	50471	2-oxoisovalerate dehydrogenase subunit alpha mitochondrial OS=Homo sapiens GN=BCKDHA PE=1 SV=2
3040	14446	Q9BUP3|HTAI2_HUMAN	43.42	12	2	2	Carbamidomethylation; Citrullination	134000000	129000000	97400000	133000000	154000000	92500000	220000000	283000000	203000000	292000000	309000000	164000000	151000000	236000000	147000000	456000000	478000000	238000000	0.46:0.44:0.33:0.46:0.53:0.32:0.75:0.97:0.70:1.00:1.06:0.56:0.52:0.81:0.50:1.56:1.64:0.82	120000000	127000000	235000000	255000000	178000000	391000000	0.47:0.50:0.92:1.00:0.70:1.53	27049	Oxidoreductase HTATIP2 OS=Homo sapiens GN=HTATIP2 PE=1 SV=2
1255	1102	P36405|ARL3_HUMAN	43.31	29	3	3	Carbamidomethylation; Pyro-glu from Q	754000000	799000000	662000000	723000000	959000000	718000000	381000000	571000000	413000000	486000000	889000000	427000000	364000000	744000000	491000000	1050000000	440000000	765000000	1.55:1.65:1.36:1.49:1.98:1.48:0.79:1.18:0.85:1.00:1.83:0.88:0.75:1.53:1.01:2.15:0.91:1.58	738000000	800000000	455000000	600000000	533000000	750000000	1.23:1.33:0.76:1.00:0.89:1.25	20456	ADP-ribosylation factor-like protein 3 OS=Homo sapiens GN=ARL3 PE=1 SV=2
2841	2859	Q9NWV4|CA123_HUMAN	43.28	16	2	2	Carbamidomethylation	353000000	385000000	212000000	432000000	548000000	295000000	182000000	338000000	205000000	337000000	351000000	214000000	373000000	358000000	255000000	404000000	589000000	260000000	1.05:1.14:0.63:1.28:1.62:0.87:0.54:1.00:0.61:1.00:1.04:0.63:1.10:1.06:0.76:1.20:1.75:0.77	339000000	425000000	242000000	301000000	329000000	601000000	1.13:1.41:0.80:1.00:1.09:2.00	18048	UPF0587 protein C1orf123 OS=Homo sapiens GN=C1orf123 PE=1 SV=1
4224	2438	Q9Y673|ALG5_HUMAN	43.21	10	2	2		337000000	294000000	273000000	389000000	457000000	420000000	448000000	413000000	437000000	394000000	274000000	331000000	499000000	654000000	434000000	504000000	517000000	385000000	0.85:0.75:0.69:0.99:1.16:1.07:1.14:1.05:1.11:1.00:0.69:0.84:1.27:1.66:1.10:1.28:1.31:0.98	301000000	422000000	433000000	333000000	529000000	470000000	0.90:1.27:1.30:1.00:1.59:1.41	36946	Dolichyl-phosphate beta-glucosyltransferase OS=Homo sapiens GN=ALG5 PE=1 SV=1
2653	1926	Q13568|IRF5_HUMAN	43.1	9	3	3	Acetylation (N-term); Carbamidomethylation	295000000	262000000	185000000	292000000	544000000	430000000	298000000	529000000	439000000	475000000	586000000	370000000	312000000	432000000	366000000	348000000	553000000	402000000	0.62:0.55:0.39:0.62:1.15:0.90:0.63:1.11:0.92:1.00:1.23:0.78:0.66:0.91:0.77:0.73:1.16:0.85	279000000	491000000	465000000	477000000	416000000	478000000	0.58:1.03:0.98:1.00:0.87:1.00	56044	Interferon regulatory factor 5 OS=Homo sapiens GN=IRF5 PE=1 SV=2
3277	2172	Q9UHJ6|SHPK_HUMAN	42.98	8	3	3	Acetylation (N-term); Oxidation (M); Phosphorylation (STY); Citrullination	144000000	114000000	75500000	143000000	198000000	134000000	69400000	168000000	115000000	92500000	108000000	86400000	106000000	291000000	206000000	122000000	79200000	101000000	1.55:1.23:0.82:1.55:2.14:1.45:0.75:1.81:1.24:1.00:1.17:0.93:1.15:3.15:2.23:1.31:0.86:1.09	111000000	158000000	117000000	95600000	201000000	100000000	1.16:1.65:1.23:1.00:2.10:1.05	51491	Sedoheptulokinase OS=Homo sapiens GN=SHPK PE=1 SV=3
3121	42456	Q9HA77|SYCM_HUMAN	42.98	8	3	3		183000000	204000000	142000000	457000000	296000000	269000000	232000000	229000000	238000000	402000000	258000000	275000000	349000000	259000000	141000000	312000000	386000000	229000000	0.45:0.51:0.35:1.13:0.74:0.67:0.58:0.57:0.59:1.00:0.64:0.68:0.87:0.64:0.35:0.78:0.96:0.57	176000000	341000000	233000000	312000000	250000000	309000000	0.57:1.09:0.75:1.00:0.80:0.99	62224	Probable cysteine--tRNA ligase mitochondrial OS=Homo sapiens GN=CARS2 PE=1 SV=1
1335	1266	P62995|TRA2B_HUMAN	42.91	15	3	3	Carbamidomethylation; Phosphorylation (STY)	372000000	266000000	299000000	213000000	373000000	366000000	153000000	337000000	224000000	574000000	538000000	302000000	563000000	294000000	393000000	562000000	347000000	354000000	0.65:0.46:0.52:0.37:0.65:0.64:0.27:0.59:0.39:1.00:0.94:0.53:0.98:0.51:0.68:0.98:0.61:0.62	313000000	359000000	238000000	471000000	478000000	421000000	0.66:0.76:0.50:1.00:1.01:0.89	33666	Transformer-2 protein homolog beta OS=Homo sapiens GN=TRA2B PE=1 SV=1
1356	1348	Q7Z3K3|POGZ_HUMAN	42.88	5	3	3		227000000	287000000	111000000	339000000	313000000	204000000	369000000	407000000	171000000	275000000	403000000	243000000	294000000	294000000	243000000	373000000	434000000	288000000	0.83:1.04:0.40:1.23:1.14:0.74:1.34:1.48:0.62:1.00:1.46:0.88:1.07:1.07:0.88:1.36:1.58:1.05	251000000	285000000	316000000	307000000	277000000	365000000	0.82:0.93:1.03:1.00:0.90:1.19	155343	Pogo transposable element with ZNF domain OS=Homo sapiens GN=POGZ PE=1 SV=2
1377	6327	Q8WUM0|NU133_HUMAN	42.88	6	5	5	Acetylation (N-term)	338000000	277000000	354000000	365000000	328000000	359000000	609000000	559000000	372000000	415000000	435000000	375000000	408000000	373000000	328000000	626000000	516000000	557000000	0.82:0.67:0.85:0.88:0.79:0.87:1.47:1.35:0.90:1.00:1.05:0.90:0.98:0.90:0.79:1.51:1.24:1.34	323000000	351000000	513000000	408000000	369000000	566000000	0.79:0.86:1.26:1.00:0.90:1.39	128979	Nuclear pore complex protein Nup133 OS=Homo sapiens GN=NUP133 PE=1 SV=2
2980	2306	P10398|ARAF_HUMAN	42.77	2	1	1	Carbamidomethylation	110000000	157000000	124000000	54800000	122000000	110000000	0	34700000	16500000	91800000	52300000	36700000	160000000	157000000	40500000	288000000	303000000	199000000	1.20:1.71:1.35:0.60:1.33:1.19:0:0.38:0.18:1.00:0.57:0.40:1.74:1.71:0.44:3.13:3.30:2.17	130000000	118000000	25600000	99200000	154000000	264000000	1.31:1.19:0.26:1.00:1.55:2.66	67585	Serine/threonine-protein kinase A-Raf OS=Homo sapiens GN=ARAF PE=1 SV=2
592	644	O94906|PRP6_HUMAN	42.77	14	8	8	Carbamidomethylation; Deamidation (NQ); Oxidation (HW)	439000000	385000000	176000000	613000000	636000000	486000000	518000000	396000000	360000000	397000000	553000000	307000000	433000000	547000000	313000000	694000000	640000000	417000000	1.11:0.97:0.44:1.54:1.60:1.22:1.30:1.00:0.91:1.00:1.39:0.77:1.09:1.38:0.79:1.75:1.61:1.05	380000000	578000000	425000000	419000000	431000000	583000000	0.91:1.38:1.01:1.00:1.03:1.39	106925	Pre-mRNA-processing factor 6 OS=Homo sapiens GN=PRPF6 PE=1 SV=1
1078	1508	Q01581|HMCS1_HUMAN	42.76	10	4	4	Carbamidomethylation; Acetylation (N-term); Deamidation (NQ)	570000000	735000000	589000000	786000000	725000000	519000000	503000000	739000000	601000000	697000000	650000000	512000000	943000000	804000000	579000000	1090000000	1310000000	907000000	0.82:1.05:0.84:1.13:1.04:0.74:0.72:1.06:0.86:1.00:0.93:0.73:1.35:1.15:0.83:1.57:1.89:1.30	631000000	676000000	614000000	620000000	775000000	1110000000	1.02:1.09:0.99:1.00:1.25:1.78	57294	Hydroxymethylglutaryl-CoA synthase cytoplasmic OS=Homo sapiens GN=HMGCS1 PE=1 SV=2
2325	1973	Q9BVG4|PBDC1_HUMAN	42.75	30	5	5	Acetylation (N-term); Carbamidomethylation	404000000	565000000	220000000	920000000	1250000000	412000000	651000000	470000000	354000000	583000000	898000000	365000000	410000000	397000000	168000000	559000000	712000000	332000000	0.69:0.97:0.38:1.58:2.15:0.71:1.12:0.81:0.61:1.00:1.54:0.63:0.70:0.68:0.29:0.96:1.22:0.57	396000000	861000000	492000000	615000000	338000000	534000000	0.64:1.40:0.80:1.00:0.55:0.87	26057	Protein PBDC1 OS=Homo sapiens GN=PBDC1 PE=1 SV=1
1927	1936	P40306|PSB10_HUMAN	42.75	20	3	3	Phosphorylation (STY); Citrullination; Carbamidomethylation	965000000	1080000000	853000000	1390000000	1560000000	1020000000	1700000000	1450000000	1340000000	1030000000	1250000000	798000000	988000000	1140000000	438000000	1360000000	945000000	1260000000	0.94:1.05:0.83:1.36:1.52:0.99:1.66:1.41:1.30:1.00:1.22:0.78:0.96:1.11:0.43:1.33:0.92:1.23	1040000000	1340000000	1500000000	1030000000	974000000	1310000000	1.00:1.30:1.45:1.00:0.94:1.26	28936	Proteasome subunit beta type-10 OS=Homo sapiens GN=PSMB10 PE=1 SV=1
1157	1240	P35249|RFC4_HUMAN	42.7	9	3	3	Carbamidomethylation	200000000	938000000	263000000	331000000	369000000	207000000	188000000	246000000	207000000	217000000	253000000	272000000	296000000	298000000	204000000	676000000	645000000	446000000	0.92:4.32:1.21:1.52:1.70:0.95:0.87:1.13:0.95:1.00:1.17:1.25:1.36:1.37:0.94:3.11:2.97:2.05	508000000	338000000	214000000	322000000	266000000	589000000	1.58:1.05:0.66:1.00:0.83:1.83	39682	Replication factor C subunit 4 OS=Homo sapiens GN=RFC4 PE=1 SV=2
166	72	Q04637|IF4G1_HUMAN	42.69	20	22	19	Carbamidomethylation; Pyro-glu from Q; Deamidation (NQ)	1900000000	1640000000	1540000000	2620000000	3420000000	1790000000	2290000000	1930000000	2440000000	2730000000	2860000000	1800000000	1740000000	2630000000	872000000	3750000000	2640000000	2500000000	0.70:0.60:0.56:0.96:1.25:0.66:0.84:0.71:0.89:1.00:1.05:0.66:0.64:0.96:0.32:1.37:0.97:0.91	1690000000	2610000000	2230000000	2470000000	1760000000	2980000000	0.68:1.05:0.90:1.00:0.71:1.20	175490	Eukaryotic translation initiation factor 4 gamma 1 OS=Homo sapiens GN=EIF4G1 PE=1 SV=4
[truncated: 2,598 more rows]
