# Supplementary material for: Alterations in the HLA-B*57:01 Immunopeptidome by Flucloxacillin and Immunogenicity of Drug-Haptenated Peptides
Source: Front Immunol. 2021 Feb 9;11:629399. doi: 10.3389/fimmu.2020.629399 (PMC7900192; doi:10.3389/fimmu.2020.629399)
Supplement: Supplementary file 6 [file Table_2.xlsx]

## Sheet: Table S2A-Unt
Table S2A - Curated peptide list from Immunopeptidome of B721-5701 cells treated without FLX (UNT) (combined data from duplicate samples)
Untreated												HLA-B5701
Peptide	-10lgP	Mass	Length	ppm	m/z	RT	Area Medium	Area FLX	Accession	PTM	AScore	nM	%Rank	N_binders
ASRPPVTL	27.12	839.486	8	0.7	420.751	33.23	2730000	2460000	Q15365|PCBP1_HUMAN:Q15366|PCBP2_HUMAN			13989.4	13	0
D(+42.01)LQRNYIF	17.57	1109.55	8	0.5	555.783	51.55	2390000	7120000	Q86YC3|LRC33_HUMAN	Acetylation (N-term)	D1:Acetylation (N-term):1000.00	15317.4	15	0
GSGLVAPV	10.72	698.396	8	1.1	350.206	38.26	19200000		Q96F45|ZN503_HUMAN			26977.5	40	0
GTEEEKIL	11.25	917.471	8	-0.3	306.831	22.94	85600		P62495|ERF1_HUMAN			26435.7	38	0
IAKIPNFW	35.17	987.554	8	-0.1	494.784	65	1050000	12400000	Q01105|SET_HUMAN			297.2	0.6	1
IAPTGHSL	21.93	794.429	8	0.4	398.222	27.16	31000000	35200000	Q9NVA2|SEP11_HUMAN:Q14141|SEPT6_HUMAN			14435.9	14	0
IAWTVQYF	13.08	1026.52	8	-2.4	514.265	43.11	11700000		Q68CR1|SE1L3_HUMAN			583.4	0.9	1
ISKPPPGF	27.61	841.47	8	0.7	421.742	34.2	10600000	13100000	Q86UK7|ZN598_HUMAN			6751.7	6	0
ISNSPRVI	32.14	884.508	8	-1.7	443.26	30.46	3830000	2990000	P19387|RPB3_HUMAN			14778.7	14	0
ISRTAVVM(+15.99)	22.49	891.485	8	0.6	446.75	23.19	3020000	2340000	O75533|SF3B1_HUMAN	Oxidation (M)	M8:Oxidation (M):1000.00	2264	2.5	0
ISRTPVLM(+15.99)	23.08	931.516	8	1.7	466.766	30.99	4200000	3860000	Q9H3K2|GHITM_HUMAN	Oxidation (M)	M8:Oxidation (M):1000.00	2391.1	2.5	0
ITDKAREF	18.57	978.513	8	-0.5	327.178	22.28	2320000	1870000	O75533|SF3B1_HUMAN			20607.1	23	0
KAFHLFCL	12.8	977.516	8	1.4	326.846	24.41	306000		Q9UIG0|BAZ1B_HUMAN			12572.7	11	0
KAM(+15.99)FARFT	11.99	986.501	8	1.7	494.259	27.69	791000		P52756|RBM5_HUMAN	Oxidation (M)	M3:Oxidation (M):1000.00	422.1	0.8	1
KARLPLRL	11.24	965.65	8	2	322.891	29.39	20300000	8220000	O00767|ACOD_HUMAN			12501.3	11	0
KARNSFRY	27.68	1040.55	8	0.4	521.283	18.28	95500000	124000000	P46779|RL28_HUMAN			4350.5	4	0
KDLLLNTM(+15.99)	12.8	962.511	8	-0.7	482.262	31.1	287000		P78527|PRKDC_HUMAN	Oxidation (M)	M8:Oxidation (M):1000.00	3502.5	3.5	0
KDRSIAVW	19.36	973.534	8	0.4	487.775	44.84	185000	2560000	Q9UKB1|FBW1B_HUMAN:Q9Y297|FBW1A_HUMAN			4293	4	0
KGIRAVLL	12.95	868.586	8	-1.3	435.3	31.42	291000		P54819|KAD2_HUMAN			17541.5	18	0
KSFDKWTT	12.97	1011.5	8	1.1	506.759	21.57	1690000	1170000	Q05823|RN5A_HUMAN			8459.6	7.5	0
KSFVLPSW	24.05	962.523	8	-0.6	482.268	63.26	147000	8040000	Q9H147|TDIF1_HUMAN			12.9	0.025	1
KSR(+.98)LKNPK	11	970.592	8	-1.2	486.303	31.07	1700000		O94906|PRP6_HUMAN	Citrullination	R3:Citrullination:1000.00	2655.7	3	0
KSRDPIIF	25.99	974.555	8	-0.6	488.284	36.37	15600000	19400000	Q14692|BMS1_HUMAN			3667.5	3.5	0
KSTPRPKF	26.24	959.555	8	-2.1	320.858	17.27	2000000	2730000	P62906|RL10A_HUMAN			2375.6	2.5	0
KTGTAYTF	31.25	887.439	8	-0.8	444.726	32.28	12700000	16100000	P17844|DDX5_HUMAN			1272	1.6	1
KTKDVTVW	31.53	975.539	8	-0.4	488.777	27.23	650000	78100000	Q96DR4|STAR4_HUMAN			110	0.3	1
KTKEAVLL	30.27	900.564	8	-0.1	451.289	24.75	15700000	19600000	P36578|RL4_HUMAN			9690.3	8.5	0
KTKEGYYY	37.6	1050.5	8	0.9	526.259	23.66	6440000	7930000	P08243|ASNS_HUMAN			2647	3	0
KTKKPLLI	33.66	939.648	8	-0.9	470.831	21.71	26700000	21800000	Q9BSR8|YIPF4_HUMAN			10410.1	9	0
KTKRSIQF	33.42	1006.59	8	-1.2	504.303	19.68	18700000	16700000	P68363|TBA1B_HUMAN:P68366|TBA4A_HUMAN			1568.8	1.8	1
KTKTDVLI	15.99	916.559	8	-0.8	459.287	26.63	1420000	1930000	Q9NZ08|ERAP1_HUMAN			12779.1	12	0
KTRFSYAF	26.24	1018.52	8	-1.5	510.268	38.91	6570000	9620000	P24863|CCNC_HUMAN			1926.8	2.5	0
KTRPPVRL	14.73	965.613	8	0.1	322.878	19.03	4380000		Q8N1W2|ZN710_HUMAN			4162.2	4	0
KTRSPVTF	15.81	934.524	8	-0.5	468.269	24.94	314000	509000	A5YKK6|CNOT1_HUMAN			1598	1.8	1
KTSLVQLL	20	900.564	8	-1.6	451.289	25.75	3010000	6800000	Q9NU22|MDN1_HUMAN			3144.4	3	0
KTTVARLI	13.52	900.576	8	-0.9	451.295	29.18	1110000	3310000	Q8NBI5|S43A3_HUMAN			9840	8.5	0
KVAGRLLL	10.28	868.586	8	-0.4	435.3	32.2	171000		Q9P1Z9|CC180_HUMAN			23458.3	30	0
KVTPGPPF	17.35	841.47	8	-0.2	421.742	33.53	3870000	9390000	Q68DN1|CB016_HUMAN			23343.6	29	0
LSKARETF	25.46	950.519	8	0.7	476.267	24.93	11200000	9570000	Q9HCJ5|ZSWM6_HUMAN:Q9P217|ZSWM5_HUMAN			5058.7	4.5	0
LTRPPNYF	31.69	1006.52	8	2	504.27	44.26	2400000	1120000	Q8N543|OGFD1_HUMAN			1532.5	1.8	1
MFQIWKSW	10.46	1124.55	8	2.1	563.282	56.43	2820000		Q8IY21|DDX60_HUMAN			402.5	0.8	1
PTLSRVLM(+15.99)	10.97	931.516	8	0.3	466.765	31.33	686000		P98088|MUC5A_HUMAN	Oxidation (M)	M8:Oxidation (M):1000.00	5998.1	5.5	0
QLIQYTAF	14.39	982.512	8	0.9	492.264	56.6	774000		Q03933|HSF2_HUMAN			33347.6	70	0
QVLEQQLV	11.91	955.534	8	0.9	478.775	24.36	26800000		Q8WXH0|SYNE2_HUMAN			34597.9	75	0
RSHIPLAF	11.51	939.529	8	-0.5	470.772	41.07	177000		Q9Y618|NCOR2_HUMAN			3748.2	3.5	0
RSKIAETF	24.53	950.519	8	-1	476.266	25.87	11200000	15100000	Q9Y5A7|NUB1_HUMAN			1499.9	1.7	1
RSPALFIY	17.09	965.533	8	0	483.774	50.42	2660000	614000	Q9Y2P5|S27A5_HUMAN			1535.2	1.8	1
RSRFPQTF	24.98	1037.54	8	1.5	346.855	31.75	2210000	3870000	Q9Y5V3|MAGD1_HUMAN			912.6	1.3	1
RTALPRIF	14.92	972.587	8	0.4	487.301	45.2	2340000	4510000	Q03518|TAP1_HUMAN			2859.2	3	0
RTGKSYLM(+15.99)	19.84	970.491	8	-0.7	486.252	19.54	3650000	4010000	Q6ZN66|GBP6_HUMAN:Q96PP9|GBP4_HUMAN:Q96PP8|GBP5_HUMAN:P32456|GBP2_HUMAN:P32455|GBP1_HUMAN:Q9H0R5|GBP3_HUMAN:Q8N8V2|GBP7_HUMAN	Oxidation (M)	M8:Oxidation (M):1000.00	1367.6	1.6	1
RTKKPVVI	16.7	939.623	8	-0.7	314.215	17.24	2070000		Q9NSE4|SYIM_HUMAN			14874.4	14	0
RTKPPQLL	22.15	951.587	8	0.1	476.801	26.98	2090000	3760000	Q9NU22|MDN1_HUMAN			3550.6	3.5	0
RTRIGYSF	26.72	998.53	8	-2.3	333.85	33.81	338000000	401000000	Q9NYH9|UTP6_HUMAN			598.8	1	1
RTRRAVKF	19.44	1032.63	8	-1.5	259.164	16.91	9560000	8980000	P83731|RL24_HUMAN			621.9	1	1
S(+42.01)SLRPLLW	13.46	1012.57	8	2.6	507.294	55.4	813000		P60852|ZP1_HUMAN	Acetylation (N-term)	S1:Acetylation (N-term):1000.00	371.9	0.7	1
SILR(+.98)EFAF	11.23	982.512	8	0.8	492.264	57.72	1280000		Q13191|CBLB_HUMAN			8703.5	7.5	0
VSRIPVSF	27.61	903.518	8	1.5	452.767	49.05	12800000	16200000	O75427|LRCH4_HUMAN			5882.4	5	0
A(+42.01)IRNFVNTF	11.53	1122.58	9	-0.5	562.298	51.83	21600000		Q9Y232|CDYL_HUMAN	Acetylation (N-term)	A1:Acetylation (N-term):1000.00	15864.6	15	0
AAASHSYYW	35.9	1054.45	9	0.7	528.233	41.11	739000	15200000	Q9UHI6|DDX20_HUMAN			29.4	0.09	1
AANPHSFVF	32.3	988.477	9	-0.7	495.245	48.69	5510000	7420000	Q9NQ55|SSF1_HUMAN			2105	2.5	0
AAPATRAAL	27.02	840.482	9	0.1	421.248	23.81	2700000	493000	Q8N697|S15A4_HUMAN			19489.4	21	0
AAPEGKRSL	29.6	927.514	9	-0.5	310.178	17.16	6900000	7590000	Q9Y6B2|EID1_HUMAN			24560	32	0
AARLIQTTW	28.69	1058.59	9	-1.1	530.3	49.23	1120000	12700000	Q8IZT6|ASPM_HUMAN			11.7	0.02	1
AARTIQTAF	38.39	977.529	9	-0.7	489.772	36.21	104000000	131000000	Q5JU85|IQEC2_HUMAN:Q6DN90|IQEC1_HUMAN			1383.8	1.6	1
ALLPLKITF	11.33	1014.65	9	-4.4	508.329	34.96	1090000		P58107|EPIPL_HUMAN			10491.4	9	0
ALRVLNSYW	22.05	1120.6	9	-0.8	561.308	61.75	891000	14200000	P61313|RL15_HUMAN			1056.9	1.4	1
ASAIIIQRW	39.02	1056.61	9	0.7	529.312	53.67	8800000	21900000	Q8IZT6|ASPM_HUMAN			18.3	0.04	1
ASAILFREW	25.47	1091.58	9	0.9	546.796	64.24	830000	4060000	Q7RTP0|NIPA1_HUMAN			98.6	0.3	1
ASGRFGQDF	34.84	983.446	9	0.7	492.731	37.88	1330000	1420000	Q9Y490|TLN1_HUMAN			2567.6	3	0
ASLDISRKW	40.45	1074.58	9	0.2	538.298	40.1	11600000	118000000	Q9NWU5|RM22_HUMAN			23.6	0.06	1
ASLPLRVSF	29.62	988.571	9	-0.4	495.292	60.54	17200000	26200000	O96005|CLPT1_HUMAN			100.8	0.3	1
ASM(+15.99)TVRELF	26.79	1068.53	9	-0.6	535.271	46.05	2890000	4270000	Q8IY37|DHX37_HUMAN	Oxidation (M)	M3:Oxidation (M):1000.00	478	0.8	1
ASNYFRAM(+15.99)F	12.37	1121.5	9	0.6	561.756	50.9	3470000		Q8WZ60|KLHL6_HUMAN	Oxidation (M)	M8:Oxidation (M):1000.00	566	0.9	1
ASRAM(+15.99)IENF	17.42	1053.49	9	2.3	527.754	34.85	30500000	35700000	P41227|NAA10_HUMAN	Oxidation (M)	M5:Oxidation (M):1000.00	415.8	0.8	1
ASRGPIAFW	22.67	1003.52	9	0	502.769	60.24	1000000	12900000	Q9UNF1|MAGD2_HUMAN			36.8	0.125	1
ASRPKSYIY	17	1083.57	9	0.9	542.793	26.23	4470000	2090000	P42898|MTHR_HUMAN			483.9	0.8	1
ASSPVLRQM(+15.99)	14.73	1003.51	9	1.1	502.764	24.55	1900000	2230000	Q15788|NCOA1_HUMAN	Oxidation (M)	M9:Oxidation (M):1000.00	4637.8	4.5	0
ASYRQVASF	18.8	1027.51	9	0.2	514.762	39.01	252000	472000	Q9UKK3|PARP4_HUMAN			189.4	0.5	1
ATADVEWRW	31.67	1132.53	9	-0.5	567.272	59.93	274000	2670000	Q96G21|IMP4_HUMAN			16	0.04	1
ATIKEIVVW	10.45	1057.62	9	3.7	529.818	61.57	1020000		Q6PIW4|FIGL1_HUMAN			29.6	0.09	1
ATIPNARQF	15.88	1016.54	9	0.3	509.278	39.56	578000	495000	P42285|MTREX_HUMAN			211.3	0.5	1
ATKAVLQEF	14.09	1005.55	9	1.1	503.783	42.98	1140000		Q9Y394|DHRS7_HUMAN			921.5	1.3	1
ATKKEITFF	44.98	1083.6	9	1	542.806	40.76	64400000	89000000	P20592|MX2_HUMAN			1746.4	1.9	1
ATLELTHNW	32.37	1083.53	9	0.7	542.775	52.09	3780000	21800000	Q04760|LGUL_HUMAN			22.6	0.06	1
ATLKGNAAW	36.69	930.492	9	-0.2	466.253	33.2	4290000	120000000	P07814|SYEP_HUMAN			54.6	0.175	1
ATLKNPILW	32.85	1054.62	9	0.6	528.316	59.92	1540000	28200000	P04844|RPN2_HUMAN			17.9	0.04	1
ATLLITRQF	26.52	1061.62	9	-0.1	531.819	54.87	4700000	7430000	Q9HCE9|ANO8_HUMAN			257.2	0.6	1
ATLLLERNF	23.72	1075.6	9	-0.1	538.808	56.92	5960000	8690000	O60443|GSDME_HUMAN			1696.1	1.9	1
ATLRTSRLL	19.37	1029.63	9	0.8	344.217	31.39	2090000	469000	P11926|DCOR_HUMAN			650.3	1	1
ATNPESKVF	32.46	991.497	9	-0.4	496.756	32.03	2520000	2700000	P27348|1433T_HUMAN			1100.8	1.4	1
ATNRITVTW	31.55	1060.57	9	1.1	531.291	48	22500000	92400000	Q8N2W9|PIAS4_HUMAN			20.5	0.05	1
ATNVNNWHW	35.25	1140.51	9	-1.1	571.262	51.85	957000	16700000	O95433|AHSA1_HUMAN			16.7	0.04	1
ATRKAFTTF	27.8	1041.56	9	2.3	521.789	29.11	18800000	25100000	Q14643|ITPR1_HUMAN			897.7	1.2	1
ATRPDYISW	23.57	1107.53	9	-0.6	554.774	52.32	9850000	87700000	P23258|TBG1_HUMAN			34.3	0.1	1
ATRRVHPAL	11.58	1019.6	9	-0.3	340.873	17.83	502000	1060000	Q9Y6I9|TX264_HUMAN			5287.8	4.5	0
ATSKVALVY	30.54	950.544	9	1.3	476.28	38.98	6640000	9130000	P06576|ATPB_HUMAN			1307.5	1.6	1
ATVILQRAF	25.6	1017.6	9	1	509.806	50.39	152000	956000	Q8IZT6|ASPM_HUMAN			1354.1	1.6	1
ATVTIQRHW	29.51	1110.59	9	2.8	371.206	33.53	1040000	7860000	Q8IZT6|ASPM_HUMAN			19.9	0.05	1
ATYM(+15.99)KPEM(+15.99)W	36.75	1187.5	9	-0.2	594.757	35.7	2420000	45600000	Q99613|EIF3C_HUMAN:B5ME19|EIFCL_HUMAN	Oxidation (M)	M4:Oxidation (M):1000.00;M8:Oxidation (M):1000.00	275.5	0.6	1
D(+42.01)AALRKITF	12.26	1075.6	9	-1	538.808	36.53	2380000	1180000	Q969X6|UTP4_HUMAN	Acetylation (N-term)	D1:Acetylation (N-term):1000.00	16407.1	16	0
DIFFEALNY	10.56	1130.53	9	-3.8	566.269	41.06	870000	1020000	Q16515|ASIC2_HUMAN:Q9UHC3|ASIC3_HUMAN			31311.4	60	0
DSENHYHTF	11.51	1148.45	9	-4.7	575.231	19.2	203000		Q8TCY9|URGCP_HUMAN			21971.6	26	0
EILATHPTW	14.77	1066.54	9	0.3	534.28	48.2	1430000	29600000	Q5JPE7|NOMO2_HUMAN:Q15155|NOMO1_HUMAN:P69849|NOMO3_HUMAN			1511.5	1.7	1
FARKFNALF	16.71	1112.61	9	0.1	557.314	49.83	3770000	16000000	Q00610|CLH1_HUMAN			315.9	0.6	1
FSHRIYVAY	16.4	1154.59	9	1.7	578.302	39.69	1770000	962000	P46977|STT3A_HUMAN			4501	4	0
FSKKQNFTF	13.4	1145.59	9	-3.3	573.799	33.33	1910000		Q9NU22|MDN1_HUMAN			1052.8	1.4	1
FSKPSSDTF	13.65	1014.47	9	-1.1	508.24	36.43	294000	343000	O15504|NUPL2_HUMAN			3443.3	3.5	0
FSLKNVKHF	29.34	1118.62	9	-1.1	373.881	35.77	6220000	6090000	O00148|DX39A_HUMAN			360.4	0.7	1
FTKPPIGTW	44.7	1045.56	9	0.9	523.788	53.7	6480000	84700000	P40763|STAT3_HUMAN			52.7	0.175	1
FVKKLEHSW	34.7	1172.63	9	-0.2	587.324	28.08	1440000	48800000	A2A3N6|PIPSL_HUMAN:Q99755|PI51A_HUMAN			91.2	0.25	1
GAVRENYTW	23	1094.51	9	1.5	548.265	40.27	751000	28500000	Q8IVD9|NUDC3_HUMAN			8.4	0.01	1
GSFGGIRLY	15.81	968.508	9	-0.7	485.261	59.71	872000	2010000	Q5VYK3|ECM29_HUMAN			426.9	0.8	1
GSHSM(+15.99)RYFY	23.22	1162.49	9	1.4	388.503	28.36	11500000	11600000	P30485|1B47_HUMAN:P30492|1B54_HUMAN:P30484|1B46_HUMAN:Q29940|1B59_HUMAN:P30464|1B15_HUMAN:P30493|1B55_HUMAN:P30495|1B56_HUMAN:P18465|1B57_HUMAN:Q29718|1B82_HUMAN:P01889|1B07_HUMAN:P30480|1B42_HUMAN:Q95365|1B38_HUMAN:P30475|1B39_HUMAN:Q29836|1B67_HUMAN:P30462|1B14_HUMAN:P30481|1B44_HUMAN:P18464|1B51_HUMAN:P30490|1B52_HUMAN:P30498|1B78_HUMAN:P30491|1B53_HUMAN:P10319|1B58_HUMAN:P04222|1C03_HUMAN:P30…	Oxidation (M)	M5:Oxidation (M):1000.00	452.4	0.8	1
GSM(+15.99)GLRSLW	27.82	1021.5	9	0.6	511.758	51.98	758000	11900000	Q9BV87|CNPD1_HUMAN	Oxidation (M)	M3:Oxidation (M):1000.00	15.2	0.03	1
GSRPSDARF	34.01	991.484	9	-1	331.502	19.92	1100000	1170000	Q15424|SAFB1_HUMAN			290.3	0.6	1
GSVSIFRQF	21.88	1039.55	9	1.6	520.781	57.44	4010000	7100000	Q9UJP4|KLH21_HUMAN			715.7	1.1	1
GTDRNAYVW	21.38	1080.5	9	-0.4	541.256	42.19	1020000	40100000	O15143|ARC1B_HUMAN			58.1	0.175	1
GTFRGTRYF	24.84	1103.55	9	-1.5	368.857	36.4	5080000	11400000	Q9NQC7|CYLD_HUMAN			140	0.4	1
GTHGVIVVY	17.45	943.513	9	0.6	472.764	42.95	1340000		Q15286|RAB35_HUMAN			2027.7	2.5	0
GTHKVTVLF	43.75	1000.57	9	-0.5	501.292	38.31	105000000	119000000	P21333|FLNA_HUMAN			588.1	1	1
GTHTVSVKY	35.24	990.513	9	-0.2	331.178	22.64	5170000	4750000	P21333|FLNA_HUMAN			2258.3	2.5	0
GTINERPEF	38.13	1061.51	9	1.5	531.765	39.08	6600000	8040000	Q58A45|PAN3_HUMAN			3942.4	4	0
GTKTKSNTW	24.14	1021.52	9	-0.7	511.767	17.91	1040000	979000	Q8NB66|UN13C_HUMAN			84	0.25	1
GTLKGHNGW	52.8	968.483	9	0.5	485.249	23.1	5670000	88200000	P63244|RACK1_HUMAN			38.3	0.125	1
GTLKVLRTY	14.7	1049.62	9	1.4	350.882	33.7	596000	353000	P0C0L4|CO4A_HUMAN:P0C0L5|CO4B_HUMAN			178.8	0.5	1
GTLSGHASW	42.62	914.425	9	-0.3	458.219	33.49	2430000	30400000	Q9GZS3|WDR61_HUMAN			18.8	0.05	1
GTM(+15.99)DIRHFF	38.34	1138.52	9	-0.2	570.269	48.8	26600000	38200000	Q9NTZ6|RBM12_HUMAN	Oxidation (M)	M3:Oxidation (M):1000.00	693.1	1.1	1
GTM(+15.99)PLRNIF	19.29	1063.55	9	-0.7	532.781	50.69	3050000		Q9NZ01|TECR_HUMAN	Oxidation (M)	M3:Oxidation (M):1000.00	624.7	1	1
GTMDIRHFF	30.18	1122.53	9	0.1	562.271	59.87	518000	5880000	Q9NTZ6|RBM12_HUMAN			687.7	1.1	1
GTRQVFSMA	10.91	995.486	9	-1.3	498.75	29.02	1000000		Q6SPF0|SAMD1_HUMAN			18208.3	19	0
GTVLKIITF	36.34	990.611	9	-1.1	496.312	67.56	3640000	6300000	P26599|PTBP1_HUMAN:O95758|PTBP3_HUMAN			3225.8	3	0
GTYGVRAAW	41.01	979.487	9	0.8	490.752	43.98	12300000	104000000	P13598|ICAM2_HUMAN			26.7	0.07	1
GVHTVHVTF	53.01	995.519	9	-0.9	498.766	35.32	70700000	83500000	P21333|FLNA_HUMAN			5973.8	5.5	0
H(+42.01)TDLPVSVF	15.71	1055.53	9	0.4	528.772	48	1530000	1570000	Q7L5N1|CSN6_HUMAN	Acetylation (N-term)	H1:Acetylation (N-term):1000.00	6807.9	6	0
HAGAAYREV	13.76	972.478	9	-1.5	487.245	18.72	2630000	840000	Q03052|PO3F1_HUMAN			13084.8	12	0
HAIPLRSSW	23.4	1065.57	9	-0.1	533.793	36.53	1960000	118000000	P62879|GBB2_HUMAN:Q9HAV0|GBB4_HUMAN:P62873|GBB1_HUMAN:P16520|GBB3_HUMAN			7.5	0.01	1
HAPIRVSPL	14.17	988.582	9	-2.2	495.297	32.97	1960000	2980000	O60336|MABP1_HUMAN			18311.4	19	0
HAPLTNIPL	12.03	974.555	9	1.2	488.285	50.09	191000		Q9NRR4|RNC_HUMAN			15966.7	16	0
HLAQLRKKF	12.07	1139.69	9	-1.7	380.904	19.01	592000		Q9Y3A4|RRP7A_HUMAN:Q9NSQ0|RRP7B_HUMAN			7808.5	6.5	0
HSFLYQPDW	29.78	1191.53	9	0.1	596.775	63.11	1640000	17200000	P37268|FDFT_HUMAN			8.2	0.01	1
HSHDLQRM(+15.99)F	13.56	1185.53	9	0.6	396.186	21.71	1080000	969000	P23497|SP100_HUMAN	Oxidation (M)	M8:Oxidation (M):1000.00	153.3	0.4	1
HSHPHITVW	43.2	1112.55	9	-0.5	557.283	28.47	4570000	85900000	P46736|BRCC3_HUMAN			8.5	0.01	1
HSKESKPTF	11.06	1059.53	9	-0.5	354.185	16.62	139000		Q96DU3|SLAF6_HUMAN			842.6	1.2	1
HSLPAVRQY	27.25	1069.57	9	-2.1	357.529	28.77	10800000	24000000	Q15008|PSMD6_HUMAN			27.2	0.08	1
HSNGTVSLW	27.46	999.477	9	0.8	500.746	46.4	2950000	89700000	O15213|WDR46_HUMAN			16	0.04	1
HSNPEPKTF	41.18	1055.5	9	1.4	528.76	21.67	1700000	1600000	Q9NS87|KIF15_HUMAN			103	0.3	1
HSREIRELF	15.1	1185.63	9	-0.9	396.215	33.62	1520000	1740000	Q9Y4C8|RBM19_HUMAN			69.7	0.2	1
HSYSVLERF	17.78	1136.56	9	4.5	569.29	43.68	3220000	1360000	Q53EL6|PDCD4_HUMAN			39.9	0.125	1
HTIQIRQDW	31.41	1195.61	9	1	598.813	38.21	1850000	12300000	Q8WXB1|MT21A_HUMAN			18.4	0.04	1
HTLENQREF	18.43	1172.56	9	0.5	587.286	25.28	2690000	3670000	O15031|PLXB2_HUMAN			90.9	0.25	1
HTQKNRQFF	40.73	1204.61	9	-0.4	402.544	20.28	11000000	14700000	P86791|CCZ1_HUMAN:P86790|CCZ1B_HUMAN			771.8	1.1	1
HTRSDVRLY	42.44	1145.59	9	0	382.872	21.82	15600000	18400000	Q86TI2|DPP9_HUMAN			165.3	0.4	1
HTWNGIRHL	45.87	1132.59	9	0.5	378.537	27.61	6300000	47000000	Q99643|C560_HUMAN			789.8	1.1	1
I(+42.01)YAWSIGGF	14.94	1054.51	9	-2.3	528.262	47.22	5470000	4090000	O95870|ABHGA_HUMAN	Acetylation (N-term)	I1:Acetylation (N-term):1000.00	838.5	1.2	1
IAKKTTPLL	29.05	983.638	9	-0.1	492.826	26.83	1690000	1840000	Q9BZI7|REN3B_HUMAN			3124	3	0
IAREEASNF	11.55	1035.5	9	0.6	518.757	28.76	508000	544000	P25788|PSA3_HUMAN			2572.4	3	0
IAVKVNHSY	34.24	1029.56	9	-0.2	344.194	26.53	4230000	4780000	Q8N2W9|PIAS4_HUMAN			96.3	0.3	1
ISAIPEQRW	31.03	1098.58	9	0.5	550.299	48.14	898000	34500000	O94953|KDM4B_HUMAN			11.8	0.02	1
ISGIKDFSW	31.99	1051.53	9	0.7	526.774	61.82	968000	10600000	P55884|EIF3B_HUMAN			23.9	0.06	1
ISGVHTVRF	33.09	1014.56	9	-0.1	508.288	33.28	35500000	36100000	Q2VIR3|IF2GL_HUMAN:P41091|IF2G_HUMAN			969.4	1.3	1
ISKALVAYY	42.39	1026.58	9	0.3	514.295	47.06	224000000	300000000	P62249|RS16_HUMAN			90.1	0.25	1
ISKEEAM(+15.99)RW	35	1164.56	9	-0.8	583.287	26.49	4410000	162000000	P62913|RL11_HUMAN	Oxidation (M)	M7:Oxidation (M):1000.00	12.2	0.025	1
ISKKADLLF	11.54	1033.62	9	1.6	517.817	40.1	2310000		Q96N46|TTC14_HUMAN			132.4	0.4	1
ISKKINTKF	34.59	1077.65	9	1.9	360.226	20.65	12300000	15100000	O00232|PSD12_HUMAN			93.5	0.3	1
ISKQFHHQL	55.44	1136.61	9	0.9	569.312	20.91	81000000	97500000	Q99613|EIF3C_HUMAN:B5ME19|EIFCL_HUMAN			391.1	0.7	1
ISKTHVYRF	29.31	1149.63	9	0.6	384.217	24.75	5880000	6800000	Q12830|BPTF_HUMAN			141.4	0.4	1
ISNKKEAKF	19.33	1063.6	9	-1.9	355.541	15.94	457000	317000	Q9UBU7|DBF4A_HUMAN			401.1	0.8	1
ISNPKTAEF	29.65	1005.51	9	-0.3	503.764	32.76	2560000	2840000	Q9NSD9|SYFB_HUMAN			619.2	1	1
ISNPTRHVY	28.6	1085.56	9	-0.3	362.861	23.3	2470000	1430000	Q04726|TLE3_HUMAN:Q04727|TLE4_HUMAN:Q04724|TLE1_HUMAN			133.2	0.4	1
ISPSRTEAL	27.83	972.524	9	-1.8	487.268	29.89	12500000	14500000	P01920|DQB1_HUMAN:P05538|DQB2_HUMAN			16605.4	16	0
ISQLKTLDL	10.65	1029.61	9	0.8	515.811	42.69	3510000		H0Y7S4|PRA26_HUMAN:Q5TYX0|PRAM5_HUMAN:Q5VXH4|PRAM6_HUMAN:A3QJZ7|PRA27_HUMAN:A6NGN4|PRA25_HUMAN:Q5VWM5|PRAM9_HUMAN:O60813|PRA11_HUMAN:O60810|PRAM4_HUMAN			11375.7	10	0
ISRAVVLVF	16.68	1002.62	9	-0.4	502.318	60.62	2300000	3080000	Q6NUK4|REEP3_HUMAN			54.9	0.175	1
ISRLYVPLY	26.13	1122.64	9	0.8	562.33	60.86	8180000	11100000	O95071|UBR5_HUMAN			539.6	0.9	1
ISRPIVNLF	23.88	1057.63	9	-1.3	529.821	61.38	8970000	20100000	Q9HCJ1|ANKH_HUMAN			17	0.04	1
ISRPNPPNF	33.24	1040.54	9	-0.7	521.277	41.53	7180000	7030000	Q8NEZ4|KMT2C_HUMAN			635.6	1	1
ISRPVPVRF	20.5	1069.64	9	-0.9	357.553	37.23	290000	2140000	Q7Z333|SETX_HUMAN			30.6	0.09	1
ISRSTNSNF	35.37	1024.49	9	-1.1	513.254	24.12	15700000	18800000	Q9Y232|CDYL_HUMAN			1067.2	1.4	1
ISRTPGVTY	14.38	992.529	9	2	497.273	32.02	811000		O75054|IGSF3_HUMAN			278.3	0.6	1
ISSTVQRQL	34.74	1030.58	9	2.5	516.297	29.79	6600000	7660000	Q6PJF5|RHDF2_HUMAN			302	0.6	1
ISTPVIRTF	32.13	1032.6	9	0.2	517.306	51.75	173000000	222000000	Q9NZB2|F120A_HUMAN			37	0.125	1
ISVAEVEKW	33.81	1059.56	9	-0.5	530.787	56.89	455000	9280000	Q99707|METH_HUMAN			10	0.015	1
ISVPIFKQF	39.83	1077.62	9	1.1	539.819	67.54	20400000	42600000	Q00341|VIGLN_HUMAN			44.5	0.15	1
ITAGAHRLW	42.29	1023.56	9	1.6	512.789	35.59	17300000	379000000	O00767|ACOD_HUMAN			7.9	0.01	1
ITHIVNQNF	36.91	1084.57	9	-0.7	543.29	42.21	21600000	26400000	Q9NTJ3|SMC4_HUMAN			1034.2	1.4	1
ITKTEVETF	17.47	1066.55	9	-0.3	534.284	38.53	2870000	2210000	Q14573|ITPR3_HUMAN			484.1	0.8	1
ITKTQKVRF	21.87	1119.68	9	0.8	374.233	19.51	1530000	483000	O60287|NPA1P_HUMAN			622.3	1	1
ITKTVVENI	46.01	1015.59	9	-0.6	508.803	37.44	35300000	42100000	P57740|NU107_HUMAN			10132.8	9	0
ITLQHYFR(+.98)T	10.85	1178.61	9	0.4	393.877	30.56	4580000		Q8IZT6|ASPM_HUMAN	Citrullination	R8:Citrullination:1000.00	2419.5	2.5	0
ITNHIHVRI	30.01	1101.64	9	-0.1	368.221	28.56	8110000	9150000	P49736|MCM2_HUMAN			1791.2	2	1
ITNKYQLVF	38.21	1124.62	9	-0.5	563.318	55.92	55400000	74700000	Q9NYV6|RRN3_HUMAN			313.2	0.6	1
ITRNLKLRF	33.69	1159.72	9	-2.5	387.579	34.26	41000000	54500000	Q53G44|IF44L_HUMAN			119.4	0.4	1
ITRQKQLFY	31.41	1195.67	9	1.4	399.565	32.05	14600000	16300000	Q9UBU8|MO4L1_HUMAN			744.9	1.1	1
ITTDVLYTI	33.5	1037.56	9	-0.6	519.789	72.05	4540000	6480000	P14866|HNRPL_HUMAN			1716.8	1.9	1
ITTKAISRW	43.34	1074.62	9	-1.2	538.316	33.26	36300000	822000000	P49368|TCPG_HUMAN			11.7	0.02	1
ITTTINPRF	30.23	1061.59	9	0.1	531.801	45.75	331000000	409000000	P26010|ITB7_HUMAN			296.3	0.6	1
ITTVIQHVF	38.8	1056.6	9	0.7	529.306	54.77	40000000	51300000	Q9H3R5|CENPH_HUMAN			44.6	0.15	1
ITTVVVQTF	22.67	1006.57	9	0.5	504.292	61.27	5120000	5990000	Q9Y6B7|AP4B1_HUMAN			147.3	0.4	1
ITVVSEKQF	26.16	1049.58	9	-1.3	525.794	42.68	2600000	3780000	Q6P5R6|RL22L_HUMAN			56.4	0.175	1
ITYQHIDRW	28.37	1230.61	9	-0.3	616.314	40.86	1070000	34600000	Q9UBQ5|EIF3K_HUMAN			22.2	0.06	1
K(+42.01)EARAVLTF	15.65	1075.6	9	1.3	538.809	35.56	5040000		Q9NQT4|EXOS5_HUMAN	Acetylation (N-term)	K1:Acetylation (N-term):1000.00	3835.8	3.5	0
K(+42.01)QTALASRF	10.84	1062.58	9	2.8	355.202	27.56	198000000		Q99613|EIF3C_HUMAN:B5ME19|EIFCL_HUMAN	Acetylation (N-term)	K1:Acetylation (N-term):1000.00	3955.9	4	0
K(+42.01)RGWKLQVS	10.77	1142.66	9	2.6	381.894	31.27	3390000		Q86TG7|PEG10_HUMAN	Acetylation (N-term)	K1:Acetylation (N-term):1000.00	492.7	0.9	1
KAALLNQHY	42.81	1056.57	9	-0.8	529.293	26.88	4210000	4440000	P07814|SYEP_HUMAN			552.4	0.9	1
KAAQKAKPV	14.54	939.587	9	-0.6	470.8	24.98	2700000		O14776|TCRG1_HUMAN			13091.3	12	0
KAASLKSNY	13.4	980.529	9	0.2	491.272	18.12	67800	150000	P36578|RL4_HUMAN			3262.7	3.5	0
KAASVRPVL	26.75	939.587	9	-0.2	470.8	24.7	5570000	7060000	Q9H269|VPS16_HUMAN			1955.9	2.5	0
KAAVM(+15.99)VHQL	32.88	1011.55	9	0.2	506.784	23.24	2340000	2590000	P35222|CTNB1_HUMAN	Oxidation (M)	M5:Oxidation (M):1000.00	2459.6	2.5	0
KAFDRPSLF	24.07	1079.58	9	-1.8	540.794	46.52	797000	2480000	Q8TBZ8|ZN564_HUMAN			210.6	0.5	1
KAFHSPRSY	14.41	1091.55	9	0	364.858	18.78	915000		Q8IYI8|ZN440_HUMAN			65.3	0.2	1
KAFQATLRW	20.92	1119.62	9	1.6	374.214	45.16	1370000	1250000	Q6PJG6|BRAT1_HUMAN			5.9	0.01	1
KAFTHTAQY	14.65	1065.52	9	0.5	533.77	21.14	489000	760000	P31939|PUR9_HUMAN			68	0.2	1
KAGQVVTIW	35.51	1000.57	9	-0.6	501.292	50.52	14800000	230000000	P02545|LMNA_HUMAN			17.4	0.04	1
KAIATTVTY	34.69	966.539	9	0.4	484.277	33.19	14500000	15800000	O43808|PM34_HUMAN			69.8	0.2	1
KAIEENNNF	38.15	1077.51	9	-0.1	539.762	28.42	2560000	2830000	P16949|STMN1_HUMAN:Q9H169|STMN4_HUMAN			850.4	1.2	1
KAIEKNVLF	49.89	1060.63	9	-0.4	531.321	35.6	81300000	100000000	P10644|KAP0_HUMAN			165.2	0.4	1
KAIETQPNF	45.83	1046.54	9	0.2	524.277	35.69	10600000	10800000	O15294|OGT1_HUMAN			564.3	0.9	1
KAINPINTF	31.33	1016.57	9	-0.9	509.289	45.76	21000000	69300000	Q07960|RHG01_HUMAN			80.2	0.25	1
KAKAKTYEF	43.45	1084.59	9	0.1	543.303	19.57	6720000	5250000	Q9HC52|CBX8_HUMAN			160.9	0.4	1
KAKDLILRF	27.66	1102.69	9	-0.6	368.569	40.31	12500000	41300000	Q9Y2H1|ST38L_HUMAN:Q15208|STK38_HUMAN			506.8	0.9	1
KAKEIYM(+15.99)TF	26.42	1145.58	9	-1.2	573.796	33.44	9300000	7660000	O43665|RGS10_HUMAN	Oxidation (M)	M7:Oxidation (M):1000.00	225.8	0.5	1
KAKEVFQRF	18.82	1151.64	9	-8.8	384.886	26.02	4380000	2970000	Q6ZN66|GBP6_HUMAN			438.1	0.8	1
KAKKEIEKF	35.69	1119.67	9	0.8	374.229	16.16	5740000	4630000	Q9UHW5|GPN3_HUMAN			282.2	0.6	1
KAKKIIETM(+15.99)	15.26	1076.63	9	0.5	539.321	17	67900		Q96Q89|KI20B_HUMAN	Oxidation (M)	M9:Oxidation (M):1000.00	2692.8	3	0
KAKPVTTNL	44.09	970.581	9	-0.5	486.298	20.1	14200000	19900000	Q8N0T1|CH059_HUMAN			2266.9	2.5	0
KAKQLTPRI	18.06	1053.67	9	0.7	352.229	20.82	1520000	1440000	Q86UX7|URP2_HUMAN			5043	4.5	0
KAKTIQQTL	22.71	1029.62	9	0.4	515.817	22.38	691000	1930000	Q9NQT5|EXOS3_HUMAN			466	0.8	1
KAKVVVELI	20.45	997.654	9	0.2	499.834	39.06	4360000	3420000	Q9BSI4|TINF2_HUMAN			1632.5	1.8	1
KALDNTPEF	13.68	1033.51	9	-0.3	517.761	38.99	262000	76600	Q86UL3|GPAT4_HUMAN			910.9	1.3	1
KALEENNNF	38.15	1077.51	9	-0.1	539.762	28.42	2560000	2830000	Q93045|STMN2_HUMAN:Q9NZ72|STMN3_HUMAN			424.7	0.8	1
KALELERKL	39.8	1098.68	9	1.6	367.233	27.17	31400000	40900000	Q9BWW8|APOL6_HUMAN			189	0.5	1
KALESIKEF	37.33	1063.59	9	0.2	532.803	35.18	6190000	9230000	Q92547|TOPB1_HUMAN			78.8	0.25	1
KALEVFPEF	35.59	1078.57	9	1	540.293	65.41	22700000	35400000	O15294|OGT1_HUMAN			346.1	0.7	1
KALEYVFKF	12.97	1143.63	9	-0.2	572.823	58.13	682000	1160000	Q92608|DOCK2_HUMAN			39.5	0.125	1
KALIYQKKY	34.21	1153.69	9	-0.2	385.569	21.67	4510000	5010000	Q99996|AKAP9_HUMAN:O95613|PCNT_HUMAN			67.2	0.2	1
KALKIKREL	12.35	1097.73	9	-1	366.916	18.75	900000		Q9ULX9|MAFF_HUMAN			353.7	0.7	1
KALKQRPRF	11.89	1142.7	9	-0.4	381.908	16.76	1120000	513000	O14647|CHD2_HUMAN			123.9	0.4	1
KALQDGRAY	28.27	1020.54	9	-1.8	341.185	19.47	704000	1470000	A5YKK6|CNOT1_HUMAN			645.8	1	1
KAM(+15.99)ELIREL	34.78	1117.62	9	-0.8	559.815	36.94	44700000	48300000	Q14691|PSF1_HUMAN	Oxidation (M)	M3:Oxidation (M):1000.00	858.7	1.2	1
KAM(+15.99)GIM(+15.99)NSF	24.48	1029.46	9	-0.7	515.738	30.45	10300000	12300000	P06899|H2B1J_HUMAN:O60814|H2B1K_HUMAN:Q99880|H2B1L_HUMAN:Q8N257|H2B3B_HUMAN	Oxidation (M)	M3:Oxidation (M):1000.00;M6:Oxidation (M):1000.00	2180.5	2.5	0
KANFTLPDV	12.41	1003.53	9	-0.1	502.774	30.75	1420000		Q9BUJ2|HNRL1_HUMAN			13008.6	12	0
KAPAPRPSL	10.64	935.555	9	-0.1	468.785	22.3	155000		Q92620|PRP16_HUMAN			7901.4	7	0
KAPSAARSL	19.84	899.519	9	0.9	450.767	18.93	3010000	3780000	Q9UQN3|CHM2B_HUMAN			5304.7	5	0
KAPVTVTSL	30.72	914.544	9	-2.5	458.278	37.35	2290000	2730000	P51610|HCFC1_HUMAN			5182.2	4.5	0
KARDINAVL	15.71	998.587	9	2.4	333.87	29.28	2870000	1910000	P55265|DSRAD_HUMAN			1454.3	1.7	1
KAREKVPKL	11.87	1067.68	9	-1.2	356.901	17.4	1900000		Q14790|CASP8_HUMAN			3701.8	3.5	0
KARHEVLLI	15.89	1077.67	9	0.5	360.229	28.95	501000	538000	Q00341|VIGLN_HUMAN			986.1	1.3	1
KARIQEAVY	34.86	1076.6	9	-1.4	539.305	25.1	42400000	50200000	Q8TEM1|PO210_HUMAN			209.5	0.5	1
KARKNVESF	14.05	1077.59	9	1.1	539.804	16.67	702000		O75427|LRCH4_HUMAN			141.5	0.4	1
KARLEVHRF	21.5	1154.67	9	0.3	385.897	20.85	2130000	3200000	Q8NDD1|CA131_HUMAN			58.9	0.175	1
KARLPLRLF	23.93	1112.72	9	0.3	371.913	44.23	12000000	26700000	O00767|ACOD_HUMAN			60.8	0.175	1
KARNLQAQY	12.52	1090.59	9	0.5	364.537	20.72	332000	122000	Q9H267|VP33B_HUMAN			58.7	0.175	1
KARPDLERI	14.6	1096.64	9	0.4	366.553	23.26	15600000	22600000	Q6SPF0|SAMD1_HUMAN			537.3	0.9	1
KARQLTVQM(+15.99)	20.54	1089.6	9	-0.6	545.805	18.75	6280000	9680000	P55209|NP1L1_HUMAN	Oxidation (M)	M9:Oxidation (M):1000.00	3103.8	3	0
KARYTVRSF	37.05	1126.62	9	-0.3	376.549	23.56	3730000	4770000	P62913|RL11_HUMAN			122.2	0.4	1
KASGTLREY	38.91	1023.53	9	0.2	512.775	20.17	93900000	114000000	Q02543|RL18A_HUMAN			338.9	0.7	1
KASPTQNLF	47.69	1004.53	9	-1	503.271	37.99	23500000	29200000	P05120|PAI2_HUMAN			21.4	0.05	1
KATVYEVIY	10.9	1084.58	9	-0.5	543.297	39.6	1290000		Q04726|TLE3_HUMAN:Q04727|TLE4_HUMAN:Q04724|TLE1_HUMAN			539.5	0.9	1
KAVKERYSY	19.61	1142.61	9	1.4	381.877	18.95	191000		P61158|ARP3_HUMAN			67.5	0.2	1
KAVSLQRKL	39.1	1041.67	9	0.1	348.229	20.72	20400000	24600000	Q14966|ZN638_HUMAN			326.7	0.7	1
KAVTHQVKF	42.75	1056.61	9	1.4	353.21	18.81	1730000	897000	Q8WU90|ZC3HF_HUMAN			148.2	0.4	1
KAYEIEKRL	36.24	1148.66	9	1.9	383.893	25.36	10400000	12500000	Q9UPP1|PHF8_HUMAN			115.5	0.3	1
KAYGASKTF	43.11	971.508	9	-1.2	486.76	20.03	846000	1250000	P27694|RFA1_HUMAN			32.5	0.1	1
KAYPKRPLL	45.35	1084.68	9	0.2	362.566	22.43	62700000	93000000	Q9GZR7|DDX24_HUMAN			460.2	0.8	1
KAYSEAHEI	46.33	1046.5	9	-0.1	524.259	21.87	2770000	3670000	P61981|1433G_HUMAN			571.3	0.9	1
KEIAKTVLI	13.9	1013.65	9	-0.4	507.831	38.61	39300000		Q96JB1|DYH8_HUMAN			19336.9	21	0
KGKPVRIM(+15.99)W	30.22	1129.64	9	1.2	377.555	26.24	7300000	188000000	Q9H361|PABP3_HUMAN:P11940|PABP1_HUMAN	Oxidation (M)	M8:Oxidation (M):1000.00	49.3	0.15	1
KIEEFLSSF	10.2	1098.56	9	-0.2	550.287	33.07	292000		O43847|NRDC_HUMAN			11324.7	10	0
KIKDFASHF	34.99	1091.58	9	1.5	364.867	32.28	4390000	818000	Q8ND82|Z280C_HUMAN			11448.8	10	0
KIKPVSLTF	29.32	1031.64	9	1	516.827	43.01	3180000	4530000	O60449|LY75_HUMAN			1680	1.9	1
KIKYPENFF	35.4	1184.62	9	-1.7	593.318	49.57	8730000	20900000	P36873|PP1G_HUMAN:P62140|PP1B_HUMAN:P62136|PP1A_HUMAN			7857	7	0
KILDLQRKL	10.45	1125.72	9	1.2	376.249	29.57	4640000		Q5VVM6|CCD30_HUMAN			8167	7	0
KILPFSPEF	24.81	1076.59	9	0.5	539.303	69.39	770000	1180000	Q13395|TARB1_HUMAN			1179.4	1.5	1
KISNIIKQF	29.62	1089.65	9	0.5	545.835	42.19	10400000	16900000	Q7L523|RRAGA_HUMAN:Q5VZM2|RRAGB_HUMAN			960.5	1.3	1
KISVRTVTI	11.01	1015.64	9	1.5	339.554	32.7	6560000	3310000	Q9HC07|TM165_HUMAN			10300.3	9	0
KKSAIGQR(+.98)I	11.26	1000.6	9	-0.2	334.541	22.03	187000		P30876|RPB2_HUMAN	Citrullination	R8:Citrullination:1000.00	2001.6	2.5	0
KLKPVADRF	27.94	1072.64	9	0.4	358.554	23.82	401000	759000	Q9H869|YYAP1_HUMAN			6700.6	6	0
KLKQDGDSF	14.55	1036.52	9	-0.3	346.514	20.18	221000		Q14204|DYHC1_HUMAN			16007.3	16	0
KLMKAFESL	16.6	1065.59	9	0	533.802	29.49	497000	286000	P42858|HD_HUMAN			14196.6	13	0
KLQAQDPQI	15.28	1039.57	9	0.1	520.79	34.23	409000	498000	Q9C0G6|DYH6_HUMAN			18382.7	19	0
KLSPPSITI	10.76	954.575	9	0.7	478.295	44.67	2420000		O43497|CAC1G_HUMAN			10018.2	8.5	0
KMKLNETSF	10.89	1096.56	9	-0.5	366.527	25.96	475000		Q8TBC3|SHKB1_HUMAN			1739.4	1.9	1
KPNYSLNLW	16.39	1133.59	9	-1.6	567.8	51.84	74500	7560000	P22059|OSBP1_HUMAN:Q969R2|OSBP2_HUMAN			968.3	1.3	1
KR(+.98)LGADWKL	11.25	1086.62	9	-1.6	363.213	34.13	8710000	1130000	P41225|SOX3_HUMAN	Citrullination	R2:Citrullination:1000.00	532.4	0.9	1
KSAAKESLY	37.02	995.529	9	0.7	498.772	20.7	4280000	5160000	Q12772|SRBP2_HUMAN			145.9	0.4	1
KSAEIRRSL	14.94	1058.62	9	1.2	353.881	19.41	680000	799000	Q7RTP6|MICA3_HUMAN			409.3	0.8	1
KSAEIYPIM(+15.99)	30.27	1066.54	9	1	534.276	38.98	10400000	11000000	P29466|CASP1_HUMAN	Oxidation (M)	M9:Oxidation (M):1000.00	733.1	1.1	1
KSAQPIEKF	47.1	1046.58	9	-1.7	524.294	24.82	18100000	21400000	Q00534|CDK6_HUMAN			164	0.4	1
KSARKIDAF	41.5	1034.59	9	0.2	518.301	20.22	8640000	5620000	P42345|MTOR_HUMAN			1246.2	1.5	1
KSDSRASVF	10.34	995.504	9	-0.4	498.759	28.56	1380000		Q9NZ56|FMN2_HUMAN			3646.5	3.5	0
KSESR(+.98)SPVQ	12.14	1017.51	9	1.4	509.762	22.41	855000		Q96MT7|CFA44_HUMAN	Citrullination	R5:Citrullination:1000.00	3534.5	3.5	0
KSFADINLY	33.97	1069.54	9	1	535.78	57.09	22800000	31500000	P01111|RASN_HUMAN			12	0.025	1
KSFDNIRNW	33.32	1178.58	9	0.9	590.299	40.4	345000	21700000	P61006|RAB8A_HUMAN			14	0.03	1
KSFEDIHHY	20.26	1174.54	9	0.9	392.521	25.71	2540000	780000	P01116|RASK_HUMAN			23.4	0.06	1
KSFENISKW	44.08	1137.58	9	-0.5	569.798	38.68	5660000	116000000	P61026|RAB10_HUMAN			5.4	0.01	1
KSFGGSHVM(+15.99)	17.24	964.444	9	-2.9	483.228	16.94	135000	282000	C9J798|RAS4B_HUMAN:O43374|RASL2_HUMAN	Oxidation (M)	M9:Oxidation (M):1000.00	316.8	0.6	1
KSFGSAQEF	35.14	999.466	9	0	500.74	35.5	6480000	8370000	P35606|COPB2_HUMAN			39.5	0.125	1
KSFKKKFFY	36.13	1221.69	9	-1.8	611.852	24.55	16200000	20400000	Q8N1G2|CMTR1_HUMAN			71.3	0.25	1
KSFKKRYTF	15.34	1203.68	9	0.6	402.233	19.28	331000	573000	Q9H4Z2|ZN335_HUMAN			12.5	0.025	1
KSFNRHLHF	15.76	1184.62	9	0.8	395.881	22.75	3210000	1850000	P06737|PYGL_HUMAN:P11216|PYGB_HUMAN			40.6	0.125	1
KSFPGGKEY	31.65	1011.5	9	-0.7	506.758	21.54	5310000	6840000	Q9BXS5|AP1M1_HUMAN:Q9Y6Q5|AP1M2_HUMAN			56.8	0.175	1
KSFQAIHQF	42.41	1104.57	9	-0.8	553.293	33.53	16300000	21300000	Q6IPU0|CENPP_HUMAN			9.3	0.015	1
KSFVKVYNY	61.47	1146.61	9	0.5	574.311	36.72	484000000	625000000	P61353|RL27_HUMAN			81.2	0.25	1
KSFVTKRSL	29.83	1064.63	9	1.1	355.886	21.2	3190000	4070000	O95625|ZBT11_HUMAN			55.9	0.175	1
KSFYDARLL	14.6	1111.6	9	-0.6	556.808	47.21	2760000	6380000	Q86V97|KBTB6_HUMAN:Q8WVZ9|KBTB7_HUMAN			85.2	0.25	1
KSGSPVATF	28.07	892.465	9	-0.2	447.24	32.59	1730000	1850000	Q9BQ67|GRWD1_HUMAN			205.6	0.5	1
KSHFRNHKF	19.37	1199.63	9	0	400.884	16.65	4150000	3580000	Q5JTD0|TJAP1_HUMAN			128.2	0.4	1
KSHTVVIGF	27.72	986.555	9	-1	494.284	37.05	3480000	4240000	Q8NG31|KNL1_HUMAN			239.5	0.6	1
KSIDC(+119.00)IRAF	17.12	1170.55	9	-2.1	391.191	36.68	351000	340000	P13010|XRCC5_HUMAN	Cysteinylation	C5:Cysteinylation:1000.00	952.1	1.3	1
KSIDLIQKW	39.02	1129.65	9	0.4	565.832	47.73	1740000	47500000	P49585|PCY1A_HUMAN			11.9	0.02	1
KSIHIVVTM	38.53	1026.59	9	-0.1	514.302	39.25	4200000	4150000	Q13291|SLAF1_HUMAN			121.9	0.4	1
KSIHIVVTM(+15.99)	54.44	1042.58	9	1.3	522.3	28.04	92500000	118000000	Q13291|SLAF1_HUMAN	Oxidation (M)	M9:Oxidation (M):1000.00	1205.1	1.5	1
KSINIIKKY	22.76	1105.69	9	0.7	369.57	23.69	1070000	1830000	P49642|PRI1_HUMAN			35.1	0.1	1
KSIRNDIEW	27.17	1159.6	9	0.8	580.807	38.04	2430000	28300000	Q9NPA3|M1IP1_HUMAN			12	0.025	1
KSKAIIEEY	42.16	1079.59	9	0.8	540.801	28.11	18200000	22900000	Q04637|IF4G1_HUMAN			139	0.4	1
KSKAIM(+15.99)AKY	11.6	1054.58	9	1.6	352.536	17.27	111000		Q9BVJ6|UT14A_HUMAN:Q5TAP6|UT14C_HUMAN	Oxidation (M)	M6:Oxidation (M):1000.00	86.6	0.25	1
KSKDFVQVM(+15.99)	51.72	1096.56	9	1.1	549.287	25.46	107000000	134000000	P78527|PRKDC_HUMAN	Oxidation (M)	M9:Oxidation (M):1000.00	1548.9	1.8	1
KSKDILVDL	22.57	1029.61	9	-0.5	515.811	42.15	7710000	14200000	Q9NPA3|M1IP1_HUMAN			3650.9	3.5	0
KSKDISKTF	41.49	1052.59	9	0.8	527.301	19.48	5890000	8090000	Q14651|PLSI_HUMAN			145.7	0.4	1
KSKENPRNF	25.96	1118.58	9	1.4	373.869	16.86	650000	497000	P37802|TAGL2_HUMAN			1146.5	1.5	1
KSKFVLVKF	11.63	1094.69	9	0.2	365.902	38.45	717000	967000	P30040|ERP29_HUMAN			120.8	0.4	1
KSKGLANVF	37.31	962.555	9	2.6	482.286	32.28	12000000	14000000	Q03169|TNAP2_HUMAN			95.4	0.3	1
KSKILKQVI	33.1	1055.71	9	-0.5	528.86	24.17	16000000	13000000	P52701|MSH6_HUMAN			1668.7	1.9	1
KSKITHPVY	52.31	1071.61	9	-1	536.811	19.29	21200000	27400000	Q9UGP8|SEC63_HUMAN			426.2	0.8	1
KSKKISLKY	25.8	1093.69	9	-0.6	365.569	19.08	506000	446000	P46940|IQGA1_HUMAN			130	0.4	1
KSKLSQNNF	41.72	1064.56	9	2.7	533.289	21.17	12000000	7350000	Q9Y277|VDAC3_HUMAN			753.4	1.1	1
KSKLTRNNF	21.05	1106.62	9	0.3	554.317	18.6	14200000	9890000	P45880|VDAC2_HUMAN			1104.5	1.4	1
KSKNILFVI	40.03	1060.66	9	-0.3	531.339	52.4	163000000	230000000	O15069|NACAD_HUMAN:E9PAV3|NACAM_HUMAN:Q9BZK3|NACP4_HUMAN:Q13765|NACA_HUMAN:Q9H009|NACA2_HUMAN			520.1	0.9	1
KSKNILVRM(+15.99)	31.75	1103.65	9	0.6	368.89	18.79	7400000	8970000	O75394|RM33_HUMAN	Oxidation (M)	M9:Oxidation (M):1000.00	1542.7	1.8	1
KSKPDKQLI	17.54	1055.63	9	0.7	352.885	17.4	1640000	1470000	Q03933|HSF2_HUMAN			550.7	0.9	1
KSKTLQEFL	18.98	1092.62	9	1.7	547.317	41.66	11000000	10700000	Q9NSI8|SAMN1_HUMAN			854.2	1.2	1
KSKVSEQRY	26.21	1123.6	9	-0.4	375.54	15.16	200000	269000	Q9HA38|ZMAT3_HUMAN			176.7	0.5	1
KSKYFESKF	41.54	1162.6	9	-0.2	388.541	27.56	18300000	22800000	P09326|CD48_HUMAN			142.8	0.4	1
KSLAKLPEF	15.08	1031.6	9	0.9	516.808	42.25	894000	456000	Q6TFL4|KLH24_HUMAN			69.1	0.2	1
KSLALLLNY	25.4	1033.62	9	-0.4	517.816	63.3	4080000	6350000	Q9UBU8|MO4L1_HUMAN			84.1	0.25	1
KSLANKR(+.98)AF	18.79	1034.59	9	0	518.301	20.1	1740000	738000	O60293|ZC3H1_HUMAN	Citrullination	R7:Citrullination:1000.00	91.3	0.25	1
KSLDTTLQF	16.05	1051.55	9	-1.4	526.784	52.66	1610000	1190000	P15498|VAV_HUMAN			69.9	0.2	1
KSLEEIYLF	27.89	1140.61	9	1.6	571.312	68.84	26200000	55300000	P15880|RS2_HUMAN			9.6	0.015	1
KSLELHEEF	20.1	1130.56	9	-0.9	566.287	37.23	732000	1620000	P53367|ARFP1_HUMAN			61.7	0.2	1
KSLENQTYF	17.82	1128.55	9	-2.6	565.278	42.34	2190000	4560000	Q99996|AKAP9_HUMAN			22.1	0.06	1
KSLGADFTF	16.3	984.492	9	0.5	493.253	56.49	332000	1110000	Q96T76|MMS19_HUMAN			14.7	0.03	1
KSLGVHYVF	10.63	1048.57	9	0.8	525.293	42.31	649000		Q9UHQ1|NARF_HUMAN			10.3	0.015	1
KSLGVTTKF	51.25	979.57	9	-0.5	490.792	31.16	19600000	22900000	Q5VWZ2|LYPL1_HUMAN			17.1	0.04	1
KSLILTRAF	19.45	1047.64	9	0.9	524.83	43.71	1510000	619000	Q8IWI9|MGAP_HUMAN			69.5	0.2	1
KSLM(+15.99)IKREL	14.61	1132.66	9	-0.7	378.562	22.74	2700000	2040000	Q13601|KRR1_HUMAN	Oxidation (M)	M4:Oxidation (M):1000.00	481	0.8	1
KSLPASITM(+15.99)	20.58	962.511	9	-0.5	482.262	30.76	287000	176000	Q9BZ95|NSD3_HUMAN	Oxidation (M)	M9:Oxidation (M):1000.00	363.5	0.7	1
KSLPASLSF	20.18	948.528	9	0.4	475.272	51.52	1020000	1470000	Q14160|SCRIB_HUMAN			12	0.025	1
KSLPDTELM(+15.99)	33.84	1048.51	9	1.7	525.264	33.49	10400000	12900000	P46013|KI67_HUMAN	Oxidation (M)	M9:Oxidation (M):1000.00	382.9	0.7	1
KSM(+15.99)ETKVQF	43.09	1112.55	9	-0.2	557.284	23.88	27100000	30200000	Q15782|CH3L2_HUMAN	Oxidation (M)	M3:Oxidation (M):1000.00	54.9	0.175	1
KSM(+15.99)KVVKLF	32.42	1094.65	9	-0.4	365.891	26.67	17100000	18000000	Q9Y291|RT33_HUMAN	Oxidation (M)	M3:Oxidation (M):1000.00	42.7	0.125	1
KSMETKVQF	34.88	1096.56	9	-0.2	549.287	29.13	26500000	7060000	Q15782|CH3L2_HUMAN			41.8	0.125	1
KSNYVQRFH	12.58	1177.6	9	-2.1	393.54	19.76	82800		Q92608|DOCK2_HUMAN			2537	2.5	0
KSPR(+.98)ATRKF	12.73	1090.62	9	-1	364.548	20.75	195000		Q13972|RGRF1_HUMAN	Citrullination	R4:Citrullination:22.45	559	0.9	1
KSQDLELSW	26.38	1104.55	9	-0.2	553.28	55.62	3930000	31100000	P06734|FCER2_HUMAN			16.7	0.04	1
KSRDYEREI	29.16	1194.6	9	0.6	598.307	21.22	154000000	193000000	Q9NRZ9|HELLS_HUMAN			3434.3	3.5	0
KSREEDPTL	21.6	1073.54	9	-0.8	537.774	21.44	3120000	4740000	Q9NWQ8|PHAG1_HUMAN			1299.9	1.6	1
KSREFNLM(+15.99)Y	19.54	1202.58	9	-0.2	602.295	37.44	17600000	16300000	O14896|IRF6_HUMAN	Oxidation (M)	M8:Oxidation (M):1000.00	137.6	0.4	1
KSRELNTRF	19.08	1149.63	9	0.7	384.216	20.45	13400000	16600000	Q8IXQ4|GPAM1_HUMAN			34.6	0.1	1
KSRGVLHQF	29.3	1070.6	9	0	536.307	21.94	155000000	180000000	P27144|KAD4_HUMAN			12.8	0.025	1
KSRKLAVNF	37.34	1061.63	9	0.6	531.825	25.43	99300000	110000000	Q8IZH2|XRN1_HUMAN			140.5	0.4	1
KSRLSISGW	38.47	1032.57	9	0.4	517.293	39.49	2770000	26900000	Q8N543|OGFD1_HUMAN			9.5	0.015	1
KSRPELLEY	27.48	1133.61	9	0.2	567.811	36.02	25500000	30000000	Q14258|TRI25_HUMAN			70.2	0.2	1
KSRPEVITF	26.78	1075.6	9	-0.6	538.808	36.28	8150000	7130000	Q9UL36|ZN236_HUMAN			32.9	0.1	1
KSRPIIKRF	28.26	1143.72	9	0.3	382.249	19.33	68000000	76200000	Q9P2P5|HECW2_HUMAN:Q76N89|HECW1_HUMAN			9.4	0.015	1
KSRPLRIRF	14.91	1171.73	9	-1.1	391.584	23	10900000		Q8WXF1|PSPC1_HUMAN			28	0.08	1
KSRRLQDSF	11.4	1135.61	9	1.4	379.544	21.1	2300000	8690000	Q92621|NU205_HUMAN			39.1	0.125	1
KSRVTQSNF	39.35	1065.56	9	0.2	533.786	18.73	28900000	35500000	P21796|VDAC1_HUMAN			184.5	0.5	1
KSSASLVLL	12.5	916.559	9	0.5	459.287	26.83	373000	598000	Q9NP58|ABCB6_HUMAN			175.5	0.4	1
KSSDIAKTF	54.03	995.529	9	1.1	498.772	25.72	448000000	512000000	P13797|PLST_HUMAN			71.9	0.25	1
KSSDKLRQI	15.58	1073.62	9	1	358.881	21.14	1210000		O95466|FMNL1_HUMAN			2549.2	2.5	0
KSSDVYVSY	18.96	1046.49	9	0.8	524.254	36.01	340000	0	Q92673|SORL_HUMAN			788.9	1.1	1
KSSEILKSL	20.8	1003.59	9	-0.5	502.803	31.62	330000	327000	Q6UWE0|LRSM1_HUMAN			190.1	0.5	1
KSSEVFTTF	44.11	1044.51	9	-1.7	523.263	47.61	88100000	112000000	P40222|TXLNA_HUMAN			134	0.4	1
KSSKIM(+15.99)ESF	43.24	1071.53	9	0.4	536.771	23.63	10900000	6340000	P05023|AT1A1_HUMAN:P13637|AT1A3_HUMAN:Q13733|AT1A4_HUMAN	Oxidation (M)	M6:Oxidation (M):1000.00	29.8	0.09	1
KSSKIMESF	27.58	1055.53	9	0.7	528.774	29.78	490000	280000	P05023|AT1A1_HUMAN:P13637|AT1A3_HUMAN:Q13733|AT1A4_HUMAN			14.9	0.03	1
KSSNVVRSF	28.59	1022.55	9	0.5	512.283	23.15	1600000	1830000	Q86XI2|CNDG2_HUMAN			47.3	0.15	1
KSSQPKPVI	37.19	982.581	9	0.7	492.298	19.56	2230000	2470000	Q9NR82|KCNQ5_HUMAN			3089.3	3	0
KSSQVQRRF	24.74	1134.63	9	1.8	379.217	17.6	37100000	37200000	P13010|XRCC5_HUMAN			50.9	0.15	1
KSSRKTYTF	21.85	1116.59	9	1.8	559.305	18.47	1030000	2780000	P52732|KIF11_HUMAN			26.6	0.07	1
KSSTVLHTF	43.93	1018.54	9	-1.8	510.279	28.73	11500000	11300000	Q9Y4C1|KDM3A_HUMAN			18.3	0.04	1
KSTAISLFY	15.2	1028.55	9	0.1	515.284	57.31	1800000	9470000	P13639|EF2_HUMAN			142.3	0.4	1
KSTDVAKTF	55.6	995.529	9	0.2	498.772	23.24	746000000	780000000	P13796|PLSL_HUMAN			128.2	0.4	1
KSVEGRPM(+15.99)F	12.95	1065.53	9	0.9	533.772	23.38	1120000	1310000	Q15020|SART3_HUMAN	Oxidation (M)	M8:Oxidation (M):1000.00	85.4	0.25	1
KSVGVFEAF	15.17	982.512	9	-1.5	492.263	56.2	762000	2160000	O14972|DSCR3_HUMAN			538.1	0.9	1
KSVKRGFEF	21.15	1096.6	9	-0.7	549.308	24.86	909000	1290000	Q16181|SEPT7_HUMAN			109.8	0.3	1
KSVKVFAEY	33.97	1069.58	9	-1.6	535.797	32.35	4270000	5020000	Q9H583|HEAT1_HUMAN			256	0.6	1
KSVKVSENF	18.58	1036.56	9	0.4	519.285	25.13	320000	1010000	Q9HBG7|LY9_HUMAN			278.2	0.6	1
KSVKYTVNF	23.04	1084.59	9	0.9	543.304	34.46	3220000	4040000	Q86X55|CARM1_HUMAN			452.2	0.8	1
KSVLVKQTI	43.93	1014.64	9	0.7	508.329	26.81	8160000	10100000	Q9UHX1|PUF60_HUMAN			593.7	1	1
KSVTAFFKW	34	1112.6	9	1	557.309	56.58	2180000	12900000	Q04637|IF4G1_HUMAN			9.5	0.015	1
KSVTKIYNY	14.48	1114.6	9	-2	558.307	27.33	273000	2190000	P37837|TALDO_HUMAN			342.6	0.7	1
KSVTLGYLF	32.37	1026.58	9	-0.1	514.295	64.17	22400000	38700000	P55265|DSRAD_HUMAN			15.4	0.03	1
KSWVFGVHF	24.24	1105.57	9	-0.7	553.792	60.85	1190000	7160000	P32248|CCR7_HUMAN			20.2	0.05	1
KSYAGEKIL	36.25	1007.57	9	-1.3	504.789	28.88	5080000	6120000	Q9NTJ3|SMC4_HUMAN			158.6	0.4	1
KSYGNEKRF	38.77	1127.57	9	0	376.865	18.18	5520000	7640000	Q06330|SUH_HUMAN:Q9UBG7|RBPJL_HUMAN			24.4	0.07	1
KSYKGRQII	11.32	1091.65	9	-0.2	364.889	19.87	305000		Q14683|SMC1A_HUMAN			1089.7	1.4	1
KSYVQGVTW	37.48	1066.54	9	-1.2	534.279	48.04	4740000	59400000	Q13112|CAF1B_HUMAN			4.8	0.01	1
KTAEDM(+15.99)NLF	27.33	1083.49	9	1.1	542.753	38.67	12700000	15900000	O95864|FADS2_HUMAN	Oxidation (M)	M6:Oxidation (M):1000.00	118	0.3	1
KTAEELM(+15.99)NF	29.06	1097.51	9	-0.2	549.76	37.91	12800000	15500000	P50990|TCPQ_HUMAN	Oxidation (M)	M7:Oxidation (M):1000.00	429	0.8	1
KTAENFRQF	29.62	1139.57	9	1.4	570.794	28.36	8730000	13400000	O43447|PPIH_HUMAN			231.3	0.5	1
KTAGKRYVY	19.08	1084.6	9	0.2	543.309	17.96	2280000	1880000	P14921|ETS1_HUMAN			204	0.5	1
KTAPFDSRF	39.65	1067.54	9	-0.7	534.777	33.23	82800000	95400000	P14854|CX6B1_HUMAN			37.8	0.125	1
KTARVEATL	10.21	987.571	9	1	494.793	22.13	262000		O60522|TDRD6_HUMAN			77.5	0.25	1
KTATHAVVF	15.33	972.539	9	0.4	487.277	24.93	837000	635000	O15254|ACOX3_HUMAN			203.3	0.5	1
KTAVVVGTI	37.08	886.549	9	-1.2	444.281	36.46	14700000	18800000	Q07020|RL18_HUMAN			1571	1.8	1
KTFPYQHRY	42.15	1238.62	9	0.5	413.881	22.64	39000000	45200000	Q8NI27|THOC2_HUMAN			10	0.015	1
KTFQGKPIM(+15.99)	42.74	1064.57	9	-0.6	533.291	19.74	14400000	29900000	Q71RC2|LARP4_HUMAN	Oxidation (M)	M9:Oxidation (M):1000.00	313	0.6	1
KTFRIKRFL	22.55	1207.76	9	1.1	403.593	31.68	276000000	475000000	P62891|RL39_HUMAN			50.3	0.15	1
KTFRPKRKF	18.16	1206.73	9	0.1	403.252	17.32	2570000	1480000	Q86TA1|MOB3B_HUMAN:Q96BX8|MOB3A_HUMAN			16.6	0.04	1
KTFSIPQDS	10.25	1021.51	9	-1.2	511.761	37	585000		Q8NAP3|ZBT38_HUMAN			5920	5	0
KTFTIKRFL	33.26	1152.7	9	0.7	385.241	40.34	15600000	27100000	Q96EH5|RL39L_HUMAN			102.5	0.3	1
KTFTTQETI	46.51	1067.55	9	-0.7	534.782	33.7	45500000	39900000	P06744|G6PI_HUMAN			89.1	0.25	1
KTFVQKQTL	44.32	1091.63	9	1.1	546.825	24.2	2890000	3700000	Q8N1W2|ZN710_HUMAN			119.2	0.3	1
KTGNVVKRF	19.19	1047.62	9	-1	350.213	18	633000	374000	Q8NA23|WDR31_HUMAN			91.8	0.3	1
KTHAVLVAL	19.24	950.591	9	-0.2	476.303	34.69	828000	419000	P25786|PSA1_HUMAN			824.9	1.2	1
KTIDNQRVY	24.34	1135.6	9	-0.7	568.806	23.32	2650000	3210000	Q9H9Y2|RPF1_HUMAN			306.8	0.6	1
KTIEDVREF	17.47	1135.59	9	-0.7	568.801	36.54	674000	556000	Q96NW4|ANR27_HUMAN			171.5	0.4	1
KTIGYDPII	16.58	1018.57	9	-0.3	510.292	51.12	4740000	0	O43175|SERA_HUMAN			2545.7	2.5	0
KTIIKKLFF	17.02	1136.73	9	0.7	379.918	41.94	3280000	14300000	Q969X0|RIPL2_HUMAN			306.4	0.6	1
KTIKLWKSD	14.64	1117.65	9	-0.6	373.557	36.53	1800000	2560000	P61964|WDR5_HUMAN			1051.7	1.4	1
KTITDVINI	13.94	1015.59	9	-0.9	508.803	37.15	14800000	1610000	P06744|G6PI_HUMAN			5182.1	4.5	0
KTIVM(+15.99)GASF	31.41	968.5	9	-2.2	485.256	37.53	7950000	8630000	P37837|TALDO_HUMAN	Oxidation (M)	M5:Oxidation (M):1000.00	218.5	0.5	1
KTKAAVVTL	23.51	929.591	9	-0.3	465.803	23.97	2470000	2040000	Q8IZT6|ASPM_HUMAN			400.7	0.8	1
KTKDGVVEI	32.97	987.56	9	-1.4	494.787	26	15500000	15400000	P04792|HSPB1_HUMAN			12210.7	11	0
KTKEAVLLL	27.84	1013.65	9	-0.4	507.831	38.61	85000000	91300000	P36578|RL4_HUMAN			747.7	1.1	1
KTKEIEQVY	46.07	1136.61	9	0.1	569.311	25.3	1170000000	1380000000	Q8NEY8|PPHLN_HUMAN			154.7	0.4	1
KTKEIQSVY	18.34	1094.6	9	0.3	548.306	23.2	1610000	2330000	Q9BRQ0|PYGO2_HUMAN			223.7	0.5	1
KTKETIQVL	14.6	1058.63	9	0.4	530.324	28.46	281000	1550000	Q02224|CENPE_HUMAN			1056	1.4	1
KTKEVADC(+119.00)F	37.33	1158.5	9	-0.2	580.26	22.77	9870000	14100000	P49792|RBP2_HUMAN	Cysteinylation	C8:Cysteinylation:1000.00	113.2	0.3	1
KTKEVIQEW	39.37	1159.62	9	-0.1	580.819	31.97	641000	71200000	Q9Y490|TLN1_HUMAN			10.1	0.015	1
KTKEVLQEW	39.37	1159.62	9	-0.1	580.819	31.97	641000	71200000	Q9Y4G6|TLN2_HUMAN			10.9	0.02	1
KTKFEQHTI	18.41	1130.61	9	-0.7	377.877	20.53	8720000	9460000	Q8IWA4|MFN1_HUMAN			709.6	1.1	1
KTKFPAEQY	53.74	1110.57	9	0.1	556.293	27.97	62800000	74400000	Q15631|TSN_HUMAN			729.9	1.1	1
KTKGFEVYL	13.09	1083.6	9	0.8	542.806	44.04	3180000	4030000	P49750|YLPM1_HUMAN			284.1	0.6	1
KTKGFHTTI	45.7	1031.58	9	0.3	516.796	18.81	57200000	40700000	Q15417|CNN3_HUMAN			592.5	1	1
KTKIEVIRM(+15.99)	23.5	1132.66	9	-0.3	378.562	21.55	12900000	3920000	Q16513|PKN2_HUMAN	Oxidation (M)	M9:Oxidation (M):1000.00	1969.6	2.5	0
KTKKIKEKY	44.16	1164.72	9	0.2	389.248	13.93	2260000	4020000	P08238|HS90B_HUMAN:Q58FF6|H90B4_HUMAN:Q58FF8|H90B2_HUMAN			248.5	0.6	1
KTKKPLLIY	18.07	1102.71	9	0.3	552.363	28.42	5900000	4420000	Q9BSR8|YIPF4_HUMAN			295.3	0.6	1
KTKKSLELS	13.93	1032.62	9	1.4	517.317	18.57	20100000	18400000	Q7Z7B0|FLIP1_HUMAN			9807.5	8.5	0
KTKKSLESI	45.75	1032.62	9	-1.1	517.316	18.35	234000000	289000000	P62888|RL30_HUMAN			1845.9	2	1
KTKNAVEKF	41.62	1063.6	9	1	532.809	16.65	10500000	8950000	Q7Z7A1|CNTRL_HUMAN			204.6	0.5	1
KTKPIHTII	13.91	1049.66	9	1.7	350.894	21.53	9840000	9140000	Q8IWI9|MGAP_HUMAN			267.8	0.6	1
KTKPSPSQF	17.76	1018.54	9	-0.5	510.279	19.06	340000	325000	Q8TCS8|PNPT1_HUMAN			117.6	0.3	1
KTKQTISLF	14.38	1064.62	9	-1.4	533.318	38.05	1890000	502000	P22681|CBL_HUMAN			133.2	0.4	1
KTKSVVLQL	13.59	1014.64	9	-1.2	508.329	34.82	4430000	6760000	O95163|ELP1_HUMAN			621	1	1
KTKVEPYSL	31.07	1063.59	9	0.3	532.803	28.67	5090000	7270000	Q96T88|UHRF1_HUMAN			288.9	0.6	1
KTKVIELLY	14.94	1105.67	9	0.6	553.845	45.86	5100000	4270000	Q9NZ52|GGA3_HUMAN			56.3	0.175	1
KTKVQEEKI	28.31	1101.64	9	-0.1	368.22	16.65	1880000	1620000	Q8TCG1|CIP2A_HUMAN			2316.4	2.5	0
KTLDVDATY	22.39	1024.51	9	-0.3	513.261	37.81	3020000	3600000	P18858|DNLI1_HUMAN			92.5	0.3	1
KTLELPHVF	46.8	1082.61	9	0.2	542.314	53.97	26300000	43700000	O43913|ORC5_HUMAN			18.2	0.04	1
KTLERSYLL	23	1121.64	9	0.4	561.83	37.03	23200000	31500000	P23921|RIR1_HUMAN			83.8	0.25	1
KTLHETVNF	20.29	1087.57	9	0.3	544.79	30.81	6810000	3860000	Q9UBW7|ZMYM2_HUMAN			199.2	0.5	1
KTLNAHEHF	15.36	1095.55	9	0.6	366.19	20.04	262000	680000	P43034|LIS1_HUMAN			51.4	0.15	1
KTLNYTARF	11.39	1112.6	9	-0.7	557.306	33.96	276000		O15514|RPB4_HUMAN			33.1	0.1	1
KTLPAKAKI	31.8	968.638	9	-1.1	323.886	19.03	568000	1090000	Q5T4S7|UBR4_HUMAN			76.8	0.25	1
KTLPDILTF	23.84	1046.6	9	-0.5	524.308	68.51	11300000	18900000	Q13569|TDG_HUMAN			13.7	0.03	1
KTLQKRDSF	11.48	1121.62	9	2.1	374.881	17.05	814000		O94804|STK10_HUMAN			495.8	0.9	1
KTLRAM(+15.99)LVY	13.35	1109.63	9	1.6	555.822	34.52	2560000	3210000	Q13233|M3K1_HUMAN	Oxidation (M)	M6:Oxidation (M):1000.00	40.3	0.125	1
KTM(+15.99)KQQLQF	29.69	1166.61	9	0.1	584.313	24.94	9020000	17600000	A4D1P6|WDR91_HUMAN	Oxidation (M)	M3:Oxidation (M):1000.00	67.8	0.2	1
KTM(+15.99)LLIAHY	34.87	1104.6	9	2.2	553.308	37.24	10600000	7760000	Q9UG01|IF172_HUMAN	Oxidation (M)	M3:Oxidation (M):1000.00	154.2	0.4	1
KTM(+15.99)TDTYLL	21.67	1100.54	9	1.1	551.279	42.9	20500000	25100000	P32248|CCR7_HUMAN	Oxidation (M)	M3:Oxidation (M):1000.00	182.2	0.5	1
KTNLRRTTY	12.4	1151.64	9	0	384.888	16.83	1240000	1730000	P17844|DDX5_HUMAN			929.2	1.3	1
KTNQLQRII	18.84	1112.67	9	-0.8	557.34	33	1370000	343000	Q86U44|MTA70_HUMAN			1407	1.7	1
KTNTVLKVL	23.89	1014.64	9	-1.3	508.329	33.59	5730000	2610000	Q92673|SORL_HUMAN			527.9	0.9	1
KTQDVEYIF	14.09	1141.57	9	-3.6	571.788	53.71	1740000	1990000	Q9UJ83|HACL1_HUMAN			110.6	0.3	1
KTRDYLIKI	17.74	1148.69	9	0.6	383.905	35.53	24200000	37600000	P49792|RBP2_HUMAN:O14715|RGPD8_HUMAN:Q99666|RGPD5_HUMAN:P0DJD0|RGPD1_HUMAN:P0DJD1|RGPD2_HUMAN			3119.3	3	0
KTREAVATL	12.19	987.571	9	-0.2	494.793	21.68	339000	980000	Q8WVM7|STAG1_HUMAN			283.7	0.6	1
KTREVQERL	27	1157.65	9	-0.6	386.891	18.96	4740000	5250000	Q02224|CENPE_HUMAN			244.1	0.6	1
KTREYKTSF	12.65	1158.6	9	0.7	387.209	20.34	95100		Q02978|M2OM_HUMAN			80.3	0.25	1
KTRIIDVVY	30.75	1105.65	9	2.3	553.833	41.18	3640000000	4800000000	P62241|RS8_HUMAN			124	0.4	1
KTRIPPRTY	34.76	1130.66	9	1	377.893	18.41	6400000	8360000	Q9BWU0|NADAP_HUMAN			125.8	0.4	1
KTRLVREGF	34.3	1104.64	9	0.1	369.221	22.52	20900000	24500000	Q9Y2P5|S27A5_HUMAN			198.1	0.5	1
KTRPLIPEM	23.94	1083.61	9	-1.4	542.812	37.9	2810000	5730000	O94953|KDM4B_HUMAN			164.7	0.4	1
KTRPLIPEM(+15.99)	33.82	1099.61	9	-1.6	550.809	27.43	47400000	49600000	O94953|KDM4B_HUMAN	Oxidation (M)	M9:Oxidation (M):1000.00	827.6	1.2	1
KTRQIISTI	30.01	1058.64	9	-1.1	530.329	30.35	88700000	107000000	P37268|FDFT_HUMAN			697.9	1.1	1
KTRQSAYAL	19.09	1036.57	9	-0.6	519.29	22.66	3730000	4930000	Q9BYX4|IFIH1_HUMAN			644.9	1	1
KTRSEIAQL	13.13	1044.59	9	-1.3	523.303	25.16	504000	1370000	Q86SQ7|SDCG8_HUMAN			213.1	0.5	1
KTRTNVPTF	38.66	1062.58	9	1.1	532.299	28.44	579000000	648000000	Q96BU1|S1PBP_HUMAN			105.3	0.3	1
KTSGIINKF	46.52	1006.58	9	-1.3	504.297	30.57	30500000	37200000	O95243|MBD4_HUMAN			39.3	0.125	1
KTSKIELKF	11.78	1092.65	9	0.5	365.226	32.01	584000		Q9UPR0|PLCL2_HUMAN			31.8	0.1	1
KTSNIRANF	25.16	1049.56	9	0.8	525.789	24.01	9760000	10200000	Q14247|SRC8_HUMAN			309	0.6	1
KTSQTVATF	20.96	981.513	9	0.3	491.764	29.95	378000	242000	P52888|THOP1_HUMAN			73.5	0.25	1
KTTKLYSRF	24.07	1142.64	9	-0.8	381.889	23.09	259000	140000	O60508|PRP17_HUMAN			272.4	0.6	1
KTTNVRQTY	38.76	1109.58	9	0.9	555.799	18.09	7770000	8640000	Q6PJT7|ZC3HE_HUMAN			208.1	0.5	1
KTTREYYTF	11.15	1207.59	9	-0.7	604.801	33.61	254000		Q13137|CACO2_HUMAN			38.1	0.125	1
KTVAIHTLW	43.51	1067.61	9	1.7	534.815	44.16	3330000	27900000	Q92835|SHIP1_HUMAN			3.8	0.01	1
KTVEPLEYY	35.53	1140.57	9	-0.1	571.292	47.19	39100000	57800000	Q96B26|EXOS8_HUMAN			172	0.4	1
KTVKKNTFF	21.08	1111.64	9	-0.4	556.827	22.57	1170000	4520000	P51114|FXR1_HUMAN			183.3	0.5	1
KTVPERSSF	17.43	1049.55	9	0.4	350.858	21.27	783000	797000	Q93075|TATD2_HUMAN			58.3	0.175	1
KTVVNKDVF	33.4	1048.59	9	0.7	525.303	28.23	2110000	2240000	P61353|RL27_HUMAN			420.7	0.8	1
KTYINQLSM(+15.99)	10.88	1112.55	9	1.1	371.859	24.06	1350000		Q5T4S7|UBR4_HUMAN	Oxidation (M)	M9:Oxidation (M):1000.00	957.3	1.3	1
KVAEVTKKF	51.57	1048.63	9	0.6	350.55	19.28	25300000	29000000	P35914|HMGCL_HUMAN			857.9	1.2	1
KVANIILSY	14.67	1019.6	9	-1.6	510.807	53.57	273000	0	Q96JI7|SPTCS_HUMAN			1669.3	1.9	1
KVIEINPYL	33.04	1087.63	9	0.1	544.821	56.27	7660000	7340000	P28062|PSB8_HUMAN:P28074|PSB5_HUMAN			3811	3.5	0
KVINAAHSF	52.54	985.534	9	-1.4	493.774	25.32	1720000	2070000	P49915|GUAA_HUMAN			227.8	0.5	1
KVKEKVQKL	19.57	1098.71	9	1.4	367.245	15.39	601000		Q16181|SEPT7_HUMAN			13582.3	13	0
KVKGYDNLF	36.03	1082.58	9	1.8	542.296	40.11	9070000	11100000	O43681|ASNA_HUMAN			2576.5	3	0
KVKKPKPEF	29.87	1099.68	9	-0.3	367.566	17.04	2740000	1110000	Q96KC8|DNJC1_HUMAN			6560.5	5.5	0
KVKNSQSFF	26.34	1083.57	9	-1.9	542.792	28.53	10700000	14900000	P54920|SNAA_HUMAN			3684.8	3.5	0
KVKPNLQTF	46.82	1073.62	9	1	537.819	30.01	22600000	24400000	Q96EY7|PTCD3_HUMAN			594	1	1
KVLELQRKL	36.05	1125.72	9	0.7	376.249	27.64	27700000	31700000	Q15075|EEA1_HUMAN			1512.4	1.7	1
KVLIDIREY	31.89	1147.66	9	-0.4	383.56	48	29300000	38200000	P53999|TCP4_HUMAN			1621.1	1.8	1
KVLPNDPVF	30.05	1027.57	9	0.2	514.793	50.29	817000	3240000	P51946|CCNH_HUMAN			496.3	0.9	1
KVM(+15.99)PQNHSF	35.96	1102.52	9	0.5	552.269	20.39	4850000	4050000	Q9H8K7|CJ088_HUMAN	Oxidation (M)	M3:Oxidation (M):1000.00	994.3	1.3	1
KVMPQNHSF	12.16	1086.53	9	2	544.272	22.56	344000	714000	Q9H8K7|CJ088_HUMAN			115.2	0.3	1
KVNAM(+15.99)TFTF	18.41	1073.52	9	0	537.768	50.02	1110000	827000	Q5JPE7|NOMO2_HUMAN:Q15155|NOMO1_HUMAN:P69849|NOMO3_HUMAN	Oxidation (M)	M5:Oxidation (M):1000.00	2265	2.5	0
KVRDQQLVY	19.91	1147.63	9	-0.3	383.552	26.71	20100000	24200000	Q9UJX6|ANC2_HUMAN			5092.7	4.5	0
KVREEIAEY	19.23	1135.59	9	-0.5	568.801	28.11	203000	347000	P49454|CENPF_HUMAN			2981.4	3	0
KVREIIQKL	14.54	1125.72	9	0.2	376.248	29.27	3390000	6150000	P13797|PLST_HUMAN			3155.3	3	0
KVRELELVY	31.5	1147.66	9	0.2	574.837	44.12	373000000	502000000	Q14764|MVP_HUMAN			1609.5	1.8	1
KVRTEKETI	17.39	1102.63	9	0.5	552.325	17.38	10800000	4400000	P12270|TPR_HUMAN			9628	8.5	0
KVTTVKKFF	59.05	1096.66	9	-0.5	549.339	29.51	21700000	25300000	Q9UJ41|RABX5_HUMAN			1417.6	1.7	1
KVVDVVRNL	28.88	1040.63	9	0.2	521.324	38.71	9720000	12300000	P20591|MX1_HUMAN			16094.7	16	0
KVYGKTSHL	13.04	1031.58	9	0.6	344.866	18.81	41000000		P08047|SP1_HUMAN:Q02447|SP3_HUMAN:Q02446|SP4_HUMAN:Q6BEB4|SP5_HUMAN:P0CG40|SP9_HUMAN:Q8IXZ3|SP8_HUMAN			10590.3	9	0
KWMKTSLQW	11.88	1206.62	9	4.3	604.321	51.71	1190000		Q6ZQQ2|S31D1_HUMAN			336.1	0.7	1
L(+42.01)KAGWSREE	10.86	1116.56	9	3.4	559.287	32.62	3600000		Q9H497|TOR3A_HUMAN	Acetylation (N-term)	L1:Acetylation (N-term):1000.00	1221.8	1.5	1
LAAVRGEQW	33.6	1028.54	9	0	515.277	38.92	1120000	43300000	P13498|CY24A_HUMAN			25.3	0.07	1
LAKTGVHHY	36.31	1024.55	9	0.6	513.28	17.11	5520000	5460000	P62888|RL30_HUMAN			3013.3	3	0
LAQYPVFPW	13.26	1119.58	9	1.2	560.796	47.41	52600		Q6ZS30|NBEL1_HUMAN			82	0.25	1
LARRTNSTF	27.08	1064.57	9	1.1	355.865	20.42	59200000	53200000	Q07020|RL18_HUMAN			193.8	0.5	1
LATTILQHW	42.23	1081.59	9	1.2	541.804	59.82	4990000	42300000	P78527|PRKDC_HUMAN			21.2	0.05	1
LGRPDAEYW	24.1	1105.52	9	-0.4	553.767	49	2210000	31000000	P13760|2B14_HUMAN:Q30167|2B1A_HUMAN:P13762|DRB4_HUMAN:Q30154|DRB5_HUMAN:P01911|2B1F_HUMAN:Q5Y7A7|2B1D_HUMAN:P01912|2B13_HUMAN:Q29974|2B1G_HUMAN:P04229|2B11_HUMAN			51.5	0.15	1
LSAKVRKQL	23.13	1041.67	9	0.2	348.229	19.8	2320000	1130000	Q8N884|CGAS_HUMAN			592.5	1	1
LSAPIHTQM(+15.99)	19.11	1012.5	9	2.6	507.259	30.74	790000		Q8NG31|KNL1_HUMAN	Oxidation (M)	M9:Oxidation (M):1000.00	2745.2	3	0
LSAVGERVF	10.44	976.534	9	-0.6	489.274	41.64	389000		Q9HC52|CBX8_HUMAN:O95503|CBX6_HUMAN			436.8	0.8	1
LSGPFVQKW	41.04	1060.57	9	-0.5	531.292	55.7	3130000	42900000	P22102|PUR2_HUMAN			11.4	0.02	1
LSIHLQHKF	25.11	1121.63	9	-1	374.885	35.79	12700000	16000000	Q86XI2|CNDG2_HUMAN			39.2	0.125	1
LSKKLVVRW	23.77	1127.72	9	0.4	376.913	33.61	3280000	16500000	Q96H35|RBM18_HUMAN			13.7	0.03	1
LSKNVHSFF	40.67	1077.56	9	1.4	539.788	38.67	2720000	3230000	Q9Y2D8|ADIP_HUMAN			566	0.9	1
LSKPNPPSL	44.12	951.539	9	-2.4	476.776	37.59	8620000	10700000	Q9UKK3|PARP4_HUMAN			2730.3	3	0
LSKRNPRQI	27.21	1110.66	9	-0.4	371.228	17.38	12100000	16200000	P83731|RL24_HUMAN			2031.1	2.5	0
LSKRVLIM(+15.99)Y	16.36	1137.66	9	-1.1	569.836	36.43	5250000	10600000	Q9BTX1|NDC1_HUMAN	Oxidation (M)	M8:Oxidation (M):1000.00	667.4	1	1
LSKSDHSFF	41.46	1066.51	9	-1.3	534.261	36.46	7200000	10100000	P01909|DQA1_HUMAN:P01906|DQA2_HUMAN			1136.6	1.5	1
LSLGVVKEF	25.32	990.575	9	0.2	496.295	60.16	6280000	9710000	Q9H7X0|NAA60_HUMAN			72.4	0.25	1
LSLKVLRKL	20.26	1068.74	9	-0.6	357.253	39.82	1610000	1770000	Q9UI26|IPO11_HUMAN			178.5	0.5	1
LSNTVM(+15.99)PRF	37.38	1079.54	9	1.3	540.78	39.56	15300000	17600000	P35221|CTNA1_HUMAN	Oxidation (M)	M6:Oxidation (M):1000.00	426.8	0.8	1
LSNTVMPRF	30.15	1063.55	9	1.9	532.783	50.3	5800000	12700000	P35221|CTNA1_HUMAN			132	0.4	1
LSSPVTKSF	39.62	964.523	9	0.9	483.269	39.01	111000000	129000000	P0DOX7|IGK_HUMAN:P01834|IGKC_HUMAN			37.7	0.125	1
LSSSVIREL	25.8	1002.57	9	1.6	502.293	48.15	6300000	6730000	Q8NEJ9|NGDN_HUMAN			1468.9	1.7	1
LSTLAR(+.98)LLF	14.49	1033.62	9	1.2	517.817	41.04	1990000	2680000	Q02880|TOP2B_HUMAN	Citrullination	R6:Citrullination:1000.00	575.6	0.9	1
LSTLVRPVF	21.98	1030.62	9	0.3	516.316	57.54	2310000	2970000	O00506|STK25_HUMAN			1110	1.4	1
LTAVVQKRF	27.7	1060.64	9	0.3	354.554	29.93	6350000	6900000	P23396|RS3_HUMAN			53.7	0.175	1
LTDPNRPRF	19.31	1114.59	9	-1.4	372.536	29.78	27500000	6480000	Q969X0|RIPL2_HUMAN			3094	3	0
LTHKGVKEF	30.05	1057.59	9	1	529.804	18.75	1380000	1170000	Q8N1W2|ZN710_HUMAN			1159.3	1.5	1
LTKKSSETL	19.1	1005.57	9	0.8	503.793	18.06	942000	1210000	P09543|CN37_HUMAN			4576.4	4	0
LTM(+15.99)NHVYSF	14.65	1126.51	9	-0.5	564.263	42.4	1400000		P55160|NCKPL_HUMAN	Oxidation (M)	M3:Oxidation (M):1000.00	173.1	0.4	1
LTRPGSSYF	37.56	1026.51	9	0.9	514.264	42.06	69500000	89700000	O75937|DNJC8_HUMAN			251.1	0.6	1
LTRTELETL	16.63	1074.59	9	1.5	538.304	45.11	1700000	2870000	Q96KC8|DNJC1_HUMAN			1570.8	1.8	1
LTRVEVTEF	37.55	1092.58	9	0.8	547.298	48.31	158000000	185000000	Q01105|SET_HUMAN			293.4	0.6	1
LTVQVARVY	38.2	1047.61	9	1	524.812	46.81	10800000	15500000	P57076|CF298_HUMAN			347.2	0.7	1
LTVRNLPQY	44.84	1102.61	9	1.9	552.315	46.64	114000000	151000000	Q15233|NONO_HUMAN			230.7	0.5	1
LTYENVERW	33.85	1208.58	9	-0.5	605.298	52.98	9620000	81200000	P62491|RB11A_HUMAN:Q15907|RB11B_HUMAN			12.3	0.025	1
LVHAVQALW	27.34	1035.59	9	-1	518.8	57	5500000	56000000	P24001|IL32_HUMAN			13.1	0.025	1
LVKREDYLY	36.86	1197.64	9	0.6	599.827	33.9	32200000	39200000	O95298|NDUC2_HUMAN:E9PQ53|NDUCR_HUMAN			1747.3	1.9	1
M(+15.99)ALGIQKRF	19.77	1078.6	9	0.4	360.539	32.79	2110000	782000	O95070|YIF1A_HUMAN	Oxidation (M)	M1:Oxidation (M):1000.00	226.5	0.5	1
M(+15.99)KVLLLLST	17.23	1032.63	9	4.7	345.217	17.1	3750000	4660000	P08235|MCR_HUMAN	Oxidation (M)	M1:Oxidation (M):1000.00	19004.8	20	0
M(+15.99)SLPIAKKY	26.34	1065.59	9	0.3	356.204	30.16	5870000	16000000	Q6UWU4|CF089_HUMAN	Oxidation (M)	M1:Oxidation (M):1000.00	136.8	0.4	1
M(+15.99)SRGVNPSL	14.58	975.481	9	-1.5	488.747	27.93	1500000	1630000	P46379|BAG6_HUMAN	Oxidation (M)	M1:Oxidation (M):1000.00	5436.8	5	0
M(+15.99)THNLLLNY	14.05	1133.55	9	1.1	567.785	51.37	3560000	3250000	Q13547|HDAC1_HUMAN:Q92769|HDAC2_HUMAN	Oxidation (M)	M1:Oxidation (M):1000.00	4824.6	4.5	0
M(+15.99)TKRDVPGF	40.07	1065.53	9	-0.9	533.771	27.8	15500000	14500000	Q9BXR0|TGT_HUMAN	Oxidation (M)	M1:Oxidation (M):1000.00	2314.8	2.5	0
M(+15.99)TNPHNHLY	59.25	1141.5	9	-0.2	571.756	20.76	59200000	61800000	Q15006|EMC2_HUMAN	Oxidation (M)	M1:Oxidation (M):1000.00	1006.6	1.3	1
MSTAIREVG	10.99	962.486	9	-2.1	482.249	21.64	1030000		Q8WWZ7|ABCA5_HUMAN			908.1	1.3	1
MTIMSLLLW	19.85	1106.59	9	0.5	554.301	59.85	328000	2460000	Q9H015|S22A4_HUMAN			6.7	0.01	1
MTKRDVPGF	33.77	1049.53	9	-1.5	525.773	30.99	856000	9110000	Q9BXR0|TGT_HUMAN			308.2	0.6	1
MTNPHNHLY	41.21	1125.5	9	-0.3	563.758	24.03	12700000	24300000	Q15006|EMC2_HUMAN			60.3	0.175	1
NKTLTR(+.98)AQL	15.51	1044.59	9	1	523.304	24.95	1190000	1670000	Q6P0N0|M18BP_HUMAN	Citrullination	R6:Citrullination:1000.00	1473.1	1.7	1
NTRPQENTF	28.26	1105.52	9	-1	553.764	25.13	741000	599000	P48436|SOX9_HUMAN			593.2	1	1
PLPSR(+.98)RDVY	11.43	1102.58	9	0.4	552.296	30.07	1250000		P38159|RBMX_HUMAN	Citrullination	R5:Citrullination:40.00	10568.1	9	0
PTIQQVHKF	11.85	1096.6	9	-0.2	366.541	25.23	2820000		Q8NB42|ZN527_HUMAN			3608.7	3.5	0
QAKKVITM(+15.99)F	20.86	1080.6	9	-0.5	541.307	26.51	4600000	3650000	P13010|XRCC5_HUMAN	Oxidation (M)	M8:Oxidation (M):1000.00	549.1	0.9	1
QALQVARQF	27.88	1059.58	9	1.2	530.799	41.23	3600000	3990000	Q8IVH2|FOXP4_HUMAN			404.7	0.8	1
QARIEIESF	19.8	1091.56	9	1	546.788	50.38	10300000	17700000	P11021|BIP_HUMAN			2082.5	2.5	0
QARRLAPNF	20.97	1071.59	9	-1	358.205	28.21	6970000	8810000	Q00994|BEX3_HUMAN			4116.8	4	0
QLQQLKKKL	14.51	1125.72	9	-0.6	376.248	30.02	4680000	5520000	Q8TBY8|PMFBP_HUMAN			25884.9	36	0
QSAVM(+15.99)SATF	10.5	956.427	9	0.3	479.221	39.97	217000		Q13409|DC1I2_HUMAN	Oxidation (M)	M5:Oxidation (M):1000.00	2864.6	3	0
QSFTGSRTY	29.74	1045.48	9	1.7	523.75	28.57	3380000	3310000	Q9GZY6|NTAL_HUMAN			926.2	1.3	1
QSKKDFSKF	31.66	1113.58	9	-0.9	372.201	19.53	3600000	3430000	Q9HC24|LFG4_HUMAN			5485.5	5	0
QSKTIKVSY	34.87	1052.59	9	-0.7	527.3	25.19	3510000	4960000	Q15717|ELAV1_HUMAN			2645.6	3	0
QSLIVKKEF	28.89	1090.64	9	1.1	546.327	35.19	4540000	6560000	O75674|TM1L1_HUMAN			450.7	0.8	1
QSLQIFRKW	29.11	1204.67	9	0	603.343	51	4610000	30900000	Q5TA45|INT11_HUMAN			41.3	0.125	1
QSLRLVRKL	35.69	1111.72	9	1.7	371.581	27.57	11400000	15000000	P51451|BLK_HUMAN			792.2	1.1	1
QTATIAKTF	33.89	979.534	9	-1.1	490.774	33.59	568000	433000	Q96BD5|PF21A_HUMAN			356.3	0.7	1
QTFRLYREY	42.99	1274.64	9	-1.3	425.887	41.82	10100000	12600000	Q12789|TF3C1_HUMAN			636.5	1	1
QTISLTRPF	11.95	1061.59	9	-0.4	531.801	53.88	564000	0	Q96F86|EDC3_HUMAN			1563.7	1.8	1
QTLHLM(+15.99)RQL	11.28	1154.62	9	2.4	385.882	31.93	3650000		O14730|RIOK3_HUMAN	Oxidation (M)	M6:Oxidation (M):1000.00	3303	3.5	0
QTRSPGETF	31.38	1021.48	9	1.9	511.75	25.35	7580000	8490000	Q8WVR3|CG043_HUMAN			1585.8	1.8	1
QTSKTQRLL	33.21	1073.62	9	-0.7	358.88	20.28	9990000	12300000	Q96P48|ARAP1_HUMAN			1616	1.8	1
QTVHINENF	14.09	1100.53	9	0.6	551.27	40.2	2000000	2180000	Q13573|SNW1_HUMAN			4326.9	4	0
QTVSPAEKW	45.96	1044.52	9	-0.4	523.269	34.45	2190000	156000000	Q16658|FSCN1_HUMAN			56	0.175	1
R(+.98)LLEEANKY	11.77	1135.59	9	0.2	379.536	27.79	204000		Q15643|TRIPB_HUMAN	Citrullination	R1:Citrullination:1000.00	5680.8	5	0
R(+42.01)(+.98)SIVRTTSM	10.72	1092.56	9	0.8	547.288	33.67	263000		Q86VP3|PACS2_HUMAN	Acetylation (N-term); Citrullination	R1:Acetylation (N-term):1000.00;R1:Citrullination:6.65	18510.6	19	0
RAAPFSLEY	22.88	1052.53	9	-0.8	527.271	53.33	17000000	25300000	Q15181|IPYR_HUMAN			159.4	0.4	1
RAFHPDLEF	16.55	1130.55	9	1.2	566.283	48.56	3020000	1600000	O95864|FADS2_HUMAN			87.8	0.25	1
RAHPAYHSF	44.23	1084.52	9	0.5	362.514	19.1	5250000	6520000	Q14746|COG2_HUMAN			39.3	0.125	1
RAHRGLRHF	18.9	1148.64	9	0.3	383.888	15.83	2650000	4270000	P62269|RS18_HUMAN			203.8	0.5	1
RAIQINPAF	16.97	1028.58	9	-0.9	515.295	47.94	944000	2050000	O15294|OGT1_HUMAN			515	0.9	1
RAKAIIVEF	18.29	1045.63	9	0.8	523.822	41.86	85500000	119000000	O60841|IF2P_HUMAN			107.8	0.3	1
RAKPEYHKF	53.49	1174.62	9	0.7	392.549	17.93	47900000	62900000	Q00341|VIGLN_HUMAN			95.5	0.3	1
RALDIERKL	30.25	1112.67	9	0.9	371.897	29.57	11300000	8370000	Q96EA4|SPDLY_HUMAN			437	0.8	1
RALDKRHLL	12.03	1120.68	9	1.7	374.569	21.07	585000	541000	Q92624|APBP2_HUMAN			875.9	1.2	1
RALELIRSM(+15.99)	10.31	1103.61	9	-1.5	368.877	33.18	797000		Q9BQ75|CMS1_HUMAN	Oxidation (M)	M9:Oxidation (M):1000.00	1298.4	1.6	1
RALKEIRKF	41.54	1159.72	9	-0.7	387.58	20.28	15400000	19700000	P62899|RL31_HUMAN			39.8	0.125	1
RALKEITTF	15.68	1077.62	9	0	539.816	36.23	3920000	5080000	Q9NW13|RBM28_HUMAN			24.2	0.07	1
RALRLVRRL	15.74	1151.77	9	0.5	288.951	23.51	20900000	25300000	Q8N8D1|PDCD7_HUMAN			95.8	0.3	1
RANVNARTF	41.78	1047.56	9	2.2	524.787	21.49	18700000	23600000	Q00653|NFKB2_HUMAN			182.8	0.5	1
RARELLVSY	22.44	1105.62	9	-0.9	369.548	37.42	81100000	98300000	Q9Y4W2|LAS1L_HUMAN			138.6	0.4	1
RAREYNARL	37.5	1147.62	9	0.7	383.548	19.71	139000000	166000000	Q00653|NFKB2_HUMAN			1037.5	1.4	1
RARPATDSF	26.23	1019.51	9	-0.4	340.845	21.41	29500000	38800000	P23588|IF4B_HUMAN			144.1	0.4	1
RARPKELRF	34.12	1171.69	9	1.7	391.572	20.47	10600000	14600000	Q53GA4|PHLA2_HUMAN			62.5	0.2	1
RARTIYERF	38.56	1210.66	9	1.1	404.56	27.18	29700000	33000000	Q9BZJ0|CRNL1_HUMAN			166	0.4	1
RAYAKDVKF	22.88	1096.6	9	-0.4	366.541	23.49	7930000	289000	P10809|CH60_HUMAN			82.9	0.25	1
RAYLAQRKF	45.07	1151.66	9	0.2	384.893	22.71	12500000	16100000	O14579|COPE_HUMAN			41.9	0.125	1
RGRPPIATF	10.73	1013.58	9	0.9	338.867	32.19	155000		Q96L91|EP400_HUMAN			337.6	0.7	1
RIINERHLF	18	1196.68	9	-0.4	399.9	32.72	1590000	2150000	Q7Z3E1|PARPT_HUMAN			987.8	1.3	1
RIKAINTFF	21.67	1108.64	9	-0.7	555.327	48.63	7050000	21200000	Q71RC2|LARP4_HUMAN			2110.6	2.5	0
RIREHELLY	12.56	1227.67	9	1.5	410.232	28.59	2140000	2990000	Q5TF21|SOGA3_HUMAN			4647.7	4.5	0
RLSFHSAVV	11.86	1014.56	9	-1.1	339.194	33.26	8900000		Q8WWY8|LIPH_HUMAN			15435.5	15	0
RM(+15.99)FAPTKTW	25.94	1152.58	9	0	385.199	32.38	5230000	107000000	P36578|RL4_HUMAN	Oxidation (M)	M2:Oxidation (M):1000.00	22.1	0.06	1
RQGLTVLTW	19.67	1072.6	9	0.4	537.309	53.48	2630000	10800000	Q96JB1|DYH8_HUMAN			1343.4	1.6	1
RSAEKLALF	18.22	1033.59	9	1.3	517.804	40.91	1650000	2670000	Q9NUD5|ZCHC3_HUMAN			92.9	0.3	1
RSAPVYKRI	16	1088.65	9	-0.2	363.889	19.87	397000	290000	Q9Y2L1|RRP44_HUMAN			274.2	0.6	1
RSAQAIHKF	27.73	1056.58	9	-2.8	353.2	19.03	1140000	1500000	Q9Y4B6|DCAF1_HUMAN			34.4	0.1	1
RSARPPEKF	15.19	1086.59	9	0.7	363.205	18.26	1530000	2170000	Q96GN5|CDA7L_HUMAN			90.5	0.25	1
RSAVFSVTY	17.41	1028.53	9	-0.6	515.271	48.12	2180000	5150000	Q8NF50|DOCK8_HUMAN			67.9	0.2	1
RSDPGHYSF	44.35	1064.47	9	-0.7	533.241	29.22	81000000	98400000	P28062|PSB8_HUMAN			270	0.6	1
RSFHEVREF	41.29	1205.59	9	0.1	402.872	26.58	11800000	10200000	Q92963|RIT1_HUMAN			33.6	0.1	1
RSFPGFQAF	16.22	1055.52	9	-0.8	528.766	61.37	3820000	2710000	Q01780|EXOSX_HUMAN			176.9	0.5	1
RSFRVAKVF	15.21	1108.65	9	-0.5	370.557	32.38	6100000	6280000	Q6UXN9|WDR82_HUMAN			7.5	0.01	1
RSFSVPKKF	35.97	1094.62	9	-0.1	365.882	29.94	2300000		Q5TBA9|FRY_HUMAN			12.7	0.025	1
RSGPFGQIF	26.92	1007.52	9	1.3	504.767	59.28	25600000	46800000	P07437|TBB5_HUMAN:P04350|TBB4A_HUMAN:P68371|TBB4B_HUMAN:Q9BVA1|TBB2B_HUMAN:Q13885|TBB2A_HUMAN			68.1	0.2	1
RSGPFGQLF	26.92	1007.52	9	1.3	504.767	59.28	25600000	46800000	Q9BUF5|TBB6_HUMAN			37.2	0.125	1
RSHDTLVRW	38.35	1168.61	9	-0.7	390.544	28.57	476000	22400000	Q9NU22|MDN1_HUMAN			15	0.03	1
RSHGFAAEF	33.51	1020.48	9	-1	511.246	32.7	5510000	2460000	P55265|DSRAD_HUMAN			63.9	0.2	1
RSHPYKHSF	40.86	1157.57	9	0	386.865	17.05	16800000	16900000	P0DPB5|RPC22_HUMAN			24.8	0.07	1
RSHYLM(+15.99)HNY	10.4	1235.55	9	-3.3	412.856	19.37	168000		Q86TG7|PEG10_HUMAN	Oxidation (M)	M6:Oxidation (M):1000.00	349	0.7	1
RSIEKRDTL	32.11	1116.63	9	0	373.216	17.76	3950000	6340000	Q9H6F5|CCD86_HUMAN			3832.6	3.5	0
RSIGALNKI	11.34	970.592	9	-1.6	324.538	31.07	275000		Q9H2S1|KCNN2_HUMAN:Q92952|KCNN1_HUMAN:Q9UGI6|KCNN3_HUMAN			399.3	0.7	1
RSKADVERY	38.53	1122.58	9	-0.7	375.2	17.04	1540000	2280000	P49792|RBP2_HUMAN:O14715|RGPD8_HUMAN:Q99666|RGPD5_HUMAN			249.3	0.6	1
RSKDITSLF	12.22	1065.58	9	0.8	533.799	46.52	4160000		Q99570|PI3R4_HUMAN			310.4	0.6	1
RSKEDGRLY	49.93	1122.58	9	-0.1	375.2	17.74	16600000	18100000	Q99640|PMYT1_HUMAN			276.9	0.6	1
RSKESEVFY	20.82	1143.56	9	0.1	382.193	28.56	6910000	9200000	Q16665|HIF1A_HUMAN			560.8	0.9	1
RSKESLVSF	11.75	1051.57	9	2.7	351.53	34.44	1020000	6200000	Q8IXB1|DJC10_HUMAN			150.7	0.4	1
RSKESVPEF	28.23	1077.55	9	0.5	539.78	29.8	74600000	81500000	P16949|STMN1_HUMAN			889	1.2	1
RSKKLLPNF	18.73	1101.67	9	-0.2	368.229	30.42	3080000	1610000	Q01432|AMPD3_HUMAN			581.6	0.9	1
RSKKLSVLI	33.72	1042.69	9	-0.7	348.569	27.84	11400000	13200000	Q9NTJ3|SMC4_HUMAN			697	1.1	1
RSKLIEPFF	13.95	1135.64	9	3.3	568.829	54.71	4030000	3340000	O95453|PARN_HUMAN			199.8	0.5	1
RSKLNPQQF	25.54	1116.6	9	0.3	559.309	25.36	9690000	10600000	P46977|STT3A_HUMAN			240.6	0.6	1
RSKPLFHHF	46.81	1167.63	9	0.6	390.218	21.67	47000000	54200000	Q03113|GNA12_HUMAN			62.5	0.2	1
RSKPQLARY	36.67	1117.64	9	1.2	373.553	19.42	5530000	5990000	O95983|MBD3_HUMAN:Q9UBB5|MBD2_HUMAN			84.4	0.25	1
RSKQAEEEF	37.14	1122.53	9	0.7	562.273	19.07	7790000	10700000	P26639|SYTC_HUMAN			351.9	0.7	1
RSKTVYEGF	33.12	1085.55	9	-0.9	543.782	30.76	65900000	77900000	Q9NW38|FANCL_HUMAN			517.1	0.9	1
RSLEISQSY	23.67	1081.54	9	-0.8	541.777	37.56	1870000	2690000	Q13315|ATM_HUMAN			41.3	0.125	1
RSLGVHLSF	10.66	1014.56	9	2	508.289	46.39	818000		Q9NP61|ARFG3_HUMAN:Q8N6H7|ARFG2_HUMAN			18.3	0.04	1
RSLLLQKKL	13.78	1097.73	9	0.4	366.917	27.18	2920000	1350000	O15514|RPB4_HUMAN			72.2	0.25	1
RSLPEHPAF	15.24	1052.54	9	0.7	527.278	34.21	985000	281000	Q0IIM8|TBC8B_HUMAN:O95759|TBCD8_HUMAN:Q6ZT07|TBCD9_HUMAN			67.8	0.2	1
RSLPQRFKM(+15.99)	45.48	1177.64	9	0	393.554	20.52	18300000	24000000	Q9Y3D0|CIA2B_HUMAN	Oxidation (M)	M9:Oxidation (M):1000.00	396.5	0.7	1
RSLRLQKQF	29.49	1174.69	9	-1.1	392.571	25.75	154000000	172000000	Q12788|TBL3_HUMAN			9.7	0.015	1
RSLSTTNVF	45.07	1023.53	9	0.3	512.775	40.79	18400000	23700000	Q16531|DDB1_HUMAN			34.4	0.1	1
RSM(+15.99)GLPLQF	14.41	1063.55	9	-2.1	532.78	56.84	1600000	2660000	Q96RS0|TGS1_HUMAN	Oxidation (M)	M3:Oxidation (M):1000.00	56.3	0.175	1
RSNRVVRTL	17.1	1099.66	9	1	367.56	18.19	1180000	1360000	Q9Y5Y5|PEX16_HUMAN			260.6	0.6	1
RSRDIRIKY	11.12	1205.7	9	-1.6	302.432	20.93	458000		O14511|NRG2_HUMAN			443.3	0.8	1
RSRKELLNF	12.04	1161.66	9	-2.1	388.227	31.7	48300000	62400000	Q9Y3A4|RRP7A_HUMAN			211.9	0.5	1
RSRPHTRLF	39.71	1168.66	9	-0.9	293.171	19.62	29700000	34900000	Q9UKK3|PARP4_HUMAN			35.6	0.1	1
RSRQEPSRF	33.94	1161.6	9	0.7	388.208	16.52	3520000	5360000	O14647|CHD2_HUMAN			196	0.5	1
RSRRDELHY	16.24	1230.62	9	-0.1	411.214	18.15	8210000	9400000	Q9Y5W7|SNX14_HUMAN			68.9	0.2	1
RSRSFDYNY	29.21	1206.54	9	0.9	403.188	30.9	28600000	32400000	O75494|SRS10_HUMAN			121.8	0.4	1
RSRTIVHTL	30.84	1081.64	9	0.4	361.553	20.11	116000000	168000000	Q9NWU5|RM22_HUMAN			74.7	0.25	1
RSSGVRRSF	18.53	1050.57	9	2.3	351.197	16.59	1260000	1480000	Q14667|K0100_HUMAN			64.2	0.2	1
RSSKFRHVF	26.76	1162.64	9	-0.5	388.552	20.42	5040000	5190000	P31146|COR1A_HUMAN:Q92828|COR2A_HUMAN			30.4	0.09	1
RSSNVSYKY	20.51	1102.54	9	0	552.278	20.82	472000	208000	P11717|MPRI_HUMAN			41.2	0.125	1
RSSSLIRHY	32.02	1117.6	9	0.6	373.541	20.13	1920000	1760000	O75123|ZN623_HUMAN			118.1	0.3	1
RSTLVEHVY	18.61	1102.58	9	0.3	552.296	30.07	2820000	4380000	Q96H86|ZN764_HUMAN			83.4	0.25	1
RSVLHHFHF	43.1	1178.61	9	2.4	393.878	29.89	30400000	40500000	Q15269|PWP2_HUMAN			104.7	0.3	1
RSVQKYHVF	26.76	1162.62	9	0.9	388.549	24.7	482000	960000	Q8IY21|DDX60_HUMAN			280.4	0.6	1
RTAHVILRY	22.99	1127.66	9	-0.9	376.892	25.92	16200000	19000000	Q9UKV5|AMFR_HUMAN			83.7	0.25	1
RTAQEVETY	35.82	1095.52	9	0.3	548.767	26.67	50800000	59000000	P17844|DDX5_HUMAN			477.2	0.8	1
RTAQKTALL	26.42	1000.6	9	0.7	501.309	22.14	3090000	4130000	Q9BVM2|DPCD_HUMAN			1491.4	1.7	1
RTATFQQRF	39.13	1153.6	9	2	385.541	28.87	24300000	25700000	Q9BY77|PDIP3_HUMAN			38.2	0.125	1
RTDGKVFQF	25.37	1096.57	9	0.6	549.291	39.4	6690000	8830000	P83731|RL24_HUMAN			1250.6	1.5	1
RTFGHLLRY	33.32	1161.64	9	-0.8	388.221	34.69	9020000	17000000	Q13200|PSMD2_HUMAN			51.1	0.15	1
RTFKRLYQY	25.51	1273.69	9	0	425.572	28.03	12000000	16900000	Q12789|TF3C1_HUMAN			13.9	0.03	1
RTHKDSFTY	26.74	1153.55	9	-0.5	385.524	19.59	3810000	2980000	O75362|ZN217_HUMAN			86	0.25	1
RTHPVATSF	41.03	1014.52	9	-1.5	508.269	23.79	5520000	8130000	Q96B26|EXOS8_HUMAN			16.1	0.04	1
RTHPVEIFY	13.04	1160.6	9	0.4	581.306	39.63	566000	1020000	O43143|DHX15_HUMAN			94.8	0.3	1
RTHQIRVHL	36.84	1158.67	9	0.7	290.676	20.97	7300000	9210000	Q8IZ73|RUSD2_HUMAN			1213.8	1.5	1
RTHTGEKPF	15.33	1071.55	9	1.1	358.19	16.94	302000		Q13118|KLF10_HUMAN:Q8N393|ZN786_HUMAN:Q9Y2H8|ZN510_HUMAN:Q6NX45|ZN774_HUMAN:Q9UJQ4|SALL4_HUMAN:Q9BXA9|SALL3_HUMAN:P17025|ZN182_HUMAN:P10074|TZAP_HUMAN:Q14872|MTF1_HUMAN:A6NFI3|ZN316_HUMAN:Q9NSC2|SALL1_HUMAN:O14901|KLF11_HUMAN:Q96T25|ZIC5_HUMAN:Q96MR9|ZN560_HUMAN:O95409|ZIC2_HUMAN:O60481|ZIC3_HUMAN:Q2M3X9|ZN674_HUMAN:P17020|ZNF16_HUMAN:P17097|ZNF7_HUMAN:Q15915|ZIC1_HUMAN:Q8N184|ZN567_HUMAN:O94892|…			392.2	0.7	1
RTHTGERPF	23.73	1099.55	9	0	367.525	17.88	289000	184000	Q9Y2Y9|KLF13_HUMAN:Q6NX45|ZN774_HUMAN:Q9UJQ4|SALL4_HUMAN:Q9BXA9|SALL3_HUMAN:P17025|ZN182_HUMAN:P10074|TZAP_HUMAN:Q14872|MTF1_HUMAN:A6NFI3|ZN316_HUMAN:Q9NSC2|SALL1_HUMAN:P52747|ZN143_HUMAN:Q9BWM5|ZN416_HUMAN:P36508|ZNF76_HUMAN:Q9BXK1|KLF16_HUMAN:Q7L3S4|ZN771_HUMAN:Q8TD94|KLF14_HUMAN:Q6ZN11|ZN793_HUMAN:Q6ZNH5|ZN497_HUMAN:Q9BR84|ZN559_HUMAN:Q8TF50|ZN526_HUMAN:Q9ULD5|ZN777_HUMAN:Q6ZN55|ZN574_HUMAN			516	0.9	1
RTINVYPNF	25.54	1122.58	9	-0.5	562.298	51.83	59300000	81200000	O95168|NDUB4_HUMAN			767.9	1.1	1
RTIQAHEGF	40.14	1057.53	9	0.3	529.773	24.7	4190000	6190000	Q9NV06|DCA13_HUMAN			185.8	0.5	1
RTIVIRRDY	35.39	1190.69	9	-0.8	397.903	24.29	368000000	511000000	P62280|RS11_HUMAN			202	0.5	1
RTKASVHTL	51.97	1011.58	9	0	338.201	17.21	36600000	36600000	O43660|PLRG1_HUMAN			210.3	0.5	1
RTKDILIRF	27.77	1160.7	9	0.1	387.908	38.81	73500000	101000000	Q68CP4|HGNAT_HUMAN			334	0.7	1
RTKGQLANF	15.13	1033.57	9	1.3	517.791	25.09	1670000	4610000	Q01433|AMPD2_HUMAN			905.2	1.2	1
RTKPFHRKF	23.37	1215.7	9	-0.7	406.24	16.81	376000	716000	Q9Y5S2|MRCKB_HUMAN			28	0.08	1
RTKQPIAYF	12.78	1122.62	9	-1.1	562.316	36.53	1180000	1390000	Q5K651|SAMD9_HUMAN			96.6	0.3	1
RTKRPVAVY	17.3	1088.65	9	0.6	363.889	18.16	5510000	6970000	A1A4S6|RHG10_HUMAN			151.5	0.4	1
RTKRSSVVF	17.1	1078.62	9	-0.2	360.549	20.14	65600000	77100000	Q92608|DOCK2_HUMAN			109	0.3	1
RTKTKPHLF	44.57	1126.66	9	-0.4	376.561	17.91	33300000	39500000	Q9H307|PININ_HUMAN			110.4	0.3	1
RTLGEIPTY	13.48	1048.56	9	-0.3	525.285	46.32	2910000	818000	O43290|SNUT1_HUMAN			74.9	0.25	1
RTLGM(+15.99)QVRY	11.26	1138.59	9	-3.3	380.537	26.45	645000		Q9BV23|ABHD6_HUMAN	Oxidation (M)	M5:Oxidation (M):1000.00	199.6	0.5	1
RTLKEILRY	17	1190.71	9	1.1	397.912	38.3	1310000	1770000	Q9UH17|ABC3B_HUMAN			45.3	0.15	1
RTLPNNKHY	24.45	1141.6	9	-0.4	381.54	17.03	830000	538000	Q9UPU7|TBD2B_HUMAN			38.8	0.125	1
RTLPVLLLY	11.6	1086.68	9	-0.1	544.347	71.58	178000	790000	Q9NR09|BIRC6_HUMAN			14.2	0.03	1
RTLVNVVKY	11.75	1090.65	9	0.1	546.332	36.08	716000		P29083|T2EA_HUMAN			55	0.175	1
RTM(+15.99)PIYPTY	26.13	1156.56	9	0.8	579.287	39.84	38000000	43000000	Q9P2E3|ZNFX1_HUMAN	Oxidation (M)	M3:Oxidation (M):1000.00	130.9	0.4	1
RTM(+15.99)QEIERY	22.14	1240.59	9	0.7	414.537	22.46	2290000	929000	Q15047|SETB1_HUMAN	Oxidation (M)	M3:Oxidation (M):1000.00	152.8	0.4	1
RTNAIKQTF	17.41	1077.59	9	-0.1	539.804	23.4	4910000	5310000	Q676U5|A16L1_HUMAN			47.5	0.15	1
RTQIRHM(+15.99)KF	32.94	1231.66	9	1	411.561	17.57	71500000	86300000	O95503|CBX6_HUMAN	Oxidation (M)	M7:Oxidation (M):1000.00	145.3	0.4	1
RTQIRHMKF	38.34	1215.67	9	-0.9	406.229	19.4	17800000	36900000	O95503|CBX6_HUMAN			159.7	0.4	1
RTREGNDLY	12.22	1122.54	9	-2.8	375.187	20.32	751000		P06576|ATPB_HUMAN			1366.3	1.6	1
RTRHLPLQF	29.62	1166.67	9	1.8	389.897	34.06	43100000	56300000	P09884|DPOLA_HUMAN			42.2	0.125	1
RTRIAAQGF	15.48	1018.57	9	0.4	340.53	25.82	571000	1210000	Q9BW72|HIG2A_HUMAN			114.2	0.3	1
RTRKQKYFY	13.34	1288.7	9	0.2	430.575	19.41	856000	1090000	P49761|CLK3_HUMAN			92.1	0.3	1
RTSIVEKRF	44.46	1134.65	9	-0.8	379.224	23.04	12400000	28400000	Q9BXR0|TGT_HUMAN			28.4	0.08	1
RTTNLIRHF	48.18	1156.65	9	0	386.556	26.43	97800000	112000000	Q14592|ZN460_HUMAN			107.3	0.3	1
RTTQIYTYF	18.56	1191.59	9	-0.6	596.803	53.99	437000	815000	Q9UGP8|SEC63_HUMAN			151.8	0.4	1
RTVEKPPKF	49.8	1100.63	9	1.7	367.886	22.04	153000000	183000000	Q01082|SPTB2_HUMAN:O15020|SPTN2_HUMAN:P11277|SPTB1_HUMAN			472.6	0.8	1
RTVIIEQSW	39.5	1130.61	9	0.1	566.312	49.56	66700000	139000000	P10809|CH60_HUMAN			5.2	0.01	1
RTVRIWRQY	26.72	1276.72	9	0.5	426.579	29.6	5850000	30500000	O76071|CIAO1_HUMAN			33.6	0.1	1
RTYGVVAQY	12.45	1055.54	9	-2.1	528.776	38.17	98200		A2RUS2|DEND3_HUMAN			30.3	0.09	1
RTYVDPHTY	10.83	1150.54	9	1.5	576.278	28.06	348000		P29320|EPHA3_HUMAN			33.2	0.1	1
RVAHFGYHW	35.42	1171.57	9	-0.3	391.53	34.01	650000	7240000	O15239|NDUA1_HUMAN			11.9	0.02	1
RVAQM(+15.99)KRTW	29.04	1190.63	9	-0.7	397.885	17.01	175000	15100000	Q8IY37|DHX37_HUMAN	Oxidation (M)	M5:Oxidation (M):1000.00	70.2	0.2	1
RVHPETYEW	37.54	1215.57	9	0.2	608.791	35.04	302000	21500000	Q7KZ85|SPT6H_HUMAN			13.1	0.025	1
RVIDVGSEW	26.32	1059.53	9	0.6	530.775	50.71	1840000	20700000	Q00403|TF2B_HUMAN			148.6	0.4	1
RVKEIYNTY	16.14	1184.62	9	1.3	593.317	27.82	503000	2820000	Q99502|EYA1_HUMAN			4234.3	4	0
RVKPNIFSY	25.24	1122.62	9	0.2	562.317	40.36	7210000	10200000	Q96PZ0|PUS7_HUMAN			724.7	1.1	1
RVKTVTFEY	22.05	1141.61	9	-0.9	571.813	36.85	7640000	11600000	O75891|AL1L1_HUMAN			3830.2	3.5	0
RVM(+15.99)M(+15.99)VAKKF	27.63	1140.61	9	-0.1	381.212	18.89	2890000	2750000	P30101|PDIA3_HUMAN	Oxidation (M)	M3:Oxidation (M):1000.00;M4:Oxidation (M):1000.00	6954.5	6	0
RVM(+15.99)MVAKKF	36.19	1124.62	9	0.5	375.881	22.3	395000		P30101|PDIA3_HUMAN	Oxidation (M)	M3:Oxidation (M):14.02	1185.7	1.5	1
RVMM(+15.99)VAKKF	23.36	1124.62	9	-1.1	375.88	21.17	395000	362000	P30101|PDIA3_HUMAN	Oxidation (M)	M4:Oxidation (M):17.01	2019.1	2.5	0
RVRDINEAF	21.62	1118.58	9	2.3	373.869	32.09	53400000	64700000	Q99081|HTF4_HUMAN:P15923|TFE2_HUMAN:P15884|ITF2_HUMAN			6025.6	5.5	0
RVRDVVTKY	29.89	1134.65	9	1.5	379.225	22.28	35000000	40700000	Q12931|TRAP1_HUMAN			3209.7	3	0
SAANIQPIF	18.83	959.508	9	0	480.761	61.97	1180000	1970000	P26010|ITB7_HUMAN			1409.8	1.7	1
SAAYLPRM(+15.99)W	25.36	1109.53	9	0.9	555.774	50.24	1700000	18100000	Q9UKK3|PARP4_HUMAN	Oxidation (M)	M8:Oxidation (M):1000.00	32.9	0.1	1
SAHGIVVAW	29.53	938.497	9	0.7	470.256	52.04	298000	3200000	Q9Y4W2|LAS1L_HUMAN			135.5	0.4	1
SAIIIQRKW	26.43	1113.67	9	-1.6	557.839	40.26	609000	8130000	Q8IZT6|ASPM_HUMAN			14.8	0.03	1
SAIKENFQF	22.24	1082.54	9	0.1	542.277	50.97	843000	1080000	Q460N5|PAR14_HUMAN			305.7	0.6	1
SALIIQKHW	35.67	1094.62	9	0.6	548.319	41.6	2810000	15200000	Q15051|IQCB1_HUMAN			9.4	0.015	1
SAPDKSLEL	12.13	958.497	9	-1.3	480.255	37.18	156000		Q969F1|TF3C6_HUMAN			26444.9	38	0
SAPSRATAL	16.25	872.472	9	-0.8	437.243	23.75	7300000	8610000	Q6PI47|KCD18_HUMAN			20529.6	23	0
SAPYGRITL	14.93	976.534	9	-1.4	489.274	47.47	3180000	3100000	Q7L576|CYFP1_HUMAN:Q96F07|CYFP2_HUMAN			21731.7	26	0
SAREDVATW	22.03	1033.48	9	0.2	517.749	36.98	108000	21000000	P78316|NOP14_HUMAN			27.5	0.08	1
SAVNIIRTF	40.93	1019.58	9	-0.3	510.795	53.91	10500000	14000000	P29728|OAS2_HUMAN			396.1	0.7	1
SSLPDNRAY	23.51	1021.48	9	0.4	511.749	29.96	1570000	2620000	Q69YN4|VIR_HUMAN			750.3	1.1	1
SSLQLYRQF	20.87	1140.59	9	0.4	571.304	53.24	8460000	12500000	Q76N32|CEP68_HUMAN			364.2	0.7	1
SSLRVPSQW	39.08	1058.55	9	0.2	530.283	49.56	3530000	69600000	P25774|CATS_HUMAN			8.2	0.01	1
SSPQPGSAL	12.25	842.413	9	-0.4	422.214	32.25	745000		O14497|ARI1A_HUMAN			20613.5	23	0
SSRKEQLVF	15.75	1092.59	9	-0.4	547.303	30.1	2740000	4600000	Q8N1B4|VPS52_HUMAN			368.3	0.7	1
SSRQIISHW	30.18	1112.57	9	-1.2	371.864	32.53	3240000	81100000	Q09472|EP300_HUMAN:Q92793|CBP_HUMAN			26.8	0.07	1
SSRRKQLTF	13.44	1121.63	9	0.5	374.884	20.29	34000000	25000000	Q8WTV1|THAP3_HUMAN			287.2	0.6	1
SSSSVRVEW	32.95	1035.5	9	0.3	518.757	40.68	1090000	8910000	Q9NZ45|CISD1_HUMAN			64.2	0.2	1
STASWAERF	19.52	1053.49	9	1.8	527.752	34.4	7100000	5360000	P11277|SPTB1_HUMAN			562.8	0.9	1
STDRHIRLW	38.81	1182.63	9	1.4	395.216	34.44	5600000	101000000	Q9GZL7|WDR12_HUMAN			114.2	0.3	1
STKSIHANF	25.69	1003.51	9	-1.9	502.761	23.37	142000	375000	Q8IWZ3|ANKH1_HUMAN			2877.4	3	0
STRGISQLW	22.04	1046.55	9	0.9	524.283	51.78	2870000	65200000	Q96HA1|P121A_HUMAN:A8CG34|P121C_HUMAN			10.2	0.015	1
STTDVEKSF	53.51	1012.47	9	1.2	507.244	32.87	51700000	21100000	Q53EL6|PDCD4_HUMAN			1680.3	1.9	1
SVM(+15.99)KHRFLF	19.71	1179.62	9	2	394.216	32.25	3460000	1990000	P17174|AATC_HUMAN	Oxidation (M)	M3:Oxidation (M):1000.00	3370.4	3.5	0
SVMSKLASF	11.77	968.5	9	1	485.258	39.11	1270000		Q460N5|PAR14_HUMAN			5259.3	4.5	0
SVTEIQEKW	44.23	1118.56	9	-0.5	560.287	45.05	6270000	130000000	Q9NR30|DDX21_HUMAN			275.5	0.6	1
TAKISDFSW	44.36	1053.51	9	-0.5	527.764	56.89	9160000	92400000	Q09028|RBBP4_HUMAN:Q16576|RBBP7_HUMAN			25.6	0.07	1
TAKSQLVEI	13.72	987.56	9	-0.7	330.194	26.39	647000		Q9BYP7|WNK3_HUMAN			11093.6	9.5	0
TALPLLKQF	36.73	1029.62	9	0.9	515.819	64.05	8160000	12500000	Q9Y2P8|RCL1_HUMAN			32.2	0.1	1
TIKKETDVF	17.27	1079.59	9	-2.1	540.799	24.91	1650000	1220000	P35251|RFC1_HUMAN			18958	20	0
TISRQALSL	12.36	987.571	9	1.2	330.198	21.15	423000		O00750|P3C2B_HUMAN			13110.6	12	0
TLTQVKTFF	12.77	1083.6	9	1.6	542.806	41.23	9650000		Q8IZ40|RCOR2_HUMAN			13554.4	13	0
TSKPVQM(+15.99)M(+15.99)F	42.85	1099.5	9	0.1	550.759	28.14	57300000	64800000	P48595|SPB10_HUMAN	Oxidation (M)	M7:Oxidation (M):1000.00;M8:Oxidation (M):1000.00	5064.4	4.5	0
TSKPVQM(+15.99)MF	27.56	1083.51	9	-0.2	542.762	36.63	2000000	6750000	P48595|SPB10_HUMAN	Oxidation (M)	M7:Oxidation (M):40.00	366.3	0.7	1
TSKPVQMM(+15.99)F	30.1	1083.51	9	1.3	542.763	39.49	5470000	12300000	P48595|SPB10_HUMAN	Oxidation (M)	M8:Oxidation (M):30.46	364	0.7	1
TSLFIARSF	12.82	1040.57	9	1.1	521.291	59.6	1250000	2200000	Q14008|CKAP5_HUMAN			104.1	0.3	1
TSRKNTPHF	27.82	1086.56	9	0.6	363.193	16.92	2120000	2690000	Q14684|RRP1B_HUMAN			996.5	1.3	1
TTHNIPQTF	40.23	1057.52	9	-0.1	529.767	37.4	19300000	24700000	Q13029|PRDM2_HUMAN			434.5	0.8	1
TTKRPNTFF	32.86	1110.58	9	-2.2	556.297	31.02	2820000	1530000	Q02543|RL18A_HUMAN			658.4	1	1
TTLEHQKTF	58.64	1103.56	9	1.7	552.789	24.09	37100000	50000000	Q13347|EIF3I_HUMAN			144.4	0.4	1
TTRGLDPLF	13.27	1018.54	9	-0.1	510.28	54.9	3490000	7170000	Q96HW7|INT4_HUMAN			472.9	0.8	1
TTSRVLKVL	30.83	1015.64	9	2.2	508.828	32.7	8720000	10100000	P35222|CTNB1_HUMAN:P14923|PLAK_HUMAN			674.9	1	1
TVKISNYGW	35.79	1066.54	9	0.3	534.28	51.71	1140000	26200000	Q9HB71|CYBP_HUMAN			203.8	0.5	1
V(+42.01)SPKTLLTF	11.36	1046.6	9	-0.5	524.308	68.51	2300000	5670000	Q9H6S0|YTDC2_HUMAN	Acetylation (N-term)	V1:Acetylation (N-term):1000.00	9744.9	8.5	0
VAKKIHEEF	34.23	1099.6	9	0.3	550.809	20.56	3290000	762000	Q9Y2L1|RRP44_HUMAN			1681.5	1.9	1
VAKRVSEEF	14.51	1063.57	9	0.6	532.791	23.6	394000		Q14562|DHX8_HUMAN			1712.9	1.9	1
VAKVGQYTF	25	1011.54	9	0.3	506.777	44.8	6530000	9440000	Q86Y39|NDUAB_HUMAN			438.3	0.8	1
VATQAKFTF	13.77	1011.54	9	0.3	506.777	44.8	5250000	3400000	Q6ZUA9|MROH5_HUMAN			874.3	1.2	1
VIHKEATVF	15.66	1042.58	9	2.9	348.535	28.65	11900000		Q6PIW4|FIGL1_HUMAN			7573.8	6.5	0
VLERAKPEY	14.12	1103.6	9	-2.2	552.805	49.14	213000		Q13823|NOG2_HUMAN			26242.5	37	0
VSAGIQTSF	27.81	908.46	9	0.2	455.238	51.3	9590000	10300000	P17844|DDX5_HUMAN			121.2	0.4	1
VSAIVEQSW	32.78	1017.51	9	0.6	509.764	58.22	306000	5600000	P63146|UBE2B_HUMAN:P49459|UBE2A_HUMAN			10.3	0.015	1
VSAQIRKNF	15.74	1061.6	9	-0.7	354.873	26.67	2460000	2160000	Q8IU85|KCC1D_HUMAN			1581.2	1.8	1
VSIRDILSW	11.98	1087.6	9	1	544.809	46.19	1130000		Q9NU22|MDN1_HUMAN			10.1	0.015	1
VSKAPAPTF	57.79	916.502	9	-0.1	459.258	33.5	25900000	29900000	A6NCL7|AN33B_HUMAN			512.5	0.9	1
VSKPDLITF	32.07	1018.57	9	1.6	510.293	55.24	72700000	92800000	Q7Z2F6|ZN720_HUMAN:Q14586|ZN267_HUMAN			364.7	0.7	1
VSKPSAPVF	45.78	930.518	9	-1.7	466.265	38.29	35600000	42100000	Q69YN4|VIR_HUMAN			601.1	1	1
VSKRLHQRF	38.32	1169.68	9	-0.2	390.9	17.33	20400000	24700000	Q96ST3|SIN3A_HUMAN			187.8	0.5	1
VSKSVTQGF	52.45	951.503	9	2	476.76	30.35	9830000	12800000	Q92599|SEPT8_HUMAN			1122.7	1.4	1
VSNPKSFEY	31.43	1069.51	9	4.1	535.763	35.59	7390000	5740000	Q8IXI2|MIRO1_HUMAN			1688.8	1.9	1
VSRLLHLHF	15.86	1120.65	9	1.4	374.558	42.1	1820000	6060000	A8MT69|CENPX_HUMAN			395.5	0.7	1
VSRPVQVYF	23.12	1093.59	9	0.1	547.803	49.14	32700000	48000000	Q14934|NFAC4_HUMAN			33.9	0.1	1
VSSHVERVF	17.88	1058.55	9	0.4	530.283	29.3	3950000	4910000	Q9NX04|CA109_HUMAN			203.4	0.5	1
VSSKVQRLL	18.64	1028.63	9	-0.9	343.885	28.83	3290000	3350000	A1A4S6|RHG10_HUMAN			418.2	0.8	1
VSYKGSISY	34.44	1002.5	9	-1.3	502.258	37.38	591000	1380000	Q6SPF0|SAMD1_HUMAN			1189.2	1.5	1
VTHSVRIGF	39.03	1014.56	9	-0.3	508.288	35.57	37200000	47600000	P26010|ITB7_HUMAN			1742.3	1.9	1
VTKITLESF	25.91	1036.58	9	-0.6	519.297	53.86	2720000		Q8WU90|ZC3HF_HUMAN			804.6	1.2	1
VTKKIKVEF	31.57	1090.67	9	-1.3	546.344	27.03	12500000	14800000	Q8NEN9|PDZD8_HUMAN			1083.2	1.4	1
VTKSTQNSF	23	1010.5	9	0.1	506.259	20.33	1300000	1760000	P46063|RECQ1_HUMAN			412.7	0.8	1
VTKSVDFHF	20.85	1078.54	9	0.3	360.522	42.39	5760000	5270000	Q9ULW0|TPX2_HUMAN			514.6	0.9	1
VTNPHSSQW	44.7	1054.48	9	-0.1	528.249	25.74	1300000	138000000	P24522|GA45A_HUMAN			31.3	0.09	1
VTNPHTDAW	42.45	1039.47	9	0.1	520.744	30.71	3600000	186000000	O75293|GA45B_HUMAN			368.5	0.7	1
VTNPYQATI	12	1005.51	9	0.4	503.764	48.91	1310000	507000	P49005|DPOD2_HUMAN			2197.1	2.5	0
VTRAKQIVW	18.82	1099.65	9	0.3	550.832	30.79	1700000	95300000	P00558|PGK1_HUMAN			18.7	0.04	1
VTRPTGVSF	23.94	962.519	9	0.2	482.267	38.28	6120000	9110000	A5YKK6|CNOT1_HUMAN			99.5	0.3	1
VTRVITDVY	17.85	1064.59	9	0.3	533.301	42.07	2030000	3330000	Q12888|TP53B_HUMAN			2077.6	2.5	0
VTSEHTYDF	19.28	1097.47	9	-0.6	549.74	37.58	334000	1060000	P23921|RIR1_HUMAN			1372.2	1.6	1
VTSPIRASY	19.55	992.529	9	-0.1	497.272	36.56	850000	362000	P55082|MFAP3_HUMAN			165.9	0.4	1
VTTVVNPKY	47.89	1019.57	9	-1.3	510.789	34.37	9990000	11500000	P05556|ITB1_HUMAN			1614.6	1.8	1
VTYKNVPNW	49.69	1119.57	9	0.3	560.793	46.27	22700000	300000000	P62826|RAN_HUMAN			44.2	0.15	1
VTYVPVTTF	32.39	1025.54	9	0.1	513.779	66.42	8340000	11000000	P62899|RL31_HUMAN			146	0.4	1
VVM(+15.99)PIAHEF	28.02	1057.53	9	-1.5	529.77	43.4	10200000	12100000	Q9UQL6|HDAC5_HUMAN	Oxidation (M)	M3:Oxidation (M):1000.00	4615.3	4.5	0
YAKRAFVHW	24.24	1176.62	9	0.7	393.214	31.43	10900000	71900000	P68363|TBA1B_HUMAN:P68366|TBA4A_HUMAN:Q71U36|TBA1A_HUMAN:P0DPH8|TBA3D_HUMAN:P0DPH7|TBA3C_HUMAN:Q9BQE3|TBA1C_HUMAN:Q9NY65|TBA8_HUMAN			74.4	0.25	1
YALRAITRY	18.24	1125.63	9	1.7	376.218	39.09	1060000	3140000	P58004|SESN2_HUMAN:Q9Y6P5|SESN1_HUMAN			184.3	0.5	1
YSKRVYIAY	23.49	1161.62	9	0.2	581.817	33.38	2200000	5080000	Q8TCJ2|STT3B_HUMAN			5197.4	4.5	0
YSLKKRHFF	30.48	1224.68	9	-0.1	409.233	27.93	5430000	7240000	Q8IVB4|SL9A9_HUMAN:Q96T83|SL9A7_HUMAN			379.7	0.7	1
YSTPHAFTF	21.87	1069.49	9	0.1	535.751	54.59	2010000		P04049|RAF1_HUMAN			400.3	0.8	1
YSVRVSPQM(+15.99)	33.34	1081.52	9	3	541.77	31.93	1430000	1490000	Q9Y2P8|RCL1_HUMAN	Oxidation (M)	M9:Oxidation (M):1000.00	6052.4	5.5	0
YTDNLVRVW	46.45	1164.59	9	-0.3	583.303	58.66	8020000	63800000	P63244|RACK1_HUMAN			268.1	0.6	1
YTHEVVTLW	23.35	1146.57	9	0	574.293	58.55	3720000	20500000	P24941|CDK2_HUMAN:P06493|CDK1_HUMAN:Q00526|CDK3_HUMAN			15	0.03	1
YTHQVVTRW	27.16	1188.6	9	-0.1	397.209	31.33	338000	14000000	P50613|CDK7_HUMAN			23.3	0.06	1
YTLRHARGY	28.2	1135.59	9	-0.2	379.537	21.81	376000	297000	Q9ULT8|HECD1_HUMAN			945.3	1.3	1
YTLRILRQL	16.43	1174.72	9	-1.7	392.579	53.48	9390000	19900000	Q96DU3|SLAF6_HUMAN			263.8	0.6	1
YTYRGPKAF	49.69	1101.56	9	0.8	551.788	36.3	119000000	149000000	Q12874|SF3A3_HUMAN			1287.8	1.6	1
YVTLRVPLY	21.53	1122.64	9	-0.5	562.329	60.56	1830000	9890000	Q5SZK8|FREM2_HUMAN			16475.4	16	0
A(+42.01)VKSNIVTSI	11.82	1072.61	10	0.6	358.545	35.21	656000		Q9H9A6|LRC40_HUMAN	Acetylation (N-term)	A1:Acetylation (N-term):1000.00	25018.7	34	0
A(+42.01)YQEARGVAM	10.21	1136.53	10	0.2	569.272	30.11	486000		Q8TEM1|PO210_HUMAN	Acetylation (N-term)	A1:Acetylation (N-term):1000.00	23545	30	0
AAGLSLHPTY	11.51	1028.53	10	-0.6	515.271	48.12	2180000		Q16787|LAMA3_HUMAN			5175.7	4.5	0
AGLLTQKLTY	12.27	1106.63	10	3.4	554.326	49.78	215000		P11717|MPRI_HUMAN			13261.6	12	0
AGTLSGHASW	32.72	985.462	10	-0.5	493.738	35.91	1670000	2040000	Q9GZS3|WDR61_HUMAN			70.7	0.25	1
ALVHAVQALW	13.96	1106.62	10	0	554.319	56.41	507000		P24001|IL32_HUMAN			69.6	0.2	1
AQSLGTTYIY	12.72	1115.55	10	-1	558.782	31.35	339000	858000	Q13085|ACACA_HUMAN			800.7	1.2	1
AQTVSPAEKW	22.01	1115.56	10	-1.4	558.787	37.58	9400000	13300000	Q16658|FSCN1_HUMAN			142.7	0.4	1
ASLSTFQQM(+15.99)W	16.33	1213.54	10	-0.3	607.779	66.08	241000	7880000	P60709|ACTB_HUMAN:P68133|ACTS_HUMAN:P68032|ACTC_HUMAN:P0CG39|POTEJ_HUMAN:Q6S8J3|POTEE_HUMAN:A5A3E0|POTEF_HUMAN:P0CG38|POTEI_HUMAN:Q562R1|ACTBL_HUMAN	Oxidation (M)	M9:Oxidation (M):1000.00	14.8	0.03	1
ASLYLARSKS	10.45	1094.61	10	0.5	548.312	40.59	113000		Q96HP0|DOCK6_HUMAN			24722.4	33	0
ASSLKKKQIW	14.77	1187.7	10	0.6	396.908	22.52	177000		Q16658|FSCN1_HUMAN			109	0.3	1
ASSRQIISHW	10.82	1183.61	10	1.5	395.545	34.52	840000		Q09472|EP300_HUMAN:Q92793|CBP_HUMAN			51.2	0.15	1
ASVTEIQEKW	35.32	1189.6	10	-1	595.806	46.39	5160000	4370000	Q9NR30|DDX21_HUMAN			57.4	0.175	1
ATGGRIVPRF	20.23	1072.61	10	0.9	358.546	33.9	4520000	6420000	P48643|TCPE_HUMAN			4005	4	0
ATLSVKGARF	11.99	1048.6	10	2.3	350.542	24.03	80100		Q8WU66|TSEAR_HUMAN			730.3	1.1	1
ATRDELPYTF	15.03	1211.58	10	1.7	606.799	55.17	5490000	9870000	P78316|NOP14_HUMAN			952.9	1.3	1
ATRKPLVQTT	10.43	1113.65	10	2.3	557.834	37.58	1460000		Q9H920|RN121_HUMAN			13922.2	13	0
ATSGDYLRVW	38.01	1166.57	10	0.3	584.293	57.96	800000	8010000	P61962|DCAF7_HUMAN			111.7	0.3	1
AVTALAARTW	38.74	1058.59	10	-0.4	530.301	47.34	1910000	28300000	Q9UII2|ATIF1_HUMAN			44.7	0.15	1
CHVSSLR(+.98)IPY	12.3	1174.58	10	0.8	588.298	41.89	315000		Q9NW08|RPC2_HUMAN	Citrullination	R7:Citrullination:1000.00	1507.4	1.7	1
DLSTLQEKMA	13.24	1134.56	10	-1.1	568.286	39.87	7870000	1260000	Q14980|NUMA1_HUMAN			22527	27	0
ELQQKISVLY	12.59	1219.68	10	0.7	407.568	50.55	3620000		Q13206|DDX10_HUMAN			22938.2	28	0
ELTFIPRDAF	10.54	1207.62	10	-2	604.818	27.5	1670000		O14498|ISLR_HUMAN			6466.8	5.5	0
ETSTSLKDLF	10.47	1139.57	10	0	380.864	37.45	664000		Q99715|COCA1_HUMAN			2723.6	3	0
FGAVAAASHL	16.18	942.492	10	-0.5	472.253	34.71	2610000	2930000	Q99581|FEV_HUMAN			12920.4	12	0
FGSESVKSIF	13.94	1099.55	10	1.6	550.786	38.49	1990000	1590000	P49792|RBP2_HUMAN			7579.5	6.5	0
GSKCKGQLLI	11.87	1045.6	10	0.7	523.805	59.59	492000		Q9P258|RCC2_HUMAN			9746.1	8.5	0
GTALQEISFW	19.52	1150.57	10	-0.4	576.29	53.93	7370000	27000000	Q14204|DYHC1_HUMAN			109.8	0.3	1
GTLKIANKQF	28.98	1118.64	10	-0.3	560.33	32.56	1790000	2190000	P27694|RFA1_HUMAN			272.6	0.6	1
H(+42.01)GRVPTQQEA	11.51	1163.57	10	-0.1	582.791	20.34	35300		Q8NE62|CHDH_HUMAN	Acetylation (N-term)	H1:Acetylation (N-term):1000.00	28848.7	47	0
HAIPSRMTIG	19.24	1081.57	10	0.2	541.793	33.62	6720000	7810000	P30876|RPB2_HUMAN			973	1.3	1
HALPRPTGSF	13.4	1081.57	10	-0.5	541.79	32.76	4290000	11600000	A0A096LP49|CC187_HUMAN			263.3	0.6	1
HSGDHGKRLF	45.74	1152.58	10	-0.3	385.2	17.37	4370000	3820000	O43674|NDUB5_HUMAN			2319.3	2.5	0
HSM(+15.99)SDPGVSY	19.39	1094.43	10	1.4	548.225	27.11	12200000	12900000	P29803|ODPAT_HUMAN:P08559|ODPA_HUMAN	Oxidation (M)	M3:Oxidation (M):1000.00	185.1	0.5	1
HSNPSAYRM(+15.99)F	19.32	1224.53	10	-1	409.185	26.4	2350000		Q9P2P5|HECW2_HUMAN	Oxidation (M)	M9:Oxidation (M):1000.00	138	0.4	1
HSVKASANR(+.98)F	11	1116.57	10	0.1	373.197	17	98200		O75592|MYCB2_HUMAN	Citrullination	R9:Citrullination:1000.00	136.5	0.4	1
HTAKISDFSW	44.3	1190.57	10	-1.5	596.292	47.72	1650000	24100000	Q09028|RBBP4_HUMAN:Q16576|RBBP7_HUMAN			8.6	0.01	1
HTAVVEDVSW	50.15	1141.54	10	0.5	571.778	50.1	5340000	34500000	Q09028|RBBP4_HUMAN			10.8	0.02	1
HTFQNDIHVY	48.61	1272.59	10	0.6	637.302	39.67	28000000	38800000	Q15392|DHC24_HUMAN			86.6	0.25	1
IAANEENRKW	35.53	1229.62	10	0.1	615.815	25.29	450000	60400000	O75368|SH3L1_HUMAN			30.8	0.09	1
IAASRPSRGW	10.77	1099.59	10	-7.7	550.797	41.67	267000		Q96JP5|ZFP91_HUMAN			36.2	0.125	1
IAVDPR(+.98)HLSL	14.37	1120.62	10	-0.8	374.548	28.03	2300000	995000	O95602|RPA1_HUMAN	Citrullination	R6:Citrullination:1000.00	7751.8	6.5	0
ISADPSRKFA	11.11	1090.58	10	2.3	546.297	35.29	1420000		B7ZC32|KIF28_HUMAN			4537.7	4	0
ISASSLTSKW	40.21	1078.57	10	-0.1	540.29	50.4	485000	12500000	Q6PIW4|FIGL1_HUMAN			21.9	0.06	1
ISFHNIHNTF	48.06	1228.6	10	-0.9	615.306	44.1	54500000	81700000	O43684|BUB3_HUMAN			29.5	0.09	1
ISKQDAQELF	21.53	1177.6	10	0.4	589.807	46.13	4290000	3110000	Q9BZJ0|CRNL1_HUMAN			549.6	0.9	1
ISQPASGNTF	50.73	1020.49	10	-0.3	511.251	39.31	62400000	76800000	Q14157|UBP2L_HUMAN			411.7	0.8	1
ITGQTSVVSF	14.73	1037.54	10	0.8	519.777	35.93	232000		Q00653|NFKB2_HUMAN			1829.2	2	1
ITKADAAEFW	39.11	1150.57	10	1	576.291	53.76	7370000	60100000	Q13191|CBLB_HUMAN:P22681|CBL_HUMAN			22.5	0.06	1
ITKGYVIRLY	32.48	1224.72	10	-0.6	409.248	47.55	9590000	14700000	Q9BUB7|TMM70_HUMAN			686.7	1.1	1
ITKPPDGSAF	43.62	1031.53	10	-0.3	516.771	37.17	5830000	7380000	Q8N697|S15A4_HUMAN			1779	1.9	1
ITKQVPNESF	45.42	1161.6	10	-1.3	581.808	35	4150000	4570000	Q99733|NP1L4_HUMAN			1276.1	1.6	1
ITSQDVLHSW	48.79	1184.58	10	1.4	593.299	57.16	31200000	328000000	P00403|COX2_HUMAN			13.3	0.025	1
K(+42.01)NSTIKIQAM(+15.99)	16.61	1190.63	10	-1.8	397.884	23.33	431000		Q8IZT6|ASPM_HUMAN	Acetylation (N-term); Oxidation (M)	K1:Acetylation (N-term):1000.00;M10:Oxidation (M):1000.00	7297.2	6.5	0
KAAEAAASAY	39.87	951.466	10	0.2	476.74	20.9	1940000	2290000	Q969T9|WBP2_HUMAN			1046.4	1.4	1
KAFLTLAEDI	10.73	1119.62	10	2.2	560.817	45.52	582000		P61026|RAB10_HUMAN			2336.1	2.5	0
KAGQVVTIWA	10.73	1071.61	10	0	536.811	50.72	4100000	5910000	P02545|LMNA_HUMAN			170	0.4	1
KAHPPELKKF	47.31	1193.69	10	-0.8	398.904	21.15	87000000	103000000	P62308|RUXG_HUMAN:A8MWD9|RUXGL_HUMAN			108.5	0.3	1
KAIRLEVLDA	14.74	1126.67	10	0.5	564.343	40.74	2100000	3580000	Q4G0P3|HYDIN_HUMAN			4212.3	4	0
KAKM(+15.99)TDFDRF	29.01	1273.61	10	-0.2	425.545	25.98	574000	358000	P50914|RL14_HUMAN	Oxidation (M)	M4:Oxidation (M):1000.00	920.7	1.3	1
KAKRSDELSF	14.54	1179.62	10	0.9	394.216	23.7	4040000	1930000	P16885|PLCG2_HUMAN			311.3	0.6	1
KALADVEVTY	30.53	1107.58	10	0	554.798	46.35	10300000	9950000	P52888|THOP1_HUMAN			80.4	0.25	1
KALATSVLDI	15.79	1029.61	10	0.8	515.811	42.69	6460000		Q9P2D7|DYH1_HUMAN			677.3	1	1
KALELDSNLY	22.54	1164.6	10	0.5	583.309	51.75	1060000	1870000	P35579|MYH9_HUMAN			259.5	0.6	1
KALQDVQIRF	20.87	1216.69	10	0.3	609.354	47.41	3460000	6340000	Q6P2E9|EDC4_HUMAN			155.5	0.4	1
KALTM(+15.99)NNLTF	12.35	1167.6	10	-0.4	584.805	34.62	797000		O75962|TRIO_HUMAN	Oxidation (M)	M5:Oxidation (M):1000.00	211.6	0.5	1
KARPIPRSTY	15.75	1187.68	10	0.5	396.9	19.7	1640000	2400000	Q3B820|F161A_HUMAN			147.7	0.4	1
KARREAKVKF	33.6	1231.75	10	0	411.591	15.6	17300000	14900000	P61353|RL27_HUMAN			107.4	0.3	1
KARVETQNHW	27.44	1267.64	10	-0.8	423.554	18.61	769000	77600000	P28066|PSA5_HUMAN			13.5	0.025	1
KASESPSIFW	12.95	1150.57	10	-0.2	576.29	54.21	5090000		Q9NR99|MXRA5_HUMAN			48.9	0.15	1
KATHPPSSSL	11.33	1023.53	10	2	512.776	29.97	224000		Q08289|CACB2_HUMAN			2435.6	2.5	0
KAVDIVKQVW	53.32	1184.69	10	-0.5	593.353	47.88	5810000	71000000	Q460N5|PAR14_HUMAN			21.7	0.05	1
KAVIDLNNRW	32.91	1227.67	10	-0.4	410.231	45.44	1110000	28600000	P0DN76|U2AF5_HUMAN:Q01081|U2AF1_HUMAN			17	0.04	1
KGFSEEHNTW	45.32	1233.54	10	-0.2	617.778	29.45	5490000	116000000	P45973|CBX5_HUMAN			18	0.04	1
KGLWDSIKSF	17.31	1179.63	10	-2.5	394.216	23.7	4250000	1590000	Q9NYU1|UGGG2_HUMAN			3559.4	3.5	0
KHALEKAEEL	12.12	1166.63	10	0.4	389.884	36.73	3460000		Q15811|ITSN1_HUMAN			8570.2	7.5	0
KIYPGHGRRY	33.45	1245.67	10	0.1	416.232	16.68	193000000	266000000	P83731|RL24_HUMAN			5379.3	5	0
KLFDHAVSKF	16.06	1190.64	10	-0.9	397.889	37.61	1930000	840000	O60488|ACSL4_HUMAN			6016.8	5.5	0
KLTPELGLIL	10.88	1095.69	10	3.8	366.239	37.98	79400		Q9UKK3|PARP4_HUMAN			10993.9	9.5	0
KLVLAAASLL	10.8	997.654	10	0	499.834	40.8	766000	928000	Q9NUA8|ZBT40_HUMAN			4126.9	4	0
KNYAAALETF	14.45	1126.57	10	1.3	564.291	46.32	237000	673000	Q9Y2Z0|SGT1_HUMAN			2890.5	3	0
KSAASEQHVF	19.69	1102.54	10	0.4	552.278	22.7	620000	1420000	Q92620|PRP16_HUMAN			50.2	0.15	1
KSAEAVGVKI	54.64	1000.59	10	-0.7	501.303	26.8	16600000	20700000	P27694|RFA1_HUMAN			1157.5	1.5	1
KSAEHFKRKF	45.23	1276.7	10	-0.5	426.575	16.95	2880000	3960000	Q8IXW5|RPAP2_HUMAN			177.2	0.5	1
KSALIIQKHW	31.81	1222.72	10	0.3	408.58	31.3	568000	10300000	Q15051|IQCB1_HUMAN			7.2	0.01	1
KSAPSDSLTY	20.39	1067.51	10	0.1	534.764	31.44	7860000	9050000	Q15042|RB3GP_HUMAN			264.8	0.6	1
KSARVKGLSF	19.54	1091.64	10	-1.9	546.829	25.22	6020000	248000	P53621|COPA_HUMAN			84.5	0.25	1
KSFEKAKESW	42.89	1238.63	10	0.4	620.322	22.26	1060000	80200000	Q02790|FKBP4_HUMAN:Q13451|FKBP5_HUMAN			8.1	0.01	1
KSFPARLRQY	22.58	1264.7	10	-1.6	422.575	26.17	13100000	16900000	Q14204|DYHC1_HUMAN			27	0.08	1
KSFPFVKTFI	10.41	1212.69	10	1.5	607.354	49.19	498000		A8TX70|CO6A5_HUMAN			32.8	0.1	1
KSFSDLFKRF	24.59	1273.68	10	0.5	425.568	55.09	1920000	6560000	Q9Y6A5|TACC3_HUMAN			24	0.06	1
KSFSDTLKTY	51.76	1188.6	10	0.5	595.309	37.86	25700000	29800000	Q9BUL8|PDC10_HUMAN			38.7	0.125	1
KSFSESGINY	12.63	1130.52	10	-0.6	566.269	39.72	1240000	1910000	O60762|DPM1_HUMAN			390.8	0.7	1
KSGLESTVCV	14.14	1021.51	10	-1.9	511.762	34.91	534000		Q15842|KCNJ8_HUMAN			7036.2	6	0
KSGPVVSLGW	34.49	1028.57	10	0.6	515.29	55.33	2890000	41900000	Q9H269|VPS16_HUMAN			15.4	0.03	1
KSHYDEAYKW	33.79	1325.6	10	0.6	442.875	29.76	256000	8850000	Q92624|APBP2_HUMAN			7.7	0.01	1
KSINSEVLKF	17.87	1163.65	10	-1	582.834	42.52	1890000	2290000	Q7Z333|SETX_HUMAN			117.6	0.3	1
KSIQEVQKRF	25.93	1261.71	10	0.2	421.579	23.21	652000	944000	P42285|MTREX_HUMAN			79.3	0.25	1
KSITEINANF	40.74	1135.59	10	-1.7	568.8	47.29	8850000	11600000	Q8IVF6|AN18A_HUMAN:A2A2Z9|AN18B_HUMAN			386.4	0.7	1
KSITIIGGGF	20.05	991.57	10	1	496.793	55.4	695000	1070000	O95831|AIFM1_HUMAN			493.9	0.9	1
KSKESESFVF	21.93	1186.59	10	0.7	396.536	37.05	13100000	10200000	A2VDJ0|T131L_HUMAN			226.2	0.5	1
KSKGNYDEGF	33.12	1143.52	10	1.9	572.768	24.2	3830000	5430000	Q9UHB6|LIMA1_HUMAN:Q9BT23|LIMD2_HUMAN			2390.9	2.5	0
KSKPVNKDRY	27.74	1233.68	10	0.3	412.235	13.68	87400	252000	P62316|SMD2_HUMAN			152	0.4	1
KSKRNLQDNF	20.06	1248.66	10	-0.1	625.336	20.09	22500000	28100000	P42224|STAT1_HUMAN			568.2	0.9	1
KSKTAKLQDF	17.11	1164.65	10	-1.4	389.224	19.79	977000	665000	P34897|GLYM_HUMAN			408.1	0.8	1
KSLALKEKHF	40.32	1199.7	10	-0.2	400.908	20.88	4200000	4550000	Q92673|SORL_HUMAN			34.9	0.1	1
KSLDHQGINF	51.62	1157.58	10	-1.3	579.798	35.5	55700000	64700000	Q96ST3|SIN3A_HUMAN			1102.7	1.4	1
KSLEDVVRAY	36.63	1178.63	10	-0.8	590.322	47.22	25000000	35000000	Q14152|EIF3A_HUMAN			259	0.6	1
KSLPAEINRM	25.74	1157.62	10	-1.3	386.881	32.05	346000	664000	Q9H9A6|LRC40_HUMAN			75	0.25	1
KSLPAEINRM(+15.99)	39.28	1173.62	10	-1.5	392.213	25.27	19300000	23000000	Q9H9A6|LRC40_HUMAN	Oxidation (M)	M10:Oxidation (M):1000.00	316.2	0.6	1
KSR(+.98)GYVKEQF	11.96	1241.64	10	-0.4	414.887	22.78	747000	485000	P46783|RS10_HUMAN	Citrullination	R3:Citrullination:1000.00	66.3	0.2	1
KSRGIGTVTF	30.28	1064.6	10	-1.4	355.873	35.37	87400000	98100000	P52272|HNRPM_HUMAN			72.4	0.25	1
KSRGYVKEQF	47.4	1240.66	10	-0.8	621.335	20.99	397000000	540000000	P46783|RS10_HUMAN			133.1	0.4	1
KSRPELLEYY	20.37	1296.67	10	0.2	433.231	45.15	1910000	1300000	Q14258|TRI25_HUMAN			99.6	0.3	1
KSRRVDFETF	18.43	1283.66	10	-0.3	428.895	33.2	1080000	459000	P14649|MYL6B_HUMAN			30.7	0.09	1
KSSQVQRRFF	13.52	1281.69	10	-0.5	428.238	25.42	36500000	18300000	P13010|XRCC5_HUMAN			104.8	0.3	1
KSTRAPLLTT	15.49	1086.64	10	3	544.329	32.33	502000		A1L4H1|SRCRL_HUMAN			3111.3	3	0
KSVENLGVSY	33.24	1094.56	10	-0.8	548.287	41.88	27600000	33600000	P49643|PRI2_HUMAN			395.5	0.7	1
KSVKIKTKLF	40.27	1190.78	10	-0.5	397.932	25.65	4030000	5030000	Q8NI27|THOC2_HUMAN			50.5	0.15	1
KSYGNEKRFF	36.74	1274.64	10	2.4	425.889	27.18	1380000	3470000	Q06330|SUH_HUMAN:Q9UBG7|RBPJL_HUMAN			68.8	0.2	1
KTAEEVAALI	17.86	1043.59	10	1.7	522.801	51.55	7940000	3650000	Q6P2Q9|PRP8_HUMAN			1292.4	1.6	1
KTAGYPNVNI	19	1075.57	10	1.5	538.791	41.49	997000		Q01082|SPTB2_HUMAN			4395.5	4	0
KTAIREAQTF	46.2	1163.63	10	-0.9	582.822	26.23	31100000	24800000	Q9UIG0|BAZ1B_HUMAN			100.1	0.3	1
KTAVIDHHNY	67.32	1196.59	10	-0.7	599.304	19.57	29700000	39000000	P39656|OST48_HUMAN			252.2	0.6	1
KTEADAEKTF	51.79	1138.55	10	0.8	570.283	21.47	9130000	10400000	P19338|NUCL_HUMAN			446.3	0.8	1
KTFKDVGNLL	30.25	1133.64	10	-0.2	567.829	45.76	12900000	18500000	Q9NTJ3|SMC4_HUMAN			135.7	0.4	1
KTGSGLNSFY	12.9	1072.52	10	-0.7	537.266	36.24	4690000		P49792|RBP2_HUMAN:O14715|RGPD8_HUMAN:Q99666|RGPD5_HUMAN			822.8	1.2	1
KTIEGIYEKF	31.14	1226.65	10	-0.4	614.334	43.61	10100000	13400000	Q96RT8|GCP5_HUMAN			174.7	0.4	1
KTIPYSDKLF	17.93	1210.66	10	1.2	606.338	47.14	3090000	7280000	Q16891|MIC60_HUMAN			54.5	0.175	1
KTISNGFGFK	14.4	1097.59	10	-0.8	549.8	34.2	794000	1020000	P04049|RAF1_HUMAN			831.6	1.2	1
KTKADGSFRL	37.47	1121.62	10	0.3	374.88	22.64	3410000	3970000	Q5JPE7|NOMO2_HUMAN:Q15155|NOMO1_HUMAN:P69849|NOMO3_HUMAN			980.6	1.3	1
KTKDGVREVF	44.18	1177.65	10	0.3	589.83	23.66	228000000	274000000	P61586|RHOA_HUMAN			737.5	1.1	1
KTKEGVREVF	40.18	1191.66	10	-1.4	398.227	23.07	71100000	89300000	P08134|RHOC_HUMAN:P62745|RHOB_HUMAN			657.8	1	1
KTKEQILEEF	20.08	1263.67	10	-0.4	632.842	44.11	12400000	20600000	O60506|HNRPQ_HUMAN			887.5	1.2	1
KTKLFSLEHF	20.12	1248.69	10	0.3	417.236	43.97	1010000	1960000	Q13568|IRF5_HUMAN			409.2	0.8	1
KTKNANILGF	14.52	1104.63	10	0.9	553.322	40.46	4490000	1290000	Q96DM3|RMC1_HUMAN			384.8	0.7	1
KTKNAQQVHF	54.18	1199.64	10	0	400.888	17.91	39700000	50800000	Q66K89|E4F1_HUMAN			237.2	0.5	1
KTKPQPIPNF	21.58	1168.66	10	1.1	390.561	33.56	1310000	839000	Q14674|ESPL1_HUMAN			1315.5	1.6	1
KTKSENGLEF	41.36	1151.58	10	-0.9	576.798	27.9	30900000	37500000	P21796|VDAC1_HUMAN			622	1	1
KTLDQAIM(+15.99)KF	55.9	1209.64	10	1.1	605.829	39.67	112000000	147000000	Q92878|RAD50_HUMAN	Oxidation (M)	M8:Oxidation (M):1000.00	75.1	0.25	1
KTLDQAIMKF	38.03	1193.65	10	-0.8	597.831	49.23	8270000	22500000	Q92878|RAD50_HUMAN			49.6	0.15	1
KTLDSQTRTF	37.4	1195.62	10	-0.5	399.547	25.7	5110000	6060000	P46379|BAG6_HUMAN			111	0.3	1
KTLEDALHC(+119.00)F	26.75	1294.57	10	0.6	432.53	51.31	3190000	5910000	Q9UMW8|UBP18_HUMAN:Q3LFD5|UBP41_HUMAN	Cysteinylation	C9:Cysteinylation:1000.00	60	0.175	1
KTLETHIKIF	34.11	1228.72	10	-0.3	410.58	40.56	12400000	19900000	Q9H2P0|ADNP_HUMAN			65.8	0.2	1
KTLGDFAAEY	37.04	1113.53	10	-0.1	557.774	53.05	6280000	9660000	P09874|PARP1_HUMAN			214.5	0.5	1
KTLHDTRTHF	39.13	1254.65	10	-0.3	419.223	17.83	3820000	4710000	Q8IZT6|ASPM_HUMAN			100.9	0.3	1
KTLPADVQNY	50.25	1147.59	10	-0.9	574.8	36.36	49800000	60300000	Q99590|SCAFB_HUMAN			74.8	0.25	1
KTLPLTGSTF	44.56	1063.59	10	0.6	532.803	49.54	8850000	7260000	P55265|DSRAD_HUMAN			47	0.15	1
KTLTPIIQEY	40.7	1204.67	10	0.2	603.342	50.43	9900000	14000000	Q53EL6|PDCD4_HUMAN			101.1	0.3	1
KTLVIIEKTY	37.14	1206.72	10	0.4	604.369	39.94	1830000	3590000	Q86TB9|PATL1_HUMAN			40.2	0.125	1
KTNPDDRRII	17.14	1226.67	10	-1.2	409.898	21.57	2310000	1790000	P04818|TYSY_HUMAN			2710.8	3	0
KTNSSEGKVF	45.63	1095.56	10	0.8	548.786	19.07	2570000	3180000	Q9NWS0|PIHD1_HUMAN			233	0.5	1
KTPEEIRKTF	45.93	1247.69	10	-0.6	416.903	25.47	23500000	28700000	P63208|SKP1_HUMAN			1228.8	1.5	1
KTRAPGDHQF	12.03	1155.58	10	0.6	386.2	17.62	1350000		A2RUS2|DEND3_HUMAN			47.1	0.15	1
KTRDELERSF	30.39	1279.65	10	-2.5	427.557	26.3	2540000	1400000	Q12999|TSN31_HUMAN			122	0.4	1
KTREQVTEAF	33.17	1207.62	10	0.7	604.817	27.78	22700000	27000000	P27987|IP3KB_HUMAN			603.2	1	1
KTRGIFETKF	33.61	1225.68	10	-0.4	409.568	34.56	23600000	35500000	P19367|HXK1_HUMAN:P52789|HXK2_HUMAN			57.1	0.175	1
KTRHTGINLF	27.95	1185.66	10	-0.5	396.228	29.95	9540000	10800000	O75346|ZN253_HUMAN			88	0.25	1
KTRHVNILLF	13.66	1239.75	10	0.3	414.256	44.23	1950000	8660000	P04049|RAF1_HUMAN:P10398|ARAF_HUMAN:P15056|BRAF_HUMAN			60.9	0.175	1
KTRRPDNTAF	16.69	1204.63	10	0.5	402.551	18.2	35900000	46800000	Q9NV96|CC50A_HUMAN			131.5	0.4	1
KTSEAKIKHF	42.19	1187.67	10	1	396.896	16.24	4210000	4670000	Q02880|TOP2B_HUMAN			155.5	0.4	1
KTVAGGAWTY	37.93	1052.53	10	-0.7	527.271	40.45	1190000	39700000	P61513|RL37A_HUMAN			122	0.4	1
KTVEPTGKRF	47.75	1161.65	10	0.2	388.224	19.2	55100000	68800000	P10155|RO60_HUMAN			91.3	0.25	1
KTVIDSQTHY	34.74	1190.59	10	-1.3	596.303	26.92	2320000	2950000	Q9Y3Q3|TMED3_HUMAN			382.7	0.7	1
KTVTAM(+15.99)DVVY	38.32	1141.57	10	-0.8	571.791	36.7	66600000	64600000	P62805|H4_HUMAN	Oxidation (M)	M6:Oxidation (M):1000.00	176	0.4	1
KTVTAMDVVY	23.88	1125.57	10	-0.1	563.794	46.86	4650000	11700000	P62805|H4_HUMAN			144.7	0.4	1
KTYGEIFEKF	43.26	1260.64	10	-0.4	631.327	52.48	16500000	37800000	O95298|NDUC2_HUMAN			51.1	0.15	1
KTYQDIQNTI	17.47	1222.62	10	0.6	612.317	41.11	1930000	5210000	P24928|RPB1_HUMAN			578.5	0.9	1
KTYQEVAQKF	40.14	1240.65	10	-0.2	621.33	32.59	10400000	12800000	Q9NZK5|ADA2_HUMAN			94.8	0.3	1
KVFESWM(+15.99)HHW	39.62	1401.63	10	-0.7	468.217	40.27	781000	21700000	P04233|HG2A_HUMAN	Oxidation (M)	M7:Oxidation (M):1000.00	22.8	0.06	1
KVHFNLTDM(+15.99)L	11.11	1232.62	10	2.5	617.32	22.16	463000		Q9Y6X6|MYO16_HUMAN			5317.2	5	0
KVRPAELEQF	16.32	1215.66	10	-0.7	406.227	36.85	4770000	7290000	O43491|E41L2_HUMAN			570.1	0.9	1
KVSHNTVSLM(+15.99)	14.15	1130.58	10	-2.4	566.294	24.03	72300		Q8N9V7|TOPZ1_HUMAN	Oxidation (M)	M10:Oxidation (M):1000.00	3653.7	3.5	0
L(+42.01)SLSR(+.98)GKQDF	10.36	1192.61	10	-0.3	398.543	21.62	27600		O14715|RGPD8_HUMAN:Q99666|RGPD5_HUMAN	Acetylation (N-term); Citrullination	L1:Acetylation (N-term):1000.00;R5:Citrullination:1000.00	884.6	1.2	1
LAADLSLHSF	30.13	1072.56	10	0.5	537.285	58.93	3220000	4170000	Q8TEK3|DOT1L_HUMAN			1197.5	1.5	1
LALPPGAEHW	31.11	1089.56	10	-0.5	545.787	56.68	3120000	2220000	P42768|WASP_HUMAN			21.6	0.05	1
LANITMGLPL	11.28	1041.59	10	1.5	348.204	21.83	4230000	1420000	Q9Y4E6|WDR7_HUMAN			5661.6	5	0
LGATFPGPIF	12.65	1018.55	10	-2.4	510.28	54.86	5850000		Q6ZNJ1|NBEL2_HUMAN			9189	8	0
LGIPKDPRQW	21.9	1208.67	10	-0.7	403.896	49.2	1090000	33400000	P14921|ETS1_HUMAN			206	0.5	1
LSALIDGKNF	20.42	1076.59	10	0.9	539.301	53.15	750000	888000	Q9Y277|VDAC3_HUMAN			1519.6	1.7	1
LSENNIQTIF	13.56	1177.6	10	-1.8	589.805	47.61	2270000	1070000	P05556|ITB1_HUMAN			658.3	1	1
LSKPVPESEF	28.01	1131.58	10	2.5	566.799	41.13	1790000		Q04637|IF4G1_HUMAN			634.2	1	1
LSKQETGTEF	52.27	1138.55	10	1.4	570.283	29.7	37200000	46600000	Q15051|IQCB1_HUMAN			2815.3	3	0
LSLDELHRKY	31.43	1272.68	10	-0.7	425.235	38.31	5670000	8210000	P05023|AT1A1_HUMAN			495.6	0.9	1
LSQNGSAPTF	24.05	1020.49	10	0.4	511.251	40.48	8170000	10500000	Q92542|NICA_HUMAN			2875.3	3	0
LSRPDGSASF	43.7	1035.5	10	-1.8	518.756	35.96	16900000	21000000	Q9NQT4|EXOS5_HUMAN			244.9	0.6	1
LSRPTTETQF	32.37	1178.59	10	0	590.304	35.47	7970000	10400000	Q86XZ4|SPAS2_HUMAN			88	0.25	1
LTHLNLKALW	11.5	1207.71	10	0.9	403.577	44.15	214000		Q14160|SCRIB_HUMAN			11.2	0.02	1
LTIKSIGHQW	37.04	1181.66	10	1.5	591.836	44.74	489000	19900000	P00403|COX2_HUMAN			11.6	0.02	1
LTM(+15.99)PDTPRLF	21.36	1205.61	10	0.1	603.813	56.44	4990000	9950000	Q9NQ25|SLAF7_HUMAN	Oxidation (M)	M3:Oxidation (M):1000.00	165.6	0.4	1
NKSFGEESKI	15.68	1137.57	10	-3.7	569.788	20.79	22200		Q99996|AKAP9_HUMAN			1752.5	1.9	1
NSIKELNERW	36.76	1287.66	10	-0.8	430.226	38.96	453000	26800000	Q13813|SPTN1_HUMAN			108.3	0.3	1
PGYIDMVSTF	17.42	1128.52	10	-3.1	565.264	37.81	2400000	2550000	P35453|HXD13_HUMAN			17164.5	17	0
Q(+42.01)ALQLAVFFL	10.6	1190.67	10	-0.9	596.342	44.35	266000		Q5SNV9|CA167_HUMAN	Acetylation (N-term)	Q1:Acetylation (N-term):1000.00	14779	14	0
QAINPKLLQL	21.09	1136.69	10	-0.3	569.353	58.52	3140000	5240000	P17844|DDX5_HUMAN			6255.5	5.5	0
QSKGPRWASW	25.49	1201.6	10	-1.1	601.806	38.96	521000	3330000	Q8WU79|SMAP2_HUMAN			78.8	0.25	1
QSLPDFGISY	12.63	1125.53	10	0.5	563.775	73.84	3690000	7020000	Q86UX7|URP2_HUMAN			998.3	1.3	1
QSNPYMVLDI	10.8	1178.56	10	-3	590.288	54.51	637000		O75116|ROCK2_HUMAN			2683.6	3	0
QTSLVFSRDF	13.06	1198.6	10	0.8	600.307	57.13	272000		P78527|PRKDC_HUMAN			963.8	1.3	1
QTVKDSRTVY	25.64	1195.62	10	0	598.817	21.36	5710000	4230000	P78371|TCPB_HUMAN			3575.1	3.5	0
R(+.98)IGFKQHPKY	16.99	1273.69	10	2	425.572	28.71	3330000		Q12888|TP53B_HUMAN	Citrullination	R1:Citrullination:1000.00	6132.5	5.5	0
RAGPLSGKKF	46.45	1059.62	10	-0.2	354.214	21.11	6220000	6170000	P17844|DDX5_HUMAN			323.9	0.7	1
RAIDSIHQLW	32.66	1237.66	10	-0.2	413.559	51.65	436000	24500000	Q8TEK3|DOT1L_HUMAN			13.9	0.03	1
RALELEARRW	30.6	1298.72	10	-0.9	433.914	34.84	4690000	39000000	Q03169|TNAP2_HUMAN			8.8	0.01	1
RALLEKNRSY	33.94	1248.69	10	-0.7	417.238	20.37	3630000	4860000	O60231|DHX16_HUMAN			584.1	0.9	1
RAYPHNLM(+15.99)TF	41.73	1264.6	10	-1.3	422.541	35.05	15400000	17900000	Q15629|TRAM1_HUMAN	Oxidation (M)	M8:Oxidation (M):1000.00	64.6	0.2	1
RSASSASSLF	32.88	1011.5	10	-0.7	506.756	36.67	4540000	5270000	Q14671|PUM1_HUMAN			177.7	0.5	1
RSFKETTNRW	40.76	1323.67	10	-0.3	442.23	23.3	649000	16300000	Q92613|JADE3_HUMAN			7	0.01	1
RSIKAQLQNF	19.5	1203.67	10	1.2	602.844	36.29	790000	2080000	Q15057|ACAP2_HUMAN			102.4	0.3	1
RSIQADGLVW	14.73	1143.6	10	-0.1	572.809	56.22	633000	11000000	P24534|EF1B_HUMAN			17.2	0.04	1
RSKEGLTERF	39.91	1221.65	10	0.7	408.223	22.56	1120000	585000	Q15046|SYK_HUMAN			534.5	0.9	1
RSKPDKDLLM(+15.99)	26.74	1217.64	10	0.9	406.889	20.33	3830000	4650000	P42695|CNDD3_HUMAN	Oxidation (M)	M10:Oxidation (M):1000.00	1357.4	1.6	1
RSKPPATVHY	22.05	1154.62	10	-1.5	385.88	18.97	236000	743000	Q9NQC8|IFT46_HUMAN			305.1	0.6	1
RSLINSNVGF	37.21	1105.59	10	0.6	553.802	51.7	4480000	2040000	Q9NR30|DDX21_HUMAN			128.8	0.4	1
RSLPDIPAHL	21.33	1117.62	10	-1.6	559.819	48.15	5720000	7560000	O60244|MED14_HUMAN			176.7	0.5	1
RSLPEPLM(+15.99)TY	38.55	1221.61	10	0.9	611.811	47.38	11200000	12100000	A1A4S6|RHG10_HUMAN	Oxidation (M)	M8:Oxidation (M):1000.00	56.3	0.175	1
RSLPEPLMTY	12.78	1205.61	10	0.4	603.813	55.62	1040000	2750000	A1A4S6|RHG10_HUMAN			39.1	0.125	1
RSLPLGARC(+119.00)F	14.7	1237.61	10	-1.3	413.542	35.84	576000	949000	O75380|NDUS6_HUMAN	Cysteinylation	C9:Cysteinylation:1000.00	30.5	0.09	1
RSLSDLFRRY	30.89	1311.7	10	-0.8	438.242	50.1	65000000	135000000	O75410|TACC1_HUMAN			90	0.25	1
RSM(+15.99)VSTIM(+15.99)KF	34.23	1230.61	10	2.1	411.212	29.18	2890000	1440000	Q9NR09|BIRC6_HUMAN	Oxidation (M)	M3:Oxidation (M):1000.00;M8:Oxidation (M):1000.00	792.4	1.1	1
RSRGFGFVTF	12.66	1172.61	10	-0.1	391.877	54.81	7590000	9510000	O43347|MSI1H_HUMAN			52.2	0.175	1
RSRKELLNFY	14.51	1324.73	10	-0.9	442.582	37.36	5890000	12400000	Q9Y3A4|RRP7A_HUMAN			304.8	0.6	1
RSRKLAAVTY	20.25	1163.68	10	0.2	388.9	21.29	27300000	32000000	Q16181|SEPT7_HUMAN			127.2	0.4	1
RSRPEERPTF	20.51	1273.65	10	0.3	425.558	21.39	728000	3330000	P51451|BLK_HUMAN			60	0.175	1
RSSVVTAVKF	18.75	1092.63	10	1.2	547.322	35.75	3230000	3500000	Q86VP6|CAND1_HUMAN			79.5	0.25	1
RSVDVTNTTF	32.78	1138.56	10	0.2	570.288	40.8	10100000	9390000	O14579|COPE_HUMAN			96.5	0.3	1
RSVPHLQKVF	40.23	1209.7	10	2.6	404.241	33.26	3100000	3790000	A6NMY6|AXA2L_HUMAN:P07355|ANXA2_HUMAN			50.2	0.15	1
RSYSESEKQW	46.34	1298.59	10	-0.7	433.87	25.17	428000	38000000	Q96HQ2|C2AIL_HUMAN			8.3	0.01	1
RTAAGLM(+15.99)HTF	15.7	1119.55	10	0.9	374.191	27.2	390000	993000	P49903|SPS1_HUMAN:Q99611|SPS2_HUMAN	Oxidation (M)	M7:Oxidation (M):1000.00	100.3	0.3	1
RTAGHPLTRW	26.86	1193.64	10	-1.2	398.887	21.94	1840000	65600000	P35236|PTN7_HUMAN			15.5	0.03	1
RTFTDHVM(+15.99)LF	12.64	1281.62	10	-2.1	428.212	52.16	6470000	1990000	Q96GQ7|DDX27_HUMAN	Oxidation (M)	M8:Oxidation (M):1000.00	25.4	0.07	1
RTIKIRNISY	19.1	1262.75	10	0.5	421.923	31.65	2300000	755000	Q96CX6|LRC58_HUMAN			207	0.5	1
RTILVDNNTW	41.67	1230.64	10	1.8	616.326	51.33	3550000	31800000	P46977|STT3A_HUMAN			7.3	0.01	1
RTIQTAFRQY	22.8	1282.68	10	2	428.567	33.93	186000	663000	Q5JU85|IQEC2_HUMAN:Q6DN90|IQEC1_HUMAN			182.4	0.5	1
RTM(+15.99)M(+15.99)EDFRKY	26.54	1407.63	10	-0.9	470.216	23.07	4430000	4390000	P55884|EIF3B_HUMAN	Oxidation (M)	M3:Oxidation (M):1000.00;M4:Oxidation (M):1000.00	1473.6	1.7	1
RTQM(+15.99)PDPKTF	25.01	1235.6	10	1.2	412.873	23.85	906000	573000	Q9Y5V0|ZN706_HUMAN	Oxidation (M)	M4:Oxidation (M):1000.00	291.7	0.6	1
RTRLEQVHEW	16.49	1352.69	10	-0.3	451.906	29.27	2100000	26700000	Q9P2E3|ZNFX1_HUMAN			9.2	0.015	1
RTSDDVAKEF	25.14	1166.56	10	-0.2	584.285	30.72	7480000	7510000	Q8NB66|UN13C_HUMAN			564.1	0.9	1
RTSIETNVRF	40.84	1221.65	10	0	408.223	35.94	5670000	2950000	P09086|PO2F2_HUMAN			129.8	0.4	1
RTYSDDHVKF	19.65	1266.6	10	-2.6	423.206	26.84	1920000	4660000	O43592|XPOT_HUMAN			66	0.2	1
RTYTYEKLLW	40.57	1371.72	10	-0.1	458.247	55.21	970000	27200000	P35222|CTNB1_HUMAN			6.6	0.01	1
RVFPDKGYSF	34.54	1214.61	10	-1.3	608.311	44.92	12300000	18200000	P31483|TIA1_HUMAN			102.1	0.3	1
RVFPEKGYSF	36.98	1228.62	10	1.3	615.32	42.66	17100000	25200000	Q01085|TIAR_HUMAN			98.5	0.3	1
RVINEEYKIW	45.81	1348.71	10	-0.3	450.578	48.37	4540000	43200000	Q09028|RBBP4_HUMAN:Q16576|RBBP7_HUMAN			28.7	0.08	1
RVKPLHYISW	36.96	1297.73	10	-0.8	433.583	40.77	16700000	196000000	O43847|NRDC_HUMAN			17.9	0.04	1
RVKSVNLDQW	34.76	1243.67	10	-1	415.563	39.02	5460000	118000000	Q8WU79|SMAP2_HUMAN:Q8IYB5|SMAP1_HUMAN			88.2	0.25	1
SARAAGYDLY	26.4	1085.51	10	0.3	543.764	39.08	5840000	8110000	P33316|DUT_HUMAN			610.2	1	1
SATDAAIRVW	46.23	1088.56	10	-0.2	545.288	51.16	682000	17100000	Q12788|TBL3_HUMAN			89.6	0.25	1
SINSAAELTY	19.13	1067.51	10	0.5	534.764	32.93	6420000	3440000	O60449|LY75_HUMAN			6612.9	6	0
SSLPADVHRY	13.86	1143.57	10	-1	382.196	30.48	93800	111000	Q96KA5|CLP1L_HUMAN			210.3	0.5	1
SSSPEVKGYW	41.69	1138.53	10	0.7	570.272	43.12	4540000	98000000	Q15365|PCBP1_HUMAN:Q15366|PCBP2_HUMAN			40	0.125	1
STAKEIIQHF	41.08	1172.62	10	0.3	587.317	41.78	24300000	29500000	Q9UET6|TRM7_HUMAN			1367.6	1.6	1
STM(+15.99)GKPQRLY	36.64	1195.6	10	-0.1	399.541	20.87	4760000	5330000	P62906|RL10A_HUMAN	Oxidation (M)	M3:Oxidation (M):1000.00	757.6	1.1	1
SVAFSPDGKY	13.58	1069.51	10	1	535.762	36.58	1240000		O60907|TBL1X_HUMAN:Q9BQ87|TBL1Y_HUMAN			3743	3.5	0
T(+42.01)VQEEQIVEL	14.06	1228.62	10	-0.7	615.316	47.92	2020000		P52732|KIF11_HUMAN	Acetylation (N-term)	T1:Acetylation (N-term):1000.00	24974.6	34	0
TAAQITQRKW	43.07	1201.66	10	-0.1	601.836	28.21	327000	66400000	P30485|1B47_HUMAN:P30492|1B54_HUMAN:P30484|1B46_HUMAN:Q29940|1B59_HUMAN:P30464|1B15_HUMAN:P30493|1B55_HUMAN:P30495|1B56_HUMAN:P18465|1B57_HUMAN:Q29718|1B82_HUMAN:P01889|1B07_HUMAN:P30480|1B42_HUMAN:Q95365|1B38_HUMAN:P30475|1B39_HUMAN:Q29836|1B67_HUMAN:P30462|1B14_HUMAN:P30479|1B41_HUMAN:P30483|1B45_HUMAN:P30488|1B50_HUMAN:P30487|1B49_HUMAN:P03989|1B27_HUMAN:Q04826|1B40_HUMAN:P30460|1B08_HUMAN:P30…			46.6	0.15	1
TLPPGPDPLL	17.6	1018.57	10	0.3	510.292	51.94	10700000	4820000	Q14005|IL16_HUMAN			26899.7	40	0
TSKPPGTTEW	48.99	1102.53	10	-0.2	552.272	32.13	237000	37600000	P49915|GUAA_HUMAN			45.4	0.15	1
TSLGYEVQKF	23.59	1170.59	10	0.1	586.303	49.23	1740000	2990000	O15519|CFLAR_HUMAN			421.5	0.8	1
TSSKPDPSQW	51.08	1131.52	10	-1.1	566.766	32.53	3940000	180000000	O75410|TACC1_HUMAN			54.6	0.175	1
TSSSSVRVEW	37.68	1136.55	10	0.2	569.28	42.67	2370000	51500000	Q9NZ45|CISD1_HUMAN			77.4	0.25	1
TTKKDLKDYF	29.29	1257.66	10	1.5	420.228	35.36	4140000	13500000	Q14103|HNRPD_HUMAN			1166.8	1.5	1
TTKPSSLDQF	15.75	1122.56	10	0.1	562.285	38.47	458000	778000	Q92556|ELMO1_HUMAN			1519.2	1.7	1
TTRTSSQVTF	11.11	1126.56	10	-0.1	564.288	46.75	230000		Q5T4S7|UBR4_HUMAN			695.4	1.1	1
TVYTGIDHHW	36.2	1227.57	10	-0.2	614.791	39.63	709000	24900000	Q9NV06|DCA13_HUMAN			111.1	0.3	1
VAAPSWLHRF	32.28	1182.63	10	-1.6	395.217	52.77	194000	6310000	Q00341|VIGLN_HUMAN			175.7	0.4	1
VGTRTCVHTF	13.07	1119.55	10	4	560.784	27.2	880000		Q9GZS3|WDR61_HUMAN			1681.7	1.9	1
VSAIKENFQF	36.53	1181.61	10	1	591.812	54.93	13400000	19500000	Q460N5|PAR14_HUMAN			328.7	0.7	1
VSKRIAQETF	10.8	1177.65	10	0.6	589.83	28.26	425000		Q6NXE6|ARMC6_HUMAN			365.8	0.7	1
VSLAQQISDV	13.29	1058.56	10	-6.4	530.284	30.64	1180000		Q9Y6N7|ROBO1_HUMAN			5826.3	5	0
VSREDGSFSF	13.05	1129.5	10	0	565.759	46.15	780000	1110000	Q5JPE7|NOMO2_HUMAN:Q15155|NOMO1_HUMAN:P69849|NOMO3_HUMAN			691.9	1.1	1
VSSRVTAVSF	17.82	1051.57	10	-0.4	526.79	34.03	3840000	2240000	O60336|MABP1_HUMAN			224.2	0.5	1
VTFPDIIRNY	18.77	1236.65	10	0.4	619.333	67.99	854000	3960000	P42224|STAT1_HUMAN			321.1	0.7	1
VTKDGRVFAW	25.93	1177.62	10	0.2	589.82	42.95	1070000	44700000	P18754|RCC1_HUMAN			296.5	0.6	1
VTKTVSNDSF	58.77	1096.54	10	1.4	549.278	27.67	60200000	78900000	P55209|NP1L1_HUMAN			2613.5	3	0
VTNKSQIRTW	43.25	1231.67	10	-0.4	616.841	25.04	7170000	274000000	P27694|RFA1_HUMAN			47.4	0.15	1
VTQGHGAYLM(+15.99)	11.49	1091.51	10	-0.5	546.76	26.85	90100	101000	Q9UKK3|PARP4_HUMAN	Oxidation (M)	M10:Oxidation (M):1000.00	8042.2	7	0
VTRPDSGHLY	23.46	1143.57	10	-0.7	572.79	29.26	37300000	28600000	Q15418|KS6A1_HUMAN			301.6	0.6	1
VTVPANVQRW	33.12	1168.64	10	0.9	585.325	48	564000	33800000	Q13155|AIMP2_HUMAN			18.9	0.05	1
YVAICHLLHY	11.71	1230.62	10	-0.4	411.214	17.88	1360000		Q8NH06|OR1P1_HUMAN			9439	8	0
AAAAAAAAAAW	40.98	914.461	11	1.8	458.239	46.71	419000	389000	Q96QS3|ARX_HUMAN			922	1.3	1
AAYRNLGQNLW	34.83	1304.66	11	-0.4	653.338	55.46	2490000	29500000	Q9P258|RCC2_HUMAN			58.1	0.175	1
ASKGPEALQEF	15.66	1175.58	11	-1.3	588.798	44.98	2110000	11400000	Q2TAL8|QRIC1_HUMAN			10837.5	9.5	0
ASRVLISTDVW	23.6	1245.67	11	-0.2	623.843	59.88	557000	5190000	P38919|IF4A3_HUMAN			232.3	0.5	1
ASYSGKAADVW	43.12	1153.54	11	-0.4	577.777	40.54	1310000	41500000	Q96RU7|TRIB3_HUMAN			397.8	0.7	1
ATFHQRGIALW	40.89	1298.69	11	-0.2	650.351	49.98	7320000	57100000	P55884|EIF3B_HUMAN			41.5	0.125	1
ATIKDIREHEW	39.32	1396.71	11	-0.2	466.577	36.64	2640000	37500000	P54646|AAPK2_HUMAN			183.6	0.5	1
ATLGNFAKATF	48.2	1139.6	11	1.2	570.807	55.31	6960000	11200000	P15880|RS2_HUMAN			7059.1	6	0
C(+119.00)SKPEQLVVTF	17.16	1368.64	11	-2	685.327	53.6	12700000	16700000	Q00325|MPCP_HUMAN	Cysteinylation	C1:Cysteinylation:1000.00	7738.7	6.5	0
EGPSPAVPSIY	10.82	1115.55	11	-1	558.782	31.64	460000		Q8NHL6|LIRB1_HUMAN			27076.9	40	0
GSSLPADVHRY	34.43	1200.59	11	1.9	401.204	30.71	6340000	4970000	Q96KA5|CLP1L_HUMAN			2193	2.5	0
GTWIGKGTERW	36.25	1289.65	11	0.3	430.891	41.47	2140000	44300000	Q9C0C9|UBE2O_HUMAN			325.5	0.7	1
GTYM(+15.99)GHTGAVW	41.64	1194.51	11	-0.8	598.263	38.28	928000	31100000	Q13347|EIF3I_HUMAN	Oxidation (M)	M4:Oxidation (M):1000.00	23.2	0.06	1
HAAVAVGHRVY	31.62	1178.63	11	3	393.885	21.51	692000	322000	Q9BQ90|KLDC3_HUMAN			7228	6	0
HATIDSKTGDL	13.65	1156.57	11	0.1	579.293	29.57	1880000		Q9Y263|PLAP_HUMAN			20007.9	22	0
HLSM(+15.99)LLDVAVS	12.2	1199.62	11	-1.3	600.817	42.5	7720000		P57081|WDR4_HUMAN	Oxidation (M)	M4:Oxidation (M):1000.00	4820.6	4.5	0
HSAPDSLKAKF	40.97	1199.63	11	-0.6	400.884	26.45	1250000		Q92618|ZN516_HUMAN			1110.5	1.4	1
HTRAASIYSSW	42.85	1277.62	11	-0.1	639.815	37.87	5330000	41500000	Q92538|GBF1_HUMAN			23.9	0.06	1
HTSDVPGKLIY	52.73	1228.65	11	-1.2	615.329	39.05	15800000	13500000	P05107|ITB2_HUMAN			5733.5	5	0
ISAPDKRIYQF	37.25	1336.71	11	-1.3	446.578	46.2	39800000	57200000	O75563|SKAP2_HUMAN			261.1	0.6	1
ISDHEATLRC(+119.00)W	35.41	1448.62	11	0.6	725.317	36.96	1300000	52500000	P30485|1B47_HUMAN:P30492|1B54_HUMAN:P30484|1B46_HUMAN:Q29940|1B59_HUMAN:P30464|1B15_HUMAN:P30493|1B55_HUMAN:P30495|1B56_HUMAN:P18465|1B57_HUMAN:Q29718|1B82_HUMAN:P01889|1B07_HUMAN:P30480|1B42_HUMAN:Q95365|1B38_HUMAN:P30475|1B39_HUMAN:Q29836|1B67_HUMAN:P30462|1B14_HUMAN:P30479|1B41_HUMAN:P30483|1B45_HUMAN:P30488|1B50_HUMAN:P30487|1B49_HUMAN:P03989|1B27_HUMAN:Q04826|1B40_HUMAN:P30460|1B08_HUMAN:P30…	Cysteinylation	C10:Cysteinylation:1000.00	42.9	0.15	1
ISFIEDPERKY	33.59	1395.7	11	1.5	466.242	46.09	15500000	24100000	Q9NW61|PKHJ1_HUMAN			1014.3	1.3	1
ISKKSSDSRQF	16.22	1281.67	11	-0.7	428.23	16.27	319000	138000	Q9NVP1|DDX18_HUMAN			2076.2	2.5	0
ISLPDDVRRRL	12.54	1338.77	11	-0.3	447.265	45.89	3660000	10800000	P26358|DNMT1_HUMAN			1847.7	2	1
ITIPDIKKDRW	36.62	1383.79	11	0.4	462.27	48.56	3500000	101000000	O14757|CHK1_HUMAN			24.7	0.07	1
ITRKIKDSDAY	33	1308.7	11	0.3	437.242	20	2280000	2900000	Q8TCY9|URGCP_HUMAN			11953.2	11	0
ITSSAKVDM(+15.99)TF	55.07	1214.59	11	-1	608.299	36.42	85700000	115000000	Q14318|FKBP8_HUMAN	Oxidation (M)	M9:Oxidation (M):1000.00	149.4	0.4	1
ITSSAKVDMTF	24.45	1198.59	11	0.2	600.303	47.5	2090000	4560000	Q14318|FKBP8_HUMAN			674.2	1	1
ITSSIHSKETF	56.91	1248.63	11	-0.1	625.325	28.47	139000000	160000000	Q07864|DPOE1_HUMAN			1630.9	1.8	1
ITSVQQRLKLY	23.84	1347.79	11	0.9	450.27	43.23	1330000	3200000	P62495|ERF1_HUMAN			1722.1	1.9	1
KAAEAAASAYY	24.94	1114.53	11	-2.3	558.271	33.1	2800000	4230000	Q969T9|WBP2_HUMAN			2111.6	2.5	0
KAAEAHVDAHY	50.95	1210.57	11	-1	404.531	18.98	3560000	4370000	P55263|ADK_HUMAN			5384.7	5	0
KAAEVLNKHSL	17.28	1208.69	11	-2	403.902	21.54	205000	986000	P52272|HNRPM_HUMAN			5802	5	0
KAETEEAAHSV	13.16	1170.55	11	-0.8	391.191	17.26	682000		Q9NUA8|ZBT40_HUMAN			28143.6	44	0
KAFAETHIKGF	51.32	1247.67	11	-1.7	416.895	32.38	8570000	11500000	P42704|LPPRC_HUMAN			185	0.5	1
KAFPHSSSLRY	25.18	1291.67	11	-0.4	431.563	27.71	2310000	1860000	Q8IYI8|ZN440_HUMAN			800.8	1.2	1
KAGQGHVGNIF	10.32	1126.59	11	-3.2	564.3	27.42	264000		Q9ULX5|RN112_HUMAN			7362.3	6.5	0
KAKIAEQVASF	16.35	1190.67	11	-3	596.338	35.44	89500	263000	P35221|CTNA1_HUMAN			3366	3.5	0
KALDAAFYKTF	13.56	1273.67	11	1.2	637.843	51.6	274000	329000	P10155|RO60_HUMAN			499.1	0.9	1
KALTEPEARYY	20.65	1339.68	11	-0.9	447.566	33.41	1840000	350000	P53350|PLK1_HUMAN			785.1	1.1	1
KAM(+15.99)QSLKSRGY	42.11	1283.67	11	0.6	428.896	17.51	2740000	3950000	P46783|RS10_HUMAN	Oxidation (M)	M3:Oxidation (M):1000.00	310.4	0.6	1
KAMQSLKSRGY	37.24	1267.67	11	0.8	423.565	19.04	442000	269000	P46783|RS10_HUMAN			3310.9	3.5	0
KANLEKAKQTL	24.32	1242.73	11	0.2	415.25	19.92	674000	493000	P35579|MYH9_HUMAN			15355.4	15	0
KAPEGSPPPLF	15.48	1138.6	11	-0.2	570.308	38.98	1590000	2050000	Q9H4S2|GSX1_HUMAN			8902.5	7.5	0
KARHSDIVVLY	20.1	1299.73	11	2.5	434.252	33.01	1380000	902000	Q6PCD5|RFWD3_HUMAN			2755.9	3	0
KASELHSVRKL	50.19	1266.74	11	0.1	423.254	18.12	21800000	26200000	O43822|CF410_HUMAN			6570.6	5.5	0
KAVDSQILPKI	32.54	1210.73	11	2.1	404.584	44.33	1890000	3610000	Q02878|RL6_HUMAN			9538.7	8	0
KAVRDALKTEF	11.96	1276.71	11	-0.2	426.579	31.4	2610000		P56381|ATP5E_HUMAN			1755.6	1.9	1
KIADM(+15.99)GHLKYY	44.67	1353.67	11	1.1	452.233	29.13	6550000	6650000	P12004|PCNA_HUMAN	Oxidation (M)	M5:Oxidation (M):1000.00	5319.4	5	0
KITSVHSRIIW	42.86	1338.78	11	1.2	447.267	36.33	1350000	13100000	Q6IA86|ELP2_HUMAN			95.4	0.3	1
KKTLPELYAFT	10.44	1309.73	11	1.7	437.584	41.8	1330000		P47972|NPTX2_HUMAN			723.2	1.1	1
KSDEGHPFRAY	40.98	1305.61	11	-0.3	436.211	22.24	11300000	27200000	Q9NQC3|RTN4_HUMAN			18121.6	19	0
KSFSDTLKTYF	38.97	1335.67	11	1.4	668.844	62.29	12000000	31500000	Q9BUL8|PDC10_HUMAN			105.6	0.3	1
KSFSKSDLVNW	38.48	1309.67	11	2.6	655.842	46.4	1050000	79400000	O43847|NRDC_HUMAN			34	0.1	1
KSIDAGPVDAW	39.19	1157.57	11	-0.3	579.793	49.04	109000	23100000	Q9GZS3|WDR61_HUMAN			139.5	0.4	1
KSIGPPEM(+15.99)HKY	19.95	1301.64	11	-2	434.888	21.09	566000	826000	Q8IY18|SMC5_HUMAN	Oxidation (M)	M8:Oxidation (M):1000.00	248.1	0.6	1
KSKDIVNKM(+15.99)TF	51.97	1325.7	11	-1.3	442.907	22.94	17300000	19800000	P52732|KIF11_HUMAN	Oxidation (M)	M9:Oxidation (M):1000.00	87.1	0.25	1
KSKDIVNKMTF	27.53	1309.71	11	0.6	437.576	30.56	860000	3420000	P52732|KIF11_HUMAN			524	0.9	1
KSKEDLVSQGF	48.97	1236.63	11	-1.1	619.324	35.1	82100000	101000000	Q96FW1|OTUB1_HUMAN			3055.9	3	0
KSKILSKVEKF	36.11	1305.8	11	-1.9	436.274	26.29	1790000	3650000	Q96RS0|TGS1_HUMAN			1670.5	1.9	1
KSKLDAEVSKW	65.06	1289.7	11	1.5	430.907	32.51	13500000	255000000	P35221|CTNA1_HUMAN			63.2	0.2	1
KSKPDKQLIQY	37.63	1346.76	11	0.8	449.926	24.57	27800000	37200000	Q03933|HSF2_HUMAN			1727.9	1.9	1
KSKPGAAMVEM(+15.99)	32.3	1163.57	11	0.5	582.792	19.79	3460000	4840000	P14866|HNRPL_HUMAN	Oxidation (M)	M11:Oxidation (M):101.94	1408.5	1.7	1
KSKPVEKNYAF	54.88	1309.7	11	0.4	437.575	22.38	151000000	177000000	P09884|DPOLA_HUMAN			421.1	0.8	1
KSKPVM(+15.99)IVTEY	18.31	1309.7	11	1.8	655.856	32.62	3850000		P54756|EPHA5_HUMAN:P29320|EPHA3_HUMAN	Oxidation (M)	M6:Oxidation (M):1000.00	80.6	0.25	1
KSKQKEDNHIF	14.23	1372.71	11	0.5	458.577	16.97	1180000	3280000	Q96PZ2|F111A_HUMAN			2071.2	2.5	0
KSKVLNESVSF	38.79	1236.67	11	0.3	619.343	36.83	11200000	12800000	P29728|OAS2_HUMAN			999.1	1.3	1
KSLKISGIKDF	34.47	1234.73	11	-1.5	412.583	37.54	5480000	9190000	P55884|EIF3B_HUMAN			493.1	0.9	1
KSLPEEDVAEI	16.69	1228.62	11	2.7	615.318	46.13	13300000	15200000	O60832|DKC1_HUMAN			3438.8	3.5	0
KSLPEFPDSGF	15.28	1222.59	11	-0.9	612.3	58.93	601000	1290000	Q8IW35|CEP97_HUMAN			1276.9	1.6	1
KSLSDTAKPHI	58.04	1195.66	11	-0.5	399.559	24.46	28800000	31900000	Q13118|KLF10_HUMAN			5451	5	0
KSRDLFVSTSW	14.68	1324.68	11	0.4	442.567	50.54	1150000	9780000	Q9BRQ8|AIFM2_HUMAN			13.6	0.03	1
KSRPEDQRSSF	22.75	1335.65	11	0.4	446.225	17.44	1420000	2180000	Q9UPZ3|HPS5_HUMAN			558.7	0.9	1
KSSKNSSLRTT	11.7	1207.65	11	4.9	403.56	20.98	49100		Q9ULJ7|ANR50_HUMAN			10333.6	9	0
KSSPQIPHQTY	44.84	1284.65	11	-1.1	429.222	26.29	18500000	22800000	Q16659|MK06_HUMAN			743.3	1.1	1
KSSQLISHKRF	39.92	1329.75	11	-1.2	444.257	19.45	781000	983000	P59923|ZN445_HUMAN			374.8	0.7	1
KSVVNLADVIY	12.39	1219.68	11	0.7	407.568	50.55	3620000		O75078|ADA11_HUMAN			1775.7	1.9	1
KSYELPDGQVI	18.28	1247.64	11	1.2	624.828	56.06	1930000	9030000	P60709|ACTB_HUMAN:P68133|ACTS_HUMAN:P68032|ACTC_HUMAN:P0CG39|POTEJ_HUMAN:Q6S8J3|POTEE_HUMAN:A5A3E0|POTEF_HUMAN:P0CG38|POTEI_HUMAN			3313.1	3.5	0
KSYPGSQSQLF	44.55	1240.61	11	-0.2	621.312	43.98	18300000	22400000	A2RUB6|CCD66_HUMAN			298.7	0.6	1
KTATITTR(+.98)TSS	10.3	1166.61	11	-1.6	584.313	25.83	2390000		Q5T4S7|UBR4_HUMAN	Citrullination	R8:Citrullination:1000.00	5430.9	5	0
KTIQTIALITY	14.41	1263.74	11	0.1	632.879	61.92	373000	1080000	P51532|SMCA4_HUMAN:P51531|SMCA2_HUMAN			1497.5	1.7	1
KTKDHTLVQTI	31.11	1282.72	11	-2.1	428.581	25.06	17600000	20800000	Q14684|RRP1B_HUMAN			12699.8	12	0
KTKGGSKYLIY	12.86	1256.71	11	-0.6	419.911	26.62	1280000	1140000	Q15080|NCF4_HUMAN			7066.6	6	0
KTKGKRFTYKF	14.46	1402.81	11	-1.6	468.609	20.56	545000	190000	Q6ZN32|ETV3L_HUMAN:P41162|ETV3_HUMAN			303.1	0.6	1
KTKPEVLEAHY	51.65	1313.7	11	-1	438.906	26.31	5970000	5530000	Q7Z7B0|FLIP1_HUMAN			2251.7	2.5	0
KTKTLDPKAVF	15.34	1246.73	11	-0.6	416.583	33.64	989000	3960000	Q9HCE5|MET14_HUMAN			2950.7	3	0
KTLGTDGLFLF	12.12	1210.66	11	-0.4	606.337	46.96	1460000		Q9NZV5|SELN_HUMAN			127.1	0.4	1
KTLKGHSNYVF	14.21	1292.69	11	-0.1	431.903	24.75	1160000	446000	P61964|WDR5_HUMAN:Q86VZ2|WDR5B_HUMAN			192.7	0.5	1
KTLNRIQSKLY	20.01	1362.8	11	0.9	455.274	27.16	2460000	4980000	O75643|U520_HUMAN			931	1.3	1
KTLPADVQNYY	51.21	1310.65	11	1.2	656.333	47.01	53900000	68400000	Q99590|SCAFB_HUMAN			156.6	0.4	1
KTLPETSLPNY	46.25	1261.66	11	1	631.836	46.61	54700000	65900000	Q9BYI3|HYCCI_HUMAN			916.5	1.3	1
KTLVNPANVTF	50.21	1202.67	11	-1	602.34	53.74	131000000	170000000	O75608|LYPA1_HUMAN			175.9	0.4	1
KTMSAKEKGKF	13.02	1253.68	11	0.9	418.901	15.28	101000		P09429|HMGB1_HUMAN:B2RPK0|HGB1A_HUMAN			1572.4	1.8	1
KTRDSSPKVRF	36.93	1319.73	11	0.4	440.918	18.31	625000	0	Q9H583|HEAT1_HUMAN			1721.9	1.9	1
KTRENHLVSTF	21.11	1330.7	11	-0.3	444.574	25.43	10600000	12600000	P41247|PLPL4_HUMAN			1256.6	1.6	1
KTRGDHFKLRF	37.32	1403.78	11	-0.4	468.933	24.27	15200000	27400000	O43257|ZNHI1_HUMAN			592.5	1	1
KTRIISDGLKY	38.53	1292.75	11	-0.8	431.922	30.34	8960000	11900000	P30876|RPB2_HUMAN			2553.5	2.5	0
KTRLDNGVTGF	23.17	1206.64	11	1	403.219	34.91	13500000	5860000	Q7KZ85|SPT6H_HUMAN			3574.9	3.5	0
KTRLEQEIATY	15.18	1350.71	11	0.4	451.246	41.23	785000	260000	P35900|K1C20_HUMAN:P19012|K1C15_HUMAN:P02533|K1C14_HUMAN:P08779|K1C16_HUMAN			2120.3	2.5	0
KTSQVPVKHVY	17.02	1284.72	11	1.7	429.248	20.09	99500		Q9NXV2|KCTD5_HUMAN			354	0.7	1
KTVDGPSGKLW	53.69	1186.63	11	-0.2	594.324	35.84	262000	69900000	P04406|G3P_HUMAN			21.4	0.05	1
KTVSSTKLVSF	42.12	1195.68	11	0.5	598.848	35.89	7200000	8930000	P11717|MPRI_HUMAN			843.1	1.2	1
KTVYTGIDHHW	52.34	1355.66	11	-1.4	452.894	31.83	682000	15700000	Q9NV06|DCA13_HUMAN			23	0.06	1
KTYNEPGSQVF	41.23	1268.6	11	0.6	635.309	39.25	63400000	80000000	Q86U86|PB1_HUMAN			1136.8	1.5	1
KVAIKVGGRYL	28.18	1202.75	11	-1.7	401.923	33.72	5660000	7480000	Q16658|FSCN1_HUMAN			12569.3	11	0
KVDEVKSTIKF	68.94	1292.73	11	-0.9	431.918	33.23	125000000	139000000	P62906|RL10A_HUMAN			18348.3	19	0
KVIHEQVNHRW	47.74	1444.77	11	-1	482.596	19.83	5990000	106000000	P11388|TOP2A_HUMAN			81.8	0.25	1
KVKDEKIRQAF	27.53	1360.78	11	1.2	454.602	21.35	1270000	1650000	Q9NTJ3|SMC4_HUMAN			22806.8	28	0
KVRESERAFTY	18.27	1384.71	11	-0.2	462.577	25.3	7920000	12200000	Q9BYT1|S17A9_HUMAN			10490	9	0
LAR(+.98)R(+.98)AIYQATY	11.18	1326.69	11	0.6	664.354	48.32	9400000	12100000	P28074|PSB5_HUMAN	Citrullination	R3:Citrullination:1000.00;R4:Citrullination:1000.00	5418.1	5	0
LGITAGAHRLW	36.2	1193.67	11	0.7	597.841	49.07	321000	12700000	O00767|ACOD_HUMAN			53.4	0.175	1
LSDHEATLRC(+119.00)W	35.41	1448.62	11	0.6	725.317	36.96	1300000	52500000	P10321|1C07_HUMAN	Cysteinylation	C10:Cysteinylation:1000.00	42.9	0.15	1
LSKRNPRQINW	28.65	1410.78	11	-1.1	471.268	25.65	514000	18300000	P83731|RL24_HUMAN			86.7	0.25	1
LSKSSTVLHTF	24.56	1218.66	11	2.1	407.228	35.26	6010000	8650000	Q9Y4C1|KDM3A_HUMAN			406.8	0.8	1
LTLRSEGFDTY	28.4	1300.63	11	0.2	651.322	52.87	2040000	5040000	P12004|PCNA_HUMAN			4351	4	0
P(+42.01)AAPGLIGNVM(+15.99)	17.57	1096.56	11	0.1	549.287	24.61	13000000	17800000	Q8IYB5|SMAP1_HUMAN	Acetylation (N-term); Oxidation (M)	P1:Acetylation (N-term):1000.00;M11:Oxidation (M):1000.00	16724	17	0
P(+42.01)SRPTPSDMAI	11.81	1212.58	11	-0.1	607.298	38.64	528000		O60488|ACSL4_HUMAN	Acetylation (N-term)	P1:Acetylation (N-term):1000.00	22393.3	27	0
PTWLAPNLITF	13.18	1271.69	11	-1.7	636.852	65.99	824000	0	Q9C0D9|EPT1_HUMAN			9299.9	8	0
QALRDNSTM(+15.99)GY	21.86	1270.56	11	-1	636.287	28.45	5260000	7130000	P08238|HS90B_HUMAN:P07900|HS90A_HUMAN:Q58FF7|H90B3_HUMAN	Oxidation (M)	M9:Oxidation (M):1000.00	2434.6	2.5	0
QSSRSHAIFTI	18.26	1245.65	11	-0.7	416.223	39.2	1220000	2570000	O75037|KI21B_HUMAN:Q7Z4S6|KI21A_HUMAN:O95239|KIF4A_HUMAN:Q2VIQ3|KIF4B_HUMAN			5573.2	5	0
QTDPSGTYHAW	43.68	1261.54	11	0.1	631.775	39.81	517000	29300000	Q8TAA3|PSMA8_HUMAN:O14818|PSA7_HUMAN			974.9	1.3	1
RAAAVKATQTL	12.26	1128.66	11	-0.9	565.337	20.72	328000	832000	Q6PJG2|EMSA1_HUMAN			6284.4	5.5	0
RAAGALSKRYW	41.36	1277.7	11	-0.9	426.907	28.42	2540000	34800000	Q9H497|TOR3A_HUMAN			39.5	0.125	1
RAASFQAERKF	17.41	1309.69	11	-0.1	437.57	24.57	113000	38900	O94953|KDM4B_HUMAN			201.1	0.5	1
RADPKKALHHF	50.55	1318.73	11	-0.8	330.688	18.44	17800000	21800000	O95602|RPA1_HUMAN			2074.1	2.5	0
RAKPEYISKTY	58.32	1354.72	11	-1.5	452.581	23.26	16800000	22800000	Q13823|NOG2_HUMAN			2433.6	2.5	0
RARLEESRRLW	26.8	1470.82	11	0.4	368.712	28.29	7800000	80600000	Q01082|SPTB2_HUMAN:O15020|SPTN2_HUMAN			32	0.1	1
RASITPGTILI	12.53	1140.69	11	0.4	571.351	57.45	787000		Q02878|RL6_HUMAN			6259.9	5.5	0
RASTLLSKVFL	14.59	1233.74	11	0.4	617.88	58.33	837000	2750000	Q92538|GBF1_HUMAN			3248.2	3	0
RM(+15.99)LDPSIKGTF	45.83	1279.66	11	-1.1	427.56	39.28	20100000	21400000	Q9NZL9|MAT2B_HUMAN	Oxidation (M)	M2:Oxidation (M):1000.00	2196.1	2.5	0
RSAVEKSM(+15.99)NTF	30.98	1284.61	11	-0.1	429.212	21.1	3320000	3870000	Q9Y2G3|AT11B_HUMAN	Oxidation (M)	M8:Oxidation (M):1000.00	108.9	0.3	1
RSKKGGEFDEF	15.73	1298.63	11	0.2	433.882	25.41	508000		Q6PD62|CTR9_HUMAN			9205.6	8	0
RSLDHPNVLKF	20.18	1324.73	11	-0.1	442.582	38.68	1690000	3360000	P53671|LIMK2_HUMAN			277	0.6	1
RSQHEKAALYF	28.03	1348.69	11	-0.1	450.57	27.74	1490000	2200000	Q9UJX2|CDC23_HUMAN			1454	1.7	1
RSSKFAGTRFL	25.95	1268.7	11	-1.1	423.906	30.15	3570000	4180000	Q92562|FIG4_HUMAN			957	1.3	1
RSSQAKAINTL	15.2	1187.66	11	1.2	396.895	22.25	117000		Q92805|GOGA1_HUMAN			3367.3	3.5	0
RSTNKGTAYTF	46.73	1244.62	11	-0.4	415.879	24.2	46600000	54700000	Q92841|DDX17_HUMAN			447.9	0.8	1
RSVSDNDIRKY	31.87	1351.68	11	-0.7	451.568	23.52	304000	633000	P55072|TERA_HUMAN			1906	2	1
RSYVTTSTRTY	45.31	1333.66	11	-0.2	445.561	26.03	11400000	13400000	P08670|VIME_HUMAN			1083.4	1.4	1
RTAGHPLTRWA	19.31	1264.68	11	-0.4	422.567	24.06	3690000	4170000	P35236|PTN7_HUMAN			83.8	0.25	1
RTATQLAVNKI	18.48	1213.71	11	-0.8	607.864	31.47	1240000	1420000	Q99832|TCPH_HUMAN			10351.2	9	0
RTFSSLHVERW	24.34	1416.73	11	0.6	473.25	39.48	750000	6790000	Q9Y673|ALG5_HUMAN			9.5	0.015	1
RTIQTPIGSTW	37.21	1258.67	11	-1.8	630.34	52.64	406000	20500000	Q9BVJ6|UT14A_HUMAN:Q5TAP6|UT14C_HUMAN			18	0.04	1
RTKAATIIQKY	24.34	1291.76	11	1.4	431.595	23.39	528000	637000	Q9Y4I1|MYO5A_HUMAN			1843.5	2	1
RTKDLIIEQRF	33.49	1417.8	11	-0.6	473.608	37.91	47300000	63200000	Q00341|VIGLN_HUMAN			353.9	0.7	1
RTKKVGIVGKY	59.36	1247.77	11	-1.3	416.93	19.29	38900000	54400000	P61513|RL37A_HUMAN			5073.8	4.5	0
RTKLQNKEHVI	32.33	1364.79	11	-0.3	455.937	17.82	4330000	5950000	P27635|RL10_HUMAN			10638.4	9	0
RTKSTGGAPTF	35.43	1121.58	11	-1.2	374.868	22.01	22500000	26900000	P07737|PROF1_HUMAN			4018	4	0
RTLEDRGIRKI	38.47	1355.8	11	0.7	339.957	21.69	30300000	42400000	Q9Y2X3|NOP58_HUMAN			5507.2	5	0
RTLEPLAKKIF	50.58	1314.8	11	-0.4	439.274	40.66	4240000	9560000	A8MTT3|CEBOS_HUMAN			447.7	0.8	1
RTLKSGDGITF	41.14	1193.64	11	-1.8	398.887	35.93	18600000	21900000	O60934|NBN_HUMAN			1069.1	1.4	1
RTLPHFIKDDY	29.78	1403.72	11	-1.6	468.913	38.3	457000	594000	P24928|RPB1_HUMAN			4195.1	4	0
RTLPVDSSHGF	50.01	1214.6	11	0.2	608.31	36.14	11400000	12500000	Q6P4F7|RHGBA_HUMAN			159.8	0.4	1
RTLVEHSGRVF	36.27	1299.7	11	1	434.243	27.61	3250000	1560000	Q9UKB1|FBW1B_HUMAN:Q9Y297|FBW1A_HUMAN			563.1	0.9	1
RTNPNSGDFRF	37.07	1309.62	11	0.9	437.546	35.32	12700000	19700000	Q9NVW2|RNF12_HUMAN			709.4	1.1	1
RTREPALDGGF	20.43	1217.62	11	-1.9	406.878	34.26	6640000	4700000	Q9Y6B2|EID1_HUMAN			3370.9	3.5	0
RTRLEKEGIVF	17.4	1346.77	11	-1	449.929	35.6	4100000	12200000	Q9UKK3|PARP4_HUMAN			2774.1	3	0
RTRPAANPIQF	23.99	1269.69	11	-0.9	424.238	35.54	80000000	136000000	P23921|RIR1_HUMAN			333.7	0.7	1
RTSPDTLRRVF	15.52	1346.74	11	-0.4	449.921	32.95	3190000	4020000	Q01130|SRSF2_HUMAN			461.9	0.8	1
RTSVETALRAY	40.78	1265.67	11	1	422.899	38.22	6070000	9570000	P47755|CAZA2_HUMAN			1741.9	1.9	1
RTSVKKGHIQF	23.17	1299.74	11	-0.2	434.254	18.82	976000	1120000	Q96L73|NSD1_HUMAN			2288.6	2.5	0
RTTVVHGDFRL	25.38	1299.7	11	-1	434.242	34.37	11600000	12900000	Q6JQN1|ACD10_HUMAN			4321.7	4	0
RVDPNGSRYLL	51.04	1288.69	11	0	430.57	39.01	14400000	40600000	Q16531|DDB1_HUMAN			18672.2	20	0
RVFEDESGKHW	51.94	1388.65	11	-0.1	463.89	28.8	3250000	48400000	Q8TEA8|DTD1_HUMAN			80.1	0.25	1
RVLDFDVKRKY	11.29	1437.81	11	0.3	480.277	33.85	273000		Q7Z6Z7|HUWE1_HUMAN			15006.5	14	0
RVLPPSHRVTW	52.05	1346.76	11	-1.2	449.926	30.02	141000	71400000	P15498|VAV_HUMAN			43.3	0.15	1
RVLPYPFTHHW	33.84	1451.75	11	0.9	484.923	49.2	304000	9850000	Q9BVJ6|UT14A_HUMAN			36.2	0.125	1
RVYPESIPRKF	45.95	1390.77	11	-0.9	464.598	35.08	30700000	42600000	Q6NSI4|RADX_HUMAN			3359.8	3.5	0
SASPDATIRIW	41.27	1215.62	11	1.7	608.821	57.65	5290000	53000000	Q9UMS4|PRP19_HUMAN			133.3	0.4	1
SSATDAAIRVW	50.11	1175.59	11	1.1	588.805	51.95	6490000	91500000	Q12788|TBL3_HUMAN			109.7	0.3	1
SSQGRPSSM(+15.99)YF	25.02	1261.54	11	0.6	631.778	34.4	3220000	3490000	Q92900|RENT1_HUMAN	Oxidation (M)	M9:Oxidation (M):1000.00	487.8	0.8	1
SSSKLKNGLTF	40.15	1180.65	11	-0.3	591.33	31.94	20600000	23100000	Q6ZSZ5|ARHGI_HUMAN			3684.1	3.5	0
SSSNTKAVTTF	43.59	1141.56	11	2	571.789	28.62	7130000	8230000	P04198|MYCN_HUMAN			3637.9	3.5	0
SVSKDHALRLW	48.66	1310.71	11	-1	437.91	38.25	2060000	38300000	O75530|EED_HUMAN			214.7	0.5	1
TIENESVKIAF	10.68	1249.66	11	0.4	625.835	46.29	2410000		Q6IA86|ELP2_HUMAN			33367.1	70	0
TTIPTKQTQTF	37.29	1264.67	11	-0.9	633.34	34.94	13900000	18300000	P11142|HSP7C_HUMAN:P54652|HSP72_HUMAN			2737.6	3	0
V(+42.01)DGKQVELALW	17.26	1298.69	11	0.2	433.903	50.12	4550000		P61586|RHOA_HUMAN:P08134|RHOC_HUMAN:P62745|RHOB_HUMAN	Acetylation (N-term)	V1:Acetylation (N-term):1000.00	307.7	0.6	1
VASKEIGKRKL	45.59	1227.77	11	-0.7	410.262	17.75	14700000	17000000	O60293|ZC3H1_HUMAN			17867	18	0
VGLPAAGKTTW	48.05	1099.6	11	-0.1	550.808	48.51	8110000	202000000	Q9BUJ2|HNRL1_HUMAN			325.7	0.7	1
VSLPSHLNISY	20.32	1228.65	11	-0.4	615.33	60.31	5210000	11300000	Q96E22|NGBR_HUMAN			2795.9	3	0
VTANNDKNRTF	26.13	1278.63	11	0.4	427.218	19.47	394000	769000	P21333|FLNA_HUMAN			8538.8	7.5	0
VTKPNNIKSM(+15.99)F	48.23	1293.67	11	0	432.232	29.98	33800000	37900000	P09884|DPOLA_HUMAN	Oxidation (M)	M10:Oxidation (M):1000.00	238.8	0.6	1
VTKSVKVFAEY	17.31	1269.7	11	1	635.856	37.01	374000		Q9H583|HEAT1_HUMAN			9257.7	8	0
VTYPAKAKGTF	35.72	1181.64	11	0.3	394.889	28.37	3160000	3900000	P04844|RPN2_HUMAN			1425.4	1.7	1
WTSRQVGERTL	31.37	1331.69	11	-0.6	444.905	30.9	1450000	5160000	P61158|ARP3_HUMAN:Q9P1U1|ARP3B_HUMAN:Q9C0K3|ARP3C_HUMAN			9392.3	8	0
Y(+42.01)AIPARGRSAF	17.32	1249.66	11	-0.3	625.835	47.03	1090000		Q86UK7|ZN598_HUMAN	Acetylation (N-term)	Y1:Acetylation (N-term):1000.00	13274	12	0
ASFQEEKSKLDA	12.27	1351.66	12	-1	451.561	31.98	790000		P35221|CTNA1_HUMAN			20756.3	23	0
CLFPLPEPQDLF	10.25	1417.7	12	1.3	709.856	46.89	528000		Q9NZ56|FMN2_HUMAN			22653.8	28	0
DGSSLPADVHRY	47.6	1315.62	12	-1	439.545	34.96	13200000	15800000	Q96KA5|CLP1L_HUMAN			3113.3	3	0
E(+42.01)TSLKRPKRPLF	11.01	1512.88	12	0.6	757.447	29.36	95700		Q96RW7|HMCN1_HUMAN	Acetylation (N-term)	E1:Acetylation (N-term):1000.00	5394.8	5	0
GSTPLDVAASSV	10.68	1102.55	12	2.1	552.284	33.32	324000		Q15413|RYR3_HUMAN			22525.3	27	0
HSIQYSGEVRRF	28.83	1477.74	12	0	493.588	31.93	19700000	25500000	P04040|CATA_HUMAN			1503.6	1.7	1
KAAGKGKLDVQF	29.98	1260.72	12	-0.5	421.247	26.92	3680000	6290000	P21333|FLNA_HUMAN			2721.5	3	0
KALQHERLVRLY	30.69	1524.89	12	0.2	382.23	29.7	4310000	9950000	P51451|BLK_HUMAN			763.8	1.1	1
KAYSDQEHIKLW	46.58	1516.77	12	1.2	506.597	41.73	197000	15900000	O14647|CHD2_HUMAN			17.2	0.04	1
KLADPDEVARRW	31.15	1454.76	12	-0.9	485.928	38.38	2140000	59800000	P15036|ETS2_HUMAN			569.1	0.9	1
KLYEEGSNKRLF	39.36	1482.78	12	0	495.268	33.22	3260000	5130000	P25788|PSA3_HUMAN			14864.3	14	0
KSEFLATKAKQF	14.11	1396.77	12	1.7	466.599	29.8	183000		Q8IXQ6|PARP9_HUMAN			2133.4	2.5	0
KSFGDPAKPRAW	44.94	1358.71	12	-0.5	453.91	29.18	731000	26600000	Q9Y4C8|RBM19_HUMAN			15.4	0.03	1
KSIDGKDAVHSF	29.3	1302.66	12	0.1	435.226	27.21	996000	1990000	Q8NEL9|DDHD1_HUMAN			1300	1.6	1
KSKITHPVYSLY	37.03	1434.79	12	0.7	479.27	33.84	3580000	4350000	Q9UGP8|SEC63_HUMAN			1856.9	2	1
KSLGVDSQIKKY	52.83	1364.77	12	-1.2	455.929	26.97	817000	1120000	Q9Y263|PLAP_HUMAN			413.4	0.8	1
KSLQEKVSKKEF	34.08	1449.82	12	-1	484.28	20.49	3240000	2830000	Q15036|SNX17_HUMAN			970.9	1.3	1
KSRGYVKEQFAW	38	1497.77	12	-0.1	500.265	36.3	6690000	41200000	P46783|RS10_HUMAN			26.4	0.07	1
KTEVM(+15.99)VMEGVTT	16.25	1339.64	12	-1.2	447.552	34.38	262000	629000	Q9UG01|IF172_HUMAN	Oxidation (M)	M5:Oxidation (M):0.00	2856	3	0
KTEVMVM(+15.99)EGVTT	10.82	1339.64	12	-1.2	447.552	34.38	262000		Q9UG01|IF172_HUMAN	Oxidation (M)	M7:Oxidation (M):0.00	4509.3	4	0
KTISESDLNHSF	42.1	1376.66	12	2.3	459.894	38.57	5760000	7990000	Q9Y385|UB2J1_HUMAN			410.2	0.8	1
KTLDQAKAVLKF	42.95	1360.81	12	0.4	454.61	42.19	7070000	11500000	Q9H0A0|NAT10_HUMAN			580.9	0.9	1
KTLPAKAKIQDM(+15.99)	30.67	1358.76	12	-0.7	453.927	18.64	1730000	2320000	Q5T4S7|UBR4_HUMAN	Oxidation (M)	M12:Oxidation (M):1000.00	1011.9	1.3	1
KTLQHDKLVRLY	54.69	1512.88	12	0.9	379.227	29.36	59500000	80500000	P07948|LYN_HUMAN			654.9	1	1
KTYEVSLREKEF	34.34	1527.79	12	-1.8	510.271	37.29	2630000	4500000	Q16531|DDB1_HUMAN			541.9	0.9	1
KVIEIQSKHWSC	14.72	1456.75	12	3.6	486.592	21.74	1430000		Q9UQL6|HDAC5_HUMAN			579.5	0.9	1
M(+15.99)SFVPIPGTKKF	22.09	1366.73	12	-1.9	456.584	48.83	7520000	11200000	Q9Y2J8|PADI2_HUMAN	Oxidation (M)	M1:Oxidation (M):1000.00	2983.6	3	0
RSKDDPGKGSYW	45.53	1394.66	12	-0.6	465.893	23.77	1600000	43900000	Q9UPW0|FOXJ3_HUMAN			154.8	0.4	1
RSLRLQKQFAGY	18.68	1465.82	12	-0.3	489.612	33.95	486000	1560000	Q12788|TBL3_HUMAN			151	0.4	1
RSRKESYSVYVY	11.2	1535.77	12	-0.5	512.931	31.1	8070000	5170000	O60814|H2B1K_HUMAN:Q99880|H2B1L_HUMAN			565	0.9	1
RSYKEQESKKGF	18.66	1485.76	12	-1.3	372.446	16.7	694000	608000	P30876|RPB2_HUMAN			455.3	0.8	1
RSYPDEEGPKHW	46.26	1499.68	12	0.4	500.901	28.36	1330000	25100000	Q8NBJ5|GT251_HUMAN			15.7	0.04	1
RTLPHGAGHLAF	35.26	1275.68	12	-0.8	426.235	33.63	2530000	4070000	O15213|WDR46_HUMAN			992.6	1.3	1
RTVPPAVTGITF	15.87	1257.71	12	0.5	629.862	58.64	1050000	2290000	P04075|ALDOA_HUMAN			530.6	0.9	1
S(+42.01)SKSVTEIHLYF	10.33	1451.73	12	2.6	484.918	33.45	2150000		Q96MN2|NALP4_HUMAN	Acetylation (N-term)	S1:Acetylation (N-term):1000.00	917.2	1.3	1
SSATDAAIRVWS	20.23	1262.63	12	-2.4	632.318	49.16	240000	0	Q12788|TBL3_HUMAN			251.7	0.6	1
VGLPAAGKTTWA	16.6	1170.64	12	-0.6	586.327	50.22	6340000	12900000	Q9BUJ2|HNRL1_HUMAN			870	1.2	1
VSDSGAHVLNSW	52.54	1270.59	12	0.2	636.304	47.6	918000	38700000	Q9NVM9|INT13_HUMAN			91.1	0.25	1
VSSSHDKSLRLW	42.86	1413.74	12	-0.5	472.252	34.87	248000	24300000	Q9UNX4|WDR3_HUMAN			68.5	0.2	1
FDGSSLPADVHRY	24.49	1462.68	13	2.3	488.57	44.17	2490000	1230000	Q96KA5|CLP1L_HUMAN			3428.3	3.5	0
KSKDGKLVPM(+15.99)TVF	27.22	1464.8	13	-1.2	489.274	35.96	11300000	15700000	Q4J6C6|PPCEL_HUMAN	Oxidation (M)	M10:Oxidation (M):1000.00	2907.3	3	0
KSLPLPNDKTLLY	34.09	1500.86	13	0.8	501.293	52.88	5530000	10000000	Q969X6|UTP4_HUMAN			213.3	0.5	1
KVKDGPGGKEATW	52.74	1371.71	13	0.4	458.246	20.48	896000	50200000	P22307|NLTP_HUMAN			1170.5	1.5	1
RSIPVNEKDTLTY	36.99	1534.8	13	-0.9	512.606	39.87	2700000	2850000	O75446|SAP30_HUMAN			486.2	0.8	1
RSKDDPGKGSYWA	12.84	1465.69	13	-1.5	489.572	26.88	1410000	1370000	Q9UPW0|FOXJ3_HUMAN			369.1	0.7	1
SSTATSLPPTSSL	16.72	1247.62	13	0.2	624.82	49.35	4970000		Q02505|MUC3A_HUMAN			11207	10	0
TLAAGSISMAEVM	11.29	1279.62	13	3.4	640.817	53.95	497000		Q86VP3|PACS2_HUMAN			13137.3	12	0
GSGPGPGPAGLPAF	11.1	1180.59	14	0.1	591.301	54.21	1780000		O60548|FOXD2_HUMAN			19926.3	22	0
KSYGEDGTAAKHLF	68.12	1522.74	14	2.5	508.589	33	9850000	11200000	Q9NU22|MDN1_HUMAN			76.1	0.25	1
VFDGSSLPADVHRY	16.16	1561.75	14	-1.9	521.591	48.53	705000	946000	Q96KA5|CLP1L_HUMAN			3593	3.5	0
KTLPAHSDPVSAVHF	53.81	1604.83	15	-0.5	535.951	39.28	9840000	14500000	P61964|WDR5_HUMAN			218.2	0.5	1
RSFGIEDKDKQIITF	23.3	1795.95	15	0.5	599.657	51.87	612000		Q92878|RAD50_HUMAN			119.2	0.3	1
GSHSM(+15.99)RYFYTAM(+15.99)SRPG	16.7	1878.81	16	1.3	470.711	28.9	125000	0	P30485|1B47_HUMAN:P30492|1B54_HUMAN:P30484|1B46_HUMAN:Q29940|1B59_HUMAN:P30464|1B15_HUMAN:P30493|1B55_HUMAN:P30495|1B56_HUMAN:P18465|1B57_HUMAN:Q29718|1B82_HUMAN:P30481|1B44_HUMAN:P18464|1B51_HUMAN:P30490|1B52_HUMAN:P30498|1B78_HUMAN:P30491|1B53_HUMAN:P10319|1B58_HUMAN:P30461|1B13_HUMAN	Oxidation (M)	M5:Oxidation (M):1000.00;M12:Oxidation (M):1000.00	1224.1	1.5	1

## Sheet: Table S2B-FLX
Table S2B - Curated peptide list from the immunopeptidome of B721-5701 cells treated with 150 μg/ml FLX (combined data from duplicate samples)
FLUCLOXACILLIN												HLA-B*57:01
Peptide	-10lgP	Mass	Length	ppm	m/z	RT	Area Medium	Area FLX	Accession	PTM	AScore	nM	%Rank	N_binders
A(+42.01)R(+.98)LIQTTW	10.41	1030.54	8	-0.3	516.279	47.03		3840000	Q8IZT6|ASPM_HUMAN	Acetylation (N-term); Citrullination	A1:Acetylation (N-term):1000.00;R2:Citrullination:1000.00	211.3	0.5	1
ASRPPVTL	27.12	839.486	8	0.7	420.751	33.23	2730000	2460000	Q15365|PCBP1_HUMAN:Q15366|PCBP2_HUMAN			13989.4	13	0
ASRPSRGW	10.43	915.467	8	-0.9	306.163	19.27		290000	Q96JP5|ZFP91_HUMAN			329	0.7	1
ATKRAQAW	21.28	930.504	8	-1.5	466.258	17.73		740000	P51149|RAB7A_HUMAN			357.7	0.7	1
ATLELR(+.98)LW	13.07	1001.55	8	-0.4	501.784	56.68		1060000	Q5IJ48|CRUM2_HUMAN	Citrullination	R6:Citrullination:1000.00	17.6	0.04	1
C(+119.00)TRSVYSW	13.39	1119.45	8	0.3	560.731	39.06		4620000	O15371|EIF3D_HUMAN	Cysteinylation	C1:Cysteinylation:1000.00	454.8	0.8	1
D(+42.01)LQRNYIF	17.57	1109.55	8	0.5	555.783	51.55	2390000	7120000	Q86YC3|LRC33_HUMAN	Acetylation (N-term)	D1:Acetylation (N-term):1000.00	15317.4	15	0
GSKFPVRW	23.83	975.529	8	1.3	488.772	39.85		11100000	Q06187|BTK_HUMAN			527.6	0.9	1
GTKYPVEW	16.64	978.481	8	-1.8	490.247	47.14		969000	Q96GY0|ZC21A_HUMAN			2545.7	2.5	0
GTTKPVNW	18.6	901.466	8	0.6	451.74	30.92		635000	Q9NV96|CC50A_HUMAN			2104.2	2.5	0
HLFTFIQF	10.38	1051.55	8	1.8	526.783	52.94		238000	P10155|RO60_HUMAN			15480.8	15	0
HSNKPALW	39.43	951.493	8	-1.5	476.753	27.65		4220000	Q9NYH9|UTP6_HUMAN			85	0.25	1
HTTQSAQW	13.19	957.43	8	-1	479.722	22.86		104000	O94776|MTA2_HUMAN			127.3	0.4	1
IAKIPNFW	35.17	987.554	8	-0.1	494.784	65	1050000	12400000	Q01105|SET_HUMAN			297.2	0.6	1
IAPTGHSL	21.93	794.429	8	0.4	398.222	27.16	31000000	35200000	Q9NVA2|SEP11_HUMAN:Q14141|SEPT6_HUMAN			14435.9	14	0
ISKPPPGF	27.61	841.47	8	0.7	421.742	34.2	10600000	13100000	Q86UK7|ZN598_HUMAN			6751.7	6	0
ISNSPRVI	32.14	884.508	8	-1.7	443.26	30.46	3830000	2990000	P19387|RPB3_HUMAN			14778.7	14	0
ISPTGHSL	13.42	810.424	8	0	406.219	27.11		452000	Q9P0V9|SEP10_HUMAN:Q9UH03|SEPT3_HUMAN:Q6ZU15|SEP14_HUMAN			8621.7	7.5	0
ISRTAVVM(+15.99)	22.49	891.485	8	0.6	446.75	23.19	3020000	2340000	O75533|SF3B1_HUMAN	Oxidation (M)	M8:Oxidation (M):1000.00	2264	2.5	0
ISRTPVLM(+15.99)	23.08	931.516	8	1.7	466.766	30.99	4200000	3860000	Q9H3K2|GHITM_HUMAN	Oxidation (M)	M8:Oxidation (M):1000.00	2391.1	2.5	0
ITAHPERW	17.16	1008.51	8	-0.1	505.264	26.55		1070000	Q8WUA4|TF3C2_HUMAN			93.3	0.3	1
ITDKAREF	18.57	978.513	8	-0.5	327.178	22.28	2320000	1870000	O75533|SF3B1_HUMAN			20607.1	23	0
ITHRPSLW	23.27	1008.55	8	-1.2	505.282	33.77		1280000	P33897|ABCD1_HUMAN:Q9UBJ2|ABCD2_HUMAN			42.1	0.125	1
ITKYPVLF	11.8	979.574	8	0.5	490.795	58.59		711000	Q12802|AKP13_HUMAN			7132.9	6	0
ITQHSRIW	11.48	1039.56	8	0	520.785	29.98		6860000	Q9HCS7|SYF1_HUMAN			263.9	0.6	1
ITREAQM(+15.99)W	12.28	1049.5	8	-3.4	525.754	29.85		2040000	Q14094|CCNI_HUMAN	Oxidation (M)	M7:Oxidation (M):1000.00	9.1	0.015	1
ITTEGKLW	30.89	946.512	8	0.2	474.264	45.6		7360000	Q9P258|RCC2_HUMAN			114	0.3	1
IYKAVPSW	13.6	962.523	8	-0.6	482.268	63.26		3390000	P41252|SYIC_HUMAN			3812.7	3.5	0
KARLPLRL	11.24	965.65	8	2	322.891	29.39	20300000	8220000	O00767|ACOD_HUMAN			12501.3	11	0
KARLWIEF	13.97	1061.6	8	-2	354.874	39.03		517000	P46934|NEDD4_HUMAN:Q96PU5|NED4L_HUMAN			4663.3	4.5	0
KARNSFRY	27.68	1040.55	8	0.4	521.283	18.28	95500000	124000000	P46779|RL28_HUMAN			4350.5	4	0
KDRSIAVW	19.36	973.534	8	0.4	487.775	44.84	185000	2560000	Q9UKB1|FBW1B_HUMAN:Q9Y297|FBW1A_HUMAN			4293	4	0
KIKVPVDW	36.75	983.58	8	0.2	492.798	45.56		2200000	P13796|PLSL_HUMAN			3859.5	3.5	0
KSFVLPSW	24.05	962.523	8	-0.6	482.268	63.26	147000	8040000	Q9H147|TDIF1_HUMAN			12.9	0.025	1
KSHPPDKW	14.13	993.503	8	-0.8	332.175	17.18		2090000	O00257|CBX4_HUMAN			37.5	0.125	1
KSKNSIQW	19.92	989.529	8	-0.1	495.772	24.56		6370000	Q15329|E2F5_HUMAN			68.9	0.2	1
KSLYRQTF	11.33	1041.56	8	-1	521.787	29.84		3470000	Q8N9V7|TOPZ1_HUMAN			1017.7	1.4	1
KSRDPIIF	25.99	974.555	8	-0.6	488.284	36.37	15600000	19400000	Q14692|BMS1_HUMAN			3667.5	3.5	0
KSTPRPKF	26.24	959.555	8	-2.1	320.858	17.27	2000000	2730000	P62906|RL10A_HUMAN			2375.6	2.5	0
KSVTKDIW	12.25	975.539	8	-1.7	488.776	31.23		608000	Q8NA58|PNDC1_HUMAN			182	0.5	1
KSYERSVI	12.67	980.529	8	-0.6	491.272	24.01		769000	Q9GZU2|PEG3_HUMAN			10633.7	9	0
KSYFSQKW	15.33	1072.53	8	1	537.275	37.29		396000	Q8WXI2|CNKR2_HUMAN			22.7	0.06	1
KTGTAYTF	31.25	887.439	8	-0.8	444.726	32.28	12700000	16100000	P17844|DDX5_HUMAN			1272	1.6	1
KTKDVTVW	31.53	975.539	8	-0.4	488.777	27.23	650000	78100000	Q96DR4|STAR4_HUMAN			110	0.3	1
KTKEAVLL	30.27	900.564	8	-0.1	451.289	24.75	15700000	19600000	P36578|RL4_HUMAN			9690.3	8.5	0
KTKEGYYY	37.6	1050.5	8	0.9	526.259	23.66	6440000	7930000	P08243|ASNS_HUMAN			2647	3	0
KTKKPLLI	33.66	939.648	8	-0.9	470.831	21.71	26700000	21800000	Q9BSR8|YIPF4_HUMAN			10410.1	9	0
KTKRSIQF	33.42	1006.59	8	-1.2	504.303	19.68	18700000	16700000	P68363|TBA1B_HUMAN:P68366|TBA4A_HUMAN			1568.8	1.8	1
KTKTDVLI	15.99	916.559	8	-0.8	459.287	26.63	1420000	1930000	Q9NZ08|ERAP1_HUMAN			12779.1	12	0
KTRFSYAF	26.24	1018.52	8	-1.5	510.268	38.91	6570000	9620000	P24863|CCNC_HUMAN			1926.8	2.5	0
KTRKTYSW	12.88	1068.57	8	0.4	535.293	19.6		629000	Q13415|ORC1_HUMAN			19	0.05	1
KTRSPVTF	15.81	934.524	8	-0.5	468.269	24.94	314000	509000	A5YKK6|CNOT1_HUMAN			1598	1.8	1
KTSLVQLL	20	900.564	8	-1.6	451.289	25.75	3010000	6800000	Q9NU22|MDN1_HUMAN			3144.4	3	0
KTTVARLI	13.52	900.576	8	-0.9	451.295	29.18	1110000	3310000	Q8NBI5|S43A3_HUMAN			9840	8.5	0
KVKESNIW	29.85	1002.55	8	0	502.282	26.37		5400000	Q96JI7|SPTCS_HUMAN			1322.2	1.6	1
KVTPGPPF	17.35	841.47	8	-0.2	421.742	33.53	3870000	9390000	Q68DN1|CB016_HUMAN			23343.6	29	0
LSHQPLQW	15.13	1007.52	8	1.2	504.767	46.19		3850000	Q15825|ACHA6_HUMAN			203.2	0.5	1
LSKARETF	25.46	950.519	8	0.7	476.267	24.93	11200000	9570000	Q9HCJ5|ZSWM6_HUMAN:Q9P217|ZSWM5_HUMAN			5058.7	4.5	0
LSQRGYEW	12.87	1037.49	8	-2.8	519.752	40.14		2070000	P10415|BCL2_HUMAN			221.9	0.5	1
LSRKDSRW	19.49	1046.56	8	0	349.861	19.27		11400000	Q14152|EIF3A_HUMAN			121.8	0.4	1
LTFEM(+15.99)LVL	14.14	980.525	8	2.9	491.271	25.39		695000	B2RTY4|MYO9A_HUMAN	Oxidation (M)	M5:Oxidation (M):1000.00	1266.7	1.6	1
LTRPPNYF	31.69	1006.52	8	2	504.27	44.26	2400000	1120000	Q8N543|OGFD1_HUMAN			1532.5	1.8	1
LTRQPFAI	21.36	944.544	8	0.2	473.279	46.69	2850000	4120000	P28065|PSB9_HUMAN			22447.2	27	0
M(+15.99)TGRAARW	15.86	963.471	8	-0.6	322.164	19.26		1700000	Q86TG7|PEG10_HUMAN	Oxidation (M)	M1:Oxidation (M):1000.00	71.8	0.25	1
MTGRAARW	13.27	947.476	8	0.5	316.833	21.85		1600000	Q86TG7|PEG10_HUMAN			33.4	0.1	1
NSRPPLQW	29.85	996.514	8	1	499.265	44.17		18900000	P54922|ADPRH_HUMAN			238.5	0.6	1
QAAQPTRW	23.88	956.483	8	-1.6	479.248	26.52		3040000	Q9Y5A9|YTHD2_HUMAN			1248.2	1.5	1
QLPERAIF	18.32	972.539	8	-1.2	487.276	31.75		38600	Q13315|ATM_HUMAN			28430.4	45	0
QR(+.98)LWTLTT	10.45	1018.54	8	2.7	510.281	40.13		234000	Q15031|SYLM_HUMAN	Citrullination	R2:Citrullination:1000.00	941	1.3	1
QSTQRDLW	11.41	1032.5	8	0.1	517.257	36.64		6080000	P14151|LYAM1_HUMAN			1843.7	2	1
QTRPVQSW	21.51	1000.51	8	1.1	501.262	29.83		1480000	Q86VP6|CAND1_HUMAN			72.4	0.25	1
R(+42.01)EKKSASW	10.24	1032.54	8	-1.4	345.185	22.93		3860000	Q8N423|LIRB2_HUMAN	Acetylation (N-term)	R1:Acetylation (N-term):1000.00	84.6	0.25	1
RSKIAETF	24.53	950.519	8	-1	476.266	25.87	11200000	15100000	Q9Y5A7|NUB1_HUMAN			1499.9	1.7	1
RSM(+15.99)KGLRW	16.13	1048.56	8	0.3	350.527	20.59		3530000	Q96LL9|DJC30_HUMAN	Oxidation (M)	M3:Oxidation (M):1000.00	8	0.01	1
RSM(+15.99)QWAVR	14.41	1048.52	8	-3.1	350.514	19.93		1740000	O95071|UBR5_HUMAN	Oxidation (M)	M3:Oxidation (M):1000.00	15.6	0.04	1
RSPALFIY	17.09	965.533	8	0	483.774	50.42	2660000	614000	Q9Y2P5|S27A5_HUMAN			1535.2	1.8	1
RSRFPQTF	24.98	1037.54	8	1.5	346.855	31.75	2210000	3870000	Q9Y5V3|MAGD1_HUMAN			912.6	1.3	1
RSTTAHSW	12.45	944.446	8	-0.9	473.23	17.77		337000	Q9UKJ3|GPTC8_HUMAN			38.4	0.125	1
RTALPRIF	14.92	972.587	8	0.4	487.301	45.2	2340000	4510000	Q03518|TAP1_HUMAN			2859.2	3	0
RTGKSYLM(+15.99)	19.84	970.491	8	-0.7	486.252	19.54	3650000	4010000	Q6ZN66|GBP6_HUMAN:Q96PP9|GBP4_HUMAN:Q96PP8|GBP5_HUMAN:P32456|GBP2_HUMAN:P32455|GBP1_HUMAN:Q9H0R5|GBP3_HUMAN:Q8N8V2|GBP7_HUMAN	Oxidation (M)	M8:Oxidation (M):1000.00	1367.6	1.6	1
RTKEVFHF	21.6	1062.56	8	-1.1	355.194	28.51		1860000	Q7L5Y9|MAEA_HUMAN			2992.7	3	0
RTKPPQLL	22.15	951.587	8	0.1	476.801	26.98	2090000	3760000	Q9NU22|MDN1_HUMAN			3550.6	3.5	0
RTRIGYSF	26.72	998.53	8	-2.3	333.85	33.81	338000000	401000000	Q9NYH9|UTP6_HUMAN			598.8	1	1
RTRKEAAW	14.86	1016.55	8	-0.4	339.858	16.56		1900000	O60684|IMA7_HUMAN:P52294|IMA5_HUMAN:O15131|IMA6_HUMAN			56.8	0.175	1
RTRRAVKF	19.44	1032.63	8	-1.5	259.164	16.91	9560000	8980000	P83731|RL24_HUMAN			621.9	1	1
RVAAPKHW	28.84	963.54	8	0.1	322.187	20.17		3020000	Q8TD47|RS4Y2_HUMAN:P62701|RS4X_HUMAN:P22090|RS4Y1_HUMAN			376.9	0.7	1
RVVKHFYW	21.44	1133.61	8	-0.3	378.878	31.96		13100000	O00626|CCL22_HUMAN			323.1	0.7	1
SVSR(+.98)PASW	17.52	889.429	8	-0.1	445.722	26.72		8640000	Q6ZU64|CFA65_HUMAN	Citrullination	R4:Citrullination:1000.00	26.5	0.07	1
TAGAHRLW	32.85	910.477	8	-0.4	456.246	34.84		6150000	O00767|ACOD_HUMAN:Q86SK9|SCD5_HUMAN			346.7	0.7	1
TTKAISRW	28.39	961.534	8	-1.2	481.774	32.76		3480000	P49368|TCPG_HUMAN			134	0.4	1
VAAKPESW	12.61	886.455	8	-1.5	444.234	29.15		838000	Q9BSY4|CHCH5_HUMAN			397.4	0.7	1
VSFEPPKW	18.9	988.502	8	-0.8	495.258	57.84		997000	P29728|OAS2_HUMAN			80.8	0.25	1
VSGKVYQW	22.76	965.497	8	-0.2	483.756	39.61		733000	P49327|FAS_HUMAN			148.7	0.4	1
VSIKAIGW	25.33	872.512	8	-0.3	437.263	54.81		1990000	Q8N697|S15A4_HUMAN			223.2	0.5	1
VSKESPHW	12.32	968.472	8	1.3	323.832	23.29		487000	Q5JSZ5|PRC2B_HUMAN			555.4	0.9	1
VSKVSTTW	28.92	906.481	8	0.2	454.248	32.15		4770000	Q9UKT4|FBX5_HUMAN			186.8	0.5	1
VSRIPVSF	27.61	903.518	8	1.5	452.767	49.05	12800000	16200000	O75427|LRCH4_HUMAN			5882.4	5	0
VTRQGALW	28.09	929.508	8	0	465.761	38.85		18100000	O14925|TIM23_HUMAN:Q5SRD1|TI23B_HUMAN			203.3	0.5	1
VTTIARNW	29.27	959.519	8	0.4	480.767	38.48		8980000	Q15437|SC23B_HUMAN:Q15436|SC23A_HUMAN			844.2	1.2	1
AAASHSYYW	35.9	1054.45	9	0.7	528.233	41.11	739000	15200000	Q9UHI6|DDX20_HUMAN			29.4	0.09	1
AADETLRLW	30.1	1073.55	9	1	537.783	60.92		4760000	Q12834|CDC20_HUMAN			255.2	0.6	1
AAIKIIRQL	27.46	1024.68	9	0.7	513.346	39.62	4480000	5090000	Q9NYB0|TE2IP_HUMAN			2119.4	2.5	0
AAIVIQQKW	25.15	1055.61	9	0.2	528.814	48.72		985000	B2RTY4|MYO9A_HUMAN			17.4	0.04	1
AAKAVLADW	17.64	943.513	9	1	472.764	47.41		667000	Q9NVN8|GNL3L_HUMAN			37.6	0.125	1
AALVIQKYW	27.63	1090.62	9	-1.1	546.315	61.09		961000	Q8IZT6|ASPM_HUMAN			7.9	0.01	1
AANPHSFVF	32.3	988.477	9	-0.7	495.245	48.69	5510000	7420000	Q9NQ55|SSF1_HUMAN			2105	2.5	0
AAPATRAAL	27.02	840.482	9	0.1	421.248	23.81	2700000	493000	Q8N697|S15A4_HUMAN			19489.4	21	0
AAPEGKRSL	29.6	927.514	9	-0.5	310.178	17.16	6900000	7590000	Q9Y6B2|EID1_HUMAN			24560	32	0
AAQITQRKW	32.66	1100.61	9	-0.2	551.312	24.8		17800000	P30485|1B47_HUMAN:P30492|1B54_HUMAN:P30484|1B46_HUMAN:Q29940|1B59_HUMAN:P30464|1B15_HUMAN:P30493|1B55_HUMAN:P30495|1B56_HUMAN:P18465|1B57_HUMAN:Q29718|1B82_HUMAN:P01889|1B07_HUMAN:P30480|1B42_HUMAN:Q95365|1B38_HUMAN:P30475|1B39_HUMAN:Q29836|1B67_HUMAN:P30462|1B14_HUMAN:P30479|1B41_HUMAN:P30483|1B45_HUMAN:P30488|1B50_HUMAN:P30487|1B49_HUMAN:P03989|1B27_HUMAN:Q04826|1B40_HUMAN:P30460|1B08_HUMAN:P30…			46.9	0.15	1
AARLIQTTW	28.69	1058.59	9	-1.1	530.3	49.23	1120000	12700000	Q8IZT6|ASPM_HUMAN			11.7	0.02	1
AARTIQTAF	38.39	977.529	9	-0.7	489.772	36.21	104000000	131000000	Q5JU85|IQEC2_HUMAN:Q6DN90|IQEC1_HUMAN			1383.8	1.6	1
AARTWLGVW	11.81	1058.57	9	0.1	530.29	66.69		609000	Q9UII2|ATIF1_HUMAN			47.3	0.15	1
AASPHYQEW	45.14	1087.47	9	-1.5	544.743	36.27		4850000	Q6SPF0|SAMD1_HUMAN			176.6	0.5	1
AGLEVRSSW	11.32	1003.51	9	0	502.762	44.07		19400000	Q9BVN2|RUSC1_HUMAN			254.7	0.6	1
AGTQLLYAF	17.18	982.512	9	0.9	492.264	56.6	1540000	2420000	Q96RU7|TRIB3_HUMAN			12147.7	11	0
ALRVLNSYW	22.05	1120.6	9	-0.8	561.308	61.75	891000	14200000	P61313|RL15_HUMAN			1056.9	1.4	1
ASAIIIQRW	39.02	1056.61	9	0.7	529.312	53.67	8800000	21900000	Q8IZT6|ASPM_HUMAN			18.3	0.04	1
ASAILFREW	25.47	1091.58	9	0.9	546.796	64.24	830000	4060000	Q7RTP0|NIPA1_HUMAN			98.6	0.3	1
ASFQAERKF	29.27	1082.55	9	3.2	361.859	28.19	0	1180000	O94953|KDM4B_HUMAN			122.9	0.4	1
ASGRFGQDF	34.84	983.446	9	0.7	492.731	37.88	1330000	1420000	Q9Y490|TLN1_HUMAN			2567.6	3	0
ASHKGQKLW	40.65	1053.57	9	0.4	527.793	18.75		20200000	O15049|N4BP3_HUMAN			30.4	0.09	1
ASKKVQRPW	28.33	1098.63	9	-0.2	367.217	19.22		9010000	P05166|PCCB_HUMAN			40.3	0.125	1
ASKSESIWV	11.07	1005.51	9	-0.3	503.764	39.94		5000000	Q8NFP9|NBEA_HUMAN			14824.6	14	0
ASLDISRKW	40.45	1074.58	9	0.2	538.298	40.1	11600000	118000000	Q9NWU5|RM22_HUMAN			23.6	0.06	1
ASLPEAQVW	16.66	999.503	9	-0.4	500.758	62.27		1370000	Q99640|PMYT1_HUMAN			13.4	0.025	1
ASLPLRVSF	29.62	988.571	9	-0.4	495.292	60.54	17200000	26200000	O96005|CLPT1_HUMAN			100.8	0.3	1
ASM(+15.99)GFDPRW	16.46	1081.47	9	0.1	541.74	49.08		1430000	Q9Y520|PRC2C_HUMAN	Oxidation (M)	M3:Oxidation (M):1000.00	23	0.06	1
ASM(+15.99)TVRELF	26.79	1068.53	9	-0.6	535.271	46.05	2890000	4270000	Q8IY37|DHX37_HUMAN	Oxidation (M)	M3:Oxidation (M):1000.00	478	0.8	1
ASMTVRELF	17.96	1052.53	9	-0.8	527.273	56.31		732000	Q8IY37|DHX37_HUMAN			280.3	0.6	1
ASRAM(+15.99)IENF	17.42	1053.49	9	2.3	527.754	34.85	30500000	35700000	P41227|NAA10_HUMAN	Oxidation (M)	M5:Oxidation (M):1000.00	415.8	0.8	1
ASRDDRSTW	17.01	1092.49	9	-1.2	365.172	19.96		2900000	Q92974|ARHG2_HUMAN			158.9	0.4	1
ASRGPIAFW	22.67	1003.52	9	0	502.769	60.24	1000000	12900000	Q9UNF1|MAGD2_HUMAN			36.8	0.125	1
ASRGSTSSW	23.41	937.425	9	-1.1	469.719	21.11		5680000	Q2V2M9|FHOD3_HUMAN			43	0.15	1
ASRILKEGW	26.31	1058.59	9	-0.9	353.869	33.45		2390000	Q8IY92|SLX4_HUMAN			40.1	0.125	1
ASRPKSYIY	17	1083.57	9	0.9	542.793	26.23	4470000	2090000	P42898|MTHR_HUMAN			483.9	0.8	1
ASSLAIREW	20.94	1031.54	9	-0.7	516.777	49.43		908000	Q9Y4A5|TRRAP_HUMAN			40.2	0.125	1
ASSPVLRQM(+15.99)	14.73	1003.51	9	1.1	502.764	24.55	1900000	2230000	Q15788|NCOA1_HUMAN	Oxidation (M)	M9:Oxidation (M):1000.00	4637.8	4.5	0
ASTQPTHSW	19.66	1013.46	9	-0.9	507.735	25.43		2190000	O75940|SPF30_HUMAN			49.6	0.15	1
ASVPRTTVW	18.97	1015.54	9	1.7	508.781	41.94		724000	O00468|AGRIN_HUMAN			34.4	0.1	1
ASVSTVQLW	11.1	989.518	9	0.1	495.766	66.75		305000	P42858|HD_HUMAN			26.4	0.07	1
ASYRQVASF	18.8	1027.51	9	0.2	514.762	39.01	252000	472000	Q9UKK3|PARP4_HUMAN			189.4	0.5	1
ATAAVARGW	28.58	901.477	9	0	451.746	33.03		9580000	Q9Y4P3|TBL2_HUMAN			15.4	0.03	1
ATADVEWRW	31.67	1132.53	9	-0.5	567.272	59.93	274000	2670000	Q96G21|IMP4_HUMAN			16	0.04	1
ATAQRVAAW	41.32	972.514	9	-1.1	487.264	32.5		1950000	Q96HA7|TONSL_HUMAN			293.7	0.6	1
ATDAAIRVW	32	1001.53	9	-1.9	501.771	48.34		2810000	Q12788|TBL3_HUMAN			113.9	0.3	1
ATDGKVLLW	10.56	1001.55	9	-0.4	501.784	56.68		1060000	Q96EX3|WDR34_HUMAN			754.6	1.1	1
ATFGRPAEW	17.05	1033.5	9	-0.6	517.756	45.86		647000	Q9NVS9|PNPO_HUMAN			20.8	0.05	1
ATFVGSRQW	18.27	1050.52	9	1.6	526.27	43.23		1850000	Q9NUQ7|UFSP2_HUMAN			13.7	0.03	1
ATHRIPIIW	15.43	1105.64	9	-0.6	553.827	51.18		4010000	O00750|P3C2B_HUMAN			25.1	0.07	1
ATHSSSTSW	25.34	962.409	9	-0.1	482.212	21.79		2390000	Q9UPN3|MACF1_HUMAN			30.4	0.09	1
ATHVLPLHW	18.46	1072.58	9	-0.5	537.298	50.34		934000	Q9UJX2|CDC23_HUMAN			31	0.09	1
ATIPNARQF	15.88	1016.54	9	0.3	509.278	39.56	578000	495000	P42285|MTREX_HUMAN			211.3	0.5	1
ATIRPWSTF	29.77	1077.56	9	-0.1	539.788	56.68		4400000	Q9UI14|PRAF1_HUMAN			446.2	0.8	1
ATKKEITFF	44.98	1083.6	9	1	542.806	40.76	64400000	89000000	P20592|MX2_HUMAN			1746.4	1.9	1
ATKKLIGEW	37.29	1044.6	9	0.2	523.306	35.57		2820000	Q9UHV7|MED13_HUMAN			106.1	0.3	1
ATLELTHNW	32.37	1083.53	9	0.7	542.775	52.09	3780000	21800000	Q04760|LGUL_HUMAN			22.6	0.06	1
ATLKGNAAW	36.69	930.492	9	-0.2	466.253	33.2	4290000	120000000	P07814|SYEP_HUMAN			54.6	0.175	1
ATLKNPILW	32.85	1054.62	9	0.6	528.316	59.92	1540000	28200000	P04844|RPN2_HUMAN			17.9	0.04	1
ATLLITRQF	26.52	1061.62	9	-0.1	531.819	54.87	4700000	7430000	Q9HCE9|ANO8_HUMAN			257.2	0.6	1
ATLLLERNF	23.72	1075.6	9	-0.1	538.808	56.92	5960000	8690000	O60443|GSDME_HUMAN			1696.1	1.9	1
ATLRTSRLL	19.37	1029.63	9	0.8	344.217	31.39	2090000	469000	P11926|DCOR_HUMAN			650.3	1	1
ATNPESKVF	32.46	991.497	9	-0.4	496.756	32.03	2520000	2700000	P27348|1433T_HUMAN			1100.8	1.4	1
ATNRITVTW	31.55	1060.57	9	1.1	531.291	48	22500000	92400000	Q8N2W9|PIAS4_HUMAN			20.5	0.05	1
ATNVNNWHW	35.25	1140.51	9	-1.1	571.262	51.85	957000	16700000	O95433|AHSA1_HUMAN			16.7	0.04	1
ATQIKTYSW	18.69	1096.56	9	-0.5	549.285	43.38		2580000	O95716|RAB3D_HUMAN			40.7	0.125	1
ATRKAFTTF	27.8	1041.56	9	2.3	521.789	29.11	18800000	25100000	Q14643|ITPR1_HUMAN			897.7	1.2	1
ATRPDYISW	23.57	1107.53	9	-0.6	554.774	52.32	9850000	87700000	P23258|TBG1_HUMAN			34.3	0.1	1
ATRRVHPAL	11.58	1019.6	9	-0.3	340.873	17.83	502000	1060000	Q9Y6I9|TX264_HUMAN			5287.8	4.5	0
ATRSGQDLW	26.11	1032.5	9	0.1	517.257	36.09		11700000	Q9BV29|CCD32_HUMAN			90.6	0.25	1
ATSKVALVY	30.54	950.544	9	1.3	476.28	38.98	6640000	9130000	P06576|ATPB_HUMAN			1307.5	1.6	1
ATSKYLIGW	19.62	1037.55	9	-0.1	519.784	57.93		2680000	O43166|SI1L1_HUMAN			101.6	0.3	1
ATSQAQAGW	33.39	918.42	9	-0.4	460.217	33.75		6210000	O95864|FADS2_HUMAN			44.7	0.15	1
ATSSSQRDW	34.69	1036.46	9	0	519.236	21.84		4930000	Q96T88|UHRF1_HUMAN			78.8	0.25	1
ATVEQQEHW	19	1126.5	9	-0.5	564.259	32.78		636000	Q96G74|OTUD5_HUMAN			71.8	0.25	1
ATVGRRYLW	10.67	1120.61	9	1.1	561.315	38.48		10200000	P42166|LAP2A_HUMAN			20.6	0.05	1
ATVILQRAF	25.6	1017.6	9	1	509.806	50.39	152000	956000	Q8IZT6|ASPM_HUMAN			1354.1	1.6	1
ATVTIQRHW	29.51	1110.59	9	2.8	371.206	33.53	1040000	7860000	Q8IZT6|ASPM_HUMAN			19.9	0.05	1
ATYM(+15.99)KPEM(+15.99)W	36.75	1187.5	9	-0.2	594.757	35.7	2420000	45600000	Q99613|EIF3C_HUMAN:B5ME19|EIFCL_HUMAN	Oxidation (M)	M4:Oxidation (M):1000.00;M8:Oxidation (M):1000.00	275.5	0.6	1
ATYM(+15.99)KPEMW	30.29	1171.5	9	-0.2	586.759	44.68		18400000	Q99613|EIF3C_HUMAN:B5ME19|EIFCL_HUMAN	Oxidation (M)	M4:Oxidation (M):63.97	27.9	0.08	1
ATYMKPEM(+15.99)W	32.62	1171.5	9	-0.2	586.759	44.68		18400000	Q99613|EIF3C_HUMAN:B5ME19|EIFCL_HUMAN	Oxidation (M)	M8:Oxidation (M):26.38	20.2	0.05	1
ATYMKPEMW	25.25	1155.51	9	-1	578.761	53.11		2820000	Q99613|EIF3C_HUMAN:B5ME19|EIFCL_HUMAN			44.7	0.15	1
AVDSTVKVW	17.23	1003.53	9	3	502.776	45.07		2130000	Q6Q0C0|TRAF7_HUMAN			3153.2	3	0
AVKQWEQRW	14.14	1229.63	9	1.4	615.823	36.8		556000	Q9Y2X0|MED16_HUMAN			269.8	0.6	1
AVWTRAYGW	17.39	1108.55	9	-0.8	555.279	57.79		204000	Q5VW36|FOCAD_HUMAN			77.3	0.25	1
C(+119.00)SKKDVRNF	17.37	1214.55	9	-0.9	405.858	16.22		255000	P32248|CCR7_HUMAN	Cysteinylation	C1:Cysteinylation:1000.00	14490.4	14	0
D(+42.01)AALRKITF	12.26	1075.6	9	-1	538.808	36.53	2380000	1180000	Q969X6|UTP4_HUMAN	Acetylation (N-term)	D1:Acetylation (N-term):1000.00	16407.1	16	0
EILATHPTW	14.77	1066.54	9	0.3	534.28	48.2	1430000	29600000	Q5JPE7|NOMO2_HUMAN:Q15155|NOMO1_HUMAN:P69849|NOMO3_HUMAN			1511.5	1.7	1
EKPHVVAHF	17.06	1062.56	9	-2.2	355.193	29.72		357000	P13807|GYS1_HUMAN			32173.4	65	0
ETKKKVFLW	15.35	1177.69	9	-0.4	589.85	36.27		4490000	Q86V20|SHLD2_HUMAN			311.5	0.6	1
ETLKLISGW	24.01	1045.58	9	-0.1	523.798	65.64		6460000	O14980|XPO1_HUMAN			126.7	0.4	1
FAPYNKPSL	13.86	1035.54	9	-1.3	518.776	43.48		1720000	Q86UW9|DTX2_HUMAN			22568.7	27	0
FARKFNALF	16.71	1112.61	9	0.1	557.314	49.83	3770000	16000000	Q00610|CLH1_HUMAN			315.9	0.6	1
FLAANGADL	11.35	890.45	9	0.6	446.232	52.78	1900000	1530000	Q86YT6|MIB1_HUMAN			22748.9	28	0
FSHRIYVAY	16.4	1154.59	9	1.7	578.302	39.69	1770000	962000	P46977|STT3A_HUMAN			4501	4	0
FSKKC(+119.00)SERW	12.97	1288.57	9	-1.2	430.53	18.28		760000	P09429|HMGB1_HUMAN:O15347|HMGB3_HUMAN:P26583|HMGB2_HUMAN	Cysteinylation	C5:Cysteinylation:1000.00	120.1	0.4	1
FSKPSSDTF	13.65	1014.47	9	-1.1	508.24	36.43	294000	343000	O15504|NUPL2_HUMAN			3443.3	3.5	0
FSKSDLVNW	32.32	1094.54	9	-0.5	548.277	56.97		35200000	O43847|NRDC_HUMAN			311.3	0.6	1
FSLKNVKHF	29.34	1118.62	9	-1.1	373.881	35.77	6220000	6090000	O00148|DX39A_HUMAN			360.4	0.7	1
FSLPAQPLW	19.81	1057.56	9	-0.4	529.787	83.21		8670000	O60216|RAD21_HUMAN			9	0.015	1
FTKPPIGTW	44.7	1045.56	9	0.9	523.788	53.7	6480000	84700000	P40763|STAT3_HUMAN			52.7	0.175	1
FVKKLEHSW	34.7	1172.63	9	-0.2	587.324	28.08	1440000	48800000	A2A3N6|PIPSL_HUMAN:Q99755|PI51A_HUMAN			91.2	0.25	1
GARQVFERW	22.34	1147.59	9	-1.4	383.536	38.65		3200000	Q9BZJ0|CRNL1_HUMAN			86.9	0.25	1
GAVRENYTW	23	1094.51	9	1.5	548.265	40.27	751000	28500000	Q8IVD9|NUDC3_HUMAN			8.4	0.01	1
GSASVNSRW	36.9	962.457	9	-0.5	482.236	27.52		7390000	Q5SW79|CE170_HUMAN			33.1	0.1	1
GSFGGIRLY	15.81	968.508	9	-0.7	485.261	59.71	872000	2010000	Q5VYK3|ECM29_HUMAN			426.9	0.8	1
GSHSM(+15.99)RYFY	23.22	1162.49	9	1.4	388.503	28.36	11500000	11600000	P30485|1B47_HUMAN:P30492|1B54_HUMAN:P30484|1B46_HUMAN:Q29940|1B59_HUMAN:P30464|1B15_HUMAN:P30493|1B55_HUMAN:P30495|1B56_HUMAN:P18465|1B57_HUMAN:Q29718|1B82_HUMAN:P01889|1B07_HUMAN:P30480|1B42_HUMAN:Q95365|1B38_HUMAN:P30475|1B39_HUMAN:Q29836|1B67_HUMAN:P30462|1B14_HUMAN:P30481|1B44_HUMAN:P18464|1B51_HUMAN:P30490|1B52_HUMAN:P30498|1B78_HUMAN:P30491|1B53_HUMAN:P10319|1B58_HUMAN:P04222|1C03_HUMAN:P30…	Oxidation (M)	M5:Oxidation (M):1000.00	452.4	0.8	1
GSKDKNFQW	37.59	1108.53	9	0	555.272	30.16		12700000	P49792|RBP2_HUMAN			131.8	0.4	1
GSKSSNASW	28.15	922.414	9	-1	462.214	19.76		2160000	Q9UPQ9|TNR6B_HUMAN			34.9	0.1	1
GSKVIKIAW	19.34	1000.61	9	-0.1	501.311	42.22		1670000	Q9UPN6|SCAF8_HUMAN			131.8	0.4	1
GSM(+15.99)GLRSLW	27.82	1021.5	9	0.6	511.758	51.98	758000	11900000	Q9BV87|CNPD1_HUMAN	Oxidation (M)	M3:Oxidation (M):1000.00	15.2	0.03	1
GSRPSDARF	34.01	991.484	9	-1	331.502	19.92	1100000	1170000	Q15424|SAFB1_HUMAN			290.3	0.6	1
GSVSIFRQF	21.88	1039.55	9	1.6	520.781	57.44	4010000	7100000	Q9UJP4|KLH21_HUMAN			715.7	1.1	1
GSYAVQAKF	14.99	969.492	9	-0.3	485.753	40.28		218000	P15311|EZRI_HUMAN			47.8	0.15	1
GTALLPHQW	30.67	1021.53	9	0.6	511.775	51.33		1590000	O14734|ACOT8_HUMAN			12.4	0.025	1
GTAQPKQSW	20.86	1001.49	9	-0.6	501.753	23.91		491000	Q9UKY1|ZHX1_HUMAN			64.5	0.2	1
GTDRNAYVW	21.38	1080.5	9	-0.4	541.256	42.19	1020000	40100000	O15143|ARC1B_HUMAN			58.1	0.175	1
GTDRRLNVW	14.96	1115.58	9	1.2	372.869	35.84		6510000	Q09028|RBBP4_HUMAN:Q16576|RBBP7_HUMAN			356	0.7	1
GTFRGTRYF	24.84	1103.55	9	-1.5	368.857	36.4	5080000	11400000	Q9NQC7|CYLD_HUMAN			140	0.4	1
GTHKVTVLF	43.75	1000.57	9	-0.5	501.292	38.31	105000000	119000000	P21333|FLNA_HUMAN			588.1	1	1
GTHSLDIKW	25.28	1055.54	9	0	528.777	43.91		28000000	Q9UHQ1|NARF_HUMAN			54.5	0.175	1
GTHTVSVKY	35.24	990.513	9	-0.2	331.178	22.64	5170000	4750000	P21333|FLNA_HUMAN			2258.3	2.5	0
GTINERPEF	38.13	1061.51	9	1.5	531.765	39.08	6600000	8040000	Q58A45|PAN3_HUMAN			3942.4	4	0
GTIPERPGW	24.41	1011.51	9	-0.1	506.764	42.59		5900000	O75385|ULK1_HUMAN			37.8	0.125	1
GTISREHPW	27.3	1081.53	9	-0.2	541.772	29.27		11200000	P08865|RSSA_HUMAN			37.4	0.125	1
GTKTKSNTW	24.14	1021.52	9	-0.7	511.767	17.91	1040000	979000	Q8NB66|UN13C_HUMAN			84	0.25	1
GTKWIANNW	34.69	1088.54	9	-0.8	545.277	51.75		8740000	Q9NXG6|P4HTM_HUMAN			223.5	0.5	1
GTLETKYKW	29.02	1124.59	9	0.4	563.301	36.86		2670000	P45880|VDAC2_HUMAN			7.9	0.01	1
GTLKERVQW	37.32	1115.61	9	-0.7	558.811	33.38		14800000	Q9UBW7|ZMYM2_HUMAN			13.3	0.025	1
GTLKGHNGW	52.8	968.483	9	0.5	485.249	23.1	5670000	88200000	P63244|RACK1_HUMAN			38.3	0.125	1
GTLKKSTSW	13.24	1006.54	9	2.4	504.281	21.68		217000	O75962|TRIO_HUMAN			15.5	0.03	1
GTLKVLRTY	14.7	1049.62	9	1.4	350.882	33.7	596000	353000	P0C0L4|CO4A_HUMAN:P0C0L5|CO4B_HUMAN			178.8	0.5	1
GTLSGHASW	42.62	914.425	9	-0.3	458.219	33.49	2430000	30400000	Q9GZS3|WDR61_HUMAN			18.8	0.05	1
GTM(+15.99)DIRHFF	38.34	1138.52	9	-0.2	570.269	48.8	26600000	38200000	Q9NTZ6|RBM12_HUMAN	Oxidation (M)	M3:Oxidation (M):1000.00	693.1	1.1	1
GTMDIRHFF	30.18	1122.53	9	0.1	562.271	59.87	518000	5880000	Q9NTZ6|RBM12_HUMAN			687.7	1.1	1
GTMPLRNIF	22.02	1047.55	9	0.1	524.784	58.46		1500000	Q9NZ01|TECR_HUMAN			181.6	0.5	1
GTNAKVRTW	37.18	1031.55	9	0.6	516.783	21.45		6630000	Q9H0H0|INT2_HUMAN			52.6	0.175	1
GTRGSNTSW	16.57	964.436	9	-1.8	483.224	21.54		5670000	O94941|RNF37_HUMAN			17.4	0.04	1
GTRQVFSM(+15.99)A	11.24	1011.48	9	-1.5	506.747	32.06		261000	Q6SPF0|SAMD1_HUMAN	Oxidation (M)	M8:Oxidation (M):1000.00	5109	4.5	0
GTSSVARAW	29.63	933.467	9	0.4	467.741	31.43		5200000	P52569|CTR2_HUMAN:P30825|CTR1_HUMAN			55.2	0.175	1
GTVITPDTW	21.49	988.487	9	0.9	495.251	60.72		4180000	Q9P021|CRIPT_HUMAN			69.9	0.2	1
GTVLKIITF	36.34	990.611	9	-1.1	496.312	67.56	3640000	6300000	P26599|PTBP1_HUMAN:O95758|PTBP3_HUMAN			3225.8	3	0
GTVLKTSSW	41.59	977.518	9	-0.7	489.766	39.5		12900000	Q460N5|PAR14_HUMAN			90.5	0.25	1
GTYGVRAAW	41.01	979.487	9	0.8	490.752	43.98	12300000	104000000	P13598|ICAM2_HUMAN			26.7	0.07	1
GVHTVHVTF	53.01	995.519	9	-0.9	498.766	35.32	70700000	83500000	P21333|FLNA_HUMAN			5973.8	5.5	0
GVKPNPASW	19.65	954.492	9	-1.6	478.253	35.5		424000	Q8IZA0|K319L_HUMAN			208.4	0.5	1
GVRATDSRW	25.39	1046.53	9	-0.1	349.849	23.01		5890000	Q6PJ61|FBX46_HUMAN			162	0.4	1
H(+42.01)TDLPVSVF	15.71	1055.53	9	0.4	528.772	48	1530000	1570000	Q7L5N1|CSN6_HUMAN	Acetylation (N-term)	H1:Acetylation (N-term):1000.00	6807.9	6	0
H(+42.01)VVNLVHSF	10.82	1092.57	9	0	547.293	41.6		3900000	Q8NB14|UBP38_HUMAN	Acetylation (N-term)	H1:Acetylation (N-term):1000.00	5361	5	0
HAATTSLSW	25.85	972.466	9	0.8	487.241	40.73		2290000	Q16665|HIF1A_HUMAN			10.2	0.015	1
HAFAGSAAW	25.65	916.419	9	1.8	459.218	40.84		710000	Q14761|PTCA_HUMAN			8.9	0.015	1
HAGAAYREV	13.76	972.478	9	-1.5	487.245	18.72	2630000	840000	Q03052|PO3F1_HUMAN			13084.8	12	0
HAGNINFKW	37.05	1085.54	9	0.5	543.778	42.46		6080000	P35221|CTNA1_HUMAN			9.6	0.015	1
HAGPIVSVW	16.02	964.513	9	-0.3	483.264	53.18		1760000	Q9NQG5|RPR1B_HUMAN			14	0.03	1
HAHYIAQC(+119.00)W	14.46	1246.5	9	-0.7	416.507	31.86		1710000	Q9BSV6|SEN34_HUMAN	Cysteinylation	C8:Cysteinylation:1000.00	13.9	0.03	1
HAIPLRSSW	23.4	1065.57	9	-0.1	533.793	36.53	1960000	118000000	P62879|GBB2_HUMAN:Q9HAV0|GBB4_HUMAN:P62873|GBB1_HUMAN:P16520|GBB3_HUMAN			7.5	0.01	1
HAITRLEAW	11.95	1095.58	9	0.8	548.799	37.16		3130000	P52569|CTR2_HUMAN			43.3	0.15	1
HAM(+15.99)TNDVTW	10.56	1089.45	9	-0.6	545.734	33.56		464000	Q8NG08|HELB_HUMAN	Oxidation (M)	M3:Oxidation (M):1000.00	10.9	0.02	1
HAPFTATSL	13.63	943.476	9	-0.2	472.745	41.13		113000	O95714|HERC2_HUMAN:Q9BVR0|HRC23_HUMAN			8979.5	7.5	0
HAPIRVSPL	14.17	988.582	9	-2.2	495.297	32.97	1960000	2980000	O60336|MABP1_HUMAN			18311.4	19	0
HAPVRPVTL	10.28	988.582	9	-0.4	495.298	31.46		1620000	O75608|LYPA1_HUMAN			11368.7	10	0
HARNLAIVW	14.76	1078.6	9	1.9	540.31	44.75		5350000	O14559|RHG33_HUMAN:Q7Z6I6|RHG30_HUMAN			10.5	0.015	1
HARNLALVW	14.76	1078.6	9	1.9	540.31	44.75		5350000	Q2M1Z3|RHG31_HUMAN			8.4	0.01	1
HASQVC(+119.00)RNW	19.59	1218.5	9	-0.7	407.174	20.1		751000	Q9UKT7|FBXL3_HUMAN	Cysteinylation	C6:Cysteinylation:1000.00	75.3	0.25	1
HATGHHYTW	35.1	1108.48	9	-0.7	370.502	19.49		4820000	P22059|OSBP1_HUMAN			11.8	0.02	1
HSFLYQPDW	29.78	1191.53	9	0.1	596.775	63.11	1640000	17200000	P37268|FDFT_HUMAN			8.2	0.01	1
HSGPSKWNW	41.51	1097.5	9	-1.1	549.759	33.72		30200000	Q86XP3|DDX42_HUMAN			13.6	0.03	1
HSHDLQRM(+15.99)F	13.56	1185.53	9	0.6	396.186	21.71	1080000	969000	P23497|SP100_HUMAN	Oxidation (M)	M8:Oxidation (M):1000.00	153.3	0.4	1
HSHPHITVW	43.2	1112.55	9	-0.5	557.283	28.47	4570000	85900000	P46736|BRCC3_HUMAN			8.5	0.01	1
HSKELITAW	25.75	1083.57	9	2.8	542.794	40.2		2370000	Q9NR82|KCNQ5_HUMAN:P56696|KCNQ4_HUMAN:O43525|KCNQ3_HUMAN			16.6	0.04	1
HSKPTTRDW	37.6	1126.55	9	0.9	376.525	18.25		9700000	Q9H013|ADA19_HUMAN			13.4	0.025	1
HSLPAVRQY	27.25	1069.57	9	-2.1	357.529	28.77	10800000	24000000	Q15008|PSMD6_HUMAN			27.2	0.08	1
HSNGTVSLW	27.46	999.477	9	0.8	500.746	46.4	2950000	89700000	O15213|WDR46_HUMAN			16	0.04	1
HSNPEPKTF	41.18	1055.5	9	1.4	528.76	21.67	1700000	1600000	Q9NS87|KIF15_HUMAN			103	0.3	1
HSNPGDYAW	28.79	1045.43	9	0.4	523.72	39.78		11300000	Q9Y4L5|RN115_HUMAN			22.3	0.06	1
HSQVC(+119.00)SILW	13.22	1190.52	9	-0.1	596.268	52.45		2660000	Q12834|CDC20_HUMAN	Cysteinylation	C5:Cysteinylation:1000.00	26	0.07	1
HSREGPASW	29.22	1025.47	9	-1.7	513.74	23.05		5550000	Q8N393|ZN786_HUMAN			14.2	0.03	1
HSREIRELF	15.1	1185.63	9	-0.9	396.215	33.62	1520000	1740000	Q9Y4C8|RBM19_HUMAN			69.7	0.2	1
HSRPIVTVW	18.61	1093.6	9	0.2	547.809	40.07		22500000	Q96P16|RPR1A_HUMAN			4.4	0.01	1
HSRQGSDEW	18.58	1100.46	9	0.6	551.239	19.07		427000	Q5PRF9|SMAG2_HUMAN			104.6	0.3	1
HSSGILPKW	30.41	1023.55	9	0.9	512.783	40.98		14100000	Q8NDX1|PSD4_HUMAN			10.4	0.015	1
HSTKLIQEW	28.76	1140.59	9	0.7	571.304	36.76		3140000	Q9Y223|GLCNE_HUMAN			13.2	0.025	1
HSTLVPHEW	44.05	1104.54	9	-0.5	553.275	37.14		9780000	Q8IUI8|CRLF3_HUMAN			10.3	0.015	1
HSYPGASGW	31.18	960.409	9	-1	481.211	37.17		3300000	Q7L7X3|TAOK1_HUMAN			11	0.02	1
HSYSVLERF	17.78	1136.56	9	4.5	569.29	43.68	3220000	1360000	Q53EL6|PDCD4_HUMAN			39.9	0.125	1
HTIQIRQDW	31.41	1195.61	9	1	598.813	38.21	1850000	12300000	Q8WXB1|MT21A_HUMAN			18.4	0.04	1
HTLENQREF	18.43	1172.56	9	0.5	587.286	25.28	2690000	3670000	O15031|PLXB2_HUMAN			90.9	0.25	1
HTNPVGTEW	38.72	1039.47	9	-0.3	520.743	36.27		21700000	Q9NV66|TYW1_HUMAN			7.1	0.01	1
HTQENC(+119.00)ETW	28.05	1265.44	9	0.1	633.729	23.41		12900000	P49368|TCPG_HUMAN	Cysteinylation	C6:Cysteinylation:1000.00	25.9	0.07	1
HTQKNRQFF	40.73	1204.61	9	-0.4	402.544	20.28	11000000	14700000	P86791|CCZ1_HUMAN:P86790|CCZ1B_HUMAN			771.8	1.1	1
HTRSDVRLY	42.44	1145.59	9	0	382.872	21.82	15600000	18400000	Q86TI2|DPP9_HUMAN			165.3	0.4	1
HTSSTTSAW	30.03	976.425	9	-0.1	489.22	23.41		8360000	Q16850|CP51A_HUMAN			35.8	0.125	1
HTTGM(+15.99)DVLW	12.11	1074.48	9	-0.6	538.247	46.8		923000	O15294|OGT1_HUMAN	Oxidation (M)	M5:Oxidation (M):1000.00	15.2	0.03	1
HTVGLSSTW	12.47	986.482	9	-3.4	494.247	44.1		503000	Q9H816|DCR1B_HUMAN			8.5	0.01	1
HTWNGIRHL	45.87	1132.59	9	0.5	378.537	27.61	6300000	47000000	Q99643|C560_HUMAN			789.8	1.1	1
I(+42.01)QDHLRLAF	11.61	1153.62	9	0.2	577.82	47.73		1950000	Q96JI7|SPTCS_HUMAN	Acetylation (N-term)	I1:Acetylation (N-term):1000.00	7489.4	6.5	0
I(+42.01)YAWSIGGF	14.94	1054.51	9	-2.3	528.262	47.22	5470000	4090000	O95870|ABHGA_HUMAN	Acetylation (N-term)	I1:Acetylation (N-term):1000.00	838.5	1.2	1
IAALHRDEW	20.61	1109.56	9	-2	555.787	34.68		429000	P49591|SYSC_HUMAN			191.1	0.5	1
IAAPDSRRW	12.63	1070.56	9	-0.3	357.861	34.81		3330000	O95297|MPZL1_HUMAN			11.3	0.02	1
IAAQRTINW	34.44	1071.58	9	1.7	536.799	43.32		8150000	Q5T4S7|UBR4_HUMAN			250.4	0.6	1
IAKKTTPLL	29.05	983.638	9	-0.1	492.826	26.83	1690000	1840000	Q9BZI7|REN3B_HUMAN			3124	3	0
IAKVNNVVW	32.46	1041.6	9	0.4	521.806	46.76		15300000	P26639|SYTC_HUMAN			15.9	0.04	1
IALPPIAKW	16.52	1007.62	9	1	504.816	67.9		2740000	Q8NFP9|NBEA_HUMAN:P50851|LRBA_HUMAN			5.5	0.01	1
IARDFNPNW	12.26	1131.55	9	-0.3	566.78	48.66		2690000	Q16531|DDB1_HUMAN			71.9	0.25	1
IAREEASNF	11.55	1035.5	9	0.6	518.757	28.76	508000	544000	P25788|PSA3_HUMAN			2572.4	3	0
IARVTNVEW	10.42	1086.58	9	0	544.298	47.24		3550000	Q9ULZ3|ASC_HUMAN			9.4	0.015	1
IAVKVNHSY	34.24	1029.56	9	-0.2	344.194	26.53	4230000	4780000	Q8N2W9|PIAS4_HUMAN			96.3	0.3	1
IGYVDTTHW	28.26	1090.51	9	0.9	546.262	53.99		3280000	Q6UWU4|CF089_HUMAN			40.1	0.125	1
IIRPQNVSW	23.85	1111.61	9	-1.5	556.813	48.17		7820000	Q96PZ0|PUS7_HUMAN			56.8	0.175	1
ILRPPVEKW	18.07	1136.67	9	0	379.897	43.36		29300000	Q5VYS8|TUT7_HUMAN			171.1	0.4	1
ISAIPEQRW	31.03	1098.58	9	0.5	550.299	48.14	898000	34500000	O94953|KDM4B_HUMAN			11.8	0.02	1
ISGHHPETW	44.02	1062.49	9	0.7	532.252	23.23		20400000	Q9Y385|UB2J1_HUMAN			41.9	0.125	1
ISGIKDFSW	31.99	1051.53	9	0.7	526.774	61.82	968000	10600000	P55884|EIF3B_HUMAN			23.9	0.06	1
ISGVHTVRF	33.09	1014.56	9	-0.1	508.288	33.28	35500000	36100000	Q2VIR3|IF2GL_HUMAN:P41091|IF2G_HUMAN			969.4	1.3	1
ISHDGTKLW	13.25	1055.54	9	0.5	352.854	43.91		9700000	Q04726|TLE3_HUMAN			32.4	0.1	1
ISKALVAYY	42.39	1026.58	9	0.3	514.295	47.06	224000000	300000000	P62249|RS16_HUMAN			90.1	0.25	1
ISKEEAM(+15.99)RW	35	1164.56	9	-0.8	583.287	26.49	4410000	162000000	P62913|RL11_HUMAN	Oxidation (M)	M7:Oxidation (M):1000.00	12.2	0.025	1
ISKEEAMRW	23.45	1148.56	9	0	383.862	35.42		41100000	P62913|RL11_HUMAN			10.6	0.02	1
ISKKDQIM(+15.99)Y	10.78	1140.58	9	-0.3	571.299	24.36		278000	O15381|NVL_HUMAN	Oxidation (M)	M8:Oxidation (M):1000.00	417.1	0.8	1
ISKKINTKF	34.59	1077.65	9	1.9	360.226	20.65	12300000	15100000	O00232|PSD12_HUMAN			93.5	0.3	1
ISKQFHHQL	55.44	1136.61	9	0.9	569.312	20.91	81000000	97500000	Q99613|EIF3C_HUMAN:B5ME19|EIFCL_HUMAN			391.1	0.7	1
ISKTHVYRF	29.31	1149.63	9	0.6	384.217	24.75	5880000	6800000	Q12830|BPTF_HUMAN			141.4	0.4	1
ISLLPKTSW	17.91	1043.6	9	0.4	522.808	62.13		2420000	P49914|MTHFS_HUMAN			6.6	0.01	1
ISM(+15.99)DPKVGW	21	1047.51	9	-1.1	524.76	42.59		815000	Q96HA8|NTAQ1_HUMAN	Oxidation (M)	M3:Oxidation (M):1000.00	8.9	0.015	1
ISNKKEAKF	19.33	1063.6	9	-1.9	355.541	15.94	457000	317000	Q9UBU7|DBF4A_HUMAN			401.1	0.8	1
ISNPKTAEF	29.65	1005.51	9	-0.3	503.764	32.76	2560000	2840000	Q9NSD9|SYFB_HUMAN			619.2	1	1
ISNPTRHVY	28.6	1085.56	9	-0.3	362.861	23.3	2470000	1430000	Q04726|TLE3_HUMAN:Q04727|TLE4_HUMAN:Q04724|TLE1_HUMAN			133.2	0.4	1
ISPSRTEAL	27.83	972.524	9	-1.8	487.268	29.89	12500000	14500000	P01920|DQB1_HUMAN:P05538|DQB2_HUMAN			16605.4	16	0
ISRAVVLVF	16.68	1002.62	9	-0.4	502.318	60.62	2300000	3080000	Q6NUK4|REEP3_HUMAN			54.9	0.175	1
ISRLYVPLY	26.13	1122.64	9	0.8	562.33	60.86	8180000	11100000	O95071|UBR5_HUMAN			539.6	0.9	1
ISRPIVNLF	23.88	1057.63	9	-1.3	529.821	61.38	8970000	20100000	Q9HCJ1|ANKH_HUMAN			17	0.04	1
ISRPNPPNF	33.24	1040.54	9	-0.7	521.277	41.53	7180000	7030000	Q8NEZ4|KMT2C_HUMAN			635.6	1	1
ISRPVPVRF	20.5	1069.64	9	-0.9	357.553	37.23	290000	2140000	Q7Z333|SETX_HUMAN			30.6	0.09	1
ISRSTNSNF	35.37	1024.49	9	-1.1	513.254	24.12	15700000	18800000	Q9Y232|CDYL_HUMAN			1067.2	1.4	1
ISSTVQRQL	34.74	1030.58	9	2.5	516.297	29.79	6600000	7660000	Q6PJF5|RHDF2_HUMAN			302	0.6	1
ISTPVIRTF	32.13	1032.6	9	0.2	517.306	51.75	173000000	222000000	Q9NZB2|F120A_HUMAN			37	0.125	1
ISVAEVEKW	33.81	1059.56	9	-0.5	530.787	56.89	455000	9280000	Q99707|METH_HUMAN			10	0.015	1
ISVPIFKQF	39.83	1077.62	9	1.1	539.819	67.54	20400000	42600000	Q00341|VIGLN_HUMAN			44.5	0.15	1
ISVPPIQKW	17.78	1066.62	9	0.3	534.316	57.83		2270000	Q6ZS30|NBEL1_HUMAN			9.2	0.015	1
ISYDVVKRW	27.42	1164.63	9	0.5	389.217	46.86		1590000	Q9UBF2|COPG2_HUMAN			8.3	0.01	1
ITAGAHRLW	42.29	1023.56	9	1.6	512.789	35.59	17300000	379000000	O00767|ACOD_HUMAN			7.9	0.01	1
ITHIVNQNF	36.91	1084.57	9	-0.7	543.29	42.21	21600000	26400000	Q9NTJ3|SMC4_HUMAN			1034.2	1.4	1
ITIPKNM(+15.99)HW	14.64	1154.59	9	0	385.871	38.81		12100000	Q9NY35|CLDN1_HUMAN	Oxidation (M)	M7:Oxidation (M):1000.00	13.5	0.025	1
ITISGRM(+15.99)TF	11.29	1040.53	9	-0.4	521.273	41.58		1980000	O00154|BACH_HUMAN	Oxidation (M)	M7:Oxidation (M):1000.00	180.3	0.5	1
ITKDVVLQW	17.93	1100.62	9	0.2	551.319	57.38		7380000	O95819|M4K4_HUMAN:Q9UKE5|TNIK_HUMAN			20.6	0.05	1
ITKTEVETF	17.47	1066.55	9	-0.3	534.284	38.53	2870000	2210000	Q14573|ITPR3_HUMAN			484.1	0.8	1
ITKTQKVRF	21.87	1119.68	9	0.8	374.233	19.51	1530000	483000	O60287|NPA1P_HUMAN			622.3	1	1
ITKTVVENI	46.01	1015.59	9	-0.6	508.803	37.44	35300000	42100000	P57740|NU107_HUMAN			10132.8	9	0
ITLHCVDQI	10.26	1040.53	9	-0.4	521.273	41.58	1320000	1980000	Q9C0I1|MTMRC_HUMAN			5978.7	5.5	0
ITNHIHVRI	30.01	1101.64	9	-0.1	368.221	28.56	8110000	9150000	P49736|MCM2_HUMAN			1791.2	2	1
ITNKYQLVF	38.21	1124.62	9	-0.5	563.318	55.92	55400000	74700000	Q9NYV6|RRN3_HUMAN			313.2	0.6	1
ITRNLKLRF	33.69	1159.72	9	-2.5	387.579	34.26	41000000	54500000	Q53G44|IF44L_HUMAN			119.4	0.4	1
ITRQKQLFY	31.41	1195.67	9	1.4	399.565	32.05	14600000	16300000	Q9UBU8|MO4L1_HUMAN			744.9	1.1	1
ITTDVLYTI	33.5	1037.56	9	-0.6	519.789	72.05	4540000	6480000	P14866|HNRPL_HUMAN			1716.8	1.9	1
ITTKAISRW	43.34	1074.62	9	-1.2	538.316	33.26	36300000	822000000	P49368|TCPG_HUMAN			11.7	0.02	1
ITTSLTTKW	32.35	1049.58	9	1.3	525.796	47.84		1510000	Q9NYU2|UGGG1_HUMAN			9.4	0.015	1
ITTTINPRF	30.23	1061.59	9	0.1	531.801	45.75	331000000	409000000	P26010|ITB7_HUMAN			296.3	0.6	1
ITTVIQHVF	38.8	1056.6	9	0.7	529.306	54.77	40000000	51300000	Q9H3R5|CENPH_HUMAN			44.6	0.15	1
ITTVVVQTF	22.67	1006.57	9	0.5	504.292	61.27	5120000	5990000	Q9Y6B7|AP4B1_HUMAN			147.3	0.4	1
ITVVSEKQF	26.16	1049.58	9	-1.3	525.794	42.68	2600000	3780000	Q6P5R6|RL22L_HUMAN			56.4	0.175	1
ITYDKLNKW	38.71	1179.63	9	-0.1	394.217	41.22		57700000	P05120|PAI2_HUMAN			17.7	0.04	1
ITYQHIDRW	28.37	1230.61	9	-0.3	616.314	40.86	1070000	34600000	Q9UBQ5|EIF3K_HUMAN			22.2	0.06	1
ITYTFHSTW	23.36	1154.54	9	0.9	578.278	56.24		1820000	P46977|STT3A_HUMAN			5.1	0.01	1
IVKSKQHSW	13.87	1111.61	9	-0.9	371.545	17.13		619000	Q9NWQ4|GPT2L_HUMAN			47.5	0.15	1
IVRKDRHLW	16.69	1221.71	9	0.3	408.244	21.09		2210000	Q8IZT6|ASPM_HUMAN			16.3	0.04	1
K(+42.01)GALLSVGW	10.88	971.544	9	-0.4	486.779	54.66		1220000	Q9NRG9|AAAS_HUMAN	Acetylation (N-term)	K1:Acetylation (N-term):1000.00	91.1	0.25	1
KAAELFSQW	12.2	1078.54	9	-0.8	540.279	58.52		861000	Q6P179|ERAP2_HUMAN			18.4	0.04	1
KAALLNQHY	42.81	1056.57	9	-0.8	529.293	26.88	4210000	4440000	P07814|SYEP_HUMAN			552.4	0.9	1
KAAPRSQHW	17.04	1079.56	9	0.1	360.861	16.63		1740000	Q92917|GPKOW_HUMAN			15.7	0.04	1
KAASLKSNY	13.4	980.529	9	0.2	491.272	18.12	67800	150000	P36578|RL4_HUMAN			3262.7	3.5	0
KAASVRPVL	26.75	939.587	9	-0.2	470.8	24.7	5570000	7060000	Q9H269|VPS16_HUMAN			1955.9	2.5	0
KAAVM(+15.99)VHQL	32.88	1011.55	9	0.2	506.784	23.24	2340000	2590000	P35222|CTNB1_HUMAN	Oxidation (M)	M5:Oxidation (M):1000.00	2459.6	2.5	0
KAEYLLR(+.98)EW	12.58	1207.62	9	0	604.819	45.38		1860000	A5YKK6|CNOT1_HUMAN	Citrullination	R7:Citrullination:1000.00	21.7	0.05	1
KAFDRPSLF	24.07	1079.58	9	-1.8	540.794	46.52	797000	2480000	Q8TBZ8|ZN564_HUMAN			210.6	0.5	1
KAFQATLRW	20.92	1119.62	9	1.6	374.214	45.16	1370000	1250000	Q6PJG6|BRAT1_HUMAN			5.9	0.01	1
KAFTHTAQY	14.65	1065.52	9	0.5	533.77	21.14	489000	760000	P31939|PUR9_HUMAN			68	0.2	1
KAFTHYSTY	28.04	1116.52	9	-2	559.268	27.53		725000	Q14592|ZN460_HUMAN			300	0.6	1
KAGIIQDTW	29.32	1030.54	9	0.3	516.28	47.41		9680000	Q9P2E9|RRBP1_HUMAN			15.9	0.04	1
KAGPGLKRW	22.69	1011.6	9	-2.4	338.206	20.1		6420000	Q96N66|MBOA7_HUMAN			15.8	0.04	1
KAGQTVTIW	21.17	1002.55	9	0.6	502.283	44.41		15000000	P20700|LMNB1_HUMAN			21.1	0.05	1
KAGQVVTIW	35.51	1000.57	9	-0.6	501.292	50.52	14800000	230000000	P02545|LMNA_HUMAN			17.4	0.04	1
KAIATTVTY	34.69	966.539	9	0.4	484.277	33.19	14500000	15800000	O43808|PM34_HUMAN			69.8	0.2	1
KAIEENNNF	38.15	1077.51	9	-0.1	539.762	28.42	2560000	2830000	P16949|STMN1_HUMAN:Q9H169|STMN4_HUMAN			850.4	1.2	1
KAIEKNVLF	49.89	1060.63	9	-0.4	531.321	35.6	81300000	100000000	P10644|KAP0_HUMAN			165.2	0.4	1
KAIETQPNF	45.83	1046.54	9	0.2	524.277	35.69	10600000	10800000	O15294|OGT1_HUMAN			564.3	0.9	1
KAIKELEEW	11.07	1144.61	9	0.1	573.314	39.9		713000	P09496|CLCA_HUMAN			16.3	0.04	1
KAINPINTF	31.33	1016.57	9	-0.9	509.289	45.76	21000000	69300000	Q07960|RHG01_HUMAN			80.2	0.25	1
KAISKNVLF	11.97	1018.62	9	0.2	510.316	34.12		772000	P31321|KAP1_HUMAN			132.3	0.4	1
KAISPSEGW	32.58	973.487	9	-1.2	487.75	36.5		3990000	Q9HAK2|COE2_HUMAN:Q9UH73|COE1_HUMAN:Q9H4W6|COE3_HUMAN			18.4	0.04	1
KAKAKTYEF	43.45	1084.59	9	0.1	543.303	19.57	6720000	5250000	Q9HC52|CBX8_HUMAN			160.9	0.4	1
KAKDLILRF	27.66	1102.69	9	-0.6	368.569	40.31	12500000	41300000	Q9Y2H1|ST38L_HUMAN:Q15208|STK38_HUMAN			506.8	0.9	1
KAKDLLALF	11.57	1017.62	9	-0.4	509.818	60.91		1510000	Q9H501|ESF1_HUMAN			221	0.5	1
KAKEIYM(+15.99)TF	26.42	1145.58	9	-1.2	573.796	33.44	9300000	7660000	O43665|RGS10_HUMAN	Oxidation (M)	M7:Oxidation (M):1000.00	225.8	0.5	1
KAKEVFQRF	18.82	1151.64	9	-8.8	384.886	26.02	4380000	2970000	Q6ZN66|GBP6_HUMAN			438.1	0.8	1
KAKKEIEKF	35.69	1119.67	9	0.8	374.229	16.16	5740000	4630000	Q9UHW5|GPN3_HUMAN			282.2	0.6	1
KAKPVTTNL	44.09	970.581	9	-0.5	486.298	20.1	14200000	19900000	Q8N0T1|CH059_HUMAN			2266.9	2.5	0
KAKQLTPRI	18.06	1053.67	9	0.7	352.229	20.82	1520000	1440000	Q86UX7|URP2_HUMAN			5043	4.5	0
KAKREVSSW	26.33	1089.59	9	1.2	545.804	17.54		18600000	P53582|MAP11_HUMAN			10.5	0.015	1
KAKTIQQTL	22.71	1029.62	9	0.4	515.817	22.38	691000	1930000	Q9NQT5|EXOS3_HUMAN			466	0.8	1
KAKTNVKLW	39.87	1086.65	9	-0.5	544.335	23.92		175000000	P10644|KAP0_HUMAN			9.7	0.015	1
KAKVTGDEW	46.78	1032.52	9	0.4	517.269	21.97		36200000	P13807|GYS1_HUMAN			36.3	0.125	1
KAKVVVELI	20.45	997.654	9	0.2	499.834	39.06	4360000	3420000	Q9BSI4|TINF2_HUMAN			1632.5	1.8	1
KALDDKNC(+119.00)W	25.39	1210.51	9	-0.9	404.511	25.98		11500000	P53621|COPA_HUMAN	Cysteinylation	C8:Cysteinylation:1000.00	10.5	0.015	1
KALDNTPEF	13.68	1033.51	9	-0.3	517.761	38.99	262000	76600	Q86UL3|GPAT4_HUMAN			910.9	1.3	1
KALDQFVNF	10.68	1080.56	9	0.3	541.288	60.51		640000	Q9UQE7|SMC3_HUMAN			3540.4	3.5	0
KALEENNNF	38.15	1077.51	9	-0.1	539.762	28.42	2560000	2830000	Q93045|STMN2_HUMAN:Q9NZ72|STMN3_HUMAN			424.7	0.8	1
KALELERKL	39.8	1098.68	9	1.6	367.233	27.17	31400000	40900000	Q9BWW8|APOL6_HUMAN			189	0.5	1
KALESIKEF	37.33	1063.59	9	0.2	532.803	35.18	6190000	9230000	Q92547|TOPB1_HUMAN			78.8	0.25	1
KALEVFPEF	35.59	1078.57	9	1	540.293	65.41	22700000	35400000	O15294|OGT1_HUMAN			346.1	0.7	1
KALEYVFKF	12.97	1143.63	9	-0.2	572.823	58.13	682000	1160000	Q92608|DOCK2_HUMAN			39.5	0.125	1
KALIYQKKY	34.21	1153.69	9	-0.2	385.569	21.67	4510000	5010000	Q99996|AKAP9_HUMAN:O95613|PCNT_HUMAN			67.2	0.2	1
KALKQRPRF	11.89	1142.7	9	-0.4	381.908	16.76	1120000	513000	O14647|CHD2_HUMAN			123.9	0.4	1
KALQDGRAY	28.27	1020.54	9	-1.8	341.185	19.47	704000	1470000	A5YKK6|CNOT1_HUMAN			645.8	1	1
KALSM(+15.99)PEKW	32.7	1104.56	9	0.2	553.289	28.36		11000000	Q9Y3I1|FBX7_HUMAN	Oxidation (M)	M5:Oxidation (M):1000.00	10.9	0.02	1
KALSMPEKW	34.64	1088.57	9	0.8	545.292	39.75		2480000	Q9Y3I1|FBX7_HUMAN			8.8	0.01	1
KAM(+15.99)ADFTTW	10.51	1085.49	9	0.7	543.75	47.41		496000	Q9NU22|MDN1_HUMAN	Oxidation (M)	M3:Oxidation (M):1000.00	9.9	0.015	1
KAM(+15.99)ELIREL	34.78	1117.62	9	-0.8	559.815	36.94	44700000	48300000	Q14691|PSF1_HUMAN	Oxidation (M)	M3:Oxidation (M):1000.00	858.7	1.2	1
KAM(+15.99)GIM(+15.99)NSF	24.48	1029.46	9	-0.7	515.738	30.45	10300000	12300000	P06899|H2B1J_HUMAN:O60814|H2B1K_HUMAN:Q99880|H2B1L_HUMAN:Q8N257|H2B3B_HUMAN	Oxidation (M)	M3:Oxidation (M):1000.00;M6:Oxidation (M):1000.00	2180.5	2.5	0
KAM(+15.99)GIMNSF	17.53	1013.47	9	-0.6	507.741	42.91	0	478000	P06899|H2B1J_HUMAN:O60814|H2B1K_HUMAN:Q99880|H2B1L_HUMAN:Q8N257|H2B3B_HUMAN	Oxidation (M)	M3:Oxidation (M):12.33	99.2	0.3	1
KAM(+15.99)TGVEQW	30.83	1064.5	9	-0.6	533.255	31.79		34100000	P49368|TCPG_HUMAN	Oxidation (M)	M3:Oxidation (M):1000.00	10.4	0.015	1
KAMELIREL	21.82	1101.62	9	0.4	551.818	46.06	0	6600000	Q14691|PSF1_HUMAN			593.6	1	1
KAMTGVEQW	27.35	1048.5	9	-1.3	525.257	39.23		8280000	P49368|TCPG_HUMAN			15.1	0.03	1
KANDLDVRW	22.95	1115.57	9	-4.7	558.791	40.24		1350000	P19484|TFEB_HUMAN			33.9	0.1	1
KAPSAARSL	19.84	899.519	9	0.9	450.767	18.93	3010000	3780000	Q9UQN3|CHM2B_HUMAN			5304.7	5	0
KAPVTVTSL	30.72	914.544	9	-2.5	458.278	37.35	2290000	2730000	P51610|HCFC1_HUMAN			5182.2	4.5	0
KARDINAVL	15.71	998.587	9	2.4	333.87	29.28	2870000	1910000	P55265|DSRAD_HUMAN			1454.3	1.7	1
KARHEVLLI	15.89	1077.67	9	0.5	360.229	28.95	501000	538000	Q00341|VIGLN_HUMAN			986.1	1.3	1
KARIQEAVY	34.86	1076.6	9	-1.4	539.305	25.1	42400000	50200000	Q8TEM1|PO210_HUMAN			209.5	0.5	1
KARLEVHRF	21.5	1154.67	9	0.3	385.897	20.85	2130000	3200000	Q8NDD1|CA131_HUMAN			58.9	0.175	1
KARLPLRLF	23.93	1112.72	9	0.3	371.913	44.23	12000000	26700000	O00767|ACOD_HUMAN			60.8	0.175	1
KARNLQAQY	12.52	1090.59	9	0.5	364.537	20.72	332000	122000	Q9H267|VP33B_HUMAN			58.7	0.175	1
KARPDLERI	14.6	1096.64	9	0.4	366.553	23.26	15600000	22600000	Q6SPF0|SAMD1_HUMAN			537.3	0.9	1
KARQLTVQM(+15.99)	20.54	1089.6	9	-0.6	545.805	18.75	6280000	9680000	P55209|NP1L1_HUMAN	Oxidation (M)	M9:Oxidation (M):1000.00	3103.8	3	0
KARVIVIRW	19.15	1139.73	9	0.3	380.917	37.84		1040000	Q6GYQ0|RGPA1_HUMAN			6.6	0.01	1
KARYTVRSF	37.05	1126.62	9	-0.3	376.549	23.56	3730000	4770000	P62913|RL11_HUMAN			122.2	0.4	1
KASENAIVW	11.99	1016.53	9	-1.2	509.271	43.15		6250000	Q96CW1|AP2M1_HUMAN			20.8	0.05	1
KASGTLREY	38.91	1023.53	9	0.2	512.775	20.17	93900000	114000000	Q02543|RL18A_HUMAN			338.9	0.7	1
KASPTQNLF	47.69	1004.53	9	-1	503.271	37.99	23500000	29200000	P05120|PAI2_HUMAN			21.4	0.05	1
KATDILPKW	30.01	1070.61	9	0.4	536.314	49.59		10200000	Q12931|TRAP1_HUMAN			23.6	0.06	1
KATNVVRLL	19.28	1012.64	9	0	507.327	34.94		216000	Q9NYU1|UGGG2_HUMAN			716.2	1.1	1
KATPIKLIW	30.14	1068.67	9	1	535.343	51.52		4650000	P49685|GPR15_HUMAN			8.5	0.01	1
KAVFLVPKW	31.08	1086.66	9	0.5	544.337	54.77		4360000	Q9H2M9|RBGPR_HUMAN			11.7	0.02	1
KAVSLQRKL	39.1	1041.67	9	0.1	348.229	20.72	20400000	24600000	Q14966|ZN638_HUMAN			326.7	0.7	1
KAVTHQVKF	42.75	1056.61	9	1.4	353.21	18.81	1730000	897000	Q8WU90|ZC3HF_HUMAN			148.2	0.4	1
KAVYGRTFT	13.44	1041.56	9	-1.1	521.787	29.5		5430000	Q8N1T3|MYO1H_HUMAN			14455.9	14	0
KAYEIEKRL	36.24	1148.66	9	1.9	383.893	25.36	10400000	12500000	Q9UPP1|PHF8_HUMAN			115.5	0.3	1
KAYGASKTF	43.11	971.508	9	-1.2	486.76	20.03	846000	1250000	P27694|RFA1_HUMAN			32.5	0.1	1
KAYPKRPLL	45.35	1084.68	9	0.2	362.566	22.43	62700000	93000000	Q9GZR7|DDX24_HUMAN			460.2	0.8	1
KAYSEAHEI	46.33	1046.5	9	-0.1	524.259	21.87	2770000	3670000	P61981|1433G_HUMAN			571.3	0.9	1
KGHQVPVVW	12.23	1048.58	9	0.1	525.298	36.53		781000	Q86UX2|ITIH5_HUMAN			91.2	0.25	1
KGKNISSHW	30.33	1055.55	9	-0.4	528.783	18.55		8470000	Q96TA2|YMEL1_HUMAN			116.7	0.3	1
KGKPIRIM(+15.99)W	17.87	1143.66	9	-1.3	382.226	29.79		32100000	Q13310|PABP4_HUMAN	Oxidation (M)	M8:Oxidation (M):1000.00	46.2	0.15	1
KGKPIRIMW	12.91	1127.66	9	-0.4	376.895	33.94		5140000	Q13310|PABP4_HUMAN			40.1	0.125	1
KGKPVRIM(+15.99)W	30.22	1129.64	9	1.2	377.555	26.24	7300000	188000000	Q9H361|PABP3_HUMAN:P11940|PABP1_HUMAN	Oxidation (M)	M8:Oxidation (M):1000.00	49.3	0.15	1
KGKPVRIMW	30.22	1113.65	9	-1.7	372.223	29.28		43500000	Q9H361|PABP3_HUMAN:P11940|PABP1_HUMAN			43.7	0.15	1
KGRGVTFLF	11.27	1023.59	9	-1.9	512.8	49.38		2250000	Q9NR30|DDX21_HUMAN			370.3	0.7	1
KGRTEILKW	13.27	1129.66	9	0.8	565.838	31.02		26900000	Q96TA2|YMEL1_HUMAN			34.3	0.1	1
KGYDGVKRW	27.8	1107.58	9	-0.8	370.201	23.49		8420000	Q9H4L4|SENP3_HUMAN			132.6	0.4	1
KGYNGVKRW	32.01	1106.6	9	-1.7	369.873	20		3040000	Q96HI0|SENP5_HUMAN			54.4	0.175	1
KIIPKTLTW	29.51	1098.68	9	0.1	550.347	45.44	0	17400000	O60449|LY75_HUMAN			62.8	0.2	1
KIKDFASHF	34.99	1091.58	9	1.5	364.867	32.28	4390000	818000	Q8ND82|Z280C_HUMAN			11448.8	10	0
KIKPVSLTF	29.32	1031.64	9	1	516.827	43.01	3180000	4530000	O60449|LY75_HUMAN			1680	1.9	1
KIKYPENFF	35.4	1184.62	9	-1.7	593.318	49.57	8730000	20900000	P36873|PP1G_HUMAN:P62140|PP1B_HUMAN:P62136|PP1A_HUMAN			7857	7	0
KILPFSPEF	24.81	1076.59	9	0.5	539.303	69.39	770000	1180000	Q13395|TARB1_HUMAN			1179.4	1.5	1
KIRNFVVVF	12.2	1120.68	9	-0.2	561.345	54.41		8440000	Q9BYX4|IFIH1_HUMAN			2562.3	2.5	0
KISNIIKQF	29.62	1089.65	9	0.5	545.835	42.19	10400000	16900000	Q7L523|RRAGA_HUMAN:Q5VZM2|RRAGB_HUMAN			960.5	1.3	1
KISVRTVTI	11.01	1015.64	9	1.5	339.554	32.7	6560000	3310000	Q9HC07|TM165_HUMAN			10300.3	9	0
KKALKM(+15.99)TIF	10.34	1094.65	9	1	548.334	26.24		369000	Q96KA5|CLP1L_HUMAN	Oxidation (M)	M6:Oxidation (M):1000.00	377.6	0.7	1
KLKDIRNAW	25.92	1142.66	9	-0.1	381.893	30.67		128000000	Q9UKD2|MRT4_HUMAN			2396.4	2.5	0
KLKPILTKY	22.44	1102.71	9	-1.6	368.577	28.87	5500000	1470000	P08473|NEP_HUMAN			3312	3.5	0
KLKPLLEKW	43.44	1153.72	9	-0.8	577.868	37.14		47900000	P09086|PO2F2_HUMAN:P14859|PO2F1_HUMAN:Q9UKI9|PO2F3_HUMAN			87.4	0.25	1
KLKPLLNKW	24.37	1138.72	9	-1.3	380.581	33.49		1730000	P20264|PO3F3_HUMAN:Q03052|PO3F1_HUMAN:P20265|PO3F2_HUMAN:P49335|PO3F4_HUMAN			62.7	0.2	1
KLKTVKENW	19.11	1144.66	9	0	382.561	21.4		6690000	Q00059|TFAM_HUMAN			1478.1	1.7	1
KLMKAFESL	16.6	1065.59	9	0	533.802	29.49	497000	286000	P42858|HD_HUMAN			14196.6	13	0
KLQAQDPQI	15.28	1039.57	9	0.1	520.79	34.23	409000	498000	Q9C0G6|DYH6_HUMAN			18382.7	19	0
KLQEKARKW	21.43	1185.7	9	-1.2	396.24	17.27		1330000	Q6P2Q9|PRP8_HUMAN			821.6	1.2	1
KLRAEEQTW	10.4	1159.6	9	-0.2	387.54	27.03		1520000	Q9H3C7|GGNB2_HUMAN			41.4	0.125	1
KLSDIVIQW	10.69	1100.62	9	0.6	551.319	57.81		3880000	Q7Z7D3|VTCN1_HUMAN			660.2	1	1
KPNYSLNLW	16.39	1133.59	9	-1.6	567.8	51.84	74500	7560000	P22059|OSBP1_HUMAN:Q969R2|OSBP2_HUMAN			968.3	1.3	1
KPPSKR(+.98)LTF	12.29	1073.62	9	2.6	537.82	28.76	5340000	3130000	Q8IWU4|ZNT8_HUMAN	Citrullination	R6:Citrullination:1000.00	4592.5	4	0
KR(+.98)LGADWKL	11.25	1086.62	9	-1.6	363.213	34.13	8710000	1130000	P41225|SOX3_HUMAN	Citrullination	R2:Citrullination:1000.00	532.4	0.9	1
KSAAHLGKW	27.59	996.551	9	0	333.191	19.42		1480000	Q9NV64|TM39A_HUMAN			13.7	0.03	1
KSAAKESLY	37.02	995.529	9	0.7	498.772	20.7	4280000	5160000	Q12772|SRBP2_HUMAN			145.9	0.4	1
KSAEIRRSL	14.94	1058.62	9	1.2	353.881	19.41	680000	799000	Q7RTP6|MICA3_HUMAN			409.3	0.8	1
KSAEIYPIM(+15.99)	30.27	1066.54	9	1	534.276	38.98	10400000	11000000	P29466|CASP1_HUMAN	Oxidation (M)	M9:Oxidation (M):1000.00	733.1	1.1	1
KSAFVRTQW	18.6	1121.6	9	-0.3	561.806	34.62		4040000	Q9UKY1|ZHX1_HUMAN			6.2	0.01	1
KSAKNPERW	10.55	1114.59	9	0.8	372.537	17.37		319000	Q96P70|IPO9_HUMAN			14.2	0.03	1
KSAQPADGW	35.75	958.451	9	0.2	480.233	27.03		5070000	P30793|GCH1_HUMAN			41.8	0.125	1
KSAQPIEKF	47.1	1046.58	9	-1.7	524.294	24.82	18100000	21400000	Q00534|CDK6_HUMAN			164	0.4	1
KSARKIDAF	41.5	1034.59	9	0.2	518.301	20.22	8640000	5620000	P42345|MTOR_HUMAN			1246.2	1.5	1
KSC(+119.00)STFEQW	17.13	1233.48	9	-0.2	617.747	40.47		2300000	P51532|SMCA4_HUMAN:P51531|SMCA2_HUMAN	Cysteinylation	C3:Cysteinylation:1000.00	24.1	0.06	1
KSDLVNWFK	12.51	1135.6	9	1.1	379.542	43.81		5570000	O43847|NRDC_HUMAN			14494.7	14	0
KSFADINLY	33.97	1069.54	9	1	535.78	57.09	22800000	31500000	P01111|RASN_HUMAN			12	0.025	1
KSFDNIKNW	32.97	1150.58	9	0	576.296	38.99		4230000	Q92930|RAB8B_HUMAN			11.5	0.02	1
KSFDNIRNW	33.32	1178.58	9	0.9	590.299	40.4	345000	21700000	P61006|RAB8A_HUMAN			14	0.03	1
KSFEDIHHY	20.26	1174.54	9	0.9	392.521	25.71	2540000	780000	P01116|RASK_HUMAN			23.4	0.06	1
KSFENISKW	44.08	1137.58	9	-0.5	569.798	38.68	5660000	116000000	P61026|RAB10_HUMAN			5.4	0.01	1
KSFGGSHVM(+15.99)	17.24	964.444	9	-2.9	483.228	16.94	135000	282000	C9J798|RAS4B_HUMAN:O43374|RASL2_HUMAN	Oxidation (M)	M9:Oxidation (M):1000.00	316.8	0.6	1
KSFGSAQEF	35.14	999.466	9	0	500.74	35.5	6480000	8370000	P35606|COPB2_HUMAN			39.5	0.125	1
KSFKKKFFY	36.13	1221.69	9	-1.8	611.852	24.55	16200000	20400000	Q8N1G2|CMTR1_HUMAN			71.3	0.25	1
KSFKKRYTF	15.34	1203.68	9	0.6	402.233	19.28	331000	573000	Q9H4Z2|ZN335_HUMAN			12.5	0.025	1
KSFNRHLHF	15.76	1184.62	9	0.8	395.881	22.75	3210000	1850000	P06737|PYGL_HUMAN:P11216|PYGB_HUMAN			40.6	0.125	1
KSFPGGKEY	31.65	1011.5	9	-0.7	506.758	21.54	5310000	6840000	Q9BXS5|AP1M1_HUMAN:Q9Y6Q5|AP1M2_HUMAN			56.8	0.175	1
KSFPKGDIW	20.59	1076.57	9	1.2	539.291	38.18		4300000	Q9H583|HEAT1_HUMAN			9.2	0.015	1
KSFQAIHQF	42.41	1104.57	9	-0.8	553.293	33.53	16300000	21300000	Q6IPU0|CENPP_HUMAN			9.3	0.015	1
KSFVKVYNY	61.47	1146.61	9	0.5	574.311	36.72	484000000	625000000	P61353|RL27_HUMAN			81.2	0.25	1
KSFVTKRSL	29.83	1064.63	9	1.1	355.886	21.2	3190000	4070000	O95625|ZBT11_HUMAN			55.9	0.175	1
KSFYDARLL	14.6	1111.6	9	-0.6	556.808	47.21	2760000	6380000	Q86V97|KBTB6_HUMAN:Q8WVZ9|KBTB7_HUMAN			85.2	0.25	1
KSGAIIEKW	28.3	1030.58	9	0.1	516.298	32.2		3640000	Q67FW5|B3GNL_HUMAN			6.2	0.01	1
KSGELLATW	13.49	1003.53	9	1.4	502.775	53.11		2160000	Q9H0K1|SIK2_HUMAN			8.2	0.01	1
KSGEPLSTW	17.26	1003.5	9	-1.4	502.755	40.37		1110000	P57059|SIK1_HUMAN			21.7	0.05	1
KSGSPVATF	28.07	892.465	9	-0.2	447.24	32.59	1730000	1850000	Q9BQ67|GRWD1_HUMAN			205.6	0.5	1
KSGSVQEQW	33.86	1047.5	9	-0.4	524.756	28.3		19200000	Q9NXF1|TEX10_HUMAN			9.5	0.015	1
KSGVNRVVW	10.39	1043.59	9	0.7	522.802	29.28		634000	O15297|PPM1D_HUMAN			16.9	0.04	1
KSHFRNHKF	19.37	1199.63	9	0	400.884	16.65	4150000	3580000	Q5JTD0|TJAP1_HUMAN			128.2	0.4	1
KSHTVVIGF	27.72	986.555	9	-1	494.284	37.05	3480000	4240000	Q8NG31|KNL1_HUMAN			239.5	0.6	1
KSIDC(+119.00)IRAF	17.12	1170.55	9	-2.1	391.191	36.68	351000	340000	P13010|XRCC5_HUMAN	Cysteinylation	C5:Cysteinylation:1000.00	952.1	1.3	1
KSIDLIQKW	39.02	1129.65	9	0.4	565.832	47.73	1740000	47500000	P49585|PCY1A_HUMAN			11.9	0.02	1
KSIDLKDKY	23.25	1108.61	9	0.1	370.545	23.66		1320000	P10809|CH60_HUMAN			1535.2	1.8	1
KSIELFYKF	23.42	1173.64	9	0.5	587.829	57.11		2270000	P78527|PRKDC_HUMAN			48.3	0.15	1
KSIHIVVTM	38.53	1026.59	9	-0.1	514.302	39.25	4200000	4150000	Q13291|SLAF1_HUMAN			121.9	0.4	1
KSIHIVVTM(+15.99)	54.44	1042.58	9	1.3	522.3	28.04	92500000	118000000	Q13291|SLAF1_HUMAN	Oxidation (M)	M9:Oxidation (M):1000.00	1205.1	1.5	1
KSINIIKKY	22.76	1105.69	9	0.7	369.57	23.69	1070000	1830000	P49642|PRI1_HUMAN			35.1	0.1	1
KSIRNDIEW	27.17	1159.6	9	0.8	580.807	38.04	2430000	28300000	Q9NPA3|M1IP1_HUMAN			12	0.025	1
KSIVQEYVK	15	1092.62	9	0.5	365.213	40.57		3530000	Q13395|TARB1_HUMAN			5363.5	5	0
KSKAEVAC(+119.00)I	21	1066.52	9	1.8	534.266	20.7		360000	P78347|GTF2I_HUMAN:Q6EKJ0|GTD2B_HUMAN:Q86UP8|GTD2A_HUMAN	Cysteinylation	C8:Cysteinylation:1000.00	1004.1	1.3	1
KSKAIIEEY	42.16	1079.59	9	0.8	540.801	28.11	18200000	22900000	Q04637|IF4G1_HUMAN			139	0.4	1
KSKDFVQVM	20.19	1080.56	9	1	541.29	33.2	0	6480000	P78527|PRKDC_HUMAN			1276.6	1.6	1
KSKDFVQVM(+15.99)	51.72	1096.56	9	1.1	549.287	25.46	107000000	134000000	P78527|PRKDC_HUMAN	Oxidation (M)	M9:Oxidation (M):1000.00	1548.9	1.8	1
KSKDILVDL	22.57	1029.61	9	-0.5	515.811	42.15	7710000	14200000	Q9NPA3|M1IP1_HUMAN			3650.9	3.5	0
KSKDISKTF	41.49	1052.59	9	0.8	527.301	19.48	5890000	8090000	Q14651|PLSI_HUMAN			145.7	0.4	1
KSKDVIKTI	23.27	1030.64	9	-0.4	344.553	20.68		226000	P52306|GDS1_HUMAN			1464.9	1.7	1
KSKENPRNF	25.96	1118.58	9	1.4	373.869	16.86	650000	497000	P37802|TAGL2_HUMAN			1146.5	1.5	1
KSKFVLVKF	11.63	1094.69	9	0.2	365.902	38.45	717000	967000	P30040|ERP29_HUMAN			120.8	0.4	1
KSKGLANVF	37.31	962.555	9	2.6	482.286	32.28	12000000	14000000	Q03169|TNAP2_HUMAN			95.4	0.3	1
KSKGWVNTL	14.07	1031.58	9	-0.6	516.795	30.82		1750000	P14735|IDE_HUMAN			490	0.9	1
KSKHEEEEW	10.84	1200.54	9	-2.2	601.277	19.51		617000	P51946|CCNH_HUMAN			16.9	0.04	1
KSKILKQVI	33.1	1055.71	9	-0.5	528.86	24.17	16000000	13000000	P52701|MSH6_HUMAN			1668.7	1.9	1
KSKITHPVY	52.31	1071.61	9	-1	536.811	19.29	21200000	27400000	Q9UGP8|SEC63_HUMAN			426.2	0.8	1
KSKKISLKY	25.8	1093.69	9	-0.6	365.569	19.08	506000	446000	P46940|IQGA1_HUMAN			130	0.4	1
KSKLGFINW	10.79	1091.61	9	-0.1	546.814	54.25		1530000	Q6E0U4|DMKN_HUMAN			298.8	0.6	1
KSKLSQNNF	41.72	1064.56	9	2.7	533.289	21.17	12000000	7350000	Q9Y277|VDAC3_HUMAN			753.4	1.1	1
KSKLTRNNF	21.05	1106.62	9	0.3	554.317	18.6	14200000	9890000	P45880|VDAC2_HUMAN			1104.5	1.4	1
KSKNILFVI	40.03	1060.66	9	-0.3	531.339	52.4	163000000	230000000	O15069|NACAD_HUMAN:E9PAV3|NACAM_HUMAN:Q9BZK3|NACP4_HUMAN:Q13765|NACA_HUMAN:Q9H009|NACA2_HUMAN			520.1	0.9	1
KSKNILVRM(+15.99)	31.75	1103.65	9	0.6	368.89	18.79	7400000	8970000	O75394|RM33_HUMAN	Oxidation (M)	M9:Oxidation (M):1000.00	1542.7	1.8	1
KSKPDKQLI	17.54	1055.63	9	0.7	352.885	17.4	1640000	1470000	Q03933|HSF2_HUMAN			550.7	0.9	1
KSKPKNSVW	24.17	1072.6	9	0.7	537.309	17.43		1060000	Q92963|RIT1_HUMAN			15.7	0.04	1
KSKQSLIDW	27.15	1103.6	9	1.5	552.807	40.34		13100000	Q5VYK3|ECM29_HUMAN			40.4	0.125	1
KSKSIEITF	11.78	1051.59	9	-0.4	526.803	38.68		323000	Q9P2D6|F135A_HUMAN			73	0.25	1
KSKTLQEFL	18.98	1092.62	9	1.7	547.317	41.66	11000000	10700000	Q9NSI8|SAMN1_HUMAN			854.2	1.2	1
KSKVSEQRY	26.21	1123.6	9	-0.4	375.54	15.16	200000	269000	Q9HA38|ZMAT3_HUMAN			176.7	0.5	1
KSKYFESKF	41.54	1162.6	9	-0.2	388.541	27.56	18300000	22800000	P09326|CD48_HUMAN			142.8	0.4	1
KSKYQTDLY	18.14	1144.58	9	-0.1	573.295	27.72		1880000	Q8WUA2|PPIL4_HUMAN			2423.9	2.5	0
KSLAKLPEF	15.08	1031.6	9	0.9	516.808	42.25	894000	456000	Q6TFL4|KLH24_HUMAN			69.1	0.2	1
KSLALLLNY	25.4	1033.62	9	-0.4	517.816	63.3	4080000	6350000	Q9UBU8|MO4L1_HUMAN			84.1	0.25	1
KSLANKR(+.98)AF	18.79	1034.59	9	0	518.301	20.1	1740000	738000	O60293|ZC3H1_HUMAN	Citrullination	R7:Citrullination:1000.00	91.3	0.25	1
KSLDTTLQF	16.05	1051.55	9	-1.4	526.784	52.66	1610000	1190000	P15498|VAV_HUMAN			69.9	0.2	1
KSLEEIYLF	27.89	1140.61	9	1.6	571.312	68.84	26200000	55300000	P15880|RS2_HUMAN			9.6	0.015	1
KSLELHEEF	20.1	1130.56	9	-0.9	566.287	37.23	732000	1620000	P53367|ARFP1_HUMAN			61.7	0.2	1
KSLENAIEW	12.75	1088.55	9	0	545.282	54.41		13400000	Q9Y570|PPME1_HUMAN			10.1	0.015	1
KSLENQTYF	17.82	1128.55	9	-2.6	565.278	42.34	2190000	4560000	Q99996|AKAP9_HUMAN			22.1	0.06	1
KSLGADFTF	16.3	984.492	9	0.5	493.253	56.49	332000	1110000	Q96T76|MMS19_HUMAN			14.7	0.03	1
KSLGVTTKF	51.25	979.57	9	-0.5	490.792	31.16	19600000	22900000	Q5VWZ2|LYPL1_HUMAN			17.1	0.04	1
KSLIEKNSW	12.68	1103.6	9	-0.7	368.873	32.43		685000	Q96CP6|ASTRA_HUMAN:Q8IYS0|ASTRC_HUMAN			5.6	0.01	1
KSLILTRAF	19.45	1047.64	9	0.9	524.83	43.71	1510000	619000	Q8IWI9|MGAP_HUMAN			69.5	0.2	1
KSLM(+15.99)IKREL	14.61	1132.66	9	-0.7	378.562	22.74	2700000	2040000	Q13601|KRR1_HUMAN	Oxidation (M)	M4:Oxidation (M):1000.00	481	0.8	1
KSLPASITM(+15.99)	20.58	962.511	9	-0.5	482.262	30.76	287000	176000	Q9BZ95|NSD3_HUMAN	Oxidation (M)	M9:Oxidation (M):1000.00	363.5	0.7	1
KSLPASLSF	20.18	948.528	9	0.4	475.272	51.52	1020000	1470000	Q14160|SCRIB_HUMAN			12	0.025	1
KSLPDTELM(+15.99)	33.84	1048.51	9	1.7	525.264	33.49	10400000	12900000	P46013|KI67_HUMAN	Oxidation (M)	M9:Oxidation (M):1000.00	382.9	0.7	1
KSLWKHHEY	23.53	1226.62	9	-0.1	409.88	19.81		360000	P28288|ABCD3_HUMAN			171.5	0.4	1
KSLYHSVEW	33.04	1147.57	9	-1	574.79	39.43		3190000	Q8NBJ5|GT251_HUMAN			10.6	0.02	1
KSM(+15.99)AERAAI	11.59	991.512	9	1.6	496.764	18.54		517000	O75175|CNOT3_HUMAN	Oxidation (M)	M3:Oxidation (M):1000.00	517.7	0.9	1
KSM(+15.99)ETKVQF	43.09	1112.55	9	-0.2	557.284	23.88	27100000	30200000	Q15782|CH3L2_HUMAN	Oxidation (M)	M3:Oxidation (M):1000.00	54.9	0.175	1
KSM(+15.99)KVVKLF	32.42	1094.65	9	-0.4	365.891	26.67	17100000	18000000	Q9Y291|RT33_HUMAN	Oxidation (M)	M3:Oxidation (M):1000.00	42.7	0.125	1
KSMAERAAI	11.35	975.517	9	-0.3	488.766	21.92		304000	O75175|CNOT3_HUMAN			702.2	1.1	1
KSMETKVQF	34.88	1096.56	9	-0.2	549.287	29.13	26500000	7060000	Q15782|CH3L2_HUMAN			41.8	0.125	1
KSNDGDFTF	10.72	1029.44	9	-1.7	515.727	42.82		299000	P49792|RBP2_HUMAN			1120.3	1.4	1
KSNNVEM(+15.99)DW	13.03	1137.48	9	-1.4	569.745	32.38		734000	P31943|HNRH1_HUMAN	Oxidation (M)	M7:Oxidation (M):1000.00	11.7	0.02	1
KSNPKNDSW	16.34	1074.51	9	2.5	538.263	17.31		409000	Q96PP9|GBP4_HUMAN			25.3	0.07	1
KSQDLELSW	26.38	1104.55	9	-0.2	553.28	55.62	3930000	31100000	P06734|FCER2_HUMAN			16.7	0.04	1
KSRDYEREI	29.16	1194.6	9	0.6	598.307	21.22	154000000	193000000	Q9NRZ9|HELLS_HUMAN			3434.3	3.5	0
KSREEDPTL	21.6	1073.54	9	-0.8	537.774	21.44	3120000	4740000	Q9NWQ8|PHAG1_HUMAN			1299.9	1.6	1
KSREFNLM(+15.99)Y	19.54	1202.58	9	-0.2	602.295	37.44	17600000	16300000	O14896|IRF6_HUMAN	Oxidation (M)	M8:Oxidation (M):1000.00	137.6	0.4	1
KSRELNTRF	19.08	1149.63	9	0.7	384.216	20.45	13400000	16600000	Q8IXQ4|GPAM1_HUMAN			34.6	0.1	1
KSRGVLHQF	29.3	1070.6	9	0	536.307	21.94	155000000	180000000	P27144|KAD4_HUMAN			12.8	0.025	1
KSRKLAVNF	37.34	1061.63	9	0.6	531.825	25.43	99300000	110000000	Q8IZH2|XRN1_HUMAN			140.5	0.4	1
KSRLSISGW	38.47	1032.57	9	0.4	517.293	39.49	2770000	26900000	Q8N543|OGFD1_HUMAN			9.5	0.015	1
KSRPELLEY	27.48	1133.61	9	0.2	567.811	36.02	25500000	30000000	Q14258|TRI25_HUMAN			70.2	0.2	1
KSRPEVITF	26.78	1075.6	9	-0.6	538.808	36.28	8150000	7130000	Q9UL36|ZN236_HUMAN			32.9	0.1	1
KSRPIIKRF	28.26	1143.72	9	0.3	382.249	19.33	68000000	76200000	Q9P2P5|HECW2_HUMAN:Q76N89|HECW1_HUMAN			9.4	0.015	1
KSRRLQDSF	11.4	1135.61	9	1.4	379.544	21.1	2300000	8690000	Q92621|NU205_HUMAN			39.1	0.125	1
KSRTIPANW	18.01	1071.58	9	0.1	536.799	29.58		955000	Q4LE39|ARI4B_HUMAN			8	0.01	1
KSRVTQSNF	39.35	1065.56	9	0.2	533.786	18.73	28900000	35500000	P21796|VDAC1_HUMAN			184.5	0.5	1
KSSAISLHY	26.01	1004.53	9	0.7	503.272	31.02		1670000	Q7Z2Z2|EFL1_HUMAN			68.3	0.2	1
KSSASLVLL	12.5	916.559	9	0.5	459.287	26.83	373000	598000	Q9NP58|ABCB6_HUMAN			175.5	0.4	1
KSSDIAKTF	54.03	995.529	9	1.1	498.772	25.72	448000000	512000000	P13797|PLST_HUMAN			71.9	0.25	1
KSSEILKSL	20.8	1003.59	9	-0.5	502.803	31.62	330000	327000	Q6UWE0|LRSM1_HUMAN			190.1	0.5	1
KSSEVFTTF	44.11	1044.51	9	-1.7	523.263	47.61	88100000	112000000	P40222|TXLNA_HUMAN			134	0.4	1
KSSGAPASW	29.95	889.429	9	0	445.722	26.72		16700000	Q8IX18|DHX40_HUMAN			7.6	0.01	1
KSSKIM(+15.99)ESF	43.24	1071.53	9	0.4	536.771	23.63	10900000	6340000	P05023|AT1A1_HUMAN:P13637|AT1A3_HUMAN:Q13733|AT1A4_HUMAN	Oxidation (M)	M6:Oxidation (M):1000.00	29.8	0.09	1
KSSKIMESF	27.58	1055.53	9	0.7	528.774	29.78	490000	280000	P05023|AT1A1_HUMAN:P13637|AT1A3_HUMAN:Q13733|AT1A4_HUMAN			14.9	0.03	1
KSSLTQHSW	35.44	1072.53	9	0.8	537.273	24.31		3200000	Q9NYB0|TE2IP_HUMAN			4.6	0.01	1
KSSNVVRSF	28.59	1022.55	9	0.5	512.283	23.15	1600000	1830000	Q86XI2|CNDG2_HUMAN			47.3	0.15	1
KSSQPKPVI	37.19	982.581	9	0.7	492.298	19.56	2230000	2470000	Q9NR82|KCNQ5_HUMAN			3089.3	3	0
KSSQVQRRF	24.74	1134.63	9	1.8	379.217	17.6	37100000	37200000	P13010|XRCC5_HUMAN			50.9	0.15	1
KSSRKTYTF	21.85	1116.59	9	1.8	559.305	18.47	1030000	2780000	P52732|KIF11_HUMAN			26.6	0.07	1
KSSSSYHTW	11.11	1081.48	9	1.4	541.75	21.08		174000	Q8TEQ6|GEMI5_HUMAN			11.2	0.02	1
KSSTVLHTF	43.93	1018.54	9	-1.8	510.279	28.73	11500000	11300000	Q9Y4C1|KDM3A_HUMAN			18.3	0.04	1
KSSVEVYAW	19.55	1067.53	9	-0.9	534.771	48.65	0	803000	O95819|M4K4_HUMAN:Q8N4C8|MINK1_HUMAN			7.8	0.01	1
KSTAISLFY	15.2	1028.55	9	0.1	515.284	57.31	1800000	9470000	P13639|EF2_HUMAN			142.3	0.4	1
KSTDVAKTF	55.6	995.529	9	0.2	498.772	23.24	746000000	780000000	P13796|PLSL_HUMAN			128.2	0.4	1
KSTVNGVSW	14.38	976.498	9	0.5	489.256	37.74		1840000	Q9Y6Q9|NCOA3_HUMAN			7.9	0.01	1
KSVEGRPM(+15.99)F	12.95	1065.53	9	0.9	533.772	23.38	1120000	1310000	Q15020|SART3_HUMAN	Oxidation (M)	M8:Oxidation (M):1000.00	85.4	0.25	1
KSVGVFEAF	15.17	982.512	9	-1.5	492.263	56.2	762000	2160000	O14972|DSCR3_HUMAN			538.1	0.9	1
KSVKRGFEF	21.15	1096.6	9	-0.7	549.308	24.86	909000	1290000	Q16181|SEPT7_HUMAN			109.8	0.3	1
KSVKVFAEY	33.97	1069.58	9	-1.6	535.797	32.35	4270000	5020000	Q9H583|HEAT1_HUMAN			256	0.6	1
KSVKVSENF	18.58	1036.56	9	0.4	519.285	25.13	320000	1010000	Q9HBG7|LY9_HUMAN			278.2	0.6	1
KSVKYTVNF	23.04	1084.59	9	0.9	543.304	34.46	3220000	4040000	Q86X55|CARM1_HUMAN			452.2	0.8	1
KSVLVKQTI	43.93	1014.64	9	0.7	508.329	26.81	8160000	10100000	Q9UHX1|PUF60_HUMAN			593.7	1	1
KSVTAFFKW	34	1112.6	9	1	557.309	56.58	2180000	12900000	Q04637|IF4G1_HUMAN			9.5	0.015	1
KSVTKIYNY	14.48	1114.6	9	-2	558.307	27.33	273000	2190000	P37837|TALDO_HUMAN			342.6	0.7	1
KSVTLGYLF	32.37	1026.58	9	-0.1	514.295	64.17	22400000	38700000	P55265|DSRAD_HUMAN			15.4	0.03	1
KSWVFGVHF	24.24	1105.57	9	-0.7	553.792	60.85	1190000	7160000	P32248|CCR7_HUMAN			20.2	0.05	1
KSYAGEKIL	36.25	1007.57	9	-1.3	504.789	28.88	5080000	6120000	Q9NTJ3|SMC4_HUMAN			158.6	0.4	1
KSYGNEKRF	38.77	1127.57	9	0	376.865	18.18	5520000	7640000	Q06330|SUH_HUMAN:Q9UBG7|RBPJL_HUMAN			24.4	0.07	1
KSYSPEALW	10.52	1079.53	9	-2.1	540.77	53.67		1320000	Q96JI7|SPTCS_HUMAN			4.7	0.01	1
KSYVQGVTW	37.48	1066.54	9	-1.2	534.279	48.04	4740000	59400000	Q13112|CAF1B_HUMAN			4.8	0.01	1
KTAEDM(+15.99)NLF	27.33	1083.49	9	1.1	542.753	38.67	12700000	15900000	O95864|FADS2_HUMAN	Oxidation (M)	M6:Oxidation (M):1000.00	118	0.3	1
KTAEELM(+15.99)NF	29.06	1097.51	9	-0.2	549.76	37.91	12800000	15500000	P50990|TCPQ_HUMAN	Oxidation (M)	M7:Oxidation (M):1000.00	429	0.8	1
KTAENFRQF	29.62	1139.57	9	1.4	570.794	28.36	8730000	13400000	O43447|PPIH_HUMAN			231.3	0.5	1
KTAERVIIW	16.3	1114.65	9	-1.6	558.331	41.27		545000	P50748|KNTC1_HUMAN			24.2	0.07	1
KTAGKRYVY	19.08	1084.6	9	0.2	543.309	17.96	2280000	1880000	P14921|ETS1_HUMAN			204	0.5	1
KTALRPDMW	26.06	1116.58	9	0.7	559.295	38.89		2260000	Q9Y4A5|TRRAP_HUMAN			31.1	0.09	1
KTAPFDSRF	39.65	1067.54	9	-0.7	534.777	33.23	82800000	95400000	P14854|CX6B1_HUMAN			37.8	0.125	1
KTATHAVVF	15.33	972.539	9	0.4	487.277	24.93	837000	635000	O15254|ACOX3_HUMAN			203.3	0.5	1
KTAVVVGTI	37.08	886.549	9	-1.2	444.281	36.46	14700000	18800000	Q07020|RL18_HUMAN			1571	1.8	1
KTFPYQHRY	42.15	1238.62	9	0.5	413.881	22.64	39000000	45200000	Q8NI27|THOC2_HUMAN			10	0.015	1
KTFQGKPIM(+15.99)	42.74	1064.57	9	-0.6	533.291	19.74	14400000	29900000	Q71RC2|LARP4_HUMAN	Oxidation (M)	M9:Oxidation (M):1000.00	313	0.6	1
KTFRIKRFL	22.55	1207.76	9	1.1	403.593	31.68	276000000	475000000	P62891|RL39_HUMAN			50.3	0.15	1
KTFRPKRKF	18.16	1206.73	9	0.1	403.252	17.32	2570000	1480000	Q86TA1|MOB3B_HUMAN:Q96BX8|MOB3A_HUMAN			16.6	0.04	1
KTFTGHREW	26.54	1160.57	9	-1.3	387.864	20.95		13900000	P43034|LIS1_HUMAN			8.7	0.01	1
KTFTIKRFL	33.26	1152.7	9	0.7	385.241	40.34	15600000	27100000	Q96EH5|RL39L_HUMAN			102.5	0.3	1
KTFTTQETI	46.51	1067.55	9	-0.7	534.782	33.7	45500000	39900000	P06744|G6PI_HUMAN			89.1	0.25	1
KTFVQKQTL	44.32	1091.63	9	1.1	546.825	24.2	2890000	3700000	Q8N1W2|ZN710_HUMAN			119.2	0.3	1
KTGEHTWSL	27.68	1057.52	9	0.6	529.767	31.23		8170000	P58004|SESN2_HUMAN			918.2	1.3	1
KTGEKLVKF	15.54	1048.63	9	-0.7	525.321	18.96		1220000	Q7Z5P9|MUC19_HUMAN			587.8	1	1
KTGLVSSTW	19.77	977.518	9	0.7	489.767	41.37		2200000	Q9UKG1|DP13A_HUMAN			10.6	0.02	1
KTGNVVKRF	19.19	1047.62	9	-1	350.213	18	633000	374000	Q8NA23|WDR31_HUMAN			91.8	0.3	1
KTHAVLVAL	19.24	950.591	9	-0.2	476.303	34.69	828000	419000	P25786|PSA1_HUMAN			824.9	1.2	1
KTHPLWRLW	15.61	1235.69	9	-1.2	412.904	51		6190000	Q9HBE5|IL21R_HUMAN			4.8	0.01	1
KTIDAM(+15.99)DTW	30.18	1095.49	9	-1.6	548.752	37.87		7770000	Q9H6S0|YTDC2_HUMAN	Oxidation (M)	M6:Oxidation (M):1000.00	14.5	0.03	1
KTIDAMDTW	13.39	1079.5	9	-0.6	540.755	49.66		501000	Q9H6S0|YTDC2_HUMAN			12.6	0.025	1
KTIDNQRVY	24.34	1135.6	9	-0.7	568.806	23.32	2650000	3210000	Q9H9Y2|RPF1_HUMAN			306.8	0.6	1
KTIEDVREF	17.47	1135.59	9	-0.7	568.801	36.54	674000	556000	Q96NW4|ANR27_HUMAN			171.5	0.4	1
KTIGLREVW	15.82	1100.63	9	2.9	551.326	43.65		8480000	P26038|MOES_HUMAN:P15311|EZRI_HUMAN			9.6	0.015	1
KTIIKKLFF	17.02	1136.73	9	0.7	379.918	41.94	3280000	14300000	Q969X0|RIPL2_HUMAN			306.4	0.6	1
KTIKLWKSD	14.64	1117.65	9	-0.6	373.557	36.53	1800000	2560000	P61964|WDR5_HUMAN			1051.7	1.4	1
KTIKLWNTL	34.06	1115.67	9	0	558.842	47.73		11900000	P63244|RACK1_HUMAN			166.3	0.4	1
KTITDVINI	13.94	1015.59	9	-0.9	508.803	37.15	14800000	1610000	P06744|G6PI_HUMAN			5182.1	4.5	0
KTITQIEEF	11.64	1107.58	9	-1.3	554.797	47.52		2210000	Q15022|SUZ12_HUMAN			203.9	0.5	1
KTIVM(+15.99)GASF	31.41	968.5	9	-2.2	485.256	37.53	7950000	8630000	P37837|TALDO_HUMAN	Oxidation (M)	M5:Oxidation (M):1000.00	218.5	0.5	1
KTIVMGASF	13.08	952.505	9	-1.2	477.259	47.37		829000	P37837|TALDO_HUMAN			45.7	0.15	1
KTKAAVVTL	23.51	929.591	9	-0.3	465.803	23.97	2470000	2040000	Q8IZT6|ASPM_HUMAN			400.7	0.8	1
KTKDGVVEI	32.97	987.56	9	-1.4	494.787	26	15500000	15400000	P04792|HSPB1_HUMAN			12210.7	11	0
KTKEAVLLL	27.84	1013.65	9	-0.4	507.831	38.61	85000000	91300000	P36578|RL4_HUMAN			747.7	1.1	1
KTKEIEQVY	46.07	1136.61	9	0.1	569.311	25.3	1170000000	1380000000	Q8NEY8|PPHLN_HUMAN			154.7	0.4	1
KTKETIQVL	14.6	1058.63	9	0.4	530.324	28.46	281000	1550000	Q02224|CENPE_HUMAN			1056	1.4	1
KTKETSVNW	40.75	1091.56	9	-0.2	546.788	23.17		36400000	P55265|DSRAD_HUMAN			26.1	0.07	1
KTKEVADC(+119.00)F	37.33	1158.5	9	-0.2	580.26	22.77	9870000	14100000	P49792|RBP2_HUMAN	Cysteinylation	C8:Cysteinylation:1000.00	113.2	0.3	1
KTKEVIQEW	39.37	1159.62	9	-0.1	580.819	31.97	641000	71200000	Q9Y490|TLN1_HUMAN			10.1	0.015	1
KTKEVLQEW	39.37	1159.62	9	-0.1	580.819	31.97	641000	71200000	Q9Y4G6|TLN2_HUMAN			10.9	0.02	1
KTKFEQHTI	18.41	1130.61	9	-0.7	377.877	20.53	8720000	9460000	Q8IWA4|MFN1_HUMAN			709.6	1.1	1
KTKFPAEQY	53.74	1110.57	9	0.1	556.293	27.97	62800000	74400000	Q15631|TSN_HUMAN			729.9	1.1	1
KTKGFEVYL	13.09	1083.6	9	0.8	542.806	44.04	3180000	4030000	P49750|YLPM1_HUMAN			284.1	0.6	1
KTKGFHTTI	45.7	1031.58	9	0.3	516.796	18.81	57200000	40700000	Q15417|CNN3_HUMAN			592.5	1	1
KTKIEVIRM(+15.99)	23.5	1132.66	9	-0.3	378.562	21.55	12900000	3920000	Q16513|PKN2_HUMAN	Oxidation (M)	M9:Oxidation (M):1000.00	1969.6	2.5	0
KTKKIKEKY	44.16	1164.72	9	0.2	389.248	13.93	2260000	4020000	P08238|HS90B_HUMAN:Q58FF6|H90B4_HUMAN:Q58FF8|H90B2_HUMAN			248.5	0.6	1
KTKKPLLIY	18.07	1102.71	9	0.3	552.363	28.42	5900000	4420000	Q9BSR8|YIPF4_HUMAN			295.3	0.6	1
KTKKSLESI	45.75	1032.62	9	-1.1	517.316	18.35	234000000	289000000	P62888|RL30_HUMAN			1845.9	2	1
KTKLNPFKF	18.18	1121.66	9	-2.4	374.893	36.33		533000	O95149|SPN1_HUMAN			118.3	0.3	1
KTKNAVEKF	41.62	1063.6	9	1	532.809	16.65	10500000	8950000	Q7Z7A1|CNTRL_HUMAN			204.6	0.5	1
KTKPIHTII	13.91	1049.66	9	1.7	350.894	21.53	9840000	9140000	Q8IWI9|MGAP_HUMAN			267.8	0.6	1
KTKPSPSQF	17.76	1018.54	9	-0.5	510.279	19.06	340000	325000	Q8TCS8|PNPT1_HUMAN			117.6	0.3	1
KTKQTISLF	14.38	1064.62	9	-1.4	533.318	38.05	1890000	502000	P22681|CBL_HUMAN			133.2	0.4	1
KTKSVVLQL	13.59	1014.64	9	-1.2	508.329	34.82	4430000	6760000	O95163|ELP1_HUMAN			621	1	1
KTKVEPYSL	31.07	1063.59	9	0.3	532.803	28.67	5090000	7270000	Q96T88|UHRF1_HUMAN			288.9	0.6	1
KTKVIELLY	14.94	1105.67	9	0.6	553.845	45.86	5100000	4270000	Q9NZ52|GGA3_HUMAN			56.3	0.175	1
KTKVNKHAF	27.66	1071.62	9	-0.7	358.213	14.8		639000	P23381|SYWC_HUMAN			254.2	0.6	1
KTKVQEEKI	28.31	1101.64	9	-0.1	368.22	16.65	1880000	1620000	Q8TCG1|CIP2A_HUMAN			2316.4	2.5	0
KTLATQRRL	12.05	1085.67	9	-0.6	362.896	18.38		875000	Q9UIF9|BAZ2A_HUMAN			44.4	0.15	1
KTLDVDATY	22.39	1024.51	9	-0.3	513.261	37.81	3020000	3600000	P18858|DNLI1_HUMAN			92.5	0.3	1
KTLELPHVF	46.8	1082.61	9	0.2	542.314	53.97	26300000	43700000	O43913|ORC5_HUMAN			18.2	0.04	1
KTLERSYLL	23	1121.64	9	0.4	561.83	37.03	23200000	31500000	P23921|RIR1_HUMAN			83.8	0.25	1
KTLETHIKI	13.24	1081.65	9	-0.7	361.557	26.88		1490000	Q9H2P0|ADNP_HUMAN			423.8	0.8	1
KTLHETVNF	20.29	1087.57	9	0.3	544.79	30.81	6810000	3860000	Q9UBW7|ZMYM2_HUMAN			199.2	0.5	1
KTLNAHEHF	15.36	1095.55	9	0.6	366.19	20.04	262000	680000	P43034|LIS1_HUMAN			51.4	0.15	1
KTLPAKAKI	31.8	968.638	9	-1.1	323.886	19.03	568000	1090000	Q5T4S7|UBR4_HUMAN			76.8	0.25	1
KTLPDILTF	23.84	1046.6	9	-0.5	524.308	68.51	11300000	18900000	Q13569|TDG_HUMAN			13.7	0.03	1
KTLPSKPSW	17.63	1042.58	9	1.4	522.298	30.42		663000	Q8WV28|BLNK_HUMAN			5.7	0.01	1
KTLPTEAM(+15.99)W	27.45	1091.53	9	-0.2	546.773	42.69		3020000	Q9NYH9|UTP6_HUMAN	Oxidation (M)	M8:Oxidation (M):1000.00	6.6	0.01	1
KTLRAM(+15.99)LVY	13.35	1109.63	9	1.6	555.822	34.52	2560000	3210000	Q13233|M3K1_HUMAN	Oxidation (M)	M6:Oxidation (M):1000.00	40.3	0.125	1
KTLSPRELW	10.24	1128.63	9	-2.3	565.321	42.69		322000	Q96CP6|ASTRA_HUMAN			7.4	0.01	1
KTM(+15.99)KQQLQF	29.69	1166.61	9	0.1	584.313	24.94	9020000	17600000	A4D1P6|WDR91_HUMAN	Oxidation (M)	M3:Oxidation (M):1000.00	67.8	0.2	1
KTM(+15.99)LLIAHY	34.87	1104.6	9	2.2	553.308	37.24	10600000	7760000	Q9UG01|IF172_HUMAN	Oxidation (M)	M3:Oxidation (M):1000.00	154.2	0.4	1
KTM(+15.99)TDTYLL	21.67	1100.54	9	1.1	551.279	42.9	20500000	25100000	P32248|CCR7_HUMAN	Oxidation (M)	M3:Oxidation (M):1000.00	182.2	0.5	1
KTMKQQLQF	16.2	1150.62	9	-1.4	576.315	32.21		725000	A4D1P6|WDR91_HUMAN			31.4	0.09	1
KTMTDTYLL	14.45	1084.55	9	-0.2	543.281	50.71		2490000	P32248|CCR7_HUMAN			56.3	0.175	1
KTNLRRTTY	12.4	1151.64	9	0	384.888	16.83	1240000	1730000	P17844|DDX5_HUMAN			929.2	1.3	1
KTNQLQRII	18.84	1112.67	9	-0.8	557.34	33	1370000	343000	Q86U44|MTA70_HUMAN			1407	1.7	1
KTNTVLKVL	23.89	1014.64	9	-1.3	508.329	33.59	5730000	2610000	Q92673|SORL_HUMAN			527.9	0.9	1
KTQDVEYIF	14.09	1141.57	9	-3.6	571.788	53.71	1740000	1990000	Q9UJ83|HACL1_HUMAN			110.6	0.3	1
KTQGPRALW	33.76	1055.59	9	-0.8	528.801	31.42		48300000	Q96AG3|S2546_HUMAN			10.4	0.015	1
KTRDYLIKI	17.74	1148.69	9	0.6	383.905	35.53	24200000	37600000	P49792|RBP2_HUMAN:O14715|RGPD8_HUMAN:Q99666|RGPD5_HUMAN:P0DJD0|RGPD1_HUMAN:P0DJD1|RGPD2_HUMAN			3119.3	3	0
KTREAVATL	12.19	987.571	9	-0.2	494.793	21.68	339000	980000	Q8WVM7|STAG1_HUMAN			283.7	0.6	1
KTREVQERL	27	1157.65	9	-0.6	386.891	18.96	4740000	5250000	Q02224|CENPE_HUMAN			244.1	0.6	1
KTRGDHFKL	14.51	1100.61	9	0.3	367.877	19.33		521000	O43257|ZNHI1_HUMAN			219.2	0.5	1
KTRIIDVVY	30.75	1105.65	9	2.3	553.833	41.18	3640000000	4800000000	P62241|RS8_HUMAN			124	0.4	1
KTRIPPRTY	34.76	1130.66	9	1	377.893	18.41	6400000	8360000	Q9BWU0|NADAP_HUMAN			125.8	0.4	1
KTRLVREGF	34.3	1104.64	9	0.1	369.221	22.52	20900000	24500000	Q9Y2P5|S27A5_HUMAN			198.1	0.5	1
KTRPLIPEM	23.94	1083.61	9	-1.4	542.812	37.9	2810000	5730000	O94953|KDM4B_HUMAN			164.7	0.4	1
KTRPLIPEM(+15.99)	33.82	1099.61	9	-1.6	550.809	27.43	47400000	49600000	O94953|KDM4B_HUMAN	Oxidation (M)	M9:Oxidation (M):1000.00	827.6	1.2	1
KTRQIISTI	30.01	1058.64	9	-1.1	530.329	30.35	88700000	107000000	P37268|FDFT_HUMAN			697.9	1.1	1
KTRQSAYAL	19.09	1036.57	9	-0.6	519.29	22.66	3730000	4930000	Q9BYX4|IFIH1_HUMAN			644.9	1	1
KTRRNSVFQ	11.24	1134.63	9	0.2	379.216	17.96		6270000	P05023|AT1A1_HUMAN:P13637|AT1A3_HUMAN:P50993|AT1A2_HUMAN			4025	4	0
KTRSEIAQL	13.13	1044.59	9	-1.3	523.303	25.16	504000	1370000	Q86SQ7|SDCG8_HUMAN			213.1	0.5	1
KTRTNVPTF	38.66	1062.58	9	1.1	532.299	28.44	579000000	648000000	Q96BU1|S1PBP_HUMAN			105.3	0.3	1
KTSDFLKVL	10.55	1049.61	9	-0.7	525.813	51.17		632000	O15144|ARPC2_HUMAN			705.4	1.1	1
KTSDPGRSW	31.12	1032.5	9	-1.1	345.173	20.03		1540000	Q96JI7|SPTCS_HUMAN			17.4	0.04	1
KTSGIINKF	46.52	1006.58	9	-1.3	504.297	30.57	30500000	37200000	O95243|MBD4_HUMAN			39.3	0.125	1
KTSNIRANF	25.16	1049.56	9	0.8	525.789	24.01	9760000	10200000	Q14247|SRC8_HUMAN			309	0.6	1
KTSQTVATF	20.96	981.513	9	0.3	491.764	29.95	378000	242000	P52888|THOP1_HUMAN			73.5	0.25	1
KTTKLYSRF	24.07	1142.64	9	-0.8	381.889	23.09	259000	140000	O60508|PRP17_HUMAN			272.4	0.6	1
KTTNVRQTY	38.76	1109.58	9	0.9	555.799	18.09	7770000	8640000	Q6PJT7|ZC3HE_HUMAN			208.1	0.5	1
KTVAIHTLW	43.51	1067.61	9	1.7	534.815	44.16	3330000	27900000	Q92835|SHIP1_HUMAN			3.8	0.01	1
KTVDKFNEW	35.03	1165.58	9	0.4	583.796	35.08		10500000	P0DI82|TPC2B_HUMAN:P0DI81|TPC2A_HUMAN			98.6	0.3	1
KTVEEIISF	14.51	1064.58	9	-3.3	355.865	20.53		7360000	Q6P9F7|LRC8B_HUMAN			100.9	0.3	1
KTVEPLEYY	35.53	1140.57	9	-0.1	571.292	47.19	39100000	57800000	Q96B26|EXOS8_HUMAN			172	0.4	1
KTVKKNTFF	21.08	1111.64	9	-0.4	556.827	22.57	1170000	4520000	P51114|FXR1_HUMAN			183.3	0.5	1
KTVPERSSF	17.43	1049.55	9	0.4	350.858	21.27	783000	797000	Q93075|TATD2_HUMAN			58.3	0.175	1
KTVVKELTW	37.65	1102.64	9	-0.1	552.327	39.27		8090000	Q8WXB1|MT21A_HUMAN			7.9	0.01	1
KTVVNKDVF	33.4	1048.59	9	0.7	525.303	28.23	2110000	2240000	P61353|RL27_HUMAN			420.7	0.8	1
KTYTDRVFF	10.6	1175.6	9	-7.4	588.802	45.77		740000	O15031|PLXB2_HUMAN			83.5	0.25	1
KVAEVTKKF	51.57	1048.63	9	0.6	350.55	19.28	25300000	29000000	P35914|HMGCL_HUMAN			857.9	1.2	1
KVASALEKW	38.57	1030.58	9	-1.1	516.297	32.96		7180000	Q9UIG0|BAZ1B_HUMAN			29.5	0.09	1
KVIEINPYL	33.04	1087.63	9	0.1	544.821	56.27	7660000	7340000	P28062|PSB8_HUMAN:P28074|PSB5_HUMAN			3811	3.5	0
KVINAAHSF	52.54	985.534	9	-1.4	493.774	25.32	1720000	2070000	P49915|GUAA_HUMAN			227.8	0.5	1
KVKEEVM(+15.99)DW	12.5	1178.56	9	-0.6	590.289	28.47		505000	Q9NWK9|BCD1_HUMAN	Oxidation (M)	M7:Oxidation (M):1000.00	87.4	0.25	1
KVKEQKDYW	35.28	1222.63	9	-0.7	612.324	20.95		26700000	Q13137|CACO2_HUMAN			266.8	0.6	1
KVKGPFVTW	25.59	1060.61	9	0	531.311	45.01		2310000	Q12789|TF3C1_HUMAN			172.6	0.4	1
KVKGYDNLF	36.03	1082.58	9	1.8	542.296	40.11	9070000	11100000	O43681|ASNA_HUMAN			2576.5	3	0
KVKHLTRDW	20.43	1181.67	9	-1.1	394.896	18.63		2550000	Q9BRS8|LARP6_HUMAN			88.5	0.25	1
KVKKFLQEF	11.4	1165.69	9	0	583.85	34.19		890000	P33993|MCM7_HUMAN			1502.5	1.7	1
KVKKPKPEF	29.87	1099.68	9	-0.3	367.566	17.04	2740000	1110000	Q96KC8|DNJC1_HUMAN			6560.5	5.5	0
KVKNSQSFF	26.34	1083.57	9	-1.9	542.792	28.53	10700000	14900000	P54920|SNAA_HUMAN			3684.8	3.5	0
KVKPNLQTF	46.82	1073.62	9	1	537.819	30.01	22600000	24400000	Q96EY7|PTCD3_HUMAN			594	1	1
KVLELQRKL	36.05	1125.72	9	0.7	376.249	27.64	27700000	31700000	Q15075|EEA1_HUMAN			1512.4	1.7	1
KVLIDIREY	31.89	1147.66	9	-0.4	383.56	48	29300000	38200000	P53999|TCP4_HUMAN			1621.1	1.8	1
KVLKQRPRF	10.44	1170.73	9	-0.9	293.691	19.23		249000	O14646|CHD1_HUMAN			1023.9	1.4	1
KVLPIIQRW	10.58	1151.72	9	1.1	576.867	50.55		1240000	Q9BYW2|SETD2_HUMAN			7.4	0.01	1
KVLPNDPVF	30.05	1027.57	9	0.2	514.793	50.29	817000	3240000	P51946|CCNH_HUMAN			496.3	0.9	1
KVM(+15.99)PQNHSF	35.96	1102.52	9	0.5	552.269	20.39	4850000	4050000	Q9H8K7|CJ088_HUMAN	Oxidation (M)	M3:Oxidation (M):1000.00	994.3	1.3	1
KVMPQNHSF	12.16	1086.53	9	2	544.272	22.56	344000	714000	Q9H8K7|CJ088_HUMAN			115.2	0.3	1
KVNAM(+15.99)TFTF	18.41	1073.52	9	0	537.768	50.02	1110000	827000	Q5JPE7|NOMO2_HUMAN:Q15155|NOMO1_HUMAN:P69849|NOMO3_HUMAN	Oxidation (M)	M5:Oxidation (M):1000.00	2265	2.5	0
KVNGKGSLW	31.05	987.55	9	-1.1	494.782	26.5		5770000	P32314|FOXN2_HUMAN			165.3	0.4	1
KVRAELERW	16.04	1185.66	9	0	396.228	28.4		1440000	Q14BN4|SLMAP_HUMAN			15.7	0.04	1
KVRDQQLVY	19.91	1147.63	9	-0.3	383.552	26.71	20100000	24200000	Q9UJX6|ANC2_HUMAN			5092.7	4.5	0
KVREEIAEY	19.23	1135.59	9	-0.5	568.801	28.11	203000	347000	P49454|CENPF_HUMAN			2981.4	3	0
KVREIIQKL	14.54	1125.72	9	0.2	376.248	29.27	3390000	6150000	P13797|PLST_HUMAN			3155.3	3	0
KVRELELVY	31.5	1147.66	9	0.2	574.837	44.12	373000000	502000000	Q14764|MVP_HUMAN			1609.5	1.8	1
KVRTEKETI	17.39	1102.63	9	0.5	552.325	17.38	10800000	4400000	P12270|TPR_HUMAN			9628	8.5	0
KVSIDKIRF	12.68	1104.67	9	-3.1	369.228	25.11		1110000	Q15413|RYR3_HUMAN			2588.7	3	0
KVSVYLQNW	11.12	1135.6	9	0.5	568.809	56.27		1420000	Q13098|CSN1_HUMAN			113.1	0.3	1
KVTELLRTF	25.34	1105.65	9	0.9	553.832	46.37		15500000	Q15833|STXB2_HUMAN			1108.8	1.4	1
KVTTVKKFF	59.05	1096.66	9	-0.5	549.339	29.51	21700000	25300000	Q9UJ41|RABX5_HUMAN			1417.6	1.7	1
KVVDVVRNL	28.88	1040.63	9	0.2	521.324	38.71	9720000	12300000	P20591|MX1_HUMAN			16094.7	16	0
KVWKAPSSW	42.36	1087.58	9	0	544.798	38.04		13000000	Q99728|BARD1_HUMAN			11.6	0.02	1
LAAIRHARW	13.87	1092.63	9	-1.8	365.217	24.89		90500000	Q12905|ILF2_HUMAN			19.1	0.05	1
LAALKLDEW	14.14	1057.58	9	-0.1	529.798	64.05		1680000	Q9H6S0|YTDC2_HUMAN			214	0.5	1
LAALRHAKW	14.84	1064.62	9	-1.2	355.882	26.63		3680000	Q96KR1|ZFR_HUMAN			22.2	0.06	1
LAALRHARW	13.87	1092.63	9	-1.8	365.217	24.89		90500000	Q9UPR6|ZFR2_HUMAN			21.7	0.05	1
LAAVRGEQW	33.6	1028.54	9	0	515.277	38.92	1120000	43300000	P13498|CY24A_HUMAN			25.3	0.07	1
LAKGWAPTF	21.16	989.533	9	-0.3	495.774	54.25		5740000	Q00325|MPCP_HUMAN			555.3	0.9	1
LAKRGGYVW	17.9	1048.58	9	-0.1	525.298	31.46		5910000	Q16665|HIF1A_HUMAN			13.8	0.03	1
LAKTGVHHY	36.31	1024.55	9	0.6	513.28	17.11	5520000	5460000	P62888|RL30_HUMAN			3013.3	3	0
LAKVIHEKW	23.2	1122.65	9	0	375.226	27.15		3330000	Q86UW6|N4BP2_HUMAN			14.8	0.03	1
LANDVAEQW	27.11	1044.49	9	-1.3	523.25	54.73		5430000	P61088|UBE2N_HUMAN			45.5	0.15	1
LANKTPHTW	30.24	1066.56	9	1.3	534.286	23.59		6880000	Q9NVH2|INT7_HUMAN			11.7	0.02	1
LANPRKHSW	12	1107.59	9	-2	370.204	19.3		3010000	Q96PZ0|PUS7_HUMAN			14	0.03	1
LAPTDVKEL	17.92	984.549	9	2.4	493.283	43.23		603000	Q8WWM7|ATX2L_HUMAN			17237.1	17	0
LARRTNSTF	27.08	1064.57	9	1.1	355.865	20.42	59200000	53200000	Q07020|RL18_HUMAN			193.8	0.5	1
LATKKLDLW	16.36	1086.64	9	2.9	544.331	45.76		2800000	Q8NFA0|UBP32_HUMAN:P51784|UBP11_HUMAN:P35125|UBP6_HUMAN			89	0.25	1
LATTILQHW	42.23	1081.59	9	1.2	541.804	59.82	4990000	42300000	P78527|PRKDC_HUMAN			21.2	0.05	1
LAWQNPPGW	10.24	1067.52	9	0.4	534.767	72.51		1200000	Q9Y5V3|MAGD1_HUMAN			22.3	0.06	1
LAWQNPSGW	17.77	1057.5	9	-0.5	529.756	70.18		1310000	Q9Y5V3|MAGD1_HUMAN			21.7	0.05	1
LGRPDAEYW	24.1	1105.52	9	-0.4	553.767	49	2210000	31000000	P13760|2B14_HUMAN:Q30167|2B1A_HUMAN:P13762|DRB4_HUMAN:Q30154|DRB5_HUMAN:P01911|2B1F_HUMAN:Q5Y7A7|2B1D_HUMAN:P01912|2B13_HUMAN:Q29974|2B1G_HUMAN:P04229|2B11_HUMAN			51.5	0.15	1
LLKTGEHTW	25.91	1083.57	9	-0.2	542.793	29.82		3870000	P58004|SESN2_HUMAN			647.3	1	1
LSAKKLPNW	31.99	1055.61	9	-0.9	528.813	36.8		7120000	Q13118|KLF10_HUMAN			111.8	0.3	1
LSAKVRKQL	23.13	1041.67	9	0.2	348.229	19.8	2320000	1130000	Q8N884|CGAS_HUMAN			592.5	1	1
LSAPNLNSW	11.33	1000.5	9	1.1	501.257	65.56		778000	Q9H3S1|SEM4A_HUMAN			8.1	0.01	1
LSARASNAW	12.42	974.493	9	1.2	488.255	32.22		397000	Q9Y575|ASB3_HUMAN			14.9	0.03	1
LSFTHPISF	13.91	1047.54	9	-0.1	524.777	63.47		408000	Q9NTI5|PDS5B_HUMAN			146.7	0.4	1
LSGPFVQKW	41.04	1060.57	9	-0.5	531.292	55.7	3130000	42900000	P22102|PUR2_HUMAN			11.4	0.02	1
LSIHLQHKF	25.11	1121.63	9	-1	374.885	35.79	12700000	16000000	Q86XI2|CNDG2_HUMAN			39.2	0.125	1
LSIKVKLLR	14.8	1068.74	9	0.7	357.254	40.54	2040000	806000	Q9Y3D0|CIA2B_HUMAN			9553.3	8	0
LSKKLVVRW	23.77	1127.72	9	0.4	376.913	33.61	3280000	16500000	Q96H35|RBM18_HUMAN			13.7	0.03	1
LSKNVHSFF	40.67	1077.56	9	1.4	539.788	38.67	2720000	3230000	Q9Y2D8|ADIP_HUMAN			566	0.9	1
LSKPNPPSL	44.12	951.539	9	-2.4	476.776	37.59	8620000	10700000	Q9UKK3|PARP4_HUMAN			2730.3	3	0
LSKRNPRQI	27.21	1110.66	9	-0.4	371.228	17.38	12100000	16200000	P83731|RL24_HUMAN			2031.1	2.5	0
LSKRVLIM(+15.99)Y	16.36	1137.66	9	-1.1	569.836	36.43	5250000	10600000	Q9BTX1|NDC1_HUMAN	Oxidation (M)	M8:Oxidation (M):1000.00	667.4	1	1
LSKSDHSFF	41.46	1066.51	9	-1.3	534.261	36.46	7200000	10100000	P01909|DQA1_HUMAN:P01906|DQA2_HUMAN			1136.6	1.5	1
LSKSSATLW	21	991.534	9	1.3	496.775	42.62		13700000	Q3KQU3|MA7D1_HUMAN			11.7	0.02	1
LSLGVVKEF	25.32	990.575	9	0.2	496.295	60.16	6280000	9710000	Q9H7X0|NAA60_HUMAN			72.4	0.25	1
LSLKVLRKL	20.26	1068.74	9	-0.6	357.253	39.82	1610000	1770000	Q9UI26|IPO11_HUMAN			178.5	0.5	1
LSNTVM(+15.99)PRF	37.38	1079.54	9	1.3	540.78	39.56	15300000	17600000	P35221|CTNA1_HUMAN	Oxidation (M)	M6:Oxidation (M):1000.00	426.8	0.8	1
LSNTVMPRF	30.15	1063.55	9	1.9	532.783	50.3	5800000	12700000	P35221|CTNA1_HUMAN			132	0.4	1
LSQEQLRQW	37.29	1186.61	9	-0.8	594.312	45.8		5440000	P32248|CCR7_HUMAN			26.3	0.07	1
LSQPKIVKW	31.87	1097.66	9	0.6	549.837	40.17		53700000	P61769|B2MG_HUMAN			18.9	0.05	1
LSRELFESW	17.02	1165.58	9	-0.2	583.795	63.85		2210000	Q9UKF6|CPSF3_HUMAN			18.3	0.04	1
LSSPVTKSF	39.62	964.523	9	0.9	483.269	39.01	111000000	129000000	P0DOX7|IGK_HUMAN:P01834|IGKC_HUMAN			37.7	0.125	1
LSSSVIREL	25.8	1002.57	9	1.6	502.293	48.15	6300000	6730000	Q8NEJ9|NGDN_HUMAN			1468.9	1.7	1
LSSTEILKW	12.32	1075.59	9	0.3	538.803	61		1280000	P21359|NF1_HUMAN			14.4	0.03	1
LSTLAR(+.98)LLF	14.49	1033.62	9	1.2	517.817	41.04	1990000	2680000	Q02880|TOP2B_HUMAN	Citrullination	R6:Citrullination:1000.00	575.6	0.9	1
LSTLVRPVF	21.98	1030.62	9	0.3	516.316	57.54	2310000	2970000	O00506|STK25_HUMAN			1110	1.4	1
LTAVVQKRF	27.7	1060.64	9	0.3	354.554	29.93	6350000	6900000	P23396|RS3_HUMAN			53.7	0.175	1
LTDPNRPRF	19.31	1114.59	9	-1.4	372.536	29.78	27500000	6480000	Q969X0|RIPL2_HUMAN			3094	3	0
LTHKGVKEF	30.05	1057.59	9	1	529.804	18.75	1380000	1170000	Q8N1W2|ZN710_HUMAN			1159.3	1.5	1
LTKKSEEVF	11	1079.59	9	0.7	540.801	24.19		716000	Q14789|GOGB1_HUMAN			600.7	1	1
LTKKSSETL	19.1	1005.57	9	0.8	503.793	18.06	942000	1210000	P09543|CN37_HUMAN			4576.4	4	0
LTKNNRWTW	11.03	1217.63	9	-3.2	609.821	37.27		1060000	P35869|AHR_HUMAN			8.4	0.01	1
LTLPVNHIF	11.67	1052.6	9	-2.2	527.307	66.02		831000	Q5UIP0|RIF1_HUMAN			17.2	0.04	1
LTLQQTQRW	17.06	1172.63	9	0	587.322	45.93		1280000	Q9HA82|CERS4_HUMAN			14.9	0.03	1
LTM(+15.99)TRNAVW	29.4	1106.55	9	-0.1	554.284	37.26		14000000	O60684|IMA7_HUMAN:P52294|IMA5_HUMAN	Oxidation (M)	M3:Oxidation (M):1000.00	11.9	0.02	1
LTQLTTLNL	19.88	1015.59	9	-0.9	508.803	38.55		13700000	Q6ZNQ3|LRC69_HUMAN			13493.9	12	0
LTRPGSSYF	37.56	1026.51	9	0.9	514.264	42.06	69500000	89700000	O75937|DNJC8_HUMAN			251.1	0.6	1
LTRPNIYLI	12.83	1101.65	9	1.6	551.835	60.36		1720000	Q92922|SMRC1_HUMAN			116.7	0.3	1
LTRTELETL	16.63	1074.59	9	1.5	538.304	45.11	1700000	2870000	Q96KC8|DNJC1_HUMAN			1570.8	1.8	1
LTRVEVTEF	37.55	1092.58	9	0.8	547.298	48.31	158000000	185000000	Q01105|SET_HUMAN			293.4	0.6	1
LTVQVARVY	38.2	1047.61	9	1	524.812	46.81	10800000	15500000	P57076|CF298_HUMAN			347.2	0.7	1
LTVRNLPQY	44.84	1102.61	9	1.9	552.315	46.64	114000000	151000000	Q15233|NONO_HUMAN			230.7	0.5	1
LTYENVERW	33.85	1208.58	9	-0.5	605.298	52.98	9620000	81200000	P62491|RB11A_HUMAN:Q15907|RB11B_HUMAN			12.3	0.025	1
LVHAVQALW	27.34	1035.59	9	-1	518.8	57	5500000	56000000	P24001|IL32_HUMAN			13.1	0.025	1
LVKREDYLY	36.86	1197.64	9	0.6	599.827	33.9	32200000	39200000	O95298|NDUC2_HUMAN:E9PQ53|NDUCR_HUMAN			1747.3	1.9	1
LVRNSHHTW	12.38	1148.58	9	-0.9	383.868	18.04		2610000	Q9NXG6|P4HTM_HUMAN			23.8	0.06	1
LVRTEIVRW	22.24	1170.69	9	-0.1	391.236	44.77		1880000	Q9Y6X8|ZHX2_HUMAN			45.6	0.15	1
LVWKAQNTW	25.09	1144.6	9	-0.3	573.308	53.36		3500000	P02545|LMNA_HUMAN			12.3	0.025	1
M(+15.99)ALGIQKRF	19.77	1078.6	9	0.4	360.539	32.79	2110000	782000	O95070|YIF1A_HUMAN	Oxidation (M)	M1:Oxidation (M):1000.00	226.5	0.5	1
M(+15.99)LSLQLILL	13.07	1058.64	9	1.4	353.888	30.07		9230000	Q6UY13|YB003_HUMAN	Oxidation (M)	M1:Oxidation (M):1000.00	11043.9	9.5	0
M(+15.99)SLPIAKKY	26.34	1065.59	9	0.3	356.204	30.16	5870000	16000000	Q6UWU4|CF089_HUMAN	Oxidation (M)	M1:Oxidation (M):1000.00	136.8	0.4	1
M(+15.99)SLRLNEQY	11	1168.55	9	-0.5	585.284	38.99		3000000	Q14444|CAPR1_HUMAN	Oxidation (M)	M1:Oxidation (M):1000.00	529.4	0.9	1
M(+15.99)SRGVNPSL	14.58	975.481	9	-1.5	488.747	27.93	1500000	1630000	P46379|BAG6_HUMAN	Oxidation (M)	M1:Oxidation (M):1000.00	5436.8	5	0
M(+15.99)THGVLEEW	15.19	1116.49	9	-1	559.252	48.88		3970000	Q8WV22|NSE1_HUMAN	Oxidation (M)	M1:Oxidation (M):1000.00	31	0.09	1
M(+15.99)THNLLLNY	14.05	1133.55	9	1.1	567.785	51.37	3560000	3250000	Q13547|HDAC1_HUMAN:Q92769|HDAC2_HUMAN	Oxidation (M)	M1:Oxidation (M):1000.00	4824.6	4.5	0
M(+15.99)TKRDVPGF	40.07	1065.53	9	-0.9	533.771	27.8	15500000	14500000	Q9BXR0|TGT_HUMAN	Oxidation (M)	M1:Oxidation (M):1000.00	2314.8	2.5	0
M(+15.99)TNPHNHLY	59.25	1141.5	9	-0.2	571.756	20.76	59200000	61800000	Q15006|EMC2_HUMAN	Oxidation (M)	M1:Oxidation (M):1000.00	1006.6	1.3	1
M(+15.99)TVKEQQEW	16.78	1193.54	9	-1.5	597.776	29.65		1060000	Q13573|SNW1_HUMAN	Oxidation (M)	M1:Oxidation (M):1000.00	29.2	0.09	1
MALGIQKRF	15.48	1062.6	9	1.1	355.208	39.25		598000	O95070|YIF1A_HUMAN			14.7	0.03	1
MTHGVLEEW	14.13	1100.5	9	1	551.256	52.74		1680000	Q8WV22|NSE1_HUMAN			7.5	0.01	1
MTIMSLLLW	19.85	1106.59	9	0.5	554.301	59.85	328000	2460000	Q9H015|S22A4_HUMAN			6.7	0.01	1
MTKRDVPGF	33.77	1049.53	9	-1.5	525.773	30.99	856000	9110000	Q9BXR0|TGT_HUMAN			308.2	0.6	1
MTNPHNHLY	41.21	1125.5	9	-0.3	563.758	24.03	12700000	24300000	Q15006|EMC2_HUMAN			60.3	0.175	1
MTVKEQQEW	16.54	1177.54	9	-1.8	589.778	37.19		846000	Q13573|SNW1_HUMAN			10.1	0.015	1
NKTLTR(+.98)AQL	15.51	1044.59	9	1	523.304	24.95	1190000	1670000	Q6P0N0|M18BP_HUMAN	Citrullination	R6:Citrullination:1000.00	1473.1	1.7	1
NSRKQEAEW	24.99	1146.54	9	-0.8	574.278	19.42		24600000	P09496|CLCA_HUMAN			54	0.175	1
NSRSEAPNW	14.15	1059.47	9	-0.6	530.744	29.18		4810000	P60228|EIF3E_HUMAN			324.5	0.7	1
NSRTGEILW	10.31	1074.55	9	1.3	538.281	49.02		8910000	Q8N766|EMC1_HUMAN			90.3	0.25	1
NTHRPREYW	12.27	1257.6	9	0.3	420.207	22.71		1050000	Q8NEV1|CSK23_HUMAN:P68400|CSK21_HUMAN			49	0.15	1
NTRPQENTF	28.26	1105.52	9	-1	553.764	25.13	741000	599000	P48436|SOX9_HUMAN			593.2	1	1
P(+42.01)TKGGWKVV	12.92	1012.57	9	-0.2	507.292	50.01		1770000	Q12789|TF3C1_HUMAN	Acetylation (N-term)	P1:Acetylation (N-term):1000.00	2718.2	3	0
PARLTLQIW	14.06	1096.64	9	0.6	549.327	63.2		4610000	Q9HC10|OTOF_HUMAN			179	0.5	1
QAAERPQEW	38.17	1113.52	9	0.1	557.768	29.95		31900000	P25963|IKBA_HUMAN			304.7	0.6	1
QAFPNTNRW	22.93	1132.54	9	0.3	567.278	43.56		17800000	P26641|EF1G_HUMAN			11.8	0.02	1
QAIETARAW	33.87	1044.54	9	0.1	523.275	38.95		5190000	P61088|UBE2N_HUMAN:Q5JXB2|UE2NL_HUMAN			111.3	0.3	1
QAKKVITM(+15.99)F	20.86	1080.6	9	-0.5	541.307	26.51	4600000	3650000	P13010|XRCC5_HUMAN	Oxidation (M)	M8:Oxidation (M):1000.00	549.1	0.9	1
QALQVARQF	27.88	1059.58	9	1.2	530.799	41.23	3600000	3990000	Q8IVH2|FOXP4_HUMAN			404.7	0.8	1
QARIEIESF	19.8	1091.56	9	1	546.788	50.38	10300000	17700000	P11021|BIP_HUMAN			2082.5	2.5	0
QARNVM(+15.99)QSW	27.4	1134.52	9	-0.7	568.269	27.89		10400000	Q96R06|SPAG5_HUMAN	Oxidation (M)	M6:Oxidation (M):1000.00	33.8	0.1	1
QARNVMQSW	21.85	1118.53	9	0.5	560.272	40.5		1000000	Q96R06|SPAG5_HUMAN			11.4	0.02	1
QARPTVFRW	12.44	1159.62	9	3.2	387.55	42.89		1430000	Q9Y478|AAKB1_HUMAN			12	0.025	1
QARRLAPNF	20.97	1071.59	9	-1	358.205	28.21	6970000	8810000	Q00994|BEX3_HUMAN			4116.8	4	0
QATKKLDLW	22.79	1101.62	9	-0.8	551.816	38.75		7910000	Q9Y4E8|UBP15_HUMAN			384.2	0.7	1
QIFTYERKW	12.1	1269.65	9	1.7	424.225	45.3		823000	Q86UK7|ZN598_HUMAN			152.5	0.4	1
QLQQLKKKL	14.51	1125.72	9	-0.6	376.248	30.02	4680000	5520000	Q8TBY8|PMFBP_HUMAN			25884.9	36	0
QSAKEQIKW	32.22	1116.59	9	-0.1	559.304	28.18		49700000	P61923|COPZ1_HUMAN:Q9P299|COPZ2_HUMAN			59.7	0.175	1
QSFTGSRTY	29.74	1045.48	9	1.7	523.75	28.57	3380000	3310000	Q9GZY6|NTAL_HUMAN			926.2	1.3	1
QSHLNKALW	20.51	1095.58	9	-1.1	548.798	32.73		4950000	O60566|BUB1B_HUMAN			34.7	0.1	1
QSKKDFSKF	31.66	1113.58	9	-0.9	372.201	19.53	3600000	3430000	Q9HC24|LFG4_HUMAN			5485.5	5	0
QSKSPGSSW	34.06	962.446	9	0.4	482.23	22.89		8760000	Q5JSZ5|PRC2B_HUMAN			106.9	0.3	1
QSKSREALW	16.93	1103.57	9	0.6	552.794	27.68		1940000	Q92753|RORB_HUMAN			50.5	0.15	1
QSKTIKVSY	34.87	1052.59	9	-0.7	527.3	25.19	3510000	4960000	Q15717|ELAV1_HUMAN			2645.6	3	0
QSLIVKKEF	28.89	1090.64	9	1.1	546.327	35.19	4540000	6560000	O75674|TM1L1_HUMAN			450.7	0.8	1
QSLQIFRKW	29.11	1204.67	9	0	603.343	51	4610000	30900000	Q5TA45|INT11_HUMAN			41.3	0.125	1
QSLRLVRKL	35.69	1111.72	9	1.7	371.581	27.57	11400000	15000000	P51451|BLK_HUMAN			792.2	1.1	1
QSQIKGYVW	33.8	1107.57	9	0.2	554.793	47.24		25400000	Q9NZ42|PEN2_HUMAN			69.7	0.2	1
QSSGLVRHW	33.35	1068.55	9	2	535.282	29.01		22200000	Q15776|ZKSC8_HUMAN			55.8	0.175	1
QSSHLNVHW	14.94	1106.53	9	-1.2	369.849	34.28		2210000	Q8TAW3|ZN671_HUMAN			47.6	0.15	1
QSVDYRHKF	20.47	1178.58	9	0.3	393.868	24.26		761000	P31785|IL2RG_HUMAN			1848.5	2	1
QSYVLVKKW	25.32	1149.65	9	0.1	384.226	40.86		4500000	Q9UHB9|SRP68_HUMAN			11.1	0.02	1
QTATIAKTF	33.89	979.534	9	-1.1	490.774	33.59	568000	433000	Q96BD5|PF21A_HUMAN			356.3	0.7	1
QTFRLYREY	42.99	1274.64	9	-1.3	425.887	41.82	10100000	12600000	Q12789|TF3C1_HUMAN			636.5	1	1
QTFSSKTEW	13.04	1112.51	9	-1.1	557.264	38.71		1320000	Q6P2Q9|PRP8_HUMAN			20	0.05	1
QTILSLPSW	10.94	1043.57	9	-1.1	522.789	59.06		10700000	Q96PN6|ADCYA_HUMAN			45.1	0.15	1
QTKKINAKL	11.87	1042.65	9	-0.3	348.557	17.51		619000	Q96MD7|CI085_HUMAN			5019	4.5	0
QTKYLGRQW	19.27	1178.62	9	-0.5	393.88	32.3		4030000	Q5VSL9|STRP1_HUMAN:Q9ULQ0|STRP2_HUMAN			46.5	0.15	1
QTLHLMRQL	14.76	1138.63	9	0.3	380.55	39.91		1490000	O14730|RIOK3_HUMAN			356.4	0.7	1
QTRSPGETF	31.38	1021.48	9	1.9	511.75	25.35	7580000	8490000	Q8WVR3|CG043_HUMAN			1585.8	1.8	1
QTSKTQRLL	33.21	1073.62	9	-0.7	358.88	20.28	9990000	12300000	Q96P48|ARAP1_HUMAN			1616	1.8	1
QTVHINENF	14.09	1100.53	9	0.6	551.27	40.2	2000000	2180000	Q13573|SNW1_HUMAN			4326.9	4	0
QTVSPAEKW	45.96	1044.52	9	-0.4	523.269	34.45	2190000	156000000	Q16658|FSCN1_HUMAN			56	0.175	1
QVKKLKERW	10.21	1213.73	9	-1.6	405.583	18.02		206000	P16615|AT2A2_HUMAN			573.2	0.9	1
QVSRVVKLW	23.63	1113.67	9	-0.8	372.229	42.82		53700000	P35606|COPB2_HUMAN			58.3	0.175	1
R(+42.01)(+.98)VYEFLSAW	10.51	1212.58	9	-1.3	607.297	49.6		2340000	P26951|IL3RA_HUMAN	Acetylation (N-term); Citrullination	R1:Acetylation (N-term):1000.00;R1:Citrullination:1000.00	1081.7	1.4	1
RAAEQAHLW	11.54	1080.55	9	0.5	541.281	30.02		2060000	Q00610|CLH1_HUMAN:P53675|CLH2_HUMAN			8.1	0.01	1
RAAPFSLEY	22.88	1052.53	9	-0.8	527.271	53.33	17000000	25300000	Q15181|IPYR_HUMAN			159.4	0.4	1
RAASIYSSW	24.29	1039.51	9	0.2	520.762	46.06		4540000	Q92538|GBF1_HUMAN			13.6	0.03	1
RADKRVNEW	19.39	1172.61	9	0.5	391.876	19.9		29100000	Q15393|SF3B3_HUMAN			171.7	0.4	1
RAFHPDLEF	16.55	1130.55	9	1.2	566.283	48.56	3020000	1600000	O95864|FADS2_HUMAN			87.8	0.25	1
RAGPKKESW	32.44	1057.57	9	-1	353.529	17.33		2330000	Q96GQ5|RUS1_HUMAN			23.3	0.06	1
RAHPAYHSF	44.23	1084.52	9	0.5	362.514	19.1	5250000	6520000	Q14746|COG2_HUMAN			39.3	0.125	1
RAHRGLRHF	18.9	1148.64	9	0.3	383.888	15.83	2650000	4270000	P62269|RS18_HUMAN			203.8	0.5	1
RAIQINPAF	16.97	1028.58	9	-0.9	515.295	47.94	944000	2050000	O15294|OGT1_HUMAN			515	0.9	1
RAKAIIVEF	18.29	1045.63	9	0.8	523.822	41.86	85500000	119000000	O60841|IF2P_HUMAN			107.8	0.3	1
RAKATRISI	20.82	1014.63	9	1.9	339.218	20.3	1650000	2070000	P33992|MCM5_HUMAN			2300.1	2.5	0
RAKDRKDVW	11.1	1172.64	9	-0.7	391.887	17.27		1690000	Q4LE39|ARI4B_HUMAN			278	0.6	1
RAKLIEC(+119.00)GW	15.4	1193.57	9	-0.4	398.863	34.84		3140000	Q9NPA8|ENY2_HUMAN	Cysteinylation	C7:Cysteinylation:1000.00	17.4	0.04	1
RAKNVRNDW	36.19	1157.61	9	0.3	386.876	17.37		8400000	Q6RFH5|WDR74_HUMAN			20.8	0.05	1
RAKPEYHKF	53.49	1174.62	9	0.7	392.549	17.93	47900000	62900000	Q00341|VIGLN_HUMAN			95.5	0.3	1
RAKTVVLHI	34.31	1035.66	9	-0.4	346.226	26.3	11700000	14200000	Q9NVT9|ARMC1_HUMAN			3094.7	3	0
RALDIERKL	30.25	1112.67	9	0.9	371.897	29.57	11300000	8370000	Q96EA4|SPDLY_HUMAN			437	0.8	1
RALDKRHLL	12.03	1120.68	9	1.7	374.569	21.07	585000	541000	Q92624|APBP2_HUMAN			875.9	1.2	1
RALKEIRKF	41.54	1159.72	9	-0.7	387.58	20.28	15400000	19700000	P62899|RL31_HUMAN			39.8	0.125	1
RALKEITTF	15.68	1077.62	9	0	539.816	36.23	3920000	5080000	Q9NW13|RBM28_HUMAN			24.2	0.07	1
RALRHLESW	20.99	1166.63	9	0.5	389.884	27.84		8250000	Q9Y6M9|NDUB9_HUMAN			6.9	0.01	1
RALRLVRRL	15.74	1151.77	9	0.5	288.951	23.51	20900000	25300000	Q8N8D1|PDCD7_HUMAN			95.8	0.3	1
RANVNARTF	41.78	1047.56	9	2.2	524.787	21.49	18700000	23600000	Q00653|NFKB2_HUMAN			182.8	0.5	1
RARDIITAW	11.95	1100.61	9	0.7	367.877	43.32		4900000	P51617|IRAK1_HUMAN			14.3	0.03	1
RARELLVSY	22.44	1105.62	9	-0.9	369.548	37.42	81100000	98300000	Q9Y4W2|LAS1L_HUMAN			138.6	0.4	1
RAREYNARL	37.5	1147.62	9	0.7	383.548	19.71	139000000	166000000	Q00653|NFKB2_HUMAN			1037.5	1.4	1
RARPATDSF	26.23	1019.51	9	-0.4	340.845	21.41	29500000	38800000	P23588|IF4B_HUMAN			144.1	0.4	1
RARPKELRF	34.12	1171.69	9	1.7	391.572	20.47	10600000	14600000	Q53GA4|PHLA2_HUMAN			62.5	0.2	1
RARTIYERF	38.56	1210.66	9	1.1	404.56	27.18	29700000	33000000	Q9BZJ0|CRNL1_HUMAN			166	0.4	1
RASGLTQKW	21.92	1045.57	9	-0.3	523.791	25.4		8760000	Q6ZNJ1|NBEL2_HUMAN			10.1	0.015	1
RASNAFKTW	14.1	1079.55	9	-0.1	540.783	28.8		1850000	Q15057|ACAP2_HUMAN:Q96P50|ACAP3_HUMAN:Q15027|ACAP1_HUMAN			13.8	0.03	1
RASQSINTW	21.82	1061.53	9	1.6	531.771	33.74		9540000	P0DOX7|IGK_HUMAN			12.1	0.025	1
RATPENYLF	12.8	1109.55	9	-0.6	555.782	52.66		1940000	P04440|DPB1_HUMAN			21.2	0.05	1
RAVELVKSW	12.43	1086.62	9	-0.1	544.317	38.98		1210000	Q6ZS86|GLPK5_HUMAN			7.7	0.01	1
RAVQLQELW	13.47	1141.62	9	0	571.819	60.42		884000	Q14997|PSME4_HUMAN			9.6	0.015	1
RAYAKDVKF	22.88	1096.6	9	-0.4	366.541	23.49	7930000	289000	P10809|CH60_HUMAN			82.9	0.25	1
RAYLAQRKF	45.07	1151.66	9	0.2	384.893	22.71	12500000	16100000	O14579|COPE_HUMAN			41.9	0.125	1
RGIPTHRSW	12.93	1108.59	9	-0.2	370.537	22.87		765000	Q9BZH6|WDR11_HUMAN			20.8	0.05	1
RIINERHLF	18	1196.68	9	-0.4	399.9	32.72	1590000	2150000	Q7Z3E1|PARPT_HUMAN			987.8	1.3	1
RIKAINTFF	21.67	1108.64	9	-0.7	555.327	48.63	7050000	21200000	Q71RC2|LARP4_HUMAN			2110.6	2.5	0
RIKKGSHRW	18.9	1166.68	9	0	389.9	15.08		528000	Q9UIF9|BAZ2A_HUMAN			133.1	0.4	1
RILQTQESW	26.88	1159.6	9	-0.8	580.806	43.29		1180000	O14896|IRF6_HUMAN			33.2	0.1	1
RILVDQQVW	25.71	1155.64	9	-0.7	578.827	55.06		1470000	Q9NYY8|FAKD2_HUMAN			29.4	0.09	1
RIREHELLY	12.56	1227.67	9	1.5	410.232	28.59	2140000	2990000	Q5TF21|SOGA3_HUMAN			4647.7	4.5	0
RLADLKQLW	11.77	1141.66	9	0.5	571.838	55.84		7350000	Q01082|SPTB2_HUMAN			368.3	0.7	1
RLKDIKAQW	20.82	1156.67	9	0.2	386.565	30.16		6800000	Q6ZMZ3|SYNE3_HUMAN			428.1	0.8	1
RLKM(+15.99)KEEEW	12.88	1263.63	9	-0.6	422.216	20.58		2440000	Q96ST3|SIN3A_HUMAN	Oxidation (M)	M4:Oxidation (M):1000.00	102.1	0.3	1
RM(+15.99)FAPTKTW	25.94	1152.58	9	0	385.199	32.38	5230000	107000000	P36578|RL4_HUMAN	Oxidation (M)	M2:Oxidation (M):1000.00	22.1	0.06	1
RMFAPTKTW	40.09	1136.58	9	-1.1	569.297	38.11		27000000	P36578|RL4_HUMAN			7.4	0.01	1
RQGLTVLTW	19.67	1072.6	9	0.4	537.309	53.48	2630000	10800000	Q96JB1|DYH8_HUMAN			1343.4	1.6	1
RQSTILKRW	30.77	1186.69	9	0	396.572	25.2		22800000	Q96CS7|PKHB2_HUMAN			116	0.3	1
RSAATVAAW	15.65	931.487	9	1	466.752	35.74		10000000	Q8TEL6|TP4AP_HUMAN			8	0.01	1
RSAAYAARW	26.3	1050.54	9	0.6	526.275	28.04		7620000	Q00266|METK1_HUMAN:P31153|METK2_HUMAN			5.9	0.01	1
RSAEKLALF	18.22	1033.59	9	1.3	517.804	40.91	1650000	2670000	Q9NUD5|ZCHC3_HUMAN			92.9	0.3	1
RSAPVYKRI	16	1088.65	9	-0.2	363.889	19.87	397000	290000	Q9Y2L1|RRP44_HUMAN			274.2	0.6	1
RSAQAIHKF	27.73	1056.58	9	-2.8	353.2	19.03	1140000	1500000	Q9Y4B6|DCAF1_HUMAN			34.4	0.1	1
RSARPPEKF	15.19	1086.59	9	0.7	363.205	18.26	1530000	2170000	Q96GN5|CDA7L_HUMAN			90.5	0.25	1
RSAVFSVTY	17.41	1028.53	9	-0.6	515.271	48.12	2180000	5150000	Q8NF50|DOCK8_HUMAN			67.9	0.2	1
RSDPGHYSF	44.35	1064.47	9	-0.7	533.241	29.22	81000000	98400000	P28062|PSB8_HUMAN			270	0.6	1
RSFDLGRQF	16.32	1124.57	9	-1.3	375.864	42.16		1290000	Q92685|ALG3_HUMAN			36.9	0.125	1
RSFFHQHYL	24.37	1233.6	9	-2.9	412.207	35.83	0	1010000	P46379|BAG6_HUMAN			59.5	0.175	1
RSFHEVREF	41.29	1205.59	9	0.1	402.872	26.58	11800000	10200000	Q92963|RIT1_HUMAN			33.6	0.1	1
RSFPGFQAF	16.22	1055.52	9	-0.8	528.766	61.37	3820000	2710000	Q01780|EXOSX_HUMAN			176.9	0.5	1
RSFRVAKVF	15.21	1108.65	9	-0.5	370.557	32.38	6100000	6280000	Q6UXN9|WDR82_HUMAN			7.5	0.01	1
RSFVEKHRW	12.84	1243.66	9	-1.1	311.921	21.17		639000	O94955|RHBT3_HUMAN			4.1	0.01	1
RSGPFGQIF	26.92	1007.52	9	1.3	504.767	59.28	25600000	46800000	P07437|TBB5_HUMAN:P04350|TBB4A_HUMAN:P68371|TBB4B_HUMAN:Q9BVA1|TBB2B_HUMAN:Q13885|TBB2A_HUMAN			68.1	0.2	1
RSGPFGQLF	26.92	1007.52	9	1.3	504.767	59.28	25600000	46800000	Q9BUF5|TBB6_HUMAN			37.2	0.125	1
RSHDTLVRW	38.35	1168.61	9	-0.7	390.544	28.57	476000	22400000	Q9NU22|MDN1_HUMAN			15	0.03	1
RSHGFAAEF	33.51	1020.48	9	-1	511.246	32.7	5510000	2460000	P55265|DSRAD_HUMAN			63.9	0.2	1
RSHPYKHSF	40.86	1157.57	9	0	386.865	17.05	16800000	16900000	P0DPB5|RPC22_HUMAN			24.8	0.07	1
RSIEKRDTL	32.11	1116.63	9	0	373.216	17.76	3950000	6340000	Q9H6F5|CCD86_HUMAN			3832.6	3.5	0
RSIYKKDGW	12.66	1151.61	9	-1.8	384.876	23.56		888000	Q99569|PKP4_HUMAN			77.5	0.25	1
RSKADVERY	38.53	1122.58	9	-0.7	375.2	17.04	1540000	2280000	P49792|RBP2_HUMAN:O14715|RGPD8_HUMAN:Q99666|RGPD5_HUMAN			249.3	0.6	1
RSKEDGRLY	49.93	1122.58	9	-0.1	375.2	17.74	16600000	18100000	Q99640|PMYT1_HUMAN			276.9	0.6	1
RSKEESAHW	34.14	1128.53	9	0.7	377.185	17.24		19800000	Q9BY42|RTF2_HUMAN			15	0.03	1
RSKESEVFY	20.82	1143.56	9	0.1	382.193	28.56	6910000	9200000	Q16665|HIF1A_HUMAN			560.8	0.9	1
RSKESLVSF	11.75	1051.57	9	2.7	351.53	34.44	1020000	6200000	Q8IXB1|DJC10_HUMAN			150.7	0.4	1
RSKESVPEF	28.23	1077.55	9	0.5	539.78	29.8	74600000	81500000	P16949|STMN1_HUMAN			889	1.2	1
RSKKLLPNF	18.73	1101.67	9	-0.2	368.229	30.42	3080000	1610000	Q01432|AMPD3_HUMAN			581.6	0.9	1
RSKKLSVLI	33.72	1042.69	9	-0.7	348.569	27.84	11400000	13200000	Q9NTJ3|SMC4_HUMAN			697	1.1	1
RSKLIEPFF	13.95	1135.64	9	3.3	568.829	54.71	4030000	3340000	O95453|PARN_HUMAN			199.8	0.5	1
RSKLNPQQF	25.54	1116.6	9	0.3	559.309	25.36	9690000	10600000	P46977|STT3A_HUMAN			240.6	0.6	1
RSKPLFHHF	46.81	1167.63	9	0.6	390.218	21.67	47000000	54200000	Q03113|GNA12_HUMAN			62.5	0.2	1
RSKPQLARY	36.67	1117.64	9	1.2	373.553	19.42	5530000	5990000	O95983|MBD3_HUMAN:Q9UBB5|MBD2_HUMAN			84.4	0.25	1
RSKQAEEEF	37.14	1122.53	9	0.7	562.273	19.07	7790000	10700000	P26639|SYTC_HUMAN			351.9	0.7	1
RSKQTKELW	11.05	1174.65	9	0.6	392.556	20.95		507000	A7E2V4|ZSWM8_HUMAN			15.2	0.03	1
RSKTVYEGF	33.12	1085.55	9	-0.9	543.782	30.76	65900000	77900000	Q9NW38|FANCL_HUMAN			517.1	0.9	1
RSLEISQSY	23.67	1081.54	9	-0.8	541.777	37.56	1870000	2690000	Q13315|ATM_HUMAN			41.3	0.125	1
RSLLLQKKL	13.78	1097.73	9	0.4	366.917	27.18	2920000	1350000	O15514|RPB4_HUMAN			72.2	0.25	1
RSLPEHPAF	15.24	1052.54	9	0.7	527.278	34.21	985000	281000	Q0IIM8|TBC8B_HUMAN:O95759|TBCD8_HUMAN:Q6ZT07|TBCD9_HUMAN			67.8	0.2	1
RSLPQRFKM	31.28	1161.64	9	-0.5	388.222	27.51		3610000	Q9Y3D0|CIA2B_HUMAN			39.4	0.125	1
RSLPQRFKM(+15.99)	45.48	1177.64	9	0	393.554	20.52	18300000	24000000	Q9Y3D0|CIA2B_HUMAN	Oxidation (M)	M9:Oxidation (M):1000.00	396.5	0.7	1
RSLPYHVHW	19.18	1193.61	9	-0.4	398.877	37.33		475000	Q9H799|CPLN1_HUMAN			6.1	0.01	1
RSLRLQKQF	29.49	1174.69	9	-1.1	392.571	25.75	154000000	172000000	Q12788|TBL3_HUMAN			9.7	0.015	1
RSLSTTNVF	45.07	1023.53	9	0.3	512.775	40.79	18400000	23700000	Q16531|DDB1_HUMAN			34.4	0.1	1
RSLYKKDGW	12.66	1151.61	9	-1.8	384.876	23.56		888000	Q9UQB3|CTND2_HUMAN			37.8	0.125	1
RSM(+15.99)GLPLQF	14.41	1063.55	9	-2.1	532.78	56.84	1600000	2660000	Q96RS0|TGS1_HUMAN	Oxidation (M)	M3:Oxidation (M):1000.00	56.3	0.175	1
RSM(+15.99)QSSPRF	12.26	1110.52	9	-0.9	371.182	19.51		119000	Q14207|NPAT_HUMAN	Oxidation (M)	M3:Oxidation (M):1000.00	61	0.175	1
RSNGLSHSW	13.42	1042.49	9	0.3	522.255	23.3		1290000	Q9P0K1|ADA22_HUMAN			5.9	0.01	1
RSNRVVRTL	17.1	1099.66	9	1	367.56	18.19	1180000	1360000	Q9Y5Y5|PEX16_HUMAN			260.6	0.6	1
RSRGFAFVY	12.04	1101.57	9	1.7	368.199	44.04		2830000	P62995|TRA2B_HUMAN			35.1	0.1	1
RSRKELLNF	12.04	1161.66	9	-2.1	388.227	31.7	48300000	62400000	Q9Y3A4|RRP7A_HUMAN			211.9	0.5	1
RSRPHTRLF	39.71	1168.66	9	-0.9	293.171	19.62	29700000	34900000	Q9UKK3|PARP4_HUMAN			35.6	0.1	1
RSRQEPSRF	33.94	1161.6	9	0.7	388.208	16.52	3520000	5360000	O14647|CHD2_HUMAN			196	0.5	1
RSRRDELHY	16.24	1230.62	9	-0.1	411.214	18.15	8210000	9400000	Q9Y5W7|SNX14_HUMAN			68.9	0.2	1
RSRSFDYNY	29.21	1206.54	9	0.9	403.188	30.9	28600000	32400000	O75494|SRS10_HUMAN			121.8	0.4	1
RSRTIVHTL	30.84	1081.64	9	0.4	361.553	20.11	116000000	168000000	Q9NWU5|RM22_HUMAN			74.7	0.25	1
RSSGLTAVW	18.22	975.514	9	0.7	488.764	47.5		10200000	P53621|COPA_HUMAN			8.1	0.01	1
RSSGVRRSF	18.53	1050.57	9	2.3	351.197	16.59	1260000	1480000	Q14667|K0100_HUMAN			64.2	0.2	1
RSSKFRHVF	26.76	1162.64	9	-0.5	388.552	20.42	5040000	5190000	P31146|COR1A_HUMAN:Q92828|COR2A_HUMAN			30.4	0.09	1
RSSNVSYKY	20.51	1102.54	9	0	552.278	20.82	472000	208000	P11717|MPRI_HUMAN			41.2	0.125	1
RSSSLIRHY	32.02	1117.6	9	0.6	373.541	20.13	1920000	1760000	O75123|ZN623_HUMAN			118.1	0.3	1
RSTLVEHVY	18.61	1102.58	9	0.3	552.296	30.07	2820000	4380000	Q96H86|ZN764_HUMAN			83.4	0.25	1
RSTVAEHLW	11.96	1097.56	9	1	549.789	35.47		3850000	Q9UGJ1|GCP4_HUMAN			5	0.01	1
RSVLHHFHF	43.1	1178.61	9	2.4	393.878	29.89	30400000	40500000	Q15269|PWP2_HUMAN			104.7	0.3	1
RSVQKYHVF	26.76	1162.62	9	0.9	388.549	24.7	482000	960000	Q8IY21|DDX60_HUMAN			280.4	0.6	1
RSVRLYHLL	15.58	1155.69	9	-0.4	386.236	37.02		3770000	Q14137|BOP1_HUMAN			95.2	0.3	1
RTAHVILRY	22.99	1127.66	9	-0.9	376.892	25.92	16200000	19000000	Q9UKV5|AMFR_HUMAN			83.7	0.25	1
RTALHGVKW	20.23	1066.6	9	-1.3	356.541	25.91		5060000	Q9UKV3|ACINU_HUMAN			11.4	0.02	1
RTAQEVETY	35.82	1095.52	9	0.3	548.767	26.67	50800000	59000000	P17844|DDX5_HUMAN			477.2	0.8	1
RTAQKTALL	26.42	1000.6	9	0.7	501.309	22.14	3090000	4130000	Q9BVM2|DPCD_HUMAN			1491.4	1.7	1
RTATFQQRF	39.13	1153.6	9	2	385.541	28.87	24300000	25700000	Q9BY77|PDIP3_HUMAN			38.2	0.125	1
RTDGKVFQF	25.37	1096.57	9	0.6	549.291	39.4	6690000	8830000	P83731|RL24_HUMAN			1250.6	1.5	1
RTEILNQEW	16.62	1187.59	9	0.1	594.804	51.48		3300000	Q15910|EZH2_HUMAN			40.3	0.125	1
RTFGHLLRY	33.32	1161.64	9	-0.8	388.221	34.69	9020000	17000000	Q13200|PSMD2_HUMAN			51.1	0.15	1
RTFKRLYQY	25.51	1273.69	9	0	425.572	28.03	12000000	16900000	Q12789|TF3C1_HUMAN			13.9	0.03	1
RTFPDPTSW	11.73	1105.52	9	-3.9	553.765	55.69		3430000	Q13535|ATR_HUMAN			3.9	0.01	1
RTGTYRQLF	12.48	1140.6	9	-0.9	381.208	34.21		396000	P68363|TBA1B_HUMAN:Q71U36|TBA1A_HUMAN:P0DPH8|TBA3D_HUMAN:P0DPH7|TBA3C_HUMAN:Q9BQE3|TBA1C_HUMAN:Q6PEY2|TBA3E_HUMAN			242.8	0.6	1
RTHKDSFTY	26.74	1153.55	9	-0.5	385.524	19.59	3810000	2980000	O75362|ZN217_HUMAN			86	0.25	1
RTHPVATSF	41.03	1014.52	9	-1.5	508.269	23.79	5520000	8130000	Q96B26|EXOS8_HUMAN			16.1	0.04	1
RTHPVEIFY	13.04	1160.6	9	0.4	581.306	39.63	566000	1020000	O43143|DHX15_HUMAN			94.8	0.3	1
RTHQIRVHL	36.84	1158.67	9	0.7	290.676	20.97	7300000	9210000	Q8IZ73|RUSD2_HUMAN			1213.8	1.5	1
RTHTGEKKF	19.53	1102.59	9	0.8	368.537	14.23		155000	Q13118|KLF10_HUMAN:P08047|SP1_HUMAN:Q9Y2Y9|KLF13_HUMAN:Q02447|SP3_HUMAN:O14901|KLF11_HUMAN			144.5	0.4	1
RTHTGERPF	23.73	1099.55	9	0	367.525	17.88	289000	184000	Q9Y2Y9|KLF13_HUMAN:Q6NX45|ZN774_HUMAN:Q9UJQ4|SALL4_HUMAN:Q9BXA9|SALL3_HUMAN:P17025|ZN182_HUMAN:P10074|TZAP_HUMAN:Q14872|MTF1_HUMAN:A6NFI3|ZN316_HUMAN:Q9NSC2|SALL1_HUMAN:P52747|ZN143_HUMAN:Q9BWM5|ZN416_HUMAN:P36508|ZNF76_HUMAN:Q9BXK1|KLF16_HUMAN:Q7L3S4|ZN771_HUMAN:Q8TD94|KLF14_HUMAN:Q6ZN11|ZN793_HUMAN:Q6ZNH5|ZN497_HUMAN:Q9BR84|ZN559_HUMAN:Q8TF50|ZN526_HUMAN:Q9ULD5|ZN777_HUMAN:Q6ZN55|ZN574_HUMAN			516	0.9	1
RTINVYPNF	25.54	1122.58	9	-0.5	562.298	51.83	59300000	81200000	O95168|NDUB4_HUMAN			767.9	1.1	1
RTIQAHEGF	40.14	1057.53	9	0.3	529.773	24.7	4190000	6190000	Q9NV06|DCA13_HUMAN			185.8	0.5	1
RTIVIRRDY	35.39	1190.69	9	-0.8	397.903	24.29	368000000	511000000	P62280|RS11_HUMAN			202	0.5	1
RTKASVHTL	51.97	1011.58	9	0	338.201	17.21	36600000	36600000	O43660|PLRG1_HUMAN			210.3	0.5	1
RTKDILIRF	27.77	1160.7	9	0.1	387.908	38.81	73500000	101000000	Q68CP4|HGNAT_HUMAN			334	0.7	1
RTKEEVNEW	16.48	1189.57	9	-0.1	595.794	24.56		7830000	Q9UKD2|MRT4_HUMAN			18.4	0.04	1
RTKGQLANF	15.13	1033.57	9	1.3	517.791	25.09	1670000	4610000	Q01433|AMPD2_HUMAN			905.2	1.2	1
RTKPFHRKF	23.37	1215.7	9	-0.7	406.24	16.81	376000	716000	Q9Y5S2|MRCKB_HUMAN			28	0.08	1
RTKQPIAYF	12.78	1122.62	9	-1.1	562.316	36.53	1180000	1390000	Q5K651|SAMD9_HUMAN			96.6	0.3	1
RTKRPVAVY	17.3	1088.65	9	0.6	363.889	18.16	5510000	6970000	A1A4S6|RHG10_HUMAN			151.5	0.4	1
RTKRSSVVF	17.1	1078.62	9	-0.2	360.549	20.14	65600000	77100000	Q92608|DOCK2_HUMAN			109	0.3	1
RTKTKPHLF	44.57	1126.66	9	-0.4	376.561	17.91	33300000	39500000	Q9H307|PININ_HUMAN			110.4	0.3	1
RTLDNQLFF	14.93	1152.59	9	0.1	577.304	61.53		2480000	P26010|ITB7_HUMAN			155.3	0.4	1
RTLGEIPTY	13.48	1048.56	9	-0.3	525.285	46.32	2910000	818000	O43290|SNUT1_HUMAN			74.9	0.25	1
RTLKEILRY	17	1190.71	9	1.1	397.912	38.3	1310000	1770000	Q9UH17|ABC3B_HUMAN			45.3	0.15	1
RTLPNNKHY	24.45	1141.6	9	-0.4	381.54	17.03	830000	538000	Q9UPU7|TBD2B_HUMAN			38.8	0.125	1
RTLPVLLLY	11.6	1086.68	9	-0.1	544.347	71.58	178000	790000	Q9NR09|BIRC6_HUMAN			14.2	0.03	1
RTLRKDHRW	32.11	1266.71	9	0.2	317.684	16.53		8350000	O14776|TCRG1_HUMAN			5.7	0.01	1
RTM(+15.99)PIYPTY	26.13	1156.56	9	0.8	579.287	39.84	38000000	43000000	Q9P2E3|ZNFX1_HUMAN	Oxidation (M)	M3:Oxidation (M):1000.00	130.9	0.4	1
RTM(+15.99)QEIERY	22.14	1240.59	9	0.7	414.537	22.46	2290000	929000	Q15047|SETB1_HUMAN	Oxidation (M)	M3:Oxidation (M):1000.00	152.8	0.4	1
RTNAIKQTF	17.41	1077.59	9	-0.1	539.804	23.4	4910000	5310000	Q676U5|A16L1_HUMAN			47.5	0.15	1
RTQIRHM(+15.99)KF	32.94	1231.66	9	1	411.561	17.57	71500000	86300000	O95503|CBX6_HUMAN	Oxidation (M)	M7:Oxidation (M):1000.00	145.3	0.4	1
RTQIRHMKF	38.34	1215.67	9	-0.9	406.229	19.4	17800000	36900000	O95503|CBX6_HUMAN			159.7	0.4	1
RTRHLPLQF	29.62	1166.67	9	1.8	389.897	34.06	43100000	56300000	P09884|DPOLA_HUMAN			42.2	0.125	1
RTRIAAQGF	15.48	1018.57	9	0.4	340.53	25.82	571000	1210000	Q9BW72|HIG2A_HUMAN			114.2	0.3	1
RTRKQKYFY	13.34	1288.7	9	0.2	430.575	19.41	856000	1090000	P49761|CLK3_HUMAN			92.1	0.3	1
RTSIVEKRF	44.46	1134.65	9	-0.8	379.224	23.04	12400000	28400000	Q9BXR0|TGT_HUMAN			28.4	0.08	1
RTTDLLTDW	22.21	1119.56	9	-0.5	560.785	63.04		1050000	Q14204|DYHC1_HUMAN			26.3	0.07	1
RTTNLIRHF	48.18	1156.65	9	0	386.556	26.43	97800000	112000000	Q14592|ZN460_HUMAN			107.3	0.3	1
RTTQIYTYF	18.56	1191.59	9	-0.6	596.803	53.99	437000	815000	Q9UGP8|SEC63_HUMAN			151.8	0.4	1
RTVEKPPKF	49.8	1100.63	9	1.7	367.886	22.04	153000000	183000000	Q01082|SPTB2_HUMAN:O15020|SPTN2_HUMAN:P11277|SPTB1_HUMAN			472.6	0.8	1
RTVEKTWKL	34.83	1159.67	9	0.8	387.565	25.74		13200000	Q13191|CBLB_HUMAN			272.8	0.6	1
RTVIIEQSW	39.5	1130.61	9	0.1	566.312	49.56	66700000	139000000	P10809|CH60_HUMAN			5.2	0.01	1
RTVNEPWTM(+15.99)	21.97	1148.53	9	0.1	575.271	37.74		3080000	Q8N1G2|CMTR1_HUMAN	Oxidation (M)	M9:Oxidation (M):1000.00	1554.8	1.8	1
RTVRIWRQY	26.72	1276.72	9	0.5	426.579	29.6	5850000	30500000	O76071|CIAO1_HUMAN			33.6	0.1	1
RTWAERRQF	28.63	1248.65	9	-0.1	417.223	24.45		2130000	Q8WYQ5|DGCR8_HUMAN			16.3	0.04	1
RTWLLKTHW	26.25	1239.69	9	-1.2	414.236	44.64		8130000	Q96AC1|FERM2_HUMAN			4.7	0.01	1
RTYEHEAM(+15.99)W	20.41	1237.52	9	-0.3	413.513	27.9		3880000	Q13315|ATM_HUMAN	Oxidation (M)	M8:Oxidation (M):1000.00	7.1	0.01	1
RTYPQDPAW	11.7	1132.53	9	-0.9	567.272	40.54		335000	Q6ZS81|WDFY4_HUMAN			10.4	0.015	1
RVAHFGYHW	35.42	1171.57	9	-0.3	391.53	34.01	650000	7240000	O15239|NDUA1_HUMAN			11.9	0.02	1
RVAQM(+15.99)KRTW	29.04	1190.63	9	-0.7	397.885	17.01	175000	15100000	Q8IY37|DHX37_HUMAN	Oxidation (M)	M5:Oxidation (M):1000.00	70.2	0.2	1
RVAQMKRTW	36.13	1174.64	9	-1.5	392.553	20.54		7700000	Q8IY37|DHX37_HUMAN			55	0.175	1
RVEPNIKWF	20.8	1187.65	9	0.2	594.83	52.24		5980000	Q13823|NOG2_HUMAN			2375.3	2.5	0
RVFPHEVNW	31.15	1182.59	9	-1.2	592.303	43.38		9030000	Q12789|TF3C1_HUMAN			19.9	0.05	1
RVFVHYTGW	17.25	1163.59	9	-1.8	582.8	45.16		111000	Q02790|FKBP4_HUMAN			28.7	0.08	1
RVHPETYEW	37.54	1215.57	9	0.2	608.791	35.04	302000	21500000	Q7KZ85|SPT6H_HUMAN			13.1	0.025	1
RVIDVGSEW	26.32	1059.53	9	0.6	530.775	50.71	1840000	20700000	Q00403|TF2B_HUMAN			148.6	0.4	1
RVISGHLGW	23.48	1023.56	9	0.7	512.788	38.54		10500000	O43660|PLRG1_HUMAN			112.9	0.3	1
RVKEIYNTY	16.14	1184.62	9	1.3	593.317	27.82	503000	2820000	Q99502|EYA1_HUMAN			4234.3	4	0
RVKKYPYLW	19.33	1251.71	9	-0.3	418.245	38.78		7320000	P08243|ASNS_HUMAN			16.7	0.04	1
RVKPNIFSY	25.24	1122.62	9	0.2	562.317	40.36	7210000	10200000	Q96PZ0|PUS7_HUMAN			724.7	1.1	1
RVKRLYSNW	15.25	1220.68	9	-0.3	407.9	26.85		6590000	Q9Y5B9|SP16H_HUMAN			268.1	0.6	1
RVKTHLPSW	23.51	1122.63	9	-0.3	375.217	29.65		59000000	P17026|ZNF22_HUMAN			111	0.3	1
RVKTVTFEY	22.05	1141.61	9	-0.9	571.813	36.85	7640000	11600000	O75891|AL1L1_HUMAN			3830.2	3.5	0
RVM(+15.99)M(+15.99)VAKKF	27.63	1140.61	9	-0.1	381.212	18.89	2890000	2750000	P30101|PDIA3_HUMAN	Oxidation (M)	M3:Oxidation (M):1000.00;M4:Oxidation (M):1000.00	6954.5	6	0
RVMM(+15.99)VAKKF	23.36	1124.62	9	-1.1	375.88	21.17	395000	362000	P30101|PDIA3_HUMAN	Oxidation (M)	M4:Oxidation (M):17.01	2019.1	2.5	0
RVNEYRFAW	11.59	1239.61	9	-0.5	414.212	48.48		464000	Q9UI12|VATH_HUMAN			277.6	0.6	1
RVRDINEAF	21.62	1118.58	9	2.3	373.869	32.09	53400000	64700000	Q99081|HTF4_HUMAN:P15923|TFE2_HUMAN:P15884|ITF2_HUMAN			6025.6	5.5	0
RVRDVVTKY	29.89	1134.65	9	1.5	379.225	22.28	35000000	40700000	Q12931|TRAP1_HUMAN			3209.7	3	0
RVTTIARNW	23.09	1115.62	9	-0.6	558.817	30.34		12200000	Q15437|SC23B_HUMAN:Q15436|SC23A_HUMAN			98	0.3	1
RVVDFDETW	13.18	1165.54	9	0.7	583.778	57.22		2970000	Q13617|CUL2_HUMAN			71.3	0.25	1
RVWDIVRHY	32.3	1242.66	9	0.4	415.228	41.31		4670000	Q12788|TBL3_HUMAN			1805.8	2	1
RVWQWDEKW	22.86	1331.64	9	1	666.828	56.74		3620000	Q7KZ85|SPT6H_HUMAN			15.2	0.03	1
RVYKSLKVW	38.31	1177.7	9	0.3	393.573	32.1		7200000	Q9HCS7|SYF1_HUMAN			14.8	0.03	1
S(+42.01)RGSLKISW	14.95	1074.58	9	-0.4	359.201	38.68		3540000	Q5FWE3|PRRT3_HUMAN	Acetylation (N-term)	S1:Acetylation (N-term):1000.00	496.1	0.9	1
S(+42.01)TPRLSPTF	10.33	1046.54	9	1.1	524.278	43.42		2070000	Q5U5Q3|MEX3C_HUMAN	Acetylation (N-term)	S1:Acetylation (N-term):1000.00	11603.2	10	0
S(+42.01)VRPPKKSW	10.3	1125.63	9	-1.4	563.821	40.41		1450000	Q9NTJ3|SMC4_HUMAN	Acetylation (N-term)	S1:Acetylation (N-term):1000.00	277.7	0.6	1
SAANIQPIF	18.83	959.508	9	0	480.761	61.97	1180000	1970000	P26010|ITB7_HUMAN			1409.8	1.7	1
SAAVKDTLW	16.78	989.518	9	0.2	495.766	46.13		475000	Q96RT1|ERBIN_HUMAN			42.8	0.125	1
SAAYLPRM(+15.99)W	25.36	1109.53	9	0.9	555.774	50.24	1700000	18100000	Q9UKK3|PARP4_HUMAN	Oxidation (M)	M8:Oxidation (M):1000.00	32.9	0.1	1
SAAYLPRMW	24.1	1093.54	9	0.8	547.777	61.7		2200000	Q9UKK3|PARP4_HUMAN			37.9	0.125	1
SADGTIKLW	25.63	989.518	9	2.4	495.767	55.84		3990000	Q12788|TBL3_HUMAN			138.3	0.4	1
SADGTLKLW	25.63	989.518	9	2.4	495.767	55.84		3990000	O14727|APAF_HUMAN			148.4	0.4	1
SADKTVKLW	45.18	1046.58	9	0.4	524.295	37.33		13300000	Q9Y263|PLAP_HUMAN			132.3	0.4	1
SADRTVKLW	15.44	1074.58	9	1.2	538.299	39.09		13200000	P57737|CORO7_HUMAN			72	0.25	1
SAHGIVVAW	29.53	938.497	9	0.7	470.256	52.04	298000	3200000	Q9Y4W2|LAS1L_HUMAN			135.5	0.4	1
SAIIIQRKW	26.43	1113.67	9	-1.6	557.839	40.26	609000	8130000	Q8IZT6|ASPM_HUMAN			14.8	0.03	1
SAIKENFQF	22.24	1082.54	9	0.1	542.277	50.97	843000	1080000	Q460N5|PAR14_HUMAN			305.7	0.6	1
SAIRYQEVW	14.02	1150.58	9	-2.5	576.294	50.84		3090000	Q9H792|PEAK1_HUMAN			26.1	0.07	1
SAKKASTLW	38.61	990.55	9	-0.3	496.282	24.77		11500000	Q9P275|UBP36_HUMAN			21.7	0.05	1
SAKRVAESW	32.38	1032.54	9	-0.7	517.274	22.96		16600000	Q9H7M6|ZSWM4_HUMAN			17.5	0.04	1
SAKVNVFRK	14.55	1047.62	9	-1.7	350.213	18.99		140000	Q99698|LYST_HUMAN			20898.3	24	0
SALIIQKHW	35.67	1094.62	9	0.6	548.319	41.6	2810000	15200000	Q15051|IQCB1_HUMAN			9.4	0.015	1
SALPTSPHW	18.56	994.487	9	3.5	498.253	47.47		441000	Q9P2H5|UBP35_HUMAN			15.7	0.04	1
SAPSRATAL	16.25	872.472	9	-0.8	437.243	23.75	7300000	8610000	Q6PI47|KCD18_HUMAN			20529.6	23	0
SAPYGRITL	14.93	976.534	9	-1.4	489.274	47.47	3180000	3100000	Q7L576|CYFP1_HUMAN:Q96F07|CYFP2_HUMAN			21731.7	26	0
SARAGIHLW	19.44	1009.55	9	0.9	337.523	40.67		22500000	Q9HAY2|MAGF1_HUMAN			11.3	0.02	1
SAREDVATW	22.03	1033.48	9	0.2	517.749	36.98	108000	21000000	P78316|NOP14_HUMAN			27.5	0.08	1
SARGSGATW	16.27	891.42	9	-0.2	446.717	22.18		6040000	P55809|SCOT1_HUMAN			20.8	0.05	1
SARQANVHW	38.19	1067.53	9	-0.1	356.849	23.7		32700000	Q9NWQ4|GPT2L_HUMAN			41.8	0.125	1
SARVGSLSW	13.93	961.498	9	1.3	481.757	46.6		1390000	Q12834|CDC20_HUMAN			43.6	0.15	1
SASEVLKEW	35.58	1047.52	9	-0.6	524.769	49.1		3560000	Q86XZ4|SPAS2_HUMAN			36.8	0.125	1
SASKPLASW	34.72	945.492	9	-0.2	473.753	38.31		2650000	O15254|ACOX3_HUMAN			30.8	0.09	1
SATRTLHEW	24.89	1099.54	9	0.2	550.778	26.81		11500000	P27708|PYR1_HUMAN			18.7	0.04	1
SAVNIIRTF	40.93	1019.58	9	-0.3	510.795	53.91	10500000	14000000	P29728|OAS2_HUMAN			396.1	0.7	1
SLALIIFDW	19.32	1076.59	9	-3	539.301	54.59		413000	Q8IZM9|S38A6_HUMAN			2685.9	3	0
SLIESVRTY	15.27	1066.57	9	0.3	534.29	33.01	1100000	908000	Q14204|DYHC1_HUMAN			15292.7	15	0
SSDGTIRLW	21.81	1033.52	9	1.7	517.768	56.34		944000	Q8TAF3|WDR48_HUMAN			132.1	0.4	1
SSDKSVKVW	41.81	1034.54	9	-0.3	518.277	26.61		22800000	Q9GZS3|WDR61_HUMAN			282.4	0.6	1
SSDSTVRVW	37.19	1035.5	9	-0.1	518.756	39.59		3490000	Q9UKB1|FBW1B_HUMAN:Q9Y297|FBW1A_HUMAN			336.1	0.7	1
SSDTTVKVW	43.62	1021.51	9	0.4	511.762	40.01		13100000	Q8TAF3|WDR48_HUMAN			230.2	0.5	1
SSEKHAYSW	15.04	1093.48	9	-0.8	547.748	24.44		538000	Q8WUM0|NU133_HUMAN			89.2	0.25	1
SSHPHNLLW	10.28	1089.54	9	1.2	364.186	38.45		2460000	Q8IX21|SLF2_HUMAN			20.3	0.05	1
SSHRLDEYW	10.8	1191.53	9	-1.6	398.184	40.8		501000	Q9NNW5|WDR6_HUMAN			15.9	0.04	1
SSIQKVNEW	31.72	1089.55	9	-0.1	545.78	36.83		2790000	P38398|BRCA1_HUMAN			137.4	0.4	1
SSKEDNPKW	25.72	1089.51	9	1.2	545.763	20.96		2170000	Q9P016|THYN1_HUMAN			99.9	0.3	1
SSKPDPSQW	42.11	1030.47	9	0.1	516.243	31.69		27300000	O75410|TACC1_HUMAN			36.5	0.125	1
SSKSTEIKW	15.52	1064.55	9	-0.4	355.857	28.03		5650000	Q01105|SET_HUMAN			50.8	0.15	1
SSKSVKEAW	24.2	1020.52	9	-0.5	511.269	21.6		503000	O00443|P3C2A_HUMAN			138.8	0.4	1
SSLKHLYKW	26.57	1160.63	9	-0.2	387.885	31.74		2730000	Q9HC21|TPC_HUMAN			9.3	0.015	1
SSLKKKQIW	32.39	1116.67	9	-0.5	373.229	20.54		19200000	Q16658|FSCN1_HUMAN			41.6	0.125	1
SSLKRLTRW	13.11	1145.67	9	0.2	382.896	28.28		3000000	Q9H4E7|DEFI6_HUMAN			16.5	0.04	1
SSLPDNRAY	23.51	1021.48	9	0.4	511.749	29.96	1570000	2620000	Q69YN4|VIR_HUMAN			750.3	1.1	1
SSLPTVEKW	28.21	1045.54	9	-0.1	523.779	49.41		2340000	Q96HU1|SGSM3_HUMAN			9.9	0.015	1
SSLQLYRQF	20.87	1140.59	9	0.4	571.304	53.24	8460000	12500000	Q76N32|CEP68_HUMAN			364.2	0.7	1
SSLRAHETW	12.87	1085.53	9	0.7	362.849	25.98		594000	Q9NU22|MDN1_HUMAN			8.5	0.01	1
SSLRVPSQW	39.08	1058.55	9	0.2	530.283	49.56	3530000	69600000	P25774|CATS_HUMAN			8.2	0.01	1
SSRKEQLVF	15.75	1092.59	9	-0.4	547.303	30.1	2740000	4600000	Q8N1B4|VPS52_HUMAN			368.3	0.7	1
SSRNYQQHW	19.57	1204.54	9	-2.1	402.519	23.29		2280000	Q8TEM1|PO210_HUMAN			33.6	0.1	1
SSRPTSTIW	20.46	1033.52	9	0	517.767	37.74		10900000	P30876|RPB2_HUMAN			10.7	0.02	1
SSRQIISHW	30.18	1112.57	9	-1.2	371.864	32.53	3240000	81100000	Q09472|EP300_HUMAN:Q92793|CBP_HUMAN			26.8	0.07	1
SSRRKQLTF	13.44	1121.63	9	0.5	374.884	20.29	34000000	25000000	Q8WTV1|THAP3_HUMAN			287.2	0.6	1
SSRTDRDAW	19.26	1092.49	9	-1.4	365.172	20.69		684000	Q9UPN3|MACF1_HUMAN			353.8	0.7	1
SSSKEHVKW	14.28	1086.55	9	-0.3	363.189	17.77		1780000	P46063|RECQ1_HUMAN			41.4	0.125	1
SSSPYTRNW	13.27	1096.49	9	-1.1	549.254	35.7		341000	Q9Y2Z0|SGT1_HUMAN			84.8	0.25	1
SSSSIEVHW	20.2	1030.47	9	0.4	516.244	47.85		1820000	Q9Y6N7|ROBO1_HUMAN			33.4	0.1	1
SSSSVRVEW	32.95	1035.5	9	0.3	518.757	40.68	1090000	8910000	Q9NZ45|CISD1_HUMAN			64.2	0.2	1
SSVRAVAVW	17.91	973.534	9	-0.4	487.774	44.88		2880000	Q9NNW5|WDR6_HUMAN			13.7	0.03	1
STAKC(+119.00)LNIW	24.19	1153.53	9	1.1	577.771	45.1		24700000	P13164|IFM1_HUMAN:Q01629|IFM2_HUMAN:Q01628|IFM3_HUMAN	Cysteinylation	C5:Cysteinylation:1000.00	64.8	0.2	1
STASWAERF	19.52	1053.49	9	1.8	527.752	34.4	7100000	5360000	P11277|SPTB1_HUMAN			562.8	0.9	1
STDKTVAVW	34.28	1005.51	9	-0.4	503.764	40.37		5870000	Q96DI7|SNR40_HUMAN			218.7	0.5	1
STDKTVRLW	31.32	1104.59	9	1	553.304	37.83		11300000	O75529|TAF5L_HUMAN			115.7	0.3	1
STDRHIRLW	38.81	1182.63	9	1.4	395.216	34.44	5600000	101000000	Q9GZL7|WDR12_HUMAN			114.2	0.3	1
STKRKAAVW	19.99	1045.6	9	-0.6	349.541	17.4		4710000	P21359|NF1_HUMAN			31	0.09	1
STKSIHANF	25.69	1003.51	9	-1.9	502.761	23.37	142000	375000	Q8IWZ3|ANKH1_HUMAN			2877.4	3	0
STLPPRTYW	17.72	1119.57	9	0.5	560.793	46.13		299000000	Q9Y520|PRC2C_HUMAN			9.7	0.015	1
STQIKTYSW	29.91	1112.55	9	0.6	557.283	43.49		1630000	P20336|RAB3A_HUMAN			33.4	0.1	1
STRGISQLW	22.04	1046.55	9	0.9	524.283	51.78	2870000	65200000	Q96HA1|P121A_HUMAN:A8CG34|P121C_HUMAN			10.2	0.015	1
STTDVEKSF	53.51	1012.47	9	1.2	507.244	32.87	51700000	21100000	Q53EL6|PDCD4_HUMAN			1680.3	1.9	1
STWHVARTF	26.18	1103.55	9	-0.6	552.783	36.96		5340000	Q8NBI5|S43A3_HUMAN			66.6	0.2	1
STYVIRDEW	28.85	1167.56	9	0.8	584.786	51.61		3590000	Q5VWG9|TAF3_HUMAN			33.5	0.1	1
SVKRNQAVW	16.78	1086.59	9	0.9	544.304	23.06		2640000	Q6ZNB6|NFXL1_HUMAN			132.9	0.4	1
SVM(+15.99)KHRFLF	19.71	1179.62	9	2	394.216	32.25	3460000	1990000	P17174|AATC_HUMAN	Oxidation (M)	M3:Oxidation (M):1000.00	3370.4	3.5	0
SVRANTENW	15.07	1075.5	9	-0.8	538.759	29.86		2140000	Q9NZJ4|SACS_HUMAN			845.2	1.2	1
SVRPPKKSW	30.4	1083.62	9	-2.2	362.213	20.21		11100000	Q9NTJ3|SMC4_HUMAN			55.7	0.175	1
SVSSIVRQW	20.57	1060.57	9	0.7	531.291	50.85		820000	O75037|KI21B_HUMAN			127.3	0.4	1
SVTEIQEKW	44.23	1118.56	9	-0.5	560.287	45.05	6270000	130000000	Q9NR30|DDX21_HUMAN			275.5	0.6	1
TAKALQAHW	26.8	1024.55	9	-2.1	342.522	28.57		13000000	Q96EZ8|MCRS1_HUMAN			12.6	0.025	1
TAKISDFSW	44.36	1053.51	9	-0.5	527.764	56.89	9160000	92400000	Q09028|RBBP4_HUMAN:Q16576|RBBP7_HUMAN			25.6	0.07	1
TAKITSVAW	32.04	975.539	9	0.5	488.777	45.6		10900000	Q8TEQ6|GEMI5_HUMAN			116.2	0.3	1
TALPLLKQF	36.73	1029.62	9	0.9	515.819	64.05	8160000	12500000	Q9Y2P8|RCL1_HUMAN			32.2	0.1	1
TIKKETDVF	17.27	1079.59	9	-2.1	540.799	24.91	1650000	1220000	P35251|RFC1_HUMAN			18958	20	0
TLREVQERW	30.69	1215.64	9	0.7	406.219	34.61		3150000	Q96EZ8|MCRS1_HUMAN			439.6	0.8	1
TLTKDEKVF	12.92	1079.59	9	-2.1	540.799	24.91		795000	Q9HD20|AT131_HUMAN			12609.1	11	0
TSFPHESTF	10.21	1051.46	9	1.4	526.739	41.86		640000	Q86WP2|GPBP1_HUMAN			62.9	0.2	1
TSKITSTAW	32.2	993.513	9	0.9	497.764	35.55		5920000	Q9UKA1|FBXL5_HUMAN			53.9	0.175	1
TSKPFNPLL	16.13	1015.57	9	-0.9	508.792	50.97		4050000	P22059|OSBP1_HUMAN			1400.4	1.7	1
TSKPVQM(+15.99)M(+15.99)F	42.85	1099.5	9	0.1	550.759	28.14	57300000	64800000	P48595|SPB10_HUMAN	Oxidation (M)	M7:Oxidation (M):1000.00;M8:Oxidation (M):1000.00	5064.4	4.5	0
TSKPVQM(+15.99)MF	27.56	1083.51	9	-0.2	542.762	36.63	2000000	6750000	P48595|SPB10_HUMAN	Oxidation (M)	M7:Oxidation (M):40.00	366.3	0.7	1
TSKPVQMM(+15.99)F	30.1	1083.51	9	1.3	542.763	39.49	5470000	12300000	P48595|SPB10_HUMAN	Oxidation (M)	M8:Oxidation (M):30.46	364	0.7	1
TSLFIARSF	12.82	1040.57	9	1.1	521.291	59.6	1250000	2200000	Q14008|CKAP5_HUMAN			104.1	0.3	1
TSQDVLHSW	40.58	1071.5	9	0.1	536.757	47.03		18400000	P00403|COX2_HUMAN			28.3	0.08	1
TSRKNTPHF	27.82	1086.56	9	0.6	363.193	16.92	2120000	2690000	Q14684|RRP1B_HUMAN			996.5	1.3	1
TSVPDHVVW	34.43	1038.51	9	0.2	520.264	50.4		15700000	P13164|IFM1_HUMAN:Q01629|IFM2_HUMAN:Q01628|IFM3_HUMAN			19.8	0.05	1
TSVTPRPSW	20.34	1029.52	9	0.2	515.769	38.04		887000	Q9Y2Y4|ZBT32_HUMAN			36.8	0.125	1
TTAPEFRRW	24.06	1162.59	9	-0.3	388.537	36.5		37300000	P22695|QCR2_HUMAN			26.8	0.07	1
TTHNIPQTF	40.23	1057.52	9	-0.1	529.767	37.4	19300000	24700000	Q13029|PRDM2_HUMAN			434.5	0.8	1
TTIVLGRRF	12.44	1061.63	9	0.2	354.885	39.72		1550000	Q9GZU3|TM39B_HUMAN			221.1	0.5	1
TTKINTFNW	14.71	1123.57	9	-0.3	562.79	53.05		1470000	O94887|FARP2_HUMAN			74.5	0.25	1
TTKPDLLAW	24.13	1043.57	9	-1.1	522.789	59.06		20500000	O00257|CBX4_HUMAN			45.9	0.15	1
TTKRPNTFF	32.86	1110.58	9	-2.2	556.297	31.02	2820000	1530000	Q02543|RL18A_HUMAN			658.4	1	1
TTKSTVNKW	47.95	1063.57	9	0	532.79	19.09		57300000	Q8TAF3|WDR48_HUMAN			23.8	0.06	1
TTLEHQKTF	58.64	1103.56	9	1.7	552.789	24.09	37100000	50000000	Q13347|EIF3I_HUMAN			144.4	0.4	1
TTLVDNNTW	34.46	1062.5	9	-0.3	532.256	55.42		39200000	Q8TCJ2|STT3B_HUMAN			7.2	0.01	1
TTRELQQYW	17.34	1223.59	9	-0.3	612.804	49.3		10600000	Q7Z614|SNX20_HUMAN			10.8	0.02	1
TTRGLDPLF	13.27	1018.54	9	-0.1	510.28	54.9	3490000	7170000	Q96HW7|INT4_HUMAN			472.9	0.8	1
TTSKPVRKW	32.05	1101.63	9	-0.7	368.217	16.78		20200000	Q8IWZ6|BBS7_HUMAN			25.6	0.07	1
TTSRVLKVL	30.83	1015.64	9	2.2	508.828	32.7	8720000	10100000	P35222|CTNB1_HUMAN:P14923|PLAK_HUMAN			674.9	1	1
TVKISNYGW	35.79	1066.54	9	0.3	534.28	51.71	1140000	26200000	Q9HB71|CYBP_HUMAN			203.8	0.5	1
TVYPKPEEW	30.39	1147.55	9	-0.3	574.784	46.26	0	35100000	P19387|RPB3_HUMAN			178.6	0.5	1
V(+42.01)GSRTIAAW	10.5	1001.53	9	-0.4	501.772	36.56		2400000	Q8WUT4|LRRN4_HUMAN	Acetylation (N-term)	V1:Acetylation (N-term):1000.00	401.3	0.8	1
V(+42.01)MLLAALSW	10.71	1044.57	9	0.2	523.291	56.05		378000	P37268|FDFT_HUMAN	Acetylation (N-term)	V1:Acetylation (N-term):1000.00	294	0.6	1
V(+42.01)SPKTLLTF	11.36	1046.6	9	-0.5	524.308	68.51	2300000	5670000	Q9H6S0|YTDC2_HUMAN	Acetylation (N-term)	V1:Acetylation (N-term):1000.00	9744.9	8.5	0
VAHTIKQAW	21.98	1052.58	9	5	527.298	27.8		9140000	Q95460|HMR1_HUMAN			53.9	0.175	1
VAKEC(+119.00)ADLW	24.72	1152.49	9	-0.3	577.254	39.23		17000000	P62829|RL23_HUMAN	Cysteinylation	C5:Cysteinylation:1000.00	208.2	0.5	1
VAKKIHEEF	34.23	1099.6	9	0.3	550.809	20.56	3290000	762000	Q9Y2L1|RRP44_HUMAN			1681.5	1.9	1
VAKKLGEM(+15.99)W	30.04	1076.57	9	0.2	539.292	27.3		12000000	P09429|HMGB1_HUMAN:O15347|HMGB3_HUMAN:B2RPK0|HGB1A_HUMAN	Oxidation (M)	M8:Oxidation (M):1000.00	34.2	0.1	1
VAKLDTSQW	22.47	1046.54	9	1.1	524.278	43.42		3920000	O60832|DKC1_HUMAN			64	0.2	1
VAKVGQYTF	25	1011.54	9	0.3	506.777	44.8	6530000	9440000	Q86Y39|NDUAB_HUMAN			438.3	0.8	1
VARKSEEHW	12.26	1140.57	9	-0.5	381.196	17.65		2450000	Q8TAT5|NEIL3_HUMAN			26.5	0.07	1
VATKKAQEW	10.63	1059.57	9	0.8	530.793	19.92		367000	P23458|JAK1_HUMAN			128.3	0.4	1
VATQAKFTF	13.77	1011.54	9	0.3	506.777	44.8	5250000	3400000	Q6ZUA9|MROH5_HUMAN			874.3	1.2	1
VAVLLSRTW	13.31	1043.61	9	1.4	522.814	57.5		706000	Q92616|GCN1_HUMAN			18	0.04	1
VIKNLQSRW	22.78	1142.66	9	-0.2	381.892	33.23		9400000	Q5UIP0|RIF1_HUMAN			510.8	0.9	1
VSAGIQTSF	27.81	908.46	9	0.2	455.238	51.3	9590000	10300000	P17844|DDX5_HUMAN			121.2	0.4	1
VSAIVEQSW	32.78	1017.51	9	0.6	509.764	58.22	306000	5600000	P63146|UBE2B_HUMAN:P49459|UBE2A_HUMAN			10.3	0.015	1
VSAPEVSRW	28.67	1029.52	9	-0.7	515.769	43.32		1670000	Q96Q27|ASB2_HUMAN			18.5	0.04	1
VSAQIRKNF	15.74	1061.6	9	-0.7	354.873	26.67	2460000	2160000	Q8IU85|KCC1D_HUMAN			1581.2	1.8	1
VSDASKPSW	30.04	975.466	9	-1.1	488.74	30.31		5150000	Q7Z4G4|TRM11_HUMAN			166	0.4	1
VSEHQPTTW	18.14	1083.5	9	0.5	542.757	32.52		933000	P46977|STT3A_HUMAN:Q8TCJ2|STT3B_HUMAN			163	0.4	1
VSEQHEYHW	19.33	1213.52	9	0	405.512	30.49		4590000	Q7L590|MCM10_HUMAN			138.8	0.4	1
VSFAEKNGW	15.94	1036.5	9	4.1	519.258	44.36		4300000	O43181|NDUS4_HUMAN			7.4	0.01	1
VSHPNEVSW	19.51	1053.49	9	1	527.752	37.42		25200000	Q14739|LBR_HUMAN			9.6	0.015	1
VSIEERARW	20.85	1144.6	9	0.3	382.54	36.82		5020000	P55884|EIF3B_HUMAN			22.1	0.06	1
VSKAPAPTF	57.79	916.502	9	-0.1	459.258	33.5	25900000	29900000	A6NCL7|AN33B_HUMAN			512.5	0.9	1
VSKEGTEAW	23.05	1005.48	9	1.7	503.747	28.6		3010000	Q14204|DYHC1_HUMAN			345.1	0.7	1
VSKILKEEW	19.51	1130.63	9	-2.9	566.322	37.43		1160000	Q8IWR1|TRI59_HUMAN			46.9	0.15	1
VSKPDLITF	32.07	1018.57	9	1.6	510.293	55.24	72700000	92800000	Q7Z2F6|ZN720_HUMAN:Q14586|ZN267_HUMAN			364.7	0.7	1
VSKPDLITW	30.34	1057.58	9	-0.4	529.798	56.35		30200000	Q03936|ZNF92_HUMAN			21.3	0.05	1
VSKPSAPVF	45.78	930.518	9	-1.7	466.265	38.29	35600000	42100000	Q69YN4|VIR_HUMAN			601.1	1	1
VSKRLHQRF	38.32	1169.68	9	-0.2	390.9	17.33	20400000	24700000	Q96ST3|SIN3A_HUMAN			187.8	0.5	1
VSKSVTQGF	52.45	951.503	9	2	476.76	30.35	9830000	12800000	Q92599|SEPT8_HUMAN			1122.7	1.4	1
VSKTLPSTW	33.08	1017.55	9	2	509.783	42.39		6720000	Q14677|EPN4_HUMAN			25.3	0.07	1
VSKVEKEHW	10.83	1140.59	9	-1.5	381.204	19.15		283000	Q53H54|TYW2_HUMAN			47.4	0.15	1
VSLSAGRSW	16.35	961.498	9	-0.3	481.756	43.25		4370000	Q7Z5Q5|DPOLN_HUMAN			8.3	0.01	1
VSNDRTQTW	28.65	1105.52	9	0.2	553.765	26.18		1810000	Q9Y2H8|ZN510_HUMAN			208.7	0.5	1
VSNPKSFEY	31.43	1069.51	9	4.1	535.763	35.59	7390000	5740000	Q8IXI2|MIRO1_HUMAN			1688.8	1.9	1
VSRILQEAW	15.55	1100.6	9	-1.6	551.305	52.55		2160000	Q9UI10|EI2BD_HUMAN			22.5	0.06	1
VSRLLHLHF	15.86	1120.65	9	1.4	374.558	42.1	1820000	6060000	A8MT69|CENPX_HUMAN			395.5	0.7	1
VSRPVQVYF	23.12	1093.59	9	0.1	547.803	49.14	32700000	48000000	Q14934|NFAC4_HUMAN			33.9	0.1	1
VSRRTGEEW	13.16	1118.55	9	0.7	373.856	21.88		28900000	Q14764|MVP_HUMAN			15.2	0.03	1
VSSHVERVF	17.88	1058.55	9	0.4	530.283	29.3	3950000	4910000	Q9NX04|CA109_HUMAN			203.4	0.5	1
VSSKVQRLL	18.64	1028.63	9	-0.9	343.885	28.83	3290000	3350000	A1A4S6|RHG10_HUMAN			418.2	0.8	1
VSTRQTQSW	36.96	1091.54	9	0.1	546.775	26.42		7150000	Q96B23|CR025_HUMAN			22.9	0.06	1
VSVQNLPQW	14.05	1069.56	9	0	535.785	66.06		2540000	Q14997|PSME4_HUMAN			36.5	0.125	1
VSYKGSISY	34.44	1002.5	9	-1.3	502.258	37.38	591000	1380000	Q6SPF0|SAMD1_HUMAN			1189.2	1.5	1
VTAPEKRGW	10.82	1042.56	9	0.8	348.526	24.85		567000	P04920|B3A2_HUMAN			20.1	0.05	1
VTDNAVYHW	13.79	1103.5	9	3.4	552.761	45.96		3700000	Q00610|CLH1_HUMAN			66.3	0.2	1
VTHGTESSW	15.23	1002.44	9	0.3	502.228	25.18		1190000	Q71RC2|LARP4_HUMAN			16.6	0.04	1
VTHSVRIGF	39.03	1014.56	9	-0.3	508.288	35.57	37200000	47600000	P26010|ITB7_HUMAN			1742.3	1.9	1
VTKKIKVEF	31.57	1090.67	9	-1.3	546.344	27.03	12500000	14800000	Q8NEN9|PDZD8_HUMAN			1083.2	1.4	1
VTKKTYEIW	35.02	1166.63	9	0.8	584.324	38.11		23400000	Q14839|CHD4_HUMAN			62.2	0.2	1
VTKSTQNSF	23	1010.5	9	0.1	506.259	20.33	1300000	1760000	P46063|RECQ1_HUMAN			412.7	0.8	1
VTKSVDFHF	20.85	1078.54	9	0.3	360.522	42.39	5760000	5270000	Q9ULW0|TPX2_HUMAN			514.6	0.9	1
VTNKSVSVW	39.26	1018.54	9	0.8	510.28	37.05		23800000	Q9H974|QTRT2_HUMAN			60.7	0.175	1
VTNPHSSQW	44.7	1054.48	9	-0.1	528.249	25.74	1300000	138000000	P24522|GA45A_HUMAN			31.3	0.09	1
VTNPHTDAW	42.45	1039.47	9	0.1	520.744	30.71	3600000	186000000	O75293|GA45B_HUMAN			368.5	0.7	1
VTNPYQATI	12	1005.51	9	0.4	503.764	48.91	1310000	507000	P49005|DPOD2_HUMAN			2197.1	2.5	0
VTNTKEVKW	23.01	1103.6	9	0.8	368.873	25.74		3480000	Q92535|PIGC_HUMAN			54.1	0.175	1
VTQRLNSQW	21.68	1130.58	9	-0.1	566.299	35.45		2030000	Q86X10|RLGPB_HUMAN			14.7	0.03	1
VTRAKQIVW	18.82	1099.65	9	0.3	550.832	30.79	1700000	95300000	P00558|PGK1_HUMAN			18.7	0.04	1
VTRHEHEAW	29.62	1163.55	9	0.2	388.856	17.91		2610000	A2RRP1|NBAS_HUMAN			42	0.125	1
VTRPTGVSF	23.94	962.519	9	0.2	482.267	38.28	6120000	9110000	A5YKK6|CNOT1_HUMAN			99.5	0.3	1
VTRVITDVY	17.85	1064.59	9	0.3	533.301	42.07	2030000	3330000	Q12888|TP53B_HUMAN			2077.6	2.5	0
VTSEHTYDF	19.28	1097.47	9	-0.6	549.74	37.58	334000	1060000	P23921|RIR1_HUMAN			1372.2	1.6	1
VTSPIRASY	19.55	992.529	9	-0.1	497.272	36.56	850000	362000	P55082|MFAP3_HUMAN			165.9	0.4	1
VTTVVNPKY	47.89	1019.57	9	-1.3	510.789	34.37	9990000	11500000	P05556|ITB1_HUMAN			1614.6	1.8	1
VTYKNVPNW	49.69	1119.57	9	0.3	560.793	46.27	22700000	300000000	P62826|RAN_HUMAN			44.2	0.15	1
VTYVPVTTF	32.39	1025.54	9	0.1	513.779	66.42	8340000	11000000	P62899|RL31_HUMAN			146	0.4	1
VVM(+15.99)PIAHEF	28.02	1057.53	9	-1.5	529.77	43.4	10200000	12100000	Q9UQL6|HDAC5_HUMAN	Oxidation (M)	M3:Oxidation (M):1000.00	4615.3	4.5	0
VVMPIAHEF	16.11	1041.53	9	-1.5	521.772	54.83		1330000	Q9UQL6|HDAC5_HUMAN			641.1	1	1
VVRDNPDFW	17.41	1146.55	9	-0.4	574.28	50.74		8730000	Q9BSR8|YIPF4_HUMAN			2182.2	2.5	0
YAKRAFVHW	24.24	1176.62	9	0.7	393.214	31.43	10900000	71900000	P68363|TBA1B_HUMAN:P68366|TBA4A_HUMAN:Q71U36|TBA1A_HUMAN:P0DPH8|TBA3D_HUMAN:P0DPH7|TBA3C_HUMAN:Q9BQE3|TBA1C_HUMAN:Q9NY65|TBA8_HUMAN			74.4	0.25	1
YALRAITRY	18.24	1125.63	9	1.7	376.218	39.09	1060000	3140000	P58004|SESN2_HUMAN:Q9Y6P5|SESN1_HUMAN			184.3	0.5	1
YAVRDREM(+15.99)F	11.47	1201.55	9	-1.5	401.525	30.41		13700000	O95298|NDUC2_HUMAN:E9PQ53|NDUCR_HUMAN	Oxidation (M)	M8:Oxidation (M):1000.00	1548.1	1.8	1
YAVRDREMF	11.1	1185.56	9	-0.4	396.194	36.11		1290000	O95298|NDUC2_HUMAN:E9PQ53|NDUCR_HUMAN			1080.6	1.4	1
YSKKLLDSW	31.07	1138.6	9	-0.7	570.308	42.82		3880000	Q8N5M9|JAGN1_HUMAN			57.2	0.175	1
YSKRVYIAY	23.49	1161.62	9	0.2	581.817	33.38	2200000	5080000	Q8TCJ2|STT3B_HUMAN			5197.4	4.5	0
YSLKKRHFF	30.48	1224.68	9	-0.1	409.233	27.93	5430000	7240000	Q8IVB4|SL9A9_HUMAN:Q96T83|SL9A7_HUMAN			379.7	0.7	1
YSLLRSEKW	32.15	1180.62	9	0.1	591.319	45.2		10100000	Q9NV64|TM39A_HUMAN			27.8	0.08	1
YSQKAQNSW	18.73	1110.51	9	-0.7	556.262	26.45		2280000	Q8N9T8|KRI1_HUMAN			23.2	0.06	1
YSVRVSPQM(+15.99)	33.34	1081.52	9	3	541.77	31.93	1430000	1490000	Q9Y2P8|RCL1_HUMAN	Oxidation (M)	M9:Oxidation (M):1000.00	6052.4	5.5	0
YTDNLVRVW	46.45	1164.59	9	-0.3	583.303	58.66	8020000	63800000	P63244|RACK1_HUMAN			268.1	0.6	1
YTHEVVTLW	23.35	1146.57	9	0	574.293	58.55	3720000	20500000	P24941|CDK2_HUMAN:P06493|CDK1_HUMAN:Q00526|CDK3_HUMAN			15	0.03	1
YTHQVVTRW	27.16	1188.6	9	-0.1	397.209	31.33	338000	14000000	P50613|CDK7_HUMAN			23.3	0.06	1
YTKFQIATW	18.07	1156.59	9	1	579.304	59.57		6620000	Q15800|MSMO1_HUMAN			40.6	0.125	1
YTLRHARGY	28.2	1135.59	9	-0.2	379.537	21.81	376000	297000	Q9ULT8|HECD1_HUMAN			945.3	1.3	1
YTLRILRQL	16.43	1174.72	9	-1.7	392.579	53.48	9390000	19900000	Q96DU3|SLAF6_HUMAN			263.8	0.6	1
YTNKVITLW	16.53	1136.62	9	0.5	569.319	60.82		4630000	Q14004|CDK13_HUMAN:Q9NYV4|CDK12_HUMAN			13.3	0.025	1
YTYRGPKAF	49.69	1101.56	9	0.8	551.788	36.3	119000000	149000000	Q12874|SF3A3_HUMAN			1287.8	1.6	1
A(+42.01)ASHQGKEAW	11.46	1125.52	10	-1	563.767	29.47		4500000	Q9P219|DAPLE_HUMAN	Acetylation (N-term)	A1:Acetylation (N-term):1000.00	666.3	1	1
AAAAAAAAAW	32.68	843.424	10	0.3	422.719	45.56		2980000	Q96QS3|ARX_HUMAN			156.8	0.4	1
AAADSAVRLW	45.45	1058.55	10	0	530.283	52.7		17100000	Q6IA86|ELP2_HUMAN			98.5	0.3	1
AAALPAAALW	26.85	953.533	10	0.2	477.774	75.12		1890000	Q03518|TAP1_HUMAN			16.2	0.04	1
AAFDQRMKTW	13.56	1252.6	10	-0.3	418.541	41.22		1090000	Q13596|SNX1_HUMAN			24.9	0.07	1
AAKPEQIQKW	34.68	1197.65	10	-0.6	400.224	27.72		28300000	Q99986|VRK1_HUMAN			90.4	0.25	1
AGTLSGHASW	32.72	985.462	10	-0.5	493.738	35.91	1670000	2040000	Q9GZS3|WDR61_HUMAN			70.7	0.25	1
ALAAIRHARW	10.79	1163.67	10	1	388.897	27.33		3510000	Q12905|ILF2_HUMAN			114.8	0.3	1
AQSLGTTYIY	12.72	1115.55	10	-1	u	31.35	339000	858000	Q13085|ACACA_HUMAN			800.7	1.2	1
AQTVSPAEKW	22.01	1115.56	10	-1.4	558.787	37.58	9400000	13300000	Q16658|FSCN1_HUMAN			142.7	0.4	1
ASADGTIKLW	35.25	1060.56	10	-0.7	531.284	56.68		8850000	Q12788|TBL3_HUMAN			44.6	0.15	1
ASAGNLKPVW	40.89	1041.56	10	0.9	521.788	45.74		23200000	Q8IZ83|A16A1_HUMAN			113.7	0.3	1
ASAKTKKDNM	12.95	1092.56	10	-1.8	547.286	18.93		1350000	Q15006|EMC2_HUMAN			12556	11	0
ASARAGIHLW	12.56	1080.58	10	1.8	541.3	41.39		19400000	Q9HAY2|MAGF1_HUMAN			14.2	0.03	1
ASARGSGATW	13.06	962.457	10	-1.4	482.235	23.94		697000	P55809|SCOT1_HUMAN			44.9	0.15	1
ASDDGTVRIW	42.58	1118.54	10	-1	560.274	49.1		5880000	Q9H7D7|WDR26_HUMAN			1067.3	1.4	1
ASDDQTIRVW	45.34	1189.57	10	0.5	595.794	48.88		8770000	P53621|COPA_HUMAN			974.6	1.3	1
ASEDRSVRIW	31.48	1217.62	10	-0.7	406.879	37.03		10800000	Q9NNW5|WDR6_HUMAN			537.5	0.9	1
ASELDLMPYT	10.29	1138.52	10	0.8	380.515	48.73		3210000	Q86U86|PB1_HUMAN			12449.9	11	0
ASERDTRKLW	30.85	1260.66	10	0.6	421.227	25.22		4720000	O43913|ORC5_HUMAN			107.6	0.3	1
ASISRALNFT	12.96	1078.58	10	-0.8	540.295	37.53		156000	Q86UQ4|ABCAD_HUMAN			5671.2	5	0
ASKGREAM(+15.99)EW	22.38	1179.53	10	-0.1	590.774	20.76		3410000	Q9Y3B1|PLD3B_HUMAN	Oxidation (M)	M8:Oxidation (M):1000.00	52.1	0.175	1
ASKKLDLEAW	35.66	1159.62	10	-0.2	580.819	44.04		62900000	P49591|SYSC_HUMAN			262.8	0.6	1
ASKPATTIRW	30.45	1129.62	10	-2.6	377.548	31.94		11300000	Q9BY67|CADM1_HUMAN			47	0.15	1
ASLNLPAVSW	24.8	1056.56	10	-0.6	529.287	77.49		4380000	P35221|CTNA1_HUMAN			28.2	0.08	1
ASLSTFQQM(+15.99)W	16.33	1213.54	10	-0.3	607.779	66.08	241000	7880000	P60709|ACTB_HUMAN:P68133|ACTS_HUMAN:P68032|ACTC_HUMAN:P0CG39|POTEJ_HUMAN:Q6S8J3|POTEE_HUMAN:A5A3E0|POTEF_HUMAN:P0CG38|POTEI_HUMAN:Q562R1|ACTBL_HUMAN	Oxidation (M)	M9:Oxidation (M):1000.00	14.8	0.03	1
ASTAIAAAQW	32.74	988.498	10	-0.1	495.256	54.7		5040000	P98175|RBM10_HUMAN:P52756|RBM5_HUMAN			26.9	0.07	1
ASTDGHLRVW	36.62	1140.57	10	-0.5	381.196	36.31		4840000	Q15061|WDR43_HUMAN			377.1	0.7	1
ASTDKTVAVW	28.99	1076.55	10	-0.5	539.282	41.22		4610000	Q96DI7|SNR40_HUMAN			159.9	0.4	1
ASVTEIQEKW	35.32	1189.6	10	-1	595.806	46.39	5160000	4370000	Q9NR30|DDX21_HUMAN			57.4	0.175	1
ATGGRIVPRF	20.23	1072.61	10	0.9	358.546	33.9	4520000	6420000	P48643|TCPE_HUMAN			4005	4	0
ATKALGGEGW	18.58	988.498	10	0.1	495.256	36.69		555000	Q8NFF5|FAD1_HUMAN			204.8	0.5	1
ATKVLGTVKW	48.97	1101.65	10	-0.9	551.834	39.63		82400000	P16989|YBOX3_HUMAN:P67809|YBOX1_HUMAN			68	0.2	1
ATPSAATVTW	20.75	1003.5	10	-1.4	502.755	40.37		1110000	Q5VST9|OBSCN_HUMAN			50.3	0.15	1
ATRDELPYTF	15.03	1211.58	10	1.7	606.799	55.17	5490000	9870000	P78316|NOP14_HUMAN			952.9	1.3	1
ATRKHGTDLW	45.34	1183.61	10	0.6	592.812	21.71		68800000	Q9NP61|ARFG3_HUMAN			61.1	0.2	1
ATSGDYLRVW	38.01	1166.57	10	0.3	584.293	57.96	800000	8010000	P61962|DCAF7_HUMAN			111.7	0.3	1
ATSTEKSVAW	28.06	1078.53	10	0.1	540.272	31.83		3740000	Q8WZ64|ARAP2_HUMAN			237	0.5	1
AVNKM(+15.99)DQVNW	13.55	1219.57	10	-1.6	610.789	34.48		3490000	Q9Y450|HBS1L_HUMAN	Oxidation (M)	M5:Oxidation (M):1000.00	108.9	0.3	1
AVTALAARTW	38.74	1058.59	10	-0.4	530.301	47.34	1910000	28300000	Q9UII2|ATIF1_HUMAN			44.7	0.15	1
C(+119.00)SDDRTVRIW	15.74	1368.59	10	0.3	457.205	38.35		876000	O76071|CIAO1_HUMAN	Cysteinylation	C1:Cysteinylation:1000.00	537.7	0.9	1
C(+42.01)GKEFSWSAG	12.45	1112.46	10	-0.1	557.237	37.14		18100000	Q14590|ZN235_HUMAN	Acetylation (N-term)	C1:Acetylation (N-term):1000.00	1831.3	2	1
ESARREIALW	15.72	1229.65	10	0.2	410.891	45.01		3610000	Q13232|NDK3_HUMAN			50.8	0.15	1
ESSRDASRKW	11.63	1220.59	10	0.8	407.871	17.3		355000	Q8TCU6|PREX1_HUMAN			154	0.4	1
ETKKDHPYTW	17.24	1303.62	10	-0.7	652.817	23.43		5910000	Q9Y570|PPME1_HUMAN			341.1	0.7	1
FSRHTKAIVW	23.15	1243.68	10	0.1	415.568	30.49		11800000	P53396|ACLY_HUMAN			62.6	0.2	1
FTLREVQERW	14.1	1362.7	10	-0.9	455.242	54.09		1720000	Q96EZ8|MCRS1_HUMAN			19.2	0.05	1
GALRVLNSYW	16.28	1177.62	10	0.8	589.82	65.04		3450000	P61313|RL15_HUMAN			15.7	0.04	1
GASLVLQVSY	10.39	1035.56	10	-0.7	518.787	36.7		592000	O75923|DYSF_HUMAN			838.3	1.2	1
GSADKTVALW	32.94	1046.54	10	1.7	524.278	50.09		16500000	Q09028|RBBP4_HUMAN:Q16576|RBBP7_HUMAN			47.3	0.15	1
GSLQEGHRLW	38.92	1181.59	10	-0.4	591.804	36.96		6790000	Q96H35|RBM18_HUMAN			25.2	0.07	1
GSRSVLGTGW	11.19	1018.52	10	-0.9	510.267	46.96		733000	Q9Y4D8|HECD4_HUMAN			45.6	0.15	1
GSSDSTVRVW	42.49	1092.52	10	-0.5	547.267	39.47		9560000	Q9UKB1|FBW1B_HUMAN:Q9Y297|FBW1A_HUMAN			91.6	0.25	1
GSWDQTVKLW	14.24	1218.6	10	0.3	610.309	68.11		1770000	O43684|BUB3_HUMAN:O00628|PEX7_HUMAN			22.3	0.06	1
GTALQEISFW	19.52	1150.57	10	-0.4	576.29	53.93	7370000	27000000	Q14204|DYHC1_HUMAN			109.8	0.3	1
GTDRNHNRYW	40.73	1317.6	10	0.1	440.206	21.29		2580000	Q9UIG0|BAZ1B_HUMAN			98.2	0.3	1
GTFTNQIHKW	48.44	1230.61	10	0.9	616.315	38.04		31300000	A5PLL7|TM189_HUMAN			9.1	0.015	1
GTKKYDLSKW	42.46	1224.65	10	-1.3	409.224	30.18		5350000	Q9UM54|MYO6_HUMAN			151.7	0.4	1
GTLKIANKQF	28.98	1118.64	10	-0.3	560.33	32.56	1790000	2190000	P27694|RFA1_HUMAN			272.6	0.6	1
H(+42.01)NLEISDVAW	14.29	1224.58	10	-1.7	613.295	42.92		1450000	Q86VZ2|WDR5B_HUMAN	Acetylation (N-term)	H1:Acetylation (N-term):1000.00	140.3	0.4	1
HAIPSRMTIG	19.24	1081.57	10	0.2	541.793	33.62	6720000	7810000	P30876|RPB2_HUMAN			973	1.3	1
HAKPIQDVQW	17.39	1220.63	10	-0.5	611.322	36.91		2100000	Q9BZH6|WDR11_HUMAN			11.6	0.02	1
HALPRPTGSF	13.4	1081.57	10	-0.5	541.79	32.76	4290000	11600000	A0A096LP49|CC187_HUMAN			263.3	0.6	1
HGKPVTQVTW	39.66	1151.61	10	0.2	576.812	30.73		22200000	Q14137|BOP1_HUMAN			86	0.25	1
HSAHTKLQTW	39.64	1207.61	10	-0.5	604.812	20.23		9610000	Q96MD2|CL066_HUMAN			19.3	0.05	1
HSAKVHSVAW	36.19	1120.58	10	-0.1	374.533	21.18		19600000	Q96J01|THOC3_HUMAN			24.7	0.07	1
HSAPGRGVVW	11.7	1064.55	10	0	533.283	30.42		375000	Q86UW9|DTX2_HUMAN			31.6	0.09	1	Strong binders
HSAVVEDVAW	35.29	1111.53	10	0.3	556.772	49.72		9120000	Q16576|RBBP7_HUMAN			27.7	0.08	1
HSGDHGKRLF	45.74	1152.58	10	-0.3	385.2	17.37	4370000	3820000	O43674|NDUB5_HUMAN			2319.3	2.5	0
HSGPVVAM(+15.99)VW	25.2	1097.53	10	0.3	549.774	47.56		30300000	P15531|NDKA_HUMAN	Oxidation (M)	M8:Oxidation (M):1000.00	11.2	0.02	1
HSGPVVAMVW	10.22	1081.54	10	0.5	541.777	58.69		890000	P15531|NDKA_HUMAN			12.6	0.025	1
HSITSDNHKW	44.99	1223.57	10	0.2	408.863	20.3		4910000	Q8NEM7|SP20H_HUMAN			13.7	0.03	1
HSKPEDTDTW	19.83	1214.52	10	0.2	608.268	23.14		3290000	P51523|ZNF84_HUMAN			19.9	0.05	1
HSLSWALR(+.98)GY	17.18	1189.59	10	-1.5	397.536	45.97		223000	Q9NNW5|WDR6_HUMAN	Citrullination	R8:Citrullination:1000.00	268.5	0.6	1
HSM(+15.99)SDPGVSY	19.39	1094.43	10	1.4	548.225	27.11	12200000	12900000	P29803|ODPAT_HUMAN:P08559|ODPA_HUMAN	Oxidation (M)	M3:Oxidation (M):1000.00	185.1	0.5	1
HSRLQDSQLW	19.43	1268.63	10	0.7	423.883	39.75		14900000	Q92621|NU205_HUMAN			15	0.03	1
HSVTRQLAQF	17.48	1185.63	10	-1	396.215	33.62		1740000	Q96GQ7|DDX27_HUMAN			140.8	0.4	1
HTADVQLHAW	27.11	1176.57	10	0.5	589.291	38.08		3110000	Q8IWT0|ARCH_HUMAN			25.4	0.07	1
HTAKISDFSW	44.3	1190.57	10	-1.5	596.292	47.72	1650000	24100000	Q09028|RBBP4_HUMAN:Q16576|RBBP7_HUMAN			8.6	0.01	1
HTAKITSVAW	32.61	1112.6	10	0	557.306	35.5		5310000	Q8TEQ6|GEMI5_HUMAN			22.4	0.06	1
HTAPPENKTW	42.04	1179.57	10	0.8	590.791	21.9		5780000	Q6N021|TET2_HUMAN			9.5	0.015	1
HTAVVEDVSW	50.15	1141.54	10	0.5	571.778	50.1	5340000	34500000	Q09028|RBBP4_HUMAN			10.8	0.02	1
HTFQNDIHVY	48.61	1272.59	10	0.6	637.302	39.67	28000000	38800000	Q15392|DHC24_HUMAN			86.6	0.25	1
HTGPVLDVC(+119.00)W	14.97	1244.53	10	0.8	623.274	58.83		1520000	P78406|RAE1L_HUMAN	Cysteinylation	C9:Cysteinylation:1000.00	9.7	0.015	1
HTKRVGIVAW	12.22	1165.67	10	0	389.565	32.45		7260000	P31146|COR1A_HUMAN			19	0.05	1
HTKSLTDKGF	12.74	1132.59	10	1.2	567.302	27.51		853000	Q5CZC0|FSIP2_HUMAN			1011.6	1.3	1
HTLDDRTQLW	29.5	1283.63	10	1.5	642.821	44.33		37600000	Q9BXP5|SRRT_HUMAN			21.3	0.05	1
HTNEVNAIKW	29.74	1210.61	10	1	606.313	37.54		5910000	O60907|TBL1X_HUMAN:Q9BQ87|TBL1Y_HUMAN:Q9BZK7|TBL1R_HUMAN			21	0.05	1
IAANEENRKW	35.53	1229.62	10	0.1	615.815	25.29	450000	60400000	O75368|SH3L1_HUMAN			30.8	0.09	1
IAFR(+.98)SSTKKS	10.31	1124.62	10	-0.5	375.88	22.9		864000	Q13740|CD166_HUMAN	Citrullination	R4:Citrullination:1000.00	4599.3	4	0
IAVDPR(+.98)HLSL	14.37	1120.62	10	-0.8	374.548	28.03	2300000	995000	O95602|RPA1_HUMAN	Citrullination	R6:Citrullination:1000.00	7751.8	6.5	0
IAVHIAHRDW	15.91	1216.65	10	-0.8	406.556	33.9		2180000	Q96DE9|CX04B_HUMAN:Q8TE69|CX04A_HUMAN			12.4	0.025	1
ISASSLTSKW	40.21	1078.57	10	-0.1	540.29	50.4	485000	12500000	Q6PIW4|FIGL1_HUMAN			21.9	0.06	1
ISATEVDSRW	30.7	1162.56	10	-0.9	582.288	46.33		4100000	Q9UPN3|MACF1_HUMAN			29.9	0.09	1
ISDPYKVYRI	13.74	1252.68	10	2.6	418.569	45.26		541000	Q15306|IRF4_HUMAN			4347.2	4	0
ISFHNIHNTF	48.06	1228.6	10	-0.9	615.306	44.1	54500000	81700000	O43684|BUB3_HUMAN			29.5	0.09	1
ISGSLYDDDV	12.32	1082.48	10	-0.5	542.245	29.5		1530000	O94953|KDM4B_HUMAN			14715.3	14	0
ISKQDAQELF	21.53	1177.6	10	0.4	589.807	46.13	4290000	3110000	Q9BZJ0|CRNL1_HUMAN			549.6	0.9	1
ISNPEHLTEW	38.48	1224.58	10	0	613.296	49.41		22300000	Q8IY21|DDX60_HUMAN			27.7	0.08	1
ISQPASGNTF	50.73	1020.49	10	-0.3	511.251	39.31	62400000	76800000	Q14157|UBP2L_HUMAN			411.7	0.8	1
ISRIHLVDKW	16.22	1265.72	10	0.5	422.916	40.92		997000	Q8WTV0|SCRB1_HUMAN			25.9	0.07	1
ISSIKGAEEW	31.18	1118.56	10	0.7	560.288	43.59		5410000	Q9GZL7|WDR12_HUMAN			55.3	0.175	1
ITAENVAKKW	47.45	1158.64	10	-0.8	580.327	33.55		72100000	Q9BWD1|THIC_HUMAN			13.1	0.025	1
ITFPNKEIAW	15.76	1217.64	10	-0.6	609.829	63.11		3580000	Q96IZ5|RBM41_HUMAN			10.2	0.015	1
ITKADAAEFW	39.11	1150.57	10	1	576.291	53.76	7370000	60100000	Q13191|CBLB_HUMAN:P22681|CBL_HUMAN			22.5	0.06	1
ITKEIEANEW	43.14	1231.61	10	0.9	616.812	43.43		35200000	O75410|TACC1_HUMAN			23.3	0.06	1
ITKGYVIRLY	32.48	1224.72	10	-0.6	409.248	47.55	9590000	14700000	Q9BUB7|TMM70_HUMAN			686.7	1.1	1
ITKPPDGSAF	43.62	1031.53	10	-0.3	516.771	37.17	5830000	7380000	Q8N697|S15A4_HUMAN			1779	1.9	1
ITKQVPNESF	45.42	1161.6	10	-1.3	581.808	35	4150000	4570000	Q99733|NP1L4_HUMAN			1276.1	1.6	1
ITSQDVLHSW	48.79	1184.58	10	1.4	593.299	57.16	31200000	328000000	P00403|COX2_HUMAN			13.3	0.025	1
ITTEGKLWSW	27.86	1219.62	10	1.2	610.82	64.56		4950000	Q9P258|RCC2_HUMAN			23.3	0.06	1
ITTKAISRWS	15.37	1161.65	10	0.3	581.833	33.1	0	4380000	P49368|TCPG_HUMAN			114.7	0.3	1
ITVDGKPPTW	16.89	1112.59	10	-0.1	557.301	48.79		1690000	O95573|ACSL3_HUMAN			78.8	0.25	1
KAAEAAASAY	39.87	951.466	10	0.2	476.74	20.9	1940000	2290000	Q969T9|WBP2_HUMAN			1046.4	1.4	1
KAAPGWLKRF	26.38	1172.68	10	0.7	391.901	35.62		1900000	Q9NPB0|SMDC1_HUMAN			64.7	0.2	1
KADEVLAEVT	10.99	1073.56	10	-2.3	537.786	33.7		134000	Q96JB1|DYH8_HUMAN			15706.7	15	0
KAFDEKKQKW	46.19	1306.7	10	-1.5	436.574	18.96		7910000	Q53T94|TAF1B_HUMAN			17.9	0.04	1
KAGQVVTIWA	10.73	1071.61	10	0	536.811	50.72	4100000	5910000	P02545|LMNA_HUMAN			170	0.4	1
KAHPPELKKF	47.31	1193.69	10	-0.8	398.904	21.15	87000000	103000000	P62308|RUXG_HUMAN:A8MWD9|RUXGL_HUMAN			108.5	0.3	1
KAHQVKNHM(+15.99)W	11.03	1293.64	10	-0.1	432.221	15.99		416000	P11388|TOP2A_HUMAN	Oxidation (M)	M9:Oxidation (M):1000.00	11.8	0.02	1
KAIRLEVLDA	14.74	1126.67	10	0.5	564.343	40.74	2100000	3580000	Q4G0P3|HYDIN_HUMAN			4212.3	4	0
KAKM(+15.99)TDFDRF	29.01	1273.61	10	-0.2	425.545	25.98	574000	358000	P50914|RL14_HUMAN	Oxidation (M)	M4:Oxidation (M):1000.00	920.7	1.3	1
KAKQNDQVSF	11.74	1163.59	10	-1.2	582.803	22.71		219000	Q86UP2|KTN1_HUMAN			767.6	1.1	1
KAKRSDELSF	14.54	1179.62	10	0.9	394.216	23.7	4040000	1930000	P16885|PLCG2_HUMAN			311.3	0.6	1
KALADVEVTY	30.53	1107.58	10	0	554.798	46.35	10300000	9950000	P52888|THOP1_HUMAN			80.4	0.25	1
KALELDSNLY	22.54	1164.6	10	0.5	583.309	51.75	1060000	1870000	P35579|MYH9_HUMAN			259.5	0.6	1
KALNHLREIW	31.02	1278.72	10	-1.1	427.247	37.26		1750000	O43663|PRC1_HUMAN			15.4	0.03	1
KALQDVQIRF	20.87	1216.69	10	0.3	609.354	47.41	3460000	6340000	Q6P2E9|EDC4_HUMAN			155.5	0.4	1
KAM(+15.99)MEEIAGF	11.76	1141.51	10	-1.7	571.764	32.76		289000	Q8NF91|SYNE1_HUMAN	Oxidation (M)	M3:Oxidation (M):0.00	146.2	0.4	1
KARPIPRSTY	15.75	1187.68	10	0.5	396.9	19.7	1640000	2400000	Q3B820|F161A_HUMAN			147.7	0.4	1
KARREAKVKF	33.6	1231.75	10	0	411.591	15.6	17300000	14900000	P61353|RL27_HUMAN			107.4	0.3	1
KARVETQNHW	27.44	1267.64	10	-0.8	423.554	18.61	769000	77600000	P28066|PSA5_HUMAN			13.5	0.025	1
KASEAERQKW	24.54	1231.63	10	-2.7	411.55	17.71		667000	Q9HBM0|VEZA_HUMAN			16.4	0.04	1
KAVDIVKQVW	53.32	1184.69	10	-0.5	593.353	47.88	5810000	71000000	Q460N5|PAR14_HUMAN			21.7	0.05	1
KAVIDLNNRW	32.91	1227.67	10	-0.4	410.231	45.44	1110000	28600000	P0DN76|U2AF5_HUMAN:Q01081|U2AF1_HUMAN			17	0.04	1
KAWNDIKKVY	40.2	1263.7	10	0.8	422.24	31.62		13200000	P36578|RL4_HUMAN			117.4	0.3	1
KAWRGTLARW	17.72	1243.69	10	-0.3	415.572	33.81		7280000	B0I1T2|MYO1G_HUMAN			5.7	0.01	1
KAYGPKVDIW	38.99	1175.63	10	2.2	588.825	44.73		15200000	O75914|PAK3_HUMAN:Q13177|PAK2_HUMAN:Q13153|PAK1_HUMAN			22.9	0.06	1
KAYSVQGDKW	15.05	1180.59	10	2.4	591.303	30.46		896000	Q9UGP5|DPOLL_HUMAN			13.1	0.025	1
KESVRGQDIF	14.76	1177.61	10	1.3	393.544	31.59		202000	Q14558|KPRA_HUMAN			906	1.2	1
KGFSEEHNTW	45.32	1233.54	10	-0.2	617.778	29.45	5490000	116000000	P45973|CBX5_HUMAN			18	0.04	1
KGLWDSIKSF	17.31	1179.63	10	-2.5	394.216	23.7	4250000	1590000	Q9NYU1|UGGG2_HUMAN			3559.4	3.5	0
KGWPAVAQSW	12.64	1128.57	10	3.2	565.295	56.78		1330000	Q8IYB1|M21D2_HUMAN			16.1	0.04	1
KGWSHIHNTW	10.29	1264.61	10	1.5	422.545	28.89		1470000	O14646|CHD1_HUMAN			19.9	0.05	1
KGYTKSIDIW	10.63	1209.64	10	0.4	404.221	41.6		469000	P27361|MK03_HUMAN:P28482|MK01_HUMAN			266	0.6	1
KIYPGHGRRY	33.45	1245.67	10	0.1	416.232	16.68	193000000	266000000	P83731|RL24_HUMAN			5379.3	5	0
KLFDHAVSKF	16.06	1190.64	10	-0.9	397.889	37.61	1930000	840000	O60488|ACSL4_HUMAN			6016.8	5.5	0
KLKKPEAVRW	32.08	1253.76	10	-0.2	418.928	23.44		24800000	Q9Y2Z0|SGT1_HUMAN			341.4	0.7	1
KLM(+15.99)PGRIQLW	10.62	1256.71	10	0.9	629.361	51.21		1370000	A0AV96|RBM47_HUMAN	Oxidation (M)	M3:Oxidation (M):1000.00	63.6	0.2	1
KLVLAAASLL	10.8	997.654	10	0	499.834	40.8	766000	928000	Q9NUA8|ZBT40_HUMAN			4126.9	4	0
KM(+15.99)VEAAKGAA	13.96	990.517	10	-4.4	496.264	23.79		304000	Q9Y490|TLN1_HUMAN	Oxidation (M)	M2:Oxidation (M):1000.00	22503.8	27	0
KR(+.98)AIQAKDTF	12.87	1177.65	10	-1.1	589.829	28.12		413000	Q9UHD0|IL19_HUMAN	Citrullination	R2:Citrullination:1000.00	4095.7	4	0
KRSSGLTAVW	13.09	1103.61	10	1.3	552.812	29.79		1040000	P53621|COPA_HUMAN			19	0.05	1
KSAASEQHVF	19.69	1102.54	10	0.4	552.278	22.7	620000	1420000	Q92620|PRP16_HUMAN			50.2	0.15	1
KSAEAVGVKI	54.64	1000.59	10	-0.7	501.303	26.8	16600000	20700000	P27694|RFA1_HUMAN			1157.5	1.5	1
KSAEHFKRKF	45.23	1276.7	10	-0.5	426.575	16.95	2880000	3960000	Q8IXW5|RPAP2_HUMAN			177.2	0.5	1
KSAEKEISLW	38.01	1189.63	10	0.1	595.824	42.55		42700000	P22392|NDKB_HUMAN			17.9	0.04	1
KSALIIQKHW	31.81	1222.72	10	0.3	408.58	31.3	568000	10300000	Q15051|IQCB1_HUMAN			7.2	0.01	1
KSAPSDSLTY	20.39	1067.51	10	0.1	534.764	31.44	7860000	9050000	Q15042|RB3GP_HUMAN			264.8	0.6	1
KSARVKGLSF	19.54	1091.64	10	-1.9	546.829	25.22	6020000	248000	P53621|COPA_HUMAN			84.5	0.25	1
KSDDSQPTVW	19.82	1161.53	10	0.8	581.773	37.84		547000	Q8NEM7|SP20H_HUMAN			203.6	0.5	1
KSEALKDRHW	32.92	1268.66	10	0.6	423.895	19.76		4010000	Q14204|DYHC1_HUMAN			51.4	0.15	1
KSEDGR(+.98)LIYT	12.18	1181.59	10	-2.5	394.87	25.75		49900	Q9BUB7|TMM70_HUMAN	Citrullination	R6:Citrullination:1000.00	1724.7	1.9	1
KSELEFETLK	14.41	1222.64	10	2.2	408.556	36.01	660000	353000	Q5JSH3|WDR44_HUMAN			5829.8	5	0
KSFEGNVFM(+15.99)Y	13.97	1236.55	10	-1.6	619.28	54.07		14200000	Q9NV96|CC50A_HUMAN	Oxidation (M)	M9:Oxidation (M):1000.00	46.5	0.15	1
KSFEKAKESW	42.89	1238.63	10	0.4	620.322	22.26	1060000	80200000	Q02790|FKBP4_HUMAN:Q13451|FKBP5_HUMAN			8.1	0.01	1
KSFPARLRQY	22.58	1264.7	10	-1.6	422.575	26.17	13100000	16900000	Q14204|DYHC1_HUMAN			27	0.08	1
KSFSDLFKRF	24.59	1273.68	10	0.5	425.568	55.09	1920000	6560000	Q9Y6A5|TACC3_HUMAN			24	0.06	1
KSFSDTLKTY	51.76	1188.6	10	0.5	595.309	37.86	25700000	29800000	Q9BUL8|PDC10_HUMAN			38.7	0.125	1
KSFSESGINY	12.63	1130.52	10	-0.6	566.269	39.72	1240000	1910000	O60762|DPM1_HUMAN			390.8	0.7	1
KSGLKTFQTL	11.31	1121.64	10	-0.3	374.889	37.76		2930000	A4UGR9|XIRP2_HUMAN			994.6	1.3	1
KSGPVVSLGW	34.49	1028.57	10	0.6	515.29	55.33	2890000	41900000	Q9H269|VPS16_HUMAN			15.4	0.03	1
KSHYDEAYKW	33.79	1325.6	10	0.6	442.875	29.76	256000	8850000	Q92624|APBP2_HUMAN			7.7	0.01	1
KSIEFLSSKW	12.57	1223.65	10	-1.4	612.834	52.34		2660000	Q9Y2Z2|MTO1_HUMAN			14.3	0.03	1
KSIGLRLAGG	10.92	970.592	10	-0.3	486.303	30.55		2490000	O95049|ZO3_HUMAN			2298.6	2.5	0
KSINSEVLKF	17.87	1163.65	10	-1	582.834	42.52	1890000	2290000	Q7Z333|SETX_HUMAN			117.6	0.3	1
KSIQEVQKRF	25.93	1261.71	10	0.2	421.579	23.21	652000	944000	P42285|MTREX_HUMAN			79.3	0.25	1
KSITEINANF	40.74	1135.59	10	-1.7	568.8	47.29	8850000	11600000	Q8IVF6|AN18A_HUMAN:A2A2Z9|AN18B_HUMAN			386.4	0.7	1
KSITIIGGGF	20.05	991.57	10	1	496.793	55.4	695000	1070000	O95831|AIFM1_HUMAN			493.9	0.9	1
KSKESESFVF	21.93	1186.59	10	0.7	396.536	37.05	13100000	10200000	A2VDJ0|T131L_HUMAN			226.2	0.5	1
KSKGNYDEGF	33.12	1143.52	10	1.9	572.768	24.2	3830000	5430000	Q9UHB6|LIMA1_HUMAN:Q9BT23|LIMD2_HUMAN			2390.9	2.5	0
KSKGSQTEEW	33.57	1178.56	10	-0.6	590.285	18.89		47000000	Q14202|ZMYM3_HUMAN			32.6	0.1	1
KSKNLVGVTM(+15.99)	17.65	1091.6	10	-2.3	546.807	22.82		144000	Q6PIJ6|FBX38_HUMAN	Oxidation (M)	M10:Oxidation (M):1000.00	1539.4	1.8	1
KSKPVNKDRY	27.74	1233.68	10	0.3	412.235	13.68	87400	252000	P62316|SMD2_HUMAN			152	0.4	1
KSKRNLQDNF	20.06	1248.66	10	-0.1	625.336	20.09	22500000	28100000	P42224|STAT1_HUMAN			568.2	0.9	1
KSKTAKLQDF	17.11	1164.65	10	-1.4	389.224	19.79	977000	665000	P34897|GLYM_HUMAN			408.1	0.8	1
KSKVDIPAHW	39.54	1179.64	10	-1.2	394.22	33.08		26500000	Q460N5|PAR14_HUMAN			14	0.03	1
KSLALKEKHF	40.32	1199.7	10	-0.2	400.908	20.88	4200000	4550000	Q92673|SORL_HUMAN			34.9	0.1	1
KSLDHQAVNF	12.78	1157.58	10	0.6	386.868	30.92		702000	O75182|SIN3B_HUMAN			422	0.8	1
KSLDHQGINF	51.62	1157.58	10	-1.3	579.798	35.5	55700000	64700000	Q96ST3|SIN3A_HUMAN			1102.7	1.4	1
KSLEDVVRAY	36.63	1178.63	10	-0.8	590.322	47.22	25000000	35000000	Q14152|EIF3A_HUMAN			259	0.6	1
KSLIIVHPSW	14.03	1178.68	10	0.9	590.348	50		1070000	Q12982|BNIP2_HUMAN:Q86WG3|ATCAY_HUMAN			5.7	0.01	1
KSLPAEINRM	25.74	1157.62	10	-1.3	386.881	32.05	346000	664000	Q9H9A6|LRC40_HUMAN			75	0.25	1
KSLPAEINRM(+15.99)	39.28	1173.62	10	-1.5	392.213	25.27	19300000	23000000	Q9H9A6|LRC40_HUMAN	Oxidation (M)	M10:Oxidation (M):1000.00	316.2	0.6	1
KSLSAERERW	15.24	1260.66	10	0	421.226	23.13		1200000	Q14204|DYHC1_HUMAN			9.5	0.015	1
KSNEDLHKLW	18.55	1268.65	10	0.3	423.891	33.45		2240000	Q9HD33|RM47_HUMAN			13.6	0.03	1
KSNQTDAIKW	14.92	1189.61	10	-2	595.811	31		3520000	Q9UGJ1|GCP4_HUMAN			28.3	0.08	1
KSPISFFQCV	12.38	1154.58	10	-1.2	578.296	36.46		158000	Q13061|TRDN_HUMAN			9568.3	8.5	0
KSR(+.98)GYVKEQF	11.96	1241.64	10	-0.4	414.887	22.78	747000	485000	P46783|RS10_HUMAN	Citrullination	R3:Citrullination:1000.00	66.3	0.2	1
KSRGIGTVTF	30.28	1064.6	10	-1.4	355.873	35.37	87400000	98100000	P52272|HNRPM_HUMAN			72.4	0.25	1
KSRGSGEQDW	28.74	1148.52	10	1.4	575.269	19.04		31300000	Q7Z5L9|I2BP2_HUMAN			18.9	0.05	1
KSRGYVKEQF	47.4	1240.66	10	-0.8	621.335	20.99	397000000	540000000	P46783|RS10_HUMAN			133.1	0.4	1
KSRPELLEYY	20.37	1296.67	10	0.2	433.231	45.15	1910000	1300000	Q14258|TRI25_HUMAN			99.6	0.3	1
KSRRVDFETF	18.43	1283.66	10	-0.3	428.895	33.2	1080000	459000	P14649|MYL6B_HUMAN			30.7	0.09	1
KSSGSALTVW	11.99	1034.54	10	0.2	518.277	45.6		511000	Q13630|FCL_HUMAN			17.9	0.04	1
KSSIAGSSTW	43.29	1022.5	10	-0.7	512.259	32.2		35400000	Q99808|S29A1_HUMAN			14.7	0.03	1
KSSIHDARSW	35.85	1185.59	10	0	396.204	20.86		7470000	Q8N2I9|STK40_HUMAN			13.4	0.025	1
KSSQVQRRFF	13.52	1281.69	10	-0.5	428.238	25.42	36500000	18300000	P13010|XRCC5_HUMAN			104.8	0.3	1
KSSSVSPSSW	25.49	1050.5	10	1.1	526.257	32.52		4700000	Q96JM3|CHAP1_HUMAN			15.3	0.03	1
KSSTPNHKKW	10.69	1211.64	10	-0.3	404.887	14.87		187000	P11388|TOP2A_HUMAN			10.5	0.02	1
KSTPYTAVRW	22.3	1207.63	10	1	604.825	37.99		4850000	O15258|RER1_HUMAN			13.2	0.025	1
KSVDRSLLFL	17.66	1176.69	10	0.6	589.351	54.74		2330000	Q9H974|QTRT2_HUMAN			814.7	1.2	1
KSVENLGVSY	33.24	1094.56	10	-0.8	548.287	41.88	27600000	33600000	P49643|PRI2_HUMAN			395.5	0.7	1
KSVKIKTKLF	40.27	1190.78	10	-0.5	397.932	25.65	4030000	5030000	Q8NI27|THOC2_HUMAN			50.5	0.15	1
KSYGNEKRFF	36.74	1274.64	10	2.4	425.889	27.18	1380000	3470000	Q06330|SUH_HUMAN:Q9UBG7|RBPJL_HUMAN			68.8	0.2	1
KTAEEIKQIW	22.25	1244.68	10	-1.5	623.345	40.01		4550000	Q5TC12|ATPF1_HUMAN			11.5	0.02	1
KTAEEVAALI	17.86	1043.59	10	1.7	522.801	51.55	7940000	3650000	Q6P2Q9|PRP8_HUMAN			1292.4	1.6	1
KTAILIQRKY	25.86	1232.76	10	-1.1	411.927	24.33		832000	Q8IZT6|ASPM_HUMAN			176.2	0.5	1
KTAIREAQTF	46.2	1163.63	10	-0.9	582.822	26.23	31100000	24800000	Q9UIG0|BAZ1B_HUMAN			100.1	0.3	1
KTAVIDHHNY	67.32	1196.59	10	-0.7	599.304	19.57	29700000	39000000	P39656|OST48_HUMAN			252.2	0.6	1
KTEADAEKTF	51.79	1138.55	10	0.8	570.283	21.47	9130000	10400000	P19338|NUCL_HUMAN			446.3	0.8	1
KTEASETRKW	21.1	1234.63	10	-0.1	412.551	17.94		141000	Q1ED39|KNOP1_HUMAN			20.1	0.05	1
KTFKDVGNLL	30.25	1133.64	10	-0.2	567.829	45.76	12900000	18500000	Q9NTJ3|SMC4_HUMAN			135.7	0.4	1
KTFRLKTRSW	15.02	1321.76	10	-1.3	441.594	24.38		7300000	P30305|MPIP2_HUMAN			4	0.01	1
KTGCVDTKEA	11.68	1050.5	10	0.1	351.175	22.18		973000	A8TX70|CO6A5_HUMAN			15419.2	15	0
KTIEGIYEKF	31.14	1226.65	10	-0.4	614.334	43.61	10100000	13400000	Q96RT8|GCP5_HUMAN			174.7	0.4	1
KTIPYSDKLF	17.93	1210.66	10	1.2	606.338	47.14	3090000	7280000	Q16891|MIC60_HUMAN			54.5	0.175	1
KTISGHKLGI	10.76	1052.63	10	-0.5	351.885	19.91		179000	P61964|WDR5_HUMAN			1747.9	1.9	1
KTISNGFGFK	14.4	1097.59	10	-0.8	549.8	34.2	794000	1020000	P04049|RAF1_HUMAN			831.6	1.2	1
KTKADGSFRL	37.47	1121.62	10	0.3	374.88	22.64	3410000	3970000	Q5JPE7|NOMO2_HUMAN:Q15155|NOMO1_HUMAN:P69849|NOMO3_HUMAN			980.6	1.3	1
KTKDGVREVF	44.18	1177.65	10	0.3	589.83	23.66	228000000	274000000	P61586|RHOA_HUMAN			737.5	1.1	1
KTKEGVREVF	40.18	1191.66	10	-1.4	398.227	23.07	71100000	89300000	P08134|RHOC_HUMAN:P62745|RHOB_HUMAN			657.8	1	1
KTKEKLEVTW	28.54	1260.71	10	-0.4	421.243	30.86		8520000	Q15031|SYLM_HUMAN			12.8	0.025	1
KTKEQILEEF	20.08	1263.67	10	-0.4	632.842	44.11	12400000	20600000	O60506|HNRPQ_HUMAN			887.5	1.2	1
KTKLFSLEHF	20.12	1248.69	10	0.3	417.236	43.97	1010000	1960000	Q13568|IRF5_HUMAN			409.2	0.8	1
KTKNANILGF	14.52	1104.63	10	0.9	553.322	40.46	4490000	1290000	Q96DM3|RMC1_HUMAN			384.8	0.7	1
KTKNAQQVHF	54.18	1199.64	10	0	400.888	17.91	39700000	50800000	Q66K89|E4F1_HUMAN			237.2	0.5	1
KTKPQPIPNF	21.58	1168.66	10	1.1	390.561	33.56	1310000	839000	Q14674|ESPL1_HUMAN			1315.5	1.6	1
KTKRVLPPNW	30.91	1237.73	10	-0.7	413.584	27.96		88900000	P62277|RS13_HUMAN			19.1	0.05	1
KTKSENGLEF	41.36	1151.58	10	-0.9	576.798	27.9	30900000	37500000	P21796|VDAC1_HUMAN			622	1	1
KTLAEINQKW	41.16	1229.68	10	2.5	615.847	37.43		26800000	Q99728|BARD1_HUMAN			5.7	0.01	1
KTLDQAIM(+15.99)KF	55.9	1209.64	10	1.1	605.829	39.67	112000000	147000000	Q92878|RAD50_HUMAN	Oxidation (M)	M8:Oxidation (M):1000.00	75.1	0.25	1
KTLDQAIMKF	38.03	1193.65	10	-0.8	597.831	49.23	8270000	22500000	Q92878|RAD50_HUMAN			49.6	0.15	1
KTLDSQTRTF	37.4	1195.62	10	-0.5	399.547	25.7	5110000	6060000	P46379|BAG6_HUMAN			111	0.3	1
KTLEDALHC(+119.00)F	26.75	1294.57	10	0.6	432.53	51.31	3190000	5910000	Q9UMW8|UBP18_HUMAN:Q3LFD5|UBP41_HUMAN	Cysteinylation	C9:Cysteinylation:1000.00	60	0.175	1
KTLETHIKIF	34.11	1228.72	10	-0.3	410.58	40.56	12400000	19900000	Q9H2P0|ADNP_HUMAN			65.8	0.2	1
KTLGDFAAEY	37.04	1113.53	10	-0.1	557.774	53.05	6280000	9660000	P09874|PARP1_HUMAN			214.5	0.5	1
KTLHDTRTHF	39.13	1254.65	10	-0.3	419.223	17.83	3820000	4710000	Q8IZT6|ASPM_HUMAN			100.9	0.3	1
KTLPADVQNY	50.25	1147.59	10	-0.9	574.8	36.36	49800000	60300000	Q99590|SCAFB_HUMAN			74.8	0.25	1
KTLPFSRSYY	14	1260.65	10	0.9	421.224	41.43		243000	P14151|LYAM1_HUMAN			45.2	0.15	1
KTLPLTGSTF	44.56	1063.59	10	0.6	532.803	49.54	8850000	7260000	P55265|DSRAD_HUMAN			47	0.15	1
KTLSTFKESW	41.46	1225.63	10	-0.7	613.824	38.99		4300000	Q8NCS4|TM35B_HUMAN			8.8	0.01	1
KTLTPIIQEY	40.7	1204.67	10	0.2	603.342	50.43	9900000	14000000	Q53EL6|PDCD4_HUMAN			101.1	0.3	1
KTLVDNIQRY	23.56	1248.68	10	-0.4	417.235	38.34		1530000	Q8TCU6|PREX1_HUMAN			136.7	0.4	1
KTLVIIEKTY	37.14	1206.72	10	0.4	604.369	39.94	1830000	3590000	Q86TB9|PATL1_HUMAN			40.2	0.125	1
KTNGITPRRW	18.79	1227.68	10	1.4	410.236	21.42		3000000	P06737|PYGL_HUMAN:P11216|PYGB_HUMAN:P11217|PYGM_HUMAN			17.3	0.04	1
KTNIQKEATW	42.22	1217.64	10	-0.5	609.827	26.52		7330000	P52292|IMA1_HUMAN			17.7	0.04	1
KTNPDDRRII	17.14	1226.67	10	-1.2	409.898	21.57	2310000	1790000	P04818|TYSY_HUMAN			2710.8	3	0
KTNSSEGKVF	45.63	1095.56	10	0.8	548.786	19.07	2570000	3180000	Q9NWS0|PIHD1_HUMAN			233	0.5	1
KTPEEIRKTF	45.93	1247.69	10	-0.6	416.903	25.47	23500000	28700000	P63208|SKP1_HUMAN			1228.8	1.5	1
KTPEKEPPLW	15.17	1223.65	10	0	408.892	35.64		2280000	O14715|RGPD8_HUMAN:Q99666|RGPD5_HUMAN:P0DJD0|RGPD1_HUMAN:P0DJD1|RGPD2_HUMAN:A6NKT7|RGPD3_HUMAN:Q7Z3J3|RGPD4_HUMAN			85.5	0.25	1
KTPWR(+.98)AASAM	11.69	1118.55	10	-3.2	560.283	28.67		854000	P30793|GCH1_HUMAN	Citrullination	R5:Citrullination:1000.00	2173.4	2.5	0
KTQLEKHRIW	17.05	1337.76	10	0.9	446.927	22.82		439000	Q96KM6|Z512B_HUMAN			15.6	0.04	1
KTQTPNRKEW	37.89	1286.67	10	-1	429.898	17.88		13500000	P09874|PARP1_HUMAN			22.3	0.06	1
KTRDDWLVSW	17.09	1304.65	10	0	435.891	60.37		17400000	P78527|PRKDC_HUMAN			16.2	0.04	1
KTRDELERSF	30.39	1279.65	10	-2.5	427.557	26.3	2540000	1400000	Q12999|TSN31_HUMAN			122	0.4	1
KTREQVTEAF	33.17	1207.62	10	0.7	604.817	27.78	22700000	27000000	P27987|IP3KB_HUMAN			603.2	1	1
KTRGIFETKF	33.61	1225.68	10	-0.4	409.568	34.56	23600000	35500000	P19367|HXK1_HUMAN:P52789|HXK2_HUMAN			57.1	0.175	1
KTRHTGINLF	27.95	1185.66	10	-0.5	396.228	29.95	9540000	10800000	O75346|ZN253_HUMAN			88	0.25	1
KTRHVNILLF	13.66	1239.75	10	0.3	414.256	44.23	1950000	8660000	P04049|RAF1_HUMAN:P10398|ARAF_HUMAN:P15056|BRAF_HUMAN			60.9	0.175	1
KTRRPDNTAF	16.69	1204.63	10	0.5	402.551	18.2	35900000	46800000	Q9NV96|CC50A_HUMAN			131.5	0.4	1
KTSEAKIKHF	42.19	1187.67	10	1	396.896	16.24	4210000	4670000	Q02880|TOP2B_HUMAN			155.5	0.4	1
KTSELLVRKW	39.53	1258.74	10	-0.4	420.587	32.63		7090000	Q9BVM2|DPCD_HUMAN			11.7	0.02	1
KTVAGGAWTY	37.93	1052.53	10	-0.7	527.271	40.45	1190000	39700000	P61513|RL37A_HUMAN			122	0.4	1
KTVEPTGKRF	47.75	1161.65	10	0.2	388.224	19.2	55100000	68800000	P10155|RO60_HUMAN			91.3	0.25	1
KTVIDSQTHY	34.74	1190.59	10	-1.3	596.303	26.92	2320000	2950000	Q9Y3Q3|TMED3_HUMAN			382.7	0.7	1
KTVIEPLKKF	31.33	1201.74	10	0.8	401.589	31.43		3520000	Q9NQY0|BIN3_HUMAN			142.6	0.4	1
KTVTAM(+15.99)DVVY	38.32	1141.57	10	-0.8	571.791	36.7	66600000	64600000	P62805|H4_HUMAN	Oxidation (M)	M6:Oxidation (M):1000.00	176	0.4	1
KTVTAMDVVY	23.88	1125.57	10	-0.1	563.794	46.86	4650000	11700000	P62805|H4_HUMAN			144.7	0.4	1
KTYGEIFEKF	43.26	1260.64	10	-0.4	631.327	52.48	16500000	37800000	O95298|NDUC2_HUMAN			51.1	0.15	1
KTYQDIQNTI	17.47	1222.62	10	0.6	612.317	41.11	1930000	5210000	P24928|RPB1_HUMAN			578.5	0.9	1
KTYQEVAQKF	40.14	1240.65	10	-0.2	621.33	32.59	10400000	12800000	Q9NZK5|ADA2_HUMAN			94.8	0.3	1
KVAKEAANRW	27.46	1171.65	10	-1	391.556	18.56		2860000	Q9BWT6|MND1_HUMAN			28.9	0.08	1
KVAKLDTSQW	14.76	1174.63	10	-0.2	588.324	34.31		1630000	O60832|DKC1_HUMAN			40.7	0.125	1
KVFESWM(+15.99)HHW	39.62	1401.63	10	-0.7	468.217	40.27	781000	21700000	P04233|HG2A_HUMAN	Oxidation (M)	M7:Oxidation (M):1000.00	22.8	0.06	1
KVFESWMHHW	32.64	1385.63	10	-0.4	462.885	48.34		4160000	P04233|HG2A_HUMAN			7.4	0.01	1
KVFKEKHHSW	30.95	1324.7	10	-1.5	442.575	16.64		1390000	Q5TBB1|RNH2B_HUMAN			11.7	0.02	1
KVFKPISSTW	24	1191.67	10	0.2	596.84	41.09		1730000	Q9NR09|BIRC6_HUMAN			12.2	0.025	1
KVHPVIPAM(+15.99)W	13.42	1192.64	10	0.1	398.555	43.91		296000	Q96JI7|SPTCS_HUMAN	Oxidation (M)	M9:Oxidation (M):1000.00	22.6	0.06	1
KVKEEIGSSW	19.02	1161.6	10	-1.1	581.808	30.87		278000	O95936|EOMES_HUMAN			176.1	0.4	1
KVKQVDSIVW	15.77	1200.69	10	0.7	401.236	41.57		5310000	Q9NQ25|SLAF7_HUMAN			237.1	0.5	1
KVLEEHGEWW	22.4	1311.62	10	-0.9	656.819	48.57		5350000	P07948|LYN_HUMAN			63.4	0.2	1
KVRAESFDTW	10.25	1237.61	10	0.5	619.812	39.52		2590000	P41229|KDM5C_HUMAN			21.5	0.05	1
KVREFNFEKW	20.29	1381.71	10	0.9	461.579	43.63		26300000	P78347|GTF2I_HUMAN			27.3	0.08	1
KVRPAELEQF	16.32	1215.66	10	-0.7	406.227	36.85	4770000	7290000	O43491|E41L2_HUMAN			570.1	0.9	1
KVRSLTLDSW	15.16	1203.66	10	-0.7	602.837	46.4		2180000	Q96P50|ACAP3_HUMAN:Q15027|ACAP1_HUMAN			64.7	0.2	1
KVRSLTLDTW	16.67	1217.68	10	0	406.899	45.89		11400000	Q15057|ACAP2_HUMAN			63.2	0.2	1
L(+42.01)GPQHADNIY	14.16	1168.55	10	0	585.283	40.73	2290000	2080000	Q13291|SLAF1_HUMAN	Acetylation (N-term)	L1:Acetylation (N-term):1000.00	14085.4	13	0
LAADLSLHSF	30.13	1072.56	10	0.5	537.285	58.93	3220000	4170000	Q8TEK3|DOT1L_HUMAN			1197.5	1.5	1
LALAWVSTHT	10.67	1097.59	10	-2.7	549.799	55.76		1680000	Q9BVT8|TMUB1_HUMAN			6079.5	5.5	0
LALPPGAEHW	31.11	1089.56	10	-0.5	545.787	56.68	3120000	2220000	P42768|WASP_HUMAN			21.6	0.05	1
LALSPVPSHW	31.78	1105.59	10	0.8	553.804	59.92		1370000	P40259|CD79B_HUMAN			21.8	0.06	1
LANITMGLPL	11.28	1041.59	10	1.5	348.204	21.83	4230000	1420000	Q9Y4E6|WDR7_HUMAN			5661.6	5	0
LGIPKDPRQW	21.9	1208.67	10	-0.7	403.896	49.2	1090000	33400000	P14921|ETS1_HUMAN			206	0.5	1
LISVGEEESF	10.84	1108.53	10	-0.6	555.271	64.06		663000	Q9H583|HEAT1_HUMAN			994.6	1.3	1
LLAVAGATSL	16.84	914.544	10	1.4	458.28	38.55	658000	566000	Q06643|TNFC_HUMAN			7826.3	7	0
LSAHGIVVAW	12.74	1051.58	10	1.5	526.799	60.86		718000	Q9Y4W2|LAS1L_HUMAN			71.4	0.25	1
LSALIDGKNF	20.42	1076.59	10	0.9	539.301	53.15	750000	888000	Q9Y277|VDAC3_HUMAN			1519.6	1.7	1
LSANQSRIDA	10.36	1073.55	10	2.9	537.782	37.6		316000	Q13813|SPTN1_HUMAN			15935.1	15	0
LSENNIQTIF	13.56	1177.6	10	-1.8	589.805	47.61	2270000	1070000	P05556|ITB1_HUMAN			658.3	1	1
LSKQETGTEF	52.27	1138.55	10	1.4	570.283	29.7	37200000	46600000	Q15051|IQCB1_HUMAN			2815.3	3	0
LSKTETNVYF	10.27	1200.6	10	1.4	601.309	44.01		1070000	Q9NQ55|SSF1_HUMAN			738.3	1.1	1
LSLDELHRKY	31.43	1272.68	10	-0.7	425.235	38.31	5670000	8210000	P05023|AT1A1_HUMAN			495.6	0.9	1
LSM(+15.99)PASLGRM(+15.99)	19.52	1093.53	10	-0.7	547.77	31.21	3920000	3210000	P43243|MATR3_HUMAN	Oxidation (M)	M3:Oxidation (M):1000.00;M10:Oxidation (M):1000.00	2837.1	3	0
LSNAKDVAHW	14.98	1139.57	10	-0.8	380.864	31.97		3260000	O75643|U520_HUMAN			45.6	0.15	1
LSQNGSAPTF	24.05	1020.49	10	0.4	511.251	40.48	8170000	10500000	Q92542|NICA_HUMAN			2875.3	3	0
LSRPDGSASF	43.7	1035.5	10	-1.8	518.756	35.96	16900000	21000000	Q9NQT4|EXOS5_HUMAN			244.9	0.6	1
LSRPTTETQF	32.37	1178.59	10	0	590.304	35.47	7970000	10400000	Q86XZ4|SPAS2_HUMAN			88	0.25	1
LSSPDYQIRW	23.35	1263.62	10	1.2	632.82	59.6		1520000	Q14999|CUL7_HUMAN			27.7	0.08	1
LSSQGTVRFF	16.82	1140.59	10	0.4	571.304	53.24		3700000	Q9H000|MKRN2_HUMAN			541.4	0.9	1
LSTHDPNITW	18.32	1182.57	10	-0.2	592.291	49.81		4560000	Q86TG7|PEG10_HUMAN			65.7	0.2	1
LTDADKKRLW	26.33	1244.69	10	-1.8	415.902	29.24		1200000	O00750|P3C2B_HUMAN			97	0.3	1
LTIKSIGHQW	37.04	1181.66	10	1.5	591.836	44.74	489000	19900000	P00403|COX2_HUMAN			11.6	0.02	1
LTIPDGGVHI	11.46	1020.56	10	-1.2	511.287	57.5		660000	Q9NTZ6|RBM12_HUMAN:Q8IXT5|RB12B_HUMAN			4253.7	4	0
LTLNEDLRSW	18.26	1245.64	10	1.6	623.826	63.28		1410000	P13747|HLAE_HUMAN			14.8	0.03	1
LTM(+15.99)PDTPRLF	21.36	1205.61	10	0.1	603.813	56.44	4990000	9950000	Q9NQ25|SLAF7_HUMAN	Oxidation (M)	M3:Oxidation (M):1000.00	165.6	0.4	1
LTMPDTPRLF	21.27	1189.62	10	0.7	595.816	67.13		905000	Q9NQ25|SLAF7_HUMAN			110.3	0.3	1
LTNESTNHSW	19.58	1187.52	10	-1	594.767	29.09		1200000	Q8WTW3|COG1_HUMAN			20.4	0.05	1
LTRISDPEKW	23.18	1243.66	10	2.3	415.56	39.65		17900000	Q14562|DHX8_HUMAN			30	0.09	1
LVTQHPEVIY	21	1197.64	10	0.1	599.827	35.21	3110000	3250000	Q9NZK5|ADA2_HUMAN			4427.5	4	0
M(+15.99)AFQNDVYEW	16.99	1317.53	10	0.4	659.774	68.98		9490000	O00767|ACOD_HUMAN	Oxidation (M)	M1:Oxidation (M):1000.00	60.6	0.175	1
M(+15.99)TAGVDGHSW	33.86	1075.44	10	0.8	538.727	35.02		4120000	O75694|NU155_HUMAN	Oxidation (M)	M1:Oxidation (M):1000.00	31.4	0.09	1
M(+15.99)TFKDVEVTF	13.85	1231.58	10	0.3	616.797	58.89		421000	P59923|ZN445_HUMAN	Oxidation (M)	M1:Oxidation (M):1000.00	2417.9	2.5	0
MTAGVDGHSW	21.5	1059.44	10	0.8	530.73	41.02		822000	O75694|NU155_HUMAN			6.1	0.01	1
NSIKELNERW	36.76	1287.66	10	-0.8	430.226	38.96	453000	26800000	Q13813|SPTN1_HUMAN			108.3	0.3	1
NSVAASLM(+15.99)SW	21.51	1080.49	10	0.4	541.253	63.36		2720000	P09912|IFI6_HUMAN	Oxidation (M)	M8:Oxidation (M):1000.00	27.3	0.08	1
NTLKEVNM(+15.99)RW	21.2	1305.65	10	-0.1	436.224	34.08		3010000	Q8NF91|SYNE1_HUMAN	Oxidation (M)	M8:Oxidation (M):1000.00	30.8	0.09	1
PGYIDMVSTF	17.42	1128.52	10	-3.1	565.264	37.81	2400000	2550000	P35453|HXD13_HUMAN			17164.5	17	0
QAINPKLLQL	21.09	1136.69	10	-0.3	569.353	58.52	3140000	5240000	P17844|DDX5_HUMAN			6255.5	5.5	0
QSFQAGHHYW	36.08	1259.55	10	0	630.781	35.6		9370000	Q6PJ69|TRI65_HUMAN			18.8	0.05	1
QSKGPRWASW	25.49	1201.6	10	-1.1	601.806	38.96	521000	3330000	Q8WU79|SMAP2_HUMAN			78.8	0.25	1
QSLKDSEQKW	12.14	1247.61	10	0.4	416.879	28.36		2610000	Q6ZRQ5|MMS22_HUMAN			50.3	0.15	1
QSLPDFGISY	12.63	1125.53	10	0.5	563.775	73.84	3690000	7020000	Q86UX7|URP2_HUMAN			998.3	1.3	1
QSSTAKSATW	28.82	1065.51	10	-0.8	533.761	22.77		1750000	Q9H3D4|P63_HUMAN:O15350|P73_HUMAN			69.3	0.2	1
QSVALLEQKW	13.83	1200.65	10	-0.2	601.332	58.52		1090000	Q9UPN3|MACF1_HUMAN			41.9	0.125	1
QSVKSMYLKY	12.21	1245.64	10	2.8	416.223	26.14		343000	Q9NZJ4|SACS_HUMAN			323.9	0.7	1
QTKNSGTEHW	13.31	1186.54	10	-1.6	396.519	18.71		769000	Q96P70|IPO9_HUMAN			277.9	0.6	1
QTLSLEADKW	17.21	1189.6	10	0.1	595.806	55.58		1400000	P52333|JAK3_HUMAN			24.8	0.07	1
QTNHIIIPSY	12.32	1184.62	10	3.4	593.319	50.95		3900000	Q92922|SMRC1_HUMAN			5058	4.5	0
QTVKDSRTVY	25.64	1195.62	10	0	598.817	21.36	5710000	4230000	P78371|TCPB_HUMAN			3575.1	3.5	0
QTVSDIERGW	26.79	1189.57	10	-1.1	595.793	49.91		2560000	Q15036|SNX17_HUMAN			77.3	0.25	1
RAAEPVRVVW	18.97	1181.67	10	-0.1	394.896	40.37		1200000	Q2T9J0|TYSD1_HUMAN			16.5	0.04	1
RAGPLSGKKF	46.45	1059.62	10	-0.2	354.214	21.11	6220000	6170000	P17844|DDX5_HUMAN			323.9	0.7	1
RAIDSIHQLW	32.66	1237.66	10	-0.2	413.559	51.65	436000	24500000	Q8TEK3|DOT1L_HUMAN			13.9	0.03	1
RAKTDSAEKW	38.02	1190.6	10	1.1	397.876	17.24		3950000	Q15058|KIF14_HUMAN			32.2	0.1	1
RALELEARRW	30.6	1298.72	10	-0.9	433.914	34.84	4690000	39000000	Q03169|TNAP2_HUMAN			8.8	0.01	1
RALLEKNRSY	33.94	1248.69	10	-0.7	417.238	20.37	3630000	4860000	O60231|DHX16_HUMAN			584.1	0.9	1
RAYPHNLM(+15.99)TF	41.73	1264.6	10	-1.3	422.541	35.05	15400000	17900000	Q15629|TRAM1_HUMAN	Oxidation (M)	M8:Oxidation (M):1000.00	64.6	0.2	1
RAYPHNLMTF	11.65	1248.61	10	-2	417.209	44.39		773000	Q15629|TRAM1_HUMAN			34.2	0.1	1
RGFQSQVKKW	40.63	1262.69	10	-1	421.903	24.71		4830000	O43159|RRP8_HUMAN			34.3	0.1	1
RGGDFKGRKW	26.28	1205.64	10	-0.5	402.888	18.66		8280000	Q96SK2|TM209_HUMAN			714.9	1.1	1
RGYPDSESTW	15.7	1196.51	10	1.2	599.263	39.09		4040000	O43463|SUV91_HUMAN			41	0.125	1
RIKSLEKDSW	35.87	1260.68	10	-1.3	421.234	26.78		1590000	Q9P2M7|CING_HUMAN			170.6	0.4	1
RLLPYALHKW	15.66	1295.75	10	-0.7	432.924	45.63		535000	Q9UL63|MKLN1_HUMAN			36.3	0.125	1
RQLEQELHKW	32.08	1365.72	10	1.1	456.246	32.2		1790000	Q96EZ8|MCRS1_HUMAN			166.6	0.4	1
RQNPHHVHEW	40	1338.63	10	-0.4	447.218	17.15		6070000	Q9HCS7|SYF1_HUMAN			1166.5	1.5	1
RSAEEIRKFW	13.46	1320.69	10	0.3	441.239	39.22		537000	Q5SXM2|SNPC4_HUMAN			19.6	0.05	1
RSASSASSLF	32.88	1011.5	10	-0.7	506.756	36.67	4540000	5270000	Q14671|PUM1_HUMAN			177.7	0.5	1
RSFKETTNRW	40.76	1323.67	10	-0.3	442.23	23.3	649000	16300000	Q92613|JADE3_HUMAN			7	0.01	1
RSHEPYLKSW	37.1	1301.65	10	-0.1	434.891	29.18		3170000	Q05469|LIPS_HUMAN			10	0.015	1
RSIAIGKKLF	13.06	1131.71	10	-1.8	378.244	36.11		824000	Q92624|APBP2_HUMAN			34.9	0.1	1
RSIKAQLQNF	19.5	1203.67	10	1.2	602.844	36.29	790000	2080000	Q15057|ACAP2_HUMAN			102.4	0.3	1
RSIQADGLVW	14.73	1143.6	10	-0.1	572.809	56.22	633000	11000000	P24534|EF1B_HUMAN			17.2	0.04	1
RSIVEKSELW	18.81	1245.67	10	1.8	416.232	43.01		1000000	Q14643|ITPR1_HUMAN			15.8	0.04	1
RSKDVAKILW	11.15	1214.71	10	-0.2	405.912	36.36		2480000	Q7L8L6|FAKD5_HUMAN			17.4	0.04	1
RSKEGLTERF	39.91	1221.65	10	0.7	408.223	22.56	1120000	585000	Q15046|SYK_HUMAN			534.5	0.9	1
RSKPDKDLLM(+15.99)	26.74	1217.64	10	0.9	406.889	20.33	3830000	4650000	P42695|CNDD3_HUMAN	Oxidation (M)	M10:Oxidation (M):1000.00	1357.4	1.6	1
RSKPHIHPC(+119.00)W	10.26	1378.64	10	1.7	460.554	20.77		587000	Q96DX4|RSPRY_HUMAN	Cysteinylation	C9:Cysteinylation:1000.00	8.9	0.015	1
RSKPPATVHY	22.05	1154.62	10	-1.5	385.88	18.97	236000	743000	Q9NQC8|IFT46_HUMAN			305.1	0.6	1
RSLHARIEQW	33.7	1294.69	10	-0.1	432.57	29.68		4510000	Q8WXH5|SOCS4_HUMAN:O75159|SOCS5_HUMAN			8.6	0.01	1
RSLINSNVGF	37.21	1105.59	10	0.6	553.802	51.7	4480000	2040000	Q9NR30|DDX21_HUMAN			128.8	0.4	1
RSLKDALFKW	29.06	1262.71	10	-0.1	421.912	53.11		13600000	P40818|UBP8_HUMAN			6.7	0.01	1
RSLNQTGVQW	14.86	1187.6	10	0.7	594.81	43.16		3530000	Q5H8A4|PIGG_HUMAN			9.9	0.015	1
RSLPDIPAHL	21.33	1117.62	10	-1.6	559.819	48.15	5720000	7560000	O60244|MED14_HUMAN			176.7	0.5	1
RSLPEPLM(+15.99)TY	38.55	1221.61	10	0.9	611.811	47.38	11200000	12100000	A1A4S6|RHG10_HUMAN	Oxidation (M)	M8:Oxidation (M):1000.00	56.3	0.175	1
RSLPEPLMTY	12.78	1205.61	10	0.4	603.813	55.62	1040000	2750000	A1A4S6|RHG10_HUMAN			39.1	0.125	1
RSLPLGARC(+119.00)F	14.7	1237.61	10	-1.3	413.542	35.84	576000	949000	O75380|NDUS6_HUMAN	Cysteinylation	C9:Cysteinylation:1000.00	30.5	0.09	1
RSLSDLFRRY	30.89	1311.7	10	-0.8	438.242	50.1	65000000	135000000	O75410|TACC1_HUMAN			90	0.25	1
RSLSPPHKRW	10.75	1262.7	10	-1.2	421.907	19.9		71200	Q5VV67|PPRC1_HUMAN			8.3	0.01	1
RSLTTLSEQW	11.05	1219.62	10	0.5	610.817	52.28		753000	Q9NU22|MDN1_HUMAN			8.8	0.01	1
RSLVPAAVVW	18.15	1096.64	10	0.6	549.327	63.2		4610000	Q9UDX5|MTFP1_HUMAN			7.4	0.01	1
RSM(+15.99)QLDYTTW	11.93	1315.59	10	-0.9	658.8	50.84		5170000	Q96R06|SPAG5_HUMAN	Oxidation (M)	M3:Oxidation (M):1000.00	7.1	0.01	1
RSM(+15.99)VSTIM(+15.99)KF	34.23	1230.61	10	2.1	411.212	29.18	2890000	1440000	Q9NR09|BIRC6_HUMAN	Oxidation (M)	M3:Oxidation (M):1000.00;M8:Oxidation (M):1000.00	792.4	1.1	1
RSMQLDYTTW	15.5	1299.59	10	0.3	650.803	58.31		1470000	Q96R06|SPAG5_HUMAN			7.5	0.01	1
RSNIHVVNEW	18.61	1252.63	10	-0.2	627.323	35.97		477000	Q9HAN9|NMNA1_HUMAN			19.4	0.05	1
RSQSSELTKW	18.67	1220.62	10	1.9	407.88	28.98		330000	Q9Y450|HBS1L_HUMAN			18.4	0.04	1
RSRDISREEW	23.97	1332.65	10	-1.2	445.224	23.89		62500000	Q9ULV3|CIZ1_HUMAN			27.1	0.08	1
RSRGFGFVTF	12.66	1172.61	10	-0.1	391.877	54.81	7590000	9510000	O43347|MSI1H_HUMAN			52.2	0.175	1
RSRKELLNFY	14.51	1324.73	10	-0.9	442.582	37.36	5890000	12400000	Q9Y3A4|RRP7A_HUMAN			304.8	0.6	1
RSRKLAAVTY	20.25	1163.68	10	0.2	388.9	21.29	27300000	32000000	Q16181|SEPT7_HUMAN			127.2	0.4	1
RSRPEERPTF	20.51	1273.65	10	0.3	425.558	21.39	728000	3330000	P51451|BLK_HUMAN			60	0.175	1
RSSQFARKLW	34.03	1277.7	10	0.3	426.907	32.25		6110000	Q6ZNJ1|NBEL2_HUMAN			11.5	0.02	1
RSSVVTAVKF	18.75	1092.63	10	1.2	547.322	35.75	3230000	3500000	Q86VP6|CAND1_HUMAN			79.5	0.25	1
RSVAQAGVQW	13.88	1100.57	10	1.5	551.294	40.1		2630000	Q6UX73|CP089_HUMAN			10.4	0.015	1
RSVDVTNTTF	32.78	1138.56	10	0.2	570.288	40.8	10100000	9390000	O14579|COPE_HUMAN			96.5	0.3	1
RSVPHLQKVF	40.23	1209.7	10	2.6	404.241	33.26	3100000	3790000	A6NMY6|AXA2L_HUMAN:P07355|ANXA2_HUMAN			50.2	0.15	1
RSYQLEGVNW	15.92	1250.6	10	1.2	626.31	56.21		4370000	Q86WJ1|CHD1L_HUMAN			16.1	0.04	1
RSYSESEKQW	46.34	1298.59	10	-0.7	433.87	25.17	428000	38000000	Q96HQ2|C2AIL_HUMAN			8.3	0.01	1
RTAAGLM(+15.99)HTF	15.7	1119.55	10	0.9	374.191	27.2	390000	993000	P49903|SPS1_HUMAN:Q99611|SPS2_HUMAN	Oxidation (M)	M7:Oxidation (M):1000.00	100.3	0.3	1
RTAGHPLTRW	26.86	1193.64	10	-1.2	398.887	21.94	1840000	65600000	P35236|PTN7_HUMAN			15.5	0.03	1
RTAKALQAHW	42.08	1180.65	10	-1.3	394.556	22.86		12400000	Q96EZ8|MCRS1_HUMAN			8.5	0.01	1
RTAQLAKIKW	35.85	1213.73	10	-0.2	405.584	32.4		3910000	O00258|WRB_HUMAN			12.1	0.025	1
RTFTDHVM(+15.99)LF	12.64	1281.62	10	-2.1	428.212	52.16	6470000	1990000	Q96GQ7|DDX27_HUMAN	Oxidation (M)	M8:Oxidation (M):1000.00	25.4	0.07	1
RTIKIRNISY	19.1	1262.75	10	0.5	421.923	31.65	2300000	755000	Q96CX6|LRC58_HUMAN			207	0.5	1
RTILVDNNTW	41.67	1230.64	10	1.8	616.326	51.33	3550000	31800000	P46977|STT3A_HUMAN			7.3	0.01	1
RTIQTAFRQY	22.8	1282.68	10	2	428.567	33.93	186000	663000	Q5JU85|IQEC2_HUMAN:Q6DN90|IQEC1_HUMAN			182.4	0.5	1
RTKDIEDVFY	12.42	1284.63	10	1	643.325	47.5		6980000	Q07955|SRSF1_HUMAN			1792.4	2	1
RTLESKLVLF	10.75	1204.72	10	-0.6	603.366	53.81		2060000	Q9UI14|PRAF1_HUMAN			77	0.25	1
RTLKIM(+15.99)TRLF	12.06	1293.76	10	-0.8	432.26	39.4		1640000	Q92974|ARHG2_HUMAN	Oxidation (M)	M6:Oxidation (M):1000.00	23.5	0.06	1
RTLPKGTKSW	15.55	1172.67	10	-0.3	391.896	21.61		389000	Q99973|TEP1_HUMAN			7.9	0.01	1
RTM(+15.99)ELLTQNW	18.85	1306.63	10	-0.3	654.324	52.16		5230000	Q8IZT6|ASPM_HUMAN	Oxidation (M)	M3:Oxidation (M):1000.00	8.2	0.01	1
RTM(+15.99)M(+15.99)EDFRKY	26.54	1407.63	10	-0.9	470.216	23.07	4430000	4390000	P55884|EIF3B_HUMAN	Oxidation (M)	M3:Oxidation (M):1000.00;M4:Oxidation (M):1000.00	1473.6	1.7	1
RTM(+15.99)NIKSATW	24.52	1222.61	10	0.3	612.314	26.24		17600000	Q16665|HIF1A_HUMAN	Oxidation (M)	M3:Oxidation (M):1000.00	7.3	0.01	1
RTMM(+15.99)EDFRKY	11.47	1391.63	10	-0.6	464.885	26.93		357000	P55884|EIF3B_HUMAN	Oxidation (M)	M4:Oxidation (M):17.01	257	0.6	1
RTMMEDFRKY	13.09	1375.64	10	1.4	459.554	36.07		250000	P55884|EIF3B_HUMAN			187.8	0.5	1
RTMNIKSATW	22.04	1206.62	10	0.9	604.317	34.76		3470000	Q16665|HIF1A_HUMAN			6.7	0.01	1
RTQM(+15.99)PDPKTF	25.01	1235.6	10	1.2	412.873	23.85	906000	573000	Q9Y5V0|ZN706_HUMAN	Oxidation (M)	M4:Oxidation (M):1000.00	291.7	0.6	1
RTQNKEKLQW	22.55	1329.72	10	0.4	444.246	22.44		1950000	Q9NZ08|ERAP1_HUMAN			21.1	0.05	1
RTRLEQVHEW	16.49	1352.69	10	-0.3	451.906	29.27	2100000	26700000	Q9P2E3|ZNFX1_HUMAN			9.2	0.015	1
RTSDDVAKEF	25.14	1166.56	10	-0.2	584.285	30.72	7480000	7510000	Q8NB66|UN13C_HUMAN			564.1	0.9	1
RTSIETNVRF	40.84	1221.65	10	0	408.223	35.94	5670000	2950000	P09086|PO2F2_HUMAN			129.8	0.4	1
RTTHLHNDLW	17.54	1291.64	10	-1.5	431.554	29.4		374000	Q02809|PLOD1_HUMAN			13.7	0.03	1
RTTLVDNNTW	30.77	1218.6	10	-0.1	610.307	43.82		5680000	Q8TCJ2|STT3B_HUMAN			7.5	0.01	1
RTVSLVHESF	12.01	1173.61	10	1.3	587.815	38.63		2150000	Q9Y5T5|UBP16_HUMAN			84	0.25	1
RTYSDDHVKF	19.65	1266.6	10	-2.6	423.206	26.84	1920000	4660000	O43592|XPOT_HUMAN			66	0.2	1
RTYSLVGQAW	19.15	1179.6	10	-0.4	590.809	55.35		4490000	Q9GZY6|NTAL_HUMAN			10.9	0.02	1
RTYTYEKLLW	40.57	1371.72	10	-0.1	458.247	55.21	970000	27200000	P35222|CTNB1_HUMAN			6.6	0.01	1
RVDPDVAQHW	26.72	1221.59	10	-1.5	611.801	36.82		4490000	Q9NYR9|KBRS2_HUMAN			305	0.6	1
RVFPDKGYSF	34.54	1214.61	10	-1.3	608.311	44.92	12300000	18200000	P31483|TIA1_HUMAN			102.1	0.3	1
RVFPEKGYSF	36.98	1228.62	10	1.3	615.32	42.66	17100000	25200000	Q01085|TIAR_HUMAN			98.5	0.3	1
RVINEEYKIW	45.81	1348.71	10	-0.3	450.578	48.37	4540000	43200000	Q09028|RBBP4_HUMAN:Q16576|RBBP7_HUMAN			28.7	0.08	1
RVKAEPFIKW	32.77	1272.73	10	-0.3	425.252	40.13		39400000	P55010|IF5_HUMAN			50.7	0.15	1
RVKKGFDFQW	19.54	1309.69	10	-0.9	437.571	43.2		10000000	Q92900|RENT1_HUMAN			43.3	0.15	1
RVKPLHYISW	36.96	1297.73	10	-0.8	433.583	40.77	16700000	196000000	O43847|NRDC_HUMAN			17.9	0.04	1
RVKQEKGIFW	31.95	1289.72	10	0.2	430.916	33.35		12700000	Q9NSG2|CA112_HUMAN			534.4	0.9	1
RVKSVNLDQW	34.76	1243.67	10	-1	415.563	39.02	5460000	118000000	Q8WU79|SMAP2_HUMAN:Q8IYB5|SMAP1_HUMAN			88.2	0.25	1
RVRSHLAALW	16.43	1207.69	10	0.7	403.572	36.2		25400000	P35613|BASI_HUMAN			21.2	0.05	1
S(+42.01)SRKVEFGPG	13.61	1104.56	10	-1.8	553.284	22.49		175000	Q86XX4|FRAS1_HUMAN	Acetylation (N-term)	S1:Acetylation (N-term):1000.00	18350.9	19	0
SAAEAVKEKW	12.09	1117.58	10	0.9	373.533	28.36		433000	P15924|DESP_HUMAN			67	0.2	1
SAASPHYQEW	49.75	1174.5	10	0.2	588.26	37.3		10800000	Q6SPF0|SAMD1_HUMAN			49.2	0.15	1
SADDKTVRLW	19.28	1189.61	10	0.6	397.544	42.16		1500000	Q9Y3F4|STRAP_HUMAN			588.3	1	1
SAGFHPSGSV	12.93	944.435	10	0.6	473.225	25.43		2850000	O95834|EMAL2_HUMAN			14881.7	14	0
SAKRNENNFW	17.69	1264.59	10	0.3	422.539	29.73		2320000	Q12796|PNRC1_HUMAN			119.5	0.4	1
SAKSARLNLW	42.95	1144.64	10	0.1	573.325	38.96		49800000	Q7KZF4|SND1_HUMAN			71	0.25	1
SAR(+.98)LLVQGAW	11.95	1100.6	10	-1.6	551.305	52.55		2160000	Q6ZR85|CQ107_HUMAN	Citrullination	R3:Citrullination:1000.00	30.6	0.09	1
SARAAGYDLY	26.4	1085.51	10	0.3	543.764	39.08	5840000	8110000	P33316|DUT_HUMAN			610.2	1	1
SATDAAIRVW	46.23	1088.56	10	-0.2	545.288	51.16	682000	17100000	Q12788|TBL3_HUMAN			89.6	0.25	1
SATSSSQRDW	35.98	1123.49	10	-0.5	562.752	23.51		3440000	Q96T88|UHRF1_HUMAN			133.5	0.4	1
SAYDSKADIW	16.04	1154.52	10	0.4	578.27	48.03		784000	Q9P289|STK26_HUMAN:Q9Y6E0|STK24_HUMAN			254.5	0.6	1
SGSPLLILTF	12.19	1046.6	10	-0.4	524.308	68.75	6740000	5670000	Q9NRZ7|PLCC_HUMAN			3148.3	3	0
SINSAAELTY	19.13	1067.51	10	0.5	534.764	32.93	6420000	3440000	O60449|LY75_HUMAN			6612.9	6	0
SLKGIPTLVY	10.81	1089.64	10	-0.8	364.221	37.11		89400	Q63HN8|RN213_HUMAN			15433.5	15	0
SSAAVKDTLW	21.45	1076.55	10	1.6	539.283	46.19		4290000	Q96RT1|ERBIN_HUMAN			22.3	0.06	1
SSKQAAEEVW	12.6	1133.54	10	-1.3	567.774	33.85		2060000	Q96SK2|TM209_HUMAN			72.5	0.25	1
SSKRAELEKW	17.76	1232.65	10	0.2	411.891	23.62		2210000	Q9UH65|SWP70_HUMAN			35.6	0.1	1
SSLPADVHRY	13.86	1143.57	10	-1	382.196	30.48	93800	111000	Q96KA5|CLP1L_HUMAN			210.3	0.5	1
SSRSVVNM(+15.99)EW	21.43	1209.54	10	0.7	605.78	37.87		612000	P07814|SYEP_HUMAN	Oxidation (M)	M8:Oxidation (M):1000.00	13.6	0.03	1
SSSPEVKGYW	41.69	1138.53	10	0.7	570.272	43.12	4540000	98000000	Q15365|PCBP1_HUMAN:Q15366|PCBP2_HUMAN			40	0.125	1
SSTRGISQLW	12.73	1133.58	10	1.9	567.8	51.84		4340000	Q96HA1|P121A_HUMAN:A8CG34|P121C_HUMAN			24.2	0.06	1
STAKEIIQHF	41.08	1172.62	10	0.3	587.317	41.78	24300000	29500000	Q9UET6|TRM7_HUMAN			1367.6	1.6	1
STALRAAQHW	15.52	1139.58	10	-1	570.798	28.8		1150000	A2RRP1|NBAS_HUMAN			23.3	0.06	1
STLRELGQTW	29.56	1189.61	10	0.9	595.812	52		10500000	Q8NF91|SYNE1_HUMAN			15.1	0.03	1
STM(+15.99)GKPQRLY	36.64	1195.6	10	-0.1	399.541	20.87	4760000	5330000	P62906|RL10A_HUMAN	Oxidation (M)	M3:Oxidation (M):1000.00	757.6	1.1	1
TAAPM(+15.99)DVRQW	27.12	1189.55	10	-0.7	595.784	38.11		5580000	P15927|RFA2_HUMAN	Oxidation (M)	M5:Oxidation (M):1000.00	29	0.09	1
TAAPMDVRQW	13.33	1173.56	10	-6.2	587.784	49.93		221000	P15927|RFA2_HUMAN			33.8	0.1	1
TAAQITQRKW	43.07	1201.66	10	-0.1	601.836	28.21	327000	66400000	P30485|1B47_HUMAN:P30492|1B54_HUMAN:P30484|1B46_HUMAN:Q29940|1B59_HUMAN:P30464|1B15_HUMAN:P30493|1B55_HUMAN:P30495|1B56_HUMAN:P18465|1B57_HUMAN:Q29718|1B82_HUMAN:P01889|1B07_HUMAN:P30480|1B42_HUMAN:Q95365|1B38_HUMAN:P30475|1B39_HUMAN:Q29836|1B67_HUMAN:P30462|1B14_HUMAN:P30479|1B41_HUMAN:P30483|1B45_HUMAN:P30488|1B50_HUMAN:P30487|1B49_HUMAN:P03989|1B27_HUMAN:Q04826|1B40_HUMAN:P30460|1B08_HUMAN:P30…			46.6	0.15	1
TFSSLHVERW	12.55	1260.63	10	1	421.216	41.06		388000	Q9Y673|ALG5_HUMAN			164.5	0.4	1
TLPPGPDPLL	17.6	1018.57	10	0.3	510.292	51.94	10700000	4820000	Q14005|IL16_HUMAN			26899.7	40	0
TSKPPGTTEW	48.99	1102.53	10	-0.2	552.272	32.13	237000	37600000	P49915|GUAA_HUMAN			45.4	0.15	1
TSLGYEVQKF	23.59	1170.59	10	0.1	586.303	49.23	1740000	2990000	O15519|CFLAR_HUMAN			421.5	0.8	1
TSLTLKHAAW	34.86	1126.61	10	0.6	564.314	38.64		386000	Q99567|NUP88_HUMAN			31.1	0.09	1
TSLVSDGETW	10.22	1093.49	10	0	547.754	58.8		896000	O43175|SERA_HUMAN			26.7	0.07	1
TSSKPDPSQW	51.08	1131.52	10	-1.1	566.766	32.53	3940000	180000000	O75410|TACC1_HUMAN			54.6	0.175	1
TSSSSVRVEW	37.68	1136.55	10	0.2	569.28	42.67	2370000	51500000	Q9NZ45|CISD1_HUMAN			77.4	0.25	1
TSYSNYYRTW	30.94	1339.58	10	0.8	670.799	50.58		2640000	P35610|SOAT1_HUMAN			27.5	0.08	1
TTIHQIVRQW	21.08	1280.7	10	0.9	427.907	42.62		4030000	O60568|PLOD3_HUMAN			26.1	0.07	1
TTKKDLKDYF	29.29	1257.66	10	1.5	420.228	35.36	4140000	13500000	Q14103|HNRPD_HUMAN			1166.8	1.5	1
TTKPSSLDQF	15.75	1122.56	10	0.1	562.285	38.47	458000	778000	Q92556|ELMO1_HUMAN			1519.2	1.7	1
TVYTGIDHHW	36.2	1227.57	10	-0.2	614.791	39.63	709000	24900000	Q9NV06|DCA13_HUMAN			111.1	0.3	1
VAAPSWLHRF	32.28	1182.63	10	-1.6	395.217	52.77	194000	6310000	Q00341|VIGLN_HUMAN			175.7	0.4	1
VAKDPIVNVW	26.41	1139.63	10	0.2	570.824	55.72		3520000	Q13347|EIF3I_HUMAN			51	0.15	1
VAKPNIGENW	39.46	1126.58	10	0.2	564.296	43.65		18500000	O60306|AQR_HUMAN			174.6	0.4	1
VARVEPNIKW	29.79	1210.68	10	0.1	404.568	42.19		22200000	Q13823|NOG2_HUMAN			44.6	0.15	1
VAWNEGSRQW	16.9	1231.57	10	0.6	616.794	46.89		3010000	Q3ZAQ7|VMA21_HUMAN			26.7	0.07	1
VSAEGVLHVW	19	1095.57	10	1.1	548.793	61.32		511000	P15260|INGR1_HUMAN			27.4	0.08	1
VSAIKENFQF	36.53	1181.61	10	1	591.812	54.93	13400000	19500000	Q460N5|PAR14_HUMAN			328.7	0.7	1
VSQKISKTRW	23.2	1231.7	10	0.3	411.575	21.28		1650000	Q8NFH3|NUP43_HUMAN			32.6	0.1	1
VSREDGSFSF	13.05	1129.5	10	0	565.759	46.15	780000	1110000	Q5JPE7|NOMO2_HUMAN:Q15155|NOMO1_HUMAN:P69849|NOMO3_HUMAN			691.9	1.1	1
VSRSPKLEVW	22.76	1199.67	10	0.2	400.896	39.83		6440000	Q9H6A9|PCX3_HUMAN			52.7	0.175	1
VSSRVTAVSF	17.82	1051.57	10	-0.4	526.79	34.03	3840000	2240000	O60336|MABP1_HUMAN			224.2	0.5	1
VTFPDIIRNY	18.77	1236.65	10	0.4	619.333	67.99	854000	3960000	P42224|STAT1_HUMAN			321.1	0.7	1
VTKDGRVFAW	25.93	1177.62	10	0.2	589.82	42.95	1070000	44700000	P18754|RCC1_HUMAN			296.5	0.6	1
VTKLGFKIVS	13.79	1090.67	10	0.5	546.345	26.83		685000	O43159|RRP8_HUMAN			15670.9	15	0
VTKTVSNDSF	58.77	1096.54	10	1.4	549.278	27.67	60200000	78900000	P55209|NP1L1_HUMAN			2613.5	3	0
VTNKSQIRTW	43.25	1231.67	10	-0.4	616.841	25.04	7170000	274000000	P27694|RFA1_HUMAN			47.4	0.15	1
VTQGHGAYLM(+15.99)	11.49	1091.51	10	-0.5	546.76	26.85	90100	101000	Q9UKK3|PARP4_HUMAN	Oxidation (M)	M10:Oxidation (M):1000.00	8042.2	7	0
VTRPDSGHLY	23.46	1143.57	10	-0.7	572.79	29.26	37300000	28600000	Q15418|KS6A1_HUMAN			301.6	0.6	1
VTTAPEFRRW	12.22	1261.66	10	1	421.56	40.1		2920000	P22695|QCR2_HUMAN			26.7	0.07	1
VTVPANVQRW	33.12	1168.64	10	0.9	585.325	48	564000	33800000	Q13155|AIMP2_HUMAN			18.9	0.05	1
VVARTVAQLW	16.49	1141.66	10	0.5	571.838	55.84		7350000	Q9NPF4|OSGEP_HUMAN			28.3	0.08	1
VVDPFSKKDW	12.47	1219.62	10	-0.5	407.548	49.14		654000	P61247|RS3A_HUMAN			1016.3	1.4	1
VVLVEPKTAW	16.27	1140.65	10	-0.7	571.334	54.9		252000	P09543|CN37_HUMAN			120.7	0.4	1
YTKIPDPSTW	31	1206.59	10	-0.1	604.303	54.41		6130000	Q9Y617|SERC_HUMAN			56.1	0.175	1
AAAAAAAAAAW	40.98	914.461	11	1.8	458.239	46.71	419000	389000	Q96QS3|ARX_HUMAN			922	1.3	1
AAIDNDLQPSW	10.93	1228.57	11	-0.3	615.293	63.98		415000	Q9UP65|PA24C_HUMAN			1504.1	1.7	1
AAKNLQEAEEW	29.85	1287.61	11	1.5	644.813	41.33		16100000	P08670|VIME_HUMAN:P41219|PERI_HUMAN			1504.2	1.7	1
AALDSRKNYNW	15.4	1336.65	11	-0.3	446.558	35.55		6350000	Q9BYN8|RT26_HUMAN			542.3	0.9	1
AAYRNLGQNLW	34.83	1304.66	11	-0.4	653.338	55.46	2490000	29500000	Q9P258|RCC2_HUMAN			58.1	0.175	1
AFLGAM(+15.99)VVLAF	12.9	1153.62	11	1.2	577.818	49.31	2120000	1320000	Q14703|MBTP1_HUMAN	Oxidation (M)	M6:Oxidation (M):1000.00	3638.4	3.5	0
ASAGLPKQQLW	40.57	1197.65	11	1.1	599.833	49.91		11600000	O00623|PEX12_HUMAN			78.6	0.25	1
ASKGPEALQEF	15.66	1175.58	11	-1.3	588.798	44.98	2110000	11400000	Q2TAL8|QRIC1_HUMAN			10837.5	9.5	0
ASRVLISTDVW	23.6	1245.67	11	-0.2	623.843	59.88	557000	5190000	P38919|IF4A3_HUMAN			232.3	0.5	1
ASRYLDKTEQW	24.35	1395.68	11	1.7	466.234	36.53		4120000	P0C0L4|CO4A_HUMAN:P0C0L5|CO4B_HUMAN			233.5	0.5	1
ASYSGKAADVW	43.12	1153.54	11	-0.4	577.777	40.54	1310000	41500000	Q96RU7|TRIB3_HUMAN			397.8	0.7	1
ATDPNILGRTW	29.53	1242.64	11	-2.1	622.324	57.28		5330000	P78527|PRKDC_HUMAN			647.5	1	1
ATFHQRGIALW	40.89	1298.69	11	-0.2	650.351	49.98	7320000	57100000	P55884|EIF3B_HUMAN			41.5	0.125	1
ATHYTITIRGV	10.46	1230.67	11	-1.8	411.231	32.09		413000	P24821|TENA_HUMAN			26266.4	38	0
ATIKDIREHEW	39.32	1396.71	11	-0.2	466.577	36.64	2640000	37500000	P54646|AAPK2_HUMAN			183.6	0.5	1
ATLGNFAKATF	48.2	1139.6	11	1.2	570.807	55.31	6960000	11200000	P15880|RS2_HUMAN			7059.1	6	0
ATTIHQIVRQW	25.11	1351.74	11	-0.3	451.586	43.18		2030000	O60568|PLOD3_HUMAN			142.7	0.4	1
ATTPSAVFRVW	32.1	1233.65	11	1.7	617.834	63.61		3010000	Q9NRG9|AAAS_HUMAN			222.7	0.5	1
C(+119.00)SKPEQLVVTF	17.16	1368.64	11	-2	685.327	53.6	12700000	16700000	Q00325|MPCP_HUMAN	Cysteinylation	C1:Cysteinylation:1000.00	7738.7	6.5	0
ETFALTSLETV	11.92	1209.61	11	0.4	605.814	49.34		857000	P21359|NF1_HUMAN			29434.2	49	0
FAYKDQNENRW	35.56	1469.67	11	-0.1	490.897	36.07		3740000	Q99590|SCAFB_HUMAN			139.5	0.4	1
GHTRTVNCVSW	10.67	1258.59	11	-0.1	630.301	30.48		317000	Q9H7D7|WDR26_HUMAN			40.9	0.125	1
GIKDGATMKTF	13.53	1167.6	11	-1.9	584.804	34.45	3320000	2360000	P31749|AKT1_HUMAN			21917.3	26	0
GSARQHALYIW	17.08	1300.67	11	-0.2	651.341	45.89		3550000	Q15291|RBBP5_HUMAN			52.9	0.175	1
GSRVHPETYEW	23.35	1359.62	11	-0.4	454.214	35.77		3360000	Q7KZ85|SPT6H_HUMAN			77.4	0.25	1
GSSHLISTSSW	26.74	1160.55	11	0.1	581.28	46.16		7070000	Q5VT06|CE350_HUMAN			172.4	0.4	1
GSSLPADVHRY	34.43	1200.59	11	1.9	401.204	30.71	6340000	4970000	Q96KA5|CLP1L_HUMAN			2193	2.5	0
GSSRSVVNM(+15.99)EW	23.02	1266.57	11	-0.4	634.29	38.48		1290000	P07814|SYEP_HUMAN	Oxidation (M)	M9:Oxidation (M):1000.00	14.2	0.03	1
GTAAVFNAVNW	15.34	1148.56	11	1	575.289	73.86		2390000	Q01581|HMCS1_HUMAN			322.2	0.7	1
GTFEYEYSQRW	13.19	1464.63	11	0.6	733.323	57.19		1790000	P23246|SFPQ_HUMAN			25.4	0.07	1
GTWIGKGTERW	36.25	1289.65	11	0.3	430.891	41.47	2140000	44300000	Q9C0C9|UBE2O_HUMAN			325.5	0.7	1
GTYM(+15.99)GHTGAVW	41.64	1194.51	11	-0.8	598.263	38.28	928000	31100000	Q13347|EIF3I_HUMAN	Oxidation (M)	M4:Oxidation (M):1000.00	23.2	0.06	1
GTYMGHTGAVW	32.22	1178.52	11	1.2	590.267	46.43		4200000	Q13347|EIF3I_HUMAN			119.3	0.3	1
HAAVAVGHRVY	31.62	1178.63	11	3	393.885	21.51	692000	322000	Q9BQ90|KLDC3_HUMAN			7228	6	0
HARKNTELEEW	19.02	1411.68	11	0.7	471.569	26.26		3140000	O60934|NBN_HUMAN			86.8	0.25	1
HSGPRGTHDLW	12.66	1261.6	11	-0.3	421.539	25.4		3220000	Q04446|GLGB_HUMAN			61.8	0.2	1
HSNEQTLQRSW	40.82	1384.65	11	0.3	693.332	28.67		16800000	Q9Y6J8|STYL1_HUMAN			48.2	0.15	1
HTFFDHQDQVW	14.15	1458.63	11	1.8	487.219	54.6		7730000	Q9GZS3|WDR61_HUMAN			25.7	0.07	1
HTNQDHVHAVW	41.95	1342.62	11	0.1	448.546	24.23		50700000	Q9UNY4|TTF2_HUMAN			77.1	0.25	1
HTRAASIYSSW	42.85	1277.62	11	-0.1	639.815	37.87	5330000	41500000	Q92538|GBF1_HUMAN			23.9	0.06	1
HTSDVPGKLIY	52.73	1228.65	11	-1.2	615.329	39.05	15800000	13500000	P05107|ITB2_HUMAN			5733.5	5	0
HTVRDHLVGRW	36.83	1374.73	11	-0.4	459.249	28.16		6500000	P06737|PYGL_HUMAN:P11216|PYGB_HUMAN:P11217|PYGM_HUMAN			33.6	0.1	1
IATKVLGTVKW	22.17	1214.74	11	-1.3	405.92	49.04		7130000	P67809|YBOX1_HUMAN			116.7	0.3	1
IGLPGAGKTTW	33.78	1099.6	11	-0.1	550.808	53.58		15900000	Q00839|HNRPU_HUMAN			407.9	0.8	1
ISAPDKRIYQF	37.25	1336.71	11	-1.3	446.578	46.2	39800000	57200000	O75563|SKAP2_HUMAN			261.1	0.6	1
ISDHEATLRC(+119.00)W	35.41	1448.62	11	0.6	725.317	36.96	1300000	52500000	P30485|1B47_HUMAN:P30492|1B54_HUMAN:P30484|1B46_HUMAN:Q29940|1B59_HUMAN:P30464|1B15_HUMAN:P30493|1B55_HUMAN:P30495|1B56_HUMAN:P18465|1B57_HUMAN:Q29718|1B82_HUMAN:P01889|1B07_HUMAN:P30480|1B42_HUMAN:Q95365|1B38_HUMAN:P30475|1B39_HUMAN:Q29836|1B67_HUMAN:P30462|1B14_HUMAN:P30479|1B41_HUMAN:P30483|1B45_HUMAN:P30488|1B50_HUMAN:P30487|1B49_HUMAN:P03989|1B27_HUMAN:Q04826|1B40_HUMAN:P30460|1B08_HUMAN:P30…	Cysteinylation	C10:Cysteinylation:1000.00	42.9	0.15	1
ISFIEDPERKY	33.59	1395.7	11	1.5	466.242	46.09	15500000	24100000	Q9NW61|PKHJ1_HUMAN			1014.3	1.3	1
ISIFRALMYII	11.32	1338.77	11	-0.7	447.265	46.91		3350000	P29972|AQP1_HUMAN			951.3	1.3	1
ISKCGDLDVIF	16.72	1208.61	11	-1.3	605.312	54.16		2130000	Q17RD7|SYT16_HUMAN			10418.1	9	0
ISKKSSDSRQF	16.22	1281.67	11	-0.7	428.23	16.27	319000	138000	Q9NVP1|DDX18_HUMAN			2076.2	2.5	0
ISLPDDVRRRL	12.54	1338.77	11	-0.3	447.265	45.89	3660000	10800000	P26358|DNMT1_HUMAN			1847.7	2	1
ITIPDIKKDRW	36.62	1383.79	11	0.4	462.27	48.56	3500000	101000000	O14757|CHK1_HUMAN			24.7	0.07	1
ITRKIKDSDAY	33	1308.7	11	0.3	437.242	20	2280000	2900000	Q8TCY9|URGCP_HUMAN			11953.2	11	0
ITSQVTGQIGW	17.35	1188.61	11	0	595.314	62.42		3450000	Q96CW1|AP2M1_HUMAN			121.2	0.4	1
ITSSAKVDM(+15.99)TF	55.07	1214.59	11	-1	608.299	36.42	85700000	115000000	Q14318|FKBP8_HUMAN	Oxidation (M)	M9:Oxidation (M):1000.00	149.4	0.4	1
ITSSAKVDMTF	24.45	1198.59	11	0.2	600.303	47.5	2090000	4560000	Q14318|FKBP8_HUMAN			674.2	1	1
ITSSIHSKETF	56.91	1248.63	11	-0.1	625.325	28.47	139000000	160000000	Q07864|DPOE1_HUMAN			1630.9	1.8	1
ITSVQQRLKLY	23.84	1347.79	11	0.9	450.27	43.23	1330000	3200000	P62495|ERF1_HUMAN			1722.1	1.9	1
ITYDDPIKTSW	38.68	1337.65	11	2.4	669.834	59.33		8270000	Q9UJV9|DDX41_HUMAN			11.2	0.02	1
IVDPNGLARLW	10.56	1252.69	11	0.8	627.354	70.65		693000	P41212|ETV6_HUMAN			882.3	1.2	1
IVRPSIVGASW	26.94	1183.67	11	3.1	592.845	57.09		6300000	Q8WVX9|FACR1_HUMAN			145.5	0.4	1
KAAEAAASAYY	24.94	1114.53	11	-2.3	558.271	33.1	2800000	4230000	Q969T9|WBP2_HUMAN			2111.6	2.5	0
KAAEAHVDAHY	50.95	1210.57	11	-1	404.531	18.98	3560000	4370000	P55263|ADK_HUMAN			5384.7	5	0
KAAEVLNKHSL	17.28	1208.69	11	-2	403.902	21.54	205000	986000	P52272|HNRPM_HUMAN			5802	5	0
KAFAETHIKGF	51.32	1247.67	11	-1.7	416.895	32.38	8570000	11500000	P42704|LPPRC_HUMAN			185	0.5	1
KAFPHSSSLRY	25.18	1291.67	11	-0.4	431.563	27.71	2310000	1860000	Q8IYI8|ZN440_HUMAN			800.8	1.2	1
KAIEEGVNHM(+15.99)W	45.34	1328.62	11	0.2	665.317	31.52		30500000	P46926|GNPI1_HUMAN:Q8TDQ7|GNPI2_HUMAN	Oxidation (M)	M10:Oxidation (M):1000.00	12.2	0.025	1
KAIEEGVNHMW	37.12	1312.62	11	0.9	438.549	40.07		3650000	P46926|GNPI1_HUMAN:Q8TDQ7|GNPI2_HUMAN			21.8	0.05	1
KAIPRPDGIEW	19.15	1280.69	11	0.9	641.352	46.17		13000000	Q6PIY7|GLD2_HUMAN			86.3	0.25	1
KAKIAEQVASF	16.35	1190.67	11	-3	596.338	35.44	89500	263000	P35221|CTNA1_HUMAN			3366	3.5	0
KAKLHELNQKW	21.73	1393.78	11	-0.4	465.601	21.9		2620000	Q13813|SPTN1_HUMAN			74.1	0.25	1
KALDAAFYKTF	13.56	1273.67	11	1.2	637.843	51.6	274000	329000	P10155|RO60_HUMAN			499.1	0.9	1
KALTEPEARYY	20.65	1339.68	11	-0.9	447.566	33.41	1840000	350000	P53350|PLK1_HUMAN			785.1	1.1	1
KAM(+15.99)QSLKSRGY	42.11	1283.67	11	0.6	428.896	17.51	2740000	3950000	P46783|RS10_HUMAN	Oxidation (M)	M3:Oxidation (M):1000.00	310.4	0.6	1
KAMQSLKSRGY	37.24	1267.67	11	0.8	423.565	19.04	442000	269000	P46783|RS10_HUMAN			3310.9	3.5	0
KANLEKAKQTL	24.32	1242.73	11	0.2	415.25	19.92	674000	493000	P35579|MYH9_HUMAN			15355.4	15	0
KAPEGSPPPLF	15.48	1138.6	11	-0.2	570.308	38.98	1590000	2050000	Q9H4S2|GSX1_HUMAN			8902.5	7.5	0
KARHSDIVVLY	20.1	1299.73	11	2.5	434.252	33.01	1380000	902000	Q6PCD5|RFWD3_HUMAN			2755.9	3	0
KARSDGWERAF	10.83	1321.65	11	-1.7	441.557	30.84		366000	Q9H6S0|YTDC2_HUMAN			1332.5	1.6	1
KARVETQNHWF	21.6	1414.71	11	-0.2	472.577	30.02		5360000	P28066|PSA5_HUMAN			93.9	0.3	1
KASELHSVRKL	50.19	1266.74	11	0.1	423.254	18.12	21800000	26200000	O43822|CF410_HUMAN			6570.6	5.5	0
KAVDSQILPKI	32.54	1210.73	11	2.1	404.584	44.33	1890000	3610000	Q02878|RL6_HUMAN			9538.7	8	0
KAWESSSRQKW	21.64	1391.69	11	-0.4	464.905	23.97		733000	Q14679|TTLL4_HUMAN			30	0.09	1
KIADMGHLKYY	24	1337.68	11	-0.2	446.901	38.34		1170000	P12004|PCNA_HUMAN			8015	7	0
KITSVHSRIIW	42.86	1338.78	11	1.2	447.267	36.33	1350000	13100000	Q6IA86|ELP2_HUMAN			95.4	0.3	1
KSDEGHPFRAY	40.98	1305.61	11	-0.3	436.211	22.24	11300000	27200000	Q9NQC3|RTN4_HUMAN			18121.6	19	0
KSFAATISRTT	10.37	1181.64	11	-0.8	394.887	24.48		620000	Q5T4S7|UBR4_HUMAN			5279.1	4.5	0
KSFGSAQEFAW	13.58	1256.58	11	1.4	629.299	57.72		5680000	P35606|COPB2_HUMAN			10.9	0.02	1
KSFIQKKM(+15.99)QNW	33.99	1452.75	11	0.8	485.259	24.78		22500000	Q9BY44|EIF2A_HUMAN	Oxidation (M)	M8:Oxidation (M):1000.00	14.3	0.03	1
KSFIQKKMQNW	40.02	1436.76	11	-0.2	479.927	32.85		5490000	Q9BY44|EIF2A_HUMAN			17.3	0.04	1
KSFPDTGSLNL	10.49	1177.6	11	0.5	589.807	54.09		4960000	Q9H3P2|NELFA_HUMAN			2608.7	3	0
KSFSDTLKTYF	38.97	1335.67	11	1.4	668.844	62.29	12000000	31500000	Q9BUL8|PDC10_HUMAN			105.6	0.3	1
KSFSKSDLVNW	38.48	1309.67	11	2.6	655.842	46.4	1050000	79400000	O43847|NRDC_HUMAN			34	0.1	1
KSHLNLDDRRW	23.62	1438.74	11	0.3	360.693	27.96		3290000	Q5SY16|NOL9_HUMAN			36.8	0.125	1
KSIDAGPVDAW	39.19	1157.57	11	-0.3	579.793	49.04	109000	23100000	Q9GZS3|WDR61_HUMAN			139.5	0.4	1
KSIGPPEM(+15.99)HKY	19.95	1301.64	11	-2	434.888	21.09	566000	826000	Q8IY18|SMC5_HUMAN	Oxidation (M)	M8:Oxidation (M):1000.00	248.1	0.6	1
KSKAM(+15.99)TGVEQW	38.58	1279.62	11	0.5	640.819	25.12		162000000	P49368|TCPG_HUMAN	Oxidation (M)	M5:Oxidation (M):1000.00	11	0.02	1
KSKAMTGVEQW	41.41	1263.63	11	-1.1	422.216	31		56900000	P49368|TCPG_HUMAN			46.9	0.15	1
KSKDIVNKM(+15.99)TF	51.97	1325.7	11	-1.3	442.907	22.94	17300000	19800000	P52732|KIF11_HUMAN	Oxidation (M)	M9:Oxidation (M):1000.00	87.1	0.25	1
KSKDIVNKMTF	27.53	1309.71	11	0.6	437.576	30.56	860000	3420000	P52732|KIF11_HUMAN			524	0.9	1
KSKEDLVSQGF	48.97	1236.63	11	-1.1	619.324	35.1	82100000	101000000	Q96FW1|OTUB1_HUMAN			3055.9	3	0	Weak binders
KSKILSKVEKF	36.11	1305.8	11	-1.9	436.274	26.29	1790000	3650000	Q96RS0|TGS1_HUMAN			1670.5	1.9	1
KSKISPKSDVW	38.81	1273.7	11	-0.9	425.575	23.23		7120000	P33981|TTK_HUMAN			53.5	0.175	1
KSKLDAEVSKW	65.06	1289.7	11	1.5	430.907	32.51	13500000	255000000	P35221|CTNA1_HUMAN			63.2	0.2	1
KSKLSEIVREF	18.73	1334.76	11	1.1	445.926	44.24		892000	O60264|SMCA5_HUMAN:P28370|SMCA1_HUMAN			1626.3	1.8	1
KSKPDKQLIQY	37.63	1346.76	11	0.8	449.926	24.57	27800000	37200000	Q03933|HSF2_HUMAN			1727.9	1.9	1
KSKPGAAM(+15.99)VEM	13.71	1163.57	11	-1	582.791	20.86		384000	P14866|HNRPL_HUMAN	Oxidation (M)	M8:Oxidation (M):0.00	1449	1.7	1
KSKPGAAM(+15.99)VEM(+15.99)	39.43	1179.56	11	-0.1	590.789	17.02	21300000	17900000	P14866|HNRPL_HUMAN	Oxidation (M)	M8:Oxidation (M):1000.00;M11:Oxidation (M):1000.00	3337.6	3.5	0
KSKPGAAMVEM(+15.99)	32.3	1163.57	11	0.5	582.792	19.79	3460000	4840000	P14866|HNRPL_HUMAN	Oxidation (M)	M11:Oxidation (M):101.94	1408.5	1.7	1
KSKPVEKNYAF	54.88	1309.7	11	0.4	437.575	22.38	151000000	177000000	P09884|DPOLA_HUMAN			421.1	0.8	1
KSKQKEDNHIF	14.23	1372.71	11	0.5	458.577	16.97	1180000	3280000	Q96PZ2|F111A_HUMAN			2071.2	2.5	0
KSKVLNESVSF	38.79	1236.67	11	0.3	619.343	36.83	11200000	12800000	P29728|OAS2_HUMAN			999.1	1.3	1
KSLKISGIKDF	34.47	1234.73	11	-1.5	412.583	37.54	5480000	9190000	P55884|EIF3B_HUMAN			493.1	0.9	1
KSLPEEDVAEI	16.69	1228.62	11	2.7	615.318	46.13	13300000	15200000	O60832|DKC1_HUMAN			3438.8	3.5	0
KSLPEFPDSGF	15.28	1222.59	11	-0.9	612.3	58.93	601000	1290000	Q8IW35|CEP97_HUMAN			1276.9	1.6	1
KSLSDTAKPHI	58.04	1195.66	11	-0.5	399.559	24.46	28800000	31900000	Q13118|KLF10_HUMAN			5451	5	0
KSRDLFVSTSW	14.68	1324.68	11	0.4	442.567	50.54	1150000	9780000	Q9BRQ8|AIFM2_HUMAN			13.6	0.03	1
KSRPEDQRSSF	22.75	1335.65	11	0.4	446.225	17.44	1420000	2180000	Q9UPZ3|HPS5_HUMAN			558.7	0.9	1
KSSPQIPHQTY	44.84	1284.65	11	-1.1	429.222	26.29	18500000	22800000	Q16659|MK06_HUMAN			743.3	1.1	1
KSSQLISHKRF	39.92	1329.75	11	-1.2	444.257	19.45	781000	983000	P59923|ZN445_HUMAN			374.8	0.7	1
KSSRDKELYAW	16.12	1381.7	11	0	461.574	31.91		1120000	Q15652|JHD2C_HUMAN			19.9	0.05	1
KSVTAHLAAKW	40.49	1210.68	11	-0.8	404.568	28.08		2810000	Q9NYU1|UGGG2_HUMAN			20	0.05	1
KSWPEGHFATI	28.78	1271.63	11	-0.6	424.884	44.5		17400000	O95433|AHSA1_HUMAN			728.6	1.1	1
KSYELPDGQVI	18.28	1247.64	11	1.2	624.828	56.06	1930000	9030000	P60709|ACTB_HUMAN:P68133|ACTS_HUMAN:P68032|ACTC_HUMAN:P0CG39|POTEJ_HUMAN:Q6S8J3|POTEE_HUMAN:A5A3E0|POTEF_HUMAN:P0CG38|POTEI_HUMAN			3313.1	3.5	0
KSYPGSQSQLF	44.55	1240.61	11	-0.2	621.312	43.98	18300000	22400000	A2RUB6|CCD66_HUMAN			298.7	0.6	1
KTAGYQAVKRW	48.07	1306.71	11	-0.4	436.579	23.63		7200000	Q9P0U3|SENP1_HUMAN			20.8	0.05	1
KTCGKTFSCSY	11	1223.53	11	-0.7	612.773	42.02		119000	Q9H5J0|ZBTB3_HUMAN			5267.3	4.5	0
KTDPVDIYKSW	22	1350.68	11	1	676.349	51.27		2570000	P46940|IQGA1_HUMAN			71.4	0.25	1
KTIQTIALITY	14.41	1263.74	11	0.1	632.879	61.92	373000	1080000	P51532|SMCA4_HUMAN:P51531|SMCA2_HUMAN			1497.5	1.7	1
KTKDHTLVQTI	31.11	1282.72	11	-2.1	428.581	25.06	17600000	20800000	Q14684|RRP1B_HUMAN			12699.8	12	0
KTKGGSKYLIY	12.86	1256.71	11	-0.6	419.911	26.62	1280000	1140000	Q15080|NCF4_HUMAN			7066.6	6	0
KTKGKRFTYKF	14.46	1402.81	11	-1.6	468.609	20.56	545000	190000	Q6ZN32|ETV3L_HUMAN:P41162|ETV3_HUMAN			303.1	0.6	1
KTKNVKEYVRW	41.67	1449.81	11	-0.2	484.277	27.13		6280000	Q6NUK4|REEP3_HUMAN			53.4	0.175	1
KTKPEGRSVTW	16.36	1287.69	11	-1.7	430.238	20.43		3070000	Q8N6M6|AMPO_HUMAN			29.7	0.09	1
KTKPEVLEAHY	51.65	1313.7	11	-1	438.906	26.31	5970000	5530000	Q7Z7B0|FLIP1_HUMAN			2251.7	2.5	0
KTKQDEVNAAW	32.45	1288.64	11	0.4	430.555	28.33		14700000	Q13813|SPTN1_HUMAN			96.6	0.3	1
KTKRSIQFVDW	21.67	1406.77	11	-0.1	469.93	40.94		20000000	P68363|TBA1B_HUMAN:P68366|TBA4A_HUMAN			55.5	0.175	1
KTKSTETEHSF	27.43	1293.62	11	-0.5	432.214	16.1		554000	Q9UHC1|MLH3_HUMAN			675.9	1	1
KTKTLDPKAVF	15.34	1246.73	11	-0.6	416.583	33.64	989000	3960000	Q9HCE5|MET14_HUMAN			2950.7	3	0
KTLKGHSNYVF	14.21	1292.69	11	-0.1	431.903	24.75	1160000	446000	P61964|WDR5_HUMAN:Q86VZ2|WDR5B_HUMAN			192.7	0.5	1
KTLNRIQSKLY	20.01	1362.8	11	0.9	455.274	27.16	2460000	4980000	O75643|U520_HUMAN			931	1.3	1
KTLPADVQNYY	51.21	1310.65	11	1.2	656.333	47.01	53900000	68400000	Q99590|SCAFB_HUMAN			156.6	0.4	1
KTLPETSLPNY	46.25	1261.66	11	1	631.836	46.61	54700000	65900000	Q9BYI3|HYCCI_HUMAN			916.5	1.3	1
KTLVNPANVTF	50.21	1202.67	11	-1	602.34	53.74	131000000	170000000	O75608|LYPA1_HUMAN			175.9	0.4	1
KTM(+15.99)NEKAWKRW	13.93	1492.76	11	-0.1	498.594	20.95		599000	Q9UHY1|NRBP_HUMAN	Oxidation (M)	M3:Oxidation (M):1000.00	8.1	0.01	1
KTNDFTKIKGW	33.9	1336.71	11	0.9	446.579	36.76		2330000	Q8IWI9|MGAP_HUMAN			26.7	0.07	1
KTRDGSDYEGW	23.4	1312.57	11	0.2	438.53	31.11		5440000	Q14697|GANAB_HUMAN			175.6	0.4	1
KTRENHLVSTF	21.11	1330.7	11	-0.3	444.574	25.43	10600000	12600000	P41247|PLPL4_HUMAN			1256.6	1.6	1
KTRGDHFKLRF	37.32	1403.78	11	-0.4	468.933	24.27	15200000	27400000	O43257|ZNHI1_HUMAN			592.5	1	1
KTRIISDGLKY	38.53	1292.75	11	-0.8	431.922	30.34	8960000	11900000	P30876|RPB2_HUMAN			2553.5	2.5	0
KTRLDNGVTGF	23.17	1206.64	11	1	403.219	34.91	13500000	5860000	Q7KZ85|SPT6H_HUMAN			3574.9	3.5	0
KTRLEQEIATY	15.18	1350.71	11	0.4	451.246	41.23	785000	260000	P35900|K1C20_HUMAN:P19012|K1C15_HUMAN:P02533|K1C14_HUMAN:P08779|K1C16_HUMAN			2120.3	2.5	0
KTSELYQKTYW	38.27	1445.72	11	-0.3	482.913	42.16		3890000	Q8NHP8|PLBL2_HUMAN			26.2	0.07	1
KTSHLRAHLRW	21.64	1403.79	11	-2.2	351.954	21.06		1140000	P08047|SP1_HUMAN:Q02447|SP3_HUMAN:Q02446|SP4_HUMAN			13.8	0.03	1
KTVDGPSGKLW	53.69	1186.63	11	-0.2	594.324	35.84	262000	69900000	P04406|G3P_HUMAN			21.4	0.05	1
KTVKYFKGLMH	12.01	1350.75	11	-1.2	451.256	29.21		54500	Q8TDQ7|GNPI2_HUMAN			10149.9	9	0
KTVSSTKLVSF	42.12	1195.68	11	0.5	598.848	35.89	7200000	8930000	P11717|MPRI_HUMAN			843.1	1.2	1
KTVYTGIDHHW	52.34	1355.66	11	-1.4	452.894	31.83	682000	15700000	Q9NV06|DCA13_HUMAN			23	0.06	1
KTYNEPGSQVF	41.23	1268.6	11	0.6	635.309	39.25	63400000	80000000	Q86U86|PB1_HUMAN			1136.8	1.5	1
KTYPVNTPERW	30.94	1389.7	11	-2.6	464.241	37.33		13500000	Q99543|DNJC2_HUMAN			8.2	0.01	1
KVAEPAEYLKY	11.61	1309.69	11	-1.1	437.571	33.47		343000	Q92618|ZN516_HUMAN			15639.4	15	0
KVAIKVGGRYL	28.18	1202.75	11	-1.7	401.923	33.72	5660000	7480000	Q16658|FSCN1_HUMAN			12569.3	11	0
KVARDQAVKKW	22.41	1327.77	11	0	443.598	18.28		3900000	O75792|RNH2A_HUMAN			90.3	0.25	1
KVDEVKSTIKF	68.94	1292.73	11	-0.9	431.918	33.23	125000000	139000000	P62906|RL10A_HUMAN			18348.3	19	0
KVDPAKDRELW	36.27	1355.72	11	0.6	452.914	32.81		3350000	O60861|GAS7_HUMAN			566	0.9	1
KVIHEQVNHRW	47.74	1444.77	11	-1	482.596	19.83	5990000	106000000	P11388|TOP2A_HUMAN			81.8	0.25	1
KVKDEKIRQAF	27.53	1360.78	11	1.2	454.602	21.35	1270000	1650000	Q9NTJ3|SMC4_HUMAN			22806.8	28	0
KVKIPEELKPW	14.77	1365.8	11	-0.3	456.274	46.02		373000	Q9UBU8|MO4L1_HUMAN:Q15014|MO4L2_HUMAN			704.9	1.1	1
KVKSEEVFDEW	10.85	1394.67	11	-0.9	698.342	47.41		1660000	Q9H4L5|OSBL3_HUMAN			1009.2	1.3	1
KVLSPKYLGSW	14.84	1276.72	11	0.7	639.367	49.34		2510000	Q9UJY4|GGA2_HUMAN			56.6	0.175	1
[truncated: 266 more rows]
